# Supplementary material for: Mutational concordance analysis provides supportive information for double cancer diagnosis
Source: PubMed Central journal article supplement (PMC7893960; doi:10.1186/s12885-021-07899-1), 2021-02-19
Supplement: 12885_2021_7899_MOESM1_ESM.pdf [file 12885_2021_7899_MOESM1_ESM.pdf]

**Mutational concordance analysis provides supportive information for  
double cancer diagnosis**

Keiichi Hatakeyama, Takeshi Nagashima, Akifumi Notsu, Keiichi Ohshima, Sumiko  
Ohnami, Shumpei Ohnami, Yuji Shimoda, Akane Naruoka, Koji Maruyama, Akira Iizuka,  
Tadashi Ashizawa, Hirotsugu Kenmotsu, Tohru Mochizuki, Kenichi Urakami, Yasuto  
Akiyama and Ken Yamaguchi

Table S1 Sample list used in main analysis

| ID    | Operation date (yyyy/mm/dd) | Cancer type   | Status     | Tissue                        | TMB      | Number of total mutation |            | Number of common mutation |            |
|-------|-----------------------------|---------------|------------|-------------------------------|----------|--------------------------|------------|---------------------------|------------|
|       |                             |               |            |                               |          | Nonsynonymous            | Synonymous | Nonsynonymous             | Synonymous |
| SCC1  | 2017/11/1                   | double_cancer | primary1   | colon (ascending)             | 3.28096  | 71                       | 40         | 0                         | 0          |
| SCC2  | 2017/11/1                   | double_cancer | primary2   | stomach                       | 0.537253 | 12                       | 6          | 0                         | 0          |
| SCC3  | 2015/2/5                    | double_cancer | primary1   | colon (transverse)            | 2.30388  | 44                       | 32         | 0                         | 0          |
| SCC4  | 2015/6/23                   | double_cancer | primary2   | lung                          | 8.58338  | 200                      | 78         | 0                         | 0          |
| SCC5  | 2016/8/8                    | double_cancer | primary1   | colon (sigmoid)               | 5.6328   | 132                      | 55         | 0                         | 0          |
| SCC6  | 2016/9/16                   | double_cancer | primary2   | lung                          | 4.14955  | 95                       | 40         | 0                         | 0          |
| SCC7  | 2015/3/27                   | double_cancer | primary1   | colon (rectum)                | 3.66429  | 90                       | 32         | 48                        | 48         |
| SCC8  | 2017/3/1                    | double_cancer | primary2   | pancreas                      | 2.90752  | 68                       | 31         | 48                        | 48         |
| SCC9  | 2017/11/27                  | double_cancer | primary1   | esophagus                     | 15.0431  | 314                      | 195        | 0                         | 0          |
| SCC10 | 2017/3/1                    | double_cancer | primary2   | head&neck (gingiva)           | 1.84365  | 41                       | 21         | 0                         | 0          |
| SCC11 | 2014/8/25                   | double_cancer | primary1   | stomach                       | 0.215523 | 6                        | 1          | 0                         | 0          |
| SCC12 | 2014/10/6                   | double_cancer | primary2   | lung                          | 1.49947  | 29                       | 19         | 0                         | 0          |
| SCC13 | 2015/1/26                   | double_cancer | primary1   | pancreas                      | 2.05136  | 49                       | 20         | 0                         | 0          |
| SCC14 | 2015/4/20                   | double_cancer | primary2   | lung                          | 5.6196   | 131                      | 58         | 0                         | 0          |
| SCC15 | 2015/1/19                   | double_cancer | primary1   | liver                         | 7.23138  | 157                      | 88         | 0                         | 0          |
| SCC16 | 2015/6/17                   | double_cancer | primary2   | colon (rectum)                | 1.16399  | 29                       | 10         | 0                         | 0          |
| SCC17 | 2015/11/17                  | double_cancer | primary1   | lung                          | 0.150929 | 2                        | 3          | 0                         | 0          |
| SCC18 | 2015/11/17                  | double_cancer | primary2   | esophagus                     | 2.0341   | 41                       | 26         | 0                         | 0          |
| SCC19 | 2017/11/15                  | double_cancer | primary1   | stomach                       | 5.53707  | 136                      | 50         | 0                         | 0          |
| SCC20 | 2017/11/15                  | double_cancer | primary2   | breast                        | 0.954303 | 23                       | 9          | 0                         | 0          |
| SCC21 | 2014/7/14                   | double_cancer | primary1   | lung                          | 13.7398  | 291                      | 137        | 0                         | 0          |
| SCC22 | 2014/10/1                   | double_cancer | primary2   | stomach                       | 11.4199  | 254                      | 131        | 0                         | 0          |
| SCC23 | 2015/6/5                    | double_cancer | primary1   | soft tissue (ischialic nerve) | 0.653755 | 15                       | 7          | 13                        | 13         |
| SCC24 | 2015/7/24                   | double_cancer | primary2   | soft tissue (thigh)           | 1.39292  | 30                       | 16         | 13                        | 13         |
| SCC25 | 2016/9/20                   | double_cancer | primary1   | colon (sigmoid)               | 5.22963  | 124                      | 51         | 0                         | 0          |
| SCC26 | 2016/10/27                  | double_cancer | primary2   | stomach                       | 0.215582 | 4                        | 3          | 0                         | 0          |
| SCC27 | 2014/10/24                  | double_cancer | primary1   | stomach                       | 4.47901  | 94                       | 50         | 0                         | 0          |
| SCC28 | 2015/1/6                    | double_cancer | primary2   | lung                          | 1.49676  | 34                       | 15         | 0                         | 0          |
| SCC29 | 2017/3/1                    | double_cancer | primary1   | stomach                       | 1.57544  | 33                       | 20         | 0                         | 0          |
| SCC30 | 2017/4/26                   | double_cancer | primary2   | lung                          | 3.29333  | 79                       | 32         | 0                         | 0          |
| SCC31 | 2014/8/19                   | double_cancer | primary1   | uterus (corpus)               | 2.15945  | 49                       | 20         | 0                         | 0          |
| SCC32 | 2015/6/10                   | double_cancer | primary2   | liver                         | 2.94873  | 61                       | 37         | 0                         | 0          |
| SCC33 | 2014/4/2                    | double_cancer | primary1   | colon (transverse)            | 2.48553  | 46                       | 27         | 0                         | 0          |
| SCC34 | 2014/5/23                   | double_cancer | primary2   | liver                         | 3.95622  | 77                       | 45         | 0                         | 0          |
| SCC35 | 2017/10/23                  | double_cancer | primary1   | colon (rectum)                | 1.77792  | 36                       | 24         | 0                         | 0          |
| SCC36 | 2017/12/21                  | double_cancer | primary2   | lung                          | 3.44168  | 77                       | 39         | 0                         | 0          |
| SCC37 | 2016/4/13                   | double_cancer | primary1   | breast                        | 1.46245  | 34                       | 15         | 0                         | 0          |
| SCC38 | 2016/7/13                   | double_cancer | primary2   | lung                          | 1.49424  | 32                       | 18         | 0                         | 0          |
| SCC39 | 2014/7/17                   | double_cancer | primary1   | colon (cecum)                 | 1.90866  | 36                       | 23         | 0                         | 0          |
| SCC40 | 2014/9/1                    | double_cancer | primary2   | liver                         | 2.7175   | 58                       | 30         | 0                         | 0          |
| SCC41 | 2016/9/13                   | double_cancer | primary1   | breast                        | 0.728738 | 18                       | 6          | 0                         | 0          |
| SCC42 | 2016/1/19                   | double_cancer | primary2   | lung                          | 0.772907 | 19                       | 7          | 0                         | 0          |
| SCC43 | 2017/3/3                    | double_cancer | primary1   | stomach                       | 8.26416  | 170                      | 110        | 0                         | 0          |
| SCC44 | 2017/3/3                    | double_cancer | primary2   | colon (transverse)            | 1.29508  | 22                       | 22         | 0                         | 0          |
| SCC45 | 2015/5/25                   | double_cancer | primary1   | colon (rectum)                | 2.58731  | 56                       | 30         | 0                         | 0          |
| SCC46 | 2016/2/5                    | double_cancer | primary2   | lung                          | 0.794343 | 17                       | 9          | 0                         | 0          |
| SCC47 | 2014/10/27                  | double_cancer | primary1   | liver                         | 3.17096  | 66                       | 35         | 0                         | 0          |
| SCC48 | 2014/12/15                  | double_cancer | primary2   | lung                          | 0.470831 | 9                        | 6          | 0                         | 0          |
| SCC49 | 2017/5/16                   | double_cancer | primary1   | esophagus                     | 2.3727   | 51                       | 29         | 0                         | 0          |
| SCC50 | 2017/5/16                   | double_cancer | primary2   | colon (sigmoid)               | 2.47411  | 53                       | 30         | 0                         | 0          |
| SCC51 | 2014/1/14                   | double_cancer | primary1   | esophagus                     | 4.85995  | 105                      | 50         | 0                         | 0          |
| SCC52 | 2014/1/14                   | double_cancer | primary2   | stomach                       | 0.151955 | 2                        | 3          | 0                         | 0          |
| SCC53 | 2017/6/14                   | double_cancer | primary1   | stomach                       | 0.716991 | 14                       | 10         | 0                         | 0          |
| SCC54 | 2017/6/14                   | double_cancer | primary2   | colon (descending)            | 1.99523  | 40                       | 27         | 0                         | 0          |
| SCC55 | 2014/7/23                   | double_cancer | primary1   | lung                          | 3.69696  | 77                       | 37         | 0                         | 0          |
| SCC56 | 2014/9/11                   | double_cancer | primary2   | head&neck (parotid gland)     | 2.33376  | 51                       | 25         | 0                         | 0          |
| SCC57 | 2015/9/24                   | double_cancer | primary1   | stomach                       | 2.86292  | 57                       | 36         | 0                         | 0          |
| SCC58 | 2015/11/18                  | double_cancer | primary2   | head&neck (hypopharynx)       | 7.51301  | 172                      | 76         | 0                         | 0          |
| SCC59 | 2016/3/31                   | double_cancer | primary1   | stomach                       | 31.944   | 725                      | 351        | 1                         | 1          |
| SCC60 | 2016/3/31                   | double_cancer | primary2   | colon (cecum)                 | 26.3009  | 560                      | 329        | 1                         | 1          |
| SCC61 | 2015/1/5                    | double_cancer | primary1   | colon (transverse)            | 3.88636  | 88                       | 43         | 0                         | 0          |
| SCC62 | 2015/3/17                   | double_cancer | primary2   | lung                          | 10.6087  | 238                      | 112        | 0                         | 0          |
| SCC63 | 2014/4/15                   | double_cancer | primary1   | colon (ascending)             | 0.094942 | 1                        | 2          | 0                         | 0          |
| SCC64 | 2014/5/26                   | double_cancer | primary2   | liver                         | 1.54236  | 31                       | 16         | 0                         | 0          |
| SCC65 | 2015/11/26                  | double_cancer | primary1   | pancreas                      | 0.337674 | 8                        | 3          | 0                         | 0          |
| SCC66 | 2016/6/22                   | double_cancer | primary2   | mediastinum                   | 0.627258 | 14                       | 7          | 0                         | 0          |
| SCC67 | 2014/2/13                   | double_cancer | primary1   | skin                          | 0.629192 | 10                       | 8          | 0                         | 0          |
| SCC68 | 2014/2/13                   | double_cancer | primary2   | unknown                       | 0.190859 | 2                        | 4          | 0                         | 0          |
| SCC69 | 2018/1/25                   | double_cancer | primary1   | colon (ascending)             | 3.11817  | 80                       | 26         | 0                         | 0          |
| SCC70 | 2018/1/25                   | double_cancer | primary2   | stomach                       | 1.30114  | 27                       | 17         | 0                         | 0          |
| SCC71 | 2015/2/25                   | double_cancer | primary1   | stomach                       | 0.84467  | 23                       | 5          | 0                         | 0          |
| SCC72 | 2015/2/25                   | double_cancer | primary2   | colon (rectum)                | 1.96225  | 38                       | 26         | 0                         | 0          |
| SCC73 | 2014/3/10                   | double_cancer | primary1   | liver                         | 2.80129  | 59                       | 28         | 0                         | 0          |
| SCC74 | 2016/10/7                   | double_cancer | primary2   | colon (cecum)                 | 4.02391  | 94                       | 40         | 0                         | 0          |
| SCC75 | 2017/6/12                   | double_cancer | primary1   | stomach                       | 0.177749 | 3                        | 3          | 0                         | 0          |
| SCC76 | 2017/6/12                   | double_cancer | primary2   | small intestine               | 0.266267 | 6                        | 3          | 0                         | 0          |
| SCC77 | 2015/10/20                  | double_cancer | primary1   | esophagus                     | 1.5086   | 30                       | 21         | 0                         | 0          |
| SCC78 | 2015/10/20                  | double_cancer | primary2   | stomach                       | 0.181869 | 5                        | 1          | 0                         | 0          |
| SCC79 | 2016/6/7                    | double_cancer | primary1   | colon (sigmoid)               | 4.18437  | 92                       | 45         | 0                         | 0          |
| SCC80 | 2016/7/25                   | double_cancer | primary2   | lung                          | 66.0803  | 1501                     | 701        | 0                         | 0          |
| SCC81 | 2014/2/13                   | double_cancer | primary1   | lung                          | 2.35163  | 53                       | 21         | 0                         | 0          |
| SCC82 | 2014/4/7                    | double_cancer | primary2   | head&neck (mouth)             | 2.20553  | 42                       | 29         | 0                         | 0          |
| SCC83 | 2014/6/2                    | double_cancer | primary1   | liver                         | 6.71123  | 141                      | 65         | 0                         | 0          |
| SCC84 | 2015/2/2                    | double_cancer | primary2   | lung                          | 0.029563 | 1                        | 0          | 0                         | 0          |
| SCC85 | 2015/4/6                    | double_cancer | primary1   | lung                          | 15.1172  | 333                      | 172        | 0                         | 0          |
| SCC86 | 2016/7/21                   | double_cancer | primary2   | stomach                       | 4.0134   | 84                       | 50         | 0                         | 0          |
| SCC87 | 2015/11/18                  | primary       | primary    | colon (transverse)            | 6.35789  | 121                      | 88         | 110                       | 81         |
| SCC88 | 2016/1/12                   | metastasis    | metastasis | liver                         | 6.56671  | 125                      | 95         | 110                       | 81         |
| SCC89 | 2015/3/26                   | primary       | primary    | colon (ascending)             | 1.17517  | 26                       | 13         | 22                        | 10         |
| SCC90 | 2015/6/29                   | metastasis    | metastasis | liver                         | 4.47816  | 97                       | 48         | 22                        | 10         |
| SCC91 | 2016/3/16                   | primary       | primary    | colon (rectum)                | 3.67472  | 81                       | 43         | 63                        | 24         |
| SCC92 | 2016/5/12                   | metastasis    | metastasis | liver                         | 3.26902  | 75                       | 31         | 63                        | 24         |
| SCC93 | 2017/2/10                   | primary       | primary    | colon (rectum)                | 3.49397  | 83                       | 36         | 47                        | 21         |
| SCC94 | 2018/1/5                    | metastasis    | metastasis | lung                          | 2.51926  | 56                       | 29         | 47                        | 21         |
| SCC95 | 2015/2/20                   | primary       | primary    | colon (sigmoid)               | 3.33043  | 67                       | 44         | 45                        | 30         |

|        |            |            |            |                    |          |      |     |      |     |
|--------|------------|------------|------------|--------------------|----------|------|-----|------|-----|
| SCC96  | 2015/4/20  | metastasis | metastasis | liver              | 2.86775  | 59   | 37  | 45   | 30  |
| SCC97  | 2014/11/25 | primary    | primary    | lung               | 0.154092 | 3    | 2   | 0    | 0   |
| SCC98  | 2016/12/22 | metastasis | metastasis | brain (cerebrum)   | 5.01171  | 114  | 54  | 0    | 0   |
| SCC99  | 2017/10/30 | primary    | primary    | colon (sigmoid)    | 1.9314   | 44   | 21  | 23   | 12  |
| SCC100 | 2017/12/14 | metastasis | metastasis | lung               | 4.42702  | 92   | 57  | 23   | 12  |
| SCC101 | 2015/3/10  | primary    | primary    | lung               | 1.70543  | 38   | 18  | 0    | 0   |
| SCC102 | 2016/8/10  | metastasis | metastasis | lung               | 0.365346 | 10   | 2   | 0    | 0   |
| SCC103 | 2015/3/24  | primary    | primary    | skin (face)        | 18.4795  | 326  | 268 | 151  | 123 |
| SCC104 | 2015/3/24  | metastasis | metastasis | lymph node         | 8.83414  | 158  | 135 | 151  | 123 |
| SCC105 | 2016/3/28  | primary    | primary    | colon (rectum)     | 3.49593  | 81   | 38  | 63   | 19  |
| SCC106 | 2017/9/25  | metastasis | metastasis | lung (rt_S10)      | 4.98466  | 115  | 50  | 63   | 19  |
| SCC107 | 2017/11/6  | primary    | primary    | colon (rectum)     | 3.5551   | 81   | 37  | 54   | 23  |
| SCC108 | 2017/12/21 | metastasis | metastasis | liver              | 3.18747  | 68   | 39  | 54   | 23  |
| SCC109 | 2014/8/7   | primary    | primary    | colon (rectum)     | 2.9611   | 65   | 30  | 59   | 23  |
| SCC110 | 2014/9/22  | metastasis | metastasis | liver              | 2.74868  | 63   | 26  | 59   | 23  |
| SCC111 | 2015/12/4  | primary    | primary    | colon (sigmoid)    | 2.6656   | 56   | 32  | 0    | 0   |
| SCC112 | 2016/2/1   | metastasis | metastasis | liver              | 0.648341 | 4    | 18  | 0    | 0   |
| SCC113 | 2017/2/3   | primary    | primary    | colon (rectum)     | 2.46059  | 53   | 30  | 47   | 26  |
| SCC114 | 2017/3/21  | metastasis | metastasis | liver              | 2.97097  | 64   | 35  | 47   | 26  |
| SCC115 | 2017/10/26 | primary    | primary    | colon (sigmoid)    | 2.4229   | 52   | 30  | 35   | 17  |
| SCC116 | 2017/9/4   | metastasis | metastasis | lung               | 2.42953  | 56   | 25  | 35   | 17  |
| SCC117 | 2017/6/30  | primary    | primary    | stomach            | 2.80764  | 49   | 45  | 32   | 24  |
| SCC118 | 2017/6/30  | metastasis | metastasis | liver              | 2.56302  | 50   | 35  | 32   | 24  |
| SCC119 | 2017/6/7   | primary    | primary    | colon (ascending)  | 1.9946   | 46   | 21  | 35   | 20  |
| SCC120 | 2017/7/13  | metastasis | metastasis | liver              | 3.52054  | 76   | 43  | 35   | 20  |
| SCC121 | 2014/4/16  | primary    | primary    | colon (sigmoid)    | 0.93377  | 17   | 13  | 15   | 10  |
| SCC122 | 2014/5/7   | metastasis | metastasis | liver              | 3.08961  | 58   | 36  | 15   | 10  |
| SCC123 | 2017/6/27  | primary    | primary    | colon (ascending)  | 4.75561  | 94   | 64  | 78   | 54  |
| SCC124 | 2017/8/14  | metastasis | metastasis | liver              | 5.11883  | 101  | 71  | 78   | 54  |
| SCC125 | 2015/4/7   | primary    | primary    | liver              | 1.28596  | 27   | 16  | 25   | 12  |
| SCC126 | 2017/6/21  | metastasis | metastasis | lung               | 3.81407  | 91   | 36  | 25   | 12  |
| SCC127 | 2016/9/15  | primary    | primary    | colon (rectum)     | 0.928971 | 18   | 13  | 14   | 8   |
| SCC128 | 2016/11/14 | metastasis | metastasis | liver              | 5.70616  | 125  | 65  | 14   | 8   |
| SCC129 | 2015/6/17  | primary    | primary    | colon (sigmoid)    | 4.30269  | 98   | 47  | 21   | 9   |
| SCC130 | 2016/4/11  | metastasis | metastasis | liver              | 2.06192  | 48   | 22  | 21   | 9   |
| SCC131 | 2016/10/28 | primary    | primary    | colon (rectum)     | 1.99247  | 44   | 23  | 34   | 17  |
| SCC132 | 2016/12/14 | metastasis | metastasis | liver              | 5.74558  | 131  | 61  | 34   | 17  |
| SCC133 | 2017/3/7   | primary    | primary    | esophagus          | 2.24091  | 48   | 27  | 26   | 15  |
| SCC134 | 2017/10/3  | metastasis | metastasis | brain (cerebrum)   | 3.09296  | 65   | 35  | 26   | 15  |
| SCC135 | 2015/2/20  | primary    | primary    | colon (rectum)     | 3.19747  | 65   | 40  | 20   | 13  |
| SCC136 | 2017/1/26  | metastasis | metastasis | lung               | 2.03134  | 38   | 30  | 20   | 13  |
| SCC137 | 2014/9/3   | primary    | primary    | lung               | 12.4003  | 276  | 130 | 265  | 128 |
| SCC138 | 2016/6/7   | metastasis | metastasis | brain (cerebrum)   | 16.3701  | 362  | 185 | 265  | 128 |
| SCC139 | 2015/1/28  | primary    | primary    | colon (rectum)     | 0.08953  | 2    | 1   | 0    | 0   |
| SCC140 | 2015/9/9   | metastasis | metastasis | liver              | 5.52514  | 123  | 58  | 0    | 0   |
| SCC141 | 2017/2/14  | primary    | primary    | stomach            | 1.4244   | 28   | 20  | 23   | 10  |
| SCC142 | 2017/12/13 | metastasis | metastasis | peritoneum         | 1.23766  | 26   | 16  | 23   | 10  |
| SCC143 | 2016/4/13  | primary    | primary    | pancreas           | 0.935662 | 21   | 10  | 13   | 5   |
| SCC144 | 2016/4/13  | metastasis | metastasis | liver              | 1.0287   | 24   | 10  | 13   | 5   |
| SCC145 | 2017/2/2   | primary    | primary    | colon (ascending)  | 3.87532  | 84   | 48  | 53   | 24  |
| SCC146 | 2017/3/27  | metastasis | metastasis | liver              | 3.22468  | 74   | 34  | 53   | 24  |
| SCC147 | 2014/7/28  | primary    | primary    | stomach            | 56.0475  | 1125 | 632 | 1046 | 578 |
| SCC148 | 2016/1/27  | metastasis | metastasis | liver              | 68.5604  | 1473 | 834 | 1046 | 578 |
| SCC149 | 2017/9/12  | primary    | primary    | colon (cecum)      | 3.42236  | 73   | 41  | 39   | 22  |
| SCC150 | 2017/10/30 | metastasis | metastasis | liver              | 3.62047  | 76   | 45  | 39   | 22  |
| SCC151 | 2017/8/25  | primary    | primary    | colon (descending) | 5.04885  | 116  | 54  | 51   | 23  |
| SCC152 | 2017/10/30 | metastasis | metastasis | liver              | 3.76361  | 88   | 38  | 51   | 23  |
| SCC153 | 2014/11/19 | primary    | primary    | colon (rectum)     | 2.2124   | 54   | 19  | 39   | 13  |
| SCC154 | 2015/5/7   | metastasis | metastasis | liver              | 1.97668  | 42   | 24  | 39   | 13  |
| SCC155 | 2014/10/21 | primary    | primary    | colon (rectum)     | 3.42875  | 76   | 35  | 61   | 26  |
| SCC156 | 2014/12/22 | metastasis | metastasis | liver              | 3.69309  | 83   | 37  | 61   | 26  |
| SCC157 | 2014/11/21 | primary    | primary    | stomach            | 6.35027  | 130  | 70  | 46   | 25  |
| SCC158 | 2016/2/1   | metastasis | metastasis | liver              | 6.71294  | 153  | 71  | 46   | 25  |
| SCC159 | 2015/4/22  | primary    | primary    | colon (sigmoid)    | 3.39976  | 76   | 35  | 54   | 24  |
| SCC160 | 2016/1/7   | metastasis | metastasis | liver              | 3.99433  | 82   | 52  | 54   | 24  |
| SCC161 | 2016/11/7  | primary    | primary    | colon (rectum)     | 2.9399   | 71   | 28  | 53   | 25  |
| SCC162 | 2017/1/30  | metastasis | metastasis | liver              | 2.56218  | 57   | 30  | 53   | 25  |
| SCC163 | 2017/11/15 | primary    | primary    | colon (rectum)     | 2.79219  | 62   | 32  | 38   | 19  |
| SCC164 | 2018/1/15  | metastasis | metastasis | liver              | 3.34627  | 80   | 33  | 38   | 19  |
| SCC165 | 2014/8/22  | primary    | primary    | lung               | 3.07476  | 60   | 37  | 37   | 19  |
| SCC166 | 2016/7/12  | metastasis | metastasis | brain (cerebrum)   | 3.57324  | 78   | 41  | 37   | 19  |
| SCC167 | 2015/6/8   | primary    | primary    | colon (sigmoid)    | 2.41629  | 56   | 23  | 30   | 17  |
| SCC168 | 2015/6/8   | metastasis | metastasis | liver              | 2.03555  | 41   | 27  | 30   | 17  |
| SCC169 | 2017/4/7   | primary    | primary    | colon (descending) | 2.2358   | 47   | 29  | 34   | 25  |
| SCC170 | 2017/6/23  | metastasis | metastasis | liver              | 3.29933  | 63   | 48  | 34   | 25  |
| SCC171 | 2017/4/4   | primary    | primary    | skin (thigh)       | 0.264405 | 3    | 6   | 0    | 0   |
| SCC172 | 2017/4/4   | metastasis | metastasis | lymph node         | 0.83021  | 15   | 13  | 0    | 0   |
| SCC173 | 2016/3/30  | primary    | primary    | colon (ascending)  | 3.41859  | 70   | 44  | 55   | 29  |
| SCC174 | 2016/5/16  | metastasis | metastasis | liver              | 3.16286  | 68   | 38  | 55   | 29  |
| SCC175 | 2015/1/30  | primary    | primary    | colon (rectum)     | 3.20344  | 58   | 48  | 45   | 39  |
| SCC176 | 2016/2/22  | metastasis | metastasis | liver              | 4.80561  | 97   | 65  | 45   | 39  |
| SCC177 | 2016/8/18  | primary    | primary    | colon (sigmoid)    | 0.303213 | 7    | 3   | 2    | 0   |
| SCC178 | 2016/9/29  | metastasis | metastasis | liver              | 2.52948  | 57   | 26  | 2    | 0   |
| SCC179 | 2015/2/16  | primary    | primary    | stomach            | 4.11791  | 100  | 33  | 81   | 25  |
| SCC180 | 2015/2/16  | metastasis | metastasis | liver              | 4.70373  | 109  | 45  | 81   | 25  |
| SCC181 | 2015/9/14  | primary    | primary    | colon (rectum)     | 0.060417 | 2    | 0   | 0    | 0   |
| SCC182 | 2016/5/12  | metastasis | metastasis | liver              | 3.38099  | 71   | 40  | 0    | 0   |
| SCC183 | 2015/12/22 | primary    | primary    | colon (rectum)     | 2.70719  | 61   | 31  | 50   | 20  |
| SCC184 | 2016/2/29  | metastasis | metastasis | liver              | 3.05874  | 72   | 31  | 50   | 20  |
| SCC185 | 2017/3/10  | primary    | primary    | colon (cecum)      | 2.68613  | 55   | 36  | 39   | 19  |
| SCC186 | 2017/5/24  | metastasis | metastasis | liver              | 3.35732  | 71   | 42  | 39   | 19  |
| SCC187 | 2016/4/8   | primary    | primary    | colon (sigmoid)    | 1.732    | 34   | 24  | 28   | 16  |
| SCC188 | 2016/5/19  | metastasis | metastasis | liver              | 6.8701   | 158  | 68  | 28   | 16  |
| SCC189 | 2015/9/17  | primary    | primary    | colon (rectum)     | 6.69629  | 150  | 72  | 8    | 3   |
| SCC190 | 2015/11/11 | metastasis | metastasis | liver              | 3.9708   | 86   | 45  | 8    | 3   |
| SCC191 | 2014/2/21  | primary    | primary    | soft tissue (foot) | 1.43492  | 29   | 16  | 24   | 9   |
| SCC192 | 2014/8/15  | metastasis | metastasis | lung               | 1.42189  | 31   | 14  | 24   | 9   |
| SCC193 | 2017/7/6   | primary    | primary    | colon (rectum)     | 3.19767  | 66   | 42  | 38   | 33  |

|        |            |            |            |                              |          |     |     |     |     |
|--------|------------|------------|------------|------------------------------|----------|-----|-----|-----|-----|
| SCC194 | 2017/9/4   | metastasis | metastasis | liver                        | 3.36761  | 60  | 52  | 38  | 33  |
| SCC195 | 2014/10/9  | primary    | primary    | colon (rectum)               | 2.14764  | 41  | 27  | 38  | 21  |
| SCC196 | 2016/6/20  | metastasis | metastasis | liver                        | 2.94949  | 64  | 34  | 38  | 21  |
| SCC197 | 2015/8/11  | primary    | primary    | soft tissue (abdominal wall) | 0.153357 | 3   | 2   | 0   | 0   |
| SCC198 | 2017/8/31  | metastasis | metastasis | lung                         | 1.33133  | 33  | 12  | 0   | 0   |
| SCC199 | 2016/5/13  | primary    | primary    | colon (ascending)            | 2.79185  | 54  | 38  | 33  | 21  |
| SCC200 | 2016/6/30  | metastasis | metastasis | liver                        | 3.82813  | 81  | 43  | 33  | 21  |
| SCC201 | 2015/2/19  | primary    | primary    | colon (rectum)               | 2.41417  | 54  | 24  | 48  | 21  |
| SCC202 | 2015/5/18  | metastasis | metastasis | liver                        | 4.74458  | 101 | 54  | 48  | 21  |
| SCC203 | 2016/1/29  | primary    | primary    | colon (rectum)               | 3.1684   | 71  | 36  | 59  | 30  |
| SCC204 | 2017/2/6   | metastasis | metastasis | liver                        | 5.08089  | 120 | 53  | 59  | 30  |
| SCC205 | 2017/4/3   | primary    | primary    | colon (rectum)               | 2.49678  | 57  | 28  | 41  | 21  |
| SCC206 | 2017/6/7   | metastasis | metastasis | liver                        | 2.97521  | 65  | 34  | 41  | 21  |
| SCC207 | 2014/7/9   | primary    | primary    | colon (cecum)                | 2.25824  | 48  | 24  | 26  | 16  |
| SCC208 | 2015/3/24  | metastasis | metastasis | liver                        | 2.04166  | 40  | 27  | 26  | 16  |
| SCC209 | 2014/8/19  | primary    | primary    | liver                        | 0.030573 | 0   | 1   | 0   | 0   |
| SCC210 | 2015/2/2   | metastasis | metastasis | spleen                       | 5.1126   | 113 | 58  | 0   | 0   |
| SCC211 | 2016/2/26  | primary    | primary    | colon (sigmoid)              | 4.11854  | 90  | 49  | 68  | 37  |
| SCC212 | 2016/4/28  | metastasis | metastasis | liver                        | 3.95925  | 82  | 47  | 68  | 37  |
| SCC213 | 2016/12/16 | primary    | primary    | colon (rectum)               | 2.78225  | 64  | 30  | 42  | 20  |
| SCC214 | 2017/12/6  | metastasis | metastasis | liver                        | 2.33014  | 55  | 28  | 42  | 20  |
| SCC215 | 2017/1/5   | primary    | primary    | colon (rectum)               | 3.25316  | 72  | 34  | 46  | 22  |
| SCC216 | 2017/8/30  | metastasis | metastasis | liver                        | 3.00836  | 65  | 37  | 46  | 22  |
| SCC217 | 2016/8/26  | primary    | primary    | colon (cecum)                | 0.216348 | 5   | 2   | 0   | 0   |
| SCC218 | 2016/10/5  | metastasis | metastasis | liver                        | 2.44891  | 49  | 31  | 0   | 0   |
| SCC219 | 2016/6/16  | primary    | primary    | colon (rectum)               | 4.25312  | 97  | 42  | 58  | 24  |
| SCC220 | 2018/1/22  | metastasis | metastasis | liver                        | 4.14305  | 96  | 46  | 58  | 24  |
| SCC221 | 2017/6/1   | primary    | primary    | colon (sigmoid)              | 3.11777  | 62  | 44  | 45  | 28  |
| SCC222 | 2017/8/1   | metastasis | metastasis | liver                        | 3.05073  | 66  | 37  | 45  | 28  |
| SCC223 | 2015/6/15  | primary    | primary    | colon (ascending)            | 4.36865  | 96  | 51  | 77  | 40  |
| SCC224 | 2016/8/15  | metastasis | metastasis | lung                         | 4.45646  | 96  | 53  | 77  | 40  |
| SCC225 | 2014/8/20  | primary    | primary    | colon (sigmoid)              | 3.61697  | 73  | 44  | 60  | 40  |
| SCC226 | 2015/2/4   | metastasis | metastasis | lung                         | 3.97337  | 85  | 49  | 60  | 40  |
| SCC227 | 2016/7/13  | primary    | primary    | colon (rectum)               | 4.72654  | 99  | 59  | 47  | 32  |
| SCC228 | 2016/9/1   | metastasis | metastasis | liver                        | 3.50048  | 69  | 45  | 47  | 32  |
| SCC229 | 2014/4/17  | primary    | primary    | lung                         | 0.465342 | 7   | 8   | 3   | 2   |
| SCC230 | 2016/2/15  | metastasis | metastasis | lung                         | 0.772472 | 16  | 10  | 3   | 2   |
| SCC231 | 2015/10/7  | primary    | primary    | thymus                       | 1.14073  | 27  | 11  | 13  | 5   |
| SCC232 | 2016/10/20 | metastasis | metastasis | peritoneum                   | 1.0585   | 21  | 14  | 13  | 5   |
| SCC233 | 2016/11/11 | primary    | primary    | colon (sigmoid)              | 3.67316  | 89  | 34  | 67  | 21  |
| SCC234 | 2016/12/19 | metastasis | metastasis | liver                        | 4.10306  | 102 | 35  | 67  | 21  |
| SCC235 | 2017/3/22  | primary    | primary    | colon (ascending)            | 2.95935  | 65  | 33  | 37  | 16  |
| SCC236 | 2017/5/1   | metastasis | metastasis | liver                        | 4.52616  | 98  | 56  | 37  | 16  |
| SCC237 | 2016/2/26  | primary    | primary    | colon (rectum)               | 2.97427  | 67  | 32  | 34  | 15  |
| SCC238 | 2016/4/19  | metastasis | metastasis | liver                        | 2.1077   | 46  | 25  | 34  | 15  |
| SCC239 | 2015/7/9   | primary    | primary    | stomach                      | 0.640632 | 13  | 8   | 11  | 3   |
| SCC240 | 2015/7/9   | metastasis | metastasis | liver                        | 3.27629  | 77  | 31  | 11  | 3   |
| SCC241 | 2015/10/14 | primary    | primary    | colon (sigmoid)              | 4.28698  | 96  | 46  | 89  | 42  |
| SCC242 | 2015/12/17 | metastasis | metastasis | liver                        | 5.12421  | 115 | 59  | 89  | 42  |
| SCC243 | 2016/9/15  | primary    | primary    | lung                         | 6.20469  | 141 | 64  | 128 | 54  |
| SCC244 | 2018/1/12  | metastasis | metastasis | brain (cerebrum)             | 7.439    | 170 | 78  | 128 | 54  |
| SCC245 | 2016/2/15  | primary    | primary    | colon (rectum)               | 3.46388  | 73  | 44  | 51  | 28  |
| SCC246 | 2016/3/18  | metastasis | metastasis | liver                        | 3.37903  | 75  | 40  | 51  | 28  |
| SCC247 | 2015/1/7   | primary    | primary    | colon (descending)           | 3.74063  | 82  | 41  | 75  | 34  |
| SCC248 | 2015/1/7   | metastasis | metastasis | liver                        | 3.63237  | 78  | 42  | 75  | 34  |
| SCC249 | 2014/5/30  | primary    | primary    | colon (rectum)               | 1.5344   | 34  | 11  | 29  | 9   |
| SCC250 | 2014/7/31  | metastasis | metastasis | liver                        | 4.22762  | 86  | 44  | 29  | 9   |
| SCC251 | 2014/3/28  | primary    | primary    | colon (rectum)               | 4.82063  | 95  | 58  | 68  | 42  |
| SCC252 | 2016/6/2   | metastasis | metastasis | liver                        | 5.89408  | 120 | 70  | 68  | 42  |
| SCC253 | 2014/6/4   | primary    | primary    | colon (rectum)               | 2.42539  | 47  | 25  | 39  | 22  |
| SCC254 | 2015/1/29  | metastasis | metastasis | lung                         | 2.65613  | 55  | 33  | 39  | 22  |
| SCC255 | 2014/3/17  | primary    | primary    | colon (cecum)                | 1.98457  | 40  | 20  | 33  | 16  |
| SCC256 | 2014/4/21  | metastasis | metastasis | liver                        | 2.93087  | 57  | 36  | 33  | 16  |
| SCC257 | 2016/12/1  | primary    | primary    | colon (rectum)               | 3.24931  | 73  | 36  | 62  | 30  |
| SCC258 | 2017/1/23  | metastasis | metastasis | liver                        | 3.3212   | 76  | 37  | 62  | 30  |
| SCC259 | 2014/5/28  | primary    | primary    | breast                       | 2.77925  | 58  | 27  | 49  | 22  |
| SCC260 | 2016/12/27 | metastasis | metastasis | brain (cerebrum)             | 6.20047  | 130 | 75  | 49  | 22  |
| SCC261 | 2015/4/10  | primary    | primary    | colon (rectum)               | 1.45574  | 29  | 18  | 21  | 10  |
| SCC262 | 2015/6/1   | metastasis | metastasis | lung                         | 1.33216  | 30  | 14  | 21  | 10  |
| SCC263 | 2017/2/20  | primary    | primary    | colon (sigmoid)              | 5.35468  | 126 | 56  | 96  | 47  |
| SCC264 | 2017/10/23 | metastasis | metastasis | liver                        | 6.4833   | 137 | 81  | 96  | 47  |
| SCC265 | 2017/8/16  | primary    | primary    | colon (sigmoid)              | 2.46644  | 58  | 25  | 46  | 19  |
| SCC266 | 2017/9/28  | metastasis | metastasis | liver                        | 2.60607  | 54  | 33  | 46  | 19  |
| SCC267 | 2016/2/4   | primary    | primary    | colon (sigmoid)              | 3.86879  | 85  | 44  | 70  | 34  |
| SCC268 | 2016/4/11  | metastasis | metastasis | liver                        | 5.12651  | 109 | 64  | 70  | 34  |
| SCC269 | 2015/8/3   | primary    | primary    | colon (anal canal)           | 3.87711  | 86  | 40  | 59  | 30  |
| SCC270 | 2015/10/5  | metastasis | metastasis | liver                        | 3.82227  | 80  | 44  | 59  | 30  |
| SCC271 | 2017/11/7  | primary    | primary    | colon (rectum)               | 2.64225  | 59  | 27  | 49  | 24  |
| SCC272 | 2017/12/20 | metastasis | metastasis | liver                        | 2.68843  | 59  | 32  | 49  | 24  |
| SCC273 | 2015/9/24  | primary    | primary    | colon (sigmoid)              | 3.90065  | 81  | 49  | 63  | 36  |
| SCC274 | 2015/11/11 | metastasis | metastasis | liver                        | 5.43725  | 115 | 63  | 63  | 36  |
| SCC275 | 2015/9/7   | primary    | primary    | colon (rectum)               | 3.34239  | 72  | 36  | 3   | 1   |
| SCC276 | 2016/1/25  | metastasis | metastasis | liver                        | 0.89454  | 21  | 9   | 3   | 1   |
| SCC277 | 2016/2/9   | primary    | primary    | duodenum                     | 0.840186 | 16  | 12  | 2   | 2   |
| SCC278 | 2016/2/9   | metastasis | metastasis | liver                        | 1.03479  | 22  | 13  | 2   | 2   |
| SCC279 | 2016/11/28 | primary    | primary    | lung                         | 20.1906  | 452 | 225 | 417 | 187 |
| SCC280 | 2017/6/5   | metastasis | metastasis | stomach                      | 19.4485  | 446 | 205 | 417 | 187 |
| SCC281 | 2017/9/6   | primary    | primary    | colon (cecum)                | 3.31015  | 75  | 37  | 60  | 27  |
| SCC282 | 2017/10/4  | metastasis | metastasis | liver                        | 4.71177  | 107 | 51  | 60  | 27  |
| SCC283 | 2015/9/11  | primary    | primary    | stomach                      | 2.65697  | 54  | 34  | 12  | 5   |
| SCC284 | 2015/9/11  | metastasis | metastasis | liver                        | 1.09006  | 21  | 14  | 12  | 5   |
| SCC285 | 2016/12/22 | primary    | primary    | colon (rectum)               | 5.01511  | 116 | 53  | 44  | 17  |
| SCC286 | 2017/2/17  | metastasis | metastasis | liver                        | 5.12827  | 118 | 55  | 44  | 17  |
| SCC287 | 2017/4/28  | primary    | primary    | colon (cecum)                | 3.93948  | 83  | 50  | 14  | 10  |
| SCC288 | 2017/6/16  | metastasis | metastasis | liver                        | 4.52423  | 82  | 70  | 14  | 10  |
| SCC289 | 2017/5/29  | primary    | primary    | colon (rectum)               | 3.37581  | 74  | 40  | 52  | 28  |
| SCC290 | 2017/7/26  | metastasis | metastasis | liver                        | 3.72471  | 77  | 48  | 52  | 28  |
| SCC291 | 2017/11/9  | primary    | primary    | colon (ascending)            | 1.58657  | 33  | 20  | 15  | 10  |

|        |                      |            |                   |          |     |    |    |    |
|--------|----------------------|------------|-------------------|----------|-----|----|----|----|
| SCC292 | 2018/2/1 metastasis  | metastasis | liver             | 4.52757  | 92  | 57 | 15 | 10 |
| SCC293 | 2014/2/10 primary    | primary    | colon (cecum)     | 2.83917  | 52  | 36 | 44 | 25 |
| SCC294 | 2014/2/10 metastasis | metastasis | liver             | 3.54591  | 68  | 46 | 44 | 25 |
| SCC295 | 2017/6/7 primary     | primary    | colon (sigmoid)   | 2.95384  | 72  | 28 | 62 | 27 |
| SCC296 | 2017/7/14 metastasis | metastasis | liver             | 4.06508  | 88  | 47 | 62 | 27 |
| SCC297 | 2015/6/16 primary    | primary    | lung              | 2.42638  | 50  | 32 | 39 | 23 |
| SCC298 | 2016/8/16 metastasis | metastasis | brain (cerebrum)  | 2.53988  | 54  | 28 | 39 | 23 |
| SCC299 | 2014/7/22 primary    | primary    | pancreas          | 0.302593 | 4   | 5  | 0  | 0  |
| SCC300 | 2015/8/12 metastasis | metastasis | lung              | 1.12807  | 22  | 15 | 0  | 0  |
| SCC301 | 2014/12/26 primary   | primary    | colon (ascending) | 4.44371  | 94  | 44 | 79 | 31 |
| SCC302 | 2015/3/3 metastasis  | metastasis | liver             | 4.00443  | 95  | 39 | 79 | 31 |
| SCC303 | 2016/7/22 primary    | primary    | liver             | 5.46896  | 117 | 65 | 0  | 0  |
| SCC304 | 2016/7/22 metastasis | metastasis | liver             | 2.63288  | 64  | 24 | 0  | 0  |
| SCC305 | 2015/2/13 primary    | primary    | colon (sigmoid)   | 3.07889  | 68  | 31 | 58 | 29 |
| SCC306 | 2015/4/1 metastasis  | metastasis | liver             | 3.61155  | 77  | 42 | 58 | 29 |
| SCC307 | 2016/3/8 primary     | primary    | colon (sigmoid)   | 2.4598   | 60  | 23 | 34 | 15 |
| SCC308 | 2016/4/18 metastasis | metastasis | liver             | 2.55735  | 55  | 31 | 34 | 15 |
