# Supplementary material for: Mutational concordance analysis provides supportive information for double cancer diagnosis
Source: PubMed Central journal article supplement (PMC7893960; doi:10.1186/s12885-021-07899-1), 2021-02-19
Supplement: 12885_2021_7899_MOESM2_ESM.pdf [file 12885_2021_7899_MOESM2_ESM.pdf]

**Mutational concordance analysis provides supportive information for  
double cancer diagnosis**

Keiichi Hatakeyama, Takeshi Nagashima, Akifumi Notsu, Keiichi Ohshima, Sumiko  
Ohnami, Shumpei Ohnami, Yuji Shimoda, Akane Naruoka, Koji Maruyama, Akira Iizuka,  
Tadashi Ashizawa, Hirotsugu Kenmotsu, Tohru Mochizuki, Kenichi Urakami, Yasuto  
Akiyama and Ken Yamaguchi

Table S2 Somatic mutation list identified in this study

| Gene symbol | chromosome | Position/Ref//Var   | mutation type | double cancer | metastasis |
|-------------|------------|---------------------|---------------|---------------|------------|
| KRAS        | chr12      | 25398284/C//A       | nonsynonymous | 4             | 16         |
| KRAS        | chr12      | 25398284/C//T       | nonsynonymous | 0             | 20         |
| KRAS        | chr12      | 25398285/C//A       | nonsynonymous | 4             | 11         |
| APC         | chr5       | 112175639/C//T      | nonsynonymous | 2             | 11         |
| PIK3CA      | chr3       | 178936091/G//A      | nonsynonymous | 3             | 10         |
| TP53        | chr17      | 7577120/C//T        | nonsynonymous | 2             | 11         |
| KRAS        | chr12      | 25398281/C//T       | nonsynonymous | 2             | 8          |
| CDC27       | chr17      | 45266610/T//G       | synonymous    | 1             | 9          |
| APC         | chr5       | 112173917/C//T      | nonsynonymous | 1             | 8          |
| TP53        | chr17      | 7578212/G//A        | nonsynonymous | 1             | 8          |
| APC         | chr5       | 112175211/TAAAAG//T | nonsynonymous | 0             | 9          |
| APC         | chr5       | 112175348/G//T      | nonsynonymous | 2             | 6          |
| KRAS        | chr12      | 25398285/C//T       | nonsynonymous | 0             | 8          |
| TP53        | chr17      | 7577538/C//T        | nonsynonymous | 1             | 6          |
| TP53        | chr17      | 7577539/G//A        | nonsynonymous | 0             | 7          |
| TP53        | chr17      | 7577548/C//T        | nonsynonymous | 2             | 5          |
| PCBP1       | chr2       | 70315174/T//A       | nonsynonymous | 0             | 6          |
| APC         | chr5       | 112151204/C//T      | nonsynonymous | 2             | 4          |
| TP53        | chr17      | 7577094/G//A        | nonsynonymous | 0             | 6          |
| CDC27       | chr17      | 45214544/T//C       | synonymous    | 0             | 6          |
| CDC27       | chr17      | 45219255/A//G       | synonymous    | 0             | 6          |
| CDC27       | chr17      | 45219276/A//G       | synonymous    | 0             | 6          |
| POTEC       | chr18      | 14543057/T//G       | nonsynonymous | 1             | 5          |
| PLEC        | chr8       | 144995427/A//G      | synonymous    | 0             | 6          |
| APC         | chr5       | 112128143/C//T      | nonsynonymous | 0             | 6          |
| HIST1H2AE   | chr6       | 26217526/C//T       | synonymous    | 2             | 4          |
| TP53        | chr17      | 7574003/G//A        | nonsynonymous | 0             | 6          |
| TP53        | chr17      | 7577121/G//A        | nonsynonymous | 3             | 2          |
| PIK3CA      | chr3       | 178936082/G//A      | nonsynonymous | 1             | 4          |
| BAGE3       | chr21      | 11049592/C//T       | synonymous    | 0             | 5          |
| CDC27       | chr17      | 45214582/A//G       | synonymous    | 0             | 5          |
| FBXW7       | chr4       | 153249385/G//A      | nonsynonymous | 1             | 4          |
| APC         | chr5       | 112174631/C//T      | nonsynonymous | 1             | 4          |
| PLEC        | chr8       | 144995388/T//C      | synonymous    | 0             | 5          |
| PLEC        | chr8       | 144995396/G//C      | nonsynonymous | 0             | 5          |
| PLEC        | chr8       | 144995466/G//A      | synonymous    | 0             | 5          |
| TPSD1       | chr16      | 1306918/C//T        | synonymous    | 1             | 4          |
| ITIH2       | chr10      | 7776987/C//T        | synonymous    | 0             | 4          |
| CDC27       | chr17      | 45266571/T//A       | synonymous    | 0             | 4          |
| APC         | chr5       | 112175426/G//T      | nonsynonymous | 0             | 4          |
|             | chr1       | 77042635/C//G       | synonymous    | 0             | 4          |
| HCFC1       | chrX       | 153220993/G//T      | nonsynonymous | 0             | 4          |
| APC         | chr5       | 112175255/G//T      | nonsynonymous | 0             | 4          |
| OBSCN       | chr1       | 228504627/C//T      | synonymous    | 0             | 4          |
| OR2M5       | chr1       | 248309230/C//T      | nonsynonymous | 0             | 4          |
| FIGN        | chr2       | 164467533/G//A      | nonsynonymous | 0             | 4          |
| TMEM132C    | chr12      | 129028565/C//T      | synonymous    | 0             | 4          |
| SOX9        | chr17      | 70119791/C//T       | nonsynonymous | 0             | 4          |
| NXF5        | chrX       | 101096868/C//T      | synonymous    | 0             | 4          |
| TP53        | chr17      | 7576897/G//A        | nonsynonymous | 0             | 4          |
| FBXW7       | chr4       | 153245446/G//A      | nonsynonymous | 0             | 4          |
| COL14A1     | chr8       | 121238908/C//T      | nonsynonymous | 0             | 4          |
| CNTNAP2     | chr7       | 147675028/G//A      | nonsynonymous | 0             | 4          |
| INF2        | chr14      | 105176511/T//C      | nonsynonymous | 3             | 1          |
| KDM6B       | chr17      | 7750989/G//C        | synonymous    | 0             | 4          |
| GLRB        | chr4       | 158065029/C//T      | synonymous    | 0             | 4          |
| ANO3        | chr11      | 26484617/C//T       | synonymous    | 0             | 4          |
| BAGE3       | chr21      | 11049584/C//T       | nonsynonymous | 0             | 4          |
| TP53        | chr17      | 7578190/T//C        | nonsynonymous | 1             | 3          |
| KCNJ10      | chr1       | 160011923/G//A      | nonsynonymous | 0             | 4          |
| TGIF1       | chr18      | 3457672/CCTTT//C    | nonsynonymous | 0             | 4          |
| QTRT2       | chr3       | 113804718/G//T      | nonsynonymous | 0             | 4          |
| APC         | chr5       | 112151184/A//G      | synonymous    | 0             | 4          |
| APC         | chr5       | 112151261/C//T      | nonsynonymous | 0             | 4          |
| PCDHB7      | chr5       | 140554081/C//T      | synonymous    | 0             | 4          |
| TP53        | chr17      | 7578263/G//A        | nonsynonymous | 1             | 3          |
| TPSD1       | chr16      | 1306921/G//A        | synonymous    | 1             | 3          |
| TPSD1       | chr16      | 1306927/C//T        | synonymous    | 1             | 3          |

|            |       |                  |               |   |   |
|------------|-------|------------------|---------------|---|---|
| CDC27      | chr17 | 45214510/C//G    | synonymous    | 0 | 4 |
| RANGAP1    | chr22 | 41650337/C//T    | nonsynonymous | 0 | 4 |
| APC        | chr5  | 112175576/C//T   | nonsynonymous | 0 | 4 |
| PLEC       | chr8  | 144995457/C//G   | synonymous    | 1 | 3 |
| CAPN12     | chr19 | 39226927/T//C    | nonsynonymous | 0 | 4 |
| CD93       | chr20 | 23065344/G//A    | nonsynonymous | 0 | 4 |
| SMAD4      | chr18 | 48591904/C//T    | nonsynonymous | 0 | 4 |
|            | chr4  | 26322448/A//C    | synonymous    | 1 | 2 |
| KRTAP10-11 | chr21 | 46066636/G//A    | synonymous    | 2 | 1 |
| MEP1A      | chr6  | 46806766/G//A    | nonsynonymous | 1 | 2 |
| KCNH4      | chr17 | 40318310/C//A    | synonymous    | 0 | 3 |
| ATXN2L     | chr16 | 28848110/G//T    | synonymous    | 0 | 3 |
| COL20A1    | chr20 | 61951636/G//A    | synonymous    | 1 | 2 |
| PLCH2      | chr1  | 2429964/G//A     | nonsynonymous | 0 | 3 |
| CTNNB1     | chr3  | 41266113/C//T    | nonsynonymous | 1 | 2 |
| LAMB2      | chr3  | 49163400/G//A    | nonsynonymous | 1 | 2 |
| DOCK3      | chr3  | 51315142/C//T    | nonsynonymous | 0 | 3 |
| KIAA1549   | chr7  | 138545904/G//A   | nonsynonymous | 0 | 3 |
| GAPVD1     | chr9  | 128064536/C//T   | nonsynonymous | 1 | 2 |
| GDPD5      | chr11 | 75146556/C//T    | nonsynonymous | 0 | 3 |
| KRAS       | chr12 | 25380283/C//T    | nonsynonymous | 1 | 2 |
| COL6A1     | chr21 | 47423400/C//T    | nonsynonymous | 1 | 2 |
| SPTA1      | chr1  | 158623113/G//A   | nonsynonymous | 0 | 3 |
| FAM90A1    | chr12 | 8374605/C//T     | nonsynonymous | 1 | 2 |
| PIK3CA     | chr3  | 178928079/G//A   | nonsynonymous | 1 | 2 |
| POTEE      | chr2  | 132021599/C//T   | synonymous    | 1 | 2 |
| OTOGL      | chr12 | 80771719/G//A    | nonsynonymous | 1 | 2 |
| TMEM8B     | chr9  | 35853671/C//T    | nonsynonymous | 1 | 2 |
| FLG        | chr1  | 152285238/A//G   | synonymous    | 1 | 2 |
| KRTAP10-6  | chr21 | 46012360/G//A    | synonymous    | 1 | 2 |
| PCDHA6     | chr5  | 140209359/C//T   | synonymous    | 0 | 3 |
| PCDH17     | chr13 | 58208417/C//T    | synonymous    | 0 | 3 |
| KRAS       | chr12 | 25378562/C//T    | nonsynonymous | 1 | 2 |
| ZNF717     | chr3  | 75787186/C//T    | nonsynonymous | 0 | 3 |
| CDC27      | chr17 | 45216231/T//C    | synonymous    | 0 | 3 |
| KCNC1      | chr11 | 17758115/C//T    | nonsynonymous | 2 | 1 |
| C8orf22    | chr8  | 49987926/C//A    | synonymous    | 1 | 2 |
| FBXW7      | chr4  | 153250883/G//A   | nonsynonymous | 1 | 2 |
| SATB2      | chr2  | 200173527/C//T   | nonsynonymous | 0 | 3 |
| PIK3CA     | chr3  | 178916876/G//A   | nonsynonymous | 0 | 3 |
| ANP32C     | chr4  | 165118820/G//A   | nonsynonymous | 0 | 3 |
| POTEC      | chr18 | 14543098/C//T    | synonymous    | 0 | 3 |
| OR7D2      | chr19 | 9296570/C//T     | nonsynonymous | 0 | 3 |
| TP53       | chr17 | 7577559/G//T     | nonsynonymous | 0 | 3 |
| ZNF814     | chr19 | 58385426/A//T    | synonymous    | 0 | 3 |
| ZNF814     | chr19 | 58385442/T//C    | nonsynonymous | 0 | 3 |
| LRFN1      | chr19 | 39804645/G//T    | synonymous    | 1 | 2 |
| ADARB2     | chr10 | 1405429/G//A     | nonsynonymous | 0 | 3 |
| RYR1       | chr19 | 39008210/C//T    | synonymous    | 0 | 3 |
| CDC27      | chr17 | 45216141/T//G    | synonymous    | 0 | 3 |
| CDC27      | chr17 | 45216210/A//G    | synonymous    | 0 | 3 |
| CDC27      | chr17 | 45216216/A//G    | synonymous    | 0 | 3 |
| CDC27      | chr17 | 45219309/A//G    | synonymous    | 0 | 3 |
| CSMD1      | chr8  | 2857618/C//T     | nonsynonymous | 1 | 2 |
| GPR132     | chr14 | 105517426/G//C   | nonsynonymous | 0 | 3 |
| CNN2       | chr19 | 1037679/C//T     | nonsynonymous | 1 | 2 |
| CNN2       | chr19 | 1037681/G//A     | nonsynonymous | 1 | 2 |
| SLAMF6     | chr1  | 160456412/A//G   | synonymous    | 0 | 3 |
| PTK2B      | chr8  | 27291021/C//T    | nonsynonymous | 1 | 2 |
| CNTNAP4    | chr16 | 76482757/G//A    | nonsynonymous | 0 | 3 |
| LHPP       | chr10 | 126176971/G//GTC | synonymous    | 1 | 2 |
| ZNF595     | chr4  | 53360/C//G       | synonymous    | 0 | 3 |
| TPTE       | chr21 | 10959806/G//T    | synonymous    | 2 | 1 |
| AMER1      | chrX  | 63412095/G//A    | nonsynonymous | 1 | 2 |
| TP53       | chr17 | 7577551/C//T     | nonsynonymous | 0 | 3 |
| SDR9C7     | chr12 | 57323196/G//A    | synonymous    | 0 | 3 |
| FAM196B    | chr5  | 169310626/G//A   | nonsynonymous | 0 | 3 |
| IRX4       | chr5  | 1879887/G//A     | nonsynonymous | 0 | 3 |
| MS4A15     | chr11 | 60540955/C//T    | nonsynonymous | 1 | 2 |
| DDB1       | chr11 | 61099067/T//C    | nonsynonymous | 0 | 3 |

|                |       |                 |               |   |   |
|----------------|-------|-----------------|---------------|---|---|
| PLG            | chr6  | 161135860/C//T  | synonymous    | 0 | 3 |
| MEX3A          | chr1  | 156046781/C//A  | nonsynonymous | 0 | 3 |
| PAX4           | chr7  | 127255505/G//A  | nonsynonymous | 0 | 3 |
| APC            | chr5  | 112175328/C//A  | nonsynonymous | 1 | 2 |
| EPHA10         | chr1  | 38201002/G//T   | nonsynonymous | 0 | 2 |
| CHRNA2         | chr1  | 154543824/G//A  | synonymous    | 0 | 2 |
| INSRR          | chr1  | 156821096/G//A  | synonymous    | 0 | 2 |
| RCOR3          | chr1  | 211444638/C//G  | nonsynonymous | 0 | 2 |
| EHD3           | chr2  | 31483550/C//T   | nonsynonymous | 0 | 2 |
| SLC9A4         | chr2  | 103130668/AG//A | nonsynonymous | 0 | 2 |
| TTN            | chr2  | 179640287/C//T  | nonsynonymous | 0 | 2 |
| TNS1           | chr2  | 218683202/G//A  | nonsynonymous | 0 | 2 |
| ATG16L1        | chr2  | 234200896/G//A  | nonsynonymous | 0 | 2 |
| SRGAP3         | chr3  | 9055479/C//T    | nonsynonymous | 0 | 2 |
| NBEAL2         | chr3  | 47036753/G//A   | nonsynonymous | 0 | 2 |
| FOXP1          | chr3  | 71101777/G//A   | nonsynonymous | 0 | 2 |
| TF             | chr3  | 133485259/A//C  | nonsynonymous | 0 | 2 |
| ZBTB49         | chr4  | 4323071/G//A    | synonymous    | 0 | 2 |
| FAT4           | chr4  | 126370617/C//A  | nonsynonymous | 0 | 2 |
| TRIML2         | chr4  | 189012848/C//T  | synonymous    | 0 | 2 |
| HTR1A          | chr5  | 63257100/C//T   | synonymous    | 0 | 2 |
| PIK3R1         | chr5  | 67589028/G//A   | nonsynonymous | 0 | 2 |
| POU5F2         | chr5  | 93076993/G//A   | nonsynonymous | 0 | 2 |
| CDC25C         | chr5  | 137666841/C//G  | nonsynonymous | 0 | 2 |
| PCDHA3         | chr5  | 140182272/G//A  | nonsynonymous | 0 | 2 |
| CDYL           | chr6  | 4892459/C//T    | synonymous    | 0 | 2 |
| COL11A2        | chr6  | 33133517/C//T   | nonsynonymous | 0 | 2 |
| PTCHD4         | chr6  | 47847083/C//T   | synonymous    | 0 | 2 |
|                | chr7  | 32209485/C//A   | synonymous    | 0 | 2 |
| URGCP          | chr7  | 43916971/G//A   | synonymous    | 0 | 2 |
| ZNF655         | chr7  | 99170615/A//G   | nonsynonymous | 0 | 2 |
| RELN           | chr7  | 103138555/C//A  | nonsynonymous | 0 | 2 |
| TRPV5          | chr7  | 142622807/C//G  | synonymous    | 0 | 2 |
| CNTNAP2        | chr7  | 147092836/C//T  | nonsynonymous | 0 | 2 |
| CSMD1          | chr8  | 2855561/C//T    | synonymous    | 0 | 2 |
| PKHD1L1        | chr8  | 110498978/G//A  | nonsynonymous | 0 | 2 |
|                | chr9  | 85858022/C//T   | synonymous    | 0 | 2 |
| CACNA1B        | chr9  | 140878665/C//T  | nonsynonymous | 0 | 2 |
| MLLT10         | chr10 | 21827815/G//T   | nonsynonymous | 0 | 2 |
| MLLT10         | chr10 | 21962662/G//T   | nonsynonymous | 0 | 2 |
|                | chr10 | 22701422/G//A   | synonymous    | 0 | 2 |
| RHOBTB1        | chr10 | 62671228/C//T   | nonsynonymous | 0 | 2 |
| TET1           | chr10 | 70450959/G//A   | synonymous    | 0 | 2 |
| UBTD1          | chr10 | 99330294/C//A   | synonymous    | 0 | 2 |
| HPS1           | chr10 | 100190958/C//A  | nonsynonymous | 0 | 2 |
| C10orf91       | chr10 | 134261320/T//A  | nonsynonymous | 0 | 2 |
| DCHS1          | chr11 | 6646598/C//A    | nonsynonymous | 0 | 2 |
| C12orf4        | chr12 | 4645224/C//T    | nonsynonymous | 0 | 2 |
| GALNT8         | chr12 | 4854666/G//A    | nonsynonymous | 0 | 2 |
| DENND5B        | chr12 | 31600643/T//C   | nonsynonymous | 0 | 2 |
| FZD10          | chr12 | 130648325/C//T  | nonsynonymous | 0 | 2 |
| LIG4           | chr13 | 108861526/C//T  | synonymous    | 0 | 2 |
| AHNAK2         | chr14 | 105404488/G//A  | nonsynonymous | 0 | 2 |
| ATP10A         | chr15 | 26107846/C//T   | nonsynonymous | 0 | 2 |
| JMJD7-PLA2G4B  | chr15 | 42137247/C//T   | synonymous    | 0 | 2 |
| TP53BP1        | chr15 | 43699735/G//A   | nonsynonymous | 0 | 2 |
| OTOA           | chr16 | 21737848/C//T   | nonsynonymous | 0 | 2 |
| CA7            | chr16 | 66887318/G//A   | nonsynonymous | 0 | 2 |
| NFAT5          | chr16 | 69704149/T//G   | synonymous    | 0 | 2 |
| TUBB3          | chr16 | 90001664/G//A   | nonsynonymous | 0 | 2 |
| FBXL20         | chr17 | 37425075/C//G   | synonymous    | 0 | 2 |
| KIAA1468       | chr18 | 59925837/G//A   | nonsynonymous | 0 | 2 |
| TUBB4A         | chr19 | 6501414/G//A    | synonymous    | 0 | 2 |
| TSHZ3          | chr19 | 31768116/T//C   | synonymous    | 0 | 2 |
| ZNF566         | chr19 | 36940744/T//A   | nonsynonymous | 0 | 2 |
| PWP2           | chr21 | 45548209/G//A   | nonsynonymous | 0 | 2 |
| XAGE5          | chrX  | 52847228/A//G   | synonymous    | 0 | 2 |
| TGIF2LX        | chrX  | 89177717/C//T   | synonymous    | 0 | 2 |
| ARMCX5-GPRASP2 | chrX  | 101970562/G//C  | nonsynonymous | 0 | 2 |
| L1CAM          | chrX  | 153130580/G//A  | synonymous    | 0 | 2 |

|            |       |                |               |   |   |
|------------|-------|----------------|---------------|---|---|
| CTNNB1     | chr3  | 41266104/G//T  | nonsynonymous | 2 | 0 |
| GOLIM4     | chr3  | 167747615/C//A | nonsynonymous | 1 | 1 |
| DCAF8      | chr1  | 160209571/A//C | nonsynonymous | 1 | 1 |
| KRTAP9-1   | chr17 | 39346413/G//T  | nonsynonymous | 1 | 1 |
| CDK5RAP3   | chr17 | 46058835/G//C  | synonymous    | 1 | 1 |
| ZNF729     | chr19 | 22497166/C//G  | nonsynonymous | 1 | 1 |
| SFPQ       | chr1  | 35656463/T//G  | nonsynonymous | 0 | 2 |
| COL11A1    | chr1  | 103488309/T//C | nonsynonymous | 0 | 2 |
| HMCN1      | chr1  | 186024744/A//G | nonsynonymous | 0 | 2 |
| PIGR       | chr1  | 207112682/C//T | nonsynonymous | 0 | 2 |
| NVL        | chr1  | 224484239/G//A | nonsynonymous | 0 | 2 |
| OBSCN      | chr1  | 228466581/G//A | nonsynonymous | 0 | 2 |
| CAPN9      | chr1  | 230921750/T//C | nonsynonymous | 0 | 2 |
| NCOA1      | chr2  | 24928080/A//G  | nonsynonymous | 0 | 2 |
| NRXN1      | chr2  | 50780066/C//T  | nonsynonymous | 0 | 2 |
| SLC19A3    | chr2  | 228552909/T//C | synonymous    | 0 | 2 |
| USP19      | chr3  | 49153922/A//C  | synonymous    | 0 | 2 |
| P2RY12     | chr3  | 151056630/G//C | nonsynonymous | 0 | 2 |
| GK2        | chr4  | 80328689/A//C  | nonsynonymous | 0 | 2 |
| AP3B1      | chr5  | 77458740/T//A  | synonymous    | 0 | 2 |
| PCDHA7     | chr5  | 140215887/C//T | nonsynonymous | 0 | 2 |
| TECPR1     | chr7  | 97863207/C//T  | nonsynonymous | 0 | 2 |
| FUT10      | chr8  | 33230150/T//G  | nonsynonymous | 0 | 2 |
| TACC1      | chr8  | 38677246/A//G  | nonsynonymous | 0 | 2 |
| SNTG1      | chr8  | 51362279/C//A  | nonsynonymous | 0 | 2 |
| ZNF189     | chr9  | 104170803/A//C | nonsynonymous | 0 | 2 |
| AGAP5      | chr10 | 75457330/G//A  | nonsynonymous | 0 | 2 |
| MED17      | chr11 | 93545012/T//A  | synonymous    | 0 | 2 |
| SCN4B      | chr11 | 118015783/C//T | nonsynonymous | 0 | 2 |
| PAN2       | chr12 | 56722320/G//A  | nonsynonymous | 0 | 2 |
| THSD1      | chr13 | 52952405/G//A  | nonsynonymous | 0 | 2 |
| ANKRD34C   | chr15 | 79587135/G//C  | nonsynonymous | 0 | 2 |
| SELENOS    | chr15 | 101814653/T//C | synonymous    | 0 | 2 |
| MVP        | chr16 | 29855907/A//T  | synonymous    | 0 | 2 |
| ANKRD11    | chr16 | 89352579/G//A  | synonymous    | 0 | 2 |
| DHPS       | chr19 | 12787936/T//A  | nonsynonymous | 0 | 2 |
| OR7C1      | chr19 | 14910475/G//A  | synonymous    | 0 | 2 |
| MYT1       | chr20 | 62858789/C//T  | synonymous    | 0 | 2 |
| KRTAP10-11 | chr21 | 46066648/C//A  | synonymous    | 0 | 2 |
| MYH9       | chr22 | 36737424/T//C  | nonsynonymous | 0 | 2 |
| PADI2      | chr1  | 17410325/C//T  | nonsynonymous | 0 | 2 |
| KIRREL     | chr1  | 158064855/C//G | nonsynonymous | 0 | 2 |
| B3GALNT2   | chr1  | 235611649/C//T | synonymous    | 0 | 2 |
| SNTG2      | chr2  | 1320143/C//T   | nonsynonymous | 0 | 2 |
| CYP1B1     | chr2  | 38301682/G//A  | nonsynonymous | 0 | 2 |
| ZEB2       | chr2  | 145162543/C//G | nonsynonymous | 0 | 2 |
| BSN        | chr3  | 49695570/G//A  | nonsynonymous | 0 | 2 |
| PSAPL1     | chr4  | 7435401/C//A   | synonymous    | 0 | 2 |
| PACRGL     | chr4  | 20709442/G//A  | nonsynonymous | 0 | 2 |
| FBXL7      | chr5  | 15937262/C//T  | synonymous    | 0 | 2 |
| VCAN       | chr5  | 82815665/C//T  | nonsynonymous | 0 | 2 |
| IGF2BP3    | chr7  | 23401206/G//A  | synonymous    | 0 | 2 |
| NOM1       | chr7  | 156746891/G//A | nonsynonymous | 0 | 2 |
| ARFGEF1    | chr8  | 68128877/T//C  | nonsynonymous | 0 | 2 |
| ZFHX4      | chr8  | 77764890/G//A  | synonymous    | 0 | 2 |
| CSMD3      | chr8  | 113256754/C//A | nonsynonymous | 0 | 2 |
| KCNA4      | chr11 | 30034125/G//T  | nonsynonymous | 0 | 2 |
| SLC22A8    | chr11 | 62782446/C//T  | synonymous    | 0 | 2 |
| FDXACB1    | chr11 | 111745735/C//T | nonsynonymous | 0 | 2 |
| KIRREL3    | chr11 | 126333111/C//T | nonsynonymous | 0 | 2 |
| PLXNC1     | chr12 | 94543282/G//A  | nonsynonymous | 0 | 2 |
| ANKS1B     | chr12 | 100200273/C//T | nonsynonymous | 0 | 2 |
| TCP11L2    | chr12 | 106715478/T//C | nonsynonymous | 0 | 2 |
| NOVA1      | chr14 | 27064755/G//A  | synonymous    | 0 | 2 |
| KCNH5      | chr14 | 63447728/C//T  | synonymous    | 0 | 2 |
| AHNAK2     | chr14 | 105415096/C//A | nonsynonymous | 0 | 2 |
|            | chr16 | 4776826/C//T   | synonymous    | 0 | 2 |
| GTF3C1     | chr16 | 27495625/G//A  | nonsynonymous | 0 | 2 |
| ABCC12     | chr16 | 48125077/G//A  | nonsynonymous | 0 | 2 |
| DEF8       | chr16 | 90030936/C//T  | synonymous    | 0 | 2 |

|           |       |                 |               |   |   |
|-----------|-------|-----------------|---------------|---|---|
| MYO19     | chr17 | 34881161/G//C   | synonymous    | 0 | 2 |
| KRT10     | chr17 | 38976357/C//A   | nonsynonymous | 0 | 2 |
| LPIN2     | chr18 | 2931392/C//A    | nonsynonymous | 0 | 2 |
| SMAD4     | chr18 | 48593557/G//C   | nonsynonymous | 0 | 2 |
| SERPINB12 | chr18 | 61234021/G//A   | nonsynonymous | 0 | 2 |
| MUC16     | chr19 | 9064395/G//A    | nonsynonymous | 0 | 2 |
| KCNA7     | chr19 | 49573770/G//A   | synonymous    | 0 | 2 |
| TMEM150B  | chr19 | 55832377/C//T   | nonsynonymous | 0 | 2 |
| SOGA1     | chr20 | 35441193/G//A   | nonsynonymous | 0 | 2 |
| ACOT8     | chr20 | 44477307/C//T   | synonymous    | 0 | 2 |
| HELZ2     | chr20 | 62195369/G//A   | synonymous    | 0 | 2 |
| RTEL1     | chr20 | 62305429/C//T   | nonsynonymous | 0 | 2 |
| CHRD1     | chrX  | 109931971/G//T  | nonsynonymous | 0 | 2 |
| SPANXN1   | chrX  | 144337399/C//A  | synonymous    | 0 | 2 |
| HCFC1     | chrX  | 153215719/C//T  | synonymous    | 0 | 2 |
| FAM43B    | chr1  | 20879390/G//A   | synonymous    | 0 | 2 |
| CSMD2     | chr1  | 34192195/C//T   | nonsynonymous | 0 | 2 |
| LRP8      | chr1  | 53729891/GAA//G | nonsynonymous | 0 | 2 |
| LRRRC8D   | chr1  | 90401062/G//A   | nonsynonymous | 0 | 2 |
| ZNF644    | chr1  | 91405282/A//T   | nonsynonymous | 0 | 2 |
| GJA8      | chr1  | 147380211/C//T  | synonymous    | 0 | 2 |
| CTSK      | chr1  | 150769212/G//T  | synonymous    | 0 | 2 |
| PGLYRP4   | chr1  | 153312955/G//A  | synonymous    | 0 | 2 |
| C1orf27   | chr1  | 186355130/T//G  | nonsynonymous | 0 | 2 |
| BRINP3    | chr1  | 190068067/C//G  | nonsynonymous | 0 | 2 |
| TMEM206   | chr1  | 212588083/C//T  | nonsynonymous | 0 | 2 |
| OBSCN     | chr1  | 228557713/G//A  | nonsynonymous | 0 | 2 |
| ALLC      | chr2  | 3727535/G//A    | synonymous    | 0 | 2 |
| LRRTM4    | chr2  | 77746471/C//G   | nonsynonymous | 0 | 2 |
| SMYD1     | chr2  | 88387508/C//A   | synonymous    | 0 | 2 |
| IL36A     | chr2  | 113763355/A//G  | synonymous    | 0 | 2 |
| CNTN4     | chr3  | 3095610/C//T    | synonymous    | 0 | 2 |
| KLHL40    | chr3  | 42727901/G//A   | nonsynonymous | 0 | 2 |
| QRICH1    | chr3  | 49081831/G//A   | nonsynonymous | 0 | 2 |
| HGD       | chr3  | 120363212/T//C  | nonsynonymous | 0 | 2 |
| STXBPL5L  | chr3  | 120976137/G//A  | nonsynonymous | 0 | 2 |
| ZIC1      | chr3  | 147128362/T//A  | nonsynonymous | 0 | 2 |
| MCF2L2    | chr3  | 182897388/T//TC | nonsynonymous | 0 | 2 |
| DVL3      | chr3  | 183885438/A//G  | synonymous    | 0 | 2 |
| DLG1      | chr3  | 196846370/G//C  | nonsynonymous | 0 | 2 |
| JAKMIP1   | chr4  | 6066667/T//C    | synonymous    | 0 | 2 |
| ADH1C     | chr4  | 100266028/T//G  | nonsynonymous | 0 | 2 |
| ADH1C     | chr4  | 100266031/G//A  | synonymous    | 0 | 2 |
| ADH1C     | chr4  | 100266055/A//G  | synonymous    | 0 | 2 |
| TRAPPC11  | chr4  | 184605914/T//C  | nonsynonymous | 0 | 2 |
| IRX1      | chr5  | 3600203/G//A    | nonsynonymous | 0 | 2 |
| IRX1      | chr5  | 3600241/C//T    | synonymous    | 0 | 2 |
| AMACR     | chr5  | 339895111/G//A  | nonsynonymous | 0 | 2 |
| HMGCS1    | chr5  | 43294904/G//C   | nonsynonymous | 0 | 2 |
| HCN1      | chr5  | 45262314/G//T   | synonymous    | 0 | 2 |
| GZMA      | chr5  | 54401418/T//C   | nonsynonymous | 0 | 2 |
| ADAMTS6   | chr5  | 64520764/T//C   | synonymous    | 0 | 2 |
| LVRN      | chr5  | 115319118/C//A  | nonsynonymous | 0 | 2 |
|           | chr6  | 10586488/C//T   | synonymous    | 0 | 2 |
| NEDD9     | chr6  | 11190948/G//A   | nonsynonymous | 0 | 2 |
| HIST1H2BK | chr6  | 27114593/C//T   | synonymous    | 0 | 2 |
| ADGRB3    | chr6  | 69348962/G//A   | nonsynonymous | 0 | 2 |
| COL12A1   | chr6  | 75852994/T//C   | nonsynonymous | 0 | 2 |
| SASH1     | chr6  | 148865333/G//C  | nonsynonymous | 0 | 2 |
| LFNG      | chr7  | 2566474/C//G    | nonsynonymous | 0 | 2 |
| PCLO      | chr7  | 82580041/T//C   | nonsynonymous | 0 | 2 |
| C7orf34   | chr7  | 142637557/C//A  | nonsynonymous | 0 | 2 |
| OR2A25    | chr7  | 143771517/G//A  | nonsynonymous | 0 | 2 |
| ZNF596    | chr8  | 195648/A//G     | synonymous    | 0 | 2 |
| NKX2-6    | chr8  | 23563997/C//G   | nonsynonymous | 0 | 2 |
| TMEM70    | chr8  | 74888513/C//T   | synonymous    | 0 | 2 |
| FAM84B    | chr8  | 127569083/G//A  | synonymous    | 0 | 2 |
| GLIS3     | chr9  | 3898700/G//C    | nonsynonymous | 0 | 2 |
| IFNA10    | chr9  | 21207013/C//A   | nonsynonymous | 0 | 2 |
| NUTM2G    | chr9  | 99697680/C//T   | nonsynonymous | 0 | 2 |

|          |       |                |               |   |   |
|----------|-------|----------------|---------------|---|---|
| PTPN3    | chr9  | 112172532/C//T | nonsynonymous | 0 | 2 |
| OR1N1    | chr9  | 125289123/G//C | synonymous    | 0 | 2 |
| INPP5E   | chr9  | 139327015/G//A | nonsynonymous | 0 | 2 |
| LARP4B   | chr10 | 888998/C//G    | nonsynonymous | 0 | 2 |
| DHTKD1   | chr10 | 12155009/G//T  | synonymous    | 0 | 2 |
| MYOZ1    | chr10 | 75399702/C//A  | nonsynonymous | 0 | 2 |
| WAPL     | chr10 | 88203107/G//A  | synonymous    | 0 | 2 |
| ZFYVE27  | chr10 | 99517046/C//T  | nonsynonymous | 0 | 2 |
| MUC5B    | chr11 | 1262118/G//A   | synonymous    | 0 | 2 |
| LRRC55   | chr11 | 56954996/C//T  | synonymous    | 0 | 2 |
| SCYL1    | chr11 | 65293767/A//T  | nonsynonymous | 0 | 2 |
| FAT3     | chr11 | 92616069/C//T  | synonymous    | 0 | 2 |
| PKNOX2   | chr11 | 125301239/C//T | nonsynonymous | 0 | 2 |
| KRT6C    | chr12 | 52864990/C//T  | nonsynonymous | 0 | 2 |
| MYO1A    | chr12 | 57423379/C//T  | synonymous    | 0 | 2 |
| ATP2B1   | chr12 | 90049658/G//T  | synonymous    | 0 | 2 |
| POP5     | chr12 | 121019026/G//A | nonsynonymous | 0 | 2 |
| TUBA3C   | chr13 | 19748143/C//T  | nonsynonymous | 0 | 2 |
| DCLK1    | chr13 | 36428681/C//T  | synonymous    | 0 | 2 |
| CSNK1A1L | chr13 | 37678579/G//T  | nonsynonymous | 0 | 2 |
| EDNRB    | chr13 | 78492700/C//T  | synonymous    | 0 | 2 |
| ZIC2     | chr13 | 100635292/G//A | nonsynonymous | 0 | 2 |
| SPTB     | chr14 | 65241196/C//T  | nonsynonymous | 0 | 2 |
| UNC79    | chr14 | 94088370/A//G  | synonymous    | 0 | 2 |
| DYNC1H1  | chr14 | 102516145/A//G | nonsynonymous | 0 | 2 |
| GABRG3   | chr15 | 27777790/C//A  | synonymous    | 0 | 2 |
| SLC12A1  | chr15 | 48539603/C//G  | nonsynonymous | 0 | 2 |
| CSPG4    | chr15 | 75982669/C//T  | nonsynonymous | 0 | 2 |
| WFIKKN1  | chr16 | 683835/C//G    | synonymous    | 0 | 2 |
| ABCC11   | chr16 | 48239437/G//A  | synonymous    | 0 | 2 |
| CNGB1    | chr16 | 57991262/A//G  | nonsynonymous | 0 | 2 |
| DHX8     | chr17 | 41598247/G//A  | synonymous    | 0 | 2 |
| FZD2     | chr17 | 42636513/T//C  | nonsynonymous | 0 | 2 |
| ITGB3    | chr17 | 45376687/C//A  | nonsynonymous | 0 | 2 |
| COL1A1   | chr17 | 48275858/G//A  | nonsynonymous | 0 | 2 |
| PDE6G    | chr17 | 79618097/C//T  | synonymous    | 0 | 2 |
| GPS1     | chr17 | 80013953/G//A  | nonsynonymous | 0 | 2 |
| PTPRM    | chr18 | 8394498/G//A   | synonymous    | 0 | 2 |
| PCSK4    | chr19 | 1483395/G//A   | nonsynonymous | 0 | 2 |
| ZNF729   | chr19 | 22499415/C//T  | nonsynonymous | 0 | 2 |
| RELB     | chr19 | 45540730/C//T  | synonymous    | 0 | 2 |
| SYT3     | chr19 | 51133064/G//A  | nonsynonymous | 0 | 2 |
| KIR2DL4  | chr19 | 55316507/C//A  | nonsynonymous | 0 | 2 |
| PEG3     | chr19 | 57335705/G//A  | nonsynonymous | 0 | 2 |
| BPIFA2   | chr20 | 31761975/G//A  | synonymous    | 0 | 2 |
| BRWD1    | chr21 | 40568642/G//A  | nonsynonymous | 0 | 2 |
| GGT5     | chr22 | 24622072/C//T  | nonsynonymous | 0 | 2 |
| TCF20    | chr22 | 42610387/T//A  | nonsynonymous | 0 | 2 |
| CELSR1   | chr22 | 46859820/G//T  | synonymous    | 0 | 2 |
| ZRSR2    | chrX  | 15833854/C//T  | synonymous    | 0 | 2 |
| DACH2    | chrX  | 86067981/G//A  | nonsynonymous | 0 | 2 |
| NXF3     | chrX  | 102335091/C//T | synonymous    | 0 | 2 |
| AGTR2    | chrX  | 115304168/C//A | nonsynonymous | 0 | 2 |
| NSDHL    | chrX  | 152037638/G//A | nonsynonymous | 0 | 2 |
| ZNF208   | chr19 | 22155980/C//A  | nonsynonymous | 1 | 1 |
| NBR1     | chr17 | 41332806/T//C  | synonymous    | 1 | 1 |
| DNM3     | chr1  | 172100387/G//A | nonsynonymous | 0 | 2 |
| NRXN1    | chr2  | 50692579/C//T  | nonsynonymous | 0 | 2 |
| LRRFIP2  | chr3  | 37114363/C//T  | nonsynonymous | 0 | 2 |
| HESX1    | chr3  | 57233833/T//G  | nonsynonymous | 0 | 2 |
| DOCK2    | chr5  | 169230209/C//T | nonsynonymous | 0 | 2 |
| EYS      | chr6  | 65300609/T//A  | synonymous    | 0 | 2 |
| TRDN     | chr6  | 123539760/G//T | nonsynonymous | 0 | 2 |
| NPSR1    | chr7  | 34867074/C//A  | synonymous    | 0 | 2 |
| CYP11B1  | chr8  | 143957293/G//A | nonsynonymous | 0 | 2 |
| ZNHIT2   | chr11 | 64885081/G//A  | synonymous    | 0 | 2 |
| MRGPRF   | chr11 | 68773040/G//A  | synonymous    | 0 | 2 |
| NECTIN1  | chr11 | 119548403/G//A | nonsynonymous | 0 | 2 |
| VWA5A    | chr11 | 124012438/G//A | synonymous    | 0 | 2 |
| DCT      | chr13 | 95121241/G//A  | synonymous    | 0 | 2 |

|           |       |                           |               |   |   |
|-----------|-------|---------------------------|---------------|---|---|
| RASGRP1   | chr15 | 38803840/C//A             | nonsynonymous | 0 | 2 |
| ITPRIPL2  | chr16 | 19126678/G//A             | nonsynonymous | 0 | 2 |
| PDPR      | chr16 | 70187366/G//A             | nonsynonymous | 0 | 2 |
| ZFH3      | chr16 | 72828961/C//T             | synonymous    | 0 | 2 |
| PIK3R5    | chr17 | 8793353/G//A              | nonsynonymous | 0 | 2 |
| KIF18B    | chr17 | 43005433/G//A             | nonsynonymous | 0 | 2 |
| ELAVL1    | chr19 | 8028423/G//A              | nonsynonymous | 0 | 2 |
| OLFM2     | chr19 | 9965137/C//T              | nonsynonymous | 0 | 2 |
| ZNF799    | chr19 | 12501526/A//G             | synonymous    | 0 | 2 |
| ASPHD2    | chr22 | 26830286/T//C             | synonymous    | 0 | 2 |
| GCNT3     | chr15 | 59911157/C//A             | synonymous    | 0 | 2 |
| NGRN      | chr15 | 90814933/A//G             | synonymous    | 0 | 2 |
| SIRT7     | chr17 | 79871660/C//T             | nonsynonymous | 0 | 2 |
| SAFB2     | chr19 | 5613522/A//C              | nonsynonymous | 0 | 2 |
| HNRNPCL4  | chr1  | 12907296/C//T             | nonsynonymous | 0 | 2 |
| ZNF845    | chr19 | 53855052/A//G             | nonsynonymous | 1 | 1 |
| PIK3CD    | chr1  | 9776641/GTACCTGTATGGCAGC  | nonsynonymous | 0 | 2 |
| MTRF1L    | chr1  | 26150240/G//C             | nonsynonymous | 0 | 2 |
| HFM1      | chr1  | 91731617/G//C             | nonsynonymous | 0 | 2 |
| LMX1A     | chr1  | 165173110/GGAAGACTCAAGATC | nonsynonymous | 0 | 2 |
| PPFIA4    | chr1  | 203023000/G//A            | synonymous    | 0 | 2 |
| SNTG2     | chr2  | 1320048/G//T              | nonsynonymous | 0 | 2 |
| CRIP1     | chr2  | 46850992/G//C             | nonsynonymous | 0 | 2 |
| MDH1      | chr2  | 63831904/G//C             | nonsynonymous | 0 | 2 |
| REEP1     | chr2  | 86459917/A//G             | synonymous    | 0 | 2 |
| NMI       | chr2  | 152132380/T//C            | nonsynonymous | 0 | 2 |
| LRP2      | chr2  | 169995844/G//T            | synonymous    | 0 | 2 |
| DUSP19    | chr2  | 183943507/G//C            | synonymous    | 0 | 2 |
| CALCRL    | chr2  | 188248026/C//A            | nonsynonymous | 0 | 2 |
| CDK5R2    | chr2  | 219825321/C//A            | nonsynonymous | 0 | 2 |
| SPEG      | chr2  | 220338298/C//G            | nonsynonymous | 0 | 2 |
| TBC1D5    | chr3  | 17549971/G//C             | nonsynonymous | 0 | 2 |
| SLC25A38  | chr3  | 39431042/C//T             | synonymous    | 0 | 2 |
| COL7A1    | chr3  | 48616686/C//A             | nonsynonymous | 0 | 2 |
| ITIH1     | chr3  | 52820346/T//C             | synonymous    | 0 | 2 |
| ADCY5     | chr3  | 123166599/G//C            | nonsynonymous | 0 | 2 |
| EPHB3     | chr3  | 184295786/C//T            | synonymous    | 0 | 2 |
| FAM160A1  | chr4  | 152499004/T//C            | nonsynonymous | 0 | 2 |
| TKTL2     | chr4  | 164393220/G//C            | nonsynonymous | 0 | 2 |
| SLC25A2   | chr5  | 140683334/T//C            | nonsynonymous | 0 | 2 |
| TCERG1    | chr5  | 145843177/T//C            | nonsynonymous | 0 | 2 |
|           | chr6  | 56484766/G//A             | synonymous    | 0 | 2 |
| PHTF2     | chr7  | 77469611/A//G             | synonymous    | 0 | 2 |
| WDR91     | chr7  | 134896249/C//G            | synonymous    | 0 | 2 |
| PKHD1L1   | chr8  | 110447538/C//T            | nonsynonymous | 0 | 2 |
| GPR20     | chr8  | 142367897/C//A            | nonsynonymous | 0 | 2 |
| TYRP1     | chr9  | 12694266/G//A             | nonsynonymous | 0 | 2 |
| CUBN      | chr10 | 16981010/C//A             | nonsynonymous | 0 | 2 |
| ERCC6     | chr10 | 50666792/T//G             | synonymous    | 0 | 2 |
| PTEN      | chr10 | 89720683/C//T             | synonymous    | 0 | 2 |
| PAMR1     | chr11 | 35515766/C//T             | nonsynonymous | 0 | 2 |
| OR8K5     | chr11 | 55927421/C//T             | nonsynonymous | 0 | 2 |
| CDC42BPG  | chr11 | 64595208/C//T             | nonsynonymous | 0 | 2 |
| DPP3      | chr11 | 66264890/G//A             | nonsynonymous | 0 | 2 |
| STT3A     | chr11 | 125479485/G//GTA          | synonymous    | 0 | 2 |
| SLCO1B7   | chr12 | 21207422/C//A             | nonsynonymous | 0 | 2 |
| RASSF8    | chr12 | 26218155/A//C             | nonsynonymous | 0 | 2 |
| CDK4      | chr12 | 58144541/G//A             | nonsynonymous | 0 | 2 |
| SETD1B    | chr12 | 122242665/CA//C           | nonsynonymous | 0 | 2 |
| MTMR6     | chr13 | 25840338/C//A             | nonsynonymous | 0 | 2 |
| RNASE10   | chr14 | 20979254/G//T             | nonsynonymous | 0 | 2 |
| SIX4      | chr14 | 61190085/G//C             | nonsynonymous | 0 | 2 |
| SLC8A3    | chr14 | 70635083/A//T             | synonymous    | 0 | 2 |
| NRDE2     | chr14 | 90754540/AACAGAACGGTCTGG  | nonsynonymous | 0 | 2 |
| SLC24A5   | chr15 | 48431282/T//G             | nonsynonymous | 0 | 2 |
| ITGAM     | chr16 | 31336343/G//A             | nonsynonymous | 0 | 2 |
| ZNF469    | chr16 | 88502616/G//C             | nonsynonymous | 0 | 2 |
| TP53      | chr17 | 7578211/C//A              | nonsynonymous | 0 | 2 |
| TNFRSF13B | chr17 | 16852173/G//A             | synonymous    | 0 | 2 |
| TMEM132E  | chr17 | 32963198/C//A             | nonsynonymous | 0 | 2 |



|           |       |                |               |   |   |
|-----------|-------|----------------|---------------|---|---|
| LLGL2     | chr17 | 73564753/G//C  | nonsynonymous | 0 | 2 |
|           | chr18 | 29672602/C//G  | synonymous    | 0 | 2 |
| CDH19     | chr18 | 64218502/A//C  | synonymous    | 0 | 2 |
| ADGRE1    | chr19 | 6937328/G//C   | nonsynonymous | 0 | 2 |
| ATG4D     | chr19 | 10655810/A//T  | synonymous    | 0 | 2 |
| YIPF2     | chr19 | 11034671/G//T  | synonymous    | 0 | 2 |
| MYO9B     | chr19 | 17283768/T//G  | synonymous    | 0 | 2 |
| ZNF708    | chr19 | 21476910/G//T  | synonymous    | 1 | 1 |
| ZNF91     | chr19 | 23578232/C//G  | nonsynonymous | 0 | 2 |
| ATP4A     | chr19 | 36045951/T//A  | nonsynonymous | 0 | 2 |
| PAF1      | chr19 | 39879955/C//T  | nonsynonymous | 0 | 2 |
| KLK4      | chr19 | 51411981/C//G  | nonsynonymous | 0 | 2 |
| NCOA6     | chr20 | 33345761/G//C  | nonsynonymous | 0 | 2 |
| TAF4      | chr20 | 60587907/C//A  | nonsynonymous | 0 | 2 |
| SEC14L6   | chr22 | 30921089/C//G  | synonymous    | 0 | 2 |
| APOBEC3G  | chr22 | 39479831/G//A  | nonsynonymous | 0 | 2 |
| GNL3L     | chrX  | 54567760/C//T  | nonsynonymous | 0 | 2 |
| COL4A5    | chrX  | 107845151/G//A | nonsynonymous | 0 | 2 |
| WDPCP     | chr2  | 63631512/C//A  | nonsynonymous | 0 | 2 |
| TTC30A    | chr2  | 178482957/A//C | nonsynonymous | 0 | 2 |
| GNAT1     | chr3  | 50231618/C//A  | nonsynonymous | 0 | 2 |
| ADPRH     | chr3  | 119306313/C//T | nonsynonymous | 0 | 2 |
| FAT4      | chr4  | 126370300/G//A | nonsynonymous | 0 | 2 |
| GLRA1     | chr5  | 151239470/G//C | nonsynonymous | 0 | 2 |
| TNXB      | chr6  | 32037382/G//A  | synonymous    | 0 | 2 |
| MFSD4B    | chr6  | 111587808/C//T | nonsynonymous | 0 | 2 |
| NPC1L1    | chr7  | 44579814/G//A  | nonsynonymous | 0 | 2 |
| C7orf72   | chr7  | 50191073/C//A  | synonymous    | 0 | 2 |
| PTPRZ1    | chr7  | 121653099/C//T | synonymous    | 0 | 2 |
| PRSS3P2   | chr7  | 142481353/G//A | synonymous    | 0 | 2 |
| SEC16A    | chr9  | 139371928/G//A | nonsynonymous | 0 | 2 |
| C9orf163  | chr9  | 139379280/C//T | nonsynonymous | 0 | 2 |
| DIP2C     | chr10 | 436703/G//A    | nonsynonymous | 0 | 2 |
| ITIH2     | chr10 | 7769786/C//T   | nonsynonymous | 0 | 2 |
| NRG3      | chr10 | 84745186/G//A  | nonsynonymous | 0 | 2 |
| B4GALNT4  | chr11 | 377106/G//A    | synonymous    | 0 | 2 |
| CAPN1     | chr11 | 64953421/G//A  | nonsynonymous | 0 | 2 |
| P2RY6     | chr11 | 73008494/C//T  | nonsynonymous | 0 | 2 |
| C12orf71  | chr12 | 27234970/G//A  | synonymous    | 0 | 2 |
| TINF2     | chr14 | 24709873/T//G  | nonsynonymous | 0 | 2 |
| SLX4      | chr16 | 3646264/C//A   | nonsynonymous | 0 | 2 |
| C16orf52  | chr16 | 22086861/C//T  | nonsynonymous | 0 | 2 |
| ZNF689    | chr16 | 30616089/G//A  | synonymous    | 0 | 2 |
| DPEP3     | chr16 | 68014114/G//A  | nonsynonymous | 0 | 2 |
| ANKFN1    | chr17 | 54403618/G//T  | synonymous    | 0 | 2 |
| WIP1      | chr17 | 66425048/G//A  | nonsynonymous | 0 | 2 |
| CCDC114   | chr19 | 48800655/C//T  | nonsynonymous | 0 | 2 |
| ZNF274    | chr19 | 58723941/G//A  | nonsynonymous | 0 | 2 |
| PTPRA     | chr20 | 2945774/C//T   | nonsynonymous | 0 | 2 |
| CFAP61    | chr20 | 20243672/C//T  | nonsynonymous | 0 | 2 |
| KRTAP19-8 | chr21 | 32410628/T//A  | synonymous    | 0 | 2 |
| EP300     | chr22 | 41568593/G//C  | nonsynonymous | 0 | 2 |
| ZNF645    | chrX  | 22292363/C//A  | nonsynonymous | 0 | 2 |
| PLP1      | chrX  | 103041612/G//A | nonsynonymous | 0 | 2 |
| SLC25A43  | chrX  | 118540544/C//T | nonsynonymous | 0 | 2 |
| BRS3      | chrX  | 135574491/C//T | nonsynonymous | 0 | 2 |
| CTNNB1    | chr3  | 41266137/C//T  | nonsynonymous | 2 | 0 |
| PLEKHO1   | chr1  | 150131552/C//T | nonsynonymous | 0 | 2 |
| IQGAP3    | chr1  | 156517950/C//T | nonsynonymous | 0 | 2 |
| ASTN1     | chr1  | 176838102/G//A | synonymous    | 0 | 2 |
| KCNT2     | chr1  | 196459043/A//G | nonsynonymous | 0 | 2 |
| F13B      | chr1  | 197025007/G//A | nonsynonymous | 0 | 2 |
| AGT       | chr1  | 230839054/C//A | nonsynonymous | 0 | 2 |
| OTOF      | chr2  | 26695380/G//A  | synonymous    | 0 | 2 |
| HK2       | chr2  | 75115122/G//A  | nonsynonymous | 0 | 2 |
| PTCD3     | chr2  | 86364250/A//G  | nonsynonymous | 0 | 2 |
| ANKRD23   | chr2  | 97505494/G//C  | synonymous    | 0 | 2 |
| GRM7      | chr3  | 7188209/G//A   | nonsynonymous | 0 | 2 |
| GOLGA4    | chr3  | 37370007/A//C  | nonsynonymous | 0 | 2 |
| KLHL40    | chr3  | 42730433/C//T  | synonymous    | 0 | 2 |

|           |       |                    |               |   |   |
|-----------|-------|--------------------|---------------|---|---|
| KALRN     | chr3  | 124376289/C//T     | synonymous    | 0 | 2 |
| LINC01565 | chr3  | 128292158/G//T     | synonymous    | 0 | 2 |
| TRPC1     | chr3  | 142521045/A//T     | nonsynonymous | 0 | 2 |
| MED12L    | chr3  | 151112529/C//T     | synonymous    | 0 | 2 |
| STOX2     | chr4  | 184930527/C//T     | nonsynonymous | 0 | 2 |
| MAP3K1    | chr5  | 56177043/A//G      | synonymous    | 0 | 2 |
| APC       | chr5  | 112175216/G//T     | nonsynonymous | 0 | 2 |
| PCDHGA4   | chr5  | 140734755/C//T     | synonymous    | 0 | 2 |
| HAVCR1    | chr5  | 156479518/G//A     | nonsynonymous | 0 | 2 |
| HIST1H1B  | chr6  | 27834574/T//C      | synonymous    | 0 | 2 |
| FGD2      | chr6  | 36979617/C//T      | nonsynonymous | 0 | 2 |
| RPL7L1    | chr6  | 42847690/G//A      | nonsynonymous | 0 | 2 |
| XPO5      | chr6  | 43540293/G//A      | nonsynonymous | 0 | 2 |
| SLC35B2   | chr6  | 44223037/G//A      | synonymous    | 0 | 2 |
| GPNUMB    | chr7  | 23299622/C//T      | nonsynonymous | 0 | 2 |
| GCK       | chr7  | 44187439/T//C      | synonymous    | 0 | 2 |
| KEL       | chr7  | 142643391/C//T     | nonsynonymous | 0 | 2 |
| SSPO      | chr7  | 149500346/C//T     | synonymous    | 0 | 2 |
| CYP11B1   | chr8  | 143957763/G//T     | nonsynonymous | 0 | 2 |
| RAG1      | chr11 | 36596007/A//G      | nonsynonymous | 0 | 2 |
| TIGD3     | chr11 | 65124634/C//T      | nonsynonymous | 0 | 2 |
| LRP5      | chr11 | 68115647/C//T      | nonsynonymous | 0 | 2 |
| DYNC2H1   | chr11 | 103270487/C//T     | nonsynonymous | 0 | 2 |
| IGSF9B    | chr11 | 133789848/G//A     | nonsynonymous | 0 | 2 |
| KRT74     | chr12 | 52962039/G//A      | synonymous    | 0 | 2 |
| ANHX      | chr12 | 133810751/C//T     | synonymous    | 0 | 2 |
| TUBA3C    | chr13 | 19748203/C//T      | nonsynonymous | 0 | 2 |
| THSD1     | chr13 | 52952713/G//A      | synonymous    | 0 | 2 |
| ZFYVE26   | chr14 | 68256063/A//C      | nonsynonymous | 0 | 2 |
| IGDCC4    | chr15 | 65686780/C//T      | synonymous    | 0 | 2 |
| STRA6     | chr15 | 74487998/G//T      | nonsynonymous | 0 | 2 |
| WSCD1     | chr17 | 6023845/G//A       | nonsynonymous | 0 | 2 |
| ACOX1     | chr17 | 73945334/C//A      | synonymous    | 0 | 2 |
| CBX8      | chr17 | 77768549/C//A      | nonsynonymous | 0 | 2 |
| LMNB2     | chr19 | 2434320/C//T       | nonsynonymous | 0 | 2 |
| CCDC151   | chr19 | 11533199/C//A      | synonymous    | 0 | 2 |
| PSG7      | chr19 | 43439848/G//A      | synonymous    | 0 | 2 |
| NTF4      | chr19 | 49564984/G//A      | nonsynonymous | 0 | 2 |
|           | chr19 | 50758485/G//A      | synonymous    | 0 | 2 |
| SNAP25    | chr20 | 10280022/G//A      | nonsynonymous | 0 | 2 |
| TUBB1     | chr20 | 57598806/G//A      | synonymous    | 0 | 2 |
| MTG2      | chr20 | 60770943/G//A      | nonsynonymous | 0 | 2 |
| KRTAP10-6 | chr21 | 46012351/G//A      | synonymous    | 0 | 2 |
| PBDC1     | chrX  | 75396797/C//T      | nonsynonymous | 0 | 2 |
| NRK       | chrX  | 105153812/C//T     | nonsynonymous | 0 | 2 |
| TRPC5     | chrX  | 111090567/C//T     | nonsynonymous | 0 | 2 |
| F8        | chrX  | 154157303/T//C     | nonsynonymous | 0 | 2 |
| PUM1      | chr1  | 31532277/G//A      | nonsynonymous | 0 | 2 |
| CNGA3     | chr2  | 99006129/C//T      | nonsynonymous | 0 | 2 |
| TUBA3E    | chr2  | 130952725/C//T     | nonsynonymous | 0 | 2 |
| BAZ2B     | chr2  | 160289748/T//C     | nonsynonymous | 0 | 2 |
| CFAP65    | chr2  | 219894901/G//A     | synonymous    | 0 | 2 |
| FGD5      | chr3  | 14861538/C//T      | synonymous    | 0 | 2 |
| PLCD1     | chr3  | 38051771/G//A      | synonymous    | 0 | 2 |
| DCHS2     | chr4  | 155157404/C//T     | synonymous    | 0 | 2 |
| APC       | chr5  | 112175247/CTG//C   | nonsynonymous | 0 | 2 |
| FAT2      | chr5  | 150947998/G//C     | nonsynonymous | 0 | 2 |
| FARS2     | chr6  | 5368987/G//A       | nonsynonymous | 0 | 2 |
| SLC17A1   | chr6  | 25813380/G//A      | synonymous    | 0 | 2 |
| OR2J2     | chr6  | 29142214/T//G      | nonsynonymous | 0 | 2 |
| PIK3CG    | chr7  | 106508080/C//T     | nonsynonymous | 0 | 2 |
| OR6B1     | chr7  | 143701287/G//C     | synonymous    | 0 | 2 |
| CDK9      | chr9  | 130550544/G//A     | nonsynonymous | 0 | 2 |
| LAMC3     | chr9  | 133917080/G//A     | nonsynonymous | 0 | 2 |
| CXCL12    | chr10 | 44876285/G//A      | synonymous    | 0 | 2 |
| IFIT2     | chr10 | 91065878/C//A      | nonsynonymous | 0 | 2 |
| CFAP46    | chr10 | 134679564/G//A     | nonsynonymous | 0 | 2 |
| TH        | chr11 | 2189715/C//T       | synonymous    | 0 | 2 |
| LARGE2    | chr11 | 45947896/AAGGTG//A | nonsynonymous | 0 | 2 |
| MIR4690   | chr11 | 65403796/G//C      | synonymous    | 0 | 2 |

|           |       |                 |               |   |   |
|-----------|-------|-----------------|---------------|---|---|
| DDI1      | chr11 | 103908445/A//G  | nonsynonymous | 0 | 2 |
| PKNOX2    | chr11 | 125280091/G//A  | nonsynonymous | 0 | 2 |
| FLI1      | chr11 | 128628033/C//T  | synonymous    | 0 | 2 |
| FGF23     | chr12 | 4479729/C//T    | nonsynonymous | 0 | 2 |
| DCAF4     | chr14 | 73420880/C//T   | nonsynonymous | 0 | 2 |
| DICER1    | chr14 | 95570148/G//A   | synonymous    | 0 | 2 |
| RYR3      | chr15 | 34021137/C//T   | synonymous    | 0 | 2 |
| SETD1A    | chr16 | 30975492/C//T   | synonymous    | 0 | 2 |
| SLC12A3   | chr16 | 56918001/G//A   | synonymous    | 0 | 2 |
| SLC52A1   | chr17 | 4936433/A//AAC  | nonsynonymous | 0 | 2 |
| KIF2B     | chr17 | 51900881/C//T   | nonsynonymous | 0 | 2 |
| CACNG1    | chr17 | 65040805/G//A   | nonsynonymous | 0 | 2 |
| SMAD2     | chr18 | 45372045/T//A   | nonsynonymous | 0 | 2 |
| CHST8     | chr19 | 34263100/G//A   | nonsynonymous | 0 | 2 |
| DNAAF3    | chr19 | 55670471/C//T   | nonsynonymous | 0 | 2 |
| RNF114    | chr20 | 48568736/G//A   | synonymous    | 0 | 2 |
| TENM1     | chrX  | 123657272/G//T  | nonsynonymous | 0 | 2 |
| BCAP31    | chrX  | 152967557/C//A  | nonsynonymous | 0 | 2 |
| APC       | chr5  | 112175482/GA//G | nonsynonymous | 2 | 0 |
| CCNL2     | chr1  | 1323222/A//G    | synonymous    | 0 | 2 |
| MIB2      | chr1  | 1558926/G//A    | nonsynonymous | 0 | 2 |
| PEX10     | chr1  | 2337971/G//A    | synonymous    | 0 | 2 |
| AJAP1     | chr1  | 4772564/C//T    | nonsynonymous | 0 | 2 |
| CHD5      | chr1  | 6204126/A//G    | nonsynonymous | 0 | 2 |
| CHD5      | chr1  | 6214887/C//T    | nonsynonymous | 0 | 2 |
| RPL22     | chr1  | 6253081/C//T    | nonsynonymous | 0 | 2 |
|           | chr1  | 6947740/C//T    | synonymous    | 0 | 2 |
| CAMTA1    | chr1  | 7811313/C//T    | nonsynonymous | 0 | 2 |
| SLC2A7    | chr1  | 9067389/G//A    | nonsynonymous | 0 | 2 |
| C1orf127  | chr1  | 11008316/G//A   | nonsynonymous | 0 | 2 |
| ANGPTL7   | chr1  | 11255039/C//T   | nonsynonymous | 0 | 2 |
| MTOR      | chr1  | 11319309/C//T   | nonsynonymous | 0 | 2 |
| DISP3     | chr1  | 11580795/G//A   | nonsynonymous | 0 | 2 |
| DISP3     | chr1  | 11595706/G//A   | synonymous    | 0 | 2 |
| VPS13D    | chr1  | 12378269/G//A   | nonsynonymous | 0 | 2 |
| AADACL3   | chr1  | 12776258/C//A   | nonsynonymous | 0 | 2 |
| PRAMEF12  | chr1  | 12837662/C//T   | nonsynonymous | 0 | 2 |
| PRAMEF2   | chr1  | 12919856/T//C   | nonsynonymous | 0 | 2 |
| PDPN      | chr1  | 13910281/C//T   | synonymous    | 0 | 2 |
| PRDM2     | chr1  | 14068567/G//A   | nonsynonymous | 0 | 2 |
| PLEKHM2   | chr1  | 16044389/C//T   | synonymous    | 0 | 2 |
| HSPB7     | chr1  | 16342222/G//A   | synonymous    | 0 | 2 |
| FAM131C   | chr1  | 16385073/C//T   | synonymous    | 0 | 2 |
| NECAP2    | chr1  | 16774426/G//A   | synonymous    | 0 | 2 |
| CROCC     | chr1  | 17272037/G//A   | nonsynonymous | 0 | 2 |
| ARHGEF10L | chr1  | 17939588/C//T   | synonymous    | 0 | 2 |
| KLHDC7A   | chr1  | 18809211/G//A   | nonsynonymous | 0 | 2 |
| UBR4      | chr1  | 19487516/T//G   | nonsynonymous | 0 | 2 |
| PLA2G2F   | chr1  | 20470022/G//A   | nonsynonymous | 0 | 2 |
| KIF17     | chr1  | 21014001/C//T   | synonymous    | 0 | 2 |
| EPHA8     | chr1  | 22915661/G//A   | nonsynonymous | 0 | 2 |
| GALE      | chr1  | 24123628/C//T   | nonsynonymous | 0 | 2 |
| MYOM3     | chr1  | 24390605/G//A   | synonymous    | 0 | 2 |
| GRHL3     | chr1  | 24669504/C//T   | nonsynonymous | 0 | 2 |
| RHD       | chr1  | 25627475/C//T   | synonymous    | 0 | 2 |
| UBXN11    | chr1  | 26624477/G//T   | synonymous    | 0 | 2 |
| AIM1L     | chr1  | 26672536/C//T   | nonsynonymous | 0 | 2 |
| ARID1A    | chr1  | 27106879/C//T   | nonsynonymous | 0 | 2 |
| THEMIS2   | chr1  | 28208733/C//T   | nonsynonymous | 0 | 2 |
| THEMIS2   | chr1  | 28209091/G//A   | nonsynonymous | 0 | 2 |
| SMPDL3B   | chr1  | 28285221/G//A   | nonsynonymous | 0 | 2 |
| ADGRB2    | chr1  | 32204909/C//A   | nonsynonymous | 0 | 2 |
| ADGRB2    | chr1  | 32207065/C//T   | nonsynonymous | 0 | 2 |
| KHDRBS1   | chr1  | 32503521/C//T   | nonsynonymous | 0 | 2 |
| DCDC2B    | chr1  | 32677773/G//T   | nonsynonymous | 0 | 2 |
| NCDN      | chr1  | 36024809/G//T   | nonsynonymous | 0 | 2 |
| NCDN      | chr1  | 36031117/C//T   | synonymous    | 0 | 2 |
| CLSPN     | chr1  | 36209073/CAT//C | nonsynonymous | 0 | 2 |
| TEKT2     | chr1  | 36553678/G//A   | nonsynonymous | 0 | 2 |
| PPT1      | chr1  | 40546147/G//A   | synonymous    | 0 | 2 |

|            |      |                         |               |   |   |
|------------|------|-------------------------|---------------|---|---|
| KCNQ4      | chr1 | 41300686/G//A           | nonsynonymous | 0 | 2 |
|            | chr1 | 43149039/A//G           | synonymous    | 0 | 2 |
| P3H1       | chr1 | 43212424/C//T           | nonsynonymous | 0 | 2 |
| PTPRF      | chr1 | 44057118/GGGCAGCCTGC//G | nonsynonymous | 0 | 2 |
| TCTEX1D4   | chr1 | 45271700/G//A           | nonsynonymous | 0 | 2 |
| MAST2      | chr1 | 46489619/C//T           | nonsynonymous | 0 | 2 |
| TTC39A     | chr1 | 51753908/C//T           | nonsynonymous | 0 | 2 |
| PRPF38A    | chr1 | 52874248/C//T           | nonsynonymous | 0 | 2 |
| ZYG11B     | chr1 | 53236740/G//A           | nonsynonymous | 0 | 2 |
| GLIS1      | chr1 | 54060472/G//A           | nonsynonymous | 0 | 2 |
| LRRC42     | chr1 | 54417904/C//T           | nonsynonymous | 0 | 2 |
| PLPP3      | chr1 | 56990205/G//A           | nonsynonymous | 0 | 2 |
| PATJ       | chr1 | 62374152/C//T           | nonsynonymous | 0 | 2 |
| PGM1       | chr1 | 64120143/G//A           | synonymous    | 0 | 2 |
| LRRC7      | chr1 | 70225906/A//T           | nonsynonymous | 0 | 2 |
| LRRC7      | chr1 | 70484416/C//T           | synonymous    | 0 | 2 |
| ZRANB2-AS1 | chr1 | 71512328/C//T           | synonymous    | 0 | 2 |
| GBP5       | chr1 | 89728086/T//C           | nonsynonymous | 0 | 2 |
| LRRC8B     | chr1 | 90049861/G//A           | nonsynonymous | 0 | 2 |
| AGL        | chr1 | 100356892/C//T          | nonsynonymous | 0 | 2 |
| SASS6      | chr1 | 100573550/C//T          | nonsynonymous | 0 | 2 |
| VCAM1      | chr1 | 101196794/C//T          | synonymous    | 0 | 2 |
| RNPC3      | chr1 | 104068882/C//T          | synonymous    | 0 | 2 |
| KCNA3      | chr1 | 111216388/G//A          | synonymous    | 0 | 2 |
| IGSF3      | chr1 | 117119904/G//A          | synonymous    | 0 | 2 |
| GJA8       | chr1 | 147380414/C//T          | nonsynonymous | 0 | 2 |
| FAM63A     | chr1 | 150969846/G//A          | synonymous    | 0 | 2 |
| THEM4      | chr1 | 151861769/A//G          | nonsynonymous | 0 | 2 |
| KPRP       | chr1 | 152733509/C//T          | nonsynonymous | 0 | 2 |
| CHRN2      | chr1 | 154548282/C//A          | synonymous    | 0 | 2 |
| PBXIP1     | chr1 | 154920768/G//A          | nonsynonymous | 0 | 2 |
| EFNA3      | chr1 | 155058923/G//A          | synonymous    | 0 | 2 |
| THBS3      | chr1 | 155175005/C//T          | nonsynonymous | 0 | 2 |
| ASH1L      | chr1 | 155313212/C//T          | nonsynonymous | 0 | 2 |
| GON4L      | chr1 | 155823276/AT//A         | nonsynonymous | 0 | 2 |
| ARHGEF2    | chr1 | 155931598/C//T          | nonsynonymous | 0 | 2 |
| CD5L       | chr1 | 157805813/C//T          | nonsynonymous | 0 | 2 |
| OR10K1     | chr1 | 158436255/C//T          | nonsynonymous | 0 | 2 |
| MNDA       | chr1 | 158817524/G//A          | nonsynonymous | 0 | 2 |
| COPA       | chr1 | 160293298/C//A          | nonsynonymous | 0 | 2 |
| ITLN2      | chr1 | 160914916/C//T          | synonymous    | 0 | 2 |
| DDR2       | chr1 | 162731065/G//A          | nonsynonymous | 0 | 2 |
| LMX1A      | chr1 | 165218816/G//A          | nonsynonymous | 0 | 2 |
| POU2F1     | chr1 | 167381535/C//T          | nonsynonymous | 0 | 2 |
| ADCY10     | chr1 | 167829118/C//T          | nonsynonymous | 0 | 2 |
| CCDC181    | chr1 | 169391241/G//A          | nonsynonymous | 0 | 2 |
| SELP       | chr1 | 169565287/C//T          | synonymous    | 0 | 2 |
|            | chr1 | 170983403/T//C          | synonymous    | 0 | 2 |
| PRRC2C     | chr1 | 171501663/G//T          | nonsynonymous | 0 | 2 |
| TNN        | chr1 | 175087702/G//A          | nonsynonymous | 0 | 2 |
| PAPPA2     | chr1 | 176563812/C//T          | nonsynonymous | 0 | 2 |
| PAPPA2     | chr1 | 176668468/A//G          | synonymous    | 0 | 2 |
| CEP350     | chr1 | 180012272/C//T          | nonsynonymous | 0 | 2 |
| MR1        | chr1 | 181018344/A//G          | nonsynonymous | 0 | 2 |
| TSEN15     | chr1 | 184023541/G//A          | synonymous    | 0 | 2 |
| HMCN1      | chr1 | 185969203/T//C          | synonymous    | 0 | 2 |
| HMCN1      | chr1 | 186114603/C//T          | nonsynonymous | 0 | 2 |
| BRINP3     | chr1 | 190068141/G//A          | synonymous    | 0 | 2 |
| BRINP3     | chr1 | 190129925/G//A          | nonsynonymous | 0 | 2 |
| CFHR3      | chr1 | 196749055/A//G          | nonsynonymous | 0 | 2 |
| ZBTB41     | chr1 | 197168659/A//C          | nonsynonymous | 0 | 2 |
| CRB1       | chr1 | 197297729/C//T          | nonsynonymous | 0 | 2 |
| PTPRC      | chr1 | 198723415/C//T          | nonsynonymous | 0 | 2 |
| CSRP1      | chr1 | 201465312/G//A          | synonymous    | 0 | 2 |
| NAV1       | chr1 | 201618293/C//A          | nonsynonymous | 0 | 2 |
| KLHL12     | chr1 | 202887311/G//A          | synonymous    | 0 | 2 |
| ADORA1     | chr1 | 203097939/C//T          | synonymous    | 0 | 2 |
| PPP1R15B   | chr1 | 204379124/A//G          | synonymous    | 0 | 2 |
| NFASC      | chr1 | 204923462/G//T          | nonsynonymous | 0 | 2 |
| TMCC2      | chr1 | 205210948/A//G          | nonsynonymous | 0 | 2 |

|           |      |                |               |   |   |
|-----------|------|----------------|---------------|---|---|
| PIGR      | chr1 | 207107907/G//A | synonymous    | 0 | 2 |
| NEK2      | chr1 | 211848846/C//T | synonymous    | 0 | 2 |
| KCNK2     | chr1 | 215259772/G//A | synonymous    | 0 | 2 |
| LYPLAL1   | chr1 | 219383902/A//G | synonymous    | 0 | 2 |
| TLR5      | chr1 | 223284383/C//T | nonsynonymous | 0 | 2 |
| FBXO28    | chr1 | 224345314/C//T | nonsynonymous | 0 | 2 |
| EPHX1     | chr1 | 226019589/G//A | nonsynonymous | 0 | 2 |
| LEFTY1    | chr1 | 226074635/C//T | nonsynonymous | 0 | 2 |
| ACBD3     | chr1 | 226349343/C//T | nonsynonymous | 0 | 2 |
| MIXL1     | chr1 | 226413369/C//T | synonymous    | 0 | 2 |
| OBSCN     | chr1 | 228404751/C//T | synonymous    | 0 | 2 |
| OBSCN     | chr1 | 228482568/C//T | nonsynonymous | 0 | 2 |
| HIST3H2A  | chr1 | 228645529/A//C | synonymous    | 0 | 2 |
| COG2      | chr1 | 230827260/G//A | nonsynonymous | 0 | 2 |
| SIPA1L2   | chr1 | 232649812/G//A | nonsynonymous | 0 | 2 |
| PCNX2     | chr1 | 233314840/G//A | nonsynonymous | 0 | 2 |
| KCNK1     | chr1 | 233802496/C//T | nonsynonymous | 0 | 2 |
| NID1      | chr1 | 236144919/G//A | synonymous    | 0 | 2 |
| NID1      | chr1 | 236205344/G//A | nonsynonymous | 0 | 2 |
| NID1      | chr1 | 236212188/C//T | synonymous    | 0 | 2 |
| CHRM3     | chr1 | 240071457/G//A | nonsynonymous | 0 | 2 |
| AKT3      | chr1 | 243716231/A//T | nonsynonymous | 0 | 2 |
| KIF26B    | chr1 | 245848872/G//A | nonsynonymous | 0 | 2 |
| CNST      | chr1 | 246811011/C//T | nonsynonymous | 0 | 2 |
| NLRP3     | chr1 | 247607348/C//T | nonsynonymous | 0 | 2 |
| OR2T8     | chr1 | 248084484/G//A | synonymous    | 0 | 2 |
| OR2L3     | chr1 | 248224907/C//T | synonymous    | 0 | 2 |
| OR2L13    | chr1 | 248262870/C//T | nonsynonymous | 0 | 2 |
| OR2G6     | chr1 | 248685134/C//A | nonsynonymous | 0 | 2 |
| PXDN      | chr2 | 1637944/A//C   | synonymous    | 0 | 2 |
| PXDN      | chr2 | 1653244/C//T   | nonsynonymous | 0 | 2 |
| LPIN1     | chr2 | 11955273/G//A  | nonsynonymous | 0 | 2 |
| SMC6      | chr2 | 17919559/G//A  | synonymous    | 0 | 2 |
| HS1BP3    | chr2 | 20818792/G//A  | synonymous    | 0 | 2 |
| ADCY3     | chr2 | 25054533/G//A  | nonsynonymous | 0 | 2 |
| DNMT3A    | chr2 | 25467450/C//A  | synonymous    | 0 | 2 |
| C2orf70   | chr2 | 26798783/G//A  | nonsynonymous | 0 | 2 |
| KCNK3     | chr2 | 26951259/C//T  | synonymous    | 0 | 2 |
| DPYSL5    | chr2 | 27167644/C//T  | nonsynonymous | 0 | 2 |
| DPYSL5    | chr2 | 27169897/C//T  | synonymous    | 0 | 2 |
| PREB      | chr2 | 27354543/G//A  | nonsynonymous | 0 | 2 |
| CAD       | chr2 | 27465631/C//T  | synonymous    | 0 | 2 |
| SLC30A3   | chr2 | 27480097/C//T  | synonymous    | 0 | 2 |
| FOSL2     | chr2 | 28635015/A//G  | synonymous    | 0 | 2 |
| PLB1      | chr2 | 28812936/C//T  | nonsynonymous | 0 | 2 |
| ALK       | chr2 | 29436950/G//A  | synonymous    | 0 | 2 |
| ALK       | chr2 | 29498070/G//A  | nonsynonymous | 0 | 2 |
| CAPN13    | chr2 | 30980996/T//C  | nonsynonymous | 0 | 2 |
| BIRC6     | chr2 | 32664600/C//T  | nonsynonymous | 0 | 2 |
| FEZ2      | chr2 | 36818091/A//G  | synonymous    | 0 | 2 |
| DHX57     | chr2 | 39070320/C//T  | nonsynonymous | 0 | 2 |
| ABCG8     | chr2 | 44099258/G//A  | nonsynonymous | 0 | 2 |
| PRKCE     | chr2 | 45879483/G//A  | nonsynonymous | 0 | 2 |
| EPAS1     | chr2 | 46605103/G//A  | synonymous    | 0 | 2 |
|           | chr2 | 47397926/G//T  | synonymous    | 0 | 2 |
| SPTBN1    | chr2 | 54852032/G//A  | nonsynonymous | 0 | 2 |
| EML6      | chr2 | 55191850/C//T  | nonsynonymous | 0 | 2 |
| OTX1      | chr2 | 63283112/C//T  | synonymous    | 0 | 2 |
| PNO1      | chr2 | 68385138/C//T  | synonymous    | 0 | 2 |
| FIGLA     | chr2 | 71017615/G//A  | synonymous    | 0 | 2 |
| VAX2      | chr2 | 71148369/G//A  | nonsynonymous | 0 | 2 |
| MPHOSPH10 | chr2 | 71371667/C//T  | nonsynonymous | 0 | 2 |
| DYSF      | chr2 | 71740898/G//A  | synonymous    | 0 | 2 |
| SLC4A5    | chr2 | 74474229/T//C  | nonsynonymous | 0 | 2 |
| SLC4A5    | chr2 | 74492333/C//T  | nonsynonymous | 0 | 2 |
| MRPL53    | chr2 | 74699326/G//A  | nonsynonymous | 0 | 2 |
| SEMA4F    | chr2 | 74907289/C//T  | nonsynonymous | 0 | 2 |
| CTNNA2    | chr2 | 80801387/G//A  | nonsynonymous | 0 | 2 |
| DNAH6     | chr2 | 84777082/G//A  | synonymous    | 0 | 2 |
| RETSAT    | chr2 | 85571732/G//A  | nonsynonymous | 0 | 2 |

|          |      |                    |               |   |   |
|----------|------|--------------------|---------------|---|---|
| SH2D6    | chr2 | 85663600/C//T      | synonymous    | 0 | 2 |
| KDM3A    | chr2 | 86677038/C//T      | nonsynonymous | 0 | 2 |
| FABP1    | chr2 | 88425744/G//A      | nonsynonymous | 0 | 2 |
| PROM2    | chr2 | 95941838/C//T      | nonsynonymous | 0 | 2 |
| ASTL     | chr2 | 96795829/G//A      | synonymous    | 0 | 2 |
| FER1L5   | chr2 | 97361561/C//T      | nonsynonymous | 0 | 2 |
| CNNM4    | chr2 | 97427884/G//T      | nonsynonymous | 0 | 2 |
| ACTR1B   | chr2 | 98275383/G//A      | synonymous    | 0 | 2 |
| ACTR1B   | chr2 | 98275853/C//T      | nonsynonymous | 0 | 2 |
| ZAP70    | chr2 | 98340516/C//T      | nonsynonymous | 0 | 2 |
| NCK2     | chr2 | 106498388/C//T     | synonymous    | 0 | 2 |
| ST6GAL2  | chr2 | 107423228/G//A     | nonsynonymous | 0 | 2 |
| BUB1     | chr2 | 111430269/C//T     | nonsynonymous | 0 | 2 |
| FBLN7    | chr2 | 112922609/C//T     | synonymous    | 0 | 2 |
| SLC20A1  | chr2 | 113417093/A//G     | nonsynonymous | 0 | 2 |
| STEAP3   | chr2 | 120020700/C//T     | nonsynonymous | 0 | 2 |
| TFCP2L1  | chr2 | 122038782/C//T     | nonsynonymous | 0 | 2 |
| CLASP1   | chr2 | 122227441/C//T     | nonsynonymous | 0 | 2 |
| MYO7B    | chr2 | 128334255/C//T     | nonsynonymous | 0 | 2 |
| MYO7B    | chr2 | 128381686/G//A     | nonsynonymous | 0 | 2 |
| WDR33    | chr2 | 128477132/C//T     | nonsynonymous | 0 | 2 |
| POLR2D   | chr2 | 128610503/G//A     | nonsynonymous | 0 | 2 |
| GPR39    | chr2 | 133402902/G//A     | nonsynonymous | 0 | 2 |
| TMEM163  | chr2 | 135308176/G//A     | synonymous    | 0 | 2 |
| LCT      | chr2 | 136590758/C//T     | nonsynonymous | 0 | 2 |
| THSD7B   | chr2 | 137988629/G//A     | nonsynonymous | 0 | 2 |
| LRP1B    | chr2 | 141143453/GTTAC//G | synonymous    | 0 | 2 |
| KIF5C    | chr2 | 149866663/C//T     | synonymous    | 0 | 2 |
| NEB      | chr2 | 152482152/G//A     | nonsynonymous | 0 | 2 |
| NEB      | chr2 | 152484315/C//T     | nonsynonymous | 0 | 2 |
| ARL5A    | chr2 | 152684745/G//T     | synonymous    | 0 | 2 |
| FMNL2    | chr2 | 153475605/C//T     | synonymous    | 0 | 2 |
| TANC1    | chr2 | 160007039/C//A     | synonymous    | 0 | 2 |
| TANC1    | chr2 | 160035450/C//T     | synonymous    | 0 | 2 |
| TANC1    | chr2 | 160087070/C//T     | synonymous    | 0 | 2 |
| COBLL1   | chr2 | 165551036/C//T     | nonsynonymous | 0 | 2 |
| CSRNP3   | chr2 | 166536026/C//T     | synonymous    | 0 | 2 |
| XIRP2    | chr2 | 168099276/C//T     | synonymous    | 0 | 2 |
| LRP2     | chr2 | 170025181/G//A     | nonsynonymous | 0 | 2 |
| DLX2     | chr2 | 172967148/T//C     | nonsynonymous | 0 | 2 |
| ITGA6    | chr2 | 173349898/A//G     | nonsynonymous | 0 | 2 |
| PDK1     | chr2 | 173423568/T//C     | nonsynonymous | 0 | 2 |
| TTN      | chr2 | 179404240/C//T     | nonsynonymous | 0 | 2 |
| TTN      | chr2 | 179436431/C//T     | nonsynonymous | 0 | 2 |
| TTN      | chr2 | 179438273/G//A     | nonsynonymous | 0 | 2 |
| TTN      | chr2 | 179594237/C//T     | nonsynonymous | 0 | 2 |
|          | chr2 | 179614378/G//T     | synonymous    | 0 | 2 |
| TTN      | chr2 | 179666963/G//A     | nonsynonymous | 0 | 2 |
| ZNF804A  | chr2 | 185803801/A//T     | synonymous    | 0 | 2 |
|          | chr2 | 189454467/C//T     | synonymous    | 0 | 2 |
| COL5A2   | chr2 | 189898939/G//A     | nonsynonymous | 0 | 2 |
| PGAP1    | chr2 | 197767333/A//G     | synonymous    | 0 | 2 |
| SATB2    | chr2 | 200213744/G//T     | nonsynonymous | 0 | 2 |
| ICA1L    | chr2 | 203684477/C//T     | nonsynonymous | 0 | 2 |
|          | chr2 | 210569351/C//T     | synonymous    | 0 | 2 |
| XRCC5    | chr2 | 217055041/G//A     | nonsynonymous | 0 | 2 |
| TNS1     | chr2 | 218713695/C//T     | synonymous    | 0 | 2 |
| TNS1     | chr2 | 218745630/C//T     | nonsynonymous | 0 | 2 |
| GPBAR1   | chr2 | 219127539/C//T     | nonsynonymous | 0 | 2 |
| BCS1L    | chr2 | 219527335/G//A     | synonymous    | 0 | 2 |
| STK36    | chr2 | 219545354/C//T     | nonsynonymous | 0 | 2 |
| CDK5R2   | chr2 | 219825185/G//A     | nonsynonymous | 0 | 2 |
| CHPF     | chr2 | 220404386/C//T     | nonsynonymous | 0 | 2 |
| PAX3     | chr2 | 223085058/C//T     | nonsynonymous | 0 | 2 |
| SGPP2    | chr2 | 223423242/G//A     | synonymous    | 0 | 2 |
| SCG2     | chr2 | 224463321/G//A     | nonsynonymous | 0 | 2 |
| SERPINE2 | chr2 | 224856526/G//A     | nonsynonymous | 0 | 2 |
| NYAP2    | chr2 | 226273739/G//A     | nonsynonymous | 0 | 2 |
| IRS1     | chr2 | 227660794/A//G     | synonymous    | 0 | 2 |
| SLC19A3  | chr2 | 228563732/G//A     | synonymous    | 0 | 2 |

|          |      |                |               |   |   |
|----------|------|----------------|---------------|---|---|
| SPATA3   | chr2 | 231867434/C//T | nonsynonymous | 0 | 2 |
| ECEL1    | chr2 | 233344842/C//T | synonymous    | 0 | 2 |
| DGKD     | chr2 | 234358738/G//A | nonsynonymous | 0 | 2 |
| RBM44    | chr2 | 238726253/A//G | nonsynonymous | 0 | 2 |
| PER2     | chr2 | 239164301/G//A | nonsynonymous | 0 | 2 |
| HDAC4    | chr2 | 240002870/C//T | nonsynonymous | 0 | 2 |
| GPC1     | chr2 | 241401664/G//A | nonsynonymous | 0 | 2 |
| GPC1     | chr2 | 241402778/G//A | synonymous    | 0 | 2 |
|          | chr2 | 241500512/G//T | synonymous    | 0 | 2 |
| RNPEPL1  | chr2 | 241516004/G//A | synonymous    | 0 | 2 |
| SNED1    | chr2 | 242009624/C//T | synonymous    | 0 | 2 |
| IL5RA    | chr3 | 3139842/G//A   | nonsynonymous | 0 | 2 |
| SRGAP3   | chr3 | 9036074/G//A   | synonymous    | 0 | 2 |
| TADA3    | chr3 | 9821949/C//T   | synonymous    | 0 | 2 |
| ATP2B2   | chr3 | 10392245/C//T  | nonsynonymous | 0 | 2 |
| ATP2B2   | chr3 | 10420024/G//A  | synonymous    | 0 | 2 |
| GRIP2    | chr3 | 14581777/C//T  | synonymous    | 0 | 2 |
| NR2C2    | chr3 | 15064742/C//T  | nonsynonymous | 0 | 2 |
| HACL1    | chr3 | 15643210/C//A  | synonymous    | 0 | 2 |
| KCNH8    | chr3 | 19295378/C//T  | synonymous    | 0 | 2 |
| OXSM     | chr3 | 25833095/G//A  | nonsynonymous | 0 | 2 |
| TGFBR2   | chr3 | 30713601/C//T  | nonsynonymous | 0 | 2 |
| GPD1L    | chr3 | 32200587/G//A  | nonsynonymous | 0 | 2 |
| TMPPE    | chr3 | 33134910/C//T  | nonsynonymous | 0 | 2 |
| TRANK1   | chr3 | 36898755/G//A  | nonsynonymous | 0 | 2 |
| TRANK1   | chr3 | 36898892/G//A  | nonsynonymous | 0 | 2 |
| ITGA9    | chr3 | 37514923/G//A  | nonsynonymous | 0 | 2 |
| DLEC1    | chr3 | 38150955/C//T  | synonymous    | 0 | 2 |
| HHATL    | chr3 | 42739841/G//A  | synonymous    | 0 | 2 |
| TOPAZ1   | chr3 | 44283818/G//A  | synonymous    | 0 | 2 |
| TGM4     | chr3 | 44945458/A//G  | nonsynonymous | 0 | 2 |
| CDCP1    | chr3 | 45152127/A//T  | nonsynonymous | 0 | 2 |
| LZTFL1   | chr3 | 45877152/G//A  | nonsynonymous | 0 | 2 |
| CCR9     | chr3 | 45943064/G//A  | nonsynonymous | 0 | 2 |
| SCAP     | chr3 | 47456657/G//A  | nonsynonymous | 0 | 2 |
| SCAP     | chr3 | 47462192/G//A  | nonsynonymous | 0 | 2 |
| PLXNB1   | chr3 | 48459679/C//T  | nonsynonymous | 0 | 2 |
| CELSR3   | chr3 | 48697683/G//A  | synonymous    | 0 | 2 |
| LAMB2    | chr3 | 49160340/C//T  | nonsynonymous | 0 | 2 |
| BSN      | chr3 | 49680058/G//A  | nonsynonymous | 0 | 2 |
| APEH     | chr3 | 49713615/A//G  | nonsynonymous | 0 | 2 |
| MST1     | chr3 | 49721510/C//T  | nonsynonymous | 0 | 2 |
| UBA7     | chr3 | 49850517/C//T  | nonsynonymous | 0 | 2 |
| TRAIP    | chr3 | 49869404/G//A  | nonsynonymous | 0 | 2 |
| SLC38A3  | chr3 | 50255226/A//G  | nonsynonymous | 0 | 2 |
| SEMA3B   | chr3 | 50313252/G//A  | nonsynonymous | 0 | 2 |
| NAT6     | chr3 | 50334402/G//A  | nonsynonymous | 0 | 2 |
| GRM2     | chr3 | 51749927/G//A  | nonsynonymous | 0 | 2 |
| POC1A    | chr3 | 52130607/C//T  | nonsynonymous | 0 | 2 |
| TLR9     | chr3 | 52255688/C//T  | nonsynonymous | 0 | 2 |
| DNAH1    | chr3 | 52417963/G//A  | synonymous    | 0 | 2 |
| GLT8D1   | chr3 | 52730292/C//T  | nonsynonymous | 0 | 2 |
| ITIH3    | chr3 | 52840156/T//G  | nonsynonymous | 0 | 2 |
| SLMAP    | chr3 | 57817251/C//T  | nonsynonymous | 0 | 2 |
| FLNB     | chr3 | 58092419/A//T  | nonsynonymous | 0 | 2 |
| ADAMTS9  | chr3 | 64527073/C//T  | nonsynonymous | 0 | 2 |
| SUCLG2   | chr3 | 67426243/G//A  | synonymous    | 0 | 2 |
| MITF     | chr3 | 69928359/G//A  | nonsynonymous | 0 | 2 |
| GBE1     | chr3 | 81548277/C//T  | nonsynonymous | 0 | 2 |
| MINA     | chr3 | 97686349/G//T  | nonsynonymous | 0 | 2 |
| ADGRG7   | chr3 | 100328717/C//T | nonsynonymous | 0 | 2 |
| ZBTB11   | chr3 | 101384051/T//C | nonsynonymous | 0 | 2 |
| BOC      | chr3 | 112991274/G//A | nonsynonymous | 0 | 2 |
| ZDHHC23  | chr3 | 113679644/C//T | synonymous    | 0 | 2 |
| ARHGAP31 | chr3 | 119133521/G//A | synonymous    | 0 | 2 |
| TIMMDC1  | chr3 | 119236129/G//A | nonsynonymous | 0 | 2 |
| GSK3B    | chr3 | 119562094/G//A | synonymous    | 0 | 2 |
| KALRN    | chr3 | 124415056/A//G | synonymous    | 0 | 2 |
| CHST13   | chr3 | 126261410/C//T | nonsynonymous | 0 | 2 |
| MGLL     | chr3 | 127413938/G//A | synonymous    | 0 | 2 |

|          |      |                   |               |   |   |
|----------|------|-------------------|---------------|---|---|
| EEFSEC   | chr3 | 128060483/C//T    | synonymous    | 0 | 2 |
| TF       | chr3 | 133473497/C//T    | nonsynonymous | 0 | 2 |
| NME9     | chr3 | 138023764/C//T    | nonsynonymous | 0 | 2 |
| PRR23B   | chr3 | 138739249/C//T    | synonymous    | 0 | 2 |
| NMNAT3   | chr3 | 139280119/G//A    | synonymous    | 0 | 2 |
| TRPC1    | chr3 | 142496524/T//C    | nonsynonymous | 0 | 2 |
| CPB1     | chr3 | 148575288/C//T    | synonymous    | 0 | 2 |
| CPA3     | chr3 | 148614490/C//T    | nonsynonymous | 0 | 2 |
| HLTF     | chr3 | 148768095/C//T    | nonsynonymous | 0 | 2 |
| IGSF10   | chr3 | 151154752/G//A    | nonsynonymous | 0 | 2 |
| P2RY1    | chr3 | 152553832/C//T    | synonymous    | 0 | 2 |
| SHOX2    | chr3 | 157815959/G//A    | nonsynonymous | 0 | 2 |
| SLC7A14  | chr3 | 170184995/C//T    | nonsynonymous | 0 | 2 |
| SPATA16  | chr3 | 172674522/T//C    | synonymous    | 0 | 2 |
| ZNF639   | chr3 | 179051896/C//T    | nonsynonymous | 0 | 2 |
| ACTL6A   | chr3 | 179287968/T//C    | synonymous    | 0 | 2 |
| KLHL6    | chr3 | 183226233/C//T    | nonsynonymous | 0 | 2 |
| PARL     | chr3 | 183551527/C//T    | synonymous    | 0 | 2 |
| DVL3     | chr3 | 183887975/C//T    | synonymous    | 0 | 2 |
| DVL3     | chr3 | 183888005/C//T    | synonymous    | 0 | 2 |
| ABCF3    | chr3 | 183905738/G//A    | nonsynonymous | 0 | 2 |
| PSMD2    | chr3 | 184018068/GAGA//G | nonsynonymous | 0 | 2 |
| CHRD     | chr3 | 184099602/C//T    | nonsynonymous | 0 | 2 |
| TP63     | chr3 | 189587113/C//T    | nonsynonymous | 0 | 2 |
| CCDC50   | chr3 | 191075810/G//A    | nonsynonymous | 0 | 2 |
|          | chr3 | 191093190/G//A    | synonymous    | 0 | 2 |
|          | chr3 | 191093296/A//C    | synonymous    | 0 | 2 |
| FGF12    | chr3 | 192126114/C//T    | synonymous    | 0 | 2 |
| SMCO1    | chr3 | 196242161/G//A    | synonymous    | 0 | 2 |
| PAK2     | chr3 | 196554136/C//T    | nonsynonymous | 0 | 2 |
| RUBCN    | chr3 | 197421364/T//C    | synonymous    | 0 | 2 |
| LMLN     | chr3 | 197703506/G//A    | nonsynonymous | 0 | 2 |
| PDE6B    | chr4 | 619806/G//A       | nonsynonymous | 0 | 2 |
| RGS12    | chr4 | 3317925/C//T      | nonsynonymous | 0 | 2 |
| WFS1     | chr4 | 6303619/G//A      | synonymous    | 0 | 2 |
| MAN2B2   | chr4 | 6588854/C//T      | nonsynonymous | 0 | 2 |
| SORCS2   | chr4 | 7738820/C//T      | synonymous    | 0 | 2 |
| ABLIM2   | chr4 | 8031410/G//A      | nonsynonymous | 0 | 2 |
| ACOX3    | chr4 | 8394094/G//A      | synonymous    | 0 | 2 |
| TRMT44   | chr4 | 8448217/A//G      | nonsynonymous | 0 | 2 |
| ZNF518B  | chr4 | 10445109/G//A     | synonymous    | 0 | 2 |
| C1QTNF7  | chr4 | 15444220/G//T     | nonsynonymous | 0 | 2 |
| CC2D2A   | chr4 | 15517628/G//A     | nonsynonymous | 0 | 2 |
| FAM184B  | chr4 | 17638188/C//T     | nonsynonymous | 0 | 2 |
| SOD3     | chr4 | 24801217/C//T     | nonsynonymous | 0 | 2 |
| PDGFRA   | chr4 | 55144660/C//A     | nonsynonymous | 0 | 2 |
| PPAT     | chr4 | 57272846/C//T     | nonsynonymous | 0 | 2 |
| NPFFR2   | chr4 | 73013562/C//T     | synonymous    | 0 | 2 |
| ANKRD17  | chr4 | 73959897/T//C     | synonymous    | 0 | 2 |
| USO1     | chr4 | 76695935/G//T     | nonsynonymous | 0 | 2 |
| WDFY3    | chr4 | 85599417/C//T     | nonsynonymous | 0 | 2 |
| WDFY3    | chr4 | 85781647/G//A     | nonsynonymous | 0 | 2 |
| GPRIN3   | chr4 | 90170733/C//T     | nonsynonymous | 0 | 2 |
| PDLIM5   | chr4 | 95496971/G//A     | nonsynonymous | 0 | 2 |
| SGMS2    | chr4 | 108820744/C//T    | nonsynonymous | 0 | 2 |
| AP1AR    | chr4 | 113184239/G//A    | synonymous    | 0 | 2 |
| ANK2     | chr4 | 114276425/C//T    | synonymous    | 0 | 2 |
| ARSJ     | chr4 | 114823957/T//C    | nonsynonymous | 0 | 2 |
| ADAD1    | chr4 | 123333813/T//C    | synonymous    | 0 | 2 |
| FAT4     | chr4 | 126238049/C//T    | synonymous    | 0 | 2 |
| SLC25A31 | chr4 | 128694556/C//T    | nonsynonymous | 0 | 2 |
| JADE1    | chr4 | 129783065/G//A    | synonymous    | 0 | 2 |
| FREM3    | chr4 | 144621516/G//A    | nonsynonymous | 0 | 2 |
| POU4F2   | chr4 | 147561183/G//A    | synonymous    | 0 | 2 |
| FAM160A1 | chr4 | 152577524/A//G    | nonsynonymous | 0 | 2 |
| DCHS2    | chr4 | 155254007/G//A    | nonsynonymous | 0 | 2 |
| GUCY1B3  | chr4 | 156721041/G//A    | synonymous    | 0 | 2 |
| CTSO     | chr4 | 156850723/G//A    | nonsynonymous | 0 | 2 |
| AADAT    | chr4 | 171008289/C//T    | nonsynonymous | 0 | 2 |
| TENM3    | chr4 | 183721222/C//T    | synonymous    | 0 | 2 |



|          |      |                |               |   |   |
|----------|------|----------------|---------------|---|---|
| STOX2    | chr4 | 184930976/C//T | nonsynonymous | 0 | 2 |
| PLEKHG4B | chr5 | 156331/C//T    | synonymous    | 0 | 2 |
| SLC6A18  | chr5 | 1232881/C//T   | nonsynonymous | 0 | 2 |
| LPCAT1   | chr5 | 1474142/G//A   | nonsynonymous | 0 | 2 |
| LPCAT1   | chr5 | 1494867/C//T   | synonymous    | 0 | 2 |
| ICE1     | chr5 | 5489358/G//A   | nonsynonymous | 0 | 2 |
| MTRR     | chr5 | 7885828/C//A   | synonymous    | 0 | 2 |
| CTNND2   | chr5 | 11117604/G//A  | synonymous    | 0 | 2 |
| TRIO     | chr5 | 14368882/C//T  | synonymous    | 0 | 2 |
| TRIO     | chr5 | 14492757/G//A  | nonsynonymous | 0 | 2 |
| FAM105A  | chr5 | 14610433/G//A  | synonymous    | 0 | 2 |
| PRDM9    | chr5 | 23524457/C//T  | nonsynonymous | 0 | 2 |
| DROSHA   | chr5 | 31483682/G//A  | nonsynonymous | 0 | 2 |
| DROSHA   | chr5 | 31526322/G//A  | nonsynonymous | 0 | 2 |
| DNAJC21  | chr5 | 34937648/C//T  | nonsynonymous | 0 | 2 |
| GDNF     | chr5 | 37815852/G//A  | synonymous    | 0 | 2 |
| ZNF131   | chr5 | 43161739/C//T  | synonymous    | 0 | 2 |
| ITGA2    | chr5 | 52344280/T//C  | nonsynonymous | 0 | 2 |
| HSPB3    | chr5 | 53751772/G//A  | synonymous    | 0 | 2 |
| ZSWIM6   | chr5 | 60837776/G//A  | synonymous    | 0 | 2 |
| DIMT1    | chr5 | 61694568/T//C  | nonsynonymous | 0 | 2 |
| SREK1    | chr5 | 65460650/G//A  | nonsynonymous | 0 | 2 |
| SREK1    | chr5 | 65465922/C//T  | nonsynonymous | 0 | 2 |
| ARHGEF28 | chr5 | 73190300/C//T  | synonymous    | 0 | 2 |
| IQGAP2   | chr5 | 75991425/G//A  | synonymous    | 0 | 2 |
| WDR41    | chr5 | 76734101/T//C  | nonsynonymous | 0 | 2 |
| JMY      | chr5 | 78610649/T//C  | synonymous    | 0 | 2 |
| CMYA5    | chr5 | 79025998/C//T  | synonymous    | 0 | 2 |
| MSH3     | chr5 | 80150074/G//A  | nonsynonymous | 0 | 2 |
| HAPLN1   | chr5 | 82937450/C//T  | synonymous    | 0 | 2 |
| ELL2     | chr5 | 95234256/G//A  | nonsynonymous | 0 | 2 |
| WDR36    | chr5 | 110432816/A//G | nonsynonymous | 0 | 2 |
| WDR36    | chr5 | 110443087/C//T | synonymous    | 0 | 2 |
| MCC      | chr5 | 112389496/C//T | nonsynonymous | 0 | 2 |
| PRR16    | chr5 | 120022211/C//T | nonsynonymous | 0 | 2 |
| PHAX     | chr5 | 125939766/C//T | nonsynonymous | 0 | 2 |
| MEGF10   | chr5 | 126732228/C//T | synonymous    | 0 | 2 |
| FBN2     | chr5 | 127674668/G//A | synonymous    | 0 | 2 |
| CXCL14   | chr5 | 134910258/G//A | synonymous    | 0 | 2 |
| PCDHA1   | chr5 | 140167558/C//T | synonymous    | 0 | 2 |
| PCDHA7   | chr5 | 140215534/G//A | synonymous    | 0 | 2 |
| PCDHA10  | chr5 | 140237744/C//T | nonsynonymous | 0 | 2 |
| PCDHA12  | chr5 | 140257249/G//A | nonsynonymous | 0 | 2 |
| PCDHA13  | chr5 | 140264013/G//A | synonymous    | 0 | 2 |
| PCDHB2   | chr5 | 140476467/C//T | nonsynonymous | 0 | 2 |
| PCDHB7   | chr5 | 140553938/G//A | nonsynonymous | 0 | 2 |
| PCDHB11  | chr5 | 140580989/C//T | nonsynonymous | 0 | 2 |
| PCDHB12  | chr5 | 140590500/C//T | nonsynonymous | 0 | 2 |
| SLC25A2  | chr5 | 140683097/C//T | synonymous    | 0 | 2 |
| PCDHGB5  | chr5 | 140778596/A//G | nonsynonymous | 0 | 2 |
| PCDHGC5  | chr5 | 140869635/A//G | synonymous    | 0 | 2 |
| ARAP3    | chr5 | 141033935/G//T | nonsynonymous | 0 | 2 |
| KIAA0141 | chr5 | 141318214/C//A | nonsynonymous | 0 | 2 |
| PCDH12   | chr5 | 141335611/G//A | synonymous    | 0 | 2 |
| ARHGAP26 | chr5 | 142311642/G//A | synonymous    | 0 | 2 |
| GRXCR2   | chr5 | 145252474/G//A | nonsynonymous | 0 | 2 |
| PPP2R2B  | chr5 | 145969776/C//A | nonsynonymous | 0 | 2 |
| PPARGC1B | chr5 | 149216434/C//A | nonsynonymous | 0 | 2 |
| CSF1R    | chr5 | 149441165/C//T | synonymous    | 0 | 2 |
| GALNT10  | chr5 | 153795373/C//T | nonsynonymous | 0 | 2 |
| LARP1    | chr5 | 154179594/C//T | nonsynonymous | 0 | 2 |
| PWWP2A   | chr5 | 159520917/G//A | nonsynonymous | 0 | 2 |
| C1QTNF2  | chr5 | 159776682/G//A | synonymous    | 0 | 2 |
| ATP10B   | chr5 | 160097657/A//G | nonsynonymous | 0 | 2 |
| WWC1     | chr5 | 167896016/C//T | synonymous    | 0 | 2 |
| RARS     | chr5 | 167922324/T//C | nonsynonymous | 0 | 2 |
| DOCK2    | chr5 | 169141391/G//A | nonsynonymous | 0 | 2 |
| DRD1     | chr5 | 174869160/C//T | nonsynonymous | 0 | 2 |
| EIF4E1B  | chr5 | 176072983/G//T | synonymous    | 0 | 2 |
| HK3      | chr5 | 176315758/A//G | nonsynonymous | 0 | 2 |

|           |      |                  |               |   |   |
|-----------|------|------------------|---------------|---|---|
| LMAN2     | chr5 | 176761318/C//T   | nonsynonymous | 0 | 2 |
| B4GALT7   | chr5 | 177035600/C//T   | nonsynonymous | 0 | 2 |
| CLK4      | chr5 | 178045682/T//C   | nonsynonymous | 0 | 2 |
| GRM6      | chr5 | 178413949/C//T   | nonsynonymous | 0 | 2 |
| SQSTM1    | chr5 | 179251192/A//G   | nonsynonymous | 0 | 2 |
| IRF4      | chr6 | 395874/C//T      | nonsynonymous | 0 | 2 |
| ECI2      | chr6 | 4117645/C//T     | nonsynonymous | 0 | 2 |
| PPP1R3G   | chr6 | 5086716/T//C     | nonsynonymous | 0 | 2 |
| HFE       | chr6 | 26091636/C//T    | synonymous    | 0 | 2 |
| HIST1H1E  | chr6 | 26156605/C//T    | synonymous    | 0 | 2 |
| HIST1H2AG | chr6 | 27100868/G//A    | synonymous    | 0 | 2 |
| ZSCAN26   | chr6 | 28239827/G//T    | nonsynonymous | 0 | 2 |
| MAS1L     | chr6 | 29455256/C//T    | nonsynonymous | 0 | 2 |
| PRRC2A    | chr6 | 31603002/C//T    | nonsynonymous | 0 | 2 |
| CFB       | chr6 | 31915554/G//A    | nonsynonymous | 0 | 2 |
| TNXB      | chr6 | 32038046/G//A    | synonymous    | 0 | 2 |
| HLA-DOB   | chr6 | 32782846/G//A    | synonymous    | 0 | 2 |
| SYNGAP1   | chr6 | 33405668/G//A    | nonsynonymous | 0 | 2 |
| ZBTB9     | chr6 | 33423975/C//T    | synonymous    | 0 | 2 |
| IP6K3     | chr6 | 33694610/C//T    | nonsynonymous | 0 | 2 |
| ANKS1A    | chr6 | 34985468/G//A    | nonsynonymous | 0 | 2 |
| ANKS1A    | chr6 | 35047660/G//A    | synonymous    | 0 | 2 |
| DEF6      | chr6 | 35280418/C//T    | nonsynonymous | 0 | 2 |
| CLPS      | chr6 | 35762986/G//A    | synonymous    | 0 | 2 |
| CMTR1     | chr6 | 37440230/C//T    | synonymous    | 0 | 2 |
| ZFAND3    | chr6 | 38029481/G//A    | synonymous    | 0 | 2 |
| TFEB      | chr6 | 41658904/C//T    | synonymous    | 0 | 2 |
| PPP2R5D   | chr6 | 42978460/C//T    | nonsynonymous | 0 | 2 |
| MEA1      | chr6 | 42980911/ACCT//A | nonsynonymous | 0 | 2 |
| TTBK1     | chr6 | 43251044/G//A    | nonsynonymous | 0 | 2 |
| POLR1C    | chr6 | 43488496/G//T    | nonsynonymous | 0 | 2 |
| TMEM151B  | chr6 | 44243253/G//A    | synonymous    | 0 | 2 |
| TDRD6     | chr6 | 46655966/G//T    | nonsynonymous | 0 | 2 |
| ANKRD66   | chr6 | 46721477/G//A    | nonsynonymous | 0 | 2 |
| ADGRF5    | chr6 | 46834818/C//T    | nonsynonymous | 0 | 2 |
| ADGRF1    | chr6 | 46984453/A//G    | synonymous    | 0 | 2 |
| OPN5      | chr6 | 47763121/C//T    | nonsynonymous | 0 | 2 |
| TFAP2B    | chr6 | 50810989/G//A    | nonsynonymous | 0 | 2 |
| MCM3      | chr6 | 52144299/G//A    | synonymous    | 0 | 2 |
| GCM1      | chr6 | 52999120/G//A    | synonymous    | 0 | 2 |
| LRRC1     | chr6 | 53778689/G//A    | nonsynonymous | 0 | 2 |
| KCNQ5     | chr6 | 73904551/C//T    | nonsynonymous | 0 | 2 |
| CD109     | chr6 | 74519763/C//T    | nonsynonymous | 0 | 2 |
| MDN1      | chr6 | 90382036/C//A    | nonsynonymous | 0 | 2 |
| CASP8AP2  | chr6 | 90578058/C//T    | synonymous    | 0 | 2 |
| TSTD3     | chr6 | 99979245/C//T    | nonsynonymous | 0 | 2 |
| SIM1      | chr6 | 100868667/T//A   | nonsynonymous | 0 | 2 |
| SIM1      | chr6 | 100895212/G//A   | synonymous    | 0 | 2 |
| SCML4     | chr6 | 108042146/C//T   | nonsynonymous | 0 | 2 |
| SEC63     | chr6 | 108224188/C//T   | nonsynonymous | 0 | 2 |
| ARMC2     | chr6 | 109274427/G//A   | synonymous    | 0 | 2 |
| MFSD4B    | chr6 | 111587534/A//G   | nonsynonymous | 0 | 2 |
| GOPC      | chr6 | 117894771/T//C   | synonymous    | 0 | 2 |
| TPD52L1   | chr6 | 125583981/C//T   | nonsynonymous | 0 | 2 |
| MED23     | chr6 | 131923402/T//C   | nonsynonymous | 0 | 2 |
| IFNGR1    | chr6 | 137519545/C//T   | nonsynonymous | 0 | 2 |
| NHSL1     | chr6 | 138745241/C//T   | nonsynonymous | 0 | 2 |
| NHSL1     | chr6 | 138745520/C//T   | nonsynonymous | 0 | 2 |
| UTRN      | chr6 | 144794859/G//A   | nonsynonymous | 0 | 2 |
| PLEKHG1   | chr6 | 151152558/C//A   | nonsynonymous | 0 | 2 |
| AKAP12    | chr6 | 151671536/G//A   | synonymous    | 0 | 2 |
| SYNE1     | chr6 | 152651168/C//T   | synonymous    | 0 | 2 |
| SYNE1     | chr6 | 152688391/C//T   | nonsynonymous | 0 | 2 |
| TAGAP     | chr6 | 159457414/G//A   | synonymous    | 0 | 2 |
| GPR31     | chr6 | 167570665/G//A   | nonsynonymous | 0 | 2 |
| ERMARD    | chr6 | 170176775/C//T   | synonymous    | 0 | 2 |
| ERMARD    | chr6 | 170181558/A//C   | nonsynonymous | 0 | 2 |
| DLL1      | chr6 | 170597536/G//A   | nonsynonymous | 0 | 2 |
| DNAAF5    | chr7 | 814702/G//A      | synonymous    | 0 | 2 |
| GPB1      | chr7 | 1131813/G//T     | nonsynonymous | 0 | 2 |

|           |      |                |               |   |   |
|-----------|------|----------------|---------------|---|---|
| GPHER1    | chr7 | 1132095/C//T   | nonsynonymous | 0 | 2 |
| INTS1     | chr7 | 1518071/C//T   | nonsynonymous | 0 | 2 |
| INTS1     | chr7 | 1542763/C//T   | synonymous    | 0 | 2 |
| CARD11    | chr7 | 2946339/C//T   | nonsynonymous | 0 | 2 |
| FBXL18    | chr7 | 5540809/C//T   | nonsynonymous | 0 | 2 |
| FBXL18    | chr7 | 5541425/C//T   | nonsynonymous | 0 | 2 |
| USP42     | chr7 | 6193714/G//A   | synonymous    | 0 | 2 |
| FAM220A   | chr7 | 6370486/C//T   | synonymous    | 0 | 2 |
| C7orf26   | chr7 | 6639512/T//C   | synonymous    | 0 | 2 |
| GLCCI1    | chr7 | 8126132/G//T   | nonsynonymous | 0 | 2 |
| VWDE      | chr7 | 12409215/G//A  | nonsynonymous | 0 | 2 |
| DGKB      | chr7 | 14724985/G//A  | synonymous    | 0 | 2 |
| HDAC9     | chr7 | 18687629/A//G  | synonymous    | 0 | 2 |
| MACC1     | chr7 | 20201439/T//G  | nonsynonymous | 0 | 2 |
| NFE2L3    | chr7 | 26224957/A//G  | nonsynonymous | 0 | 2 |
| HOXA1     | chr7 | 27135386/C//T  | nonsynonymous | 0 | 2 |
|           | chr7 | 29519791/A//G  | synonymous    | 0 | 2 |
| NOD1      | chr7 | 30492035/C//T  | nonsynonymous | 0 | 2 |
| CRHR2     | chr7 | 30695572/C//T  | synonymous    | 0 | 2 |
| BMPER     | chr7 | 34118464/C//T  | synonymous    | 0 | 2 |
| EEDP1     | chr7 | 36338647/G//A  | synonymous    | 0 | 2 |
| AOAH      | chr7 | 36571781/T//C  | nonsynonymous | 0 | 2 |
| AMPH      | chr7 | 38431481/C//T  | synonymous    | 0 | 2 |
| HECW1     | chr7 | 43447306/C//T  | synonymous    | 0 | 2 |
| AEBP1     | chr7 | 44152298/G//A  | nonsynonymous | 0 | 2 |
| NPC1L1    | chr7 | 44578946/C//T  | synonymous    | 0 | 2 |
| MYO1G     | chr7 | 45007334/G//A  | nonsynonymous | 0 | 2 |
| CCM2      | chr7 | 45104079/G//A  | synonymous    | 0 | 2 |
| ADCY1     | chr7 | 45632428/G//A  | nonsynonymous | 0 | 2 |
| UPP1      | chr7 | 48141448/C//T  | nonsynonymous | 0 | 2 |
| ABCA13    | chr7 | 48390322/C//A  | synonymous    | 0 | 2 |
| POM121L12 | chr7 | 53103907/G//A  | synonymous    | 0 | 2 |
| PSPH      | chr7 | 56087301/G//A  | synonymous    | 0 | 2 |
| TRIM50    | chr7 | 72734178/C//T  | nonsynonymous | 0 | 2 |
| FZD9      | chr7 | 72848989/G//A  | nonsynonymous | 0 | 2 |
| GTF2IRD1  | chr7 | 73932543/G//A  | nonsynonymous | 0 | 2 |
| GTF2IRD1  | chr7 | 74005220/C//T  | nonsynonymous | 0 | 2 |
| TMEM120A  | chr7 | 75617060/G//A  | nonsynonymous | 0 | 2 |
| MAGI2     | chr7 | 77762214/G//A  | synonymous    | 0 | 2 |
| SRI       | chr7 | 87838694/G//A  | synonymous    | 0 | 2 |
| GTPBP10   | chr7 | 90014301/G//A  | nonsynonymous | 0 | 2 |
| AKAP9     | chr7 | 91708659/C//T  | synonymous    | 0 | 2 |
| LMTK2     | chr7 | 97834784/G//A  | nonsynonymous | 0 | 2 |
| TECPR1    | chr7 | 97860657/A//G  | nonsynonymous | 0 | 2 |
| NPTX2     | chr7 | 98254445/C//T  | synonymous    | 0 | 2 |
| TRRAP     | chr7 | 98606091/C//T  | synonymous    | 0 | 2 |
| SMURF1    | chr7 | 98643415/G//A  | nonsynonymous | 0 | 2 |
| NYAP1     | chr7 | 100086994/C//A | synonymous    | 0 | 2 |
| ACTL6B    | chr7 | 100246418/C//T | nonsynonymous | 0 | 2 |
| ZAN       | chr7 | 100385658/G//A | nonsynonymous | 0 | 2 |
| CUX1      | chr7 | 101845347/A//G | nonsynonymous | 0 | 2 |
| PIK3CG    | chr7 | 106509677/G//A | synonymous    | 0 | 2 |
| SLC26A3   | chr7 | 107417074/T//A | synonymous    | 0 | 2 |
| LAMB1     | chr7 | 107601664/G//A | nonsynonymous | 0 | 2 |
| PPP1R3A   | chr7 | 113519199/G//T | nonsynonymous | 0 | 2 |
| MET       | chr7 | 116414986/C//A | nonsynonymous | 0 | 2 |
| CTTNBP2   | chr7 | 117431724/C//A | nonsynonymous | 0 | 2 |
| AASS      | chr7 | 121741474/C//T | nonsynonymous | 0 | 2 |
| CADPS2    | chr7 | 122027158/G//A | synonymous    | 0 | 2 |
| GPR37     | chr7 | 124404177/A//T | nonsynonymous | 0 | 2 |
| OPN1SW    | chr7 | 128414648/G//A | synonymous    | 0 | 2 |
| TSPAN33   | chr7 | 128806708/C//T | synonymous    | 0 | 2 |
| SMO       | chr7 | 128851571/A//G | nonsynonymous | 0 | 2 |
| PLXNA4    | chr7 | 131825574/C//T | synonymous    | 0 | 2 |
| PLXNA4    | chr7 | 131895797/G//A | nonsynonymous | 0 | 2 |
| ATP6V0A4  | chr7 | 138430005/G//A | synonymous    | 0 | 2 |
| CLEC2L    | chr7 | 139221053/C//T | nonsynonymous | 0 | 2 |
| BRAF      | chr7 | 140501350/G//A | nonsynonymous | 0 | 2 |
| PRSS1     | chr7 | 142459627/G//A | nonsynonymous | 0 | 2 |
| TRPV6     | chr7 | 142573641/A//G | nonsynonymous | 0 | 2 |

|          |      |                |               |   |   |
|----------|------|----------------|---------------|---|---|
| TRPV5    | chr7 | 142626668/A//G | synonymous    | 0 | 2 |
| CLCN1    | chr7 | 143027948/G//A | nonsynonymous | 0 | 2 |
| ZYX      | chr7 | 143087676/C//T | synonymous    | 0 | 2 |
| ZNF212   | chr7 | 148951153/A//G | nonsynonymous | 0 | 2 |
| SSPO     | chr7 | 149497422/G//A | nonsynonymous | 0 | 2 |
| ASIC3    | chr7 | 150746024/C//T | nonsynonymous | 0 | 2 |
| SLC4A2   | chr7 | 150772423/C//T | synonymous    | 0 | 2 |
| ABCF2    | chr7 | 150920903/G//A | nonsynonymous | 0 | 2 |
| ZNF596   | chr8 | 192995/A//G    | nonsynonymous | 0 | 2 |
| CSMD1    | chr8 | 3000088/G//A   | nonsynonymous | 0 | 2 |
| AGPAT5   | chr8 | 6614816/C//T   | synonymous    | 0 | 2 |
| MSRA     | chr8 | 10285674/G//A  | nonsynonymous | 0 | 2 |
| C8orf74  | chr8 | 10558013/G//A  | synonymous    | 0 | 2 |
| NEIL2    | chr8 | 11637363/G//A  | nonsynonymous | 0 | 2 |
| DLC1     | chr8 | 12957249/C//T  | nonsynonymous | 0 | 2 |
| INTS10   | chr8 | 19690804/C//T  | nonsynonymous | 0 | 2 |
| ATP6V1B2 | chr8 | 20068778/G//A  | nonsynonymous | 0 | 2 |
| DOK2     | chr8 | 21767026/G//A  | synonymous    | 0 | 2 |
| SORBS3   | chr8 | 22428640/G//A  | nonsynonymous | 0 | 2 |
| DOCK5    | chr8 | 25159867/G//A  | synonymous    | 0 | 2 |
| SCARA3   | chr8 | 27516497/C//A  | synonymous    | 0 | 2 |
| KIF13B   | chr8 | 28974353/G//A  | nonsynonymous | 0 | 2 |
| DCTN6    | chr8 | 30038139/G//A  | nonsynonymous | 0 | 2 |
| WRN      | chr8 | 31014947/G//A  | nonsynonymous | 0 | 2 |
|          | chr8 | 32600250/C//T  | synonymous    | 0 | 2 |
| WHSC1L1  | chr8 | 38162915/C//T  | nonsynonymous | 0 | 2 |
| ADAM9    | chr8 | 38899582/C//A  | synonymous    | 0 | 2 |
| KAT6A    | chr8 | 41789986/T//C  | nonsynonymous | 0 | 2 |
| KAT6A    | chr8 | 41844985/A//C  | nonsynonymous | 0 | 2 |
| POTEA    | chr8 | 43147879/C//T  | synonymous    | 0 | 2 |
| PRKDC    | chr8 | 48739379/G//A  | nonsynonymous | 0 | 2 |
| RB1CC1   | chr8 | 53558352/T//C  | synonymous    | 0 | 2 |
| OPRK1    | chr8 | 54142384/C//T  | nonsynonymous | 0 | 2 |
| XKR4     | chr8 | 56270333/A//G  | nonsynonymous | 0 | 2 |
| ASPH     | chr8 | 62415937/C//T  | nonsynonymous | 0 | 2 |
| PSKH2    | chr8 | 87081839/C//T  | nonsynonymous | 0 | 2 |
| GEM      | chr8 | 95272706/C//T  | nonsynonymous | 0 | 2 |
| KIAA1429 | chr8 | 95503886/C//T  | nonsynonymous | 0 | 2 |
| CPQ      | chr8 | 98041654/C//T  | nonsynonymous | 0 | 2 |
| SPAG1    | chr8 | 101232558/G//T | nonsynonymous | 0 | 2 |
| PKHD1L1  | chr8 | 110464495/G//A | nonsynonymous | 0 | 2 |
| SYBU     | chr8 | 110587662/G//A | nonsynonymous | 0 | 2 |
| RAD21    | chr8 | 117864799/C//T | nonsynonymous | 0 | 2 |
| COL14A1  | chr8 | 121256226/G//A | nonsynonymous | 0 | 2 |
| KLHL38   | chr8 | 124658238/G//T | nonsynonymous | 0 | 2 |
| TRIB1    | chr8 | 126445785/G//A | nonsynonymous | 0 | 2 |
| EFR3A    | chr8 | 132982819/G//A | nonsynonymous | 0 | 2 |
| KCNQ3    | chr8 | 133141590/C//T | synonymous    | 0 | 2 |
| ZFAT     | chr8 | 135490788/G//A | synonymous    | 0 | 2 |
| KCNK9    | chr8 | 140630726/G//T | synonymous    | 0 | 2 |
| DENND3   | chr8 | 142178613/C//T | nonsynonymous | 0 | 2 |
| CYP11B2  | chr8 | 143994722/G//A | nonsynonymous | 0 | 2 |
| TOP1MT   | chr8 | 144407645/C//A | nonsynonymous | 0 | 2 |
|          | chr8 | 144671525/C//T | synonymous    | 0 | 2 |
| CCDC166  | chr8 | 144789883/G//A | nonsynonymous | 0 | 2 |
| MAPK15   | chr8 | 144798571/C//T | synonymous    | 0 | 2 |
| FAM83H   | chr8 | 144810191/G//A | synonymous    | 0 | 2 |
| FAM83H   | chr8 | 144810228/C//T | nonsynonymous | 0 | 2 |
| SCRIB    | chr8 | 144885852/G//A | nonsynonymous | 0 | 2 |
| EPPK1    | chr8 | 144945186/G//A | nonsynonymous | 0 | 2 |
| MROH1    | chr8 | 145255402/G//A | nonsynonymous | 0 | 2 |
| TONSL    | chr8 | 145665825/C//T | nonsynonymous | 0 | 2 |
| SMARCA2  | chr9 | 2086866/G//A   | nonsynonymous | 0 | 2 |
| JAK2     | chr9 | 5073782/G//A   | nonsynonymous | 0 | 2 |
| RIC1     | chr9 | 5763525/G//A   | nonsynonymous | 0 | 2 |
| MLANA    | chr9 | 5892525/C//T   | synonymous    | 0 | 2 |
| GLDC     | chr9 | 6602197/G//A   | nonsynonymous | 0 | 2 |
| NFIB     | chr9 | 14146701/G//A  | synonymous    | 0 | 2 |
| FREM1    | chr9 | 14747343/C//T  | synonymous    | 0 | 2 |
| TTC39B   | chr9 | 15307161/G//T  | nonsynonymous | 0 | 2 |

|            |       |                |               |   |   |
|------------|-------|----------------|---------------|---|---|
| ADAMTSL1   | chr9  | 18675909/C//T  | synonymous    | 0 | 2 |
| ELAVL2     | chr9  | 23762155/C//T  | synonymous    | 0 | 2 |
| AQP3       | chr9  | 33443780/G//A  | synonymous    | 0 | 2 |
| KIAA1161   | chr9  | 34372695/G//A  | nonsynonymous | 0 | 2 |
| CD72       | chr9  | 35615933/C//T  | synonymous    | 0 | 2 |
| TLN1       | chr9  | 35717288/G//T  | synonymous    | 0 | 2 |
| ZNF658     | chr9  | 40784534/C//T  | nonsynonymous | 0 | 2 |
| PRKACG     | chr9  | 71628604/G//A  | synonymous    | 0 | 2 |
| TRPM3      | chr9  | 73150903/G//A  | nonsynonymous | 0 | 2 |
| GDA        | chr9  | 74817659/G//A  | nonsynonymous | 0 | 2 |
| PCSK5      | chr9  | 78682947/G//A  | nonsynonymous | 0 | 2 |
| PRUNE2     | chr9  | 79320987/G//T  | nonsynonymous | 0 | 2 |
| GNAQ       | chr9  | 80537236/C//T  | synonymous    | 0 | 2 |
| UBQLN1     | chr9  | 86279960/G//A  | nonsynonymous | 0 | 2 |
| SPATA31E1  | chr9  | 90497949/C//A  | nonsynonymous | 0 | 2 |
| CENPP      | chr9  | 95375395/C//T  | synonymous    | 0 | 2 |
| NINJ1      | chr9  | 95887337/G//A  | synonymous    | 0 | 2 |
| PHF2       | chr9  | 96427988/C//T  | nonsynonymous | 0 | 2 |
| TRMO       | chr9  | 100667175/C//T | nonsynonymous | 0 | 2 |
| INVS       | chr9  | 102988437/C//T | nonsynonymous | 0 | 2 |
| CYLC2      | chr9  | 105767054/G//T | nonsynonymous | 0 | 2 |
| OR13C8     | chr9  | 107331777/C//T | nonsynonymous | 0 | 2 |
| ZNF883     | chr9  | 115759645/G//A | nonsynonymous | 0 | 2 |
| RNF183     | chr9  | 116059984/G//A | nonsynonymous | 0 | 2 |
| WHRN       | chr9  | 117186653/G//A | synonymous    | 0 | 2 |
| TNC        | chr9  | 117819616/G//A | synonymous    | 0 | 2 |
| PHF19      | chr9  | 123632128/C//T | nonsynonymous | 0 | 2 |
| GSN        | chr9  | 124076269/G//A | nonsynonymous | 0 | 2 |
|            | chr9  | 126164083/C//T | synonymous    | 0 | 2 |
| RALGPS1    | chr9  | 129724598/C//T | synonymous    | 0 | 2 |
| CFAP157    | chr9  | 130475408/C//A | nonsynonymous | 0 | 2 |
| LCN2       | chr9  | 130912643/G//A | nonsynonymous | 0 | 2 |
| GOLGA2     | chr9  | 131022740/G//A | synonymous    | 0 | 2 |
| PKN3       | chr9  | 131469674/C//T | synonymous    | 0 | 2 |
| SH3GLB2    | chr9  | 131783434/G//A | synonymous    | 0 | 2 |
| PRRC2B     | chr9  | 134357816/A//T | nonsynonymous | 0 | 2 |
| POMT1      | chr9  | 134388668/C//T | synonymous    | 0 | 2 |
| NTNG2      | chr9  | 135073926/G//A | nonsynonymous | 0 | 2 |
| CFAP77     | chr9  | 135374097/C//T | nonsynonymous | 0 | 2 |
| GTF3C5     | chr9  | 135933334/C//T | synonymous    | 0 | 2 |
| DBH        | chr9  | 136508690/C//T | synonymous    | 0 | 2 |
| OLFM1      | chr9  | 138011487/C//T | synonymous    | 0 | 2 |
| LCN1       | chr9  | 138413404/C//A | nonsynonymous | 0 | 2 |
| KCNT1      | chr9  | 138648714/C//T | synonymous    | 0 | 2 |
| UBAC1      | chr9  | 138836905/C//T | nonsynonymous | 0 | 2 |
| QSOX2      | chr9  | 139108571/G//A | synonymous    | 0 | 2 |
| NOTCH1     | chr9  | 139391420/C//T | synonymous    | 0 | 2 |
| FBXW5      | chr9  | 139835491/G//A | synonymous    | 0 | 2 |
| NPDC1      | chr9  | 139935011/G//A | synonymous    | 0 | 2 |
| ANAPC2     | chr9  | 140080722/C//T | nonsynonymous | 0 | 2 |
| SSNA1      | chr9  | 140083536/A//G | nonsynonymous | 0 | 2 |
| EXD3       | chr9  | 140204144/G//A | synonymous    | 0 | 2 |
| ARRDC1-AS1 | chr9  | 140510143/G//A | synonymous    | 0 | 2 |
| CACNA1B    | chr9  | 140865850/G//A | nonsynonymous | 0 | 2 |
| CACNA1B    | chr9  | 140952557/A//G | nonsynonymous | 0 | 2 |
| CACNA1B    | chr9  | 140952699/C//T | synonymous    | 0 | 2 |
| CACNA1B    | chr9  | 140968449/G//A | synonymous    | 0 | 2 |
| ADARB2     | chr10 | 1405265/G//A   | synonymous    | 0 | 2 |
| ADARB2     | chr10 | 1405675/C//T   | nonsynonymous | 0 | 2 |
| PITRM1     | chr10 | 3200272/C//T   | nonsynonymous | 0 | 2 |
| IL15RA     | chr10 | 6008166/G//A   | synonymous    | 0 | 2 |
| ITIH5      | chr10 | 7618596/G//A   | nonsynonymous | 0 | 2 |
| ITIH2      | chr10 | 7780627/G//A   | synonymous    | 0 | 2 |
| UPF2       | chr10 | 11994247/C//T  | nonsynonymous | 0 | 2 |
| UCMA       | chr10 | 13275743/G//A  | nonsynonymous | 0 | 2 |
| FRMD4A     | chr10 | 13735925/C//T  | nonsynonymous | 0 | 2 |
| SKIDA1     | chr10 | 21804267/G//A  | nonsynonymous | 0 | 2 |
| ARMC3      | chr10 | 23250949/G//A  | nonsynonymous | 0 | 2 |
| ANKRD26    | chr10 | 27328913/G//A  | nonsynonymous | 0 | 2 |
| ARMC4      | chr10 | 28149592/C//T  | nonsynonymous | 0 | 2 |

|          |       |                |               |   |   |
|----------|-------|----------------|---------------|---|---|
| MTPAP    | chr10 | 30625741/G//A  | synonymous    | 0 | 2 |
| PARD3    | chr10 | 34420422/C//T  | nonsynonymous | 0 | 2 |
| PARD3    | chr10 | 34759020/T//A  | nonsynonymous | 0 | 2 |
|          | chr10 | 35456687/C//T  | synonymous    | 0 | 2 |
| ANKRD30A | chr10 | 37482193/T//C  | synonymous    | 0 | 2 |
| RET      | chr10 | 43610086/G//A  | nonsynonymous | 0 | 2 |
| FXYD4    | chr10 | 43869149/C//T  | synonymous    | 0 | 2 |
| C10orf10 | chr10 | 45473258/C//T  | nonsynonymous | 0 | 2 |
| GPRIN2   | chr10 | 46999202/C//T  | nonsynonymous | 0 | 2 |
| RBP3     | chr10 | 48390514/G//A  | nonsynonymous | 0 | 2 |
| GDF10    | chr10 | 48429469/C//T  | synonymous    | 0 | 2 |
| ARHGAP22 | chr10 | 49654545/C//T  | synonymous    | 0 | 2 |
| WDFY4    | chr10 | 49988012/G//A  | nonsynonymous | 0 | 2 |
| WDFY4    | chr10 | 50025390/C//T  | nonsynonymous | 0 | 2 |
| C10orf71 | chr10 | 50534659/G//A  | nonsynonymous | 0 | 2 |
| OGDHL    | chr10 | 50953527/G//A  | nonsynonymous | 0 | 2 |
| RHOBTB1  | chr10 | 62671216/G//A  | nonsynonymous | 0 | 2 |
| RHOBTB1  | chr10 | 62671280/G//A  | synonymous    | 0 | 2 |
| COL13A1  | chr10 | 71686853/C//T  | nonsynonymous | 0 | 2 |
| DNAJB12  | chr10 | 74104849/G//A  | nonsynonymous | 0 | 2 |
| ZSWIM8   | chr10 | 75548539/G//A  | nonsynonymous | 0 | 2 |
| KCNMA1   | chr10 | 78669755/G//A  | nonsynonymous | 0 | 2 |
|          | chr10 | 82173622/C//T  | synonymous    | 0 | 2 |
| SH2D4B   | chr10 | 82298247/C//A  | nonsynonymous | 0 | 2 |
| CDHR1    | chr10 | 85971411/A//G  | nonsynonymous | 0 | 2 |
| LRIT2    | chr10 | 85984362/G//A  | nonsynonymous | 0 | 2 |
| LDB3     | chr10 | 88485941/G//A  | nonsynonymous | 0 | 2 |
| SORBS1   | chr10 | 97096333/C//T  | nonsynonymous | 0 | 2 |
| SORBS1   | chr10 | 97143773/G//A  | nonsynonymous | 0 | 2 |
| RRP12    | chr10 | 99139502/C//T  | nonsynonymous | 0 | 2 |
| ZFYVE27  | chr10 | 99508078/G//A  | nonsynonymous | 0 | 2 |
| SFRP5    | chr10 | 99527417/G//A  | nonsynonymous | 0 | 2 |
| LOXL4    | chr10 | 100020707/C//T | nonsynonymous | 0 | 2 |
| CNNM1    | chr10 | 101090683/C//T | synonymous    | 0 | 2 |
| ABCC2    | chr10 | 101590172/G//A | nonsynonymous | 0 | 2 |
| LDB1     | chr10 | 103868933/C//T | synonymous    | 0 | 2 |
| GBF1     | chr10 | 104119976/C//T | nonsynonymous | 0 | 2 |
| FBXL15   | chr10 | 104181837/C//A | synonymous    | 0 | 2 |
| HABP2    | chr10 | 115344049/G//A | synonymous    | 0 | 2 |
| DCLRE1A  | chr10 | 115610251/C//T | nonsynonymous | 0 | 2 |
| PRLHR    | chr10 | 120354098/C//T | nonsynonymous | 0 | 2 |
| EIF3A    | chr10 | 120825050/G//A | nonsynonymous | 0 | 2 |
| ATE1     | chr10 | 123503355/G//A | nonsynonymous | 0 | 2 |
| IKZF5    | chr10 | 124753609/C//T | nonsynonymous | 0 | 2 |
|          | chr10 | 126715188/C//A | synonymous    | 0 | 2 |
| MKI67    | chr10 | 129897386/G//A | synonymous    | 0 | 2 |
| MKI67    | chr10 | 129904842/C//A | nonsynonymous | 0 | 2 |
| C10orf91 | chr10 | 134259251/G//A | synonymous    | 0 | 2 |
| B4GALNT4 | chr11 | 379669/G//A    | nonsynonymous | 0 | 2 |
| B4GALNT4 | chr11 | 380184/G//A    | synonymous    | 0 | 2 |
| PKP3     | chr11 | 404684/G//A    | synonymous    | 0 | 2 |
| LRRC56   | chr11 | 551689/G//A    | nonsynonymous | 0 | 2 |
| SLC25A22 | chr11 | 793561/G//A    | synonymous    | 0 | 2 |
| KRTAP5-1 | chr11 | 1605789/C//T   | nonsynonymous | 0 | 2 |
| OSBPL5   | chr11 | 3114849/C//T   | synonymous    | 0 | 2 |
| MRGPRG   | chr11 | 3239272/C//T   | nonsynonymous | 0 | 2 |
| ARFIP2   | chr11 | 6501638/A//C   | nonsynonymous | 0 | 2 |
| ZNF214   | chr11 | 7023941/T//C   | synonymous    | 0 | 2 |
| RBMXL2   | chr11 | 7110448/C//T   | nonsynonymous | 0 | 2 |
| CYB5R2   | chr11 | 7694029/T//C   | nonsynonymous | 0 | 2 |
| DENND5A  | chr11 | 9165680/G//A   | nonsynonymous | 0 | 2 |
| SBF2     | chr11 | 10022513/G//A  | nonsynonymous | 0 | 2 |
| GALNT18  | chr11 | 11314641/G//A  | nonsynonymous | 0 | 2 |
| TEAD1    | chr11 | 12923505/G//A  | nonsynonymous | 0 | 2 |
| INSC     | chr11 | 15198703/C//T  | nonsynonymous | 0 | 2 |
| MRGPRX4  | chr11 | 18195449/G//A  | nonsynonymous | 0 | 2 |
| NELL1    | chr11 | 21250929/G//A  | nonsynonymous | 0 | 2 |
| C11orf74 | chr11 | 36669698/C//T  | nonsynonymous | 0 | 2 |
| LRP4     | chr11 | 46924362/G//A  | synonymous    | 0 | 2 |
| NDUFS3   | chr11 | 47603710/C//T  | nonsynonymous | 0 | 2 |

|          |       |                |               |   |   |
|----------|-------|----------------|---------------|---|---|
| TRIM49B  | chr11 | 49053261/C//A  | nonsynonymous | 0 | 2 |
| TRIM49B  | chr11 | 49059392/C//T  | nonsynonymous | 0 | 2 |
| TRIM64C  | chr11 | 49080540/C//T  | nonsynonymous | 0 | 2 |
| OR8U8    | chr11 | 56143251/C//T  | nonsynonymous | 0 | 2 |
| ZDHHC5   | chr11 | 57466712/C//T  | nonsynonymous | 0 | 2 |
| OR9I1    | chr11 | 57886281/G//A  | synonymous    | 0 | 2 |
| DTX4     | chr11 | 58949795/G//A  | nonsynonymous | 0 | 2 |
| MS4A4A   | chr11 | 60068501/G//A  | nonsynonymous | 0 | 2 |
| TMEM138  | chr11 | 61136107/G//A  | nonsynonymous | 0 | 2 |
| AHNAK    | chr11 | 62284193/A//G  | synonymous    | 0 | 2 |
| LRRN4CL  | chr11 | 62455775/G//A  | nonsynonymous | 0 | 2 |
| TAF6L    | chr11 | 62546400/C//T  | nonsynonymous | 0 | 2 |
| TMEM223  | chr11 | 62558383/G//A  | synonymous    | 0 | 2 |
| SLC22A6  | chr11 | 62747054/G//A  | nonsynonymous | 0 | 2 |
| SLC22A6  | chr11 | 62751925/G//A  | nonsynonymous | 0 | 2 |
| PLCB3    | chr11 | 64026410/C//T  | nonsynonymous | 0 | 2 |
| PLCB3    | chr11 | 64030200/C//T  | nonsynonymous | 0 | 2 |
| NRXN2    | chr11 | 64394007/G//A  | nonsynonymous | 0 | 2 |
| MEN1     | chr11 | 64571764/C//T  | synonymous    | 0 | 2 |
| CDC42BPG | chr11 | 64608108/G//A  | nonsynonymous | 0 | 2 |
| FRMD8    | chr11 | 65164417/C//T  | synonymous    | 0 | 2 |
| LTBP3    | chr11 | 65310589/G//A  | synonymous    | 0 | 2 |
| EFEMP2   | chr11 | 65635353/C//T  | synonymous    | 0 | 2 |
| CATSPER1 | chr11 | 65793525/C//T  | nonsynonymous | 0 | 2 |
| RAB1B    | chr11 | 66039857/C//T  | nonsynonymous | 0 | 2 |
| PELI3    | chr11 | 66241212/G//A  | nonsynonymous | 0 | 2 |
| CCDC87   | chr11 | 66360527/G//A  | synonymous    | 0 | 2 |
| SPTBN2   | chr11 | 66472741/G//A  | nonsynonymous | 0 | 2 |
| SPTBN2   | chr11 | 66476435/G//A  | nonsynonymous | 0 | 2 |
| SPTBN2   | chr11 | 66483361/G//A  | synonymous    | 0 | 2 |
| GRK2     | chr11 | 67048933/C//T  | synonymous    | 0 | 2 |
| PITPNM1  | chr11 | 67267593/G//A  | nonsynonymous | 0 | 2 |
| TBX10    | chr11 | 67401799/G//A  | nonsynonymous | 0 | 2 |
| C11orf24 | chr11 | 68029455/A//G  | synonymous    | 0 | 2 |
| LRP5     | chr11 | 68192764/C//T  | synonymous    | 0 | 2 |
| CPT1A    | chr11 | 68548192/C//T  | synonymous    | 0 | 2 |
| MRGPRF   | chr11 | 68772896/G//A  | synonymous    | 0 | 2 |
| FGF3     | chr11 | 69625252/G//A  | nonsynonymous | 0 | 2 |
| SHANK2   | chr11 | 70506047/G//A  | synonymous    | 0 | 2 |
| FAM86C1  | chr11 | 71507065/G//A  | synonymous    | 0 | 2 |
| NUMA1    | chr11 | 71729533/G//A  | nonsynonymous | 0 | 2 |
| P2RY6    | chr11 | 73007862/G//A  | nonsynonymous | 0 | 2 |
| UCP3     | chr11 | 73718000/C//T  | nonsynonymous | 0 | 2 |
| XRRA1    | chr11 | 74562149/C//T  | nonsynonymous | 0 | 2 |
| THAP12   | chr11 | 76061857/G//A  | synonymous    | 0 | 2 |
| EMSY     | chr11 | 76169274/G//A  | nonsynonymous | 0 | 2 |
| CCDC90B  | chr11 | 82985784/C//A  | nonsynonymous | 0 | 2 |
| DLG2     | chr11 | 83252900/C//T  | nonsynonymous | 0 | 2 |
| GRM5     | chr11 | 88300321/G//A  | nonsynonymous | 0 | 2 |
| FAT3     | chr11 | 92526087/C//T  | nonsynonymous | 0 | 2 |
| MTNR1B   | chr11 | 92715012/A//G  | nonsynonymous | 0 | 2 |
| AMOTL1   | chr11 | 94563358/G//A  | nonsynonymous | 0 | 2 |
| TRPC6    | chr11 | 101375399/G//A | nonsynonymous | 0 | 2 |
| GRIA4    | chr11 | 105795276/T//C | nonsynonymous | 0 | 2 |
| SLC35F2  | chr11 | 107673871/G//A | synonymous    | 0 | 2 |
| NCAM1    | chr11 | 113075144/C//T | synonymous    | 0 | 2 |
| ANKK1    | chr11 | 113269866/C//T | nonsynonymous | 0 | 2 |
| REXO2    | chr11 | 114314650/G//A | nonsynonymous | 0 | 2 |
| IL10RA   | chr11 | 117864097/C//A | nonsynonymous | 0 | 2 |
| PHLDB1   | chr11 | 118527475/G//A | nonsynonymous | 0 | 2 |
| TREH     | chr11 | 118530640/A//G | nonsynonymous | 0 | 2 |
| NLRX1    | chr11 | 119045182/T//C | synonymous    | 0 | 2 |
| TMEM136  | chr11 | 120198259/C//T | nonsynonymous | 0 | 2 |
| ARHGEF12 | chr11 | 120318617/T//C | nonsynonymous | 0 | 2 |
| CRTAM    | chr11 | 122720827/C//T | nonsynonymous | 0 | 2 |
| C11orf63 | chr11 | 122828072/C//T | nonsynonymous | 0 | 2 |
| SCN3B    | chr11 | 123513204/C//T | nonsynonymous | 0 | 2 |
| SRPRA    | chr11 | 126134397/C//T | synonymous    | 0 | 2 |
| KCNJ1    | chr11 | 128709546/C//T | nonsynonymous | 0 | 2 |
|          | chr11 | 128807494/C//T | synonymous    | 0 | 2 |

|          |       |                |               |   |   |
|----------|-------|----------------|---------------|---|---|
| ARHGAP32 | chr11 | 128840874/G//A | nonsynonymous | 0 | 2 |
| ARHGAP32 | chr11 | 128844502/C//T | nonsynonymous | 0 | 2 |
| NFRKB    | chr11 | 129756216/C//T | nonsynonymous | 0 | 2 |
| IGSF9B   | chr11 | 133795735/C//T | nonsynonymous | 0 | 2 |
| NINJ2    | chr12 | 674532/G//A    | nonsynonymous | 0 | 2 |
| WNT5B    | chr12 | 1755163/G//A   | synonymous    | 0 | 2 |
| CACNA1C  | chr12 | 2714278/C//T   | nonsynonymous | 0 | 2 |
| CACNA1C  | chr12 | 2775934/C//T   | nonsynonymous | 0 | 2 |
| VWF      | chr12 | 6128864/C//T   | synonymous    | 0 | 2 |
| TAPBPL   | chr12 | 6562860/C//T   | synonymous    | 0 | 2 |
| TAPBPL   | chr12 | 6567981/G//A   | nonsynonymous | 0 | 2 |
| CHD4     | chr12 | 6702703/G//A   | nonsynonymous | 0 | 2 |
| ATN1     | chr12 | 7046503/C//A   | synonymous    | 0 | 2 |
| A2ML1    | chr12 | 9016535/G//A   | synonymous    | 0 | 2 |
| CLEC1A   | chr12 | 10224005/C//A  | nonsynonymous | 0 | 2 |
| EPS8     | chr12 | 15807121/C//T  | nonsynonymous | 0 | 2 |
| PIK3C2G  | chr12 | 18658225/G//A  | nonsynonymous | 0 | 2 |
| ST8SIA1  | chr12 | 22440139/C//T  | nonsynonymous | 0 | 2 |
| SOX5     | chr12 | 23818479/G//A  | nonsynonymous | 0 | 2 |
| LRMP     | chr12 | 25236399/C//T  | nonsynonymous | 0 | 2 |
| AMN1     | chr12 | 31882048/G//A  | synonymous    | 0 | 2 |
| KMT2D    | chr12 | 49431640/G//A  | nonsynonymous | 0 | 2 |
| FAM186A  | chr12 | 50727706/G//A  | synonymous    | 0 | 2 |
| TMPRSS12 | chr12 | 51236808/G//A  | nonsynonymous | 0 | 2 |
| SLC4A8   | chr12 | 51879575/G//A  | nonsynonymous | 0 | 2 |
| ACVR1B   | chr12 | 52370312/C//T  | nonsynonymous | 0 | 2 |
| KRT81    | chr12 | 52681089/G//A  | synonymous    | 0 | 2 |
| KRT86    | chr12 | 52700070/T//A  | synonymous    | 0 | 2 |
| KRT84    | chr12 | 52772147/C//A  | nonsynonymous | 0 | 2 |
| KRT5     | chr12 | 52908758/T//A  | nonsynonymous | 0 | 2 |
| KRT71    | chr12 | 52943925/C//T  | nonsynonymous | 0 | 2 |
| KRT2     | chr12 | 53041558/C//T  | nonsynonymous | 0 | 2 |
| KRT3     | chr12 | 53185037/G//A  | synonymous    | 0 | 2 |
| KRT79    | chr12 | 53215714/G//A  | nonsynonymous | 0 | 2 |
| NPFF     | chr12 | 53900912/T//C  | synonymous    | 0 | 2 |
| ANKRD52  | chr12 | 56647936/G//A  | nonsynonymous | 0 | 2 |
| SRGAP1   | chr12 | 64377776/G//T  | synonymous    | 0 | 2 |
| LEMD3    | chr12 | 65633992/C//T  | synonymous    | 0 | 2 |
| LRRC10   | chr12 | 70003992/C//T  | synonymous    | 0 | 2 |
| PTPRB    | chr12 | 70933438/A//G  | synonymous    | 0 | 2 |
| PTPRQ    | chr12 | 81007382/C//A  | nonsynonymous | 0 | 2 |
| CCER1    | chr12 | 91348012/G//A  | nonsynonymous | 0 | 2 |
| CEP83    | chr12 | 94725499/G//A  | nonsynonymous | 0 | 2 |
| NR2C1    | chr12 | 95445560/G//A  | nonsynonymous | 0 | 2 |
| METAP2   | chr12 | 95879695/C//T  | synonymous    | 0 | 2 |
| SCYL2    | chr12 | 100704846/C//T | nonsynonymous | 0 | 2 |
| SLC17A8  | chr12 | 100774601/G//A | nonsynonymous | 0 | 2 |
| SLC5A8   | chr12 | 101603549/G//A | synonymous    | 0 | 2 |
| UTP20    | chr12 | 101705872/G//T | nonsynonymous | 0 | 2 |
| CMKLR1   | chr12 | 108686412/C//T | nonsynonymous | 0 | 2 |
| SELPLG   | chr12 | 109016787/G//T | synonymous    | 0 | 2 |
| SELPLG   | chr12 | 109017772/C//T | synonymous    | 0 | 2 |
| DAO      | chr12 | 109278846/C//T | nonsynonymous | 0 | 2 |
| MMAB     | chr12 | 109999241/G//A | nonsynonymous | 0 | 2 |
| MVK      | chr12 | 110028579/G//A | synonymous    | 0 | 2 |
| TCHP     | chr12 | 110345437/T//C | nonsynonymous | 0 | 2 |
| SH2B3    | chr12 | 111885823/C//A | nonsynonymous | 0 | 2 |
| ATXN2    | chr12 | 111923067/A//G | synonymous    | 0 | 2 |
| BRAP     | chr12 | 112097155/G//A | synonymous    | 0 | 2 |
| FBXW8    | chr12 | 117426663/G//A | nonsynonymous | 0 | 2 |
| FBXO21   | chr12 | 117612586/G//A | synonymous    | 0 | 2 |
| KSR2     | chr12 | 118298140/G//A | nonsynonymous | 0 | 2 |
| CIT      | chr12 | 120128209/C//T | nonsynonymous | 0 | 2 |
| GATC     | chr12 | 120894978/C//T | synonymous    | 0 | 2 |
| KDM2B    | chr12 | 121947522/C//T | nonsynonymous | 0 | 2 |
| BCL7A    | chr12 | 122468625/G//A | nonsynonymous | 0 | 2 |
| PITPNM2  | chr12 | 123481031/G//T | nonsynonymous | 0 | 2 |
| TCTN2    | chr12 | 124184297/G//A | nonsynonymous | 0 | 2 |
| DNAH10   | chr12 | 124402166/G//A | nonsynonymous | 0 | 2 |
| DNAH10   | chr12 | 124414233/C//T | nonsynonymous | 0 | 2 |



|          |       |                |               |   |   |
|----------|-------|----------------|---------------|---|---|
| AACS     | chr12 | 125613927/G//A | synonymous    | 0 | 2 |
| GLT1D1   | chr12 | 129431955/G//A | synonymous    | 0 | 2 |
| MMP17    | chr12 | 132335658/C//A | nonsynonymous | 0 | 2 |
| PUS1     | chr12 | 132426160/A//G | nonsynonymous | 0 | 2 |
| PUS1     | chr12 | 132426358/C//T | synonymous    | 0 | 2 |
| P2RX2    | chr12 | 133197906/G//A | nonsynonymous | 0 | 2 |
| POLE     | chr12 | 133226471/G//A | nonsynonymous | 0 | 2 |
| PXMP2    | chr12 | 133272574/G//A | nonsynonymous | 0 | 2 |
| TUBA3C   | chr13 | 19748265/G//T  | nonsynonymous | 0 | 2 |
| FGF9     | chr13 | 22255181/G//A  | nonsynonymous | 0 | 2 |
| SPATA13  | chr13 | 24823618/G//A  | synonymous    | 0 | 2 |
| RNF17    | chr13 | 25363492/C//T  | nonsynonymous | 0 | 2 |
| ATP8A2   | chr13 | 26125492/C//T  | nonsynonymous | 0 | 2 |
| LNX2     | chr13 | 28155508/T//C  | synonymous    | 0 | 2 |
| RFC3     | chr13 | 34395350/C//T  | nonsynonymous | 0 | 2 |
| NBEA     | chr13 | 36245124/A//G  | nonsynonymous | 0 | 2 |
| SMAD9    | chr13 | 37422955/C//T  | nonsynonymous | 0 | 2 |
| SUPT20H  | chr13 | 37622057/G//A  | nonsynonymous | 0 | 2 |
| MTRF1    | chr13 | 41814546/G//A  | nonsynonymous | 0 | 2 |
| DNAJC15  | chr13 | 43643080/C//T  | nonsynonymous | 0 | 2 |
| NUFIP1   | chr13 | 45523896/T//C  | nonsynonymous | 0 | 2 |
| SLC25A30 | chr13 | 45970135/C//T  | nonsynonymous | 0 | 2 |
| SPERT    | chr13 | 46287518/C//T  | nonsynonymous | 0 | 2 |
| SIAH3    | chr13 | 46357973/G//A  | nonsynonymous | 0 | 2 |
| ZC3H13   | chr13 | 46563172/G//A  | synonymous    | 0 | 2 |
| ESD      | chr13 | 47351614/G//A  | nonsynonymous | 0 | 2 |
| ARL11    | chr13 | 50205037/C//T  | nonsynonymous | 0 | 2 |
| SERPINE3 | chr13 | 51915353/C//T  | synonymous    | 0 | 2 |
| SERPINE3 | chr13 | 51918597/G//A  | nonsynonymous | 0 | 2 |
| CKAP2    | chr13 | 53036581/C//T  | nonsynonymous | 0 | 2 |
| PCDH17   | chr13 | 58208729/G//A  | synonymous    | 0 | 2 |
| GPC5     | chr13 | 92380905/T//C  | synonymous    | 0 | 2 |
| ABCC4    | chr13 | 95705359/G//A  | nonsynonymous | 0 | 2 |
| MBNL2    | chr13 | 97995346/C//A  | nonsynonymous | 0 | 2 |
| FARP1    | chr13 | 99098350/A//G  | nonsynonymous | 0 | 2 |
| SLC15A1  | chr13 | 99340750/G//A  | synonymous    | 0 | 2 |
| ZIC5     | chr13 | 100624006/C//A | synonymous    | 0 | 2 |
| GGACT    | chr13 | 101184754/C//T | nonsynonymous | 0 | 2 |
| CCDC168  | chr13 | 103390167/C//A | nonsynonymous | 0 | 2 |
| MYO16    | chr13 | 109672199/T//C | synonymous    | 0 | 2 |
| COL4A1   | chr13 | 110833684/C//T | synonymous    | 0 | 2 |
| COL4A2   | chr13 | 111155778/C//T | nonsynonymous | 0 | 2 |
| ANKRD10  | chr13 | 111532193/C//T | nonsynonymous | 0 | 2 |
| ARHGEF7  | chr13 | 111927931/C//T | nonsynonymous | 0 | 2 |
| MCF2L    | chr13 | 113719372/G//A | synonymous    | 0 | 2 |
| TEP1     | chr14 | 20836641/G//A  | synonymous    | 0 | 2 |
| KLHL33   | chr14 | 20898551/C//T  | nonsynonymous | 0 | 2 |
| NDRG2    | chr14 | 21487317/C//T  | nonsynonymous | 0 | 2 |
| ZNF219   | chr14 | 21559624/C//T  | nonsynonymous | 0 | 2 |
| LRP10    | chr14 | 23346393/G//A  | nonsynonymous | 0 | 2 |
| REM2     | chr14 | 23352466/C//T  | synonymous    | 0 | 2 |
| PRMT5    | chr14 | 23397808/T//C  | nonsynonymous | 0 | 2 |
| EFS      | chr14 | 23826425/C//A  | synonymous    | 0 | 2 |
| EFS      | chr14 | 23828095/G//A  | nonsynonymous | 0 | 2 |
| EFS      | chr14 | 23829051/C//T  | synonymous    | 0 | 2 |
| MHRT     | chr14 | 23886423/G//A  | synonymous    | 0 | 2 |
| MYH7     | chr14 | 23899793/G//A  | synonymous    | 0 | 2 |
| ZFH2     | chr14 | 23994299/C//T  | nonsynonymous | 0 | 2 |
| AP1G2    | chr14 | 24033256/G//A  | nonsynonymous | 0 | 2 |
| CPNE6    | chr14 | 24545577/G//A  | nonsynonymous | 0 | 2 |
| DCAF11   | chr14 | 24584867/C//T  | nonsynonymous | 0 | 2 |
| ADCY4    | chr14 | 24795367/G//A  | nonsynonymous | 0 | 2 |
| NFATC4   | chr14 | 24845773/C//A  | nonsynonymous | 0 | 2 |
| STRN3    | chr14 | 31381313/G//A  | nonsynonymous | 0 | 2 |
| RALGAPA1 | chr14 | 36143846/T//C  | nonsynonymous | 0 | 2 |
| FAM179B  | chr14 | 45433489/C//T  | nonsynonymous | 0 | 2 |
| ATP5S    | chr14 | 50792433/T//A  | nonsynonymous | 0 | 2 |
| NIN      | chr14 | 51224413/G//A  | nonsynonymous | 0 | 2 |
| TMX1     | chr14 | 51713832/C//T  | nonsynonymous | 0 | 2 |
| BMP4     | chr14 | 54417562/G//A  | nonsynonymous | 0 | 2 |

|         |       |                |               |   |   |
|---------|-------|----------------|---------------|---|---|
| SAMD4A  | chr14 | 55241681/C//T  | nonsynonymous | 0 | 2 |
| PELI2   | chr14 | 56763647/C//T  | synonymous    | 0 | 2 |
| SYNE2   | chr14 | 64545210/A//G  | synonymous    | 0 | 2 |
| SYNE2   | chr14 | 64593399/C//T  | synonymous    | 0 | 2 |
| ESR2    | chr14 | 64727411/G//A  | synonymous    | 0 | 2 |
| MTHFD1  | chr14 | 64908984/C//T  | nonsynonymous | 0 | 2 |
| SPTB    | chr14 | 65249177/G//A  | nonsynonymous | 0 | 2 |
| SPTB    | chr14 | 65266525/G//A  | nonsynonymous | 0 | 2 |
| EXD2    | chr14 | 69704478/G//A  | synonymous    | 0 | 2 |
| GALNT16 | chr14 | 69795289/G//C  | nonsynonymous | 0 | 2 |
| SLC39A9 | chr14 | 69890814/C//T  | nonsynonymous | 0 | 2 |
| PROX2   | chr14 | 75321889/C//T  | synonymous    | 0 | 2 |
| CIPC    | chr14 | 77572171/G//A  | synonymous    | 0 | 2 |
| NOXRED1 | chr14 | 77872282/G//T  | synonymous    | 0 | 2 |
| NRXN3   | chr14 | 79175831/G//A  | nonsynonymous | 0 | 2 |
| NRXN3   | chr14 | 79270067/C//T  | nonsynonymous | 0 | 2 |
| FLRT2   | chr14 | 86089128/C//T  | nonsynonymous | 0 | 2 |
| ZC3H14  | chr14 | 89030023/T//G  | nonsynonymous | 0 | 2 |
| ZC3H14  | chr14 | 89068286/C//T  | nonsynonymous | 0 | 2 |
| NRDE2   | chr14 | 90744664/G//A  | synonymous    | 0 | 2 |
| SLC24A4 | chr14 | 92908448/G//A  | nonsynonymous | 0 | 2 |
| ITPK1   | chr14 | 93407858/G//A  | synonymous    | 0 | 2 |
| UNC79   | chr14 | 94069683/C//T  | nonsynonymous | 0 | 2 |
| UNC79   | chr14 | 94083610/G//A  | nonsynonymous | 0 | 2 |
| BDKRB2  | chr14 | 96703496/G//A  | nonsynonymous | 0 | 2 |
| BCL11B  | chr14 | 99641923/G//A  | nonsynonymous | 0 | 2 |
| CYP46A1 | chr14 | 100157473/G//A | nonsynonymous | 0 | 2 |
| RTL1    | chr14 | 101347803/C//T | nonsynonymous | 0 | 2 |
| RTL1    | chr14 | 101351094/G//A | nonsynonymous | 0 | 2 |
| DYNC1H1 | chr14 | 102505491/C//T | nonsynonymous | 0 | 2 |
| CINP    | chr14 | 102825778/C//T | nonsynonymous | 0 | 2 |
| TECPR2  | chr14 | 102891388/G//A | synonymous    | 0 | 2 |
| KLC1    | chr14 | 104145843/C//T | synonymous    | 0 | 2 |
| KIF26A  | chr14 | 104638991/G//A | nonsynonymous | 0 | 2 |
| KIF26A  | chr14 | 104642879/A//G | nonsynonymous | 0 | 2 |
| AKT1    | chr14 | 105236655/G//A | synonymous    | 0 | 2 |
| AHNAK2  | chr14 | 105411829/G//A | nonsynonymous | 0 | 2 |
| AHNAK2  | chr14 | 105411932/C//G | nonsynonymous | 0 | 2 |
| AHNAK2  | chr14 | 105412263/G//A | synonymous    | 0 | 2 |
| AHNAK2  | chr14 | 105420774/C//A | synonymous    | 0 | 2 |
| PACS2   | chr14 | 105834860/C//T | nonsynonymous | 0 | 2 |
| CYFIP1  | chr15 | 22940794/C//T  | synonymous    | 0 | 2 |
| GABRA5  | chr15 | 27185209/G//A  | nonsynonymous | 0 | 2 |
| OCA2    | chr15 | 28202839/C//T  | nonsynonymous | 0 | 2 |
| OCA2    | chr15 | 28270047/G//A  | nonsynonymous | 0 | 2 |
|         | chr15 | 31362183/G//A  | synonymous    | 0 | 2 |
| OTUD7A  | chr15 | 31779675/G//A  | synonymous    | 0 | 2 |
| SLC12A6 | chr15 | 34549914/G//A  | nonsynonymous | 0 | 2 |
| NUTM1   | chr15 | 34648103/G//A  | nonsynonymous | 0 | 2 |
| GJD2    | chr15 | 35044897/T//C  | nonsynonymous | 0 | 2 |
| EXD1    | chr15 | 41501704/G//A  | synonymous    | 0 | 2 |
| NDUFAF1 | chr15 | 41688934/C//T  | synonymous    | 0 | 2 |
| MAPKBP1 | chr15 | 42104310/C//T  | synonymous    | 0 | 2 |
| TMEM87A | chr15 | 42519026/G//A  | nonsynonymous | 0 | 2 |
| EPB42   | chr15 | 43503645/C//T  | nonsynonymous | 0 | 2 |
| TGM5    | chr15 | 43527663/G//A  | synonymous    | 0 | 2 |
| TUBGCP4 | chr15 | 43695964/G//A  | synonymous    | 0 | 2 |
| TP53BP1 | chr15 | 43767762/C//T  | nonsynonymous | 0 | 2 |
| MAP1A   | chr15 | 43818200/C//A  | nonsynonymous | 0 | 2 |
| DUOX2   | chr15 | 45388081/C//T  | nonsynonymous | 0 | 2 |
|         | chr15 | 45411248/G//A  | synonymous    | 0 | 2 |
| DUOX1   | chr15 | 45444127/C//T  | nonsynonymous | 0 | 2 |
| HDC     | chr15 | 50546389/G//A  | nonsynonymous | 0 | 2 |
| MYO5C   | chr15 | 52487584/C//T  | nonsynonymous | 0 | 2 |
| WDR72   | chr15 | 53992134/A//G  | synonymous    | 0 | 2 |
| PRTG    | chr15 | 55971599/G//A  | nonsynonymous | 0 | 2 |
| TCF12   | chr15 | 57565358/C//T  | nonsynonymous | 0 | 2 |
| CGNL1   | chr15 | 57816920/C//T  | nonsynonymous | 0 | 2 |
| CCNB2   | chr15 | 59406777/C//T  | synonymous    | 0 | 2 |
| VPS13C  | chr15 | 62174893/G//A  | nonsynonymous | 0 | 2 |

|             |       |                      |               |   |   |
|-------------|-------|----------------------|---------------|---|---|
| VPS13C      | chr15 | 62219414/G//A        | nonsynonymous | 0 | 2 |
| CA12        | chr15 | 63637822/C//T        | synonymous    | 0 | 2 |
| DAPK2       | chr15 | 64218220/G//A        | synonymous    | 0 | 2 |
| UACA        | chr15 | 70976621/G//A        | nonsynonymous | 0 | 2 |
| THSD4       | chr15 | 72069784/C//T        | synonymous    | 0 | 2 |
| NR2E3       | chr15 | 72105812/G//A        | synonymous    | 0 | 2 |
| PML         | chr15 | 74325692/G//A        | nonsynonymous | 0 | 2 |
| ISLR2       | chr15 | 74426468/G//A        | nonsynonymous | 0 | 2 |
| ACSBG1      | chr15 | 78474329/G//A        | synonymous    | 0 | 2 |
| DNAJA4      | chr15 | 78566648/C//T        | synonymous    | 0 | 2 |
| ABHD17C     | chr15 | 81041981/C//T        | nonsynonymous | 0 | 2 |
| AKAP13      | chr15 | 86278308/C//T        | synonymous    | 0 | 2 |
| ACAN        | chr15 | 89381906/C//T        | nonsynonymous | 0 | 2 |
| ACAN        | chr15 | 89381931/G//A        | synonymous    | 0 | 2 |
| HAPLN3      | chr15 | 89422332/G//A        | nonsynonymous | 0 | 2 |
| IQGAP1      | chr15 | 91020406/G//A        | synonymous    | 0 | 2 |
| IGF1R       | chr15 | 99486166/C//T        | nonsynonymous | 0 | 2 |
| ADAMTS17    | chr15 | 100591783/C//T       | nonsynonymous | 0 | 2 |
| LRRK1       | chr15 | 101562104/G//T       | nonsynonymous | 0 | 2 |
| CHSY1       | chr15 | 101775564/C//T       | nonsynonymous | 0 | 2 |
| RHBDF1      | chr16 | 109251/C//T          | nonsynonymous | 0 | 2 |
| FAM234A     | chr16 | 314043/C//T          | nonsynonymous | 0 | 2 |
| RGS11       | chr16 | 319368/G//A          | nonsynonymous | 0 | 2 |
| CAPN15      | chr16 | 597834/GCCCGCCAGC//G | nonsynonymous | 0 | 2 |
| RHOT2       | chr16 | 720472/T//C          | nonsynonymous | 0 | 2 |
| BAIAP3      | chr16 | 1397936/C//T         | nonsynonymous | 0 | 2 |
| CLCN7       | chr16 | 1497053/C//T         | nonsynonymous | 0 | 2 |
| CLCN7       | chr16 | 1498415/T//C         | nonsynonymous | 0 | 2 |
| CLCN7       | chr16 | 1502802/C//T         | nonsynonymous | 0 | 2 |
| EME2        | chr16 | 1825645/G//A         | nonsynonymous | 0 | 2 |
| TSC2        | chr16 | 2122238/G//A         | synonymous    | 0 | 2 |
| RNPS1       | chr16 | 2313103/C//T         | nonsynonymous | 0 | 2 |
| TBC1D24     | chr16 | 2547065/G//A         | nonsynonymous | 0 | 2 |
| SRRM2       | chr16 | 2815594/C//T         | nonsynonymous | 0 | 2 |
| SRRM2       | chr16 | 2816224/C//T         | nonsynonymous | 0 | 2 |
| FLYWCH1     | chr16 | 2988325/C//T         | nonsynonymous | 0 | 2 |
| PAQR4       | chr16 | 3021806/C//T         | nonsynonymous | 0 | 2 |
| PKMYT1      | chr16 | 3024311/G//A         | nonsynonymous | 0 | 2 |
| MEFV        | chr16 | 3299521/G//A         | synonymous    | 0 | 2 |
| NLRC3       | chr16 | 3614763/C//T         | synonymous    | 0 | 2 |
| TRAP1       | chr16 | 3740965/C//T         | nonsynonymous | 0 | 2 |
| CREBBP      | chr16 | 3820616/C//T         | synonymous    | 0 | 2 |
| GLIS2       | chr16 | 4382446/G//A         | synonymous    | 0 | 2 |
| CORO7-PAM16 | chr16 | 4438021/C//T         | nonsynonymous | 0 | 2 |
| UBALD1      | chr16 | 4659508/C//T         | synonymous    | 0 | 2 |
| GLYR1       | chr16 | 4873881/C//T         | nonsynonymous | 0 | 2 |
| PPL         | chr16 | 4933333/G//A         | synonymous    | 0 | 2 |
| SEC14L5     | chr16 | 5041924/G//A         | nonsynonymous | 0 | 2 |
| PARN        | chr16 | 14693804/T//C        | nonsynonymous | 0 | 2 |
| SMG1        | chr16 | 18823089/A//G        | synonymous    | 0 | 2 |
| SMG1        | chr16 | 18863401/C//T        | synonymous    | 0 | 2 |
| UMOD        | chr16 | 20359827/C//T        | nonsynonymous | 0 | 2 |
| EEF2K       | chr16 | 22237178/C//T        | nonsynonymous | 0 | 2 |
| USP31       | chr16 | 23093817/G//A        | nonsynonymous | 0 | 2 |
| CACNG3      | chr16 | 24358104/T//C        | synonymous    | 0 | 2 |
| AQP8        | chr16 | 25232848/C//A        | nonsynonymous | 0 | 2 |
| HS3ST4      | chr16 | 26147031/C//T        | nonsynonymous | 0 | 2 |
| HS3ST4      | chr16 | 26147454/G//A        | nonsynonymous | 0 | 2 |
| GTF3C1      | chr16 | 27500493/G//A        | synonymous    | 0 | 2 |
| C16orf92    | chr16 | 30035070/G//A        | synonymous    | 0 | 2 |
| CD2BP2      | chr16 | 30364373/C//T        | nonsynonymous | 0 | 2 |
| TBC1D10B    | chr16 | 30371083/C//T        | nonsynonymous | 0 | 2 |
| ZNF48       | chr16 | 30407099/A//G        | nonsynonymous | 0 | 2 |
| ZNF771      | chr16 | 30429192/G//A        | nonsynonymous | 0 | 2 |
| SETD1A      | chr16 | 30978852/G//A        | nonsynonymous | 0 | 2 |
| SETD1A      | chr16 | 30982725/T//C        | nonsynonymous | 0 | 2 |
| TGFB11      | chr16 | 31485194/C//T        | nonsynonymous | 0 | 2 |
| ITFG1       | chr16 | 47195721/G//A        | nonsynonymous | 0 | 2 |
| ITFG1       | chr16 | 47196506/C//A        | nonsynonymous | 0 | 2 |
| ABCC11      | chr16 | 48209244/C//T        | nonsynonymous | 0 | 2 |

|          |       |               |               |   |   |
|----------|-------|---------------|---------------|---|---|
| LONP2    | chr16 | 48304049/C//T | nonsynonymous | 0 | 2 |
| PAPD5    | chr16 | 50245299/G//A | nonsynonymous | 0 | 2 |
| NKD1     | chr16 | 50659407/C//T | synonymous    | 0 | 2 |
| NKD1     | chr16 | 50667422/C//T | synonymous    | 0 | 2 |
| IRX6     | chr16 | 55362746/C//T | nonsynonymous | 0 | 2 |
| SLC6A2   | chr16 | 55703536/A//G | nonsynonymous | 0 | 2 |
|          | chr16 | 57793059/C//T | synonymous    | 0 | 2 |
| ELMO3    | chr16 | 67235523/C//T | nonsynonymous | 0 | 2 |
| FHOD1    | chr16 | 67271561/G//A | synonymous    | 0 | 2 |
| ZDHHC1   | chr16 | 67435027/G//A | synonymous    | 0 | 2 |
| FAM65A   | chr16 | 67573806/C//T | synonymous    | 0 | 2 |
| CENPT    | chr16 | 67862225/C//T | nonsynonymous | 0 | 2 |
| SLC12A4  | chr16 | 67980372/G//A | synonymous    | 0 | 2 |
| HAS3     | chr16 | 69148767/C//T | synonymous    | 0 | 2 |
| COG8     | chr16 | 69366757/C//T | nonsynonymous | 0 | 2 |
| SF3B3    | chr16 | 70569301/G//A | nonsynonymous | 0 | 2 |
| SF3B3    | chr16 | 70597923/G//A | synonymous    | 0 | 2 |
| HYDIN    | chr16 | 71163565/T//C | nonsynonymous | 0 | 2 |
| ZFH3     | chr16 | 72831708/G//A | nonsynonymous | 0 | 2 |
| WDR59    | chr16 | 74908124/G//A | nonsynonymous | 0 | 2 |
| CDYL2    | chr16 | 80718786/G//A | synonymous    | 0 | 2 |
| BCO1     | chr16 | 81324155/C//T | synonymous    | 0 | 2 |
| MBTPS1   | chr16 | 84088051/C//T | synonymous    | 0 | 2 |
| ATP2C2   | chr16 | 84495648/G//A | nonsynonymous | 0 | 2 |
| IRF8     | chr16 | 85946798/G//A | nonsynonymous | 0 | 2 |
| FOXF1    | chr16 | 86544851/G//T | nonsynonymous | 0 | 2 |
| PIEZO1   | chr16 | 88782210/C//T | nonsynonymous | 0 | 2 |
| PIEZO1   | chr16 | 88789274/G//A | nonsynonymous | 0 | 2 |
| ACSF3    | chr16 | 89169104/G//A | synonymous    | 0 | 2 |
| CPNE7    | chr16 | 89655117/C//T | nonsynonymous | 0 | 2 |
| CDK10    | chr16 | 89758884/C//T | nonsynonymous | 0 | 2 |
| TCF25    | chr16 | 89965178/C//T | synonymous    | 0 | 2 |
| TUBB3    | chr16 | 90001622/G//A | nonsynonymous | 0 | 2 |
| RPH3AL   | chr17 | 96970/G//A    | nonsynonymous | 0 | 2 |
| SLC43A2  | chr17 | 1496473/G//A  | synonymous    | 0 | 2 |
| PRPF8    | chr17 | 1564296/C//T  | nonsynonymous | 0 | 2 |
| RPA1     | chr17 | 1779058/C//A  | synonymous    | 0 | 2 |
| RTN4RL1  | chr17 | 1840332/G//A  | nonsynonymous | 0 | 2 |
| SMG6     | chr17 | 2203334/G//A  | nonsynonymous | 0 | 2 |
| SGSM2    | chr17 | 2276772/C//T  | nonsynonymous | 0 | 2 |
| CLUH     | chr17 | 2595865/G//A  | synonymous    | 0 | 2 |
| ZZEF1    | chr17 | 3916822/C//T  | nonsynonymous | 0 | 2 |
| ANKFY1   | chr17 | 4098363/C//T  | nonsynonymous | 0 | 2 |
| MED11    | chr17 | 4635186/C//G  | nonsynonymous | 0 | 2 |
| CAMTA2   | chr17 | 4875641/A//G  | synonymous    | 0 | 2 |
| WSCD1    | chr17 | 6012920/C//A  | synonymous    | 0 | 2 |
|          | chr17 | 7121886/T//C  | synonymous    | 0 | 2 |
| DVL2     | chr17 | 7129587/C//T  | nonsynonymous | 0 | 2 |
| ELP5     | chr17 | 7160344/G//A  | nonsynonymous | 0 | 2 |
| GPS2     | chr17 | 7217802/C//G  | synonymous    | 0 | 2 |
| NEURL4   | chr17 | 7224931/C//T  | nonsynonymous | 0 | 2 |
| SPEM1    | chr17 | 7324353/G//A  | nonsynonymous | 0 | 2 |
| CHD3     | chr17 | 7804615/G//A  | synonymous    | 0 | 2 |
| CHD3     | chr17 | 7806722/C//T  | nonsynonymous | 0 | 2 |
| CHD3     | chr17 | 7808941/C//T  | nonsynonymous | 0 | 2 |
| PER1     | chr17 | 8052875/C//T  | nonsynonymous | 0 | 2 |
| MYH10    | chr17 | 8448859/G//A  | synonymous    | 0 | 2 |
| NTN1     | chr17 | 8926116/C//T  | synonymous    | 0 | 2 |
| DNAH9    | chr17 | 11648158/G//T | synonymous    | 0 | 2 |
| TRPV2    | chr17 | 16327059/C//T | nonsynonymous | 0 | 2 |
| CCDC144A | chr17 | 16667414/T//C | synonymous    | 0 | 2 |
| MPRIIP   | chr17 | 17030117/G//A | synonymous    | 0 | 2 |
| RAI1     | chr17 | 17698079/A//T | nonsynonymous | 0 | 2 |
| RAI1     | chr17 | 17700591/G//A | synonymous    | 0 | 2 |
| MYO15A   | chr17 | 18051846/C//T | nonsynonymous | 0 | 2 |
| ALKBH5   | chr17 | 18098328/G//A | nonsynonymous | 0 | 2 |
| FLII     | chr17 | 18154314/G//A | synonymous    | 0 | 2 |
| MAPK7    | chr17 | 19284605/G//A | synonymous    | 0 | 2 |
| RNF112   | chr17 | 19318388/C//T | synonymous    | 0 | 2 |
| ULK2     | chr17 | 19746541/A//G | synonymous    | 0 | 2 |

|          |       |               |               |   |   |
|----------|-------|---------------|---------------|---|---|
| KCNJ12   | chr17 | 21319254/C//T | synonymous    | 0 | 2 |
| FOXN1    | chr17 | 26851609/C//T | nonsynonymous | 0 | 2 |
| SSH2     | chr17 | 27957926/G//A | nonsynonymous | 0 | 2 |
| MYO1D    | chr17 | 30981516/C//T | nonsynonymous | 0 | 2 |
| LIG3     | chr17 | 33319026/C//A | nonsynonymous | 0 | 2 |
| SLFN13   | chr17 | 33771725/C//T | synonymous    | 0 | 2 |
| AATF     | chr17 | 35413969/G//A | synonymous    | 0 | 2 |
| GPR179   | chr17 | 36484994/G//A | synonymous    | 0 | 2 |
| GPR179   | chr17 | 36491526/G//A | nonsynonymous | 0 | 2 |
| ARHGAP23 | chr17 | 36614481/G//A | nonsynonymous | 0 | 2 |
| PNMT     | chr17 | 37825892/C//T | synonymous    | 0 | 2 |
| MED24    | chr17 | 38182539/A//G | nonsynonymous | 0 | 2 |
| KRT39    | chr17 | 39122918/C//T | nonsynonymous | 0 | 2 |
| KRT37    | chr17 | 39578450/G//T | synonymous    | 0 | 2 |
| KRT35    | chr17 | 39635733/G//A | nonsynonymous | 0 | 2 |
| GAST     | chr17 | 39871686/G//A | synonymous    | 0 | 2 |
| HAP1     | chr17 | 39881396/G//A | nonsynonymous | 0 | 2 |
| GHDC     | chr17 | 40342259/C//T | nonsynonymous | 0 | 2 |
| STAT3    | chr17 | 40491345/C//T | nonsynonymous | 0 | 2 |
| WNK4     | chr17 | 40936504/C//T | synonymous    | 0 | 2 |
| CNTD1    | chr17 | 40951222/G//A | nonsynonymous | 0 | 2 |
| DUSP3    | chr17 | 41847137/G//A | nonsynonymous | 0 | 2 |
| HDAC5    | chr17 | 42188128/C//T | synonymous    | 0 | 2 |
| FZD2     | chr17 | 42636116/C//A | nonsynonymous | 0 | 2 |
| CCDC43   | chr17 | 42759407/A//C | nonsynonymous | 0 | 2 |
| KANSL1   | chr17 | 44115975/G//A | nonsynonymous | 0 | 2 |
| KANSL1   | chr17 | 44248233/C//T | nonsynonymous | 0 | 2 |
| NGFR     | chr17 | 47588006/G//A | synonymous    | 0 | 2 |
| SPATA20  | chr17 | 48629529/C//T | nonsynonymous | 0 | 2 |
| TRIM25   | chr17 | 54985913/C//T | synonymous    | 0 | 2 |
| TSPPOAP1 | chr17 | 56395764/G//A | synonymous    | 0 | 2 |
| TSPPOAP1 | chr17 | 56396614/G//A | synonymous    | 0 | 2 |
| MTMR4    | chr17 | 56585883/A//G | nonsynonymous | 0 | 2 |
| TEX14    | chr17 | 56693650/G//A | nonsynonymous | 0 | 2 |
| MED13    | chr17 | 60042364/T//C | synonymous    | 0 | 2 |
| MAP3K3   | chr17 | 61771045/C//T | nonsynonymous | 0 | 2 |
| CSHL1    | chr17 | 61987817/G//A | nonsynonymous | 0 | 2 |
| CSHL1    | chr17 | 61988595/C//T | synonymous    | 0 | 2 |
| SCN4A    | chr17 | 62026884/G//A | nonsynonymous | 0 | 2 |
| ERN1     | chr17 | 62126408/C//T | synonymous    | 0 | 2 |
| AXIN2    | chr17 | 63532613/G//A | nonsynonymous | 0 | 2 |
| SLC16A6  | chr17 | 66270122/C//T | nonsynonymous | 0 | 2 |
| ABCA10   | chr17 | 67145200/T//C | nonsynonymous | 0 | 2 |
| SDK2     | chr17 | 71434181/C//T | nonsynonymous | 0 | 2 |
| KIF19    | chr17 | 72324574/G//A | nonsynonymous | 0 | 2 |
| KIF19    | chr17 | 72345455/C//T | nonsynonymous | 0 | 2 |
| GPR142   | chr17 | 72365658/G//T | nonsynonymous | 0 | 2 |
| OTOP3    | chr17 | 72939804/A//G | nonsynonymous | 0 | 2 |
| RECQL5   | chr17 | 73627574/G//A | synonymous    | 0 | 2 |
| UNC13D   | chr17 | 73832920/C//T | nonsynonymous | 0 | 2 |
| WBP2     | chr17 | 73847668/A//G | nonsynonymous | 0 | 2 |
| FOXJ1    | chr17 | 74133452/G//A | synonymous    | 0 | 2 |
| SPHK1    | chr17 | 74381491/T//C | synonymous    | 0 | 2 |
| RHBDF2   | chr17 | 74468801/G//A | synonymous    | 0 | 2 |
|          | chr17 | 75316383/C//T | synonymous    | 0 | 2 |
| DNAH17   | chr17 | 76455859/G//A | synonymous    | 0 | 2 |
| TIMP2    | chr17 | 76851906/G//A | nonsynonymous | 0 | 2 |
| CCDC40   | chr17 | 78063635/C//T | synonymous    | 0 | 2 |
| RNF213   | chr17 | 78268635/G//A | nonsynonymous | 0 | 2 |
| RNF213   | chr17 | 78305896/C//T | nonsynonymous | 0 | 2 |
| RNF213   | chr17 | 78314093/G//A | nonsynonymous | 0 | 2 |
| CEP131   | chr17 | 79180578/C//T | nonsynonymous | 0 | 2 |
| TEPSIN   | chr17 | 79207259/C//T | nonsynonymous | 0 | 2 |
| DLGAP1   | chr18 | 3814117/G//A  | nonsynonymous | 0 | 2 |
| DLGAP1   | chr18 | 3879421/G//A  | synonymous    | 0 | 2 |
| EPB41L3  | chr18 | 5438113/C//A  | synonymous    | 0 | 2 |
| LAMA1    | chr18 | 7017295/C//T  | synonymous    | 0 | 2 |
| LRRC30   | chr18 | 7231979/G//A  | synonymous    | 0 | 2 |
| MTCL1    | chr18 | 8826172/C//T  | nonsynonymous | 0 | 2 |
| ANKRD12  | chr18 | 9258556/C//A  | nonsynonymous | 0 | 2 |

|          |       |               |               |   |   |
|----------|-------|---------------|---------------|---|---|
| RALBP1   | chr18 | 9535807/C//T  | nonsynonymous | 0 | 2 |
| NAPG     | chr18 | 10550171/C//T | nonsynonymous | 0 | 2 |
| LAMA3    | chr18 | 21484551/C//T | nonsynonymous | 0 | 2 |
| DSG1     | chr18 | 28913647/C//T | synonymous    | 0 | 2 |
| GAREM1   | chr18 | 29867399/C//T | synonymous    | 0 | 2 |
| SLC14A2  | chr18 | 43207002/C//T | synonymous    | 0 | 2 |
| PSTPIP2  | chr18 | 43595892/C//T | nonsynonymous | 0 | 2 |
| ST8SIA5  | chr18 | 44260358/G//A | nonsynonymous | 0 | 2 |
| PIAS2    | chr18 | 44424698/T//C | synonymous    | 0 | 2 |
| MYO5B    | chr18 | 47462659/G//A | nonsynonymous | 0 | 2 |
| CXXC1    | chr18 | 47813200/G//A | nonsynonymous | 0 | 2 |
| DCC      | chr18 | 50683754/G//A | synonymous    | 0 | 2 |
| ZNF236   | chr18 | 74680263/G//A | nonsynonymous | 0 | 2 |
| ATP9B    | chr18 | 76873322/A//T | nonsynonymous | 0 | 2 |
| NFATC1   | chr18 | 77170458/G//A | synonymous    | 0 | 2 |
| MISP     | chr19 | 758304/C//T   | nonsynonymous | 0 | 2 |
| ARID3A   | chr19 | 929811/C//T   | nonsynonymous | 0 | 2 |
| ABCA7    | chr19 | 1044724/C//T  | nonsynonymous | 0 | 2 |
| ARHGAP45 | chr19 | 1080047/C//T  | nonsynonymous | 0 | 2 |
| PCSK4    | chr19 | 1482046/G//A  | synonymous    | 0 | 2 |
| PCSK4    | chr19 | 1489817/C//T  | nonsynonymous | 0 | 2 |
| SLC39A3  | chr19 | 2732908/G//A  | synonymous    | 0 | 2 |
| NFIC     | chr19 | 3453832/G//A  | synonymous    | 0 | 2 |
| DOHH     | chr19 | 3496585/G//A  | synonymous    | 0 | 2 |
| TJP3     | chr19 | 3747890/C//T  | synonymous    | 0 | 2 |
| TMIGD2   | chr19 | 4292743/C//T  | synonymous    | 0 | 2 |
| HDGFRP2  | chr19 | 4475493/G//A  | synonymous    | 0 | 2 |
| PTPRS    | chr19 | 5206800/G//A  | synonymous    | 0 | 2 |
| PTPRS    | chr19 | 5219383/G//A  | synonymous    | 0 | 2 |
| FUT5     | chr19 | 5867383/C//T  | synonymous    | 0 | 2 |
| RFX2     | chr19 | 5997093/G//A  | nonsynonymous | 0 | 2 |
| SLC25A41 | chr19 | 6430031/C//T  | nonsynonymous | 0 | 2 |
| TUBB4A   | chr19 | 6495528/C//T  | nonsynonymous | 0 | 2 |
| ARHGEF18 | chr19 | 7535154/C//T  | synonymous    | 0 | 2 |
| TIMM44   | chr19 | 7992542/C//T  | synonymous    | 0 | 2 |
| TIMM44   | chr19 | 7998383/G//A  | synonymous    | 0 | 2 |
| MUC16    | chr19 | 8999514/C//T  | nonsynonymous | 0 | 2 |
| FBXL12   | chr19 | 9922362/C//T  | nonsynonymous | 0 | 2 |
| PIN1     | chr19 | 9949167/C//T  | synonymous    | 0 | 2 |
| COL5A3   | chr19 | 10090677/C//G | nonsynonymous | 0 | 2 |
| KEAP1    | chr19 | 10602724/A//G | nonsynonymous | 0 | 2 |
| YIPF2    | chr19 | 11034643/C//T | nonsynonymous | 0 | 2 |
| SMARCA4  | chr19 | 11135038/C//T | nonsynonymous | 0 | 2 |
| ZNF627   | chr19 | 11727740/G//A | nonsynonymous | 0 | 2 |
| ZNF627   | chr19 | 11728117/C//T | nonsynonymous | 0 | 2 |
| ZNF799   | chr19 | 12502833/C//T | nonsynonymous | 0 | 2 |
| DHPS     | chr19 | 12790709/C//T | nonsynonymous | 0 | 2 |
| HOOK2    | chr19 | 12874135/G//T | synonymous    | 0 | 2 |
| HOOK2    | chr19 | 12874493/G//A | nonsynonymous | 0 | 2 |
| HOOK2    | chr19 | 12874566/C//T | synonymous    | 0 | 2 |
| TRMT1    | chr19 | 13216176/G//A | nonsynonymous | 0 | 2 |
| TRMT1    | chr19 | 13226585/G//A | synonymous    | 0 | 2 |
| ZSWIM4   | chr19 | 13923949/G//A | nonsynonymous | 0 | 2 |
| CC2D1A   | chr19 | 14034569/C//T | nonsynonymous | 0 | 2 |
| NOTCH3   | chr19 | 15280904/C//T | nonsynonymous | 0 | 2 |
| BRD4     | chr19 | 15349686/C//T | synonymous    | 0 | 2 |
| AKAP8L   | chr19 | 15512155/G//A | nonsynonymous | 0 | 2 |
| WIZ      | chr19 | 15559005/C//T | synonymous    | 0 | 2 |
| OR10H5   | chr19 | 15905651/G//A | nonsynonymous | 0 | 2 |
| OR10H5   | chr19 | 15905664/C//T | nonsynonymous | 0 | 2 |
| CYP4F2   | chr19 | 16000370/G//A | nonsynonymous | 0 | 2 |
| CYP4F11  | chr19 | 16025652/C//T | nonsynonymous | 0 | 2 |
| CPAMD8   | chr19 | 17010311/C//T | nonsynonymous | 0 | 2 |
| MYO9B    | chr19 | 17265212/G//A | nonsynonymous | 0 | 2 |
| PDE4C    | chr19 | 18343843/G//A | synonymous    | 0 | 2 |
| KIAA1683 | chr19 | 18375876/G//A | nonsynonymous | 0 | 2 |
| KIAA1683 | chr19 | 18378115/C//T | nonsynonymous | 0 | 2 |
| ISYNA1   | chr19 | 18547548/C//T | synonymous    | 0 | 2 |
| ZNF429   | chr19 | 21719918/A//C | nonsynonymous | 0 | 2 |
| ZNF43    | chr19 | 21992349/G//A | nonsynonymous | 0 | 2 |

|           |       |               |               |   |   |
|-----------|-------|---------------|---------------|---|---|
| ZNF208    | chr19 | 22154966/G//A | nonsynonymous | 0 | 2 |
| ANKRD27   | chr19 | 33116785/C//T | nonsynonymous | 0 | 2 |
| CEP89     | chr19 | 33392244/G//A | nonsynonymous | 0 | 2 |
| LRP3      | chr19 | 33697122/C//T | synonymous    | 0 | 2 |
| PEPD      | chr19 | 33878815/C//T | nonsynonymous | 0 | 2 |
| ZNF30     | chr19 | 35434709/G//A | nonsynonymous | 0 | 2 |
| SCN1B     | chr19 | 35524650/C//T | synonymous    | 0 | 2 |
|           | chr19 | 35608226/G//A | synonymous    | 0 | 2 |
| FFAR1     | chr19 | 35842685/G//A | synonymous    | 0 | 2 |
| GAPDHS    | chr19 | 36033850/C//T | synonymous    | 0 | 2 |
| KMT2B     | chr19 | 36223184/C//T | nonsynonymous | 0 | 2 |
| KMT2B     | chr19 | 36224677/C//T | nonsynonymous | 0 | 2 |
| IGFLR1    | chr19 | 36230938/C//T | nonsynonymous | 0 | 2 |
| ARHGAP33  | chr19 | 36271686/C//T | nonsynonymous | 0 | 2 |
| APLP1     | chr19 | 36361862/G//T | nonsynonymous | 0 | 2 |
| ZFP82     | chr19 | 36884709/G//A | nonsynonymous | 0 | 2 |
| ZNF850    | chr19 | 37241329/C//T | nonsynonymous | 0 | 2 |
| ZNF568    | chr19 | 37441527/G//A | nonsynonymous | 0 | 2 |
| SIPA1L3   | chr19 | 38621398/C//T | synonymous    | 0 | 2 |
| CAPN12    | chr19 | 39232422/G//A | synonymous    | 0 | 2 |
| CCER2     | chr19 | 39401701/G//A | synonymous    | 0 | 2 |
| LRFN1     | chr19 | 39804941/G//A | nonsynonymous | 0 | 2 |
| PAF1      | chr19 | 39876894/G//A | nonsynonymous | 0 | 2 |
| FCGBP     | chr19 | 40397981/C//T | nonsynonymous | 0 | 2 |
| ZNF546    | chr19 | 40521492/C//T | nonsynonymous | 0 | 2 |
| AKT2      | chr19 | 40741015/C//T | nonsynonymous | 0 | 2 |
| LTBP4     | chr19 | 41122917/G//A | nonsynonymous | 0 | 2 |
| AXL       | chr19 | 41765522/C//T | nonsynonymous | 0 | 2 |
| BCKDHA    | chr19 | 41928113/G//A | nonsynonymous | 0 | 2 |
| CEACAM5   | chr19 | 42219139/G//A | nonsynonymous | 0 | 2 |
| CEACAM3   | chr19 | 42300608/C//T | synonymous    | 0 | 2 |
| ERF       | chr19 | 42754483/C//T | nonsynonymous | 0 | 2 |
| MEGF8     | chr19 | 42848675/C//A | nonsynonymous | 0 | 2 |
| MEGF8     | chr19 | 42866653/G//A | nonsynonymous | 0 | 2 |
| IRGQ      | chr19 | 44096770/G//A | nonsynonymous | 0 | 2 |
| SMG9      | chr19 | 44252177/C//T | nonsynonymous | 0 | 2 |
| NECTIN2   | chr19 | 45375315/G//A | synonymous    | 0 | 2 |
| TOMM40    | chr19 | 45404303/C//T | nonsynonymous | 0 | 2 |
| TRAPPC6A  | chr19 | 45681430/G//C | nonsynonymous | 0 | 2 |
| MARK4     | chr19 | 45805908/G//A | synonymous    | 0 | 2 |
| ERCC2     | chr19 | 45855468/C//T | nonsynonymous | 0 | 2 |
| FBXO46    | chr19 | 46215041/G//A | synonymous    | 0 | 2 |
| DMPK      | chr19 | 46281814/C//T | nonsynonymous | 0 | 2 |
| SYMPK     | chr19 | 46329601/G//A | nonsynonymous | 0 | 2 |
| PGLYRP1   | chr19 | 46526006/C//T | nonsynonymous | 0 | 2 |
| PPP5C     | chr19 | 46857085/C//A | nonsynonymous | 0 | 2 |
| PNMAL2    | chr19 | 46997467/G//T | nonsynonymous | 0 | 2 |
| PNMAL2    | chr19 | 46997853/G//A | synonymous    | 0 | 2 |
| C5AR1     | chr19 | 47823602/G//A | nonsynonymous | 0 | 2 |
| GRIN2D    | chr19 | 48908245/C//T | synonymous    | 0 | 2 |
| NTN5      | chr19 | 49174152/G//A | nonsynonymous | 0 | 2 |
| TULP2     | chr19 | 49398656/C//T | nonsynonymous | 0 | 2 |
| HRC       | chr19 | 49657426/C//T | nonsynonymous | 0 | 2 |
| TRPM4     | chr19 | 49693531/G//A | nonsynonymous | 0 | 2 |
| TEAD2     | chr19 | 49845810/T//C | nonsynonymous | 0 | 2 |
| PRR12     | chr19 | 50128890/G//A | synonymous    | 0 | 2 |
| SCAF1     | chr19 | 50156900/C//A | nonsynonymous | 0 | 2 |
| CPT1C     | chr19 | 50204865/C//T | nonsynonymous | 0 | 2 |
| MED25     | chr19 | 50333092/G//A | nonsynonymous | 0 | 2 |
| SIGLEC11  | chr19 | 50461952/G//A | synonymous    | 0 | 2 |
| NAPSA     | chr19 | 50861862/C//T | nonsynonymous | 0 | 2 |
| POLD1     | chr19 | 50905496/G//A | synonymous    | 0 | 2 |
| MYBPC2    | chr19 | 50949184/G//A | nonsynonymous | 0 | 2 |
| SYT3      | chr19 | 51128813/C//T | nonsynonymous | 0 | 2 |
| KLK1      | chr19 | 51325005/G//A | nonsynonymous | 0 | 2 |
| SIGLEC12  | chr19 | 52002731/C//T | nonsynonymous | 0 | 2 |
| FPR3      | chr19 | 52327714/G//A | nonsynonymous | 0 | 2 |
| PPP2R1A   | chr19 | 52714686/C//T | synonymous    | 0 | 2 |
| ZNF534    | chr19 | 52941831/G//A | nonsynonymous | 0 | 2 |
| FAM90A27P | chr19 | 53786091/C//T | synonymous    | 0 | 2 |

|          |       |                 |               |   |   |
|----------|-------|-----------------|---------------|---|---|
| ZNF331   | chr19 | 54080055/C//T   | nonsynonymous | 0 | 2 |
| CNOT3    | chr19 | 54656196/G//A   | synonymous    | 0 | 2 |
| PPP1R12C | chr19 | 55602909/G//A   | synonymous    | 0 | 2 |
| KMT5C    | chr19 | 55855042/T//C   | synonymous    | 0 | 2 |
| SSC5D    | chr19 | 56011423/C//T   | nonsynonymous | 0 | 2 |
| NLRP5    | chr19 | 56538969/C//T   | nonsynonymous | 0 | 2 |
| ZSCAN5B  | chr19 | 56701936/T//C   | nonsynonymous | 0 | 2 |
| ZSCAN5A  | chr19 | 56733046/G//A   | synonymous    | 0 | 2 |
| PEG3     | chr19 | 57327119/C//A   | nonsynonymous | 0 | 2 |
| ZIK1     | chr19 | 58101682/G//A   | nonsynonymous | 0 | 2 |
| TRIM28   | chr19 | 59060583/C//A   | synonymous    | 0 | 2 |
| SDCBP2   | chr20 | 1293150/G//A    | nonsynonymous | 0 | 2 |
| SNRPB    | chr20 | 2443387/CAGG//C | nonsynonymous | 0 | 2 |
| TMC2     | chr20 | 2573021/G//T    | nonsynonymous | 0 | 2 |
| VPS16    | chr20 | 2845636/C//A    | synonymous    | 0 | 2 |
| FASTKD5  | chr20 | 3128266/T//C    | nonsynonymous | 0 | 2 |
| SLC4A11  | chr20 | 3209814/C//T    | nonsynonymous | 0 | 2 |
| PROKR2   | chr20 | 5282861/A//G    | nonsynonymous | 0 | 2 |
| TRMT6    | chr20 | 5919235/G//A    | synonymous    | 0 | 2 |
| LRRN4    | chr20 | 6021904/G//A    | nonsynonymous | 0 | 2 |
| FERMT1   | chr20 | 6060153/G//A    | nonsynonymous | 0 | 2 |
| LAMP5    | chr20 | 9510396/G//A    | nonsynonymous | 0 | 2 |
| JAG1     | chr20 | 10622245/C//T   | nonsynonymous | 0 | 2 |
| PCSK2    | chr20 | 17462599/G//A   | nonsynonymous | 0 | 2 |
| RIN2     | chr20 | 19970781/C//T   | nonsynonymous | 0 | 2 |
| RALGAPA2 | chr20 | 20586008/G//A   | nonsynonymous | 0 | 2 |
| SSTR4    | chr20 | 23016585/G//A   | synonymous    | 0 | 2 |
| NINL     | chr20 | 25459654/G//A   | synonymous    | 0 | 2 |
| REM1     | chr20 | 30072111/C//T   | nonsynonymous | 0 | 2 |
| ID1      | chr20 | 30193250/G//T   | nonsynonymous | 0 | 2 |
|          | chr20 | 30449212/G//A   | synonymous    | 0 | 2 |
| COMMD7   | chr20 | 31291215/C//T   | nonsynonymous | 0 | 2 |
| BPIFB4   | chr20 | 31671224/T//C   | nonsynonymous | 0 | 2 |
| SNTA1    | chr20 | 31998068/C//T   | synonymous    | 0 | 2 |
| E2F1     | chr20 | 32265070/C//T   | nonsynonymous | 0 | 2 |
| MYH7B    | chr20 | 33588608/C//T   | nonsynonymous | 0 | 2 |
| CEP250   | chr20 | 34085877/C//T   | synonymous    | 0 | 2 |
| SLA2     | chr20 | 35243729/C//T   | nonsynonymous | 0 | 2 |
| TGM2     | chr20 | 36784336/G//A   | nonsynonymous | 0 | 2 |
| KIAA1755 | chr20 | 36859722/G//A   | nonsynonymous | 0 | 2 |
| PPP1R16B | chr20 | 37531387/C//T   | synonymous    | 0 | 2 |
| DHX35    | chr20 | 37634984/T//C   | nonsynonymous | 0 | 2 |
| MAFB     | chr20 | 39317290/C//T   | synonymous    | 0 | 2 |
| TOP1     | chr20 | 39721132/C//A   | nonsynonymous | 0 | 2 |
| PTPRT    | chr20 | 40790065/C//T   | nonsynonymous | 0 | 2 |
| L3MBTL1  | chr20 | 42162678/A//G   | nonsynonymous | 0 | 2 |
| JPH2     | chr20 | 42747161/C//T   | synonymous    | 0 | 2 |
| HNF4A    | chr20 | 43043174/G//A   | nonsynonymous | 0 | 2 |
| HNF4A    | chr20 | 43047159/C//T   | synonymous    | 0 | 2 |
| KCNS1    | chr20 | 43727023/G//A   | synonymous    | 0 | 2 |
| MATN4    | chr20 | 43927113/G//T   | nonsynonymous | 0 | 2 |
| ACOT8    | chr20 | 44477278/C//T   | nonsynonymous | 0 | 2 |
| ZNF335   | chr20 | 44598139/C//T   | synonymous    | 0 | 2 |
| SLC12A5  | chr20 | 44680470/C//T   | nonsynonymous | 0 | 2 |
| NCOA5    | chr20 | 44698965/G//A   | synonymous    | 0 | 2 |
| PREX1    | chr20 | 47295928/C//T   | nonsynonymous | 0 | 2 |
| ZNFX1    | chr20 | 47888006/G//A   | nonsynonymous | 0 | 2 |
| ZNFX1    | chr20 | 47892414/T//C   | synonymous    | 0 | 2 |
| BCAS4    | chr20 | 49434784/C//A   | nonsynonymous | 0 | 2 |
| KCNG1    | chr20 | 49621073/G//A   | nonsynonymous | 0 | 2 |
| RBM38    | chr20 | 55982789/G//A   | nonsynonymous | 0 | 2 |
| PMEPA1   | chr20 | 56227642/C//T   | nonsynonymous | 0 | 2 |
| GNAS     | chr20 | 57429130/G//A   | synonymous    | 0 | 2 |
| ZNF831   | chr20 | 57766692/C//T   | synonymous    | 0 | 2 |
| HRH3     | chr20 | 60791420/G//A   | nonsynonymous | 0 | 2 |
| OGFR     | chr20 | 61443584/G//A   | nonsynonymous | 0 | 2 |
| COL9A3   | chr20 | 61451288/C//T   | nonsynonymous | 0 | 2 |
| DIDO1    | chr20 | 61512312/C//T   | nonsynonymous | 0 | 2 |
| DIDO1    | chr20 | 61542781/G//A   | nonsynonymous | 0 | 2 |
| GID8     | chr20 | 61572891/G//T   | nonsynonymous | 0 | 2 |



|           |       |               |               |   |   |
|-----------|-------|---------------|---------------|---|---|
| COL20A1   | chr20 | 61937317/C//T | nonsynonymous | 0 | 2 |
| EEF1A2    | chr20 | 62127247/G//A | nonsynonymous | 0 | 2 |
| HELZ2     | chr20 | 62196470/C//T | synonymous    | 0 | 2 |
| HELZ2     | chr20 | 62197378/G//A | nonsynonymous | 0 | 2 |
| GMEB2     | chr20 | 62223387/G//A | nonsynonymous | 0 | 2 |
| RTEL1     | chr20 | 62324280/C//T | synonymous    | 0 | 2 |
| ZGPAT     | chr20 | 62366035/G//A | nonsynonymous | 0 | 2 |
| UCKL1     | chr20 | 62577878/T//C | nonsynonymous | 0 | 2 |
| CHODL     | chr21 | 19629133/C//T | synonymous    | 0 | 2 |
| NCAM2     | chr21 | 22841105/G//A | nonsynonymous | 0 | 2 |
| CYYR1     | chr21 | 27852623/G//A | nonsynonymous | 0 | 2 |
| KRTAP11-1 | chr21 | 32253539/C//T | nonsynonymous | 0 | 2 |
| MRPS6     | chr21 | 35514908/C//T | synonymous    | 0 | 2 |
| PRDM15    | chr21 | 43230527/G//A | nonsynonymous | 0 | 2 |
| ZBTB21    | chr21 | 43411305/G//A | nonsynonymous | 0 | 2 |
| ABCG1     | chr21 | 43711290/C//T | synonymous    | 0 | 2 |
| TRPM2     | chr21 | 45825109/G//A | nonsynonymous | 0 | 2 |
| ITGB2     | chr21 | 46308804/G//A | synonymous    | 0 | 2 |
| FAM207A   | chr21 | 46363734/G//A | nonsynonymous | 0 | 2 |
| POFUT2    | chr21 | 46689893/G//A | synonymous    | 0 | 2 |
| COL6A1    | chr21 | 47406938/C//T | synonymous    | 0 | 2 |
| COL6A2    | chr21 | 47531946/G//A | nonsynonymous | 0 | 2 |
| FTCD      | chr21 | 47574081/C//T | nonsynonymous | 0 | 2 |
| DIP2A     | chr21 | 47965120/C//T | synonymous    | 0 | 2 |
| CCT8L2    | chr22 | 17071852/T//C | nonsynonymous | 0 | 2 |
| MICAL3    | chr22 | 18300316/G//A | nonsynonymous | 0 | 2 |
| PRODH     | chr22 | 18900740/A//C | nonsynonymous | 0 | 2 |
| CLTCL1    | chr22 | 19226881/C//A | nonsynonymous | 0 | 2 |
| TXNRD2    | chr22 | 19864625/C//T | synonymous    | 0 | 2 |
| TANGO2    | chr22 | 20052095/C//T | synonymous    | 0 | 2 |
| SLC7A4    | chr22 | 21385523/C//T | nonsynonymous | 0 | 2 |
| BCR       | chr22 | 23615871/G//T | nonsynonymous | 0 | 2 |
| SMARCB1   | chr22 | 24176339/G//A | nonsynonymous | 0 | 2 |
| CABIN1    | chr22 | 24459602/C//T | nonsynonymous | 0 | 2 |
| CABIN1    | chr22 | 24574185/G//A | synonymous    | 0 | 2 |
| SUSD2     | chr22 | 24584295/C//T | nonsynonymous | 0 | 2 |
| GGT1      | chr22 | 25011033/C//T | synonymous    | 0 | 2 |
| GGT1      | chr22 | 25016352/G//A | nonsynonymous | 0 | 2 |
| CRYBB2    | chr22 | 25623853/C//T | synonymous    | 0 | 2 |
| MYO18B    | chr22 | 26219577/G//A | nonsynonymous | 0 | 2 |
| SEZ6L     | chr22 | 26688560/G//A | nonsynonymous | 0 | 2 |
| TPST2     | chr22 | 26937137/C//T | nonsynonymous | 0 | 2 |
| TPST2     | chr22 | 26937534/C//T | synonymous    | 0 | 2 |
| TTC28     | chr22 | 28392157/C//T | nonsynonymous | 0 | 2 |
| C22orf31  | chr22 | 29456508/G//A | synonymous    | 0 | 2 |
| AP1B1     | chr22 | 29746114/G//A | nonsynonymous | 0 | 2 |
| NEFH      | chr22 | 29879545/C//T | synonymous    | 0 | 2 |
| LARGE1    | chr22 | 34022242/G//A | synonymous    | 0 | 2 |
| RBFOX2    | chr22 | 36155968/G//A | nonsynonymous | 0 | 2 |
| FOXRED2   | chr22 | 36897297/G//A | nonsynonymous | 0 | 2 |
| FOXRED2   | chr22 | 36900732/G//A | synonymous    | 0 | 2 |
| BAIAP2L2  | chr22 | 38481329/C//T | nonsynonymous | 0 | 2 |
| TMEM184B  | chr22 | 38622803/G//A | synonymous    | 0 | 2 |
| KCNJ4     | chr22 | 38823715/G//A | synonymous    | 0 | 2 |
| SGSM3     | chr22 | 40802205/C//T | nonsynonymous | 0 | 2 |
| ZC3H7B    | chr22 | 41735192/G//A | synonymous    | 0 | 2 |
| NAGA      | chr22 | 42458918/G//A | synonymous    | 0 | 2 |
| SCUBE1    | chr22 | 43603577/C//T | nonsynonymous | 0 | 2 |
| EFCAB6    | chr22 | 43985983/G//A | synonymous    | 0 | 2 |
| PNPLA5    | chr22 | 44276749/C//T | nonsynonymous | 0 | 2 |
| SAMM50    | chr22 | 44386258/G//A | nonsynonymous | 0 | 2 |
| PARVB     | chr22 | 44527442/C//T | nonsynonymous | 0 | 2 |
| NUP50     | chr22 | 45574516/A//G | synonymous    | 0 | 2 |
| TRABD     | chr22 | 50635992/C//A | nonsynonymous | 0 | 2 |
| TUBGCP6   | chr22 | 50656153/C//T | synonymous    | 0 | 2 |
| TUBGCP6   | chr22 | 50656534/C//T | synonymous    | 0 | 2 |
| TUBGCP6   | chr22 | 50656654/C//T | nonsynonymous | 0 | 2 |
| HDAC10    | chr22 | 50687124/C//T | synonymous    | 0 | 2 |
| NCAPH2    | chr22 | 50956231/C//T | nonsynonymous | 0 | 2 |
| SCO2      | chr22 | 50962301/G//A | synonymous    | 0 | 2 |

|          |       |                    |               |   |   |
|----------|-------|--------------------|---------------|---|---|
| PLCXD1   | chrX  | 205418/C//T        | nonsynonymous | 0 | 2 |
| PPP2R3B  | chrX  | 322273/G//A        | nonsynonymous | 0 | 2 |
| ASMTL    | chrX  | 1537994/T//C       | nonsynonymous | 0 | 2 |
| ASMT     | chrX  | 1734089/C//T       | synonymous    | 0 | 2 |
| MAGED1   | chrX  | 51643343/G//A      | nonsynonymous | 0 | 2 |
| HUWE1    | chrX  | 53561125/C//T      | nonsynonymous | 0 | 2 |
| AMER1    | chrX  | 63410103/G//A      | nonsynonymous | 0 | 2 |
| MTMR8    | chrX  | 63551454/C//A      | nonsynonymous | 0 | 2 |
| STARD8   | chrX  | 67942449/C//T      | synonymous    | 0 | 2 |
| FOXO4    | chrX  | 70322030/C//A      | synonymous    | 0 | 2 |
| HDX      | chrX  | 83616611/G//A      | nonsynonymous | 0 | 2 |
| GLRA4    | chrX  | 102974160/C//T     | nonsynonymous | 0 | 2 |
| CHRD1    | chrX  | 109931890/T//C     | nonsynonymous | 0 | 2 |
| PAK3     | chrX  | 110406161/G//A     | nonsynonymous | 0 | 2 |
| KLHL13   | chrX  | 117033329/C//T     | nonsynonymous | 0 | 2 |
| NKRF     | chrX  | 118724761/C//T     | synonymous    | 0 | 2 |
| ATP11C   | chrX  | 138884438/G//A     | nonsynonymous | 0 | 2 |
| MAMLD1   | chrX  | 149639108/C//T     | synonymous    | 0 | 2 |
| L1CAM    | chrX  | 153129444/G//A     | synonymous    | 0 | 2 |
| FLNA     | chrX  | 153582589/G//A     | synonymous    | 0 | 2 |
| KDM5D    | chrY  | 21869154/C//T      | nonsynonymous | 0 | 2 |
| LCE1E    | chr1  | 152760075/A//G     | synonymous    | 1 | 1 |
| GPR161   | chr1  | 168066328/C//T     | nonsynonymous | 0 | 2 |
| SWT1     | chr1  | 185240519/G//A     | nonsynonymous | 0 | 2 |
| HMCN1    | chr1  | 185902887/G//A     | nonsynonymous | 0 | 2 |
| LYST     | chr1  | 235896886/G//C     | nonsynonymous | 0 | 2 |
| GPR45    | chr2  | 105858864/G//A     | synonymous    | 0 | 2 |
| NBEAL1   | chr2  | 204000577/G//C     | nonsynonymous | 0 | 2 |
| ADAM23   | chr2  | 207413038/C//A     | nonsynonymous | 0 | 2 |
| PASK     | chr2  | 242079443/C//T     | nonsynonymous | 0 | 2 |
| TRANK1   | chr3  | 36884208/T//C      | synonymous    | 0 | 2 |
| ALS2CL   | chr3  | 46727075/C//T      | synonymous    | 0 | 2 |
| FLNB     | chr3  | 58116558/G//A      | nonsynonymous | 0 | 2 |
| CLSTN2   | chr3  | 140167507/C//T     | nonsynonymous | 0 | 2 |
| ZNF518B  | chr4  | 10446518/C//T      | nonsynonymous | 0 | 2 |
| GABRA4   | chr4  | 46979105/G//T      | nonsynonymous | 0 | 2 |
| TXK      | chr4  | 48069695/C//T      | nonsynonymous | 0 | 2 |
| KIAA1211 | chr4  | 57193837/C//T      | nonsynonymous | 0 | 2 |
| SHROOM3  | chr4  | 77661969/G//A      | synonymous    | 0 | 2 |
| ENPEP    | chr4  | 111441161/C//G     | synonymous    | 0 | 2 |
|          | chr4  | 155411654/C//T     | synonymous    | 0 | 2 |
| TERT     | chr5  | 1268691/G//T       | nonsynonymous | 0 | 2 |
| TRPC7    | chr5  | 135601916/C//A     | nonsynonymous | 0 | 2 |
| PCDHB1   | chr5  | 140431238/G//A     | synonymous    | 0 | 2 |
| PCDHGA2  | chr5  | 140719867/A//G     | synonymous    | 0 | 2 |
| BTN2A2   | chr6  | 26390936/G//A      | nonsynonymous | 0 | 2 |
| DOPEY1   | chr6  | 83835322/C//T      | nonsynonymous | 0 | 2 |
| DCBLD1   | chr6  | 117890910/C//A     | synonymous    | 0 | 2 |
| SASH1    | chr6  | 148865112/C//T     | nonsynonymous | 0 | 2 |
| SYNE1    | chr6  | 152702497/C//G     | nonsynonymous | 0 | 2 |
| FNDC1    | chr6  | 159650954/C//T     | nonsynonymous | 0 | 2 |
| GDF6     | chr8  | 97156774/C//T      | synonymous    | 0 | 2 |
| CSMD3    | chr8  | 113353912/A//G     | nonsynonymous | 0 | 2 |
| TBC1D31  | chr8  | 124096564/C//T     | nonsynonymous | 0 | 2 |
| TG       | chr8  | 133980207/G//A     | nonsynonymous | 0 | 2 |
| MPDZ     | chr9  | 13113947/C//T      | nonsynonymous | 0 | 2 |
| CKS2     | chr9  | 91930086/CATGTT//C | nonsynonymous | 0 | 2 |
| ZNF462   | chr9  | 109734437/C//T     | synonymous    | 0 | 2 |
| SUSD1    | chr9  | 114874061/G//T     | nonsynonymous | 0 | 2 |
| COL5A1   | chr9  | 137620531/G//A     | nonsynonymous | 0 | 2 |
| LHX3     | chr9  | 139092464/C//T     | nonsynonymous | 0 | 2 |
| NET1     | chr10 | 5498989/A//T       | synonymous    | 0 | 2 |
| OPTN     | chr10 | 13167560/G//C      | nonsynonymous | 0 | 2 |
| GPR158   | chr10 | 25887170/C//T      | nonsynonymous | 0 | 2 |
| SYT15    | chr10 | 46967489/G//T      | nonsynonymous | 0 | 2 |
| JMJD1C   | chr10 | 64974457/G//A      | synonymous    | 0 | 2 |
| NDST2    | chr10 | 75564562/C//T      | synonymous    | 0 | 2 |
| CFAP43   | chr10 | 105923958/C//T     | nonsynonymous | 0 | 2 |
| MUC6     | chr11 | 1016776/C//T       | nonsynonymous | 0 | 2 |
| SSRP1    | chr11 | 57100230/G//A      | nonsynonymous | 0 | 2 |

|          |       |                |               |   |   |
|----------|-------|----------------|---------------|---|---|
| FLRT1    | chr11 | 63884882/G//A  | synonymous    | 0 | 2 |
|          | chr12 | 2613691/C//T   | synonymous    | 0 | 2 |
| FGFR1OP2 | chr12 | 27117668/G//C  | synonymous    | 0 | 2 |
| KIF21A   | chr12 | 39696768/T//C  | nonsynonymous | 0 | 2 |
| PDZRN4   | chr12 | 41582464/G//A  | synonymous    | 0 | 2 |
| KRT84    | chr12 | 52771925/C//T  | nonsynonymous | 0 | 2 |
| CCER1    | chr12 | 91348463/G//A  | synonymous    | 0 | 2 |
| PITPNM2  | chr12 | 123494508/C//T | nonsynonymous | 0 | 2 |
| TMEM132C | chr12 | 129181799/G//T | nonsynonymous | 0 | 2 |
| FREM2    | chr13 | 39263318/C//T  | nonsynonymous | 0 | 2 |
| AKAP11   | chr13 | 42893308/G//A  | nonsynonymous | 0 | 2 |
| CCDC168  | chr13 | 103399942/C//T | synonymous    | 0 | 2 |
| TMCO3    | chr13 | 114203785/G//A | nonsynonymous | 0 | 2 |
| CGNL1    | chr15 | 57730331/G//A  | nonsynonymous | 0 | 2 |
| C15orf32 | chr15 | 93015500/C//T  | nonsynonymous | 0 | 2 |
| PGPEP1L  | chr15 | 99514312/C//G  | nonsynonymous | 0 | 2 |
| BAIAP3   | chr16 | 1395354/G//C   | nonsynonymous | 0 | 2 |
| MYH13    | chr17 | 10248675/C//T  | synonymous    | 0 | 2 |
| COL1A1   | chr17 | 48272117/C//T  | nonsynonymous | 0 | 2 |
| ZNF236   | chr18 | 74672718/G//A  | nonsynonymous | 0 | 2 |
| MUM1     | chr19 | 1360869/G//A   | nonsynonymous | 0 | 2 |
| MKMK2    | chr19 | 2042828/C//G   | nonsynonymous | 0 | 2 |
| NFIC     | chr19 | 3381846/C//T   | nonsynonymous | 0 | 2 |
| FBN3     | chr19 | 8131120/C//T   | nonsynonymous | 0 | 2 |
| GMIP     | chr19 | 19746370/C//T  | nonsynonymous | 0 | 2 |
| ZNF675   | chr19 | 23836886/G//T  | synonymous    | 0 | 2 |
| ZNF541   | chr19 | 48047513/C//T  | nonsynonymous | 0 | 2 |
| BPIFB4   | chr20 | 31672750/G//A  | nonsynonymous | 0 | 2 |
| MMP9     | chr20 | 44641108/C//T  | nonsynonymous | 0 | 2 |
| KCNB1    | chr20 | 48098820/G//A  | synonymous    | 0 | 2 |
| KCNG1    | chr20 | 49621205/C//T  | nonsynonymous | 0 | 2 |
| RFPL2    | chr22 | 32588988/G//A  | nonsynonymous | 0 | 2 |
| ASMTL    | chrX  | 1546924/C//T   | synonymous    | 0 | 2 |
| GRIK3    | chr1  | 37324749/G//A  | nonsynonymous | 0 | 2 |
| SZT2     | chr1  | 43911607/T//C  | synonymous    | 0 | 2 |
| PIAS3    | chr1  | 145585689/C//T | synonymous    | 0 | 2 |
| TTC24    | chr1  | 156555600/G//A | nonsynonymous | 0 | 2 |
| SPTA1    | chr1  | 158612230/C//T | nonsynonymous | 0 | 2 |
| TNN      | chr1  | 175046577/G//A | nonsynonymous | 0 | 2 |
| NMNAT2   | chr1  | 183247737/C//T | nonsynonymous | 0 | 2 |
| SLC41A1  | chr1  | 205779339/G//A | synonymous    | 0 | 2 |
| LEFTY1   | chr1  | 226075317/G//A | synonymous    | 0 | 2 |
| NRXN1    | chr2  | 50758479/G//A  | nonsynonymous | 0 | 2 |
| LRP1B    | chr2  | 141819727/G//A | synonymous    | 0 | 2 |
| CRYGB    | chr2  | 209007437/C//T | synonymous    | 0 | 2 |
| UNC80    | chr2  | 210858102/C//T | nonsynonymous | 0 | 2 |
| CCDC71   | chr3  | 49200295/G//A  | synonymous    | 0 | 2 |
| CAMKV    | chr3  | 49898393/T//C  | synonymous    | 0 | 2 |
| HYAL3    | chr3  | 50332752/G//A  | synonymous    | 0 | 2 |
| DOCK3    | chr3  | 51264853/G//A  | nonsynonymous | 0 | 2 |
| LRTM1    | chr3  | 54952771/G//A  | synonymous    | 0 | 2 |
| FOXP1    | chr3  | 71064770/G//A  | nonsynonymous | 0 | 2 |
|          | chr3  | 156009817/C//T | synonymous    | 0 | 2 |
| SEL1L3   | chr4  | 25823612/A//C  | synonymous    | 0 | 2 |
| SHROOM3  | chr4  | 77662615/C//T  | nonsynonymous | 0 | 2 |
| GK2      | chr4  | 80327881/G//A  | nonsynonymous | 0 | 2 |
| FHDC1    | chr4  | 153897467/G//T | nonsynonymous | 0 | 2 |
| LMBRD2   | chr5  | 36105221/T//A  | nonsynonymous | 0 | 2 |
| ERBIN    | chr5  | 65321777/A//G  | nonsynonymous | 0 | 2 |
| APC      | chr5  | 112175407/A//C | nonsynonymous | 0 | 2 |
| APC      | chr5  | 112175745/C//T | nonsynonymous | 0 | 2 |
| FBN2     | chr5  | 127614507/C//T | nonsynonymous | 0 | 2 |
| SHROOM1  | chr5  | 132158745/G//A | nonsynonymous | 0 | 2 |
| ARAP3    | chr5  | 141041713/C//T | synonymous    | 0 | 2 |
| CLK4     | chr5  | 178030851/C//T | synonymous    | 0 | 2 |
| NUP153   | chr6  | 17661999/T//G  | nonsynonymous | 0 | 2 |
| TNFAIP3  | chr6  | 138199848/C//T | synonymous    | 0 | 2 |
| GRM1     | chr6  | 146350618/C//T | synonymous    | 0 | 2 |
| NOX3     | chr6  | 155750023/G//A | synonymous    | 0 | 2 |
| HGF      | chr7  | 81355310/C//T  | nonsynonymous | 0 | 2 |

|          |       |                |               |   |   |
|----------|-------|----------------|---------------|---|---|
| ZAN      | chr7  | 100377162/C//T | nonsynonymous | 0 | 2 |
| GRM8     | chr7  | 126882872/C//T | synonymous    | 0 | 2 |
| DENND2A  | chr7  | 140301577/G//A | synonymous    | 0 | 2 |
| CNTNAP2  | chr7  | 146825886/T//G | nonsynonymous | 0 | 2 |
| DLGAP2   | chr8  | 1616675/C//T   | nonsynonymous | 0 | 2 |
| CSMD1    | chr8  | 3205573/C//T   | nonsynonymous | 0 | 2 |
| ASAP1    | chr8  | 131088627/C//G | nonsynonymous | 0 | 2 |
| TG       | chr8  | 134128912/G//A | nonsynonymous | 0 | 2 |
| GAPVD1   | chr9  | 128094307/G//A | nonsynonymous | 0 | 2 |
| PLPP7    | chr9  | 134183544/G//A | nonsynonymous | 0 | 2 |
| PRRC2B   | chr9  | 134358213/C//T | synonymous    | 0 | 2 |
| ARHGAP21 | chr10 | 24874155/C//T  | nonsynonymous | 0 | 2 |
| SVIL     | chr10 | 29788094/C//T  | synonymous    | 0 | 2 |
| MRGPRX1  | chr11 | 18956125/G//A  | synonymous    | 0 | 2 |
| PACSIN3  | chr11 | 47204064/C//T  | nonsynonymous | 0 | 2 |
| SSRP1    | chr11 | 57097812/C//T  | nonsynonymous | 0 | 2 |
| INTS4    | chr11 | 77692580/C//T  | nonsynonymous | 0 | 2 |
| CCDC83   | chr11 | 85576266/G//A  | synonymous    | 0 | 2 |
| FAT3     | chr11 | 92086978/G//A  | nonsynonymous | 0 | 2 |
| BSX      | chr11 | 122848537/G//A | synonymous    | 0 | 2 |
| IGSF9B   | chr11 | 133792490/C//T | nonsynonymous | 0 | 2 |
| AKAP3    | chr12 | 4736349/A//T   | synonymous    | 0 | 2 |
| OLR1     | chr12 | 10319305/C//A  | synonymous    | 0 | 2 |
| ANKRD52  | chr12 | 56641925/G//A  | synonymous    | 0 | 2 |
| SVOP     | chr12 | 109313524/G//A | nonsynonymous | 0 | 2 |
| PABPC3   | chr13 | 25670728/T//C  | nonsynonymous | 0 | 2 |
| ATP8A2   | chr13 | 26273469/G//A  | synonymous    | 0 | 2 |
| BRCA2    | chr13 | 32912807/G//A  | nonsynonymous | 0 | 2 |
| MYCBP2   | chr13 | 77732230/A//G  | synonymous    | 0 | 2 |
| NALCN    | chr13 | 101707798/C//T | nonsynonymous | 0 | 2 |
| CMTM5    | chr14 | 23848689/A//G  | nonsynonymous | 0 | 2 |
| CDC42BPB | chr14 | 103400173/G//A | nonsynonymous | 0 | 2 |
| ATP10A   | chr15 | 25924912/T//G  | nonsynonymous | 0 | 2 |
| SPTBN5   | chr15 | 42143294/G//A  | nonsynonymous | 0 | 2 |
| EPB42    | chr15 | 43498739/G//A  | synonymous    | 0 | 2 |
| CHRN4    | chr15 | 78921761/C//T  | nonsynonymous | 0 | 2 |
| ADAMTS7  | chr15 | 79054874/G//A  | nonsynonymous | 0 | 2 |
| HDDC3    | chr15 | 91475331/C//G  | nonsynonymous | 0 | 2 |
| UNC45A   | chr15 | 91493395/G//T  | synonymous    | 0 | 2 |
| ITGAX    | chr16 | 31382732/G//A  | nonsynonymous | 0 | 2 |
| TSNAXIP1 | chr16 | 67859987/C//A  | synonymous    | 0 | 2 |
| MPO      | chr17 | 56356442/G//A  | nonsynonymous | 0 | 2 |
| MRC2     | chr17 | 60742265/C//T  | nonsynonymous | 0 | 2 |
| CTDP1    | chr18 | 77474948/G//A  | synonymous    | 0 | 2 |
| MOB3A    | chr19 | 2078472/C//T   | nonsynonymous | 0 | 2 |
| DUS3L    | chr19 | 5787133/C//T   | nonsynonymous | 0 | 2 |
| ARMC6    | chr19 | 19166661/G//A  | nonsynonymous | 0 | 2 |
| SHANK1   | chr19 | 51169888/G//A  | nonsynonymous | 0 | 2 |
| CD33     | chr19 | 51738500/C//A  | synonymous    | 0 | 2 |
| MCM8     | chr20 | 5974312/C//T   | nonsynonymous | 0 | 2 |
| SEL1L2   | chr20 | 13912406/G//A  | synonymous    | 0 | 2 |
| MMP24    | chr20 | 33862134/G//A  | nonsynonymous | 0 | 2 |
| DSCAM    | chr21 | 41414371/G//A  | synonymous    | 0 | 2 |
| MYO18B   | chr22 | 26351313/C//A  | synonymous    | 0 | 2 |
| ASPHD2   | chr22 | 26830091/G//A  | synonymous    | 0 | 2 |
| RFPL2    | chr22 | 32586994/C//T  | nonsynonymous | 0 | 2 |
| RBMXL3   | chrX  | 114424866/G//A | nonsynonymous | 0 | 2 |
| FMR1NB   | chrX  | 147063000/G//T | synonymous    | 0 | 2 |
| GPR50    | chrX  | 150348653/C//T | nonsynonymous | 0 | 2 |
| SFN      | chr1  | 27190247/G//A  | nonsynonymous | 0 | 2 |
| PLEKHA6  | chr1  | 204199576/C//T | nonsynonymous | 0 | 2 |
| PSME4    | chr2  | 54197692/C//T  | nonsynonymous | 0 | 2 |
| SFTPB    | chr2  | 85895292/G//A  | synonymous    | 0 | 2 |
| ST6GAL2  | chr2  | 107460028/C//T | nonsynonymous | 0 | 2 |
| AMER3    | chr2  | 131520676/C//A | nonsynonymous | 0 | 2 |
| LRRN1    | chr3  | 3887847/G//A   | nonsynonymous | 0 | 2 |
| SCN11A   | chr3  | 38936379/G//T  | nonsynonymous | 0 | 2 |
| SLC9C1   | chr3  | 111981886/C//T | nonsynonymous | 0 | 2 |
| SOX14    | chr3  | 137484329/G//T | nonsynonymous | 0 | 2 |
| ZMAT3    | chr3  | 178785600/G//T | synonymous    | 0 | 2 |

|             |       |                |               |   |   |
|-------------|-------|----------------|---------------|---|---|
| FXR1        | chr3  | 180685919/G//A | nonsynonymous | 0 | 2 |
| ZNF518B     | chr4  | 10446350/C//T  | nonsynonymous | 0 | 2 |
| SLC34A2     | chr4  | 25671422/T//C  | synonymous    | 0 | 2 |
| FRYL        | chr4  | 48564969/C//T  | synonymous    | 0 | 2 |
| SPATA18     | chr4  | 52917854/G//C  | synonymous    | 0 | 2 |
| MCUB        | chr4  | 110608666/G//T | synonymous    | 0 | 2 |
| ARSJ        | chr4  | 114824634/G//A | nonsynonymous | 0 | 2 |
| CTNND2      | chr5  | 10973744/A//G  | nonsynonymous | 0 | 2 |
| ZNF366      | chr5  | 71756416/T//C  | nonsynonymous | 0 | 2 |
| RASA1       | chr5  | 86672283/T//A  | nonsynonymous | 0 | 2 |
| DND1        | chr5  | 140050879/C//T | synonymous    | 0 | 2 |
| FGF18       | chr5  | 170883614/G//A | synonymous    | 0 | 2 |
| ADAMTS2     | chr5  | 178581070/C//T | synonymous    | 0 | 2 |
| ATXN1       | chr6  | 16327189/C//A  | synonymous    | 0 | 2 |
| HSPA1L      | chr6  | 31778643/C//A  | nonsynonymous | 0 | 2 |
| RIMS1       | chr6  | 72806829/G//T  | synonymous    | 0 | 2 |
| MDN1        | chr6  | 90468573/G//C  | nonsynonymous | 0 | 2 |
| CDHR3       | chr7  | 105644966/C//G | synonymous    | 0 | 2 |
| KIAA1549    | chr7  | 138603515/C//T | nonsynonymous | 0 | 2 |
| PXDNL       | chr8  | 52233403/C//A  | nonsynonymous | 0 | 2 |
| ZFAT        | chr8  | 135490850/C//T | nonsynonymous | 0 | 2 |
| NRBP2       | chr8  | 144918340/A//G | nonsynonymous | 0 | 2 |
| CDC37L1     | chr9  | 4679812/G//T   | synonymous    | 0 | 2 |
| WNK2        | chr9  | 96055116/G//T  | nonsynonymous | 0 | 2 |
| LCNL1       | chr9  | 139877888/T//G | synonymous    | 0 | 2 |
| ITGA8       | chr10 | 15646332/C//G  | nonsynonymous | 0 | 2 |
| OR5B12      | chr11 | 58206724/T//A  | nonsynonymous | 0 | 2 |
| AMOTL1      | chr11 | 94599103/A//G  | synonymous    | 0 | 2 |
| LRRK2       | chr12 | 40653312/G//A  | synonymous    | 0 | 2 |
| PA2G4       | chr12 | 56505284/C//T  | nonsynonymous | 0 | 2 |
| MAP3K9      | chr14 | 71199973/G//A  | nonsynonymous | 0 | 2 |
| TRPM1       | chr15 | 31339375/C//T  | nonsynonymous | 0 | 2 |
| ACAN        | chr15 | 89398415/A//T  | nonsynonymous | 0 | 2 |
| DNAH9       | chr17 | 11835360/G//A  | synonymous    | 0 | 2 |
| CD226       | chr18 | 67614075/G//C  | nonsynonymous | 0 | 2 |
| CBARP       | chr19 | 1236020/C//T   | nonsynonymous | 0 | 2 |
| ZNF709      | chr19 | 12595507/C//A  | synonymous    | 0 | 2 |
| DAND5       | chr19 | 13084480/C//T  | synonymous    | 0 | 2 |
| PDE4C       | chr19 | 18321876/C//G  | nonsynonymous | 0 | 2 |
| SIRPA       | chr20 | 1905506/G//A   | nonsynonymous | 0 | 2 |
| TCF20       | chr22 | 42606234/A//T  | nonsynonymous | 0 | 2 |
| FTHL17      | chrX  | 31089841/C//A  | nonsynonymous | 0 | 2 |
| AFF2        | chrX  | 148062286/G//T | nonsynonymous | 0 | 2 |
| CHD5        | chr1  | 6212524/C//A   | nonsynonymous | 0 | 2 |
| RERE        | chr1  | 8421820/C//A   | synonymous    | 0 | 2 |
| EXOSC10     | chr1  | 11132229/C//A  | nonsynonymous | 0 | 2 |
| VPS13D      | chr1  | 12378286/A//T  | nonsynonymous | 0 | 2 |
| TMEM51      | chr1  | 15541865/C//T  | synonymous    | 0 | 2 |
| AKR7A3      | chr1  | 19612823/C//A  | synonymous    | 0 | 2 |
| HTR1D       | chr1  | 23519623/G//T  | synonymous    | 0 | 2 |
| ASAP3       | chr1  | 23767610/T//C  | nonsynonymous | 0 | 2 |
| SFN         | chr1  | 27190066/G//A  | synonymous    | 0 | 2 |
| ADGRB2      | chr1  | 32209896/G//C  | nonsynonymous | 0 | 2 |
| ZMYM4       | chr1  | 35864526/G//A  | nonsynonymous | 0 | 2 |
| KANK4       | chr1  | 62739327/G//T  | synonymous    | 0 | 2 |
|             | chr1  | 67394582/A//C  | synonymous    | 0 | 2 |
| FPGT-TNNI3K | chr1  | 74954908/A//T  | nonsynonymous | 0 | 2 |
| ERICH3      | chr1  | 75037615/C//A  | nonsynonymous | 0 | 2 |
| LHX8        | chr1  | 75614269/C//A  | synonymous    | 0 | 2 |
| MSH4        | chr1  | 76262831/C//G  | nonsynonymous | 0 | 2 |
| ADGRL4      | chr1  | 79356884/G//T  | nonsynonymous | 0 | 2 |
| GBP7        | chr1  | 89607329/T//A  | synonymous    | 0 | 2 |
| TGFBR3      | chr1  | 92327097/C//G  | synonymous    | 0 | 2 |
| SLC30A7     | chr1  | 101361838/A//C | nonsynonymous | 0 | 2 |
| MAB21L3     | chr1  | 116666872/G//T | nonsynonymous | 0 | 2 |
| TTF2        | chr1  | 117618069/G//T | nonsynonymous | 0 | 2 |
| HDGF        | chr1  | 156714083/C//A | nonsynonymous | 0 | 2 |
| CD1E        | chr1  | 158325808/C//A | nonsynonymous | 0 | 2 |
| OR6Y1       | chr1  | 158517761/C//A | synonymous    | 0 | 2 |
| SPTA1       | chr1  | 158612691/G//T | nonsynonymous | 0 | 2 |

|           |      |                |               |   |   |
|-----------|------|----------------|---------------|---|---|
| SPTA1     | chr1 | 158648246/C//A | nonsynonymous | 0 | 2 |
| FASLG     | chr1 | 172635001/A//T | nonsynonymous | 0 | 2 |
| TNN       | chr1 | 175086182/A//T | nonsynonymous | 0 | 2 |
| RFWD2     | chr1 | 175957433/T//C | nonsynonymous | 0 | 2 |
| ASTN1     | chr1 | 176926953/A//T | nonsynonymous | 0 | 2 |
| BRINP2    | chr1 | 177250008/G//T | nonsynonymous | 0 | 2 |
| SEC16B    | chr1 | 177902353/G//C | nonsynonymous | 0 | 2 |
| CACNA1E   | chr1 | 181686338/C//T | synonymous    | 0 | 2 |
| KCNT2     | chr1 | 196448370/T//A | nonsynonymous | 0 | 2 |
| NEK7      | chr1 | 198247197/G//C | nonsynonymous | 0 | 2 |
| IGFN1     | chr1 | 201175838/G//A | nonsynonymous | 0 | 2 |
| ARL8A     | chr1 | 202107134/G//A | synonymous    | 0 | 2 |
| LGR6      | chr1 | 202273732/C//A | nonsynonymous | 0 | 2 |
| LAX1      | chr1 | 203734577/G//A | synonymous    | 0 | 2 |
| IRF6      | chr1 | 209974709/T//A | nonsynonymous | 0 | 2 |
| PROX1     | chr1 | 214170032/C//G | nonsynonymous | 0 | 2 |
| CENPF     | chr1 | 214830446/G//T | nonsynonymous | 0 | 2 |
| USH2A     | chr1 | 215960185/G//T | nonsynonymous | 0 | 2 |
| HIST3H2BB | chr1 | 228645823/C//G | synonymous    | 0 | 2 |
| CHRM3     | chr1 | 240072512/G//A | synonymous    | 0 | 2 |
| FMN2      | chr1 | 240286487/C//A | nonsynonymous | 0 | 2 |
| PLD5      | chr1 | 242263997/T//C | nonsynonymous | 0 | 2 |
| C1orf101  | chr1 | 244747231/T//C | nonsynonymous | 0 | 2 |
| SMYD3     | chr1 | 245927427/G//A | synonymous    | 0 | 2 |
| OR2M7     | chr1 | 248487220/G//T | synonymous    | 0 | 2 |
| OR2T4     | chr1 | 248525769/C//A | nonsynonymous | 0 | 2 |
| OR2T1     | chr1 | 248570384/G//T | nonsynonymous | 0 | 2 |
| SLC30A3   | chr2 | 27485845/G//C  | synonymous    | 0 | 2 |
|           | chr2 | 27851313/G//A  | synonymous    | 0 | 2 |
| GPN1      | chr2 | 27858005/A//C  | nonsynonymous | 0 | 2 |
| HEATR5B   | chr2 | 37284496/C//G  | nonsynonymous | 0 | 2 |
| NRXN1     | chr2 | 50463927/T//A  | synonymous    | 0 | 2 |
| CCDC88A   | chr2 | 55523569/C//T  | nonsynonymous | 0 | 2 |
| EXOC6B    | chr2 | 72411226/T//C  | nonsynonymous | 0 | 2 |
| LRRTM1    | chr2 | 80529396/C//A  | nonsynonymous | 0 | 2 |
| LRRTM1    | chr2 | 80530742/A//G  | nonsynonymous | 0 | 2 |
| MRPL35    | chr2 | 86437838/G//T  | synonymous    | 0 | 2 |
| SMYD1     | chr2 | 88387486/G//T  | synonymous    | 0 | 2 |
| TEX37     | chr2 | 88828810/G//C  | nonsynonymous | 0 | 2 |
| SNRNP200  | chr2 | 96949050/C//A  | nonsynonymous | 0 | 2 |
| VWA3B     | chr2 | 98866845/C//G  | nonsynonymous | 0 | 2 |
| ZC3H6     | chr2 | 113088767/C//T | nonsynonymous | 0 | 2 |
| ACTR3     | chr2 | 114691893/A//G | nonsynonymous | 0 | 2 |
| GPR148    | chr2 | 131486845/G//C | nonsynonymous | 0 | 2 |
| TMEM163   | chr2 | 135309638/G//T | nonsynonymous | 0 | 2 |
| LCT       | chr2 | 136575266/T//A | nonsynonymous | 0 | 2 |
| LCT       | chr2 | 136581525/C//A | nonsynonymous | 0 | 2 |
| SCN3A     | chr2 | 165948805/C//G | nonsynonymous | 0 | 2 |
| SCN9A     | chr2 | 167149789/G//T | synonymous    | 0 | 2 |
| XIRP2     | chr2 | 168107311/A//G | nonsynonymous | 0 | 2 |
| LRP2      | chr2 | 170129550/C//A | nonsynonymous | 0 | 2 |
| TTN       | chr2 | 179463475/C//T | nonsynonymous | 0 | 2 |
| TTN       | chr2 | 179485026/C//A | nonsynonymous | 0 | 2 |
| TTN       | chr2 | 179547565/G//A | nonsynonymous | 0 | 2 |
| TTN       | chr2 | 179550271/T//A | nonsynonymous | 0 | 2 |
| TTN       | chr2 | 179596128/G//T | nonsynonymous | 0 | 2 |
| SLC40A1   | chr2 | 190428466/C//A | nonsynonymous | 0 | 2 |
| MYO1B     | chr2 | 192206295/G//C | synonymous    | 0 | 2 |
| HECW2     | chr2 | 197183391/C//A | synonymous    | 0 | 2 |
| PARD3B    | chr2 | 206480263/G//T | nonsynonymous | 0 | 2 |
| PIKFYVE   | chr2 | 209190574/A//T | nonsynonymous | 0 | 2 |
| MYL1      | chr2 | 211158451/G//C | nonsynonymous | 0 | 2 |
| CPS1      | chr2 | 211540525/C//A | nonsynonymous | 0 | 2 |
| ABCA12    | chr2 | 215840523/C//A | nonsynonymous | 0 | 2 |
| CFAP65    | chr2 | 219888009/C//A | nonsynonymous | 0 | 2 |
| COL4A4    | chr2 | 227985872/G//A | synonymous    | 0 | 2 |
| GPR55     | chr2 | 231775621/C//A | nonsynonymous | 0 | 2 |
| BTD       | chr3 | 15686612/G//T  | nonsynonymous | 0 | 2 |
| STAC      | chr3 | 36570420/T//G  | nonsynonymous | 0 | 2 |
| XYLB      | chr3 | 38437001/A//T  | nonsynonymous | 0 | 2 |

|          |      |                          |               |   |   |
|----------|------|--------------------------|---------------|---|---|
| SCN11A   | chr3 | 38951602/C//A            | nonsynonymous | 0 | 2 |
| ZNF662   | chr3 | 42955820/G//T            | nonsynonymous | 0 | 2 |
| SLC6A20  | chr3 | 45817309/G//C            | nonsynonymous | 0 | 2 |
| CELSR3   | chr3 | 48699319/C//T            | nonsynonymous | 0 | 2 |
| USP19    | chr3 | 49148217/G//A            | nonsynonymous | 0 | 2 |
| POC1A    | chr3 | 52183383/G//A            | nonsynonymous | 0 | 2 |
| ZNF717   | chr3 | 75787885/C//G            | nonsynonymous | 0 | 2 |
| HTR1F    | chr3 | 88040450/A//T            | nonsynonymous | 0 | 2 |
| GOLGB1   | chr3 | 121414823/C//G           | nonsynonymous | 0 | 2 |
| PRR23A   | chr3 | 138724764/T//C           | nonsynonymous | 0 | 2 |
| ZNF518B  | chr4 | 10445561/C//G            | nonsynonymous | 0 | 2 |
| CLRN2    | chr4 | 17516844/C//G            | synonymous    | 0 | 2 |
| SLIT2    | chr4 | 20591307/C//A            | nonsynonymous | 0 | 2 |
| YIPF7    | chr4 | 44624484/C//G            | nonsynonymous | 0 | 2 |
| IGFBP7   | chr4 | 57976223/C//A            | nonsynonymous | 0 | 2 |
| SCARB2   | chr4 | 77097682/C//T            | nonsynonymous | 0 | 2 |
| RAP1GDS1 | chr4 | 99339905/T//A            | nonsynonymous | 0 | 2 |
| UCP1     | chr4 | 141484332/A//G           | nonsynonymous | 0 | 2 |
| FSTL5    | chr4 | 162841607/G//A           | synonymous    | 0 | 2 |
| AADAT    | chr4 | 170990300/C//A           | nonsynonymous | 0 | 2 |
| SNX25    | chr4 | 186263193/G//A           | nonsynonymous | 0 | 2 |
| MTNR1A   | chr4 | 187455092/C//T           | nonsynonymous | 0 | 2 |
| ICE1     | chr5 | 5464912/C//G             | nonsynonymous | 0 | 2 |
| DNAH5    | chr5 | 13820544/G//A            | nonsynonymous | 0 | 2 |
| DNAH5    | chr5 | 13901681/A//G            | synonymous    | 0 | 2 |
| RAI14    | chr5 | 34823757/G//A            | nonsynonymous | 0 | 2 |
| EGFLAM   | chr5 | 38418259/G//A            | nonsynonymous | 0 | 2 |
| MROH2B   | chr5 | 41008715/G//T            | nonsynonymous | 0 | 2 |
| FNIP1    | chr5 | 131007720/C//A           | nonsynonymous | 0 | 2 |
| PCDHA2   | chr5 | 140176423/G//T           | nonsynonymous | 0 | 2 |
| PCDHA4   | chr5 | 140187486/T//A           | nonsynonymous | 0 | 2 |
| PCDHA5   | chr5 | 140201827/C//A           | nonsynonymous | 0 | 2 |
| PCDHA12  | chr5 | 140255577/C//A           | nonsynonymous | 0 | 2 |
| ABLIM3   | chr5 | 148577960/G//C           | nonsynonymous | 0 | 2 |
| CSF1R    | chr5 | 149440436/C//A           | nonsynonymous | 0 | 2 |
| FAT2     | chr5 | 150922572/C//A           | nonsynonymous | 0 | 2 |
| HAVCR1   | chr5 | 156464346/C//G           | synonymous    | 0 | 2 |
| DOCK2    | chr5 | 169101423/C//A           | synonymous    | 0 | 2 |
| HRH2     | chr5 | 175110521/C//A           | synonymous    | 0 | 2 |
| RAB24    | chr5 | 176729444/C//A           | synonymous    | 0 | 2 |
| SLC22A23 | chr6 | 3456218/C//T             | synonymous    | 0 | 2 |
| HIST1H4C | chr6 | 26104268/A//G            | synonymous    | 0 | 2 |
| UHRF1BP1 | chr6 | 34825965/C//T            | nonsynonymous | 0 | 2 |
| TDRD6    | chr6 | 46657805/A//G            | nonsynonymous | 0 | 2 |
| ADGRF5   | chr6 | 46827007/C//A            | nonsynonymous | 0 | 2 |
| PKHD1    | chr6 | 51768810/C//A            | nonsynonymous | 0 | 2 |
| EYS      | chr6 | 66204829/A//C            | nonsynonymous | 0 | 2 |
| SNAP91   | chr6 | 84269927/G//T            | nonsynonymous | 0 | 2 |
| HTR1E    | chr6 | 87725628/T//A            | nonsynonymous | 0 | 2 |
| GRIK2    | chr6 | 102130487/T//C           | synonymous    | 0 | 2 |
| AIM1     | chr6 | 106999768/A//G           | nonsynonymous | 0 | 2 |
| EPM2A    | chr6 | 145948833/C//A           | synonymous    | 0 | 2 |
| STXBP5   | chr6 | 147680334/C//T           | nonsynonymous | 0 | 2 |
| LATS1    | chr6 | 150004316/G//C           | nonsynonymous | 0 | 2 |
| TNRC18   | chr7 | 5353058/C//A             | synonymous    | 0 | 2 |
| CREB5    | chr7 | 28610048/C//A            | nonsynonymous | 0 | 2 |
| NPC1L1   | chr7 | 44579349/A//T            | nonsynonymous | 0 | 2 |
| ZNF107   | chr7 | 64168438/G//T            | nonsynonymous | 0 | 2 |
| ANKIB1   | chr7 | 91991584/G//C            | nonsynonymous | 0 | 2 |
| ZAN      | chr7 | 100366281/A//T           | nonsynonymous | 0 | 2 |
| GPR22    | chr7 | 107115491/T//A           | nonsynonymous | 0 | 2 |
| KCND2    | chr7 | 119915005/C//T           | nonsynonymous | 0 | 2 |
| GRM8     | chr7 | 126173756/C//A           | nonsynonymous | 0 | 2 |
| WEE2     | chr7 | 141418917/G//C           | nonsynonymous | 0 | 2 |
| OR9A2    | chr7 | 142723347/G//T           | nonsynonymous | 0 | 2 |
| OR2A2    | chr7 | 143807107/T//A           | synonymous    | 0 | 2 |
| CUL1     | chr7 | 148457524/G//C           | nonsynonymous | 0 | 2 |
| SLC4A2   | chr7 | 150767104/C//T           | synonymous    | 0 | 2 |
| SLC4A2   | chr7 | 150767107/CTCTGACCAGA//C | nonsynonymous | 0 | 2 |
| CSMD1    | chr8 | 2820776/C//A             | nonsynonymous | 0 | 2 |

|           |       |                 |               |   |   |
|-----------|-------|-----------------|---------------|---|---|
|           | chr8  | 18666343/C//A   | synonymous    | 0 | 2 |
| FNTA      | chr8  | 42939847/T//C   | synonymous    | 0 | 2 |
| PRKDC     | chr8  | 48701591/C//G   | nonsynonymous | 0 | 2 |
| CLVS1     | chr8  | 62212743/G//T   | nonsynonymous | 0 | 2 |
| SLCO5A1   | chr8  | 70744153/C//T   | synonymous    | 0 | 2 |
| ZFH4      | chr8  | 77763273/C//A   | nonsynonymous | 0 | 2 |
| LRRCC1    | chr8  | 86025171/G//C   | nonsynonymous | 0 | 2 |
| CNGB3     | chr8  | 87591331/T//A   | synonymous    | 0 | 2 |
| PKHD1L1   | chr8  | 110425663/A//G  | nonsynonymous | 0 | 2 |
|           | chr8  | 114389032/G//C  | synonymous    | 0 | 2 |
| SAMD12    | chr8  | 119593092/A//G  | synonymous    | 0 | 2 |
| DEPTOR    | chr8  | 120977579/G//T  | nonsynonymous | 0 | 2 |
| ZFAT-AS1  | chr8  | 135612565/C//G  | synonymous    | 0 | 2 |
| ZFAT-AS1  | chr8  | 135612630/C//T  | synonymous    | 0 | 2 |
| ZFAT      | chr8  | 135612747/C//T  | nonsynonymous | 0 | 2 |
| ZFAT      | chr8  | 135613729/C//G  | nonsynonymous | 0 | 2 |
| ZFAT      | chr8  | 135613760/C//T  | synonymous    | 0 | 2 |
| ZFAT      | chr8  | 135614179/C//G  | nonsynonymous | 0 | 2 |
| FAM135B   | chr8  | 139380161/G//C  | synonymous    | 0 | 2 |
| MROH5     | chr8  | 142505489/G//T  | synonymous    | 0 | 2 |
| LYPD2     | chr8  | 143833806/C//G  | synonymous    | 0 | 2 |
| ZC3H3     | chr8  | 144620978/C//A  | nonsynonymous | 0 | 2 |
| CCDC166   | chr8  | 144789088/C//T  | nonsynonymous | 0 | 2 |
| TONSL     | chr8  | 145667801/G//C  | synonymous    | 0 | 2 |
| RFX3      | chr9  | 3288257/T//C    | synonymous    | 0 | 2 |
| RRAGA     | chr9  | 19049986/T//A   | nonsynonymous | 0 | 2 |
|           | chr9  | 36276922/A//T   | synonymous    | 0 | 2 |
| TMEM252   | chr9  | 71152335/G//C   | nonsynonymous | 0 | 2 |
| VPS13A    | chr9  | 79936407/G//T   | nonsynonymous | 0 | 2 |
| SPATA31C2 | chr9  | 90747621/G//A   | synonymous    | 0 | 2 |
| WNK2      | chr9  | 96021465/A//T   | nonsynonymous | 0 | 2 |
| SVEP1     | chr9  | 113252047/C//A  | nonsynonymous | 0 | 2 |
| RGS3      | chr9  | 116276820/G//A  | synonymous    | 0 | 2 |
| OR1Q1     | chr9  | 125377472/C//G  | synonymous    | 0 | 2 |
| OR1B1     | chr9  | 125391222/A//G  | nonsynonymous | 0 | 2 |
| LCN9      | chr9  | 138557700/C//A  | synonymous    | 0 | 2 |
| NOTCH1    | chr9  | 139409060/GC//G | nonsynonymous | 0 | 2 |
| CACNB2    | chr10 | 18789761/G//T   | nonsynonymous | 0 | 2 |
| SKIDA1    | chr10 | 21805270/G//A   | synonymous    | 0 | 2 |
| ZEB1      | chr10 | 31815730/C//T   | synonymous    | 0 | 2 |
| A1CF      | chr10 | 52595889/G//C   | nonsynonymous | 0 | 2 |
| DUSP13    | chr10 | 76861669/G//T   | synonymous    | 0 | 2 |
| RBM20     | chr10 | 112572225/G//T  | synonymous    | 0 | 2 |
| GPAM      | chr10 | 113931957/G//A  | synonymous    | 0 | 2 |
| DMBT1     | chr10 | 124395581/G//A  | nonsynonymous | 0 | 2 |
| CUZD1     | chr10 | 124596394/C//A  | nonsynonymous | 0 | 2 |
| MKI67     | chr10 | 129899585/C//A  | nonsynonymous | 0 | 2 |
| KNDC1     | chr10 | 134997384/C//A  | synonymous    | 0 | 2 |
| MUC5B     | chr11 | 1278761/C//A    | nonsynonymous | 0 | 2 |
| OR51S1    | chr11 | 4870247/G//A    | synonymous    | 0 | 2 |
| OR51L1    | chr11 | 5020447/A//G    | nonsynonymous | 0 | 2 |
| OR51V1    | chr11 | 5221004/A//G    | synonymous    | 0 | 2 |
| OR51B2    | chr11 | 5345261/C//A    | nonsynonymous | 0 | 2 |
| DCHS1     | chr11 | 6661662/C//T    | nonsynonymous | 0 | 2 |
| RBMXL2    | chr11 | 7111247/C//T    | nonsynonymous | 0 | 2 |
| C11orf58  | chr11 | 16760356/G//T   | nonsynonymous | 0 | 2 |
| SLC6A5    | chr11 | 20628563/C//G   | synonymous    | 0 | 2 |
| ANO5      | chr11 | 22232858/A//G   | nonsynonymous | 0 | 2 |
| HIPK3     | chr11 | 33308441/C//A   | nonsynonymous | 0 | 2 |
| OR4C3     | chr11 | 48347219/T//C   | nonsynonymous | 0 | 2 |
| TRIM49B   | chr11 | 49059135/C//A   | nonsynonymous | 0 | 2 |
| TRIM64C   | chr11 | 49080622/A//G   | nonsynonymous | 0 | 2 |
| OR5D18    | chr11 | 55587141/G//T   | synonymous    | 0 | 2 |
| OR8K5     | chr11 | 55927379/G//T   | synonymous    | 0 | 2 |
| OR8K5     | chr11 | 55927549/A//T   | nonsynonymous | 0 | 2 |
| OR5R1     | chr11 | 56185472/C//A   | synonymous    | 0 | 2 |
| OR5M9     | chr11 | 56230581/G//T   | nonsynonymous | 0 | 2 |
| OR10V1    | chr11 | 59481189/T//C   | nonsynonymous | 0 | 2 |
| TCN1      | chr11 | 59620441/G//C   | synonymous    | 0 | 2 |
| FADS1     | chr11 | 61578349/C//A   | synonymous    | 0 | 2 |



|             |       |                |               |   |   |
|-------------|-------|----------------|---------------|---|---|
| SLC22A6     | chr11 | 62749411/G//A  | nonsynonymous | 0 | 2 |
| PLA2G16     | chr11 | 63357680/G//T  | synonymous    | 0 | 2 |
| TRPT1       | chr11 | 63993025/G//A  | synonymous    | 0 | 2 |
| CDC42BPG    | chr11 | 64601973/G//A  | nonsynonymous | 0 | 2 |
| ATG2A       | chr11 | 64675238/T//C  | nonsynonymous | 0 | 2 |
| RNASEH2C    | chr11 | 65486798/C//A  | synonymous    | 0 | 2 |
| CTSF        | chr11 | 66332107/C//A  | nonsynonymous | 0 | 2 |
| FAT3        | chr11 | 92533247/A//T  | nonsynonymous | 0 | 2 |
| SLC36A4     | chr11 | 92917632/T//A  | nonsynonymous | 0 | 2 |
| CEP295      | chr11 | 93416837/G//T  | nonsynonymous | 0 | 2 |
| ATM         | chr11 | 108213947/A//C | nonsynonymous | 0 | 2 |
| NLRX1       | chr11 | 119045506/T//C | synonymous    | 0 | 2 |
| GRIK4       | chr11 | 120690570/C//A | nonsynonymous | 0 | 2 |
| GRIK4       | chr11 | 120852871/G//A | nonsynonymous | 0 | 2 |
| NTM         | chr11 | 132177612/T//C | synonymous    | 0 | 2 |
| OPCML       | chr11 | 132307246/C//A | nonsynonymous | 0 | 2 |
| REGG        | chr12 | 15261942/C//A  | synonymous    | 0 | 2 |
| COL2A1      | chr12 | 48383568/A//G  | synonymous    | 0 | 2 |
| KRT79       | chr12 | 53216153/C//A  | nonsynonymous | 0 | 2 |
| OR6C75      | chr12 | 55759253/G//T  | nonsynonymous | 0 | 2 |
| HELB        | chr12 | 66718866/G//T  | nonsynonymous | 0 | 2 |
| OTOGL       | chr12 | 80651698/T//G  | nonsynonymous | 0 | 2 |
| PTPRQ       | chr12 | 81043451/A//G  | synonymous    | 0 | 2 |
| EPYC        | chr12 | 91396267/T//C  | nonsynonymous | 0 | 2 |
| FAM71C      | chr12 | 100042387/C//G | synonymous    | 0 | 2 |
| NAA25       | chr12 | 112509722/C//A | nonsynonymous | 0 | 2 |
| HECTD4      | chr12 | 112746659/T//A | synonymous    | 0 | 2 |
| SETD1B      | chr12 | 122265953/C//T | nonsynonymous | 0 | 2 |
| HIP1R       | chr12 | 123340864/C//A | synonymous    | 0 | 2 |
| TMEM132D    | chr12 | 130184653/C//A | nonsynonymous | 0 | 2 |
| TMEM132D    | chr12 | 130184823/C//A | nonsynonymous | 0 | 2 |
| PIWIL1      | chr12 | 130833898/G//C | nonsynonymous | 0 | 2 |
| NBEA        | chr13 | 35730265/G//T  | nonsynonymous | 0 | 2 |
| SOHLH2      | chr13 | 36748947/C//A  | nonsynonymous | 0 | 2 |
| AKAP11      | chr13 | 42876025/A//G  | nonsynonymous | 0 | 2 |
| ERICH6B     | chr13 | 46124139/T//A  | nonsynonymous | 0 | 2 |
| ATP7B       | chr13 | 52548606/C//A  | synonymous    | 0 | 2 |
| PCDH17      | chr13 | 58298856/C//A  | nonsynonymous | 0 | 2 |
| CCDC168     | chr13 | 103410788/A//C | nonsynonymous | 0 | 2 |
| OR11H6      | chr14 | 20692168/A//C  | synonymous    | 0 | 2 |
| LRFN5       | chr14 | 42356155/C//A  | nonsynonymous | 0 | 2 |
| MDGA2       | chr14 | 47343334/T//A  | nonsynonymous | 0 | 2 |
| CGRRF1      | chr14 | 55004525/A//T  | nonsynonymous | 0 | 2 |
| C14orf37    | chr14 | 58605202/C//A  | nonsynonymous | 0 | 2 |
| KIAA0586    | chr14 | 58909512/A//T  | nonsynonymous | 0 | 2 |
| RHOJ        | chr14 | 63757666/C//T  | nonsynonymous | 0 | 2 |
| CHURC1-FNTB | chr14 | 65521353/C//A  | nonsynonymous | 0 | 2 |
| GALNT16     | chr14 | 69791433/G//A  | synonymous    | 0 | 2 |
| PROX2       | chr14 | 75325138/A//T  | nonsynonymous | 0 | 2 |
| RPS6KA5     | chr14 | 91526874/G//A  | synonymous    | 0 | 2 |
| CCDC88C     | chr14 | 91739252/G//T  | nonsynonymous | 0 | 2 |
| SETD3       | chr14 | 99872906/C//T  | nonsynonymous | 0 | 2 |
| NIPA1       | chr15 | 23049107/C//A  | nonsynonymous | 0 | 2 |
| GABRB3      | chr15 | 26825601/C//A  | nonsynonymous | 0 | 2 |
| KATNBL1     | chr15 | 34437613/C//A  | nonsynonymous | 0 | 2 |
| TP53BP1     | chr15 | 43766960/G//A  | nonsynonymous | 0 | 2 |
| WDR72       | chr15 | 54003101/T//C  | nonsynonymous | 0 | 2 |
| ADAM10      | chr15 | 58974515/T//C  | nonsynonymous | 0 | 2 |
| NEO1        | chr15 | 73570499/G//T  | nonsynonymous | 0 | 2 |
| CHRNA3      | chr15 | 78909398/C//A  | nonsynonymous | 0 | 2 |
| MEX3B       | chr15 | 82335938/C//G  | nonsynonymous | 0 | 2 |
| NTRK3       | chr15 | 88678509/G//T  | synonymous    | 0 | 2 |
| LRRC28      | chr15 | 99926345/C//T  | synonymous    | 0 | 2 |
| ADAMTS17    | chr15 | 100657103/C//A | nonsynonymous | 0 | 2 |
| WDR24       | chr16 | 735508/C//A    | nonsynonymous | 0 | 2 |
| ZNF598      | chr16 | 2051608/C//T   | nonsynonymous | 0 | 2 |
| PKD1        | chr16 | 2161136/C//T   | synonymous    | 0 | 2 |
| BICDL2      | chr16 | 3078086/G//T   | synonymous    | 0 | 2 |
| UBALD1      | chr16 | 4664821/C//A   | synonymous    | 0 | 2 |
| ERCC4       | chr16 | 14029212/A//G  | nonsynonymous | 0 | 2 |

|          |       |               |               |   |   |
|----------|-------|---------------|---------------|---|---|
| ZNF843   | chr16 | 31447015/A//T | synonymous    | 0 | 2 |
|          | chr16 | 31476600/G//T | synonymous    | 0 | 2 |
| FTO      | chr16 | 53859862/C//T | synonymous    | 0 | 2 |
| VAC14    | chr16 | 70726804/C//A | nonsynonymous | 0 | 2 |
| IST1     | chr16 | 71950412/G//A | nonsynonymous | 0 | 2 |
| PSMD7    | chr16 | 74339224/C//T | nonsynonymous | 0 | 2 |
| KLHDC4   | chr16 | 87744948/C//A | nonsynonymous | 0 | 2 |
| ZFPM1    | chr16 | 88555480/G//T | nonsynonymous | 0 | 2 |
| MYBBP1A  | chr17 | 4451951/A//T  | synonymous    | 0 | 2 |
| NLRP1    | chr17 | 5487007/C//T  | nonsynonymous | 0 | 2 |
| WSCD1    | chr17 | 5993699/C//G  | nonsynonymous | 0 | 2 |
| TP53     | chr17 | 7578469/C//A  | nonsynonymous | 0 | 2 |
| MYH4     | chr17 | 10356576/C//A | nonsynonymous | 0 | 2 |
| MYH2     | chr17 | 10447429/G//T | nonsynonymous | 0 | 2 |
| DNAH9    | chr17 | 11833256/C//G | nonsynonymous | 0 | 2 |
| FBWX10   | chr17 | 18671949/G//T | nonsynonymous | 0 | 2 |
| ULK2     | chr17 | 19728500/G//A | synonymous    | 0 | 2 |
| KIAA0100 | chr17 | 26947641/C//A | synonymous    | 0 | 2 |
| TOP2A    | chr17 | 38546373/G//A | synonymous    | 0 | 2 |
| GHDC     | chr17 | 40341850/C//A | synonymous    | 0 | 2 |
| SLC25A39 | chr17 | 42397446/C//A | nonsynonymous | 0 | 2 |
|          | chr17 | 49123901/C//T | synonymous    | 0 | 2 |
| CA10     | chr17 | 49710994/C//A | synonymous    | 0 | 2 |
| MRPS23   | chr17 | 55917211/T//A | nonsynonymous | 0 | 2 |
| ABCA10   | chr17 | 67218716/C//A | nonsynonymous | 0 | 2 |
| TBC1D16  | chr17 | 77984543/C//A | nonsynonymous | 0 | 2 |
| L3MBTL4  | chr18 | 5956236/G//A  | nonsynonymous | 0 | 2 |
| PTPRM    | chr18 | 7906549/T//G  | nonsynonymous | 0 | 2 |
| ASXL3    | chr18 | 31187580/C//G | nonsynonymous | 0 | 2 |
| HNRNPM   | chr19 | 8551017/G//T  | nonsynonymous | 0 | 2 |
| MUC16    | chr19 | 9070314/T//C  | nonsynonymous | 0 | 2 |
| ECSIT    | chr19 | 11616997/G//C | synonymous    | 0 | 2 |
| PDE4C    | chr19 | 18332115/G//T | synonymous    | 0 | 2 |
| ANKRD27  | chr19 | 33098684/C//A | nonsynonymous | 0 | 2 |
| ZNF573   | chr19 | 38229596/G//C | nonsynonymous | 0 | 2 |
| MEGF8    | chr19 | 42838302/G//C | synonymous    | 0 | 2 |
| NANOS2   | chr19 | 46417556/G//T | synonymous    | 0 | 2 |
| CCDC8    | chr19 | 46915654/C//T | synonymous    | 0 | 2 |
| KCNJ14   | chr19 | 48965568/A//T | nonsynonymous | 0 | 2 |
| SPHK2    | chr19 | 49131436/A//T | synonymous    | 0 | 2 |
| POLD1    | chr19 | 50905326/G//C | synonymous    | 0 | 2 |
| SIGLEC14 | chr19 | 52148732/G//T | nonsynonymous | 0 | 2 |
| ZNF613   | chr19 | 52448027/C//T | synonymous    | 0 | 2 |
| PRKCG    | chr19 | 54387498/G//A | nonsynonymous | 0 | 2 |
| NDUFA3   | chr19 | 54606163/G//T | synonymous    | 0 | 2 |
| KIR3DL1  | chr19 | 55341789/C//T | synonymous    | 0 | 2 |
| HSPBP1   | chr19 | 55789060/C//G | nonsynonymous | 0 | 2 |
| NLRP8    | chr19 | 56466869/C//A | nonsynonymous | 0 | 2 |
| ZSCAN5A  | chr19 | 56735187/T//A | nonsynonymous | 0 | 2 |
| PEG3     | chr19 | 57328051/C//A | nonsynonymous | 0 | 2 |
| ZIM2     | chr19 | 57334187/G//A | nonsynonymous | 0 | 2 |
| GPCPD1   | chr20 | 5559080/G//T  | nonsynonymous | 0 | 2 |
| ACSS1    | chr20 | 25038556/C//G | synonymous    | 0 | 2 |
| ZNF337   | chr20 | 25657150/G//A | synonymous    | 0 | 2 |
|          | chr20 | 35421837/C//A | synonymous    | 0 | 2 |
| TTI1     | chr20 | 36641100/G//T | synonymous    | 0 | 2 |
| CHD6     | chr20 | 40076561/C//G | nonsynonymous | 0 | 2 |
| PTPRT    | chr20 | 40710572/G//A | nonsynonymous | 0 | 2 |
| ZSWIM1   | chr20 | 44511699/C//G | nonsynonymous | 0 | 2 |
| ARFGEF2  | chr20 | 47585711/G//T | nonsynonymous | 0 | 2 |
| CABLES2  | chr20 | 60971418/C//A | nonsynonymous | 0 | 2 |
| KCNQ2    | chr20 | 62076018/G//A | synonymous    | 0 | 2 |
| HELZ2    | chr20 | 62195052/T//A | nonsynonymous | 0 | 2 |
| TPTE     | chr21 | 10944742/G//T | synonymous    | 0 | 2 |
| SAMSN1   | chr21 | 15882666/G//C | nonsynonymous | 0 | 2 |
| C21orf91 | chr21 | 19165676/T//C | synonymous    | 0 | 2 |
| DSCAM    | chr21 | 42080507/G//A | synonymous    | 0 | 2 |
| TMPRSS3  | chr21 | 43792845/C//G | synonymous    | 0 | 2 |
| AIRE     | chr21 | 45711025/C//G | nonsynonymous | 0 | 2 |
| CCDC116  | chr22 | 21987450/G//T | synonymous    | 0 | 2 |

|          |       |                  |               |   |   |
|----------|-------|------------------|---------------|---|---|
| SEZ6L    | chr22 | 26761338/C//A    | nonsynonymous | 0 | 2 |
| FOXRED2  | chr22 | 36892089/C//A    | nonsynonymous | 0 | 2 |
| MGAT3    | chr22 | 39883425/T//G    | nonsynonymous | 0 | 2 |
| EFCAB6   | chr22 | 43924828/A//G    | nonsynonymous | 0 | 2 |
| TAB3     | chrX  | 30870917/C//A    | nonsynonymous | 0 | 2 |
| FAM47B   | chrX  | 34962178/C//G    | synonymous    | 0 | 2 |
| KDM6A    | chrX  | 44945108/A//T    | nonsynonymous | 0 | 2 |
| CACNA1F  | chrX  | 49072873/A//C    | nonsynonymous | 0 | 2 |
| GSPT2    | chrX  | 51488437/G//T    | nonsynonymous | 0 | 2 |
| RRAGB    | chrX  | 55757982/A//G    | nonsynonymous | 0 | 2 |
| CHM      | chrX  | 85302540/G//A    | synonymous    | 0 | 2 |
| PCDH11X  | chrX  | 91090714/G//C    | nonsynonymous | 0 | 2 |
| SAGE1    | chrX  | 134992313/G//A   | nonsynonymous | 0 | 2 |
| SPANXD   | chrX  | 140785632/G//T   | nonsynonymous | 0 | 2 |
| FLNA     | chrX  | 153593044/G//A   | synonymous    | 0 | 2 |
| F8       | chrX  | 154088827/T//A   | synonymous    | 0 | 2 |
| PRDM16   | chr1  | 3347458/G//A     | nonsynonymous | 0 | 2 |
| CASP9    | chr1  | 15831193/C//T    | nonsynonymous | 0 | 2 |
| MYOM3    | chr1  | 24419473/C//T    | nonsynonymous | 0 | 2 |
| HFM1     | chr1  | 91733357/A//T    | nonsynonymous | 0 | 2 |
| CREG1    | chr1  | 167511467/G//A   | synonymous    | 0 | 2 |
| MAP3K21  | chr1  | 233482322/G//A   | nonsynonymous | 0 | 2 |
| HOXD12   | chr2  | 176965257/G//A   | synonymous    | 0 | 2 |
| AAMP     | chr2  | 219129266/G//A   | nonsynonymous | 0 | 2 |
| SLC6A20  | chr3  | 45800504/C//T    | nonsynonymous | 0 | 2 |
| QRICH1   | chr3  | 49114190/TTG//T  | nonsynonymous | 0 | 2 |
| BSN      | chr3  | 49701983/G//A    | synonymous    | 0 | 2 |
| ATR      | chr3  | 142266595/G//A   | nonsynonymous | 0 | 2 |
| TM4SF18  | chr3  | 149051052/T//G   | nonsynonymous | 0 | 2 |
| TRIML2   | chr4  | 189022244/G//A   | nonsynonymous | 0 | 2 |
| OSMR     | chr5  | 38925448/G//A    | synonymous    | 0 | 2 |
| DDX41    | chr5  | 176939620/C//T   | nonsynonymous | 0 | 2 |
| PTCHD4   | chr6  | 47847282/G//A    | nonsynonymous | 0 | 2 |
| TINAG    | chr6  | 54186103/C//G    | nonsynonymous | 0 | 2 |
| L3MBTL3  | chr6  | 130392142/C//T   | nonsynonymous | 0 | 2 |
| TAAR9    | chr6  | 132859485/C//T   | synonymous    | 0 | 2 |
| CCDC170  | chr6  | 151894591/C//A   | synonymous    | 0 | 2 |
| DNAAF5   | chr7  | 794233/C//T      | synonymous    | 0 | 2 |
| STAG3    | chr7  | 99778178/G//A    | synonymous    | 0 | 2 |
| ACHE     | chr7  | 100490017/C//T   | synonymous    | 0 | 2 |
| ATP6V0A4 | chr7  | 138417706/G//A   | synonymous    | 0 | 2 |
| TMEM178B | chr7  | 140912481/G//A   | nonsynonymous | 0 | 2 |
| LG13     | chr8  | 22005642/A//G    | synonymous    | 0 | 2 |
| MCM4     | chr8  | 48875347/C//T    | synonymous    | 0 | 2 |
| ZNF623   | chr8  | 144733070/G//A   | nonsynonymous | 0 | 2 |
| CLTA     | chr9  | 36211661/C//T    | nonsynonymous | 0 | 2 |
| BICD2    | chr9  | 95482989/TCTC//T | nonsynonymous | 0 | 2 |
| WNK2     | chr9  | 96055334/A//T    | nonsynonymous | 0 | 2 |
| AKNA     | chr9  | 117120450/G//A   | synonymous    | 0 | 2 |
| ANKRD30A | chr10 | 37431046/G//A    | synonymous    | 0 | 2 |
| C10orf71 | chr10 | 50531955/C//T    | synonymous    | 0 | 2 |
| SRSF8    | chr11 | 94801131/T//C    | synonymous    | 0 | 2 |
| KCNA5    | chr12 | 5154394/G//A     | nonsynonymous | 0 | 2 |
| NACA     | chr12 | 57114715/T//C    | nonsynonymous | 0 | 2 |
| SLC16A7  | chr12 | 60168559/G//A    | synonymous    | 0 | 2 |
| ORAI1    | chr12 | 122079491/A//G   | nonsynonymous | 0 | 2 |
| HTR2A    | chr13 | 47466707/G//A    | nonsynonymous | 0 | 2 |
|          | chr14 | 65417778/G//A    | synonymous    | 0 | 2 |
| ISLR2    | chr15 | 74426447/C//T    | nonsynonymous | 0 | 2 |
| SLX4     | chr16 | 3632599/G//A     | nonsynonymous | 0 | 2 |
| DOC2A    | chr16 | 30017814/A//C    | nonsynonymous | 0 | 2 |
| HYDIN    | chr16 | 70995856/G//A    | synonymous    | 0 | 2 |
| MBTPS1   | chr16 | 84129261/G//A    | nonsynonymous | 0 | 2 |
| ABR      | chr17 | 961996/G//A      | nonsynonymous | 0 | 2 |
| MYO15A   | chr17 | 18022871/C//T    | nonsynonymous | 0 | 2 |
| NGFR     | chr17 | 47590321/G//A    | nonsynonymous | 0 | 2 |
| ITGB4    | chr17 | 73733432/C//T    | nonsynonymous | 0 | 2 |
| CBX8     | chr17 | 77769058/G//A    | synonymous    | 0 | 2 |
| DENND1C  | chr19 | 6477288/C//T     | nonsynonymous | 0 | 2 |
| CST2     | chr20 | 23807255/G//T    | nonsynonymous | 0 | 2 |

|           |       |                       |               |   |   |
|-----------|-------|-----------------------|---------------|---|---|
| KRTAP27-1 | chr21 | 31709720/G//A         | synonymous    | 0 | 2 |
| TMEM39B   | chr1  | 32557556/G//A         | nonsynonymous | 0 | 2 |
| WDR77     | chr1  | 111986541/G//C        | nonsynonymous | 0 | 2 |
| OR2M5     | chr1  | 248309246/G//T        | nonsynonymous | 0 | 2 |
| TRIB2     | chr2  | 12880757/G//A         | nonsynonymous | 0 | 2 |
| LRP2      | chr2  | 170068568/A//T        | nonsynonymous | 0 | 2 |
| TTN       | chr2  | 179403751/G//A        | nonsynonymous | 0 | 2 |
| HECW2     | chr2  | 197185133/T//C        | synonymous    | 0 | 2 |
| MAP2      | chr2  | 210557684/G//T        | nonsynonymous | 0 | 2 |
| RUFY4     | chr2  | 218940309/C//T        | nonsynonymous | 0 | 2 |
| SLC4A3    | chr2  | 220493871/C//T        | nonsynonymous | 0 | 2 |
| KLHL18    | chr3  | 47378159/G//A         | nonsynonymous | 0 | 2 |
| TBC1D1    | chr4  | 38016321/C//G         | synonymous    | 0 | 2 |
| TLR6      | chr4  | 38829781/A//T         | nonsynonymous | 0 | 2 |
| ENOPH1    | chr4  | 83381215/A//AGACTTACT | nonsynonymous | 0 | 2 |
| NUDT9     | chr4  | 88356254/C//T         | nonsynonymous | 0 | 2 |
| CCSER1    | chr4  | 91234082/G//A         | nonsynonymous | 0 | 2 |
| UNC5C     | chr4  | 96106239/C//T         | nonsynonymous | 0 | 2 |
| ANK2      | chr4  | 114163368/G//A        | synonymous    | 0 | 2 |
| PCDH18    | chr4  | 138451498/C//T        | nonsynonymous | 0 | 2 |
| PCDHA3    | chr5  | 140182025/C//T        | nonsynonymous | 0 | 2 |
| PCDHA5    | chr5  | 140202029/T//C        | synonymous    | 0 | 2 |
| PCDHB11   | chr5  | 140581573/C//T        | synonymous    | 0 | 2 |
| PCDHGB1   | chr5  | 140729862/G//T        | nonsynonymous | 0 | 2 |
| FAM71B    | chr5  | 156589500/G//A        | synonymous    | 0 | 2 |
| HIST1H3C  | chr6  | 26045947/A//G         | synonymous    | 0 | 2 |
| ZNF292    | chr6  | 87970811/T//C         | synonymous    | 0 | 2 |
| CDC40     | chr6  | 110530416/A//C        | nonsynonymous | 0 | 2 |
| THBS2     | chr6  | 169632238/G//A        | nonsynonymous | 0 | 2 |
| DLL1      | chr6  | 170598736/G//T        | nonsynonymous | 0 | 2 |
| FKBP6     | chr7  | 72744246/C//T         | nonsynonymous | 0 | 2 |
| SEMA3D    | chr7  | 84642152/G//A         | nonsynonymous | 0 | 2 |
| ADAM22    | chr7  | 87759746/C//T         | nonsynonymous | 0 | 2 |
| KIAA1549  | chr7  | 138601708/G//A        | synonymous    | 0 | 2 |
| SSPO      | chr7  | 149522197/C//T        | synonymous    | 0 | 2 |
| DLGAP2    | chr8  | 1626412/C//T          | nonsynonymous | 0 | 2 |
| CSMD1     | chr8  | 2944703/G//A          | nonsynonymous | 0 | 2 |
| ADAM28    | chr8  | 24184140/G//A         | nonsynonymous | 0 | 2 |
| ADAM18    | chr8  | 39442090/G//A         | synonymous    | 0 | 2 |
| PENK      | chr8  | 57354129/C//T         | nonsynonymous | 0 | 2 |
| WASHC5    | chr8  | 126068993/C//T        | nonsynonymous | 0 | 2 |
| PTPRD     | chr9  | 8449762/G//T          | nonsynonymous | 0 | 2 |
| PHF2      | chr9  | 96439019/C//A         | synonymous    | 1 | 1 |
| POLR3A    | chr10 | 79777416/C//T         | nonsynonymous | 0 | 2 |
| LDB1      | chr10 | 103869712/C//T        | nonsynonymous | 0 | 2 |
| COL17A1   | chr10 | 105816860/G//A        | synonymous    | 0 | 2 |
| OR4C16    | chr11 | 55340116/GATCA//G     | nonsynonymous | 0 | 2 |
| INTS5     | chr11 | 62417296/G//A         | nonsynonymous | 0 | 2 |
| PCNX3     | chr11 | 65384943/G//A         | synonymous    | 0 | 2 |
| GRK2      | chr11 | 67051322/C//T         | synonymous    | 0 | 2 |
| ST8SIA1   | chr12 | 22354607/G//A         | nonsynonymous | 0 | 2 |
| PRKAG1    | chr12 | 49399286/C//T         | nonsynonymous | 0 | 2 |
| TBX5      | chr12 | 114841612/G//A        | nonsynonymous | 0 | 2 |
| SLITRK5   | chr13 | 88329003/G//A         | nonsynonymous | 0 | 2 |
| CCDC168   | chr13 | 103396902/C//A        | nonsynonymous | 0 | 2 |
| ATP10A    | chr15 | 25959230/C//T         | synonymous    | 0 | 2 |
| OTUD7A    | chr15 | 31776456/G//A         | nonsynonymous | 0 | 2 |
| C15orf65  | chr15 | 55710600/T//C         | synonymous    | 0 | 2 |
| PTPN9     | chr15 | 75798093/G//A         | synonymous    | 0 | 2 |
| AP3B2     | chr15 | 83333604/G//A         | nonsynonymous | 0 | 2 |
| CAPN15    | chr16 | 601548/C//T           | synonymous    | 0 | 2 |
| RHBDL1    | chr16 | 727886/G//A           | nonsynonymous | 0 | 2 |
| CREBBP    | chr16 | 3786125/T//C          | nonsynonymous | 0 | 2 |
| ZNF423    | chr16 | 49670758/C//T         | nonsynonymous | 0 | 2 |
| NOD2      | chr16 | 50746117/G//C         | synonymous    | 0 | 2 |
| ADGRG1    | chr16 | 57687155/G//A         | nonsynonymous | 0 | 2 |
| ALOX12    | chr17 | 6909894/C//A          | nonsynonymous | 0 | 2 |
| TP53      | chr17 | 7577130/A//G          | nonsynonymous | 0 | 2 |
| AARSD1    | chr17 | 41103884/C//T         | nonsynonymous | 0 | 2 |
| SPPL2C    | chr17 | 43923925/C//T         | synonymous    | 0 | 2 |

|           |       |                |               |   |   |
|-----------|-------|----------------|---------------|---|---|
| HOXB3     | chr17 | 46629479/C//T  | nonsynonymous | 0 | 2 |
| PSMA8     | chr18 | 23713838/C//T  | synonymous    | 0 | 2 |
| SLC14A2   | chr18 | 43246115/C//T  | synonymous    | 0 | 2 |
| KANK2     | chr19 | 11303842/G//T  | nonsynonymous | 0 | 2 |
| ZNF536    | chr19 | 30935058/C//T  | nonsynonymous | 0 | 2 |
| FAM187B   | chr19 | 35719438/G//A  | nonsynonymous | 0 | 2 |
| CD3EAP    | chr19 | 45912282/G//A  | synonymous    | 0 | 2 |
| PRPF31    | chr19 | 54625276/C//T  | synonymous    | 0 | 2 |
| KIR2DL1   | chr19 | 55286780/C//A  | nonsynonymous | 0 | 2 |
| SLC27A5   | chr19 | 59021214/C//T  | nonsynonymous | 0 | 2 |
| PRNP      | chr20 | 4679944/G//A   | synonymous    | 0 | 2 |
| CST1      | chr20 | 23731299/G//A  | nonsynonymous | 0 | 2 |
| SMARCB1   | chr22 | 24133988/T//C  | nonsynonymous | 0 | 2 |
| SF3A1     | chr22 | 30737727/G//A  | nonsynonymous | 0 | 2 |
| SLC35E4   | chr22 | 31042989/C//T  | nonsynonymous | 0 | 2 |
| RFPL2     | chr22 | 32586754/A//T  | synonymous    | 0 | 2 |
| MXRA5     | chrX  | 3235606/C//T   | nonsynonymous | 0 | 2 |
| NHS       | chrX  | 17744831/G//T  | nonsynonymous | 0 | 2 |
| ZNF138    | chr7  | 64292280/A//G  | synonymous    | 2 | 0 |
|           | chr1  | 6111702/C//T   | synonymous    | 0 | 2 |
| HRNR      | chr1  | 152193605/C//A | nonsynonymous | 0 | 2 |
| PGLYRP3   | chr1  | 153270589/G//A | nonsynonymous | 0 | 2 |
| CFAP45    | chr1  | 159842861/C//T | nonsynonymous | 0 | 2 |
| LHX9      | chr1  | 197896850/T//A | nonsynonymous | 0 | 2 |
| PSME4     | chr2  | 54176365/T//G  | nonsynonymous | 0 | 2 |
| COL6A3    | chr2  | 238243486/G//A | synonymous    | 0 | 2 |
| GRM7      | chr3  | 7620446/C//T   | nonsynonymous | 0 | 2 |
| SLC22A14  | chr3  | 38348789/G//T  | nonsynonymous | 0 | 2 |
| NLGN1     | chr3  | 173996842/C//T | nonsynonymous | 0 | 2 |
| FBXW7     | chr4  | 153247289/G//A | nonsynonymous | 0 | 2 |
| TLR3      | chr4  | 187005807/T//C | nonsynonymous | 0 | 2 |
| SLC1A3    | chr5  | 36679839/G//T  | nonsynonymous | 0 | 2 |
| CARD6     | chr5  | 40852540/A//G  | nonsynonymous | 0 | 2 |
| APC       | chr5  | 112175133/C//A | nonsynonymous | 0 | 2 |
| JADE2     | chr5  | 133914336/G//A | nonsynonymous | 0 | 2 |
| PCDHB5    | chr5  | 140515207/C//T | nonsynonymous | 0 | 2 |
| ARAP3     | chr5  | 141051796/C//G | synonymous    | 0 | 2 |
| PRELID1   | chr5  | 176733145/A//C | nonsynonymous | 0 | 2 |
| MDN1      | chr6  | 90457158/C//T  | nonsynonymous | 0 | 2 |
| DNAH11    | chr7  | 21920447/T//G  | nonsynonymous | 0 | 2 |
| EVX1      | chr7  | 27284697/C//T  | nonsynonymous | 0 | 2 |
| MPDZ      | chr9  | 13121844/A//T  | nonsynonymous | 0 | 2 |
| PCSK5     | chr9  | 78853887/G//A  | nonsynonymous | 0 | 2 |
| OR1N1     | chr9  | 125288841/G//A | synonymous    | 0 | 2 |
| OR1B1     | chr9  | 125391391/G//A | nonsynonymous | 0 | 2 |
| HPX       | chr11 | 6452905/G//T   | synonymous    | 0 | 2 |
| OR5P2     | chr11 | 7818171/C//T   | nonsynonymous | 0 | 2 |
| MFRP      | chr11 | 119213352/G//A | synonymous    | 0 | 2 |
| CHD4      | chr12 | 6705221/C//T   | nonsynonymous | 0 | 2 |
| PTPRQ     | chr12 | 80904201/T//A  | nonsynonymous | 0 | 2 |
| EP400     | chr12 | 132514266/C//T | nonsynonymous | 0 | 2 |
| PCK2      | chr14 | 24569430/C//A  | synonymous    | 0 | 2 |
|           | chr14 | 35515685/C//T  | synonymous    | 0 | 2 |
| FLRT2     | chr14 | 86088234/C//T  | nonsynonymous | 0 | 2 |
| TTC7B     | chr14 | 91211166/G//A  | synonymous    | 0 | 2 |
| ATP10A    | chr15 | 26026194/C//T  | nonsynonymous | 0 | 2 |
| OCA2      | chr15 | 28116339/C//T  | synonymous    | 0 | 2 |
| HAUS2     | chr15 | 42851532/T//C  | synonymous    | 0 | 2 |
| VEZF1     | chr17 | 56058146/G//A  | nonsynonymous | 0 | 2 |
| SMAD4     | chr18 | 48584560/C//T  | nonsynonymous | 0 | 2 |
| HNRNPL    | chr19 | 39336502/C//A  | synonymous    | 0 | 2 |
| PRX       | chr19 | 40903079/G//A  | nonsynonymous | 0 | 2 |
| KIR3DL3   | chr19 | 55239218/G//A  | nonsynonymous | 0 | 2 |
| SUN5      | chr20 | 31571645/C//T  | synonymous    | 0 | 2 |
| KRTAP13-4 | chr21 | 31802793/G//A  | nonsynonymous | 0 | 2 |
| RRP1B     | chr21 | 45092225/G//A  | nonsynonymous | 0 | 2 |
| FAM47A    | chrX  | 34148222/T//C  | nonsynonymous | 0 | 2 |
| AJAP1     | chr1  | 4772695/T//G   | synonymous    | 0 | 2 |
| GJB3      | chr1  | 35250741/C//A  | synonymous    | 0 | 2 |
| MPL       | chr1  | 43805146/G//A  | nonsynonymous | 0 | 2 |

|               |       |                  |               |   |   |
|---------------|-------|------------------|---------------|---|---|
| PTPRF         | chr1  | 44069536/G//A    | nonsynonymous | 0 | 2 |
| USP24         | chr1  | 55627881/G//A    | synonymous    | 0 | 2 |
| SPTA1         | chr1  | 158592962/C//A   | synonymous    | 0 | 2 |
| C2orf71       | chr2  | 29295432/C//G    | nonsynonymous | 0 | 2 |
| C2orf71       | chr2  | 29296972/G//A    | synonymous    | 0 | 2 |
| LIPT1         | chr2  | 99779177/G//C    | nonsynonymous | 0 | 2 |
| THSD7B        | chr2  | 138208561/C//T   | nonsynonymous | 0 | 2 |
| DCLK3         | chr3  | 36763056/G//T    | nonsynonymous | 0 | 2 |
| TRPC1         | chr3  | 142522979/C//G   | nonsynonymous | 0 | 2 |
| ZIC1          | chr3  | 147128336/T//G   | nonsynonymous | 0 | 2 |
| LIPH          | chr3  | 185229397/T//C   | nonsynonymous | 0 | 2 |
| ANK2          | chr4  | 114275101/G//A   | nonsynonymous | 0 | 2 |
| TTC23L        | chr5  | 34864626/A//G    | synonymous    | 0 | 2 |
| PCDHA6        | chr5  | 140208003/C//T   | synonymous    | 0 | 2 |
| PCDHB3        | chr5  | 140481830/G//A   | nonsynonymous | 0 | 2 |
| PCDHGA5       | chr5  | 140744765/G//C   | nonsynonymous | 0 | 2 |
| MAK           | chr6  | 10796300/A//T    | synonymous    | 0 | 2 |
| TEAD3         | chr6  | 35445093/A//G    | nonsynonymous | 0 | 2 |
| ME1           | chr6  | 84117563/G//A    | nonsynonymous | 0 | 2 |
| SLC35D3       | chr6  | 137245018/C//T   | synonymous    | 0 | 2 |
| ADGB          | chr6  | 147067231/G//T   | nonsynonymous | 0 | 2 |
| AEBP1         | chr7  | 44153782/AGAG//A | nonsynonymous | 0 | 2 |
| ADCY1         | chr7  | 45717589/G//A    | nonsynonymous | 0 | 2 |
| CNTNAP2       | chr7  | 147259256/T//G   | nonsynonymous | 0 | 2 |
| B4GALT1       | chr9  | 33113514/G//A    | synonymous    | 0 | 2 |
| SPATA31D1     | chr9  | 84606779/C//G    | nonsynonymous | 0 | 2 |
| COL27A1       | chr9  | 117068826/G//A   | synonymous    | 0 | 2 |
| BRINP1        | chr9  | 121976221/C//T   | nonsynonymous | 0 | 2 |
| PRRC2B        | chr9  | 134312072/C//T   | nonsynonymous | 0 | 2 |
| STKLD1        | chr9  | 136268101/C//T   | synonymous    | 0 | 2 |
| GJD4          | chr10 | 35897414/T//C    | nonsynonymous | 0 | 2 |
| SLC35C1       | chr11 | 45832809/G//A    | nonsynonymous | 0 | 2 |
| MPEG1         | chr11 | 58980176/G//A    | nonsynonymous | 0 | 2 |
| FAT3          | chr11 | 92531907/C//G    | nonsynonymous | 0 | 2 |
| NCOR2         | chr12 | 124829261/C//A   | nonsynonymous | 0 | 2 |
| TMEM132B      | chr12 | 125900226/A//T   | synonymous    | 0 | 2 |
| FZD10         | chr12 | 130648880/G//A   | nonsynonymous | 0 | 2 |
| CHFR          | chr12 | 133423650/G//A   | nonsynonymous | 0 | 2 |
| COG6          | chr13 | 40235011/G//A    | nonsynonymous | 0 | 2 |
| GPR18         | chr13 | 99907960/G//A    | nonsynonymous | 0 | 2 |
| ATP11A        | chr13 | 113473668/C//T   | synonymous    | 0 | 2 |
| TMEM255B      | chr13 | 114503858/A//T   | nonsynonymous | 0 | 2 |
| NYNRIN        | chr14 | 24886019/C//T    | synonymous    | 0 | 2 |
| TMEM63C       | chr14 | 77685925/G//A    | synonymous    | 0 | 2 |
| NRXN3         | chr14 | 80130234/C//T    | synonymous    | 1 | 1 |
| TSHR          | chr14 | 81610414/C//T    | nonsynonymous | 0 | 2 |
| BEGAIN        | chr14 | 101004410/C//T   | nonsynonymous | 0 | 2 |
| AHNAK2        | chr14 | 105408233/C//T   | nonsynonymous | 0 | 2 |
| ITPKA         | chr15 | 41794213/G//A    | synonymous    | 0 | 2 |
| JMJD7-PLA2G4B | chr15 | 42132384/C//T    | nonsynonymous | 0 | 2 |
| TLN2          | chr15 | 62985084/G//A    | nonsynonymous | 0 | 2 |
| SALL1         | chr16 | 51174874/G//A    | nonsynonymous | 0 | 2 |
| PLA2G15       | chr16 | 68289802/G//A    | synonymous    | 0 | 2 |
| SPIRE2        | chr16 | 89936544/G//A    | nonsynonymous | 0 | 2 |
| SLC16A11      | chr17 | 6945853/G//A     | synonymous    | 0 | 2 |
| CDH2          | chr18 | 25573526/C//T    | nonsynonymous | 0 | 2 |
| ONECUT3       | chr19 | 1754717/T//A     | synonymous    | 0 | 2 |
| CLEC4M        | chr19 | 7831683/C//T     | nonsynonymous | 0 | 2 |
| MUC16         | chr19 | 9069343/G//T     | nonsynonymous | 0 | 2 |
| TMEM221       | chr19 | 17547373/C//T    | nonsynonymous | 0 | 2 |
| HCK           | chr20 | 30689254/G//A    | nonsynonymous | 0 | 2 |
| SYCP2         | chr20 | 58449037/A//C    | synonymous    | 0 | 2 |
| DSCAM         | chr21 | 41560972/C//A    | synonymous    | 0 | 2 |
| RFPL2         | chr22 | 32590383/G//C    | nonsynonymous | 0 | 2 |
| CELSR1        | chr22 | 46777907/C//T    | synonymous    | 0 | 2 |
| PLCXD1        | chrX  | 215903/G//A      | synonymous    | 0 | 2 |
| FAM120C       | chrX  | 54160429/C//T    | nonsynonymous | 0 | 2 |
| CXorf40B      | chrX  | 149101841/C//T   | synonymous    | 0 | 2 |
| KRTAP5-1      | chr11 | 1606177/G//A     | synonymous    | 1 | 1 |
| EXOSC10       | chr1  | 11148191/G//A    | nonsynonymous | 0 | 2 |

|          |       |                |               |   |   |
|----------|-------|----------------|---------------|---|---|
| PDIK1L   | chr1  | 26448961/C//G  | nonsynonymous | 0 | 2 |
| RAD54L   | chr1  | 46725713/G//A  | nonsynonymous | 0 | 2 |
| BEND5    | chr1  | 49202110/G//A  | synonymous    | 0 | 2 |
| CYR61    | chr1  | 86047865/C//T  | nonsynonymous | 0 | 2 |
| NTRK1    | chr1  | 156845316/G//A | synonymous    | 0 | 2 |
| PGBD5    | chr1  | 230468761/C//T | nonsynonymous | 0 | 2 |
| OR2C3    | chr1  | 247695442/G//A | synonymous    | 0 | 2 |
| OR11L1   | chr1  | 248004552/C//T | nonsynonymous | 0 | 2 |
| TRAPPC12 | chr2  | 3391892/C//T   | synonymous    | 0 | 2 |
| SLC5A7   | chr2  | 108622549/C//A | synonymous    | 0 | 2 |
| NEB      | chr2  | 152541388/G//A | synonymous    | 0 | 2 |
| TTN      | chr2  | 179465997/G//A | nonsynonymous | 0 | 2 |
| UNC80    | chr2  | 210737560/C//T | nonsynonymous | 0 | 2 |
| COL6A3   | chr2  | 238249315/C//T | synonymous    | 0 | 2 |
| CADPS    | chr3  | 62739268/G//A  | nonsynonymous | 0 | 2 |
| VGLL3    | chr3  | 87039905/C//T  | synonymous    | 0 | 2 |
| ABI3BP   | chr3  | 100567677/C//T | nonsynonymous | 0 | 2 |
| KALRN    | chr3  | 124281775/C//T | nonsynonymous | 0 | 2 |
| HEG1     | chr3  | 124731591/G//A | synonymous    | 0 | 2 |
| RNF168   | chr3  | 196198821/G//A | nonsynonymous | 0 | 2 |
| EPHA5    | chr4  | 66201723/C//A  | nonsynonymous | 0 | 2 |
| FBXW7    | chr4  | 153249384/C//T | nonsynonymous | 0 | 2 |
| FBXW7    | chr4  | 153249504/C//A | nonsynonymous | 0 | 2 |
| WDR17    | chr4  | 177056255/C//T | synonymous    | 0 | 2 |
| IRX4     | chr5  | 1882101/C//T   | nonsynonymous | 0 | 2 |
| APC      | chr5  | 112173531/C//A | nonsynonymous | 0 | 2 |
| PCDHA4   | chr5  | 140188931/C//T | nonsynonymous | 0 | 2 |
| PCDHB12  | chr5  | 140590002/C//T | nonsynonymous | 0 | 2 |
| PCDHGA1  | chr5  | 140712483/C//T | synonymous    | 0 | 2 |
| PCDHGA12 | chr5  | 140810848/G//T | synonymous    | 0 | 2 |
| TCOF1    | chr5  | 149771158/G//A | nonsynonymous | 0 | 2 |
| FAM196B  | chr5  | 169309942/C//T | nonsynonymous | 0 | 2 |
| GFPT2    | chr5  | 179755287/C//T | nonsynonymous | 0 | 2 |
| TFAP2A   | chr6  | 10410285/G//A  | nonsynonymous | 0 | 2 |
| TREM1    | chr6  | 41250249/C//T  | nonsynonymous | 0 | 2 |
| RIMS1    | chr6  | 73110298/G//T  | nonsynonymous | 0 | 2 |
| COL12A1  | chr6  | 75853014/C//T  | nonsynonymous | 0 | 2 |
| GLI3     | chr7  | 42004661/G//A  | nonsynonymous | 0 | 2 |
| TRIM56   | chr7  | 100732070/T//C | nonsynonymous | 0 | 2 |
| SND1     | chr7  | 127729551/G//A | nonsynonymous | 0 | 2 |
| HTR5A    | chr7  | 154876000/G//A | nonsynonymous | 0 | 2 |
| DLGAP2   | chr8  | 1626444/G//A   | nonsynonymous | 0 | 2 |
| OPLAH    | chr8  | 145114792/G//A | synonymous    | 0 | 2 |
| ACO1     | chr9  | 32420939/C//T  | nonsynonymous | 0 | 2 |
| USP20    | chr9  | 132631613/G//A | nonsynonymous | 0 | 2 |
| CUBN     | chr10 | 16949566/G//A  | nonsynonymous | 0 | 2 |
| C10orf10 | chr10 | 45473072/T//A  | nonsynonymous | 0 | 2 |
| C10orf71 | chr10 | 50533357/C//T  | nonsynonymous | 0 | 2 |
| PRF1     | chr10 | 72360448/C//T  | nonsynonymous | 0 | 2 |
| PDZD8    | chr10 | 119044307/G//C | nonsynonymous | 0 | 2 |
| CYP2E1   | chr10 | 135345657/G//A | nonsynonymous | 0 | 2 |
| HRAS     | chr11 | 533907/G//A    | nonsynonymous | 0 | 2 |
| DNHD1    | chr11 | 6580224/C//T   | nonsynonymous | 0 | 2 |
| LRTOMT   | chr11 | 71819857/G//A  | synonymous    | 0 | 2 |
| FAT3     | chr11 | 92534532/G//T  | nonsynonymous | 0 | 2 |
| ARHGAP32 | chr11 | 128842397/A//G | nonsynonymous | 0 | 2 |
| C12orf40 | chr12 | 40114849/C//T  | synonymous    | 0 | 2 |
| DBX2     | chr12 | 45444763/C//T  | synonymous    | 0 | 2 |
| KMT2D    | chr12 | 49440049/C//T  | nonsynonymous | 0 | 2 |
| CERS5    | chr12 | 50524462/G//T  | nonsynonymous | 0 | 2 |
| MFSD5    | chr12 | 53647879/G//T  | synonymous    | 0 | 2 |
| TBX3     | chr12 | 115114117/C//T | nonsynonymous | 0 | 2 |
| MMP17    | chr12 | 132325304/C//T | synonymous    | 0 | 2 |
| SACS     | chr13 | 23910620/C//T  | synonymous    | 0 | 2 |
| CKAP2    | chr13 | 53049067/G//A  | nonsynonymous | 0 | 2 |
| NALCN    | chr13 | 101881824/G//A | nonsynonymous | 0 | 2 |
| OCA2     | chr15 | 28116374/C//T  | nonsynonymous | 0 | 2 |
|          | chr15 | 50578233/C//T  | synonymous    | 0 | 2 |
| USP50    | chr15 | 50835990/G//A  | synonymous    | 0 | 2 |
| IFT140   | chr16 | 1637986/C//T   | nonsynonymous | 0 | 2 |

|             |       |                  |               |   |   |
|-------------|-------|------------------|---------------|---|---|
| DNAH9       | chr17 | 11806178/G//A    | nonsynonymous | 0 | 2 |
| ZNF207      | chr17 | 30694972/C//T    | nonsynonymous | 0 | 2 |
| GPR179      | chr17 | 36491542/G//A    | synonymous    | 0 | 2 |
| SOST        | chr17 | 41832768/G//A    | nonsynonymous | 0 | 2 |
| ANKRD24     | chr19 | 4216762/G//A     | synonymous    | 0 | 2 |
| LONP1       | chr19 | 5705931/G//C     | nonsynonymous | 0 | 2 |
| DNM2        | chr19 | 10930670/G//A    | synonymous    | 0 | 2 |
| CC2D1A      | chr19 | 14029610/C//T    | nonsynonymous | 0 | 2 |
| OR10H2      | chr19 | 15839090/G//A    | synonymous    | 0 | 2 |
| USHBP1      | chr19 | 17373566/G//T    | nonsynonymous | 0 | 2 |
| ZNF91       | chr19 | 23544842/C//A    | nonsynonymous | 0 | 2 |
| PRODH2      | chr19 | 36303732/C//T    | nonsynonymous | 0 | 2 |
| SPTBN4      | chr19 | 41012284/C//A    | nonsynonymous | 0 | 2 |
| CEACAM7     | chr19 | 42191081/C//T    | nonsynonymous | 0 | 2 |
| GYS1        | chr19 | 49472811/G//A    | nonsynonymous | 0 | 2 |
| RCN3        | chr19 | 50031913/C//T    | nonsynonymous | 0 | 2 |
| ZNF816      | chr19 | 53454186/C//T    | nonsynonymous | 0 | 2 |
| LILRB5      | chr19 | 54756839/G//A    | nonsynonymous | 0 | 2 |
| ATRN        | chr20 | 3619532/G//A     | nonsynonymous | 0 | 2 |
| PAX1        | chr20 | 21695297/C//T    | synonymous    | 0 | 2 |
| KCNK15      | chr20 | 43374711/T//C    | nonsynonymous | 0 | 2 |
|             | chr20 | 60074496/C//T    | synonymous    | 0 | 2 |
| UCKL1       | chr20 | 62571772/A//T    | nonsynonymous | 0 | 2 |
| ELFN2       | chr22 | 37769636/C//T    | nonsynonymous | 0 | 2 |
| NPTXR       | chr22 | 39224324/A//G    | nonsynonymous | 0 | 2 |
| HCCS        | chrX  | 11130237/G//A    | synonymous    | 0 | 2 |
| MAP7D2      | chrX  | 20082881/G//A    | nonsynonymous | 0 | 2 |
| RBM10       | chrX  | 47045987/G//A    | nonsynonymous | 0 | 2 |
| MAGED1      | chrX  | 51637376/C//T    | synonymous    | 0 | 2 |
| FGD1        | chrX  | 54496521/G//A    | synonymous    | 0 | 2 |
| PFKFB1      | chrX  | 54978378/C//T    | nonsynonymous | 0 | 2 |
| AMER1       | chrX  | 63411567/C//A    | nonsynonymous | 0 | 2 |
| NHSL2       | chrX  | 71357066/C//T    | nonsynonymous | 0 | 2 |
| PCDH11X     | chrX  | 91873660/C//T    | synonymous    | 0 | 2 |
| HTR2C       | chrX  | 114141278/C//T   | nonsynonymous | 0 | 2 |
| XPNPEP2     | chrX  | 128880287/T//G   | nonsynonymous | 0 | 2 |
| FLNA        | chrX  | 153587695/C//T   | nonsynonymous | 0 | 2 |
| PIK3CA      | chr3  | 178921553/T//A   | nonsynonymous | 2 | 0 |
| RS1         | chrX  | 18674876/A//C    | nonsynonymous | 1 | 1 |
| NPHP4       | chr1  | 5947423/A//G     | nonsynonymous | 0 | 2 |
| H6PD        | chr1  | 9324542/G//T     | nonsynonymous | 0 | 2 |
| SF3B4       | chr1  | 149897784/G//C   | nonsynonymous | 0 | 2 |
| ATP8B2      | chr1  | 154313419/G//T   | nonsynonymous | 0 | 2 |
| RGS8        | chr1  | 182635145/G//A   | nonsynonymous | 0 | 2 |
| HMCN1       | chr1  | 186056576/G//A   | synonymous    | 0 | 2 |
| REN         | chr1  | 204125866/C//T   | nonsynonymous | 0 | 2 |
| C4BPA       | chr1  | 207307809/G//A   | nonsynonymous | 0 | 2 |
| USH2A       | chr1  | 216496942/G//A   | nonsynonymous | 0 | 2 |
| SPATA17-AS1 | chr1  | 217955487/A//T   | synonymous    | 0 | 2 |
| RYR2        | chr1  | 237713944/C//T   | nonsynonymous | 0 | 2 |
| CNST        | chr1  | 246754806/C//A   | synonymous    | 0 | 2 |
| IAH1        | chr2  | 9616143/G//A     | nonsynonymous | 0 | 2 |
| HAAO        | chr2  | 42995017/C//T    | nonsynonymous | 0 | 2 |
| DUSP11      | chr2  | 74007031/T//G    | nonsynonymous | 0 | 2 |
| ZAP70       | chr2  | 98354366/C//T    | synonymous    | 0 | 2 |
| GLI2        | chr2  | 121746380/G//A   | nonsynonymous | 0 | 2 |
| CACNB4      | chr2  | 152727124/G//A   | nonsynonymous | 0 | 2 |
| FASTKD1     | chr2  | 170394599/ATT//A | nonsynonymous | 0 | 2 |
| TTN         | chr2  | 179422105/G//A   | nonsynonymous | 0 | 2 |
| TTN         | chr2  | 179574287/A//G   | synonymous    | 0 | 2 |
| TTN         | chr2  | 179640851/C//T   | nonsynonymous | 0 | 2 |
| CFAP65      | chr2  | 219884406/C//T   | nonsynonymous | 0 | 2 |
| ZNF660      | chr3  | 44636677/C//A    | nonsynonymous | 0 | 2 |
| NBEAL2      | chr3  | 47047263/A//G    | nonsynonymous | 0 | 2 |
| CEP70       | chr3  | 138291733/G//C   | nonsynonymous | 0 | 2 |
| NLGN1       | chr3  | 173993181/T//A   | synonymous    | 0 | 2 |
| YEATS2      | chr3  | 183493795/G//C   | nonsynonymous | 0 | 2 |
| ZDHHC19     | chr3  | 195936284/C//T   | nonsynonymous | 0 | 2 |
| ZNF721      | chr4  | 437293/A//G      | synonymous    | 1 | 1 |
| PDE6B       | chr4  | 619760/G//A      | synonymous    | 0 | 2 |



|           |       |                     |               |   |   |
|-----------|-------|---------------------|---------------|---|---|
| LOC650293 | chr4  | 8951552/A/T         | nonsynonymous | 0 | 2 |
| BOD1L1    | chr4  | 13601693/G//A       | synonymous    | 0 | 2 |
| DSPP      | chr4  | 88533913/G//A       | nonsynonymous | 0 | 2 |
| KIAA1109  | chr4  | 123260422/C//T      | nonsynonymous | 0 | 2 |
| SPOCK3    | chr4  | 168155253/C//T      | synonymous    | 0 | 2 |
| SEMA5A    | chr5  | 9136646/C//T        | synonymous    | 0 | 2 |
| NLN       | chr5  | 65054607/C//G       | nonsynonymous | 0 | 2 |
| APC       | chr5  | 112175746/T//TG     | nonsynonymous | 0 | 2 |
| ANKHD1    | chr5  | 139876644/C//T      | nonsynonymous | 0 | 2 |
| PCDHB6    | chr5  | 140531787/G//A      | nonsynonymous | 0 | 2 |
| CSF1R     | chr5  | 149460527/G//A      | nonsynonymous | 0 | 2 |
| FAM50B    | chr6  | 3850900/C//T        | synonymous    | 0 | 2 |
| BTN3A2    | chr6  | 26370611/G//A       | synonymous    | 0 | 2 |
| OR2B2     | chr6  | 27879428/C//T       | nonsynonymous | 0 | 2 |
| DNAH8     | chr6  | 38919196/T//G       | synonymous    | 0 | 2 |
| KCNK16    | chr6  | 39290200/C//T       | synonymous    | 0 | 2 |
| RNGTT     | chr6  | 89673114/CTTG//C    | nonsynonymous | 0 | 2 |
| ARFGEF3   | chr6  | 138584412/G//A      | nonsynonymous | 0 | 2 |
| INTS1     | chr7  | 1526999/C//T        | nonsynonymous | 0 | 2 |
| DNAH11    | chr7  | 21583137/G//A       | nonsynonymous | 0 | 2 |
| CAMK2B    | chr7  | 44260447/T//TGTTGAC | nonsynonymous | 0 | 2 |
| ZNF804B   | chr7  | 88964002/G//C       | nonsynonymous | 0 | 2 |
| MUC12     | chr7  | 100649810/C//T      | synonymous    | 0 | 2 |
| SSPO      | chr7  | 149514738/G//T      | synonymous    | 0 | 2 |
| NRG1      | chr8  | 32621346/C//T       | nonsynonymous | 0 | 2 |
| IDO2      | chr8  | 39840262/C//T       | nonsynonymous | 0 | 2 |
| PENK      | chr8  | 57354366/G//A       | nonsynonymous | 0 | 2 |
| PI15      | chr8  | 75737595/C//A       | nonsynonymous | 0 | 2 |
| TMEM261   | chr9  | 7798459/G//T        | synonymous    | 0 | 2 |
| GABBR2    | chr9  | 101216341/C//T      | synonymous    | 0 | 2 |
| COL27A1   | chr9  | 116930092/C//T      | nonsynonymous | 0 | 2 |
| SARDH     | chr9  | 136531892/C//T      | nonsynonymous | 0 | 2 |
| C10orf71  | chr10 | 50532116/G//A       | nonsynonymous | 0 | 2 |
| GFRA1     | chr10 | 117885010/G//A      | synonymous    | 0 | 2 |
| OR4A47    | chr11 | 48510559/C//A       | nonsynonymous | 0 | 2 |
| BIRC3     | chr11 | 102195845/G//A      | nonsynonymous | 0 | 2 |
| DYNC2H1   | chr11 | 103026085/T//A      | nonsynonymous | 0 | 2 |
| ATM       | chr11 | 108165673/C//A      | nonsynonymous | 0 | 2 |
| BCL9L     | chr11 | 118772231/C//A      | nonsynonymous | 0 | 2 |
| GRAMD1B   | chr11 | 123479515/G//A      | synonymous    | 0 | 2 |
| B3GAT1    | chr11 | 134253981/C//T      | nonsynonymous | 0 | 2 |
| PZP       | chr12 | 9353540/T//C        | synonymous    | 0 | 2 |
| GRIN2B    | chr12 | 13717003/G//A       | nonsynonymous | 0 | 2 |
| C12orf40  | chr12 | 40037672/T//A       | nonsynonymous | 0 | 2 |
| UTP20     | chr12 | 101711371/G//C      | nonsynonymous | 0 | 2 |
|           | chr13 | 78493652/G//A       | synonymous    | 0 | 2 |
| SPTLC2    | chr14 | 78083012/T//A       | synonymous    | 0 | 2 |
| ATP10A    | chr15 | 25981229/G//A       | synonymous    | 0 | 2 |
| TMOD2     | chr15 | 52098677/G//A       | nonsynonymous | 0 | 2 |
| RASGRF1   | chr15 | 79254515/G//A       | nonsynonymous | 0 | 2 |
| AGBL1     | chr15 | 87097677/C//T       | nonsynonymous | 0 | 2 |
| SV2B      | chr15 | 91769480/C//T       | synonymous    | 0 | 2 |
| ANKS3     | chr16 | 4755110/G//C        | nonsynonymous | 0 | 2 |
| CCDC189   | chr16 | 30770500/C//T       | synonymous    | 0 | 2 |
| SNX20     | chr16 | 50707972/A//C       | nonsynonymous | 0 | 2 |
| AARS      | chr16 | 70298892/G//A       | synonymous    | 0 | 2 |
| APRT      | chr16 | 88876125/GAGA//G    | nonsynonymous | 0 | 2 |
| MYO1C     | chr17 | 1386947/C//A        | nonsynonymous | 0 | 2 |
| PLXDC1    | chr17 | 37226124/C//T       | synonymous    | 0 | 2 |
| UBE2O     | chr17 | 74395854/G//A       | nonsynonymous | 0 | 2 |
| CXXC1     | chr18 | 47810462/G//A       | synonymous    | 0 | 2 |
| LRRRC8E   | chr19 | 7965443/G//A        | nonsynonymous | 0 | 2 |
| ZNF560    | chr19 | 9577924/C//T        | nonsynonymous | 0 | 2 |
| ANO8      | chr19 | 17434386/C//T       | synonymous    | 0 | 2 |
| ZNF493    | chr19 | 21607687/A//T       | nonsynonymous | 0 | 2 |
| KLC3      | chr19 | 45848946/G//A       | synonymous    | 0 | 2 |
| GRIN2D    | chr19 | 48908228/C//T       | nonsynonymous | 0 | 2 |
| TMC4      | chr19 | 54672341/G//T       | nonsynonymous | 0 | 2 |
| ZNF135    | chr19 | 58578975/A//G       | nonsynonymous | 0 | 2 |
| ZNF837    | chr19 | 58880716/C//A       | synonymous    | 0 | 2 |

|          |       |                 |               |   |   |
|----------|-------|-----------------|---------------|---|---|
| HSPA12B  | chr20 | 3728978/C//T    | nonsynonymous | 0 | 2 |
| ISM1     | chr20 | 13260381/C//T   | nonsynonymous | 0 | 2 |
| CSTL1    | chr20 | 23421075/C//T   | synonymous    | 0 | 2 |
| DSCAM    | chr21 | 41684166/C//T   | nonsynonymous | 0 | 2 |
| MX2      | chr21 | 42762532/C//T   | nonsynonymous | 0 | 2 |
| SEZ6L    | chr22 | 26688639/C//T   | nonsynonymous | 0 | 2 |
| L1CAM    | chrX  | 153128277/G//A  | synonymous    | 0 | 2 |
| HRH2     | chr5  | 175110951/G//A  | nonsynonymous | 1 | 1 |
| IL32     | chr16 | 3119304/A//G    | nonsynonymous | 1 | 1 |
| C1orf159 | chr1  | 1025766/C//T    | nonsynonymous | 0 | 2 |
| PRMT6    | chr1  | 107599525/A//T  | nonsynonymous | 0 | 2 |
| LCE3D    | chr1  | 152552175/C//T  | nonsynonymous | 0 | 2 |
| CD1D     | chr1  | 158151984/A//T  | nonsynonymous | 0 | 2 |
| IGSF8    | chr1  | 160063885/G//A  | synonymous    | 0 | 2 |
| SELP     | chr1  | 169582270/C//T  | synonymous    | 0 | 2 |
| RCOR3    | chr1  | 211486934/C//T  | nonsynonymous | 0 | 2 |
| CCDC85A  | chr2  | 56420199/C//A   | synonymous    | 0 | 2 |
| CNTNAP5  | chr2  | 125671818/G//T  | nonsynonymous | 0 | 2 |
| GALNT13  | chr2  | 155252622/C//T  | nonsynonymous | 0 | 2 |
| TTN      | chr2  | 179641726/C//A  | nonsynonymous | 0 | 2 |
| KIF9     | chr3  | 47282434/C//T   | nonsynonymous | 0 | 2 |
| CHDH     | chr3  | 53857672/A//C   | nonsynonymous | 0 | 2 |
| CPOX     | chr3  | 98309479/C//G   | nonsynonymous | 0 | 2 |
| SPATA16  | chr3  | 172737324/C//T  | nonsynonymous | 0 | 2 |
| FAT4     | chr4  | 126411117/G//A  | synonymous    | 0 | 2 |
| ZNF330   | chr4  | 142143571/C//T  | nonsynonymous | 0 | 2 |
| APC      | chr5  | 112174956/C//A  | nonsynonymous | 0 | 2 |
| PCDHA8   | chr5  | 140222577/C//T  | synonymous    | 0 | 2 |
| FBXO38   | chr5  | 147790333/G//A  | synonymous    | 0 | 2 |
| N4BP3    | chr5  | 177547562/G//A  | synonymous    | 0 | 2 |
| ADAMTS2  | chr5  | 178555111/C//T  | synonymous    | 0 | 2 |
| PPP1R18  | chr6  | 30652228/C//T   | nonsynonymous | 0 | 2 |
| TNXB     | chr6  | 32020751/G//A   | synonymous    | 0 | 2 |
| ADGRB3   | chr6  | 69703704/T//C   | synonymous    | 0 | 2 |
| DACT2    | chr6  | 168708142/C//T  | synonymous    | 0 | 2 |
| CCDC126  | chr7  | 23651027/C//A   | nonsynonymous | 0 | 2 |
| CCM2     | chr7  | 45113101/CAG//C | nonsynonymous | 0 | 2 |
| ABCA13   | chr7  | 48391890/A//G   | synonymous    | 0 | 2 |
| WBSCR17  | chr7  | 70597600/G//A   | synonymous    | 0 | 2 |
| MUC17    | chr7  | 100682890/T//A  | synonymous    | 0 | 2 |
| ERICH5   | chr8  | 99102250/C//T   | synonymous    | 0 | 2 |
| PTPRD    | chr9  | 8499740/C//A    | nonsynonymous | 0 | 2 |
| LMX1B    | chr9  | 129458743/C//T  | synonymous    | 0 | 2 |
| MCM10    | chr10 | 13212950/C//T   | synonymous    | 0 | 2 |
| ARMC3    | chr10 | 23248494/C//T   | synonymous    | 0 | 2 |
| ABCC2    | chr10 | 101591555/T//G  | nonsynonymous | 0 | 2 |
| TCF7L2   | chr10 | 114910883/G//A  | nonsynonymous | 0 | 2 |
| GFRA1    | chr10 | 117885029/G//A  | nonsynonymous | 0 | 2 |
| MRVI1    | chr11 | 10655556/G//A   | synonymous    | 0 | 2 |
| CD6      | chr11 | 60780928/A//G   | nonsynonymous | 0 | 2 |
| TKFC     | chr11 | 61105457/C//T   | synonymous    | 0 | 2 |
| SLC22A11 | chr11 | 64335131/C//T   | synonymous    | 0 | 2 |
| EHD1     | chr11 | 64627508/C//T   | nonsynonymous | 0 | 2 |
| CNTN5    | chr11 | 99827597/C//T   | nonsynonymous | 0 | 2 |
| DDI1     | chr11 | 103907572/G//A  | nonsynonymous | 0 | 2 |
| MPZL3    | chr11 | 118106312/C//T  | synonymous    | 0 | 2 |
| ADAMTS8  | chr11 | 130275813/G//A  | synonymous    | 0 | 2 |
| KDM5A    | chr12 | 420115/C//T     | nonsynonymous | 0 | 2 |
| C1R      | chr12 | 7188341/C//A    | nonsynonymous | 0 | 2 |
| DIP2B    | chr12 | 51138473/G//A   | nonsynonymous | 0 | 2 |
| OR6C6    | chr12 | 55688654/G//A   | synonymous    | 0 | 2 |
| IRAK3    | chr12 | 66583108/C//T   | nonsynonymous | 0 | 2 |
| APAF1    | chr12 | 99059446/G//A   | synonymous    | 0 | 2 |
| MAB21L1  | chr13 | 36049381/G//A   | nonsynonymous | 0 | 2 |
| SERPINE3 | chr13 | 51915295/G//A   | nonsynonymous | 0 | 2 |
| SLC7A8   | chr14 | 23598870/G//A   | nonsynonymous | 0 | 2 |
| SETD3    | chr14 | 99879379/G//A   | nonsynonymous | 0 | 2 |
| AHNAK2   | chr14 | 105413319/G//A  | synonymous    | 0 | 2 |
| UBE3A    | chr15 | 25620658/G//A   | synonymous    | 0 | 2 |
| NEO1     | chr15 | 73590750/C//T   | synonymous    | 0 | 2 |

|              |       |                           |               |   |   |
|--------------|-------|---------------------------|---------------|---|---|
| PRR35        | chr16 | 613540/G//A               | synonymous    | 0 | 2 |
| ZNF646       | chr16 | 31087934/C//G             | nonsynonymous | 0 | 2 |
| TRIM72       | chr16 | 31230620/G//A             | nonsynonymous | 0 | 2 |
|              | chr16 | 67997963/T//C             | synonymous    | 0 | 2 |
| CLEC3A       | chr16 | 78064664/G//T             | nonsynonymous | 0 | 2 |
| TMEM132E     | chr17 | 32964377/G//A             | nonsynonymous | 0 | 2 |
| SLFN5        | chr17 | 33591819/A//G             | nonsynonymous | 0 | 2 |
| KRTAP16-1    | chr17 | 39464337/G//A             | nonsynonymous | 0 | 2 |
| KRT37        | chr17 | 39580491/G//A             | synonymous    | 0 | 2 |
| G6PC3        | chr17 | 42153393/G//A             | synonymous    | 0 | 2 |
| SLC39A11     | chr17 | 71084892/G//T             | synonymous    | 0 | 2 |
| RNF213       | chr17 | 78319794/C//T             | synonymous    | 0 | 2 |
| COLEC12      | chr18 | 335067/G//A               | synonymous    | 0 | 2 |
| KDM4B        | chr19 | 5040028/C//A              | synonymous    | 0 | 2 |
| TSSK6        | chr19 | 19625690/GCACCTCGGGTGA//G | nonsynonymous | 0 | 2 |
| MYH14        | chr19 | 50755899/G//A             | nonsynonymous | 0 | 2 |
| ERVV-2       | chr19 | 53554149/G//A             | synonymous    | 0 | 2 |
| SIGLEC1      | chr20 | 3678674/G//A              | synonymous    | 0 | 2 |
| BTBD3        | chr20 | 11900474/G//A             | nonsynonymous | 0 | 2 |
| KCNS1        | chr20 | 43727218/C//T             | synonymous    | 0 | 2 |
| PCDH11X      | chrX  | 91133712/G//A             | nonsynonymous | 0 | 2 |
| IGSF1        | chrX  | 130409576/G//A            | synonymous    | 0 | 2 |
| CELSR2       | chr1  | 109792751/T//C            | nonsynonymous | 1 | 1 |
| SMAD4        | chr18 | 48591919/G//A             | nonsynonymous | 0 | 2 |
| OR13C2       | chr9  | 107367132/G//A            | synonymous    | 2 | 0 |
| MADD         | chr11 | 47345340/G//A             | nonsynonymous | 1 | 1 |
| AGRN         | chr1  | 977440/G//A               | nonsynonymous | 0 | 2 |
| ARID1A       | chr1  | 27097634/G//T             | nonsynonymous | 0 | 2 |
| PTCH2        | chr1  | 45288139/G//T             | nonsynonymous | 0 | 2 |
| FLG          | chr1  | 152282322/T//C            | nonsynonymous | 0 | 2 |
| FLG2         | chr1  | 152326460/G//A            | nonsynonymous | 0 | 2 |
|              | chr1  | 197704663/A//C            | synonymous    | 0 | 2 |
| SUSD4        | chr1  | 223396838/G//T            | synonymous    | 0 | 2 |
| NRXN1        | chr2  | 50464010/C//T             | nonsynonymous | 0 | 2 |
| REV1         | chr2  | 100017692/C//G            | synonymous    | 0 | 2 |
| TTN          | chr2  | 179592036/G//A            | nonsynonymous | 0 | 2 |
| COL6A3       | chr2  | 238280443/G//A            | nonsynonymous | 0 | 2 |
| KIF1A        | chr2  | 241710464/C//T            | nonsynonymous | 0 | 2 |
| GHRL         | chr3  | 10328487/G//A             | nonsynonymous | 0 | 2 |
| CCDC174      | chr3  | 14708373/C//T             | nonsynonymous | 0 | 2 |
| RAD54L2      | chr3  | 51667640/G//A             | synonymous    | 0 | 2 |
| ROBO1        | chr3  | 78710387/G//C             | nonsynonymous | 0 | 2 |
| VGLL3        | chr3  | 87027847/G//A             | nonsynonymous | 0 | 2 |
| COL6A6       | chr3  | 130293185/C//T            | synonymous    | 0 | 2 |
| LIN54        | chr4  | 83900144/G//A             | nonsynonymous | 0 | 2 |
| GYPA         | chr4  | 145040921/C//T            | synonymous    | 0 | 2 |
| RASGRF2      | chr5  | 80388681/G//A             | synonymous    | 0 | 2 |
| SLCO6A1      | chr5  | 101834473/G//A            | nonsynonymous | 0 | 2 |
| HIST1H1E     | chr6  | 26157169/C//T             | nonsynonymous | 0 | 2 |
| GRIK2        | chr6  | 102074264/A//C            | nonsynonymous | 0 | 2 |
| PARK2        | chr6  | 162683748/C//T            | nonsynonymous | 0 | 2 |
| QKI          | chr6  | 163991773/C//A            | synonymous    | 0 | 2 |
| DACT2        | chr6  | 168710987/GTCCCCCATGC//G  | nonsynonymous | 0 | 2 |
| MRM2         | chr7  | 2281804/T//C              | nonsynonymous | 0 | 2 |
| OSBPL3       | chr7  | 24901368/G//T             | synonymous    | 0 | 2 |
| MUC17        | chr7  | 100683527/G//A            | nonsynonymous | 0 | 2 |
| SSPO         | chr7  | 149500037/G//T            | nonsynonymous | 0 | 2 |
| CSMD1        | chr8  | 3072032/C//A              | synonymous    | 0 | 2 |
| AGPAT5       | chr8  | 6582447/T//C              | nonsynonymous | 0 | 2 |
| MMP16        | chr8  | 89198810/C//T             | nonsynonymous | 0 | 2 |
| FAM78A       | chr9  | 134151254/C//T            | nonsynonymous | 0 | 2 |
| MYO3A        | chr10 | 26491987/C//T             | nonsynonymous | 0 | 2 |
| BICC1        | chr10 | 60380613/A//C             | nonsynonymous | 0 | 2 |
| PALD1        | chr10 | 72285893/G//A             | nonsynonymous | 0 | 2 |
| ASCC1        | chr10 | 73862155/T//C             | nonsynonymous | 0 | 2 |
| NEURL1       | chr10 | 105349996/C//T            | nonsynonymous | 0 | 2 |
| TRIM6-TRIM34 | chr11 | 5664587/G//A              | nonsynonymous | 0 | 2 |
| SLC22A8      | chr11 | 62763294/T//C             | synonymous    | 0 | 2 |
|              | chr11 | 84028117/C//T             | synonymous    | 0 | 2 |
| FAT3         | chr11 | 92533549/G//A             | nonsynonymous | 0 | 2 |

|           |       |                |               |   |   |
|-----------|-------|----------------|---------------|---|---|
| OR8D4     | chr11 | 123777175/C//A | nonsynonymous | 0 | 2 |
| DTX3      | chr12 | 58001242/G//A  | nonsynonymous | 0 | 2 |
| NAV3      | chr12 | 78444704/C//T  | nonsynonymous | 0 | 2 |
| NOS1      | chr12 | 117749357/C//T | nonsynonymous | 0 | 2 |
| MED4      | chr13 | 48654102/C//T  | nonsynonymous | 0 | 2 |
|           | chr14 | 58894871/G//C  | synonymous    | 0 | 2 |
| NTRK3     | chr15 | 88476388/G//A  | nonsynonymous | 0 | 2 |
| BFAR      | chr16 | 14749020/G//A  | nonsynonymous | 0 | 2 |
| PDILT     | chr16 | 20376785/G//A  | synonymous    | 0 | 2 |
| ZNF423    | chr16 | 49670812/G//A  | nonsynonymous | 0 | 2 |
| ZFH3      | chr16 | 72991359/C//T  | nonsynonymous | 0 | 2 |
| RTN4RL1   | chr17 | 1840032/G//A   | nonsynonymous | 0 | 2 |
| DNAH9     | chr17 | 11573085/G//T  | nonsynonymous | 0 | 2 |
| DNAH9     | chr17 | 11573100/C//T  | synonymous    | 0 | 2 |
| ARHGAP44  | chr17 | 12860007/A//G  | nonsynonymous | 0 | 2 |
| ITGA2B    | chr17 | 42460964/G//A  | synonymous    | 0 | 2 |
| ABCC3     | chr17 | 48741216/G//A  | synonymous    | 0 | 2 |
| TSEN54    | chr17 | 73518374/C//T  | synonymous    | 0 | 2 |
| TMEM200C  | chr18 | 5891951/C//T   | nonsynonymous | 0 | 2 |
| PIEZO2    | chr18 | 10773615/C//T  | synonymous    | 0 | 2 |
| TMEM241   | chr18 | 21017910/G//A  | synonymous    | 0 | 2 |
| SF3A2     | chr19 | 2243494/G//A   | nonsynonymous | 0 | 2 |
| FBN3      | chr19 | 8130981/C//T   | nonsynonymous | 0 | 2 |
| MUC16     | chr19 | 9074728/C//T   | nonsynonymous | 0 | 2 |
| CACNA1A   | chr19 | 13428042/C//T  | nonsynonymous | 0 | 2 |
| SLC7A9    | chr19 | 33355156/G//A  | synonymous    | 0 | 2 |
| LG14      | chr19 | 35616141/G//A  | nonsynonymous | 0 | 2 |
|           | chr19 | 37488025/C//T  | synonymous    | 0 | 2 |
| CYP2S1    | chr19 | 41699173/G//C  | nonsynonymous | 0 | 2 |
| ZNF114    | chr19 | 48790083/C//G  | nonsynonymous | 0 | 2 |
| NUP62     | chr19 | 50412516/C//A  | synonymous    | 0 | 2 |
| CD93      | chr20 | 23066707/C//T  | synonymous    | 0 | 2 |
| HEL22     | chr20 | 62197136/C//T  | synonymous    | 0 | 2 |
| GRIK1-AS2 | chr21 | 30968910/A//AC | synonymous    | 0 | 2 |
| MICAL3    | chr22 | 18324730/T//A  | nonsynonymous | 0 | 2 |
| ASCC2     | chr22 | 30221114/G//T  | nonsynonymous | 0 | 2 |
| ASCC2     | chr22 | 30221116/A//T  | nonsynonymous | 0 | 2 |
| TTC38     | chr22 | 46669938/G//A  | nonsynonymous | 0 | 2 |
| PASD1     | chrX  | 150828232/C//T | synonymous    | 0 | 2 |
| FLNA      | chrX  | 153588101/C//A | nonsynonymous | 0 | 2 |
| CAP1      | chr1  | 40525058/G//T  | nonsynonymous | 0 | 2 |
| CYR61     | chr1  | 86048422/G//T  | nonsynonymous | 0 | 2 |
| TDRKH     | chr1  | 151748583/G//T | synonymous    | 0 | 2 |
| OR6N1     | chr1  | 158736265/C//G | nonsynonymous | 0 | 2 |
| KIFAP3    | chr1  | 169993698/C//T | nonsynonymous | 0 | 2 |
| MAP10     | chr1  | 232942380/G//T | nonsynonymous | 0 | 2 |
| RYR2      | chr1  | 237617723/C//T | nonsynonymous | 0 | 2 |
| RYR2      | chr1  | 237777877/C//G | nonsynonymous | 0 | 2 |
| DNAJC27   | chr2  | 25179998/C//A  | nonsynonymous | 0 | 2 |
| EMILIN1   | chr2  | 27306296/G//A  | synonymous    | 0 | 2 |
| LTBP1     | chr2  | 33359988/C//A  | nonsynonymous | 0 | 2 |
| EGR4      | chr2  | 73519207/G//T  | nonsynonymous | 0 | 2 |
| MFSD9     | chr2  | 103348821/G//T | synonymous    | 0 | 2 |
| NCKAP5    | chr2  | 133540350/G//A | nonsynonymous | 0 | 2 |
| FSIP2     | chr2  | 186657368/G//A | synonymous    | 0 | 2 |
| FSIP2     | chr2  | 186671359/G//T | nonsynonymous | 0 | 2 |
| SLC4A3    | chr2  | 220501562/T//G | nonsynonymous | 0 | 2 |
| KIF1A     | chr2  | 241726704/G//A | synonymous    | 0 | 2 |
| ZBTB38    | chr3  | 141162485/G//T | nonsynonymous | 0 | 2 |
| PIK3CA    | chr3  | 178947852/C//A | nonsynonymous | 0 | 2 |
| CHRD      | chr3  | 184104513/C//T | synonymous    | 0 | 2 |
| CNGA1     | chr4  | 47939403/C//T  | nonsynonymous | 0 | 2 |
| UGT2B11   | chr4  | 70070229/C//A  | nonsynonymous | 0 | 2 |
| ANKRD17   | chr4  | 74008042/G//T  | nonsynonymous | 0 | 2 |
| COQ2      | chr4  | 84205700/G//C  | nonsynonymous | 0 | 2 |
| C4orf17   | chr4  | 100434315/G//A | nonsynonymous | 0 | 2 |
| TKTL2     | chr4  | 164394012/G//A | nonsynonymous | 0 | 2 |
| APC       | chr5  | 112175921/G//T | nonsynonymous | 0 | 2 |
| ISOC1     | chr5  | 128442742/T//A | nonsynonymous | 0 | 2 |
| CDSN      | chr6  | 31085263/C//T  | synonymous    | 0 | 2 |

|            |       |                |               |   |   |
|------------|-------|----------------|---------------|---|---|
| DDAH2      | chr6  | 31695346/C//A  | nonsynonymous | 0 | 2 |
| TNXB       | chr6  | 32036591/G//A  | synonymous    | 0 | 2 |
| AGPAT1     | chr6  | 32138359/G//T  | nonsynonymous | 0 | 2 |
| ITPR3      | chr6  | 33652576/C//T  | synonymous    | 0 | 2 |
| TDRD6      | chr6  | 46658018/C//A  | nonsynonymous | 0 | 2 |
| ADGRF5     | chr6  | 46824491/C//T  | synonymous    | 0 | 2 |
| HMGCLL1    | chr6  | 55300485/A//G  | nonsynonymous | 0 | 2 |
| RIMS1      | chr6  | 73110346/C//A  | nonsynonymous | 0 | 2 |
| CD109      | chr6  | 74405963/G//A  | nonsynonymous | 0 | 2 |
| FILIP1     | chr6  | 76023328/C//A  | nonsynonymous | 0 | 2 |
| ADGRG6     | chr6  | 142736162/C//A | nonsynonymous | 0 | 2 |
| CCM2       | chr7  | 45077915/G//T  | nonsynonymous | 0 | 2 |
| IFT22      | chr7  | 100959808/C//A | nonsynonymous | 0 | 2 |
| LSM8       | chr7  | 117825752/A//T | synonymous    | 0 | 2 |
| CHRM2      | chr7  | 136700653/G//T | synonymous    | 0 | 2 |
| CRYGN      | chr7  | 151133319/G//T | nonsynonymous | 0 | 2 |
| CSMD1      | chr8  | 3076924/C//A   | nonsynonymous | 0 | 2 |
| DPYSL2     | chr8  | 26501512/G//T  | nonsynonymous | 0 | 2 |
| PRKDC      | chr8  | 48697850/A//C  | nonsynonymous | 0 | 2 |
| C8orf76    | chr8  | 124253558/C//A | nonsynonymous | 0 | 2 |
| PAPPA      | chr9  | 118974045/T//A | nonsynonymous | 0 | 2 |
| OR1K1      | chr9  | 125562424/C//A | nonsynonymous | 0 | 2 |
| NOC3L      | chr10 | 96114824/G//T  | nonsynonymous | 0 | 2 |
| SF3B2      | chr11 | 65831130/G//T  | nonsynonymous | 0 | 2 |
| FOLR3      | chr11 | 71847014/C//A  | nonsynonymous | 0 | 2 |
| KCNA1      | chr12 | 5021845/A//G   | nonsynonymous | 0 | 2 |
| KCNA5      | chr12 | 5153556/G//A   | synonymous    | 0 | 2 |
| A2M        | chr12 | 9232243/A//G   | nonsynonymous | 0 | 2 |
| DERA       | chr12 | 16185475/G//T  | nonsynonymous | 0 | 2 |
| KRAS       | chr12 | 25380275/T//G  | nonsynonymous | 0 | 2 |
| KRT76      | chr12 | 53171040/G//T  | synonymous    | 0 | 2 |
| MYBPC1     | chr12 | 102061659/C//A | nonsynonymous | 0 | 2 |
| ATP8A2     | chr13 | 26273417/T//C  | nonsynonymous | 0 | 2 |
| RB1        | chr13 | 48951059/C//A  | nonsynonymous | 0 | 2 |
| ITGBL1     | chr13 | 102345012/G//T | nonsynonymous | 0 | 2 |
| OR4K1      | chr14 | 20404482/C//T  | synonymous    | 0 | 2 |
| MTHFD1     | chr14 | 64896895/C//T  | synonymous    | 0 | 2 |
| DIO2       | chr14 | 80669111/G//T  | nonsynonymous | 0 | 2 |
| UNC79      | chr14 | 94004455/G//T  | nonsynonymous | 0 | 2 |
| DICER1     | chr14 | 95598887/C//A  | nonsynonymous | 0 | 2 |
| AHNAK2     | chr14 | 105416060/C//A | nonsynonymous | 0 | 2 |
| BUB1B-PAK6 | chr15 | 40568139/G//T  | synonymous    | 0 | 2 |
| MAP1A      | chr15 | 43815956/G//A  | nonsynonymous | 0 | 2 |
| WDR76      | chr15 | 44143396/G//T  | nonsynonymous | 0 | 2 |
| SPG11      | chr15 | 44888379/G//A  | nonsynonymous | 0 | 2 |
| SLC27A2    | chr15 | 50521189/G//T  | nonsynonymous | 0 | 2 |
| NTRK3      | chr15 | 88669502/C//A  | nonsynonymous | 0 | 2 |
| OR4F15     | chr15 | 102359127/G//T | synonymous    | 0 | 2 |
| PIGQ       | chr16 | 630938/G//A    | synonymous    | 0 | 2 |
| ATP6V0C    | chr16 | 2569368/G//A   | nonsynonymous | 0 | 2 |
| AMDHD2     | chr16 | 2580357/C//A   | nonsynonymous | 0 | 2 |
| GDE1       | chr16 | 19528503/C//A  | nonsynonymous | 0 | 2 |
| LOC81691   | chr16 | 20837172/G//T  | synonymous    | 0 | 2 |
| CHST4      | chr16 | 71571419/C//A  | nonsynonymous | 0 | 2 |
| ZFHX3      | chr16 | 72832035/C//T  | nonsynonymous | 0 | 2 |
| ZDHHC7     | chr16 | 85010005/G//A  | nonsynonymous | 0 | 2 |
| SPG7       | chr16 | 89623414/G//T  | nonsynonymous | 0 | 2 |
| USP6       | chr17 | 5058871/C//A   | nonsynonymous | 0 | 2 |
| TP53       | chr17 | 7577581/A//G   | nonsynonymous | 0 | 2 |
| DNAH9      | chr17 | 11725340/T//C  | synonymous    | 0 | 2 |
| TMEM99     | chr17 | 38991270/G//T  | nonsynonymous | 0 | 2 |
| IMPA2      | chr18 | 12009885/C//A  | nonsynonymous | 0 | 2 |
| SMAD4      | chr18 | 48604747/C//A  | nonsynonymous | 0 | 2 |
| PSMD8      | chr19 | 38870015/C//A  | synonymous    | 0 | 2 |
| NOVA2      | chr19 | 46457136/C//A  | nonsynonymous | 0 | 2 |
| KLK9       | chr19 | 51506379/G//T  | synonymous    | 0 | 2 |
| RFPL4A     | chr19 | 56274381/G//T  | nonsynonymous | 0 | 2 |
| ANKEF1     | chr20 | 10019289/G//A  | nonsynonymous | 0 | 2 |
| PTPRT      | chr20 | 40980857/G//T  | nonsynonymous | 0 | 2 |
| KREMEN1    | chr22 | 29563029/C//A  | synonymous    | 0 | 2 |

|           |       |                |               |   |   |
|-----------|-------|----------------|---------------|---|---|
| NHS       | chrX  | 17745861/C//A  | nonsynonymous | 0 | 2 |
| KLHL34    | chrX  | 21674199/C//A  | nonsynonymous | 0 | 2 |
| ZNF630    | chrX  | 47918944/C//A  | nonsynonymous | 0 | 2 |
| TRO       | chrX  | 54950965/G//T  | nonsynonymous | 0 | 2 |
| CAPN6     | chrX  | 110489802/G//C | synonymous    | 0 | 2 |
| ARHGAP36  | chrX  | 130217867/G//T | nonsynonymous | 0 | 2 |
| DFFB      | chr1  | 3782394/G//T   | nonsynonymous | 0 | 2 |
| RSBN1     | chr1  | 114340278/C//T | nonsynonymous | 0 | 2 |
| FCRL4     | chr1  | 157556004/G//A | synonymous    | 0 | 2 |
| LHCGR     | chr2  | 48936162/C//A  | nonsynonymous | 0 | 2 |
| CSRNP3    | chr2  | 166451600/T//A | nonsynonymous | 0 | 2 |
| CRYBA2    | chr2  | 219857956/G//C | synonymous    | 0 | 2 |
| CRTAP     | chr3  | 33155928/AG//A | nonsynonymous | 0 | 2 |
| STAC      | chr3  | 36526485/G//A  | nonsynonymous | 0 | 2 |
| SCN5A     | chr3  | 38627529/G//A  | nonsynonymous | 0 | 2 |
| SLC6A20   | chr3  | 45801399/C//T  | nonsynonymous | 0 | 2 |
| SLC25A20  | chr3  | 48921494/C//A  | nonsynonymous | 0 | 2 |
| DOCK3     | chr3  | 51418495/T//A  | synonymous    | 0 | 2 |
| CPNE4     | chr3  | 131274365/G//A | synonymous    | 0 | 2 |
| SPSB4     | chr3  | 140785052/C//T | nonsynonymous | 0 | 2 |
| SST       | chr3  | 187387985/C//T | nonsynonymous | 0 | 2 |
| C5orf42   | chr5  | 37179461/A//T  | nonsynonymous | 0 | 2 |
| EGFLAM    | chr5  | 38463931/C//A  | synonymous    | 0 | 2 |
| APC       | chr5  | 112175225/G//T | nonsynonymous | 0 | 2 |
| PCDHA7    | chr5  | 140215350/C//T | nonsynonymous | 0 | 2 |
| PCDHB12   | chr5  | 140588661/C//T | nonsynonymous | 0 | 2 |
| GPX3      | chr5  | 150407628/C//T | synonymous    | 0 | 2 |
| CANX      | chr5  | 179155670/G//T | synonymous    | 0 | 2 |
| LY6G6F    | chr6  | 31675736/G//C  | synonymous    | 0 | 2 |
| DDX43     | chr6  | 74115486/C//T  | synonymous    | 0 | 2 |
| ALDH8A1   | chr6  | 135239564/C//T | nonsynonymous | 0 | 2 |
| PLEKHG1   | chr6  | 151161857/G//T | nonsynonymous | 0 | 2 |
| GCK       | chr7  | 44189585/C//G  | nonsynonymous | 0 | 2 |
| FBXO24    | chr7  | 100184248/C//T | synonymous    | 0 | 2 |
| KCNB2     | chr8  | 73848485/G//A  | nonsynonymous | 0 | 2 |
| TG        | chr8  | 133913768/C//T | nonsynonymous | 0 | 2 |
| MPDZ      | chr9  | 13168518/C//T  | nonsynonymous | 0 | 2 |
| DIRAS2    | chr9  | 93375521/C//T  | nonsynonymous | 0 | 2 |
| ZNF462    | chr9  | 109691168/G//A | nonsynonymous | 0 | 2 |
| GOLGA2    | chr9  | 131036249/C//G | nonsynonymous | 0 | 2 |
| SARDH     | chr9  | 136559447/C//T | synonymous    | 0 | 2 |
| BTG4      | chr11 | 111365969/C//T | nonsynonymous | 0 | 2 |
| CD163     | chr12 | 7639557/C//T   | synonymous    | 0 | 2 |
| TAS2R8    | chr12 | 10959334/C//G  | nonsynonymous | 0 | 2 |
| DBX2      | chr12 | 45444518/C//T  | nonsynonymous | 0 | 2 |
| MYL2      | chr12 | 111351058/C//A | nonsynonymous | 0 | 2 |
| TPTE2     | chr13 | 20041417/C//T  | nonsynonymous | 0 | 2 |
| MTUS2     | chr13 | 29598896/G//C  | nonsynonymous | 0 | 2 |
| MAGEL2    | chr15 | 23890185/G//A  | nonsynonymous | 0 | 2 |
| MPG       | chr16 | 129531/C//T    | synonymous    | 0 | 2 |
| LCAT      | chr16 | 67976345/C//T  | synonymous    | 0 | 2 |
| TP53      | chr17 | 7578535/T//C   | nonsynonymous | 0 | 2 |
| GIP       | chr17 | 47041769/C//A  | nonsynonymous | 0 | 2 |
| CACNA1G   | chr17 | 48668973/C//A  | nonsynonymous | 0 | 2 |
| USH1G     | chr17 | 72915647/G//A  | synonymous    | 0 | 2 |
| MAP2K2    | chr19 | 4099263/G//A   | synonymous    | 0 | 2 |
| XAB2      | chr19 | 7684695/T//C   | nonsynonymous | 0 | 2 |
| EPOR      | chr19 | 11494818/G//C  | synonymous    | 0 | 2 |
| NOTCH3    | chr19 | 15285145/C//T  | synonymous    | 0 | 2 |
| ZNF570    | chr19 | 37961269/C//T  | nonsynonymous | 0 | 2 |
| RYR1      | chr19 | 39063839/G//A  | nonsynonymous | 0 | 2 |
| CPT1C     | chr19 | 50209614/G//A  | synonymous    | 0 | 2 |
| ZSCAN1    | chr19 | 58565043/G//A  | nonsynonymous | 0 | 2 |
| ZCCHC3    | chr20 | 278982/G//T    | nonsynonymous | 0 | 2 |
| EPB41L1   | chr20 | 34773139/G//C  | nonsynonymous | 0 | 2 |
| CD40      | chr20 | 44751359/C//T  | nonsynonymous | 0 | 2 |
| TSHZ2     | chr20 | 51873021/G//A  | synonymous    | 0 | 2 |
| KRTAP19-5 | chr21 | 31874285/C//T  | nonsynonymous | 0 | 2 |
| KRTAP6-2  | chr21 | 31971054/C//T  | nonsynonymous | 0 | 2 |
| CECR1     | chr22 | 17690387/C//G  | nonsynonymous | 0 | 2 |

|            |       |                 |               |   |   |
|------------|-------|-----------------|---------------|---|---|
| CACNA11    | chr22 | 40038854/A/C    | nonsynonymous | 0 | 2 |
| LMF2       | chr22 | 50944532/C/A    | nonsynonymous | 0 | 2 |
| H2BFM      | chrX  | 103294635/C/T   | nonsynonymous | 0 | 2 |
| PNCK       | chrX  | 152936787/G/A   | synonymous    | 0 | 2 |
| NPPB       | chr1  | 11917717/G/T    | nonsynonymous | 0 | 2 |
| TMEM39B    | chr1  | 32538571/C/T    | synonymous    | 0 | 2 |
| FMN2       | chr1  | 240255446/G/A   | nonsynonymous | 0 | 2 |
| ZNF385D    | chr3  | 21706379/G/A    | nonsynonymous | 0 | 2 |
| NEK10      | chr3  | 27387643/G/A    | nonsynonymous | 0 | 2 |
| ITIH1      | chr3  | 52812362/G/A    | nonsynonymous | 0 | 2 |
| ROBO2      | chr3  | 77657067/G/A    | synonymous    | 0 | 2 |
| ARHGAP31   | chr3  | 119112351/A/G   | nonsynonymous | 0 | 2 |
| SENP5      | chr3  | 196612643/C/T   | synonymous    | 0 | 2 |
| ANKRD50    | chr4  | 125590912/G/A   | nonsynonymous | 0 | 2 |
| TENM3      | chr4  | 183721521/G/A   | synonymous    | 0 | 2 |
|            | chr5  | 133481490/T/G   | synonymous    | 0 | 2 |
| TIGD6      | chr5  | 149374780/C/A   | nonsynonymous | 0 | 2 |
| B3GAT2     | chr6  | 71666080/A/G    | nonsynonymous | 0 | 2 |
| PAPOLB     | chr7  | 4900392/G/A     | synonymous    | 0 | 2 |
| PCLO       | chr7  | 82784308/G/A    | nonsynonymous | 0 | 2 |
| DNAJC9-AS1 | chr10 | 75035372/G/A    | synonymous    | 0 | 2 |
| SLC18A2    | chr10 | 119013636/G/T   | nonsynonymous | 0 | 2 |
| TENM4      | chr11 | 78423573/G/A    | synonymous    | 0 | 2 |
| CNTN5      | chr11 | 100141892/G/T   | nonsynonymous | 0 | 2 |
| USP5       | chr12 | 6961398/C/T     | nonsynonymous | 0 | 2 |
| HECTD4     | chr12 | 112648043/C/T   | nonsynonymous | 0 | 2 |
| FES        | chr15 | 91434372/C/T    | nonsynonymous | 0 | 2 |
| ZNF763     | chr19 | 12089064/T/A    | nonsynonymous | 0 | 2 |
| CRX        | chr19 | 48337694/G/A    | synonymous    | 0 | 2 |
| LAIR2      | chr19 | 55019407/C/T    | synonymous    | 0 | 2 |
| ZNF579     | chr19 | 56090487/C/T    | synonymous    | 0 | 2 |
| BPIFB3     | chr20 | 31643311/G/A    | nonsynonymous | 0 | 2 |
| UPRT       | chrX  | 74494248/G/A    | synonymous    | 0 | 2 |
| NRK        | chrX  | 105132350/A/C   | nonsynonymous | 0 | 2 |
| PRDM16     | chr1  | 3342162/G/A     | nonsynonymous | 0 | 2 |
| TRIM63     | chr1  | 26385013/C/T    | synonymous    | 0 | 2 |
| NPR1       | chr1  | 153659739/G/A   | nonsynonymous | 0 | 2 |
| LRRCS2     | chr1  | 165532779/G/A   | synonymous    | 0 | 2 |
| NMNAT2     | chr1  | 183253859/C/T   | nonsynonymous | 0 | 2 |
| ESRRG      | chr1  | 216741434/C/T   | nonsynonymous | 0 | 2 |
| WDCP       | chr2  | 24262278/G/A    | synonymous    | 0 | 2 |
| SP140L     | chr2  | 231264940/A/G   | synonymous    | 0 | 2 |
| COL6A3     | chr2  | 238233365/C/T   | synonymous    | 0 | 2 |
| MSL2       | chr3  | 135870832/A/T   | synonymous    | 0 | 2 |
| VWA5B2     | chr3  | 183951436/G/A   | synonymous    | 0 | 2 |
| SLIT2      | chr4  | 20512691/A/G    | nonsynonymous | 0 | 2 |
| CCKAR      | chr4  | 26483527/G/A    | synonymous    | 0 | 2 |
| FRYL       | chr4  | 48566035/G/A    | nonsynonymous | 0 | 2 |
| RAPGEF2    | chr4  | 160274738/C/T   | synonymous    | 0 | 2 |
| TERT       | chr5  | 1293801/G/A     | synonymous    | 0 | 2 |
| APC        | chr5  | 112154999/C/T   | nonsynonymous | 0 | 2 |
| APC        | chr5  | 112175562/C/A/C | nonsynonymous | 0 | 2 |
| NRG2       | chr5  | 139260516/C/T   | nonsynonymous | 0 | 2 |
| PCDHB5     | chr5  | 140515710/G/A   | nonsynonymous | 0 | 2 |
| PCDHB9     | chr5  | 140569047/C/T   | nonsynonymous | 0 | 2 |
| PCDHB10    | chr5  | 140574287/C/T   | nonsynonymous | 0 | 2 |
| SAYSD1     | chr6  | 39073378/G/A    | synonymous    | 0 | 2 |
| NCR2       | chr6  | 41303906/C/T    | nonsynonymous | 0 | 2 |
| GRIK2      | chr6  | 102337558/G/T   | nonsynonymous | 0 | 2 |
|            | chr6  | 133789885/C/T   | synonymous    | 0 | 2 |
| EPM2A      | chr6  | 145948724/G/A   | nonsynonymous | 0 | 2 |
| LPA        | chr6  | 160977156/C/T   | nonsynonymous | 0 | 2 |
| TCTE3      | chr6  | 170151581/C/T   | synonymous    | 0 | 2 |
| CYP2W1     | chr7  | 1024867/G/A     | nonsynonymous | 0 | 2 |
| RELN       | chr7  | 103180687/G/A   | nonsynonymous | 0 | 2 |
| PIK3CG     | chr7  | 106509049/G/C   | nonsynonymous | 0 | 2 |
| CTTNBP2    | chr7  | 117431644/G/A   | nonsynonymous | 0 | 2 |
| GRM8       | chr7  | 126173252/C/T   | synonymous    | 0 | 2 |
| NEFM       | chr8  | 24773204/C/T    | synonymous    | 0 | 2 |
| HGSNAT     | chr8  | 43052992/G/A    | synonymous    | 0 | 2 |

|          |       |                   |               |   |   |
|----------|-------|-------------------|---------------|---|---|
| CHD7     | chr8  | 61654747/G//A     | synonymous    | 0 | 2 |
| SLA      | chr8  | 134052256/T//C    | nonsynonymous | 0 | 2 |
| FAM205A  | chr9  | 34726953/C//T     | nonsynonymous | 0 | 2 |
| NOL8     | chr9  | 95085779/G//A     | nonsynonymous | 0 | 2 |
| TNC      | chr9  | 117848697/C//T    | nonsynonymous | 0 | 2 |
| CUBN     | chr10 | 16970240/G//A     | nonsynonymous | 0 | 2 |
| RASGEF1A | chr10 | 43692431/G//A     | synonymous    | 0 | 2 |
| PLCE1    | chr10 | 95791314/G//A     | nonsynonymous | 0 | 2 |
| STX3     | chr11 | 59560901/C//T     | nonsynonymous | 0 | 2 |
| CHD4     | chr12 | 6682343/G//A      | synonymous    | 0 | 2 |
| KRT84    | chr12 | 52772163/G//A     | synonymous    | 0 | 2 |
| TMTC2    | chr12 | 83358846/C//T     | nonsynonymous | 0 | 2 |
| CDK8     | chr13 | 26828860/G//C     | nonsynonymous | 0 | 2 |
| MAP1A    | chr15 | 43819399/C//T     | nonsynonymous | 0 | 2 |
| HDC      | chr15 | 50546832/G//A     | synonymous    | 0 | 2 |
| WDR72    | chr15 | 53994411/A//G     | nonsynonymous | 0 | 2 |
| PLEKHO2  | chr15 | 65157119/G//A     | nonsynonymous | 0 | 2 |
| TLE3     | chr15 | 70344749/C//T     | nonsynonymous | 0 | 2 |
| KIF7     | chr15 | 90190181/G//T     | synonymous    | 0 | 2 |
| WWP2     | chr16 | 69971024/GCTGA//G | nonsynonymous | 0 | 2 |
| CA5A     | chr16 | 87960471/C//T     | nonsynonymous | 0 | 2 |
| TUBB3    | chr16 | 90002107/C//T     | synonymous    | 0 | 2 |
| ZNF232   | chr17 | 5012922/C//T      | nonsynonymous | 0 | 2 |
| KRT28    | chr17 | 38948719/T//A     | nonsynonymous | 0 | 2 |
| DNAH17   | chr17 | 76435185/C//A     | nonsynonymous | 0 | 2 |
| LOXHD1   | chr18 | 44140257/G//A     | synonymous    | 0 | 2 |
| OR7E24   | chr19 | 9361848/G//A      | synonymous    | 0 | 2 |
| ZNF208   | chr19 | 22154545/G//T     | synonymous    | 0 | 2 |
| ZNF541   | chr19 | 48041483/G//T     | synonymous    | 0 | 2 |
| SLC23A2  | chr20 | 4864370/T//A      | nonsynonymous | 0 | 2 |
| RALGAPA2 | chr20 | 20620458/G//A     | nonsynonymous | 0 | 2 |
| BRWD1    | chr21 | 40559209/T//C     | nonsynonymous | 0 | 2 |
| PHKA2    | chrX  | 18938299/G//A     | nonsynonymous | 0 | 2 |
| KDM6A    | chrX  | 44949182/T//G     | synonymous    | 0 | 2 |
| AR       | chrX  | 66905872/G//A     | nonsynonymous | 0 | 2 |
| P2RY4    | chrX  | 69478701/G//A     | synonymous    | 0 | 2 |
| TEX13C   | chrX  | 124454052/C//T    | synonymous    | 0 | 2 |
| FMR1     | chrX  | 147011514/C//G    | nonsynonymous | 0 | 2 |
| FLNC     | chr7  | 128486357/G//A    | nonsynonymous | 1 | 1 |
| SLC6A11  | chr3  | 10857946/C//T     | synonymous    | 2 | 0 |
| WASHC2C  | chr10 | 46242094/A//G     | nonsynonymous | 1 | 1 |
| PLOD1    | chr1  | 12030739/C//T     | nonsynonymous | 0 | 2 |
| CELA2A   | chr1  | 15793875/C//T     | synonymous    | 0 | 2 |
| DDI2     | chr1  | 15978313/G//C     | nonsynonymous | 0 | 2 |
| FCN3     | chr1  | 27700948/G//A     | synonymous    | 0 | 2 |
| TXLNA    | chr1  | 32659717/C//T     | nonsynonymous | 0 | 2 |
| YARS     | chr1  | 33246687/G//A     | synonymous    | 0 | 2 |
| RPS8     | chr1  | 45243669/C//T     | synonymous    | 0 | 2 |
| ACOT11   | chr1  | 55051557/C//T     | synonymous    | 0 | 2 |
| TTC4     | chr1  | 55183239/T//C     | nonsynonymous | 0 | 2 |
| C8A      | chr1  | 57341830/G//A     | nonsynonymous | 0 | 2 |
| LRI2     | chr1  | 113637023/C//T    | nonsynonymous | 0 | 2 |
| ADAM30   | chr1  | 120438227/G//C    | nonsynonymous | 0 | 2 |
| TDRKH    | chr1  | 151749074/G//A    | synonymous    | 0 | 2 |
| S100A7L2 | chr1  | 153409544/C//T    | nonsynonymous | 0 | 2 |
| INSRR    | chr1  | 156815042/C//T    | nonsynonymous | 0 | 2 |
| NTRK1    | chr1  | 156834566/C//T    | nonsynonymous | 0 | 2 |
| FCRL5    | chr1  | 157514748/G//A    | synonymous    | 0 | 2 |
| CD1E     | chr1  | 158325189/G//A    | nonsynonymous | 0 | 2 |
| OR6Y1    | chr1  | 158516941/C//T    | nonsynonymous | 0 | 2 |
| OR10Z1   | chr1  | 158576671/C//T    | nonsynonymous | 0 | 2 |
| OR6K6    | chr1  | 158724968/C//T    | synonymous    | 0 | 2 |
| FCER1A   | chr1  | 159275991/A//C    | nonsynonymous | 0 | 2 |
| LMX1A    | chr1  | 165175156/G//A    | synonymous    | 0 | 2 |
| ADCY10   | chr1  | 167815028/C//T    | nonsynonymous | 0 | 2 |
| MROH9    | chr1  | 170967498/C//T    | nonsynonymous | 0 | 2 |
| PRRC2C   | chr1  | 171492426/T//C    | synonymous    | 0 | 2 |
| SLC9C2   | chr1  | 173523914/C//T    | nonsynonymous | 0 | 2 |
| BRINP2   | chr1  | 177247892/C//T    | synonymous    | 0 | 2 |
| TDRD5    | chr1  | 179660070/G//A    | nonsynonymous | 0 | 2 |



|          |      |                |               |   |   |
|----------|------|----------------|---------------|---|---|
| CR2      | chr1 | 207646175/A//G | synonymous    | 0 | 2 |
| CR2      | chr1 | 207651288/G//A | synonymous    | 0 | 2 |
| DIEXF    | chr1 | 210010361/C//T | synonymous    | 0 | 2 |
| NSL1     | chr1 | 212957795/G//A | synonymous    | 0 | 2 |
| USH2A    | chr1 | 215848027/G//A | nonsynonymous | 0 | 2 |
| DUSP10   | chr1 | 221879780/A//C | nonsynonymous | 0 | 2 |
| PRSS38   | chr1 | 228003916/G//A | nonsynonymous | 0 | 2 |
| OBSCN    | chr1 | 228432252/C//T | nonsynonymous | 0 | 2 |
| RGS7     | chr1 | 240979701/T//G | nonsynonymous | 0 | 2 |
| OR2T34   | chr1 | 248737333/G//A | synonymous    | 0 | 2 |
| ATP6V1C2 | chr2 | 10866679/G//A  | nonsynonymous | 0 | 2 |
| PLEK     | chr2 | 68622942/G//A  | synonymous    | 0 | 2 |
| VWA3B    | chr2 | 98804433/C//T  | synonymous    | 0 | 2 |
| RGPD4    | chr2 | 108496546/C//T | nonsynonymous | 0 | 2 |
| ANAPC1   | chr2 | 112621472/C//T | nonsynonymous | 0 | 2 |
| TMEM185B | chr2 | 120980377/G//A | nonsynonymous | 0 | 2 |
| SCN7A    | chr2 | 167288867/C//T | synonymous    | 0 | 2 |
| NOSTRIN  | chr2 | 169659163/G//A | nonsynonymous | 0 | 2 |
| DNAH7    | chr2 | 196753005/C//T | nonsynonymous | 0 | 2 |
| ZFAND2B  | chr2 | 220072755/G//A | synonymous    | 0 | 2 |
| IL17RE   | chr3 | 9948451/C//T   | nonsynonymous | 0 | 2 |
| IRAK2    | chr3 | 10251277/C//T  | synonymous    | 0 | 2 |
| WDR48    | chr3 | 39093488/G//A  | synonymous    | 0 | 2 |
| BSN      | chr3 | 49690076/C//T  | synonymous    | 0 | 2 |
| DNAH12   | chr3 | 57494116/C//T  | nonsynonymous | 0 | 2 |
| VGLL3    | chr3 | 86996222/A//G  | synonymous    | 0 | 2 |
| PARP14   | chr3 | 122422678/G//A | synonymous    | 0 | 2 |
| DNAJC13  | chr3 | 132247132/A//G | nonsynonymous | 0 | 2 |
| TMEM108  | chr3 | 133099017/C//T | synonymous    | 0 | 2 |
| IGSF10   | chr3 | 151160889/T//A | nonsynonymous | 0 | 2 |
| ATP11B   | chr3 | 182559881/C//T | synonymous    | 0 | 2 |
| P3H2     | chr3 | 189681803/C//T | nonsynonymous | 0 | 2 |
| DRD5     | chr4 | 9784373/C//T   | synonymous    | 0 | 2 |
| BST1     | chr4 | 15716934/C//T  | synonymous    | 0 | 2 |
| KDR      | chr4 | 55973929/C//T  | nonsynonymous | 0 | 2 |
| PDCL2    | chr4 | 56435957/C//T  | nonsynonymous | 0 | 2 |
| DMP1     | chr4 | 88584536/G//A  | synonymous    | 0 | 2 |
| STPG2    | chr4 | 98902463/A//T  | nonsynonymous | 0 | 2 |
| FSTL5    | chr4 | 162459390/T//C | nonsynonymous | 0 | 2 |
| GLRA3    | chr4 | 175649825/G//A | nonsynonymous | 0 | 2 |
| FAT1     | chr4 | 187629251/T//C | synonymous    | 0 | 2 |
| ZFP42    | chr4 | 188924097/G//A | nonsynonymous | 0 | 2 |
| UGT3A2   | chr5 | 36064457/G//A  | synonymous    | 0 | 2 |
| EGFLAM   | chr5 | 38370519/G//A  | nonsynonymous | 0 | 2 |
| CMYA5    | chr5 | 79031244/C//T  | nonsynonymous | 0 | 2 |
| SLC27A6  | chr5 | 128302184/C//T | synonymous    | 0 | 2 |
| PSD2     | chr5 | 139189152/C//T | nonsynonymous | 0 | 2 |
| PCDHA8   | chr5 | 140223200/C//T | nonsynonymous | 0 | 2 |
| PCDHA9   | chr5 | 140228065/A//C | synonymous    | 0 | 2 |
| PCDHA13  | chr5 | 140264182/C//T | nonsynonymous | 0 | 2 |
| TTC1     | chr5 | 159437572/G//T | nonsynonymous | 0 | 2 |
| GRM6     | chr5 | 178410162/C//T | nonsynonymous | 0 | 2 |
| F13A1    | chr6 | 6305779/A//G   | synonymous    | 0 | 2 |
| OR2B6    | chr6 | 27925444/C//T  | synonymous    | 0 | 2 |
| EHMT2    | chr6 | 31855418/G//A  | synonymous    | 0 | 2 |
| TREM1    | chr6 | 41250262/G//A  | nonsynonymous | 0 | 2 |
| AARS2    | chr6 | 44272217/A//C  | nonsynonymous | 0 | 2 |
| ENPP4    | chr6 | 46108786/C//T  | synonymous    | 0 | 2 |
| DST      | chr6 | 56392425/G//A  | nonsynonymous | 0 | 2 |
| DST      | chr6 | 56498960/A//T  | synonymous    | 0 | 2 |
| COL9A1   | chr6 | 71012677/T//C  | synonymous    | 0 | 2 |
| SMAP1    | chr6 | 71571319/C//T  | synonymous    | 0 | 2 |
| RFX6     | chr6 | 117237395/G//A | nonsynonymous | 0 | 2 |
| RFX6     | chr6 | 117237412/C//T | nonsynonymous | 0 | 2 |
| DAGLB    | chr7 | 6461373/G//A   | synonymous    | 0 | 2 |
| ABCA13   | chr7 | 48556372/G//C  | synonymous    | 0 | 2 |
| SEPT14   | chr7 | 55914232/G//A  | synonymous    | 0 | 2 |
| ZNF117   | chr7 | 64439855/G//A  | nonsynonymous | 0 | 2 |
| TPST1    | chr7 | 65706034/T//C  | nonsynonymous | 0 | 2 |
| SEMA3E   | chr7 | 82996945/T//C  | nonsynonymous | 0 | 2 |

|              |       |                |               |   |   |
|--------------|-------|----------------|---------------|---|---|
| SEMA3E       | chr7  | 83021865/T//G  | synonymous    | 0 | 2 |
| ARPC1B       | chr7  | 98992093/A//G  | nonsynonymous | 0 | 2 |
| ZNF394       | chr7  | 99097557/G//A  | nonsynonymous | 0 | 2 |
| MBLAC1       | chr7  | 99725234/G//A  | synonymous    | 0 | 2 |
| PVRIG        | chr7  | 99818738/G//A  | nonsynonymous | 0 | 2 |
| MUC17        | chr7  | 100676134/C//T | synonymous    | 0 | 2 |
| MUC17        | chr7  | 100682015/A//G | nonsynonymous | 0 | 2 |
| RELN         | chr7  | 103130334/G//A | synonymous    | 0 | 2 |
| LAMB4        | chr7  | 107718723/G//A | synonymous    | 0 | 2 |
| C7orf66      | chr7  | 108524089/G//A | nonsynonymous | 0 | 2 |
| KIAA1549     | chr7  | 138583795/G//A | synonymous    | 0 | 2 |
| KIAA1147     | chr7  | 141385412/G//A | synonymous    | 0 | 2 |
| MGAM         | chr7  | 141724956/G//A | synonymous    | 0 | 2 |
| MGAM         | chr7  | 141764301/C//T | nonsynonymous | 0 | 2 |
| PRSS1        | chr7  | 142459658/C//T | synonymous    | 0 | 2 |
| EPHB6        | chr7  | 142568774/G//A | synonymous    | 0 | 2 |
| NOBOX        | chr7  | 144094550/C//T | nonsynonymous | 0 | 2 |
| SLC4A2       | chr7  | 150772569/C//T | nonsynonymous | 0 | 2 |
| PTPRN2       | chr7  | 157959649/G//A | nonsynonymous | 0 | 2 |
| CSGALNACT1   | chr8  | 19277882/G//A  | synonymous    | 0 | 2 |
| GSR          | chr8  | 30538543/G//A  | nonsynonymous | 0 | 2 |
| TEX15        | chr8  | 30706440/G//A  | nonsynonymous | 0 | 2 |
| CHD7         | chr8  | 61778369/T//G  | nonsynonymous | 0 | 2 |
| TRPA1        | chr8  | 72935049/C//T  | synonymous    | 0 | 2 |
| KCNB2        | chr8  | 73480497/G//A  | synonymous    | 0 | 2 |
| MATN2        | chr8  | 99047886/A//T  | nonsynonymous | 0 | 2 |
| EFR3A        | chr8  | 132982763/T//C | synonymous    | 0 | 2 |
| SLC45A4      | chr8  | 142227249/C//T | nonsynonymous | 0 | 2 |
| LYPD2        | chr8  | 143831696/G//A | synonymous    | 0 | 2 |
| ZC3H3        | chr8  | 144557752/G//A | synonymous    | 0 | 2 |
| GLIS3        | chr9  | 4117797/G//A   | nonsynonymous | 0 | 2 |
| TYRP1        | chr9  | 12694104/G//A  | synonymous    | 0 | 2 |
| TTC39B       | chr9  | 15171991/G//A  | synonymous    | 0 | 2 |
| DDX58        | chr9  | 32488094/T//C  | nonsynonymous | 0 | 2 |
| APTX         | chr9  | 33001630/G//A  | synonymous    | 0 | 2 |
| SPATA31A6    | chr9  | 43627602/G//A  | nonsynonymous | 0 | 2 |
| GDA          | chr9  | 74865725/C//T  | synonymous    | 0 | 2 |
| CYLC2        | chr9  | 105765505/G//T | nonsynonymous | 0 | 2 |
| ABCA1        | chr9  | 107576392/A//C | synonymous    | 0 | 2 |
| SVEP1        | chr9  | 113168989/G//A | nonsynonymous | 0 | 2 |
| PAPPA        | chr9  | 119065135/G//A | nonsynonymous | 0 | 2 |
| STRBP        | chr9  | 125932183/C//T | nonsynonymous | 0 | 2 |
| USP20        | chr9  | 132640649/G//A | synonymous    | 0 | 2 |
| SLC39A12-AS1 | chr10 | 18291941/C//T  | synonymous    | 0 | 2 |
| GAD2         | chr10 | 26575294/C//T  | synonymous    | 0 | 2 |
| ANK3         | chr10 | 61835456/G//A  | nonsynonymous | 0 | 2 |
| CYP2C8       | chr10 | 96796764/G//A  | synonymous    | 0 | 2 |
| CYP2C8       | chr10 | 96827385/G//A  | nonsynonymous | 0 | 2 |
| ADGRA1       | chr10 | 134942208/C//G | synonymous    | 0 | 2 |
| MUC5B        | chr11 | 1264836/C//T   | synonymous    | 0 | 2 |
| OR52R1       | chr11 | 4824767/G//T   | nonsynonymous | 0 | 2 |
| OR51A4       | chr11 | 4968294/T//A   | nonsynonymous | 0 | 2 |
| OR51M1       | chr11 | 5410987/C//T   | nonsynonymous | 0 | 2 |
| OR51I2       | chr11 | 5475487/G//A   | nonsynonymous | 0 | 2 |
| OR56B4       | chr11 | 6129689/C//T   | synonymous    | 0 | 2 |
| OVCH2        | chr11 | 7718250/A//C   | synonymous    | 0 | 2 |
| OR5P2        | chr11 | 7818388/G//A   | synonymous    | 0 | 2 |
| ANO3         | chr11 | 26663444/T//C  | synonymous    | 0 | 2 |
| OR5L1        | chr11 | 55579670/C//T  | nonsynonymous | 0 | 2 |
| OR10AG1      | chr11 | 55735873/A//T  | nonsynonymous | 0 | 2 |
| OR5T2        | chr11 | 56000410/C//T  | synonymous    | 0 | 2 |
| OR8H1        | chr11 | 56057866/G//A  | synonymous    | 0 | 2 |
| DNAJB13      | chr11 | 73670586/G//A  | nonsynonymous | 0 | 2 |
| GRM5         | chr11 | 88301131/G//A  | nonsynonymous | 0 | 2 |
| CNTN5        | chr11 | 100211289/G//A | nonsynonymous | 0 | 2 |
| TBRG1        | chr11 | 124495721/A//T | nonsynonymous | 0 | 2 |
| ROBO4        | chr11 | 124763877/C//T | synonymous    | 0 | 2 |
| ETS1         | chr11 | 128359363/G//A | synonymous    | 0 | 2 |
| DDX11        | chr12 | 31254840/C//T  | nonsynonymous | 0 | 2 |
| LRRK2        | chr12 | 40668707/A//T  | nonsynonymous | 0 | 2 |

|           |       |                |               |   |   |
|-----------|-------|----------------|---------------|---|---|
| MCRS1     | chr12 | 49953259/G//A  | nonsynonymous | 0 | 2 |
| NCKAP1L   | chr12 | 54920357/C//T  | synonymous    | 0 | 2 |
| OR6C6     | chr12 | 55688931/A//G  | nonsynonymous | 0 | 2 |
|           | chr12 | 56708420/A//G  | synonymous    | 0 | 2 |
| EEA1      | chr12 | 93181662/G//A  | nonsynonymous | 0 | 2 |
| HCFC2     | chr12 | 104480655/T//A | nonsynonymous | 0 | 2 |
| SCARB1    | chr12 | 125292481/G//A | synonymous    | 0 | 2 |
| TMEM132B  | chr12 | 126138713/G//A | synonymous    | 0 | 2 |
| SACS      | chr13 | 23911792/G//A  | nonsynonymous | 0 | 2 |
| RNF17     | chr13 | 25406036/G//A  | nonsynonymous | 0 | 2 |
| MTUS2     | chr13 | 29933467/G//A  | nonsynonymous | 0 | 2 |
| КТN1      | chr14 | 56107845/T//G  | nonsynonymous | 0 | 2 |
|           | chr14 | 76071894/A//G  | synonymous    | 0 | 2 |
| OR4M2     | chr15 | 22368699/A//T  | nonsynonymous | 0 | 2 |
| NPAP1     | chr15 | 24922085/C//T  | synonymous    | 0 | 2 |
| NPAP1     | chr15 | 24924372/C//T  | nonsynonymous | 0 | 2 |
| KNL1      | chr15 | 40954376/T//C  | nonsynonymous | 0 | 2 |
| SLC30A4   | chr15 | 45814199/G//A  | synonymous    | 0 | 2 |
| CTXN2     | chr15 | 48493546/G//A  | nonsynonymous | 0 | 2 |
| MYO9A     | chr15 | 72189834/G//A  | synonymous    | 0 | 2 |
| CSPG4     | chr15 | 75979765/G//A  | nonsynonymous | 0 | 2 |
| CTSH      | chr15 | 79221748/A//T  | synonymous    | 0 | 2 |
| BNC1      | chr15 | 83926716/G//A  | synonymous    | 0 | 2 |
| OR4F15    | chr15 | 102359249/A//G | nonsynonymous | 0 | 2 |
| TPSD1     | chr16 | 1306582/C//T   | nonsynonymous | 0 | 2 |
| MMP25     | chr16 | 3100312/G//A   | nonsynonymous | 0 | 2 |
| ZNF597    | chr16 | 3493192/G//A   | synonymous    | 0 | 2 |
| MVP       | chr16 | 29859246/C//T  | nonsynonymous | 0 | 2 |
| ALDOA     | chr16 | 30080264/A//T  | nonsynonymous | 0 | 2 |
| ITGAM     | chr16 | 31336577/C//T  | synonymous    | 0 | 2 |
| ZNF469    | chr16 | 88497964/C//T  | synonymous    | 0 | 2 |
| ASGR1     | chr17 | 7077599/C//T   | nonsynonymous | 0 | 2 |
| NEURL4    | chr17 | 7226074/G//A   | nonsynonymous | 0 | 2 |
| ALOX15B   | chr17 | 7951863/G//A   | nonsynonymous | 0 | 2 |
| MYH2      | chr17 | 10428353/G//A  | synonymous    | 0 | 2 |
| DNAH9     | chr17 | 11513830/G//A  | synonymous    | 0 | 2 |
| KRT16     | chr17 | 39768746/C//T  | synonymous    | 0 | 2 |
| AOC3      | chr17 | 41004692/C//T  | synonymous    | 0 | 2 |
| XYLT2     | chr17 | 48435893/T//G  | nonsynonymous | 0 | 2 |
| TANC2     | chr17 | 61497576/C//T  | synonymous    | 0 | 2 |
| FAM20A    | chr17 | 66538840/G//A  | nonsynonymous | 0 | 2 |
| RNF213    | chr17 | 78333911/C//T  | nonsynonymous | 0 | 2 |
| SLC14A2   | chr18 | 43212350/G//A  | nonsynonymous | 0 | 2 |
| MYO5B     | chr18 | 47429135/G//A  | synonymous    | 0 | 2 |
| DOK6      | chr18 | 67266712/G//A  | synonymous    | 0 | 2 |
| RТТN      | chr18 | 67721486/G//A  | nonsynonymous | 0 | 2 |
| MED16     | chr19 | 873547/C//A    | nonsynonymous | 0 | 2 |
| TMIGD2    | chr19 | 4292675/G//A   | nonsynonymous | 0 | 2 |
| MUC16     | chr19 | 9046491/C//T   | nonsynonymous | 0 | 2 |
| MUC16     | chr19 | 9088160/G//A   | nonsynonymous | 0 | 2 |
| OR7D4     | chr19 | 9324972/G//A   | nonsynonymous | 0 | 2 |
| ZNF846    | chr19 | 9868788/G//A   | nonsynonymous | 0 | 2 |
| CLEC17A   | chr19 | 14707698/C//T  | synonymous    | 0 | 2 |
| OR7C1     | chr19 | 14910425/G//A  | nonsynonymous | 0 | 2 |
| OR10H2    | chr19 | 15839661/G//A  | nonsynonymous | 0 | 2 |
| OR10H1    | chr19 | 15918812/G//A  | synonymous    | 0 | 2 |
| LRP3      | chr19 | 33696243/C//T  | synonymous    | 0 | 2 |
| FFAR2     | chr19 | 35941507/C//T  | synonymous    | 0 | 2 |
| WDR87     | chr19 | 38379457/C//T  | synonymous    | 0 | 2 |
| CAPN12    | chr19 | 39221478/C//T  | synonymous    | 0 | 2 |
| LGALS13   | chr19 | 40095971/C//T  | synonymous    | 0 | 2 |
| FCGBP     | chr19 | 40434171/C//T  | nonsynonymous | 0 | 2 |
| PSG4      | chr19 | 43699196/C//T  | synonymous    | 0 | 2 |
| PSG9      | chr19 | 43762387/C//T  | nonsynonymous | 0 | 2 |
| CEACAM16  | chr19 | 45206647/C//T  | synonymous    | 0 | 2 |
| EXOC3L2   | chr19 | 45719460/G//A  | synonymous    | 0 | 2 |
| FBXO46    | chr19 | 46215810/G//A  | nonsynonymous | 0 | 2 |
| FAM90A27P | chr19 | 53787293/G//A  | synonymous    | 0 | 2 |
| KIR3DL3   | chr19 | 55237674/T//A  | nonsynonymous | 0 | 2 |
| KIR3DL1   | chr19 | 55329873/C//T  | synonymous    | 0 | 2 |

|           |       |                |               |   |   |
|-----------|-------|----------------|---------------|---|---|
| NLRP2     | chr19 | 55505734/C//T  | nonsynonymous | 0 | 2 |
| GP6       | chr19 | 55526472/G//A  | synonymous    | 0 | 2 |
| NLRP8     | chr19 | 56466035/A//T  | nonsynonymous | 0 | 2 |
| USP29     | chr19 | 57641979/C//T  | nonsynonymous | 0 | 2 |
| VPS16     | chr20 | 2842528/T//A   | nonsynonymous | 0 | 2 |
| FERMT1    | chr20 | 6096576/G//A   | synonymous    | 0 | 2 |
| DNMT3B    | chr20 | 31388691/C//G  | nonsynonymous | 0 | 2 |
| PTPRT     | chr20 | 40747110/C//T  | nonsynonymous | 0 | 2 |
| PTPN1     | chr20 | 49195089/G//A  | nonsynonymous | 0 | 2 |
| CRYAA     | chr21 | 44590630/C//T  | nonsynonymous | 0 | 2 |
| KRTAP12-4 | chr21 | 46074209/G//A  | nonsynonymous | 0 | 2 |
| SEPT5     | chr22 | 19709259/G//A  | nonsynonymous | 0 | 2 |
| UPB1      | chr22 | 24916348/C//T  | synonymous    | 0 | 2 |
| MYO18B    | chr22 | 26317274/G//A  | synonymous    | 0 | 2 |
| PRR14L    | chr22 | 32113223/C//T  | nonsynonymous | 0 | 2 |
| TST       | chr22 | 37414406/G//A  | nonsynonymous | 0 | 2 |
| SMC1B     | chr22 | 45757774/C//T  | nonsynonymous | 0 | 2 |
| ZBED1     | chrX  | 2408110/G//A   | synonymous    | 0 | 2 |
| MXRA5     | chrX  | 3228960/C//T   | synonymous    | 0 | 2 |
| DCAF8L1   | chrX  | 27998321/C//T  | synonymous    | 0 | 2 |
| ZNF81     | chrX  | 47755298/C//T  | nonsynonymous | 0 | 2 |
| IQSEC2    | chrX  | 53264116/T//A  | nonsynonymous | 0 | 2 |
| PAGE5     | chrX  | 55246990/G//A  | synonymous    | 0 | 2 |
| FAAH2     | chrX  | 57515301/C//T  | nonsynonymous | 0 | 2 |
| MUM1L1    | chrX  | 105450995/G//A | nonsynonymous | 0 | 2 |
| AMMECR1   | chrX  | 109507750/A//T | nonsynonymous | 0 | 2 |
| TRPC5     | chrX  | 111195560/G//A | nonsynonymous | 0 | 2 |
| TENM1     | chrX  | 123518300/C//T | nonsynonymous | 0 | 2 |
| TENM1     | chrX  | 123785942/C//T | synonymous    | 0 | 2 |
| MAGEC1    | chrX  | 140996446/G//A | nonsynonymous | 0 | 2 |
| MAGEC2    | chrX  | 141290979/G//A | synonymous    | 0 | 2 |
| F8        | chrX  | 154194921/C//T | nonsynonymous | 0 | 2 |
| NLGN4Y    | chrY  | 16952902/G//A  | synonymous    | 0 | 2 |
| CDC27     | chr17 | 45214631/G//A  | synonymous    | 0 | 2 |
| CDC27     | chr17 | 45214673/T//C  | synonymous    | 0 | 2 |
| PEX10     | chr1  | 2338163/G//A   | nonsynonymous | 0 | 2 |
| AGO4      | chr1  | 36307291/T//A  | synonymous    | 0 | 2 |
| FSIP2     | chr2  | 186658896/C//T | nonsynonymous | 0 | 2 |
| BTN2A2    | chr6  | 26385354/G//A  | nonsynonymous | 0 | 2 |
| FGD2      | chr6  | 36990047/G//A  | synonymous    | 0 | 2 |
| TNS3      | chr7  | 47409208/C//T  | synonymous    | 0 | 2 |
| WBSCR17   | chr7  | 70853335/G//A  | synonymous    | 0 | 2 |
| ASB15     | chr7  | 123269051/A//G | nonsynonymous | 0 | 2 |
| FLNC      | chr7  | 128491632/G//A | nonsynonymous | 0 | 2 |
| DPYS      | chr8  | 105441779/A//C | nonsynonymous | 0 | 2 |
| SAXO1     | chr9  | 18928165/G//A  | nonsynonymous | 0 | 2 |
| TRIM14    | chr9  | 100857203/C//T | nonsynonymous | 0 | 2 |
| ANXA11    | chr10 | 81928742/C//T  | nonsynonymous | 0 | 2 |
| ENO4      | chr10 | 118641155/C//T | nonsynonymous | 0 | 2 |
| RBMXL2    | chr11 | 7110934/C//T   | nonsynonymous | 0 | 2 |
| MYBPC3    | chr11 | 47364678/G//A  | synonymous    | 0 | 2 |
| POU6F1    | chr12 | 51590663/G//C  | synonymous    | 0 | 2 |
| TMBIM4    | chr12 | 66539639/A//G  | nonsynonymous | 0 | 2 |
| SLC10A2   | chr13 | 103710740/G//T | synonymous    | 0 | 2 |
| RASA3     | chr13 | 114793321/G//T | nonsynonymous | 0 | 2 |
| HEATR4    | chr14 | 73989454/C//T  | nonsynonymous | 0 | 2 |
| FAM161B   | chr14 | 74404384/G//A  | nonsynonymous | 0 | 2 |
| TP53      | chr17 | 7578526/C//A   | nonsynonymous | 0 | 2 |
| MKS1      | chr17 | 56283396/C//T  | synonymous    | 0 | 2 |
| RNF157    | chr17 | 74157998/C//T  | nonsynonymous | 0 | 2 |
| SPPL2B    | chr19 | 2343274/G//A   | nonsynonymous | 0 | 2 |
| CAMSAP3   | chr19 | 7676731/C//T   | nonsynonymous | 0 | 2 |
| CCL25     | chr19 | 8121335/C//T   | nonsynonymous | 0 | 2 |
| HAS1      | chr19 | 52220435/C//T  | synonymous    | 0 | 2 |
| CST5      | chr20 | 23856749/C//A  | synonymous    | 0 | 2 |
| ANOS1     | chrX  | 8504983/C//A   | nonsynonymous | 0 | 2 |
| CA14      | chr1  | 150233925/C//T | synonymous    | 2 | 0 |
| KCNT2     | chr1  | 196397307/C//A | synonymous    | 2 | 0 |
| KIF21B    | chr1  | 200969696/G//A | nonsynonymous | 2 | 0 |
| EXOC8     | chr1  | 231472400/G//A | synonymous    | 2 | 0 |

|           |       |                  |               |   |   |
|-----------|-------|------------------|---------------|---|---|
| NRXN1     | chr2  | 51254925/G//A    | nonsynonymous | 2 | 0 |
| ZNF638    | chr2  | 71650791/G//C    | nonsynonymous | 2 | 0 |
| MAP4K4    | chr2  | 102486182/G//A   | synonymous    | 2 | 0 |
| TTN       | chr2  | 179460311/C//T   | nonsynonymous | 2 | 0 |
| TTN       | chr2  | 179588283/G//A   | nonsynonymous | 2 | 0 |
| DUSP19    | chr2  | 183943883/C//T   | synonymous    | 2 | 0 |
| ZNF502    | chr3  | 44763580/G//A    | nonsynonymous | 2 | 0 |
| ADAMTS9   | chr3  | 64526795/C//A    | nonsynonymous | 2 | 0 |
| LINC01205 | chr3  | 109129037/C//T   | synonymous    | 2 | 0 |
| PARP14    | chr3  | 122420480/A//T   | nonsynonymous | 2 | 0 |
| PRR23B    | chr3  | 138739094/A//G   | nonsynonymous | 2 | 0 |
| CCDC96    | chr4  | 7043936/G//T     | nonsynonymous | 2 | 0 |
| SORCS2    | chr4  | 7640138/G//T     | nonsynonymous | 2 | 0 |
| ADGRL3    | chr4  | 62897212/G//T    | nonsynonymous | 2 | 0 |
| FAT4      | chr4  | 126237907/C//T   | nonsynonymous | 2 | 0 |
| PLEKHG4B  | chr5  | 162951/G//A      | nonsynonymous | 2 | 0 |
| APC       | chr5  | 112174475/C//T   | nonsynonymous | 2 | 0 |
| JARID2    | chr6  | 15496357/C//G    | synonymous    | 2 | 0 |
| CDC5L     | chr6  | 44376240/T//C    | nonsynonymous | 2 | 0 |
| ZFAND2A   | chr7  | 1197351/C//A     | nonsynonymous | 2 | 0 |
| EEDP1     | chr7  | 36339009/C//A    | synonymous    | 2 | 0 |
| LRCH4     | chr7  | 100183719/G//A   | nonsynonymous | 2 | 0 |
| PIK3CG    | chr7  | 106508186/C//T   | synonymous    | 2 | 0 |
| TMEM168   | chr7  | 112407702/A//G   | synonymous    | 2 | 0 |
| CSMD3     | chr8  | 113562942/C//T   | nonsynonymous | 2 | 0 |
| SCRIB     | chr8  | 144892714/C//T   | nonsynonymous | 2 | 0 |
| ZNF517    | chr8  | 146033665/G//A   | nonsynonymous | 2 | 0 |
| DENND4C   | chr9  | 19296161/G//A    | nonsynonymous | 2 | 0 |
| ADARB2    | chr10 | 1405862/C//T     | synonymous    | 2 | 0 |
| LOXL4     | chr10 | 100021835/C//T   | nonsynonymous | 2 | 0 |
| SORCS3    | chr10 | 106916987/G//A   | nonsynonymous | 2 | 0 |
| PNLIPRP1  | chr10 | 118354337/G//T   | synonymous    | 2 | 0 |
| SMPD1     | chr11 | 6415617/T//A     | nonsynonymous | 2 | 0 |
| AHNAK     | chr11 | 62297747/T//G    | nonsynonymous | 2 | 0 |
| CLEC1A    | chr12 | 10241808/G//A    | synonymous    | 2 | 0 |
| KLRC2     | chr12 | 10584759/C//T    | nonsynonymous | 2 | 0 |
| LRRK2     | chr12 | 40629460/C//G    | nonsynonymous | 2 | 0 |
| FRY       | chr13 | 32785102/G//A    | nonsynonymous | 2 | 0 |
| TRPC4     | chr13 | 38357381/C//T    | synonymous    | 2 | 0 |
| CEP170B   | chr14 | 105349447/C//T   | nonsynonymous | 2 | 0 |
| HERC2     | chr15 | 28459335/C//T    | nonsynonymous | 2 | 0 |
| PDXDC1    | chr16 | 15122810/C//T    | nonsynonymous | 2 | 0 |
| NETO2     | chr16 | 47117654/G//A    | synonymous    | 2 | 0 |
| AMFR      | chr16 | 56423242/T//A    | synonymous    | 2 | 0 |
| ACD       | chr16 | 67692120/G//T    | synonymous    | 2 | 0 |
| TUBB3     | chr16 | 90001934/C//T    | nonsynonymous | 2 | 0 |
| TTL6      | chr17 | 46847424/G//A    | synonymous    | 2 | 0 |
| BAHCC1    | chr17 | 79423518/G//A    | nonsynonymous | 2 | 0 |
| SEH1L     | chr18 | 12982577/C//T    | synonymous    | 2 | 0 |
| CDH2      | chr18 | 25570209/C//T    | nonsynonymous | 2 | 0 |
| ADAMTS10  | chr19 | 8668648/G//A     | nonsynonymous | 2 | 0 |
| MUC16     | chr19 | 9058740/C//T     | nonsynonymous | 2 | 0 |
| COL5A3    | chr19 | 10085063/G//A    | nonsynonymous | 2 | 0 |
| COL5A3    | chr19 | 10097252/C//T    | nonsynonymous | 2 | 0 |
| MEF2B     | chr19 | 19256620/C//A    | nonsynonymous | 2 | 0 |
| PTPRT     | chr20 | 41419986/C//T    | nonsynonymous | 2 | 0 |
| OCSTAMP   | chr20 | 45170467/G//A    | nonsynonymous | 2 | 0 |
| NCAM2     | chr21 | 22710768/C//T    | nonsynonymous | 2 | 0 |
| AMER1     | chrX  | 63410856/G//A    | nonsynonymous | 2 | 0 |
| GPR61     | chr1  | 110085839/C//T   | synonymous    | 0 | 2 |
| TP53BP2   | chr1  | 223991129/ATT//A | nonsynonymous | 0 | 2 |
| TTC13     | chr1  | 231044713/A//G   | nonsynonymous | 0 | 2 |
| GCKR      | chr2  | 27728609/C//G    | nonsynonymous | 0 | 2 |
| NRXN1     | chr2  | 50765703/C//T    | nonsynonymous | 0 | 2 |
| DNAH6     | chr2  | 84822874/G//A    | synonymous    | 0 | 2 |
| IL18R1    | chr2  | 103013260/A//G   | nonsynonymous | 0 | 2 |
| ABCB11    | chr2  | 169783738/T//G   | nonsynonymous | 0 | 2 |
| GPR155    | chr2  | 175333714/T//C   | nonsynonymous | 0 | 2 |
| HOXD4     | chr2  | 177017341/C//G   | nonsynonymous | 0 | 2 |
| FZD7      | chr2  | 202899481/A//C   | synonymous    | 0 | 2 |

|          |       |                |               |   |   |
|----------|-------|----------------|---------------|---|---|
| CCDC14   | chr3  | 123634231/G//T | nonsynonymous | 0 | 2 |
| CDH9     | chr5  | 26902652/C//T  | nonsynonymous | 0 | 2 |
| CDH9     | chr5  | 26902665/T//G  | nonsynonymous | 0 | 2 |
| SMPDL3A  | chr6  | 123110440/C//T | synonymous    | 0 | 2 |
| HIVEP2   | chr6  | 143093216/T//C | nonsynonymous | 0 | 2 |
| TNRC18   | chr7  | 5417165/G//A   | synonymous    | 0 | 2 |
| ZNF3     | chr7  | 99669043/A//C  | nonsynonymous | 0 | 2 |
| RUNX1T1  | chr8  | 93029545/C//T  | synonymous    | 0 | 2 |
| FAM83H   | chr8  | 144808504/T//C | nonsynonymous | 0 | 2 |
| GNA14    | chr9  | 80039083/G//C  | nonsynonymous | 0 | 2 |
| CALML3   | chr10 | 5567131/T//C   | nonsynonymous | 0 | 2 |
|          | chr10 | 73466908/A//G  | synonymous    | 0 | 2 |
|          | chr10 | 102768311/C//G | synonymous    | 0 | 2 |
| NPS      | chr10 | 129347809/G//T | nonsynonymous | 0 | 2 |
| E2F8     | chr11 | 19258974/C//A  | nonsynonymous | 0 | 2 |
| VWF      | chr12 | 6122656/G//A   | synonymous    | 0 | 2 |
| ARID2    | chr12 | 46215247/A//T  | nonsynonymous | 0 | 2 |
| NBEA     | chr13 | 35923332/A//G  | synonymous    | 0 | 2 |
| DLL4     | chr15 | 41230310/A//G  | synonymous    | 0 | 2 |
| LIPC     | chr15 | 58834056/A//G  | nonsynonymous | 0 | 2 |
| TRIP4    | chr15 | 64710919/G//A  | synonymous    | 0 | 2 |
| ITGAM    | chr16 | 31335741/C//G  | nonsynonymous | 0 | 2 |
| MEGF8    | chr19 | 42857925/A//T  | nonsynonymous | 0 | 2 |
| AAR2     | chr20 | 34828240/C//T  | synonymous    | 0 | 2 |
| SOGA1    | chr20 | 35438510/T//C  | nonsynonymous | 0 | 2 |
| UMODL1   | chr21 | 43529675/G//A  | nonsynonymous | 0 | 2 |
| RLIM     | chrX  | 73814221/T//C  | nonsynonymous | 0 | 2 |
| CELA2A   | chr1  | 15792640/G//A  | nonsynonymous | 0 | 2 |
| SESN2    | chr1  | 28598312/G//A  | nonsynonymous | 0 | 2 |
| TMEM35B  | chr1  | 35449460/C//A  | nonsynonymous | 0 | 2 |
| PLD5     | chr1  | 242277329/C//A | nonsynonymous | 0 | 2 |
| DNAH1    | chr3  | 52379582/C//T  | nonsynonymous | 0 | 2 |
| PDZRN3   | chr3  | 73433871/C//T  | nonsynonymous | 0 | 2 |
| PRR23C   | chr3  | 138762920/G//A | synonymous    | 0 | 2 |
| MAD2L1   | chr4  | 120986940/C//T | nonsynonymous | 0 | 2 |
| CDH9     | chr5  | 26881457/A//T  | nonsynonymous | 0 | 2 |
| NEFL     | chr8  | 24811218/G//A  | nonsynonymous | 0 | 2 |
| FZD6     | chr8  | 104336880/G//A | synonymous    | 0 | 2 |
| KANK1    | chr9  | 712005/C//T    | synonymous    | 0 | 2 |
| APBA1    | chr9  | 72131897/C//T  | nonsynonymous | 0 | 2 |
| PSD      | chr10 | 104164434/G//A | nonsynonymous | 0 | 2 |
| PKP3     | chr11 | 400597/G//A    | synonymous    | 0 | 2 |
| OR52B2   | chr11 | 6191185/G//A   | synonymous    | 0 | 2 |
| MAP4K2   | chr11 | 64559404/G//A  | nonsynonymous | 0 | 2 |
| DNAJC14  | chr12 | 56221415/T//G  | nonsynonymous | 0 | 2 |
| SACS     | chr13 | 23913385/A//C  | nonsynonymous | 0 | 2 |
| NPAS3    | chr14 | 34243738/T//C  | nonsynonymous | 0 | 2 |
| PGBD4    | chr15 | 34395020/C//T  | synonymous    | 0 | 2 |
| KRT222   | chr17 | 38816346/G//A  | synonymous    | 0 | 2 |
| EPX      | chr17 | 56272378/C//T  | synonymous    | 0 | 2 |
| SUPT4H1  | chr17 | 56428830/C//T  | nonsynonymous | 0 | 2 |
| ZNF607   | chr19 | 38189301/T//C  | nonsynonymous | 0 | 2 |
| SIGLEC8  | chr19 | 51955858/G//T  | synonymous    | 0 | 2 |
| PEG3     | chr19 | 57325802/A//C  | nonsynonymous | 0 | 2 |
| MEI1     | chr22 | 42177301/T//C  | synonymous    | 0 | 2 |
| NLGN4X   | chrX  | 5811008/C//T   | synonymous    | 0 | 2 |
| FLJ44635 | chrX  | 71380085/A//G  | nonsynonymous | 0 | 2 |
| MUC12    | chr7  | 100646613/A//G | nonsynonymous | 1 | 1 |
| UBR4     | chr1  | 19475055/G//A  | nonsynonymous | 0 | 2 |
| NRAS     | chr1  | 115258747/C//T | nonsynonymous | 0 | 2 |
| BRINP3   | chr1  | 190067206/G//A | nonsynonymous | 0 | 2 |
| RYR2     | chr1  | 237941973/G//T | nonsynonymous | 0 | 2 |
| OTOF     | chr2  | 26696867/G//A  | nonsynonymous | 0 | 2 |
| FIGN     | chr2  | 164467671/G//T | nonsynonymous | 0 | 2 |
| LRP2     | chr2  | 170058138/G//A | nonsynonymous | 0 | 2 |
| SPATS2L  | chr2  | 201342380/C//T | nonsynonymous | 0 | 2 |
| PARD3B   | chr2  | 205978268/A//T | nonsynonymous | 0 | 2 |
| LRRFIP1  | chr2  | 238668828/C//T | nonsynonymous | 0 | 2 |
| LHFPL4   | chr3  | 9547661/C//T   | synonymous    | 0 | 2 |
| HDAC11   | chr3  | 13545700/C//T  | synonymous    | 0 | 2 |

|           |       |                          |               |   |   |
|-----------|-------|--------------------------|---------------|---|---|
| DLEC1     | chr3  | 38138681/C//T            | synonymous    | 0 | 2 |
| IQCF1     | chr3  | 51928947/AAGGCCCTGAGTCCA | nonsynonymous | 0 | 2 |
| ROBO2     | chr3  | 77623761/C//T            | nonsynonymous | 0 | 2 |
| OTOP1     | chr4  | 4199549/G//A             | nonsynonymous | 0 | 2 |
| HPGDS     | chr4  | 95239083/A//G            | nonsynonymous | 0 | 2 |
| NAA15     | chr4  | 140282934/G//A           | synonymous    | 0 | 2 |
| RXFP3     | chr5  | 33937730/C//T            | synonymous    | 0 | 2 |
| RICTOR    | chr5  | 38954879/T//C            | synonymous    | 0 | 2 |
| PCDHA5    | chr5  | 140202652/C//T           | nonsynonymous | 0 | 2 |
| PCDHA13   | chr5  | 140264048/G//C           | nonsynonymous | 0 | 2 |
| PCDHB4    | chr5  | 140503944/C//A           | nonsynonymous | 0 | 2 |
| PLN       | chr6  | 118880157/C//T           | nonsynonymous | 0 | 2 |
| FNDC1     | chr6  | 159657346/G//A           | nonsynonymous | 0 | 2 |
| VPS41     | chr7  | 38835199/A//G            | nonsynonymous | 0 | 2 |
| VPS50     | chr7  | 92940544/T//C            | synonymous    | 0 | 2 |
| PSMC2     | chr7  | 103008511/G//A           | synonymous    | 0 | 2 |
| RELN      | chr7  | 103294537/T//C           | synonymous    | 0 | 2 |
| SSPO      | chr7  | 149511666/C//T           | synonymous    | 0 | 2 |
| PTPRN2    | chr7  | 157959718/G//T           | nonsynonymous | 0 | 2 |
| RALYL     | chr8  | 85441584/G//A            | nonsynonymous | 0 | 2 |
| RUNX1T1   | chr8  | 92972726/C//T            | nonsynonymous | 0 | 2 |
| EPPK1     | chr8  | 144946137/G//C           | nonsynonymous | 0 | 2 |
| TNC       | chr9  | 117848461/C//T           | nonsynonymous | 0 | 2 |
| CEL       | chr9  | 135942036/G//A           | nonsynonymous | 0 | 2 |
| DIP2C     | chr10 | 373045/G//C              | synonymous    | 0 | 2 |
| FRMD4A    | chr10 | 13698843/C//T            | nonsynonymous | 0 | 2 |
| SH3PXD2A  | chr10 | 105361825/G//C           | synonymous    | 0 | 2 |
| GRK5      | chr10 | 121201572/C//T           | synonymous    | 0 | 2 |
| NKX6-2    | chr10 | 134598483/C//A           | nonsynonymous | 0 | 2 |
| MUC15     | chr11 | 26587101/G//A            | nonsynonymous | 0 | 2 |
| LTBP3     | chr11 | 65306534/GGGCGGCGTC//G   | synonymous    | 0 | 2 |
| FGF3      | chr11 | 69625251/C//T            | nonsynonymous | 0 | 2 |
| POLD3     | chr11 | 74329613/C//T            | nonsynonymous | 0 | 2 |
| MTNR1B    | chr11 | 92714845/C//T            | synonymous    | 0 | 2 |
| ELMOD1    | chr11 | 107521069/C//T           | nonsynonymous | 0 | 2 |
| OLR1      | chr12 | 10319473/G//A            | nonsynonymous | 0 | 2 |
| SOX5      | chr12 | 23716202/C//T            | nonsynonymous | 0 | 2 |
| PDZRN4    | chr12 | 41967454/G//A            | nonsynonymous | 0 | 2 |
| SOAT2     | chr12 | 53509269/C//T            | nonsynonymous | 0 | 2 |
| TRPV4     | chr12 | 110232135/G//C           | nonsynonymous | 0 | 2 |
| SCARB1    | chr12 | 125284728/G//A           | nonsynonymous | 0 | 2 |
| SHISA2    | chr13 | 26624903/C//A            | nonsynonymous | 0 | 2 |
| FLRT2     | chr14 | 86088314/C//T            | synonymous    | 0 | 2 |
| GABRG3    | chr15 | 27772697/C//T            | synonymous    | 0 | 2 |
| SLTM      | chr15 | 59205706/C//T            | nonsynonymous | 0 | 2 |
| CYP1A2    | chr15 | 75042385/C//T            | synonymous    | 0 | 2 |
| IRX5      | chr16 | 54966758/G//A            | nonsynonymous | 0 | 2 |
| JPH3      | chr16 | 87677988/C//T            | synonymous    | 0 | 2 |
| PIEZO1    | chr16 | 88786135/C//T            | synonymous    | 0 | 2 |
| MFSD6L    | chr17 | 8701955/G//A             | nonsynonymous | 0 | 2 |
| RNF213    | chr17 | 78313970/G//A            | nonsynonymous | 0 | 2 |
| CCDC57    | chr17 | 80159745/C//A            | nonsynonymous | 0 | 2 |
| SLC25A23  | chr19 | 6454630/C//T             | synonymous    | 0 | 2 |
| ZNF492    | chr19 | 22847832/G//A            | nonsynonymous | 0 | 2 |
| CEACAM21  | chr19 | 42090784/G//A            | nonsynonymous | 0 | 2 |
| SIGLEC1   | chr20 | 3684736/C//A             | nonsynonymous | 0 | 2 |
| SEL1L2    | chr20 | 13866929/A//T            | synonymous    | 0 | 2 |
| SEMG1     | chr20 | 43836216/C//T            | nonsynonymous | 0 | 2 |
| PCIF1     | chr20 | 44575770/G//A            | nonsynonymous | 0 | 2 |
| KRTAP24-1 | chr21 | 31655055/C//T            | nonsynonymous | 0 | 2 |
| COL18A1   | chr21 | 46929314/C//T            | synonymous    | 0 | 2 |
| ARVCF     | chr22 | 19959493/G//A            | synonymous    | 0 | 2 |
| MAP7D3    | chrX  | 135308130/G//A           | nonsynonymous | 0 | 2 |
| ASPM      | chr1  | 197112784/T//C           | nonsynonymous | 2 | 0 |
| SPATA3    | chr2  | 231861231/C//T           | nonsynonymous | 2 | 0 |
| OR5H14    | chr3  | 97869141/G//T            | nonsynonymous | 2 | 0 |
| PCDHA8    | chr5  | 140223065/C//T           | nonsynonymous | 2 | 0 |
| STXBP5    | chr6  | 147705975/A//G           | synonymous    | 2 | 0 |
| FAM120B   | chr6  | 170632188/C//T           | nonsynonymous | 2 | 0 |
| SRPK2     | chr7  | 104766711/T//C           | synonymous    | 2 | 0 |

|           |       |                |               |   |   |
|-----------|-------|----------------|---------------|---|---|
| ESYT2     | chr7  | 158557420/T//G | nonsynonymous | 2 | 0 |
| TLR4      | chr9  | 120476222/C//T | nonsynonymous | 2 | 0 |
| MYBPC1    | chr12 | 102067281/C//G | nonsynonymous | 2 | 0 |
| MYBPC1    | chr12 | 102067351/C//T | synonymous    | 2 | 0 |
| CIT       | chr12 | 120151997/C//A | synonymous    | 2 | 0 |
| CIT       | chr12 | 120152075/C//T | synonymous    | 2 | 0 |
| CIT       | chr12 | 120152080/C//T | nonsynonymous | 2 | 0 |
| CIT       | chr12 | 120156153/C//T | synonymous    | 2 | 0 |
| NDC80     | chr18 | 2608742/C//T   | nonsynonymous | 2 | 0 |
| CEP192    | chr18 | 13018531/C//G  | nonsynonymous | 2 | 0 |
| CHST9     | chr18 | 24496723/A//G  | nonsynonymous | 2 | 0 |
| LOXHD1    | chr18 | 44057420/G//A  | synonymous    | 2 | 0 |
| PORCN     | chrX  | 48372705/C//T  | nonsynonymous | 2 | 0 |
| ASAP3     | chr1  | 23759684/C//T  | nonsynonymous | 0 | 2 |
| GRIK3     | chr1  | 37324731/C//T  | nonsynonymous | 0 | 2 |
| PATJ      | chr1  | 62593737/G//A  | nonsynonymous | 0 | 2 |
| NPR1      | chr1  | 153661554/T//A | nonsynonymous | 0 | 2 |
| ATP8B2    | chr1  | 154304153/C//T | nonsynonymous | 0 | 2 |
| CACNA1E   | chr1  | 181765941/C//T | nonsynonymous | 0 | 2 |
| OBSCN     | chr1  | 228528511/C//T | synonymous    | 0 | 2 |
| RYR2      | chr1  | 237586435/C//T | nonsynonymous | 0 | 2 |
| HEATR5B   | chr2  | 37247902/G//A  | nonsynonymous | 0 | 2 |
| UGGT1     | chr2  | 128886756/G//A | synonymous    | 0 | 2 |
| TTN       | chr2  | 179579734/C//T | nonsynonymous | 0 | 2 |
| ITIH1     | chr3  | 52825525/C//G  | synonymous    | 0 | 2 |
| PCDH10    | chr4  | 134072546/C//A | synonymous    | 0 | 2 |
| PCDH18    | chr4  | 138451527/G//A | synonymous    | 0 | 2 |
| MICB      | chr6  | 31473408/C//T  | nonsynonymous | 0 | 2 |
| MCM3      | chr6  | 52133903/T//C  | nonsynonymous | 0 | 2 |
| CSMD1     | chr8  | 3267117/C//A   | nonsynonymous | 0 | 2 |
| CACNA1B   | chr9  | 140972618/C//T | nonsynonymous | 0 | 2 |
| CREM      | chr10 | 35477252/C//T  | synonymous    | 0 | 2 |
| CTR9      | chr11 | 10800351/G//A  | nonsynonymous | 0 | 2 |
| SLC6A5    | chr11 | 20673889/C//T  | nonsynonymous | 0 | 2 |
| SLC22A12  | chr11 | 64361032/G//A  | nonsynonymous | 0 | 2 |
| RELT      | chr11 | 73105561/G//A  | synonymous    | 0 | 2 |
| GRIK4     | chr11 | 120837973/T//C | nonsynonymous | 0 | 2 |
| TMEM52B   | chr12 | 10339095/C//T  | nonsynonymous | 0 | 2 |
| H1FNT     | chr12 | 48723366/G//A  | nonsynonymous | 0 | 2 |
| METTL1    | chr12 | 58163609/G//C  | synonymous    | 0 | 2 |
| MGAT4C    | chr12 | 86373360/C//A  | nonsynonymous | 0 | 2 |
| ANKS1B    | chr12 | 99194813/C//A  | nonsynonymous | 0 | 2 |
| COL4A2    | chr13 | 111082263/A//G | nonsynonymous | 0 | 2 |
| INSM2     | chr14 | 36003457/C//A  | synonymous    | 0 | 2 |
| TGFB3     | chr14 | 76427303/C//G  | nonsynonymous | 0 | 2 |
| UNC13C    | chr15 | 54542602/C//T  | synonymous    | 0 | 2 |
| SCAMP5    | chr15 | 75304135/C//T  | synonymous    | 0 | 2 |
| GAS7      | chr17 | 9846527/G//A   | synonymous    | 0 | 2 |
| TTLL6     | chr17 | 46865256/C//T  | synonymous    | 0 | 2 |
| AXIN2     | chr17 | 63554326/T//C  | nonsynonymous | 0 | 2 |
| CSNK1D    | chr17 | 80207436/C//A  | nonsynonymous | 0 | 2 |
| TMEM259   | chr19 | 1011178/G//C   | nonsynonymous | 0 | 2 |
| ZNF729    | chr19 | 22498010/G//A  | synonymous    | 0 | 2 |
| PRR12     | chr19 | 50100861/C//A  | nonsynonymous | 0 | 2 |
| COL6A2    | chr21 | 47552424/G//A  | synonymous    | 0 | 2 |
| SBF1      | chr22 | 50885850/C//T  | synonymous    | 0 | 2 |
| ZNF41     | chrX  | 47307035/A//C  | nonsynonymous | 0 | 2 |
| CXorf56   | chrX  | 118673642/C//T | synonymous    | 0 | 2 |
| RAP1GAP   | chr1  | 21934834/G//A  | nonsynonymous | 0 | 2 |
| DMRTA2    | chr1  | 50885051/C//G  | synonymous    | 0 | 2 |
| HIST2H2AB | chr1  | 149859170/C//T | synonymous    | 0 | 2 |
| HIST2H2AB | chr1  | 149859172/C//T | nonsynonymous | 0 | 2 |
| BCAN      | chr1  | 156622488/C//T | synonymous    | 0 | 2 |
| LRRC52    | chr1  | 165514161/G//A | synonymous    | 0 | 2 |
| CRB1      | chr1  | 197396761/G//A | nonsynonymous | 0 | 2 |
| GNPAT     | chr1  | 231396396/G//A | synonymous    | 0 | 2 |
| FMN2      | chr1  | 240370270/G//A | nonsynonymous | 0 | 2 |
| HNRNPU    | chr1  | 245022635/A//C | nonsynonymous | 0 | 2 |
| TEKT4     | chr2  | 95541339/C//T  | nonsynonymous | 0 | 2 |
| FBLN7     | chr2  | 112944752/G//T | nonsynonymous | 0 | 2 |



|          |       |                |               |   |   |
|----------|-------|----------------|---------------|---|---|
| SLC35F5  | chr2  | 114508060/A//G | nonsynonymous | 0 | 2 |
| THSD7B   | chr2  | 137928507/C//T | synonymous    | 0 | 2 |
| CERS6    | chr2  | 169404125/G//A | nonsynonymous | 0 | 2 |
| KIF1A    | chr2  | 241697895/G//A | nonsynonymous | 0 | 2 |
| TMEM43   | chr3  | 14183314/C//T  | synonymous    | 0 | 2 |
| DCLK3    | chr3  | 36779958/C//T  | nonsynonymous | 0 | 2 |
| ITGA9    | chr3  | 37550054/A//G  | nonsynonymous | 0 | 2 |
| DENND6A  | chr3  | 57678692/G//C  | nonsynonymous | 0 | 2 |
| CLCN2    | chr3  | 184071513/G//A | nonsynonymous | 0 | 2 |
| ATP8A1   | chr4  | 42445623/G//A  | synonymous    | 0 | 2 |
| TACR3    | chr4  | 104640933/G//A | synonymous    | 0 | 2 |
| GRIA2    | chr4  | 158262484/C//T | nonsynonymous | 0 | 2 |
| TLL1     | chr4  | 166960527/A//G | nonsynonymous | 0 | 2 |
| POLK     | chr5  | 74842927/G//T  | nonsynonymous | 0 | 2 |
| RAPGEF6  | chr5  | 130799835/A//G | synonymous    | 0 | 2 |
| PCDHAC1  | chr5  | 140307102/G//A | nonsynonymous | 0 | 2 |
| PCDHGA2  | chr5  | 140718644/C//T | nonsynonymous | 0 | 2 |
| PCDHGA8  | chr5  | 140774357/G//A | synonymous    | 0 | 2 |
| GPRIN1   | chr5  | 176025721/C//T | nonsynonymous | 0 | 2 |
| B3GAT2   | chr6  | 71665713/C//T  | synonymous    | 0 | 2 |
| COL10A1  | chr6  | 116442979/C//T | synonymous    | 0 | 2 |
| DSE      | chr6  | 116754714/G//C | nonsynonymous | 0 | 2 |
| ROS1     | chr6  | 117725598/A//G | synonymous    | 0 | 2 |
| TLL2     | chr6  | 167738715/G//A | synonymous    | 0 | 2 |
| GLI3     | chr7  | 42004686/C//T  | nonsynonymous | 0 | 2 |
| ZNF479   | chr7  | 57188092/T//C  | nonsynonymous | 0 | 2 |
| ZAN      | chr7  | 100390034/G//A | nonsynonymous | 0 | 2 |
| LRGUK    | chr7  | 133884009/G//A | nonsynonymous | 0 | 2 |
| SSPO     | chr7  | 149489292/C//T | nonsynonymous | 0 | 2 |
| YTHDF3   | chr8  | 64099205/G//T  | nonsynonymous | 0 | 2 |
| PKHD1L1  | chr8  | 110457746/G//A | nonsynonymous | 0 | 2 |
| CPSF1    | chr8  | 145619510/G//A | synonymous    | 0 | 2 |
| SARDH    | chr9  | 136573472/G//A | synonymous    | 0 | 2 |
| FBXO18   | chr10 | 5966282/G//A   | nonsynonymous | 0 | 2 |
| KIAA1462 | chr10 | 30318130/C//A  | nonsynonymous | 0 | 2 |
| PANK1    | chr10 | 91371689/G//T  | synonymous    | 0 | 2 |
| ITPRIP   | chr10 | 106075620/C//T | nonsynonymous | 0 | 2 |
| BRSK2    | chr11 | 1464831/G//A   | nonsynonymous | 0 | 2 |
| ANO5     | chr11 | 22272296/C//A  | synonymous    | 0 | 2 |
| LRTOMT   | chr11 | 71819891/C//T  | nonsynonymous | 0 | 2 |
| DYNC2H1  | chr11 | 103027374/G//T | nonsynonymous | 0 | 2 |
| POU2F3   | chr11 | 120117184/G//A | nonsynonymous | 0 | 2 |
| TECTA    | chr11 | 120996079/C//A | synonymous    | 0 | 2 |
| B3GAT1   | chr11 | 134253894/C//T | nonsynonymous | 0 | 2 |
| CHD4     | chr12 | 6702280/G//A   | nonsynonymous | 0 | 2 |
| TMEM52B  | chr12 | 10332173/G//A  | synonymous    | 0 | 2 |
| BCAT1    | chr12 | 24995151/C//T  | nonsynonymous | 0 | 2 |
| KIF21A   | chr12 | 39730911/T//G  | nonsynonymous | 0 | 2 |
| PUS7L    | chr12 | 44124189/T//A  | nonsynonymous | 0 | 2 |
| TMPRSS12 | chr12 | 51237641/G//A  | synonymous    | 0 | 2 |
| NCKAP1L  | chr12 | 54903701/C//T  | nonsynonymous | 0 | 2 |
| NAV3     | chr12 | 78512043/G//T  | nonsynonymous | 0 | 2 |
| MYF6     | chr12 | 81102787/G//A  | synonymous    | 0 | 2 |
| GALNT4   | chr12 | 89918364/A//T  | synonymous    | 0 | 2 |
| UBE3B    | chr12 | 109964182/T//A | nonsynonymous | 0 | 2 |
| UBE3B    | chr12 | 109964184/C//G | nonsynonymous | 0 | 2 |
| OAS2     | chr12 | 113444352/C//T | nonsynonymous | 0 | 2 |
| CFAP73   | chr12 | 113593100/G//A | synonymous    | 0 | 2 |
| NCOR2    | chr12 | 124824955/C//T | synonymous    | 0 | 2 |
| MTUS2    | chr13 | 29600313/G//A  | nonsynonymous | 0 | 2 |
| STOML3   | chr13 | 39550715/C//T  | nonsynonymous | 0 | 2 |
| SIPA1L1  | chr14 | 72190597/C//A  | nonsynonymous | 0 | 2 |
| SPTLC2   | chr14 | 77978689/G//A  | nonsynonymous | 0 | 2 |
| STON2    | chr14 | 81743739/C//A  | nonsynonymous | 0 | 2 |
| EML5     | chr14 | 89206753/C//T  | nonsynonymous | 0 | 2 |
| BAHD1    | chr15 | 40758204/C//T  | nonsynonymous | 0 | 2 |
| CHRNA4   | chr15 | 78921579/C//T  | synonymous    | 0 | 2 |
| BNC1     | chr15 | 83926317/C//T  | synonymous    | 0 | 2 |
| DECR2    | chr16 | 461021/C//T    | synonymous    | 0 | 2 |
| TBL3     | chr16 | 2024412/C//T   | synonymous    | 0 | 2 |

|            |       |                 |               |   |   |
|------------|-------|-----------------|---------------|---|---|
| DCUN1D3    | chr16 | 20871597/CTT//C | nonsynonymous | 0 | 2 |
| MYLPF      | chr16 | 30387520/C//T   | nonsynonymous | 0 | 2 |
| CES1       | chr16 | 55866969/G//A   | synonymous    | 0 | 2 |
| MT1E       | chr16 | 56659717/G//C   | synonymous    | 0 | 2 |
| CNGB1      | chr16 | 57993927/G//T   | nonsynonymous | 0 | 2 |
| IRF8       | chr16 | 85952175/T//C   | nonsynonymous | 0 | 2 |
| CBFA2T3    | chr16 | 88967911/C//T   | nonsynonymous | 0 | 2 |
| LOXHD1     | chr18 | 44102168/G//A   | nonsynonymous | 0 | 2 |
| MBD1       | chr18 | 47800143/G//A   | nonsynonymous | 0 | 2 |
| CBLN2      | chr18 | 70209125/C//T   | nonsynonymous | 0 | 2 |
| PNPLA6     | chr19 | 7600391/C//T    | synonymous    | 0 | 2 |
| OLFM2      | chr19 | 9965354/G//T    | nonsynonymous | 0 | 2 |
| CHERP      | chr19 | 16631213/C//T   | synonymous    | 0 | 2 |
| TMEM59L    | chr19 | 18727860/C//T   | synonymous    | 0 | 2 |
| SRRM5      | chr19 | 44118015/G//A   | nonsynonymous | 0 | 2 |
| BBC3       | chr19 | 47729925/G//A   | nonsynonymous | 0 | 2 |
| ZNF765     | chr19 | 53911775/G//A   | nonsynonymous | 0 | 2 |
| KIR3DL2    | chr19 | 55378169/C//A   | nonsynonymous | 0 | 2 |
| SOX12      | chr20 | 307141/G//T     | synonymous    | 0 | 2 |
| SIGLEC1    | chr20 | 3678574/C//G    | nonsynonymous | 0 | 2 |
| BPIFB2     | chr20 | 31603251/C//T   | synonymous    | 0 | 2 |
| BLCAP      | chr20 | 36147288/C//T   | synonymous    | 0 | 2 |
| ZNF335     | chr20 | 44586537/A//G   | nonsynonymous | 0 | 2 |
| GNAS       | chr20 | 57428567/C//A   | nonsynonymous | 0 | 2 |
| TCF20      | chr22 | 42607920/C//CT  | nonsynonymous | 0 | 2 |
| STS        | chrX  | 7268248/C//T    | synonymous    | 0 | 2 |
| NHS        | chrX  | 17393902/G//A   | nonsynonymous | 0 | 2 |
| RBM10      | chrX  | 47038832/G//A   | nonsynonymous | 0 | 2 |
| MTMR8      | chrX  | 63551614/G//C   | nonsynonymous | 0 | 2 |
| MAGEC1     | chrX  | 140995993/C//G  | nonsynonymous | 0 | 2 |
| MAGEA5     | chrX  | 151284015/C//T  | synonymous    | 0 | 2 |
| AADACL3    | chr1  | 12780908/C//T   | nonsynonymous | 0 | 2 |
| HSPG2      | chr1  | 22173979/C//T   | nonsynonymous | 0 | 2 |
| DENND2C    | chr1  | 115168392/C//G  | nonsynonymous | 0 | 2 |
| JTB        | chr1  | 153947137/T//C  | synonymous    | 0 | 2 |
| MNDA       | chr1  | 158817521/A//C  | nonsynonymous | 0 | 2 |
| CEP350     | chr1  | 179983081/A//C  | nonsynonymous | 0 | 2 |
| TP53BP2    | chr1  | 223983855/G//C  | nonsynonymous | 0 | 2 |
| CD207      | chr2  | 71062848/G//A   | nonsynonymous | 0 | 2 |
| LIMS1      | chr2  | 109300538/C//T  | synonymous    | 0 | 2 |
| LY75-CD302 | chr2  | 160706506/C//T  | synonymous    | 0 | 2 |
| LRP2       | chr2  | 170009329/T//G  | synonymous    | 0 | 2 |
| TTN        | chr2  | 179641109/G//C  | nonsynonymous | 0 | 2 |
| COL5A2     | chr2  | 189933587/C//T  | synonymous    | 0 | 2 |
| ITGA9      | chr3  | 37583996/G//C   | nonsynonymous | 0 | 2 |
| HYAL3      | chr3  | 50331102/G//A   | synonymous    | 0 | 2 |
| EIF4A2     | chr3  | 186506949/T//A  | nonsynonymous | 0 | 2 |
| CWH43      | chr4  | 48988363/C//T   | synonymous    | 0 | 2 |
| CCSER1     | chr4  | 91229688/C//G   | nonsynonymous | 0 | 2 |
| SEC24A     | chr5  | 134039502/C//T  | synonymous    | 0 | 2 |
| EGR1       | chr5  | 137803329/C//T  | synonymous    | 0 | 2 |
| LARP1      | chr5  | 154181737/G//A  | synonymous    | 0 | 2 |
| DOCK2      | chr5  | 169469134/A//G  | nonsynonymous | 0 | 2 |
| EGFL8      | chr6  | 32134489/G//A   | nonsynonymous | 0 | 2 |
| CDK19      | chr6  | 110942342/T//C  | nonsynonymous | 0 | 2 |
| HDAC2      | chr6  | 114274585/G//A  | synonymous    | 0 | 2 |
| ARL4A      | chr7  | 12727831/C//T   | synonymous    | 0 | 2 |
| DNAH11     | chr7  | 21923982/G//A   | nonsynonymous | 0 | 2 |
| LRCH4      | chr7  | 100174570/C//T  | nonsynonymous | 0 | 2 |
| KIAA1549   | chr7  | 138579169/G//T  | synonymous    | 0 | 2 |
| CNTNAP2    | chr7  | 146997331/C//T  | nonsynonymous | 0 | 2 |
| RP1L1      | chr8  | 10470181/G//A   | nonsynonymous | 0 | 2 |
| MRPL13     | chr8  | 121408351/G//A  | nonsynonymous | 0 | 2 |
| FAM135B    | chr8  | 139164502/A//G  | nonsynonymous | 0 | 2 |
| RIC1       | chr9  | 5629361/C//G    | nonsynonymous | 0 | 2 |
| ASPN       | chr9  | 95228860/C//G   | synonymous    | 0 | 2 |
| ZNF25      | chr10 | 38242118/C//G   | nonsynonymous | 0 | 2 |
| PNLIPRP2   | chr10 | 118385579/C//T  | synonymous    | 0 | 2 |
| RRM1       | chr11 | 4156442/A//G    | nonsynonymous | 0 | 2 |
| OR51G2     | chr11 | 4936129/G//A    | synonymous    | 0 | 2 |

|              |       |                    |               |   |   |
|--------------|-------|--------------------|---------------|---|---|
| WEE1         | chr11 | 9595518/G//A       | nonsynonymous | 0 | 2 |
| RRAS2        | chr11 | 14316390/T//A      | nonsynonymous | 0 | 2 |
| OR8H1        | chr11 | 56058411/A//T      | nonsynonymous | 0 | 2 |
| NRXN2        | chr11 | 64415794/G//A      | synonymous    | 0 | 2 |
| LRP5         | chr11 | 68216514/G//A      | synonymous    | 0 | 2 |
| DEFB108B     | chr11 | 71548514/A//G      | nonsynonymous | 0 | 2 |
| TIGAR        | chr12 | 4446274/A//G       | nonsynonymous | 0 | 2 |
| KLRG1        | chr12 | 9162114/G//T       | nonsynonymous | 0 | 2 |
| FMN1         | chr15 | 33192235/T//C      | nonsynonymous | 0 | 2 |
| LMF1         | chr16 | 920817/C//T        | nonsynonymous | 0 | 2 |
| CREBBP       | chr16 | 3801752/C//G       | nonsynonymous | 0 | 2 |
| ADAMTS18     | chr16 | 77387786/G//T      | synonymous    | 0 | 2 |
| XAF1         | chr17 | 6659334/T//G       | synonymous    | 0 | 2 |
| HOXB2        | chr17 | 46620414/G//A      | synonymous    | 0 | 2 |
| WBP2         | chr17 | 73843589/C//T      | nonsynonymous | 0 | 2 |
| ASXL3        | chr18 | 31323977/A//G      | nonsynonymous | 0 | 2 |
| SERPINB11    | chr18 | 61390453/C//A      | nonsynonymous | 0 | 2 |
| HAS1         | chr19 | 52217145/G//A      | synonymous    | 0 | 2 |
| SS18L1       | chr20 | 60737958/G//A      | nonsynonymous | 0 | 2 |
| ZC3H7B       | chr22 | 41744093/G//A      | nonsynonymous | 0 | 2 |
| ASB11        | chrX  | 15315747/G//C      | nonsynonymous | 0 | 2 |
| AMER1        | chrX  | 63412600/T//C      | synonymous    | 0 | 2 |
| GJB1         | chrX  | 70444389/G//A      | nonsynonymous | 0 | 2 |
| DCAF12L1     | chrX  | 125685239/A//C     | synonymous    | 0 | 2 |
| ITGA8        | chr10 | 15559199/G//A      | synonymous    | 2 | 0 |
| THEM4        | chr1  | 151849539/T//G     | nonsynonymous | 0 | 2 |
| UBR3         | chr2  | 170783230/A//G     | nonsynonymous | 0 | 2 |
| GPR155       | chr2  | 175337925/C//T     | nonsynonymous | 0 | 2 |
| TTN          | chr2  | 179434345/A//C     | nonsynonymous | 0 | 2 |
| ATP13A4      | chr3  | 193128778/C//T     | nonsynonymous | 0 | 2 |
| TMEM150C     | chr4  | 83411273/C//T      | nonsynonymous | 0 | 2 |
| LOC100288152 | chr5  | 475371/C//T        | synonymous    | 0 | 2 |
| ADGRV1       | chr5  | 90040872/T//A      | nonsynonymous | 0 | 2 |
| APC          | chr5  | 112174905/GC//G    | nonsynonymous | 0 | 2 |
| HLA-DRA      | chr6  | 32411144/C//T      | nonsynonymous | 0 | 2 |
| TAP2         | chr6  | 32797287/C//A      | nonsynonymous | 0 | 2 |
| DBF4         | chr7  | 87537189/A//C      | nonsynonymous | 0 | 2 |
| SETX         | chr9  | 135203354/G//A     | nonsynonymous | 0 | 2 |
| FBXL15       | chr10 | 104180858/T//A     | synonymous    | 0 | 2 |
| LRP5         | chr11 | 68192598/C//T      | nonsynonymous | 0 | 2 |
| EMSY         | chr11 | 76227234/G//A      | nonsynonymous | 0 | 2 |
| ETFBKMT      | chr12 | 31814952/G//A      | nonsynonymous | 0 | 2 |
| DDN          | chr12 | 49391638/C//T      | nonsynonymous | 0 | 2 |
| PPP2R5C      | chr14 | 102378789/T//C     | synonymous    | 0 | 2 |
| GOT2         | chr16 | 58743459/C//A      | synonymous    | 0 | 2 |
| SCARF1       | chr17 | 1538599/G//A       | nonsynonymous | 0 | 2 |
| ATAD5        | chr17 | 29187506/A//T      | nonsynonymous | 0 | 2 |
| CRHR1        | chr17 | 43906964/G//A      | nonsynonymous | 0 | 2 |
| RNASEH2A     | chr19 | 12924401/G//A      | synonymous    | 0 | 2 |
| ZSCAN1       | chr19 | 58565347/C//T      | synonymous    | 0 | 2 |
| CSTL1        | chr20 | 23425414/A//C      | nonsynonymous | 0 | 2 |
| JPH2         | chr20 | 42815301/G//A      | synonymous    | 0 | 2 |
| ZNF831       | chr20 | 57768129/C//T      | synonymous    | 0 | 2 |
| VSIG1        | chrX  | 107310317/C//T     | nonsynonymous | 0 | 2 |
| ADGRG4       | chrX  | 135475738/TAGTA//T | synonymous    | 0 | 2 |
| ZNF91        | chr19 | 23543393/C//T      | synonymous    | 1 | 1 |
|              | chr5  | 58295378/A//G      | synonymous    | 1 | 1 |
| ACP6         | chr1  | 147120168/G//C     | synonymous    | 0 | 2 |
| MSH6         | chr2  | 48026865/A//C      | nonsynonymous | 0 | 2 |
| IMPG2        | chr3  | 100951717/T//C     | synonymous    | 0 | 2 |
| ITGB5        | chr3  | 124492625/A//T     | nonsynonymous | 0 | 2 |
| TMEM14EP     | chr3  | 152058325/C//G     | synonymous    | 0 | 2 |
| ZSCAN25      | chr7  | 99227024/A//G      | nonsynonymous | 0 | 2 |
| PNPLA7       | chr9  | 140361788/C//T     | nonsynonymous | 0 | 2 |
| ITGB1        | chr10 | 33200888/T//C      | nonsynonymous | 0 | 2 |
| HCFC2        | chr12 | 104489320/A//G     | nonsynonymous | 0 | 2 |
| DACH1        | chr13 | 72063208/G//C      | nonsynonymous | 0 | 2 |
| MINK1        | chr17 | 4791066/A//G       | nonsynonymous | 0 | 2 |
| ADORA2B      | chr17 | 15878541/G//A      | nonsynonymous | 0 | 2 |
| SLC16A2      | chrX  | 73744207/C//T      | nonsynonymous | 0 | 2 |

|          |       |                 |               |   |   |
|----------|-------|-----------------|---------------|---|---|
| MUC5B    | chr11 | 1269835/G//A    | nonsynonymous | 1 | 1 |
| SLC2A5   | chr1  | 9100037/G//A    | nonsynonymous | 0 | 2 |
| CSMD2    | chr1  | 34071032/C//A   | nonsynonymous | 0 | 2 |
| TMEM53   | chr1  | 45120287/G//A   | nonsynonymous | 0 | 2 |
| MKNK1    | chr1  | 47059780/C//G   | synonymous    | 0 | 2 |
| NPR1     | chr1  | 153659829/G//A  | nonsynonymous | 0 | 2 |
| FCRL4    | chr1  | 157545354/T//G  | nonsynonymous | 0 | 2 |
| TPO      | chr2  | 1457562/C//A    | synonymous    | 0 | 2 |
| SOX11    | chr2  | 5833402/C//A    | synonymous    | 0 | 2 |
| APOB     | chr2  | 21234034/C//T   | synonymous    | 0 | 2 |
| ALK      | chr2  | 29436871/T//A   | nonsynonymous | 0 | 2 |
| COX7A2L  | chr2  | 42580398/T//A   | nonsynonymous | 0 | 2 |
| NRXN1    | chr2  | 50779958/C//T   | nonsynonymous | 0 | 2 |
| SLC4A10  | chr2  | 162813669/C//T  | synonymous    | 0 | 2 |
| SCN3A    | chr2  | 165952159/C//G  | nonsynonymous | 0 | 2 |
| CWC22    | chr2  | 180830642/C//A  | nonsynonymous | 0 | 2 |
| ZNF804A  | chr2  | 185801540/C//G  | nonsynonymous | 0 | 2 |
| DNAH7    | chr2  | 196682523/C//A  | nonsynonymous | 0 | 2 |
| PLCL1    | chr2  | 198949860/A//T  | nonsynonymous | 0 | 2 |
| GRM7     | chr3  | 7620980/C//T    | nonsynonymous | 0 | 2 |
| PRRT3    | chr3  | 9990781/C//G    | synonymous    | 0 | 2 |
| WNT5A    | chr3  | 55513444/C//A   | nonsynonymous | 0 | 2 |
| CASR     | chr3  | 121994736/G//A  | synonymous    | 0 | 2 |
| PIK3R4   | chr3  | 130425975/T//A  | nonsynonymous | 0 | 2 |
| PIK3CB   | chr3  | 138403578/C//T  | nonsynonymous | 0 | 2 |
| HPS3     | chr3  | 148872972/G//A  | synonymous    | 0 | 2 |
| PCDH7    | chr4  | 30725886/T//G   | nonsynonymous | 0 | 2 |
| GABRA2   | chr4  | 46307639/G//T   | nonsynonymous | 0 | 2 |
| KIT      | chr4  | 55598083/C//T   | synonymous    | 0 | 2 |
| PDLIM5   | chr4  | 95561456/G//A   | nonsynonymous | 0 | 2 |
| MTTP     | chr4  | 100530028/A//G  | nonsynonymous | 0 | 2 |
| UGT3A2   | chr5  | 36039725/G//A   | nonsynonymous | 0 | 2 |
| ANKHD1   | chr5  | 139876627/A//G  | nonsynonymous | 0 | 2 |
| TAPBP    | chr6  | 33272828/T//A   | nonsynonymous | 0 | 2 |
| KCNK16   | chr6  | 39284616/C//T   | synonymous    | 0 | 2 |
| RIPPLY2  | chr6  | 84567190/A//C   | synonymous    | 0 | 2 |
| CLVS2    | chr6  | 123332274/T//C  | synonymous    | 0 | 2 |
| PLEKHG1  | chr6  | 151152350/C//T  | synonymous    | 0 | 2 |
| FNDC1    | chr6  | 159654059/C//T  | nonsynonymous | 0 | 2 |
| TMEM184A | chr7  | 1587403/G//A    | synonymous    | 0 | 2 |
| BBS9     | chr7  | 33644866/A//C   | synonymous    | 0 | 2 |
| GLI3     | chr7  | 42116391/G//A   | nonsynonymous | 0 | 2 |
| STYXL1   | chr7  | 75633169/C//A   | nonsynonymous | 0 | 2 |
| MAGI2    | chr7  | 77649177/C//A   | nonsynonymous | 0 | 2 |
| SLC35B4  | chr7  | 133985017/A//T  | synonymous    | 0 | 2 |
| ZNF212   | chr7  | 148951454/G//A  | nonsynonymous | 0 | 2 |
| ZDHHC2   | chr8  | 17014363/G//A   | nonsynonymous | 0 | 2 |
| ZBTB10   | chr8  | 81411760/G//A   | nonsynonymous | 0 | 2 |
| ATAD2    | chr8  | 124408638/G//T  | synonymous    | 0 | 2 |
| ADGRB1   | chr8  | 143623483/C//T  | synonymous    | 0 | 2 |
| VDLDR    | chr9  | 2648762/A//AATG | nonsynonymous | 0 | 2 |
| DENND4C  | chr9  | 19298088/C//G   | nonsynonymous | 0 | 2 |
| PHF2     | chr9  | 96392283/G//A   | nonsynonymous | 0 | 2 |
| INVS     | chr9  | 103054690/A//G  | synonymous    | 0 | 2 |
| DNAJC25  | chr9  | 114409525/A//G  | nonsynonymous | 0 | 2 |
| CNTRL    | chr9  | 123920255/T//G  | synonymous    | 0 | 2 |
| CDH23    | chr10 | 73567085/G//A   | nonsynonymous | 0 | 2 |
| TLL2     | chr10 | 98156991/G//A   | nonsynonymous | 0 | 2 |
| CRTAC1   | chr10 | 99644052/G//A   | nonsynonymous | 0 | 2 |
| OR56A5   | chr11 | 5989467/G//T    | synonymous    | 0 | 2 |
| RBMXL2   | chr11 | 7110710/G//A    | nonsynonymous | 0 | 2 |
| SAC3D1   | chr11 | 64811905/C//T   | synonymous    | 0 | 2 |
| PITPNM1  | chr11 | 67266278/C//T   | nonsynonymous | 0 | 2 |
| COLCA2   | chr11 | 111179125/A//AC | nonsynonymous | 0 | 2 |
| TMPRSS4  | chr11 | 117975524/G//T  | nonsynonymous | 0 | 2 |
| MFRP     | chr11 | 119216505/G//A  | synonymous    | 0 | 2 |
| CDON     | chr11 | 125889541/G//A  | nonsynonymous | 0 | 2 |
| HOXC12   | chr12 | 54349055/C//T   | synonymous    | 0 | 2 |
| ERBB3    | chr12 | 56493467/A//G   | nonsynonymous | 0 | 2 |
| APOF     | chr12 | 56755430/G//T   | nonsynonymous | 0 | 2 |

|           |       |                |               |   |   |
|-----------|-------|----------------|---------------|---|---|
| ATP6V1D   | chr14 | 67812546/G//C  | nonsynonymous | 0 | 2 |
| PDCD7     | chr15 | 65421421/G//A  | nonsynonymous | 0 | 2 |
| CLCN7     | chr16 | 1501651/C//T   | nonsynonymous | 0 | 2 |
| CRAMP1    | chr16 | 1720713/T//C   | nonsynonymous | 0 | 2 |
| UBN1      | chr16 | 4924674/C//A   | nonsynonymous | 0 | 2 |
| RBFOX1    | chr16 | 7568246/C//T   | nonsynonymous | 0 | 2 |
| HERPUD1   | chr16 | 56977104/G//A  | nonsynonymous | 0 | 2 |
| TP53      | chr17 | 7577556/C//A   | nonsynonymous | 0 | 2 |
| CCDC144NL | chr17 | 20769896/G//T  | nonsynonymous | 0 | 2 |
| IGF2BP1   | chr17 | 47115724/G//A  | nonsynonymous | 0 | 2 |
| COL1A1    | chr17 | 48278906/G//A  | synonymous    | 0 | 2 |
| KDM4B     | chr19 | 5135544/C//T   | synonymous    | 0 | 2 |
| F2RL3     | chr19 | 17000917/C//T  | nonsynonymous | 0 | 2 |
| ZNF429    | chr19 | 21720592/C//T  | synonymous    | 0 | 2 |
| JAG1      | chr20 | 10654282/C//T  | synonymous    | 0 | 2 |
| OSER1     | chr20 | 42826029/T//C  | nonsynonymous | 0 | 2 |
| ARFGEF2   | chr20 | 47626798/G//A  | nonsynonymous | 0 | 2 |
| KLHL34    | chrX  | 21675315/C//A  | nonsynonymous | 0 | 2 |
| PHKA1     | chrX  | 71856166/G//C  | synonymous    | 0 | 2 |
| PCDH9     | chr13 | 67799594/G//T  | synonymous    | 0 | 2 |
| PIGT      | chr20 | 44047976/G//C  | nonsynonymous | 0 | 2 |
| RSPH1     | chr21 | 43913111/C//T  | nonsynonymous | 0 | 2 |
| SPAST     | chr2  | 32379522/C//A  | nonsynonymous | 0 | 2 |
| CXCR4     | chr2  | 136873174/T//C | synonymous    | 0 | 2 |
| BCL6      | chr3  | 187440347/G//A | nonsynonymous | 0 | 2 |
| PRDM9     | chr5  | 23509680/C//A  | nonsynonymous | 0 | 2 |
| CAPSL     | chr5  | 35910537/T//G  | nonsynonymous | 0 | 2 |
| CUX1      | chr7  | 101821870/G//A | nonsynonymous | 0 | 2 |
| CPA4      | chr7  | 129938672/C//T | synonymous    | 0 | 2 |
| HTRA4     | chr8  | 38832000/C//T  | nonsynonymous | 0 | 2 |
| POTEA     | chr8  | 43159856/T//A  | nonsynonymous | 0 | 2 |
| BTBD16    | chr10 | 124091981/A//G | nonsynonymous | 0 | 2 |
| ERN2      | chr16 | 23716404/C//T  | synonymous    | 0 | 2 |
| CLTC      | chr17 | 57743971/G//A  | nonsynonymous | 0 | 2 |
| ANKRD30B  | chr18 | 14799236/G//A  | synonymous    | 0 | 2 |
| PLPPR3    | chr19 | 813060/G//A    | nonsynonymous | 0 | 2 |
| KLK6      | chr19 | 51462454/G//A  | nonsynonymous | 0 | 2 |
| SUN2      | chr22 | 39138431/G//A  | nonsynonymous | 0 | 2 |
| ELK1      | chrX  | 47500745/A//G  | synonymous    | 0 | 2 |
| PDE6B     | chr4  | 629753/G//A    | nonsynonymous | 0 | 2 |
| KLF3      | chr4  | 38690317/A//T  | nonsynonymous | 0 | 2 |
| HADH      | chr4  | 108955528/G//A | synonymous    | 0 | 2 |
| OXCT1     | chr5  | 41870549/G//A  | synonymous    | 0 | 2 |
| FER       | chr5  | 108516573/A//G | nonsynonymous | 0 | 2 |
| APC       | chr5  | 112175207/G//T | nonsynonymous | 0 | 2 |
| CACNA2D1  | chr7  | 81601133/T//C  | nonsynonymous | 0 | 2 |
| CCKBR     | chr11 | 6291485/G//A   | nonsynonymous | 0 | 2 |
| LPCAT4    | chr15 | 34652309/T//C  | synonymous    | 0 | 2 |
| TELO2     | chr16 | 1552070/G//A   | nonsynonymous | 0 | 2 |
| MVP       | chr16 | 29845144/G//T  | nonsynonymous | 0 | 2 |
| NUDC      | chr1  | 27268066/A//G  | nonsynonymous | 0 | 2 |
| ZBTB8B    | chr1  | 32936869/C//T  | nonsynonymous | 0 | 2 |
| ADORA3    | chr1  | 112043018/C//T | nonsynonymous | 0 | 2 |
| CD58      | chr1  | 117086952/C//T | synonymous    | 0 | 2 |
| FLG       | chr1  | 152286419/C//A | nonsynonymous | 0 | 2 |
| PROX1     | chr1  | 214171387/C//T | synonymous    | 0 | 2 |
| SNAP47    | chr1  | 227935417/C//T | nonsynonymous | 0 | 2 |
| NBAS      | chr2  | 15608557/C//T  | nonsynonymous | 0 | 2 |
| KLHL29    | chr2  | 23785133/G//A  | nonsynonymous | 0 | 2 |
| ADCY3     | chr2  | 25141311/C//T  | synonymous    | 0 | 2 |
| ADGRF3    | chr2  | 26541791/G//A  | nonsynonymous | 0 | 2 |
| LRP1B     | chr2  | 141215226/A//G | synonymous    | 0 | 2 |
| UNC80     | chr2  | 210769562/T//A | nonsynonymous | 0 | 2 |
| FAM198A   | chr3  | 43074964/C//T  | synonymous    | 0 | 2 |
| PRSS42    | chr3  | 46875371/C//T  | nonsynonymous | 0 | 2 |
| GLYCTK    | chr3  | 52324719/G//C  | nonsynonymous | 0 | 2 |
| FAM3D     | chr3  | 58622103/G//A  | nonsynonymous | 0 | 2 |
| MINA      | chr3  | 97666283/T//C  | synonymous    | 0 | 2 |
| IMPG2     | chr3  | 100948296/G//A | synonymous    | 0 | 2 |
| PARP9     | chr3  | 122274384/G//T | nonsynonymous | 0 | 2 |

|           |       |                |               |   |   |
|-----------|-------|----------------|---------------|---|---|
| EPHB1     | chr3  | 134960061/C//T | synonymous    | 0 | 2 |
| NPFFR2    | chr4  | 73013287/C//T  | nonsynonymous | 0 | 2 |
| PDHA2     | chr4  | 96762158/G//A  | nonsynonymous | 0 | 2 |
| TBC1D9    | chr4  | 141543544/G//T | nonsynonymous | 0 | 2 |
| TENM3     | chr4  | 183713754/C//T | synonymous    | 0 | 2 |
| SRD5A1    | chr5  | 6652042/C//T   | synonymous    | 0 | 2 |
| TRIO      | chr5  | 14316767/G//A  | nonsynonymous | 0 | 2 |
| YTHDC2    | chr5  | 112901657/C//G | nonsynonymous | 0 | 2 |
|           | chr5  | 114632120/T//G | synonymous    | 0 | 2 |
| PCDHA2    | chr5  | 140176640/C//T | synonymous    | 0 | 2 |
|           | chr5  | 146728358/C//T | synonymous    | 0 | 2 |
| HK3       | chr5  | 176314293/C//T | nonsynonymous | 0 | 2 |
| ADAMTS2   | chr5  | 178562961/C//T | synonymous    | 0 | 2 |
| PRL       | chr6  | 22297215/C//T  | synonymous    | 0 | 2 |
| POM121L2  | chr6  | 27279113/G//A  | synonymous    | 0 | 2 |
| DHX16     | chr6  | 30624192/G//A  | synonymous    | 0 | 2 |
| TBC1D22B  | chr6  | 37250092/C//T  | nonsynonymous | 0 | 2 |
| KCNK17    | chr6  | 39271757/C//T  | nonsynonymous | 0 | 2 |
| RSPH9     | chr6  | 43612811/G//T  | synonymous    | 0 | 2 |
| RIMS1     | chr6  | 72960935/G//A  | synonymous    | 0 | 2 |
| ADGB      | chr6  | 147106810/C//T | nonsynonymous | 0 | 2 |
| AMZ1      | chr7  | 2740104/G//A   | nonsynonymous | 0 | 2 |
| WIPF3     | chr7  | 29928974/G//A  | synonymous    | 0 | 2 |
| AMPH      | chr7  | 38543261/G//T  | nonsynonymous | 0 | 2 |
| PKD1L1    | chr7  | 47874739/G//T  | nonsynonymous | 0 | 2 |
| GNAI1     | chr7  | 79764428/C//A  | synonymous    | 0 | 2 |
| SAMD9     | chr7  | 92735052/G//T  | nonsynonymous | 0 | 2 |
| PENK      | chr8  | 57354307/A//G  | nonsynonymous | 0 | 2 |
| UBR5      | chr8  | 103282298/C//A | nonsynonymous | 0 | 2 |
| PKHD1L1   | chr8  | 110445349/G//A | nonsynonymous | 0 | 2 |
| LHX6      | chr9  | 124979499/C//T | nonsynonymous | 0 | 2 |
| TLX1      | chr10 | 102894092/G//A | synonymous    | 0 | 2 |
| FANK1     | chr10 | 127697794/G//A | nonsynonymous | 0 | 2 |
| OR52N1    | chr11 | 5809405/C//T   | synonymous    | 0 | 2 |
| TRIM66    | chr11 | 8670079/G//A   | synonymous    | 0 | 2 |
| ABTB2     | chr11 | 34218942/G//A  | nonsynonymous | 0 | 2 |
| CHST1     | chr11 | 45672089/C//T  | nonsynonymous | 0 | 2 |
| OR4A5     | chr11 | 51412094/A//G  | nonsynonymous | 0 | 2 |
| SLC43A3   | chr11 | 57182516/C//T  | nonsynonymous | 0 | 2 |
| DDB1      | chr11 | 61097512/G//A  | nonsynonymous | 0 | 2 |
| KDM2A     | chr11 | 67021716/G//A  | nonsynonymous | 0 | 2 |
| FAT3      | chr11 | 92615929/G//A  | nonsynonymous | 0 | 2 |
| FAT3      | chr11 | 92616282/C//T  | synonymous    | 0 | 2 |
| ETV6      | chr12 | 12038862/C//T  | synonymous    | 0 | 2 |
| KMT2D     | chr12 | 49432374/C//T  | nonsynonymous | 0 | 2 |
| MBD6      | chr12 | 57918174/C//T  | nonsynonymous | 0 | 2 |
| CUX2      | chr12 | 111758427/G//A | nonsynonymous | 0 | 2 |
| HECTD4    | chr12 | 112638577/G//A | nonsynonymous | 0 | 2 |
| SRRM4     | chr12 | 119591395/G//A | synonymous    | 0 | 2 |
| HOMEZ     | chr14 | 23746402/A//G  | synonymous    | 0 | 2 |
| FANCM     | chr14 | 45636243/C//T  | nonsynonymous | 0 | 2 |
| ESRRB     | chr14 | 76948385/G//A  | nonsynonymous | 0 | 2 |
| C14orf177 | chr14 | 99183533/G//A  | synonymous    | 0 | 2 |
| CDC42BPB  | chr14 | 103452870/C//T | nonsynonymous | 0 | 2 |
| KIF26A    | chr14 | 104643443/C//T | nonsynonymous | 0 | 2 |
| ADAMTS7   | chr15 | 79056391/C//T  | synonymous    | 0 | 2 |
| TM2D3     | chr15 | 102187102/C//A | nonsynonymous | 0 | 2 |
| PKD1      | chr16 | 2162830/C//T   | synonymous    | 0 | 2 |
| ANKS3     | chr16 | 4777146/C//T   | nonsynonymous | 0 | 2 |
| ACSM2A    | chr16 | 20494386/A//G  | nonsynonymous | 0 | 2 |
| HIC1      | chr17 | 1961343/G//A   | synonymous    | 0 | 2 |
| KRTAP9-8  | chr17 | 39394729/C//A  | synonymous    | 0 | 2 |
| KRT31     | chr17 | 39551196/C//T  | nonsynonymous | 0 | 2 |
| ITGA3     | chr17 | 48158698/C//T  | nonsynonymous | 0 | 2 |
| KIF19     | chr17 | 72344009/G//A  | nonsynonymous | 0 | 2 |
| ANKRD24   | chr19 | 4207949/C//A   | synonymous    | 0 | 2 |
| ADAMTS10  | chr19 | 8665945/C//T   | nonsynonymous | 0 | 2 |
| HAPLN4    | chr19 | 19369541/C//T  | nonsynonymous | 0 | 2 |
| PSG8      | chr19 | 43268101/C//G  | nonsynonymous | 0 | 2 |
| CCDC9     | chr19 | 47774873/C//T  | nonsynonymous | 0 | 2 |

|          |       |                   |               |   |   |
|----------|-------|-------------------|---------------|---|---|
| ZNF551   | chr19 | 58199242/C//T     | synonymous    | 0 | 2 |
| NCOA6    | chr20 | 33338036/C//T     | synonymous    | 0 | 2 |
| SALL4    | chr20 | 50405552/G//A     | nonsynonymous | 0 | 2 |
| NELFCD   | chr20 | 57568575/C//G     | nonsynonymous | 0 | 2 |
| LAMA5    | chr20 | 60888729/G//A     | synonymous    | 0 | 2 |
| TMPRSS15 | chr21 | 19744536/C//T     | nonsynonymous | 0 | 2 |
| G6PD     | chrX  | 153761236/G//A    | synonymous    | 0 | 2 |
| SNX20    | chr16 | 50707501/C//T     | nonsynonymous | 0 | 2 |
| CHD5     | chr1  | 6196810/C//T      | nonsynonymous | 0 | 2 |
| TTN      | chr2  | 179404285/C//T    | nonsynonymous | 0 | 2 |
| RAB17    | chr2  | 238484117/T//C    | nonsynonymous | 0 | 2 |
| RACK1    | chr5  | 180664719/C//T    | nonsynonymous | 0 | 2 |
| CUL9     | chr6  | 43152296/G//A     | nonsynonymous | 0 | 2 |
| COBL     | chr7  | 51092803/C//T     | synonymous    | 0 | 2 |
| DYNC111  | chr7  | 95668627/G//A     | nonsynonymous | 0 | 2 |
| ZNF800   | chr7  | 127017360/A//C    | nonsynonymous | 0 | 2 |
| APBB1    | chr11 | 6424589/GTTCC//G  | nonsynonymous | 0 | 2 |
| ZNF839   | chr14 | 102793047/C//T    | synonymous    | 0 | 2 |
| ADAMTS7  | chr15 | 79054835/C//T     | nonsynonymous | 0 | 2 |
| SPATA8   | chr15 | 97326860/G//T     | synonymous    | 0 | 2 |
| NARFL    | chr16 | 780891/G//A       | nonsynonymous | 0 | 2 |
| BRD7     | chr16 | 50353064/T//A     | synonymous    | 0 | 2 |
| BRD7     | chr16 | 50357579/A//C     | nonsynonymous | 0 | 2 |
| CBFA2T3  | chr16 | 88947724/G//A     | synonymous    | 0 | 2 |
| SPDYE4   | chr17 | 8661684/G//A      | nonsynonymous | 0 | 2 |
| ZNF444   | chr19 | 56671341/G//T     | nonsynonymous | 0 | 2 |
| IGSF21   | chr1  | 18692039/G//A     | nonsynonymous | 0 | 2 |
| IGSF21   | chr1  | 18692064/C//T     | synonymous    | 0 | 2 |
| UBR4     | chr1  | 19441439/T//C     | nonsynonymous | 0 | 2 |
| LRRC41   | chr1  | 46751567/C//T     | nonsynonymous | 0 | 2 |
| WDR47    | chr1  | 109517338/G//A    | nonsynonymous | 0 | 2 |
| ALX3     | chr1  | 110613093/G//A    | synonymous    | 0 | 2 |
| AMPD1    | chr1  | 115220069/G//A    | nonsynonymous | 0 | 2 |
| CD101    | chr1  | 117561057/C//A    | nonsynonymous | 0 | 2 |
| BRINP3   | chr1  | 190067182/G//T    | nonsynonymous | 0 | 2 |
| B3GALT2  | chr1  | 193150445/C//G    | nonsynonymous | 0 | 2 |
| KDM5B    | chr1  | 202742324/T//G    | synonymous    | 0 | 2 |
| USH2A    | chr1  | 215987195/C//T    | nonsynonymous | 0 | 2 |
| ESRRG    | chr1  | 216850601/C//A    | nonsynonymous | 0 | 2 |
| TPO      | chr2  | 1507848/G//A      | nonsynonymous | 0 | 2 |
| PPP1R21  | chr2  | 48698330/A//T     | synonymous    | 0 | 2 |
| MBD5     | chr2  | 149225950/A//G    | synonymous    | 0 | 2 |
| PKP4     | chr2  | 159499208/A//T    | nonsynonymous | 0 | 2 |
| FSIP2    | chr2  | 186669608/A//G    | nonsynonymous | 0 | 2 |
| TNS1     | chr2  | 218750822/G//A    | nonsynonymous | 0 | 2 |
| EPHA3    | chr3  | 89445005/C//T     | nonsynonymous | 0 | 2 |
| GPR15    | chr3  | 98251720/G//T     | nonsynonymous | 0 | 2 |
| ARHGAP31 | chr3  | 119121047/C//T    | nonsynonymous | 0 | 2 |
| MED12L   | chr3  | 150883648/G//A    | nonsynonymous | 0 | 2 |
| KCNAB1   | chr3  | 155838523/C//T    | synonymous    | 0 | 2 |
| LEKR1    | chr3  | 156763371/C//T    | synonymous    | 0 | 2 |
| FRYL     | chr4  | 48530060/T//C     | synonymous    | 0 | 2 |
| EPHA5    | chr4  | 66535467/C//T     | synonymous    | 0 | 2 |
| UNC5C    | chr4  | 96090536/A//G     | nonsynonymous | 0 | 2 |
| FAT4     | chr4  | 126371717/A//T    | synonymous    | 0 | 2 |
|          | chr4  | 155411154/C//A    | synonymous    | 0 | 2 |
| RWDD4    | chr4  | 184562624/A//G    | nonsynonymous | 0 | 2 |
| F11      | chr4  | 187197491/C//T    | synonymous    | 0 | 2 |
| LIFR     | chr5  | 38484884/G//A     | nonsynonymous | 0 | 2 |
| HCN1     | chr5  | 45645392/G//T     | nonsynonymous | 0 | 2 |
| BDP1     | chr5  | 70806438/G//C     | nonsynonymous | 0 | 2 |
| APC      | chr5  | 112174177/T//A//T | nonsynonymous | 0 | 2 |
| PCDHA3   | chr5  | 140182318/G//A    | synonymous    | 0 | 2 |
| PCDHA9   | chr5  | 140228407/C//T    | synonymous    | 0 | 2 |
| PCDHA10  | chr5  | 140237259/G//A    | synonymous    | 0 | 2 |
| PCDHB6   | chr5  | 140529815/C//A    | synonymous    | 0 | 2 |
| SLC6A7   | chr5  | 149581903/G//A    | synonymous    | 0 | 2 |
| CLK4     | chr5  | 178045718/C//T    | nonsynonymous | 0 | 2 |
| FLT4     | chr5  | 180048002/C//T    | nonsynonymous | 0 | 2 |
| CUL7     | chr6  | 43011249/G//A     | nonsynonymous | 0 | 2 |

|          |       |                  |               |   |   |
|----------|-------|------------------|---------------|---|---|
| DSE      | chr6  | 116757926/G//A   | synonymous    | 0 | 2 |
| FAM162B  | chr6  | 117086602/G//A   | synonymous    | 0 | 2 |
| SYNE1    | chr6  | 152497562/C//T   | nonsynonymous | 0 | 2 |
| SYNE1    | chr6  | 152697579/G//A   | synonymous    | 0 | 2 |
| DPY19L1  | chr7  | 34989453/A//C    | nonsynonymous | 0 | 2 |
| GLI3     | chr7  | 42065984/G//A    | synonymous    | 0 | 2 |
| ABCA13   | chr7  | 48559764/T//G    | nonsynonymous | 0 | 2 |
| CAV1     | chr7  | 116199133/C//T   | nonsynonymous | 0 | 2 |
| PTPRZ1   | chr7  | 121513546/G//A   | synonymous    | 0 | 2 |
| AGBL3    | chr7  | 134800209/G//T   | nonsynonymous | 0 | 2 |
| OR2A12   | chr7  | 143792935/C//T   | synonymous    | 0 | 2 |
| HTR5A    | chr7  | 154863255/G//T   | nonsynonymous | 0 | 2 |
| TEX15    | chr8  | 30703039/C//A    | nonsynonymous | 0 | 2 |
| COL14A1  | chr8  | 121357691/C//G   | nonsynonymous | 0 | 2 |
| TRAPPC9  | chr8  | 141231563/C//T   | nonsynonymous | 0 | 2 |
| ZNF7     | chr8  | 146068289/C//A   | nonsynonymous | 0 | 2 |
| APTX     | chr9  | 32987592/C//T    | nonsynonymous | 0 | 2 |
| TUBAL3   | chr10 | 5435603/G//A     | synonymous    | 0 | 2 |
| SH2D4B   | chr10 | 82363362/AGAG//A | nonsynonymous | 0 | 2 |
| CCDC172  | chr10 | 118084602/G//T   | nonsynonymous | 0 | 2 |
| VENTX    | chr10 | 135053512/C//T   | nonsynonymous | 0 | 2 |
| NDUFV1   | chr11 | 67379444/G//A    | nonsynonymous | 0 | 2 |
| P2RY2    | chr11 | 72945859/G//A    | nonsynonymous | 0 | 2 |
| FGF23    | chr12 | 4479673/G//A     | nonsynonymous | 0 | 2 |
| KCNA1    | chr12 | 5020842/G//A     | nonsynonymous | 0 | 2 |
| C1S      | chr12 | 7177603/G//A     | nonsynonymous | 0 | 2 |
| DDX47    | chr12 | 12974984/C//T    | synonymous    | 0 | 2 |
| TMEM117  | chr12 | 44605125/C//A    | nonsynonymous | 0 | 2 |
| OR6C75   | chr12 | 55758935/G//T    | nonsynonymous | 0 | 2 |
| LRRIQ1   | chr12 | 85521745/G//T    | nonsynonymous | 0 | 2 |
| ANKS1B   | chr12 | 100219128/C//T   | synonymous    | 0 | 2 |
| CHFR     | chr12 | 133438211/C//A   | nonsynonymous | 0 | 2 |
| DCLK1    | chr13 | 36413245/G//A    | synonymous    | 0 | 2 |
| SLITRK5  | chr13 | 88327927/G//A    | nonsynonymous | 0 | 2 |
| VRTN     | chr14 | 74823784/C//T    | nonsynonymous | 0 | 2 |
| LTBP2    | chr14 | 74970002/C//T    | nonsynonymous | 0 | 2 |
| DYNC1H1  | chr14 | 102502890/C//T   | nonsynonymous | 0 | 2 |
| MGA      | chr15 | 42028600/C//T    | nonsynonymous | 0 | 2 |
| IGDCC3   | chr15 | 65622066/G//A    | synonymous    | 0 | 2 |
| DPP8     | chr15 | 65744385/G//A    | nonsynonymous | 0 | 2 |
| FES      | chr15 | 91428690/C//T    | nonsynonymous | 0 | 2 |
| TARSL2   | chr15 | 102198059/G//A   | nonsynonymous | 0 | 2 |
| AXIN1    | chr16 | 396719/T//C      | nonsynonymous | 0 | 2 |
| MAPK8IP3 | chr16 | 1797267/G//A     | nonsynonymous | 0 | 2 |
| ZSCAN10  | chr16 | 3140023/G//A     | nonsynonymous | 0 | 2 |
| PLK1     | chr16 | 23700947/G//A    | nonsynonymous | 0 | 2 |
| IL21R    | chr16 | 27460570/C//T    | nonsynonymous | 0 | 2 |
| PRMT7    | chr16 | 68373447/G//A    | nonsynonymous | 0 | 2 |
| SSH2     | chr17 | 28256967/G//A    | nonsynonymous | 0 | 2 |
| SLFN11   | chr17 | 33680060/C//T    | nonsynonymous | 0 | 2 |
| PIGW     | chr17 | 34894465/A//T    | nonsynonymous | 0 | 2 |
| PHOSPHO1 | chr17 | 47304107/G//A    | synonymous    | 0 | 2 |
| DNAH17   | chr17 | 76462822/G//A    | nonsynonymous | 0 | 2 |
| CBX4     | chr17 | 77808437/A//ACC  | nonsynonymous | 0 | 2 |
| MIB1     | chr18 | 19438593/G//A    | nonsynonymous | 0 | 2 |
| NETO1    | chr18 | 70416243/G//T    | synonymous    | 0 | 2 |
| TSHZ1    | chr18 | 72999127/G//A    | nonsynonymous | 0 | 2 |
| IL27RA   | chr19 | 14142779/C//T    | nonsynonymous | 0 | 2 |
| RAB3A    | chr19 | 18313455/G//A    | synonymous    | 0 | 2 |
| CHST8    | chr19 | 34180099/G//A    | synonymous    | 0 | 2 |
| RBM42    | chr19 | 36125212/C//T    | nonsynonymous | 0 | 2 |
| EPN1     | chr19 | 56196963/C//T    | nonsynonymous | 0 | 2 |
| ZNF586   | chr19 | 58281225/C//T    | synonymous    | 0 | 2 |
| ZNF8     | chr19 | 58806380/C//T    | synonymous    | 0 | 2 |
| CST9L    | chr20 | 23549134/G//T    | synonymous    | 0 | 2 |
| ZNF341   | chr20 | 32379218/C//T    | synonymous    | 0 | 2 |
| PTPRT    | chr20 | 40739064/C//T    | nonsynonymous | 0 | 2 |
| PKNOX1   | chr21 | 44438310/G//A    | synonymous    | 0 | 2 |
|          | chr22 | 24226126/T//C    | synonymous    | 0 | 2 |
| SEC14L6  | chr22 | 30925140/C//T    | nonsynonymous | 0 | 2 |



|                |       |                |               |   |   |
|----------------|-------|----------------|---------------|---|---|
| TCN2           | chr22 | 31022498/T//C  | nonsynonymous | 0 | 2 |
| MOV10L1        | chr22 | 50555696/G//A  | nonsynonymous | 0 | 2 |
| SBF1           | chr22 | 50903000/G//A  | synonymous    | 0 | 2 |
| FAM9B          | chrX  | 8995925/C//T   | nonsynonymous | 0 | 2 |
| SHROOM2        | chrX  | 9863072/C//T   | nonsynonymous | 0 | 2 |
| TCEANC         | chrX  | 13681651/C//A  | nonsynonymous | 0 | 2 |
| NLGN3          | chrX  | 70367694/C//T  | nonsynonymous | 0 | 2 |
| OGT            | chrX  | 70787871/A//T  | synonymous    | 0 | 2 |
| ARMCX5-GPRASP2 | chrX  | 101970352/C//A | synonymous    | 0 | 2 |
| AMOT           | chrX  | 112024138/C//T | nonsynonymous | 0 | 2 |
| DCAF12L2       | chrX  | 125298905/G//A | nonsynonymous | 0 | 2 |
| DCAF12L2       | chrX  | 125299462/C//A | nonsynonymous | 0 | 2 |
| MAGEC2         | chrX  | 141291741/G//A | synonymous    | 0 | 2 |
| OPN1LW         | chrX  | 153416302/C//T | nonsynonymous | 0 | 2 |
| AURKAIP1       | chr1  | 1309158/G//A   | synonymous    | 1 | 1 |
| LRRC4C         | chr11 | 40137642/C//T  | synonymous    | 1 | 1 |
| ZNF208         | chr19 | 22155847/C//T  | synonymous    | 1 | 1 |
| KRTAP10-1      | chr21 | 45959195/G//A  | nonsynonymous | 1 | 1 |
| MUC17          | chr7  | 100677606/G//T | nonsynonymous | 1 | 1 |
| DENND1B        | chr1  | 197576309/A//T | synonymous    | 0 | 2 |
|                | chr18 | 51729257/A//T  | synonymous    | 1 | 1 |
| TP53           | chr17 | 7578437/G//A   | nonsynonymous | 2 | 0 |
| ZNF100         | chr19 | 21909767/C//T  | nonsynonymous | 1 | 1 |
| CORT           | chr1  | 10510240/G//A  | synonymous    | 0 | 2 |
| MAD2L2         | chr1  | 11740666/G//A  | synonymous    | 0 | 2 |
| PRAMEF1        | chr1  | 12855771/C//T  | nonsynonymous | 0 | 2 |
| PADI6          | chr1  | 17721460/G//A  | nonsynonymous | 0 | 2 |
| WASF2          | chr1  | 27744798/G//A  | nonsynonymous | 0 | 2 |
| ZMYM4          | chr1  | 35852842/G//A  | nonsynonymous | 0 | 2 |
| DMAP1          | chr1  | 44684871/C//T  | synonymous    | 0 | 2 |
| ZYG11B         | chr1  | 53279314/T//C  | nonsynonymous | 0 | 2 |
| S1PR1          | chr1  | 101705353/G//A | synonymous    | 0 | 2 |
| S1PR1          | chr1  | 101705554/C//A | synonymous    | 0 | 2 |
| SLC6A17        | chr1  | 110714803/T//C | synonymous    | 0 | 2 |
| AMPD1          | chr1  | 115220643/C//T | nonsynonymous | 0 | 2 |
| FLG            | chr1  | 152281866/C//T | synonymous    | 0 | 2 |
| C1orf68        | chr1  | 152692474/T//C | synonymous    | 0 | 2 |
| SPTA1          | chr1  | 158592788/C//A | nonsynonymous | 0 | 2 |
| VANGL2         | chr1  | 160385613/C//T | synonymous    | 0 | 2 |
| OLFML2B        | chr1  | 161970098/C//T | nonsynonymous | 0 | 2 |
| SELP           | chr1  | 169582887/C//T | nonsynonymous | 0 | 2 |
| DHX9           | chr1  | 182827934/C//T | nonsynonymous | 0 | 2 |
| RGL1           | chr1  | 183881267/G//T | nonsynonymous | 0 | 2 |
| TRMT1L         | chr1  | 185109148/T//C | nonsynonymous | 0 | 2 |
| KIF21B         | chr1  | 200961481/G//A | nonsynonymous | 0 | 2 |
| HHIPL2         | chr1  | 222717195/C//T | nonsynonymous | 0 | 2 |
| TRIM67         | chr1  | 231351191/G//A | synonymous    | 0 | 2 |
| RYR2           | chr1  | 237713957/C//T | synonymous    | 0 | 2 |
| GREM2          | chr1  | 240656232/G//A | synonymous    | 0 | 2 |
| RGS7           | chr1  | 240977013/C//T | synonymous    | 0 | 2 |
| DNMT3A         | chr2  | 25536876/G//A  | synonymous    | 0 | 2 |
| GALNT14        | chr2  | 31361028/G//A  | synonymous    | 0 | 2 |
| MTHFD2         | chr2  | 74425827/G//T  | nonsynonymous | 0 | 2 |
| CNTNAP5        | chr2  | 125192210/G//T | nonsynonymous | 0 | 2 |
| LCT            | chr2  | 136566318/G//A | nonsynonymous | 0 | 2 |
| LOC100507600   | chr2  | 136579779/G//T | synonymous    | 0 | 2 |
| SCN1A          | chr2  | 166848284/G//A | nonsynonymous | 0 | 2 |
|                | chr2  | 188343388/C//T | synonymous    | 0 | 2 |
| DNAH7          | chr2  | 196636445/C//T | nonsynonymous | 0 | 2 |
| B3GNT7         | chr2  | 232262715/G//T | nonsynonymous | 0 | 2 |
| NCL            | chr2  | 232321417/T//C | nonsynonymous | 0 | 2 |
| ESPNL          | chr2  | 239039954/G//A | nonsynonymous | 0 | 2 |
| KLHL30         | chr2  | 239059766/C//T | synonymous    | 0 | 2 |
| MKRN2          | chr3  | 12613749/C//T  | synonymous    | 0 | 2 |
| UBE2E2         | chr3  | 23631313/C//T  | synonymous    | 0 | 2 |
| EOMES          | chr3  | 27763030/G//A  | synonymous    | 0 | 2 |
| GLB1           | chr3  | 33114035/C//T  | nonsynonymous | 0 | 2 |
| SCN5A          | chr3  | 38628912/C//T  | synonymous    | 0 | 2 |
| PTPRG          | chr3  | 62248483/G//A  | nonsynonymous | 0 | 2 |
| ROBO2          | chr3  | 77629269/G//A  | nonsynonymous | 0 | 2 |

|           |       |                        |               |   |   |
|-----------|-------|------------------------|---------------|---|---|
| CHRD      | chr3  | 184104393/G//T         | synonymous    | 0 | 2 |
| PIGG      | chr4  | 517656/G//A            | nonsynonymous | 0 | 2 |
| FGFRL1    | chr4  | 1016268/G//T           | synonymous    | 0 | 2 |
| C1QTNF7   | chr4  | 15437568/C//T          | synonymous    | 0 | 2 |
| FAM184B   | chr4  | 17710912/G//A          | nonsynonymous | 0 | 2 |
| SLIT2     | chr4  | 20259563/G//T          | nonsynonymous | 0 | 2 |
| PCDH7     | chr4  | 30725822/A//G          | synonymous    | 0 | 2 |
| TMPRSS11A | chr4  | 68789839/GACTT//G      | synonymous    | 0 | 2 |
| TMPRSS11B | chr4  | 69111344/C//T          | synonymous    | 0 | 2 |
| NUDT9     | chr4  | 88370379/G//C          | nonsynonymous | 0 | 2 |
| SPARCL1   | chr4  | 88415280/C//A          | nonsynonymous | 0 | 2 |
| FAT4      | chr4  | 126367473/C//G         | nonsynonymous | 0 | 2 |
| FSTL5     | chr4  | 162307369/C//A         | nonsynonymous | 0 | 2 |
| FSTL5     | chr4  | 162380374/G//T         | nonsynonymous | 0 | 2 |
| ADAMTS16  | chr5  | 5186351/C//T           | nonsynonymous | 0 | 2 |
| PRDM9     | chr5  | 23522805/C//A          | nonsynonymous | 0 | 2 |
| CDH9      | chr5  | 26881404/C//T          | synonymous    | 0 | 2 |
| NIPBL     | chr5  | 36985548/G//A          | nonsynonymous | 0 | 2 |
| PCDHB11   | chr5  | 140580101/C//T         | nonsynonymous | 0 | 2 |
|           | chr5  | 140871326/G//A         | synonymous    | 0 | 2 |
| PPP2R2B   | chr5  | 146030186/G//T         | nonsynonymous | 0 | 2 |
| PDGFRB    | chr5  | 149512491/G//A         | nonsynonymous | 0 | 2 |
| STC2      | chr5  | 172744903/C//T         | nonsynonymous | 0 | 2 |
| RREB1     | chr6  | 7231817/G//A           | nonsynonymous | 0 | 2 |
| MYLIP     | chr6  | 16144037/G//A          | nonsynonymous | 0 | 2 |
| SLC17A1   | chr6  | 25820128/A//C          | nonsynonymous | 0 | 2 |
| HIST1H1C  | chr6  | 26056236/CCTTCTTGGG//C | nonsynonymous | 0 | 2 |
| OR10C1    | chr6  | 29408456/G//A          | nonsynonymous | 0 | 2 |
| ANKS1A    | chr6  | 34985431/C//T          | synonymous    | 0 | 2 |
| PTCRA     | chr6  | 42890794/G//A          | nonsynonymous | 0 | 2 |
| KCNQ5     | chr6  | 73843246/C//T          | synonymous    | 0 | 2 |
| FRK       | chr6  | 116263645/G//A         | nonsynonymous | 0 | 2 |
| THEMIS    | chr6  | 128134623/T//G         | nonsynonymous | 0 | 2 |
| LPA       | chr6  | 160968972/G//T         | synonymous    | 0 | 2 |
| PARK2     | chr6  | 162864355/T//G         | nonsynonymous | 0 | 2 |
| ELFN1     | chr7  | 1786477/G//A           | nonsynonymous | 0 | 2 |
| FSCN1     | chr7  | 5645038/G//C           | nonsynonymous | 0 | 2 |
|           | chr7  | 19035740/C//A          | synonymous    | 0 | 2 |
| ELMO1     | chr7  | 37250986/C//T          | synonymous    | 0 | 2 |
| KRIT1     | chr7  | 91842667/G//A          | nonsynonymous | 0 | 2 |
| TFR2      | chr7  | 100238383/G//T         | synonymous    | 0 | 2 |
| ATXN7L1   | chr7  | 105278909/G//C         | nonsynonymous | 0 | 2 |
| SSPO      | chr7  | 149487409/G//A         | nonsynonymous | 0 | 2 |
| CSMD1     | chr8  | 2967742/G//A           | synonymous    | 0 | 2 |
| INTS10    | chr8  | 19687979/C//T          | synonymous    | 0 | 2 |
| INTS9     | chr8  | 28633383/T//C          | nonsynonymous | 0 | 2 |
| WRN       | chr8  | 30958372/G//A          | synonymous    | 0 | 2 |
| PXDNL     | chr8  | 52321807/C//T          | nonsynonymous | 0 | 2 |
| DNAJC5B   | chr8  | 66989015/C//T          | synonymous    | 0 | 2 |
| CPA6      | chr8  | 68658258/C//T          | nonsynonymous | 0 | 2 |
| PREX2     | chr8  | 68992691/C//T          | synonymous    | 0 | 2 |
| KCNB2     | chr8  | 73480500/G//T          | nonsynonymous | 0 | 2 |
| MMP16     | chr8  | 89180161/C//T          | nonsynonymous | 0 | 2 |
| CSMD3     | chr8  | 113657457/G//T         | synonymous    | 0 | 2 |
| COL22A1   | chr8  | 139890287/G//A         | nonsynonymous | 0 | 2 |
| SCRIB     | chr8  | 144893402/G//C         | synonymous    | 0 | 2 |
| SMARCA2   | chr9  | 2058328/T//G           | nonsynonymous | 0 | 2 |
| ADAMTSL1  | chr9  | 18777224/C//T          | synonymous    | 0 | 2 |
| TLE4      | chr9  | 82188702/G//A          | nonsynonymous | 0 | 2 |
| OR13C2    | chr9  | 107367720/C//A         | synonymous    | 0 | 2 |
| OR13C9    | chr9  | 107380012/T//C         | synonymous    | 0 | 2 |
| ASTN2     | chr9  | 119977007/C//T         | synonymous    | 0 | 2 |
| TSC1      | chr9  | 135797350/C//T         | synonymous    | 0 | 2 |
| DIP2C     | chr10 | 391025/G//A            | nonsynonymous | 0 | 2 |
| PTCHD3    | chr10 | 27702459/C//T          | nonsynonymous | 0 | 2 |
| CDH23     | chr10 | 73563112/G//A          | nonsynonymous | 0 | 2 |
| SH2D4B    | chr10 | 82298025/G//A          | synonymous    | 0 | 2 |
| CFAP46    | chr10 | 134659596/C//T         | nonsynonymous | 0 | 2 |
| DGKZ      | chr11 | 46400767/C//G          | nonsynonymous | 0 | 2 |
| LRFN4     | chr11 | 66625986/C//T          | synonymous    | 0 | 2 |

|          |       |                |               |   |   |
|----------|-------|----------------|---------------|---|---|
| DSCAML1  | chr11 | 117335856/G//A | nonsynonymous | 0 | 2 |
| OR8G1    | chr11 | 124120779/G//A | synonymous    | 0 | 2 |
| APOBEC1  | chr12 | 7802129/C//T   | synonymous    | 0 | 2 |
| CLEC4C   | chr12 | 7883439/G//A   | nonsynonymous | 0 | 2 |
| CASC1    | chr12 | 25261549/G//T  | nonsynonymous | 0 | 2 |
| AQP2     | chr12 | 50349335/C//T  | nonsynonymous | 0 | 2 |
| SLC26A10 | chr12 | 58014797/C//T  | synonymous    | 0 | 2 |
| OS9      | chr12 | 58111969/C//T  | nonsynonymous | 0 | 2 |
| NAV3     | chr12 | 78592429/C//G  | nonsynonymous | 0 | 2 |
| ULK1     | chr12 | 132405878/C//T | nonsynonymous | 0 | 2 |
| CCDC169  | chr13 | 36871810/C//T  | nonsynonymous | 0 | 2 |
| SPRY2    | chr13 | 80911780/C//A  | nonsynonymous | 0 | 2 |
| MYO16    | chr13 | 109793030/G//C | synonymous    | 0 | 2 |
| TEP1     | chr14 | 20848416/G//A  | nonsynonymous | 0 | 2 |
| RNASE11  | chr14 | 21051942/C//T  | synonymous    | 0 | 2 |
| RNF31    | chr14 | 24626515/G//A  | nonsynonymous | 0 | 2 |
| DACT1    | chr14 | 59113522/G//A  | synonymous    | 0 | 2 |
| TMEM63C  | chr14 | 77705948/G//A  | nonsynonymous | 0 | 2 |
| VRK1     | chr14 | 97326889/T//A  | synonymous    | 0 | 2 |
| INF2     | chr14 | 105167948/G//T | synonymous    | 0 | 2 |
| FAM227B  | chr15 | 49868986/C//T  | synonymous    | 0 | 2 |
| CORO2B   | chr15 | 69018260/C//T  | nonsynonymous | 0 | 2 |
| HBQ1     | chr16 | 230747/G//A    | nonsynonymous | 0 | 2 |
| PRR35    | chr16 | 615404/C//T    | synonymous    | 0 | 2 |
| ADCY9    | chr16 | 4164025/G//A   | synonymous    | 0 | 2 |
| SMG1     | chr16 | 18823286/G//T  | nonsynonymous | 0 | 2 |
| GPR139   | chr16 | 20084944/C//T  | synonymous    | 0 | 2 |
| IRX6     | chr16 | 55362789/G//A  | nonsynonymous | 0 | 2 |
| ZNF319   | chr16 | 58031577/G//A  | nonsynonymous | 0 | 2 |
| CDH11    | chr16 | 64981515/G//A  | synonymous    | 0 | 2 |
| CDH1     | chr16 | 68849586/G//T  | nonsynonymous | 0 | 2 |
| HYDIN    | chr16 | 71094403/T//G  | synonymous    | 0 | 2 |
| CNTNAP4  | chr16 | 76350307/C//A  | synonymous    | 0 | 2 |
| ADAMTS18 | chr16 | 77327095/C//T  | nonsynonymous | 0 | 2 |
| FOXF1    | chr16 | 86545145/G//A  | nonsynonymous | 0 | 2 |
| TUBB3    | chr16 | 90001883/G//A  | nonsynonymous | 0 | 2 |
| PLD2     | chr17 | 4726139/C//A   | nonsynonymous | 0 | 2 |
| TP53     | chr17 | 7577067/T//A   | nonsynonymous | 0 | 2 |
| TP53     | chr17 | 7577069/C//A   | nonsynonymous | 0 | 2 |
| NTN1     | chr17 | 9143098/C//A   | nonsynonymous | 0 | 2 |
| MYH1     | chr17 | 10416212/G//T  | synonymous    | 0 | 2 |
| NOS2     | chr17 | 26125721/C//T  | synonymous    | 0 | 2 |
| ARHGAP23 | chr17 | 36614486/G//A  | synonymous    | 0 | 2 |
| KCNH6    | chr17 | 61613154/C//T  | nonsynonymous | 0 | 2 |
| KCNH6    | chr17 | 61615880/G//A  | nonsynonymous | 0 | 2 |
| CD300C   | chr17 | 72537643/C//T  | synonymous    | 0 | 2 |
| RNF157   | chr17 | 74141389/C//T  | nonsynonymous | 0 | 2 |
| MTCL1    | chr18 | 8784555/C//T   | nonsynonymous | 0 | 2 |
| SERPIN2  | chr18 | 61569672/G//A  | nonsynonymous | 0 | 2 |
| DSEL     | chr18 | 65179052/A//T  | nonsynonymous | 0 | 2 |
| ELANE    | chr19 | 852341/C//T    | nonsynonymous | 0 | 2 |
| ABCA7    | chr19 | 1045159/C//A   | synonymous    | 0 | 2 |
| ATCAY    | chr19 | 3918819/G//A   | synonymous    | 0 | 2 |
| ZNF558   | chr19 | 8933397/C//T   | synonymous    | 0 | 2 |
| B3GNT3   | chr19 | 17919126/C//T  | synonymous    | 0 | 2 |
| FFAR3    | chr19 | 35850481/C//T  | nonsynonymous | 0 | 2 |
| ZNF569   | chr19 | 37903536/G//A  | nonsynonymous | 0 | 2 |
| LRRC4B   | chr19 | 51021608/C//T  | synonymous    | 0 | 2 |
| SYT3     | chr19 | 51128655/G//A  | synonymous    | 0 | 2 |
| BIRC8    | chr19 | 53793576/C//T  | nonsynonymous | 0 | 2 |
| AURKC    | chr19 | 57744038/G//A  | nonsynonymous | 0 | 2 |
| ADAM33   | chr20 | 3654269/C//T   | synonymous    | 0 | 2 |
| REM1     | chr20 | 30072136/G//A  | nonsynonymous | 0 | 2 |
| TOP1     | chr20 | 39690075/C//G  | nonsynonymous | 0 | 2 |
| GNAS     | chr20 | 57429235/C//T  | synonymous    | 0 | 2 |
| KIAA1671 | chr22 | 25436780/A//T  | nonsynonymous | 0 | 2 |
| SELENOM  | chr22 | 31501230/C//T  | synonymous    | 0 | 2 |
| LARGE1   | chr22 | 33778016/G//A  | synonymous    | 0 | 2 |
| FBLN1    | chr22 | 45970514/C//T  | synonymous    | 0 | 2 |
| ARHGAP6  | chrX  | 11682692/G//A  | nonsynonymous | 0 | 2 |

|          |       |                    |               |   |   |
|----------|-------|--------------------|---------------|---|---|
| WNK3     | chrX  | 54263455/G//A      | nonsynonymous | 0 | 2 |
| MAGEC2   | chrX  | 141291745/C//T     | nonsynonymous | 0 | 2 |
| GPR50    | chrX  | 150348705/C//T     | nonsynonymous | 0 | 2 |
| FBN2     | chr5  | 127873165/C//T     | synonymous    | 0 | 2 |
| VTCN1    | chr1  | 117699488/A//C     | nonsynonymous | 0 | 2 |
| MNDA     | chr1  | 158811949/G//A     | synonymous    | 0 | 2 |
| SELP     | chr1  | 169582277/A//G     | nonsynonymous | 0 | 2 |
| CEP170   | chr1  | 243319649/G//T     | nonsynonymous | 0 | 2 |
| ITSN2    | chr2  | 24426535/C//T      | nonsynonymous | 0 | 2 |
| DHX57    | chr2  | 39053107/C//G      | nonsynonymous | 0 | 2 |
| STEAP3   | chr2  | 120005592/C//T     | nonsynonymous | 0 | 2 |
| GALNT13  | chr2  | 155102354/T//A     | nonsynonymous | 0 | 2 |
| TTN      | chr2  | 179454763/G//A     | synonymous    | 0 | 2 |
| SCN11A   | chr3  | 38908847/C//T      | nonsynonymous | 0 | 2 |
| POC1A    | chr3  | 52159166/G//A      | nonsynonymous | 0 | 2 |
| CACNA2D3 | chr3  | 54922012/C//G      | nonsynonymous | 0 | 2 |
| ROBO2    | chr3  | 77147379/CT//C     | nonsynonymous | 0 | 2 |
| DZIP3    | chr3  | 108394727/C//T     | synonymous    | 0 | 2 |
| DGKG     | chr3  | 185986694/C//T     | nonsynonymous | 0 | 2 |
| CPZ      | chr4  | 8603110/G//T       | nonsynonymous | 0 | 2 |
| CPZ      | chr4  | 8603121/C//A       | synonymous    | 0 | 2 |
| ADGRL3   | chr4  | 62936417/G//A      | nonsynonymous | 0 | 2 |
| CDH9     | chr5  | 26881405/G//A      | nonsynonymous | 0 | 2 |
| ITGA1    | chr5  | 52214594/T//C      | nonsynonymous | 0 | 2 |
| APC      | chr5  | 112173665/A//T     | nonsynonymous | 0 | 2 |
| FBN2     | chr5  | 127624892/G//C     | nonsynonymous | 0 | 2 |
| PCDHGB1  | chr5  | 140729957/C//T     | nonsynonymous | 0 | 2 |
| FOXQ1    | chr6  | 1312852/G//A       | synonymous    | 0 | 2 |
| RREB1    | chr6  | 7232039/G//A       | nonsynonymous | 0 | 2 |
| ADGRF5   | chr6  | 46826169/C//T      | synonymous    | 0 | 2 |
| FAM135A  | chr6  | 71190660/A//C      | nonsynonymous | 0 | 2 |
| LAMA4    | chr6  | 112460430/G//A     | synonymous    | 0 | 2 |
| PACRG    | chr6  | 163235315/T//A     | nonsynonymous | 0 | 2 |
| BMPER    | chr7  | 34085913/C//T      | synonymous    | 0 | 2 |
| CALCR    | chr7  | 93091405/A//G      | nonsynonymous | 0 | 2 |
| ZNF746   | chr7  | 149171593/G//A     | nonsynonymous | 0 | 2 |
| ADAM2    | chr8  | 39624709/G//T      | nonsynonymous | 0 | 2 |
| DCAF4L2  | chr8  | 88885044/G//A      | nonsynonymous | 0 | 2 |
| OSGIN2   | chr8  | 90937251/G//A      | nonsynonymous | 0 | 2 |
| DPYS     | chr8  | 105440236/C//T     | nonsynonymous | 0 | 2 |
| PRUNE2   | chr9  | 79325235/C//T      | nonsynonymous | 0 | 2 |
| POLR3A   | chr10 | 79741953/CGTGTG//C | nonsynonymous | 0 | 2 |
| IFIT1    | chr10 | 91163378/T//G      | nonsynonymous | 0 | 2 |
| SMC3     | chr10 | 112340744/G//A     | nonsynonymous | 0 | 2 |
| PHRF1    | chr11 | 608092/T//C        | nonsynonymous | 0 | 2 |
| CAPRIN1  | chr11 | 34074027/G//C      | synonymous    | 0 | 2 |
| INTS5    | chr11 | 62415327/G//A      | nonsynonymous | 0 | 2 |
| SPTBN2   | chr11 | 66453435/G//A      | synonymous    | 0 | 2 |
| TRIM77   | chr11 | 89447424/G//A      | nonsynonymous | 0 | 2 |
| DYNC2H1  | chr11 | 103048526/G//A     | nonsynonymous | 0 | 2 |
| NCAM1    | chr11 | 113126682/G//A     | nonsynonymous | 0 | 2 |
| OR8D1    | chr11 | 124179758/C//T     | nonsynonymous | 0 | 2 |
| SLCO1B1  | chr12 | 21327592/T//C      | nonsynonymous | 0 | 2 |
| IL22     | chr12 | 68647128/G//A      | nonsynonymous | 0 | 2 |
| NAV3     | chr12 | 78512039/C//A      | nonsynonymous | 0 | 2 |
| ANKS1B   | chr12 | 99640356/G//A      | synonymous    | 0 | 2 |
| OAS2     | chr12 | 113448328/G//A     | synonymous    | 0 | 2 |
| PLD4     | chr14 | 105395274/G//A     | synonymous    | 0 | 2 |
| PIEZO1   | chr16 | 88807934/G//A      | synonymous    | 0 | 2 |
| TP53     | chr17 | 7578553/T//C       | nonsynonymous | 0 | 2 |
| MARCH10  | chr17 | 60814491/T//A      | nonsynonymous | 0 | 2 |
| CYB561   | chr17 | 61511684/G//A      | synonymous    | 0 | 2 |
| TEX2     | chr17 | 62291095/G//A      | synonymous    | 0 | 2 |
| SLC25A10 | chr17 | 79686879/G//A      | nonsynonymous | 0 | 2 |
| ZNF750   | chr17 | 80789903/G//A      | nonsynonymous | 0 | 2 |
| ATP8B3   | chr19 | 1800401/G//A       | synonymous    | 0 | 2 |
| CYP4F22  | chr19 | 15640598/G//A      | nonsynonymous | 0 | 2 |
| SIRT2    | chr19 | 39371522/C//A      | nonsynonymous | 0 | 2 |
| NDUFAF5  | chr20 | 13765714/G//T      | synonymous    | 0 | 2 |
| NHSL2    | chrX  | 71358496/C//A      | synonymous    | 0 | 2 |

|          |       |                |               |   |   |
|----------|-------|----------------|---------------|---|---|
| GPR174   | chrX  | 78427441/C//A  | nonsynonymous | 0 | 2 |
| TBC1D8B  | chrX  | 106117198/C//A | synonymous    | 0 | 2 |
| SAGE1    | chrX  | 134988657/G//A | nonsynonymous | 0 | 2 |
| GCN1     | chr12 | 120598014/T//C | nonsynonymous | 1 | 1 |
| GPR153   | chr1  | 6314624/C//A   | nonsynonymous | 0 | 2 |
| HCN1     | chr5  | 45262467/C//T  | synonymous    | 1 | 1 |
| ZNF98    | chr19 | 22574657/T//C  | synonymous    | 0 | 2 |
| NCMAP    | chr1  | 24921953/C//T  | nonsynonymous | 0 | 2 |
| CSF1     | chr1  | 110466732/G//T | nonsynonymous | 0 | 2 |
| FLG      | chr1  | 152281983/G//A | synonymous    | 0 | 2 |
| GAD1     | chr2  | 171693364/A//G | synonymous    | 0 | 2 |
| TTN      | chr2  | 179451486/T//C | nonsynonymous | 0 | 2 |
| UNC80    | chr2  | 210769633/C//A | nonsynonymous | 0 | 2 |
| C3orf14  | chr3  | 62319060/G//A  | nonsynonymous | 0 | 2 |
| PDIA5    | chr3  | 122865102/C//T | nonsynonymous | 0 | 2 |
| CHST13   | chr3  | 126261099/C//T | nonsynonymous | 0 | 2 |
| OPA1     | chr3  | 193364896/A//C | nonsynonymous | 0 | 2 |
| QDPR     | chr4  | 17513680/T//C  | synonymous    | 0 | 2 |
| ANAPC4   | chr4  | 25419908/G//A  | synonymous    | 0 | 2 |
| CYP2U1   | chr4  | 108871406/C//T | nonsynonymous | 0 | 2 |
| TRAPPC11 | chr4  | 184629722/G//A | nonsynonymous | 0 | 2 |
| ANKH     | chr5  | 14758657/C//T  | nonsynonymous | 0 | 2 |
| CDH18    | chr5  | 19612625/C//T  | synonymous    | 0 | 2 |
| MRPS30   | chr5  | 44815150/G//A  | nonsynonymous | 0 | 2 |
| CDKL3    | chr5  | 133640227/C//T | nonsynonymous | 0 | 2 |
| CXCL14   | chr5  | 134914198/G//A | synonymous    | 0 | 2 |
| PCDHB7   | chr5  | 140553541/C//T | synonymous    | 0 | 2 |
|          | chr5  | 141233955/C//T | synonymous    | 0 | 2 |
| ADAMTS2  | chr5  | 178585776/G//A | synonymous    | 0 | 2 |
|          | chr6  | 30313237/G//A  | synonymous    | 0 | 2 |
| PTCRA    | chr6  | 42883872/C//T  | synonymous    | 0 | 2 |
| ASCC3    | chr6  | 101100621/T//A | nonsynonymous | 0 | 2 |
| MAP3K5   | chr6  | 137041639/G//A | synonymous    | 0 | 2 |
| PLG      | chr6  | 161134093/G//A | synonymous    | 0 | 2 |
| ABCA13   | chr7  | 48494747/C//G  | nonsynonymous | 0 | 2 |
| TMEM248  | chr7  | 66413557/A//G  | nonsynonymous | 0 | 2 |
| CALN1    | chr7  | 71252855/C//T  | nonsynonymous | 0 | 2 |
| ACHE     | chr7  | 100490410/G//C | synonymous    | 0 | 2 |
| LAMB4    | chr7  | 107744978/C//T | synonymous    | 0 | 2 |
| KCND2    | chr7  | 119915600/G//A | nonsynonymous | 0 | 2 |
| TMEM178B | chr7  | 140912480/C//T | nonsynonymous | 0 | 2 |
| MTERF3   | chr8  | 97258097/T//G  | nonsynonymous | 0 | 2 |
| SHB      | chr9  | 37974800/A//T  | nonsynonymous | 0 | 2 |
| SEMA4D   | chr9  | 92002361/C//T  | nonsynonymous | 0 | 2 |
| TRIM32   | chr9  | 119461850/T//G | nonsynonymous | 0 | 2 |
| STXBP1   | chr9  | 130438109/G//T | nonsynonymous | 0 | 2 |
| UAP1L1   | chr9  | 139977184/C//T | synonymous    | 0 | 2 |
| ADARB2   | chr10 | 1405321/C//T   | nonsynonymous | 0 | 2 |
| KIF5B    | chr10 | 32310167/G//C  | nonsynonymous | 0 | 2 |
| WDR11    | chr10 | 122610974/C//T | synonymous    | 0 | 2 |
| OSBPL5   | chr11 | 3123503/C//A   | nonsynonymous | 0 | 2 |
| OR52J3   | chr11 | 5068422/C//T   | nonsynonymous | 0 | 2 |
| CABP4    | chr11 | 67225897/C//T  | nonsynonymous | 0 | 2 |
| OR8S1    | chr12 | 48921822/C//T  | nonsynonymous | 0 | 2 |
| KMT2D    | chr12 | 49418622/C//G  | nonsynonymous | 0 | 2 |
| TNS2     | chr12 | 53452896/C//T  | nonsynonymous | 0 | 2 |
| ZFC3H1   | chr12 | 72020049/G//A  | synonymous    | 0 | 2 |
| GIT2     | chr12 | 110383069/C//T | nonsynonymous | 0 | 2 |
| DDX54    | chr12 | 113616826/G//A | synonymous    | 0 | 2 |
| SLC8B1   | chr12 | 113737492/C//T | synonymous    | 0 | 2 |
| TNFRSF19 | chr13 | 24190175/G//T  | nonsynonymous | 0 | 2 |
| PTPN21   | chr14 | 88945510/C//T  | synonymous    | 0 | 2 |
| SEZ6L2   | chr16 | 29909230/G//T  | nonsynonymous | 0 | 2 |
| AARS     | chr16 | 70302247/C//T  | nonsynonymous | 0 | 2 |
| PKD1L2   | chr16 | 81211572/G//T  | synonymous    | 0 | 2 |
| PLD2     | chr17 | 4714232/G//A   | synonymous    | 0 | 2 |
| TP53     | chr17 | 7577018/C//T   | nonsynonymous | 0 | 2 |
| KRT14    | chr17 | 39742607/T//G  | nonsynonymous | 0 | 2 |
| RNFT1    | chr17 | 58034650/C//T  | nonsynonymous | 0 | 2 |
| SOX9     | chr17 | 70119820/CA//C | nonsynonymous | 0 | 2 |

|          |       |                |               |   |   |
|----------|-------|----------------|---------------|---|---|
| NPTX1    | chr17 | 78444762/G//A  | nonsynonymous | 0 | 2 |
| TBCD     | chr17 | 80888453/C//T  | nonsynonymous | 0 | 2 |
| FHOD3    | chr18 | 34191951/G//A  | nonsynonymous | 0 | 2 |
| SMAD2    | chr18 | 45374990/T//C  | nonsynonymous | 0 | 2 |
| CACTIN   | chr19 | 3612045/T//C   | nonsynonymous | 0 | 2 |
| INSR     | chr19 | 7163143/T//A   | nonsynonymous | 0 | 2 |
| NPHS1    | chr19 | 36339073/G//A  | synonymous    | 0 | 2 |
| ZNF571   | chr19 | 38055647/C//T  | synonymous    | 0 | 2 |
| NUP62    | chr19 | 50412686/T//A  | nonsynonymous | 0 | 2 |
| SLC23A2  | chr20 | 4893541/G//A   | synonymous    | 0 | 2 |
| CD93     | chr20 | 23066694/C//T  | nonsynonymous | 0 | 2 |
| PIGU     | chr20 | 33148709/G//A  | synonymous    | 0 | 2 |
| JPH2     | chr20 | 42744802/CG//C | nonsynonymous | 0 | 2 |
| SEMG2    | chr20 | 43851878/A//T  | nonsynonymous | 0 | 2 |
| GNAS     | chr20 | 57430121/C//T  | nonsynonymous | 0 | 2 |
| KRTAP8-1 | chr21 | 32185398/G//A  | synonymous    | 0 | 2 |
| PATZ1    | chr22 | 31723224/C//T  | nonsynonymous | 0 | 2 |
| DDX17    | chr22 | 38882427/C//T  | nonsynonymous | 0 | 2 |
| MGAT3    | chr22 | 39883845/C//T  | nonsynonymous | 0 | 2 |
| FANCB    | chrX  | 14877361/C//T  | synonymous    | 0 | 2 |
| MAGEB18  | chrX  | 26157258/G//T  | nonsynonymous | 0 | 2 |
| FTHL17   | chrX  | 31090100/C//T  | synonymous    | 0 | 2 |
| BHLHB9   | chrX  | 102004690/C//T | nonsynonymous | 0 | 2 |
| TRPC5    | chrX  | 111019945/G//T | nonsynonymous | 0 | 2 |
| CDC27    | chr17 | 45219315/T//G  | synonymous    | 0 | 2 |
| CPTP     | chr1  | 1262892/G//A   | nonsynonymous | 0 | 2 |
| GPR157   | chr1  | 9164633/C//T   | nonsynonymous | 0 | 2 |
| SELENON  | chr1  | 26140643/A//G  | nonsynonymous | 0 | 2 |
| ADGRB2   | chr1  | 32221809/C//T  | nonsynonymous | 0 | 2 |
| GPX7     | chr1  | 53074130/G//A  | synonymous    | 0 | 2 |
| GJA5     | chr1  | 147230995/G//A | nonsynonymous | 0 | 2 |
| OR6K6    | chr1  | 158724764/C//T | synonymous    | 0 | 2 |
| LHX4-AS1 | chr1  | 180243175/T//C | synonymous    | 0 | 2 |
| NLRP3    | chr1  | 247607422/G//A | nonsynonymous | 0 | 2 |
| NRXN1    | chr2  | 50850732/G//A  | nonsynonymous | 0 | 2 |
| CTNNA2   | chr2  | 80816441/C//A  | nonsynonymous | 0 | 2 |
| GPR39    | chr2  | 133402920/C//G | nonsynonymous | 0 | 2 |
| DNAJC10  | chr2  | 183582817/G//A | nonsynonymous | 0 | 2 |
| MAP2     | chr2  | 210560164/A//T | synonymous    | 0 | 2 |
| BARD1    | chr2  | 215617252/A//C | nonsynonymous | 0 | 2 |
| CCR4     | chr3  | 32995826/C//G  | nonsynonymous | 0 | 2 |
| SLC6A20  | chr3  | 45807096/C//T  | synonymous    | 0 | 2 |
| PLXNB1   | chr3  | 48451704/C//T  | nonsynonymous | 0 | 2 |
| GOLGB1   | chr3  | 121441213/T//A | nonsynonymous | 0 | 2 |
|          | chr3  | 158300601/A//G | synonymous    | 0 | 2 |
| TNK2     | chr3  | 195609019/C//T | nonsynonymous | 0 | 2 |
| TRMT44   | chr4  | 8469935/C//T   | nonsynonymous | 0 | 2 |
| BTC      | chr4  | 75695348/C//T  | nonsynonymous | 0 | 2 |
| KIAA1109 | chr4  | 123161112/G//C | nonsynonymous | 0 | 2 |
| NIPBL    | chr5  | 37044530/A//G  | nonsynonymous | 0 | 2 |
| ANKRD31  | chr5  | 74464905/G//A  | nonsynonymous | 0 | 2 |
| VCAN     | chr5  | 82786281/G//A  | synonymous    | 0 | 2 |
| NR3C1    | chr5  | 142658907/G//A | synonymous    | 0 | 2 |
| PDGFRB   | chr5  | 149513451/C//T | nonsynonymous | 0 | 2 |
| IL12B    | chr5  | 158747472/A//G | nonsynonymous | 0 | 2 |
| GABRB2   | chr5  | 160721231/G//A | nonsynonymous | 0 | 2 |
| MAML1    | chr5  | 179201752/C//T | synonymous    | 0 | 2 |
| OR14J1   | chr6  | 29274618/G//A  | nonsynonymous | 0 | 2 |
| OR2H2    | chr6  | 29556084/C//T  | synonymous    | 0 | 2 |
| TREML2   | chr6  | 41166018/G//A  | nonsynonymous | 0 | 2 |
| KHDC1L   | chr6  | 73935118/G//A  | nonsynonymous | 0 | 2 |
| SMPD2    | chr6  | 109764886/C//T | synonymous    | 0 | 2 |
| PLG      | chr6  | 161155095/C//T | synonymous    | 0 | 2 |
| SDK1     | chr7  | 4119221/G//A   | synonymous    | 0 | 2 |
| COBL     | chr7  | 51096287/G//C  | nonsynonymous | 0 | 2 |
| ZKSCAN1  | chr7  | 99621462/G//A  | synonymous    | 0 | 2 |
| COL26A1  | chr7  | 101199070/C//A | synonymous    | 0 | 2 |
| WNT2     | chr7  | 116955205/C//T | nonsynonymous | 0 | 2 |
| SSPO     | chr7  | 149500107/G//A | nonsynonymous | 0 | 2 |
| ADAMDEC1 | chr8  | 24251598/G//A  | nonsynonymous | 0 | 2 |

|              |       |                         |               |   |   |
|--------------|-------|-------------------------|---------------|---|---|
| UNC5D        | chr8  | 35093412/G//A           | synonymous    | 0 | 2 |
| ADAM18       | chr8  | 39525666/C//T           | synonymous    | 0 | 2 |
| SFRP1        | chr8  | 41166280/G//T           | nonsynonymous | 0 | 2 |
| MYBL1        | chr8  | 67479194/G//A           | nonsynonymous | 0 | 2 |
| DCSTAMP      | chr8  | 105367322/G//A          | nonsynonymous | 0 | 2 |
| CSMD3        | chr8  | 113529403/C//T          | nonsynonymous | 0 | 2 |
| ARC          | chr8  | 143695471/G//T          | synonymous    | 0 | 2 |
| C5           | chr9  | 123745027/G//A          | nonsynonymous | 0 | 2 |
| MUC5B        | chr11 | 1267641/C//T            | synonymous    | 0 | 2 |
| FLRT1        | chr11 | 63884335/C//T           | nonsynonymous | 0 | 2 |
| DDI1         | chr11 | 103908577/G//A          | nonsynonymous | 0 | 2 |
| OR10G4       | chr11 | 123886320/A//G          | synonymous    | 0 | 2 |
| KCNA6        | chr12 | 4920191/C//T            | synonymous    | 0 | 2 |
| TMEM52B      | chr12 | 10332174/A//G           | nonsynonymous | 0 | 2 |
| ADAMTS20     | chr12 | 43944807/C//T           | nonsynonymous | 0 | 2 |
| KRT5         | chr12 | 52908784/C//T           | nonsynonymous | 0 | 2 |
| MSRB3        | chr12 | 65722322/TACACACATCA//T | nonsynonymous | 0 | 2 |
| PPFIA2       | chr12 | 81777975/C//A           | nonsynonymous | 0 | 2 |
| LRRIQ1       | chr12 | 85626496/G//T           | nonsynonymous | 0 | 2 |
| USP44        | chr12 | 95922718/A//G           | synonymous    | 0 | 2 |
| RPH3A        | chr12 | 113303233/G//A          | nonsynonymous | 0 | 2 |
| TMEM132D     | chr12 | 129563125/A//G          | nonsynonymous | 0 | 2 |
| MTUS2        | chr13 | 29855918/C//T           | nonsynonymous | 0 | 2 |
| PCDH17       | chr13 | 58207227/G//A           | nonsynonymous | 0 | 2 |
| CCDC168      | chr13 | 103383005/T//C          | nonsynonymous | 0 | 2 |
| OR4Q3        | chr14 | 20216343/G//A           | nonsynonymous | 0 | 2 |
| CLEC14A      | chr14 | 38725024/G//A           | synonymous    | 0 | 2 |
| SIX4         | chr14 | 61190701/G//A           | nonsynonymous | 0 | 2 |
| MAP1A        | chr15 | 43820928/C//T           | synonymous    | 0 | 2 |
| RNF111       | chr15 | 59368258/C//T           | nonsynonymous | 0 | 2 |
| ACAN         | chr15 | 89385018/A//G           | nonsynonymous | 0 | 2 |
| MSLN         | chr16 | 815000/G//A             | synonymous    | 0 | 2 |
| FLYWCH1      | chr16 | 2988367/C//T            | nonsynonymous | 0 | 2 |
| TBX6         | chr16 | 30100485/C//T           | nonsynonymous | 0 | 2 |
| CDH8         | chr16 | 61747818/G//A           | synonymous    | 0 | 2 |
| CES3         | chr16 | 66997759/G//A           | nonsynonymous | 0 | 2 |
| EDC4         | chr16 | 67918118/C//A           | synonymous    | 0 | 2 |
| FOXL1        | chr16 | 86612368/C//T           | synonymous    | 0 | 2 |
| MYBBP1A      | chr17 | 4446037/C//T            | nonsynonymous | 0 | 2 |
| TM4SF5       | chr17 | 4686251/C//T            | synonymous    | 0 | 2 |
| TXNDC17      | chr17 | 6544424/A//T            | nonsynonymous | 0 | 2 |
| TP53         | chr17 | 7577132/CT//C           | nonsynonymous | 0 | 2 |
| TP53         | chr17 | 7578526/C//T            | nonsynonymous | 0 | 2 |
| MYO15A       | chr17 | 18023041/C//T           | synonymous    | 0 | 2 |
| UNK          | chr17 | 73808347/C//T           | nonsynonymous | 0 | 2 |
| ALKBH7       | chr19 | 6374905/G//A            | nonsynonymous | 0 | 2 |
| C19orf47     | chr19 | 40829971/G//A           | nonsynonymous | 0 | 2 |
| ERCC2        | chr19 | 45867057/C//T           | synonymous    | 0 | 2 |
| SHANK1       | chr19 | 51171407/G//A           | synonymous    | 0 | 2 |
| LOC100129083 | chr19 | 51919951/G//A           | nonsynonymous | 0 | 2 |
| FCAR         | chr19 | 55385722/C//T           | synonymous    | 0 | 2 |
| ZNF814       | chr19 | 58385055/C//T           | nonsynonymous | 0 | 2 |
| TSHZ2        | chr20 | 51871611/G//C           | nonsynonymous | 0 | 2 |
| ZNF831       | chr20 | 57766515/G//A           | synonymous    | 0 | 2 |
| CDH4         | chr20 | 60448937/C//T           | nonsynonymous | 0 | 2 |
| RTEL1        | chr20 | 62290757/T//C           | nonsynonymous | 0 | 2 |
| ADAMTS5      | chr21 | 28327141/C//A           | nonsynonymous | 0 | 2 |
| PCDH11X      | chrX  | 91090769/C//A           | nonsynonymous | 0 | 2 |
| MAGEA12      | chrX  | 151900718/G//A          | nonsynonymous | 0 | 2 |
| ERBB4        | chr2  | 212289025/T//A          | synonymous    | 0 | 2 |
| MYO10        | chr5  | 16699658/C//T           | nonsynonymous | 0 | 2 |
| LVRN         | chr5  | 115348077/C//A          | nonsynonymous | 0 | 2 |
| LRRC28       | chr15 | 99828068/C//G           | synonymous    | 0 | 2 |
| AGO4         | chr1  | 36306804/C//T           | nonsynonymous | 0 | 2 |
| GRIK3        | chr1  | 37271757/G//A           | synonymous    | 0 | 2 |
| PRPF3        | chr1  | 150297545/G//A          | nonsynonymous | 0 | 2 |
| ASTN1        | chr1  | 176992584/C//T          | nonsynonymous | 0 | 2 |
| QSOX1        | chr1  | 180166416/G//A          | synonymous    | 0 | 2 |
| OBSCN        | chr1  | 228471428/G//A          | nonsynonymous | 0 | 2 |
| OSR1         | chr2  | 19553398/G//T           | nonsynonymous | 0 | 2 |

|              |       |                   |               |   |   |
|--------------|-------|-------------------|---------------|---|---|
| FBXO41       | chr2  | 73486085/G//A     | synonymous    | 0 | 2 |
| FER1L5       | chr2  | 97357669/C//T     | synonymous    | 0 | 2 |
| THSD7B       | chr2  | 137917796/G//A    | synonymous    | 0 | 2 |
| OSBPL6       | chr2  | 179226532/C//T    | nonsynonymous | 0 | 2 |
| TTN          | chr2  | 179599535/A//C    | nonsynonymous | 0 | 2 |
| IQCF1        | chr3  | 51929179/C//T     | synonymous    | 0 | 2 |
| PPM1M        | chr3  | 52282387/A//C     | nonsynonymous | 0 | 2 |
| EPHA6        | chr3  | 97311565/C//T     | synonymous    | 0 | 2 |
| GRAMD1C      | chr3  | 113649666/C//T    | nonsynonymous | 0 | 2 |
| SEMA5B       | chr3  | 122632822/G//A    | nonsynonymous | 0 | 2 |
| XRN1         | chr3  | 142151562/C//T    | nonsynonymous | 0 | 2 |
| C1QTNF7      | chr4  | 15443893/G//T     | nonsynonymous | 0 | 2 |
| FREM3        | chr4  | 144621238/G//A    | synonymous    | 0 | 2 |
| FBXW7        | chr4  | 153249400/G//A    | nonsynonymous | 0 | 2 |
| IL31RA       | chr5  | 55179013/G//A     | nonsynonymous | 0 | 2 |
| ARHGEF28     | chr5  | 73072424/C//T     | nonsynonymous | 0 | 2 |
| APC          | chr5  | 112175174/G//T    | nonsynonymous | 0 | 2 |
| JADE2        | chr5  | 133896552/G//A    | nonsynonymous | 0 | 2 |
| HIST1H1B     | chr6  | 27834842/G//T     | nonsynonymous | 0 | 2 |
| COL21A1      | chr6  | 55925754/C//T     | nonsynonymous | 0 | 2 |
| C6orf163     | chr6  | 88054832/A//T     | synonymous    | 0 | 2 |
| SLC22A16     | chr6  | 110763562/C//T    | synonymous    | 0 | 2 |
| REV3L        | chr6  | 111650871/T//C    | nonsynonymous | 0 | 2 |
| FNDC1        | chr6  | 159653499/G//A    | nonsynonymous | 0 | 2 |
| SEMA3E       | chr7  | 83014750/C//A     | nonsynonymous | 0 | 2 |
| ZSCAN21      | chr7  | 99654851/G//GAGGC | nonsynonymous | 0 | 2 |
| HR           | chr8  | 21984772/G//A     | nonsynonymous | 0 | 2 |
| PLEC         | chr8  | 144991734/G//A    | synonymous    | 0 | 2 |
| PALM2-AKAP2  | chr9  | 112900755/G//A    | synonymous    | 0 | 2 |
| FAM129B      | chr9  | 130270468/G//A    | synonymous    | 0 | 2 |
| AKR1C1       | chr10 | 5008116/G//A      | nonsynonymous | 0 | 2 |
| C10orf10     | chr10 | 45473043/C//A     | nonsynonymous | 0 | 2 |
|              | chr10 | 126716328/T//C    | synonymous    | 0 | 2 |
| CFAP46       | chr10 | 134754546/C//T    | nonsynonymous | 0 | 2 |
| MUC5B        | chr11 | 1253691/C//T      | nonsynonymous | 0 | 2 |
| MRGPRX4      | chr11 | 18194994/A//G     | nonsynonymous | 0 | 2 |
| ROBO3        | chr11 | 124749773/G//A    | nonsynonymous | 0 | 2 |
| TAS2R9       | chr12 | 10961912/C//T     | nonsynonymous | 0 | 2 |
| SRRM4        | chr12 | 119540111/G//C    | nonsynonymous | 0 | 2 |
| OASL         | chr12 | 121469346/T//C    | nonsynonymous | 0 | 2 |
| CLIP1        | chr12 | 122861951/G//A    | synonymous    | 0 | 2 |
| USPL1        | chr13 | 31232294/G//T     | nonsynonymous | 0 | 2 |
| SETDB2-PHF11 | chr13 | 50092165/T//G     | nonsynonymous | 0 | 2 |
| PCDH17       | chr13 | 58208945/C//T     | synonymous    | 0 | 2 |
| SLC10A1      | chr14 | 70263684/G//A     | synonymous    | 0 | 2 |
| IRF2BPL      | chr14 | 77491733/C//T     | synonymous    | 0 | 2 |
| STON2        | chr14 | 81744376/C//T     | nonsynonymous | 0 | 2 |
| SERPINA6     | chr14 | 94780856/C//T     | nonsynonymous | 0 | 2 |
| INF2         | chr14 | 105167941/C//T    | nonsynonymous | 0 | 2 |
| PGPEP1L      | chr15 | 99512804/C//T     | nonsynonymous | 0 | 2 |
| PRR35        | chr16 | 615081/C//A       | nonsynonymous | 0 | 2 |
| ZNF689       | chr16 | 30616199/G//A     | nonsynonymous | 0 | 2 |
| USB1         | chr16 | 58052921/C//T     | nonsynonymous | 0 | 2 |
| CDH11        | chr16 | 64984749/G//A     | synonymous    | 0 | 2 |
| C16orf46     | chr16 | 81095024/C//T     | synonymous    | 0 | 2 |
| VTN          | chr17 | 26697154/C//T     | synonymous    | 0 | 2 |
| ERBB2        | chr17 | 37879658/G//A     | nonsynonymous | 0 | 2 |
| SEPT4        | chr17 | 56606580/T//G     | synonymous    | 0 | 2 |
| AATK         | chr17 | 79101475/G//A     | synonymous    | 0 | 2 |
| SAFB         | chr19 | 5649943/C//T      | synonymous    | 0 | 2 |
| USE1         | chr19 | 17330546/G//A     | nonsynonymous | 0 | 2 |
| ELL          | chr19 | 18576252/T//C     | nonsynonymous | 0 | 2 |
| RYR1         | chr19 | 38990456/C//T     | synonymous    | 0 | 2 |
| JPH2         | chr20 | 42744632/C//T     | synonymous    | 0 | 2 |
| CBR3         | chr21 | 37518545/C//T     | nonsynonymous | 0 | 2 |
| SUMO3        | chr21 | 46229000/C//T     | nonsynonymous | 0 | 2 |
| IL2RB        | chr22 | 37533656/G//A     | nonsynonymous | 0 | 2 |
| SYP          | chrX  | 49054218/G//C     | synonymous    | 0 | 2 |
| TAF1         | chrX  | 70626576/G//C     | nonsynonymous | 0 | 2 |
| FLNA         | chrX  | 153590653/G//A    | synonymous    | 0 | 2 |



|          |       |                  |               |   |   |
|----------|-------|------------------|---------------|---|---|
| OSBPL9   | chr1  | 52211296/A/C     | nonsynonymous | 0 | 2 |
| PKN2     | chr1  | 89250492/A/T     | nonsynonymous | 0 | 2 |
| SPTA1    | chr1  | 158639506/C/T    | nonsynonymous | 0 | 2 |
| FAM110C  | chr2  | 45506/T/C        | nonsynonymous | 0 | 2 |
| APOB     | chr2  | 21230354/G/T     | nonsynonymous | 0 | 2 |
| TTN      | chr2  | 179516186/C/A    | nonsynonymous | 0 | 2 |
| PTH2R    | chr2  | 209358240/C/A    | nonsynonymous | 0 | 2 |
| FGFR3    | chr4  | 1805511/G/A      | synonymous    | 0 | 2 |
| TARS     | chr5  | 33457506/AG/A    | nonsynonymous | 0 | 2 |
| APC      | chr5  | 112176017/G/GCA  | nonsynonymous | 0 | 2 |
| PCDHA6   | chr5  | 140208455/C/A    | nonsynonymous | 0 | 2 |
| PCDHGA7  | chr5  | 140764170/C/A    | synonymous    | 0 | 2 |
| NKAPL    | chr6  | 28227806/TAA/T   | nonsynonymous | 0 | 2 |
| HSPA1L   | chr6  | 31778688/G/T     | nonsynonymous | 0 | 2 |
| GPR6     | chr6  | 110300760/G/A    | nonsynonymous | 0 | 2 |
| FAM20C   | chr7  | 295968/G/A       | nonsynonymous | 0 | 2 |
| SNX8     | chr7  | 2294711/C/T      | nonsynonymous | 0 | 2 |
| STRA8    | chr7  | 134925410/C/T    | nonsynonymous | 0 | 2 |
| DGKI     | chr7  | 137080402/C/A    | nonsynonymous | 0 | 2 |
| CHRNA6   | chr8  | 42611803/G/A     | nonsynonymous | 0 | 2 |
| CHD7     | chr8  | 61763057/G/A     | nonsynonymous | 0 | 2 |
| MTSS1    | chr8  | 125565491/G/A    | synonymous    | 0 | 2 |
| TEK      | chr9  | 27168535/G/A     | nonsynonymous | 0 | 2 |
| OR13J1   | chr9  | 35869820/C/T     | synonymous    | 0 | 2 |
| ODF2     | chr9  | 131235251/C/T    | nonsynonymous | 0 | 2 |
| ANO1     | chr11 | 69934055/G/A     | synonymous    | 0 | 2 |
| PUS3     | chr11 | 125763876/C/T    | nonsynonymous | 0 | 2 |
| B4GALNT3 | chr12 | 644398/A/G       | nonsynonymous | 0 | 2 |
| SLC4A8   | chr12 | 51857467/C/T     | nonsynonymous | 0 | 2 |
| SLITRK5  | chr13 | 88327743/G/A     | nonsynonymous | 0 | 2 |
| UGGT2    | chr13 | 96705547/G/C     | nonsynonymous | 0 | 2 |
| ACIN1    | chr14 | 23548850/G/GGGTT | nonsynonymous | 0 | 2 |
| ADAMTS7  | chr15 | 79063592/C/T     | synonymous    | 0 | 2 |
| RASGRF1  | chr15 | 79310133/C/T     | synonymous    | 0 | 2 |
| FLYWCH1  | chr16 | 2983739/G/A      | synonymous    | 0 | 2 |
| ZNF213   | chr16 | 3191321/C/T      | synonymous    | 0 | 2 |
| TTYH2    | chr17 | 72246144/G/A     | nonsynonymous | 0 | 2 |
| EVPL     | chr17 | 74006367/G/C     | synonymous    | 0 | 2 |
| PCSK4    | chr19 | 1483302/A/C      | nonsynonymous | 0 | 2 |
| CAMSAP3  | chr19 | 7682330/C/T      | synonymous    | 0 | 2 |
| SLC1A6   | chr19 | 15073101/G/A     | synonymous    | 0 | 2 |
| MYO9B    | chr19 | 17322521/C/T     | nonsynonymous | 0 | 2 |
| PSG6     | chr19 | 43411120/T/A     | synonymous    | 0 | 2 |
| LIG1     | chr19 | 48639341/G/A     | nonsynonymous | 0 | 2 |
| NLRP7    | chr19 | 55435219/A/G     | synonymous    | 0 | 2 |
| MRGBP    | chr20 | 61430987/C/T     | nonsynonymous | 0 | 2 |
| OGFR     | chr20 | 61444413/C/T     | synonymous    | 0 | 2 |
| IRS4     | chrX  | 107978707/G/A    | nonsynonymous | 0 | 2 |
| PADI3    | chr1  | 17586115/G/A     | synonymous    | 0 | 2 |
| SH2D5    | chr1  | 21048413/G/A     | nonsynonymous | 0 | 2 |
| GRIK3    | chr1  | 37271853/G/A     | synonymous    | 0 | 2 |
| DNAJC6   | chr1  | 65852598/C/T     | nonsynonymous | 0 | 2 |
| PROK1    | chr1  | 110998872/C/T    | nonsynonymous | 0 | 2 |
| BCAS2    | chr1  | 115118330/A/C    | nonsynonymous | 0 | 2 |
| SPAG17   | chr1  | 118629341/G/A    | synonymous    | 0 | 2 |
| GJA8     | chr1  | 147380408/G/A    | nonsynonymous | 0 | 2 |
| LCE2B    | chr1  | 152659659/C/A    | synonymous    | 0 | 2 |
| IQGAP3   | chr1  | 156518002/G/A    | nonsynonymous | 0 | 2 |
| KIF21B   | chr1  | 200961451/G/T    | synonymous    | 0 | 2 |
| OBSCN    | chr1  | 228495119/G/A    | nonsynonymous | 0 | 2 |
| MAP3K21  | chr1  | 233489647/C/A    | nonsynonymous | 0 | 2 |
| EXO1     | chr1  | 242023881/C/T    | synonymous    | 0 | 2 |
| OR2AK2   | chr1  | 248129436/C/T    | nonsynonymous | 0 | 2 |
| KCNF1    | chr2  | 11053446/G/A     | synonymous    | 0 | 2 |
| MDH1     | chr2  | 63831897/C/T     | nonsynonymous | 0 | 2 |
| THSD7B   | chr2  | 137814765/G/A    | synonymous    | 0 | 2 |
| TTN      | chr2  | 179566963/G/T    | nonsynonymous | 0 | 2 |
| COL4A4   | chr2  | 227895207/G/C    | nonsynonymous | 0 | 2 |
| COL4A3   | chr2  | 228157983/C/A    | nonsynonymous | 0 | 2 |
| ROBO2    | chr3  | 77623684/G/A     | nonsynonymous | 0 | 2 |

|          |       |                     |               |   |   |
|----------|-------|---------------------|---------------|---|---|
| LAMP3    | chr3  | 182853518/G//T      | nonsynonymous | 0 | 2 |
| HTR3D    | chr3  | 183756305/G//A      | nonsynonymous | 0 | 2 |
| FREM3    | chr4  | 144617239/G//T      | synonymous    | 0 | 2 |
| IRX1     | chr5  | 3599720/G//A        | nonsynonymous | 0 | 2 |
| CDH10    | chr5  | 24505268/C//T       | nonsynonymous | 0 | 2 |
| FBN2     | chr5  | 127648333/G//C      | synonymous    | 0 | 2 |
| FBN2     | chr5  | 127653938/T//C      | nonsynonymous | 0 | 2 |
| PCDHGB2  | chr5  | 140741602/G//A      | nonsynonymous | 0 | 2 |
| HMGXB3   | chr5  | 149431497/C//T      | synonymous    | 0 | 2 |
| RNF44    | chr5  | 175956762/G//A      | synonymous    | 0 | 2 |
| VARS     | chr6  | 31747887/C//T       | nonsynonymous | 0 | 2 |
| ABCC10   | chr6  | 43415116/G//T       | synonymous    | 0 | 2 |
| GPR6     | chr6  | 110300953/G//A      | nonsynonymous | 0 | 2 |
| CEP85L   | chr6  | 118791782/T//C      | nonsynonymous | 0 | 2 |
| MYB      | chr6  | 135517071/C//T      | synonymous    | 0 | 2 |
| SHPRH    | chr6  | 146256076/G//A      | nonsynonymous | 0 | 2 |
| PDE10A   | chr6  | 165756944/A//C      | nonsynonymous | 0 | 2 |
| SDK1     | chr7  | 4056945/G//A        | nonsynonymous | 0 | 2 |
| C7orf65  | chr7  | 47698325/G//T       | nonsynonymous | 0 | 2 |
| ABCA13   | chr7  | 48412028/C//A       | nonsynonymous | 0 | 2 |
| BRAF     | chr7  | 140481397/C//A      | nonsynonymous | 0 | 2 |
| PCM1     | chr8  | 17843043/G//A       | nonsynonymous | 0 | 2 |
| TMEM64   | chr8  | 91643863/A//T       | nonsynonymous | 0 | 2 |
| ADCY8    | chr8  | 131848632/C//T      | nonsynonymous | 0 | 2 |
| COL22A1  | chr8  | 139618674/C//A      | nonsynonymous | 0 | 2 |
| CNTNAP3B | chr9  | 43861144/C//T       | nonsynonymous | 0 | 2 |
| TRPM3    | chr9  | 73152290/C//T       | nonsynonymous | 0 | 2 |
| IKBKAP   | chr9  | 111653607/G//A      | synonymous    | 0 | 2 |
| CTNNAL1  | chr9  | 111741604/G//A      | nonsynonymous | 0 | 2 |
| OR1B1    | chr9  | 125391444/C//T      | nonsynonymous | 0 | 2 |
| CRAT     | chr9  | 131862944/C//T      | nonsynonymous | 0 | 2 |
| GJD4     | chr10 | 35897350/C//T       | synonymous    | 0 | 2 |
| CTNNA3   | chr10 | 67829254/CAT//C     | synonymous    | 0 | 2 |
| DOCK1    | chr10 | 129224200/G//A      | synonymous    | 0 | 2 |
| CNGA4    | chr11 | 6261521/C//A        | nonsynonymous | 0 | 2 |
| SYT9     | chr11 | 7324367/G//A        | synonymous    | 0 | 2 |
| CBL      | chr11 | 119148487/G//A      | nonsynonymous | 0 | 2 |
| NELL2    | chr12 | 44915950/C//T       | nonsynonymous | 0 | 2 |
| LACRT    | chr12 | 55026054/G//A       | nonsynonymous | 0 | 2 |
| SYCP3    | chr12 | 102131736/A//T      | synonymous    | 0 | 2 |
| BTBD11   | chr12 | 108051343/A//G      | nonsynonymous | 0 | 2 |
| HCAR2    | chr12 | 123187466/G//A      | nonsynonymous | 0 | 2 |
| PCDH17   | chr13 | 58207323/G//T       | nonsynonymous | 0 | 2 |
| KLF5     | chr13 | 73636643/G//A       | synonymous    | 0 | 2 |
| PNN      | chr14 | 39649838/GAGGGTA//G | nonsynonymous | 0 | 2 |
| PNN      | chr14 | 39649847/G//T       | nonsynonymous | 0 | 2 |
| FAM179B  | chr14 | 45433255/G//A       | nonsynonymous | 0 | 2 |
| UNC79    | chr14 | 94088460/C//T       | synonymous    | 0 | 2 |
| GABRA5   | chr15 | 27159978/C//G       | nonsynonymous | 0 | 2 |
| CSPG4    | chr15 | 75968675/C//T       | nonsynonymous | 0 | 2 |
| RHBDF1   | chr16 | 111954/C//T         | synonymous    | 0 | 2 |
| NLRC3    | chr16 | 3611718/C//T        | nonsynonymous | 0 | 2 |
| SRL      | chr16 | 4242321/G//T        | nonsynonymous | 0 | 2 |
| USP7     | chr16 | 9011001/TC//T       | nonsynonymous | 0 | 2 |
| ABCC1    | chr16 | 16130410/C//T       | synonymous    | 0 | 2 |
| ABCC12   | chr16 | 48177854/G//A       | nonsynonymous | 0 | 2 |
| SLC9A5   | chr16 | 67286508/G//A       | nonsynonymous | 0 | 2 |
| CLUH     | chr17 | 2598824/C//T        | synonymous    | 0 | 2 |
| TP53     | chr17 | 7578442/T//C        | nonsynonymous | 0 | 2 |
| NTN1     | chr17 | 8925978/G//T        | synonymous    | 0 | 2 |
| MYH3     | chr17 | 10543325/G//T       | synonymous    | 0 | 2 |
| KIF2B    | chr17 | 51900435/C//T       | nonsynonymous | 0 | 2 |
| BAHCC1   | chr17 | 79425420/G//A       | synonymous    | 0 | 2 |
| FAAP100  | chr17 | 79517864/G//A       | nonsynonymous | 0 | 2 |
| ZNF516   | chr18 | 74091424/A//C       | synonymous    | 0 | 2 |
| CNN2     | chr19 | 1037670/A//G        | nonsynonymous | 0 | 2 |
| SEMA6B   | chr19 | 4544353/C//T        | nonsynonymous | 0 | 2 |
| PODNL1   | chr19 | 14049119/C//G       | synonymous    | 0 | 2 |
| PKN1     | chr19 | 14552077/G//C       | nonsynonymous | 0 | 2 |
| ZNF507   | chr19 | 32847568/C//A       | nonsynonymous | 0 | 2 |

|          |       |                  |               |   |   |
|----------|-------|------------------|---------------|---|---|
| FAM187B  | chr19 | 35715865/C//T    | nonsynonymous | 0 | 2 |
| ZNF585A  | chr19 | 37642418/T//C    | synonymous    | 0 | 2 |
| ATP1A3   | chr19 | 42472968/G//T    | synonymous    | 0 | 2 |
| ERF      | chr19 | 42753668/G//A    | nonsynonymous | 0 | 2 |
| SNPH     | chr20 | 1285771/G//A     | synonymous    | 0 | 2 |
| REM1     | chr20 | 30072073/G//A    | nonsynonymous | 0 | 2 |
| L3MBTL1  | chr20 | 42143373/C//T    | synonymous    | 0 | 2 |
| NTSR1    | chr20 | 61340774/C//A    | nonsynonymous | 0 | 2 |
| PCNT     | chr21 | 47851820/A//G    | synonymous    | 0 | 2 |
|          | chr22 | 30079052/A//T    | synonymous    | 0 | 2 |
| PLXNB2   | chr22 | 50722998/G//A    | synonymous    | 0 | 2 |
| NYX      | chrX  | 41333793/G//A    | nonsynonymous | 0 | 2 |
| TRPC5OS  | chrX  | 111145461/C//A   | synonymous    | 0 | 2 |
| ZNF732   | chr4  | 265845/C//T      | synonymous    | 0 | 2 |
| OR1K1    | chr9  | 125562968/G//C   | synonymous    | 0 | 2 |
| BAGE3    | chr21 | 11049617/C//G    | nonsynonymous | 1 | 1 |
| ST3GAL3  | chr1  | 44364864/C//T    | synonymous    | 0 | 2 |
| UHMK1    | chr1  | 162469867/T//C   | nonsynonymous | 0 | 2 |
| HADHA    | chr2  | 26461987/C//G    | nonsynonymous | 0 | 2 |
| CRIM1    | chr2  | 36749369/G//A    | nonsynonymous | 0 | 2 |
| TEKT4    | chr2  | 95537665/C//T    | nonsynonymous | 0 | 2 |
| AMMECR1L | chr2  | 128627067/G//A   | nonsynonymous | 0 | 2 |
| HSPD1    | chr2  | 198352673/T//G   | nonsynonymous | 0 | 2 |
| TMEM198  | chr2  | 220412567/G//A   | nonsynonymous | 0 | 2 |
| TOPAZ1   | chr3  | 44283835/C//T    | nonsynonymous | 0 | 2 |
| SETD2    | chr3  | 47162997/T//G    | nonsynonymous | 0 | 2 |
| GOLGB1   | chr3  | 121414975/T//C   | synonymous    | 0 | 2 |
| ITGB5    | chr3  | 124540214/G//A   | synonymous    | 0 | 2 |
| RHO      | chr3  | 129251251/G//A   | nonsynonymous | 0 | 2 |
| TRIM42   | chr3  | 140401985/C//T   | synonymous    | 0 | 2 |
| LPP      | chr3  | 188590548/C//T   | synonymous    | 0 | 2 |
| NRROS    | chr3  | 196388567/C//T   | nonsynonymous | 0 | 2 |
| PROM1    | chr4  | 16010694/G//A    | synonymous    | 0 | 2 |
| ATP8A1   | chr4  | 42618043/T//C    | synonymous    | 0 | 2 |
| UBA6     | chr4  | 68489850/T//A    | nonsynonymous | 0 | 2 |
| WDFY3    | chr4  | 85731344/C//G    | nonsynonymous | 0 | 2 |
| PPP3CA   | chr4  | 102001731/T//C   | nonsynonymous | 0 | 2 |
| PDZD2    | chr5  | 32069671/T//C    | synonymous    | 0 | 2 |
| IL6ST    | chr5  | 55259225/T//C    | synonymous    | 0 | 2 |
| PCDHA12  | chr5  | 140255547/G//A   | nonsynonymous | 0 | 2 |
| PCDHGA9  | chr5  | 140784372/C//T   | nonsynonymous | 0 | 2 |
| BMP6     | chr6  | 7727818/C//T     | synonymous    | 0 | 2 |
| TRIM27   | chr6  | 28876581/T//A    | synonymous    | 0 | 2 |
| CDSN     | chr6  | 31085253/G//A    | nonsynonymous | 0 | 2 |
| FNDC1    | chr6  | 159653528/G//A   | nonsynonymous | 0 | 2 |
| MRPL18   | chr6  | 160212039/A//G   | synonymous    | 0 | 2 |
|          | chr7  | 21468433/A//C    | synonymous    | 0 | 2 |
| FGFR1    | chr8  | 38287438/C//G    | synonymous    | 0 | 2 |
| CSMD3    | chr8  | 113308209/T//C   | nonsynonymous | 0 | 2 |
| LAMC3    | chr9  | 133911650/C//T   | nonsynonymous | 0 | 2 |
| DHX32    | chr10 | 127527615/G//T   | nonsynonymous | 0 | 2 |
| OR5D13   | chr11 | 55541620/G//A    | nonsynonymous | 0 | 2 |
| TENM4    | chr11 | 78381121/C//T    | nonsynonymous | 0 | 2 |
| NCAPD3   | chr11 | 134080199/T//G   | nonsynonymous | 0 | 2 |
| GSG1     | chr12 | 13241739/G//A    | nonsynonymous | 0 | 2 |
| PRICKLE1 | chr12 | 42853796/C//T    | nonsynonymous | 0 | 2 |
| DBX2     | chr12 | 45429831/C//T    | nonsynonymous | 0 | 2 |
| CIT      | chr12 | 120148110/C//A   | nonsynonymous | 0 | 2 |
| GPR183   | chr13 | 99947874/C//T    | nonsynonymous | 0 | 2 |
| CDT1     | chr16 | 88873536/G//A    | synonymous    | 0 | 2 |
| ERBB2    | chr17 | 37868208/C//T    | nonsynonymous | 0 | 2 |
| AXIN2    | chr17 | 63554552/C//CCAA | nonsynonymous | 0 | 2 |
| SOX9     | chr17 | 70117860/A//T    | nonsynonymous | 0 | 2 |
| EBI3     | chr19 | 4231214/C//T     | nonsynonymous | 0 | 2 |
| CHAF1B   | chr21 | 37783872/T//C    | nonsynonymous | 0 | 2 |
| AMY2B    | chr1  | 104114762/C//T   | nonsynonymous | 0 | 2 |
| FLG      | chr1  | 152277189/G//A   | synonymous    | 0 | 2 |
| OBSCN    | chr1  | 228482738/G//A   | nonsynonymous | 0 | 2 |
| NID1     | chr1  | 236145059/C//T   | nonsynonymous | 0 | 2 |
| MTR      | chr1  | 237054459/G//A   | nonsynonymous | 0 | 2 |

|           |       |                          |               |   |   |
|-----------|-------|--------------------------|---------------|---|---|
| APOB      | chr2  | 21247929/G//A            | nonsynonymous | 0 | 2 |
| DRC1      | chr2  | 26644195/A//G            | nonsynonymous | 0 | 2 |
| TCF23     | chr2  | 27373194/G//A            | synonymous    | 0 | 2 |
| RASGRP3   | chr2  | 33747142/G//T            | synonymous    | 0 | 2 |
| KCNIP3    | chr2  | 96049004/G//A            | nonsynonymous | 0 | 2 |
| CFAP221   | chr2  | 120404625/C//T           | nonsynonymous | 0 | 2 |
| XIRP2     | chr2  | 168103596/T//G           | synonymous    | 0 | 2 |
| TTN       | chr2  | 179596443/C//A           | nonsynonymous | 0 | 2 |
| NEUROD1   | chr2  | 182543157/C//T           | nonsynonymous | 0 | 2 |
| ECEL1     | chr2  | 233350643/C//T           | nonsynonymous | 0 | 2 |
| CNTN4     | chr3  | 2613143/G//A             | synonymous    | 0 | 2 |
| ZBBX      | chr3  | 167051664/T//C           | nonsynonymous | 0 | 2 |
| GP5       | chr3  | 194118986/G//A           | nonsynonymous | 0 | 2 |
| EVC       | chr4  | 5754776/C//T             | nonsynonymous | 0 | 2 |
| GBA3      | chr4  | 22820477/A//T            | synonymous    | 0 | 2 |
| GABRG1    | chr4  | 46060534/C//T            | nonsynonymous | 0 | 2 |
| GLRA3     | chr4  | 175749941/G//A           | nonsynonymous | 0 | 2 |
| MAP3K1    | chr5  | 56181795/C//T            | nonsynonymous | 0 | 2 |
| PIK3R1    | chr5  | 67589569/TGTAGGGAAAAATTA | nonsynonymous | 0 | 2 |
| APC       | chr5  | 112174455/T//TAATAG      | nonsynonymous | 0 | 2 |
| PCDHGA3   | chr5  | 140723769/C//T           | nonsynonymous | 0 | 2 |
|           | chr5  | 146728306/G//A           | synonymous    | 0 | 2 |
| GEMIN5    | chr5  | 154278010/T//C           | nonsynonymous | 0 | 2 |
| PANK3     | chr5  | 168006289/G//A           | synonymous    | 0 | 2 |
| FAM193B   | chr5  | 176966040/C//T           | nonsynonymous | 0 | 2 |
| TUBB2B    | chr6  | 3226841/A//T             | nonsynonymous | 0 | 2 |
| HIST1H2BG | chr6  | 26216777/C//T            | nonsynonymous | 0 | 2 |
| ZNF391    | chr6  | 27368870/C//T            | nonsynonymous | 0 | 2 |
| SLC44A4   | chr6  | 31833313/T//A            | nonsynonymous | 0 | 2 |
| C2        | chr6  | 31896515/G//A            | nonsynonymous | 0 | 2 |
| SPATS1    | chr6  | 44329580/G//A            | nonsynonymous | 0 | 2 |
| ANKRD6    | chr6  | 90326298/C//T            | synonymous    | 0 | 2 |
| TXLNB     | chr6  | 139597966/C//T           | nonsynonymous | 0 | 2 |
| CREB5     | chr7  | 28610075/C//T            | synonymous    | 0 | 2 |
| KMT2C     | chr7  | 151841864/T//A           | synonymous    | 0 | 2 |
| SNAI2     | chr8  | 49832591/G//A            | synonymous    | 0 | 2 |
| PXDNL     | chr8  | 52258454/G//A            | nonsynonymous | 0 | 2 |
|           | chr8  | 120608106/G//A           | synonymous    | 0 | 2 |
| ZC3H3     | chr8  | 144618587/G//A           | synonymous    | 0 | 2 |
| ACO1      | chr9  | 32408522/G//A            | nonsynonymous | 0 | 2 |
| GENE      | chr9  | 36222986/G//T            | nonsynonymous | 0 | 2 |
| APBA1     | chr9  | 72047577/G//A            | nonsynonymous | 0 | 2 |
| TMEM38B   | chr9  | 108467985/T//C           | synonymous    | 0 | 2 |
| OBP2B     | chr9  | 136083867/C//T           | synonymous    | 0 | 2 |
| LHX3      | chr9  | 139091555/G//GCA         | nonsynonymous | 0 | 2 |
| C9orf142  | chr9  | 139887110/G//A           | synonymous    | 0 | 2 |
| DIP2C     | chr10 | 408466/C//T              | nonsynonymous | 0 | 2 |
| OPTN      | chr10 | 13166004/G//A            | nonsynonymous | 0 | 2 |
| DNMBP     | chr10 | 101648613/C//T           | nonsynonymous | 0 | 2 |
| OR51Q1    | chr11 | 5443900/C//T             | nonsynonymous | 0 | 2 |
| OR9Q2     | chr11 | 57958876/T//C            | nonsynonymous | 0 | 2 |
| ARAP1     | chr11 | 72423585/C//T            | nonsynonymous | 0 | 2 |
| SORL1     | chr11 | 121429350/G//C           | nonsynonymous | 0 | 2 |
| CD163L1   | chr12 | 7531838/C//T             | nonsynonymous | 0 | 2 |
| TAS2R8    | chr12 | 10959439/G//C            | nonsynonymous | 0 | 2 |
| SLC5A8    | chr12 | 101551054/G//A           | synonymous    | 0 | 2 |
| AMER2     | chr13 | 25744303/C//T            | synonymous    | 0 | 2 |
| FLT1      | chr13 | 29012396/G//A            | nonsynonymous | 0 | 2 |
| CTSG      | chr14 | 25043468/G//A            | nonsynonymous | 0 | 2 |
| FOXG1     | chr14 | 29237831/C//T            | nonsynonymous | 0 | 2 |
| TERB2     | chr15 | 45249124/G//A            | nonsynonymous | 0 | 2 |
| TLN2      | chr15 | 63089545/G//A            | nonsynonymous | 0 | 2 |
| CHTF18    | chr16 | 845124/G//A              | synonymous    | 0 | 2 |
| IL4R      | chr16 | 27374642/C//G            | nonsynonymous | 0 | 2 |
| ADAMTS18  | chr16 | 77353832/C//T            | nonsynonymous | 0 | 2 |
| TMEM104   | chr17 | 72791745/C//T            | nonsynonymous | 0 | 2 |
| CBLN2     | chr18 | 70205542/C//A            | nonsynonymous | 0 | 2 |
| MUC16     | chr19 | 8961996/C//A             | nonsynonymous | 0 | 2 |
|           | chr19 | 35646305/C//A            | synonymous    | 0 | 2 |
| PROSER3   | chr19 | 36258697/G//A            | synonymous    | 0 | 2 |

|              |       |                |               |   |   |
|--------------|-------|----------------|---------------|---|---|
| LTBP4        | chr19 | 41128555/G//T  | nonsynonymous | 0 | 2 |
| TPRX1        | chr19 | 48306143/C//T  | nonsynonymous | 0 | 2 |
| SMOX         | chr20 | 4162600/G//A   | nonsynonymous | 0 | 2 |
| SOGA1        | chr20 | 35444460/C//T  | nonsynonymous | 0 | 2 |
| ADAMTS5      | chr21 | 28338138/G//A  | synonymous    | 0 | 2 |
| YBEY         | chr21 | 47707032/C//T  | nonsynonymous | 0 | 2 |
| SUV39H1      | chrX  | 48559096/C//G  | synonymous    | 0 | 2 |
| PCDH11X      | chrX  | 91134258/G//A  | nonsynonymous | 0 | 2 |
| IRS4         | chrX  | 107977567/C//T | nonsynonymous | 0 | 2 |
| TONSL        | chr8  | 145661462/G//T | nonsynonymous | 0 | 2 |
| ZNF433       | chr19 | 12125984/C//T  | synonymous    | 0 | 2 |
| ZNF208       | chr19 | 22156830/C//T  | nonsynonymous | 0 | 2 |
| BAGE3        | chr21 | 11049621/G//A  | nonsynonymous | 1 | 1 |
| BAGE4        | chr21 | 11049623/T//C  | nonsynonymous | 1 | 1 |
| BSDC1        | chr1  | 32834053/C//T  | nonsynonymous | 0 | 2 |
| TIE1         | chr1  | 43770528/C//T  | nonsynonymous | 0 | 2 |
|              | chr1  | 51810762/G//A  | synonymous    | 0 | 2 |
| PATJ         | chr1  | 62241004/C//T  | nonsynonymous | 0 | 2 |
| BCL9         | chr1  | 147096464/C//T | nonsynonymous | 0 | 2 |
| SLAMF7       | chr1  | 160721156/G//C | nonsynonymous | 0 | 2 |
| SLC30A3      | chr2  | 27480066/G//T  | nonsynonymous | 0 | 2 |
| TCF7L1       | chr2  | 85532525/G//A  | nonsynonymous | 0 | 2 |
| LCT          | chr2  | 136566512/C//A | synonymous    | 0 | 2 |
| NEB          | chr2  | 152554108/C//T | nonsynonymous | 0 | 2 |
| ALS2         | chr2  | 202631982/C//T | nonsynonymous | 0 | 2 |
| NEPRO        | chr3  | 112732803/G//T | nonsynonymous | 0 | 2 |
| CHST13       | chr3  | 126261356/G//A | nonsynonymous | 0 | 2 |
| CLSTN2       | chr3  | 140122484/G//A | synonymous    | 0 | 2 |
| CLSTN2       | chr3  | 140178443/A//T | nonsynonymous | 0 | 2 |
| TRPC1        | chr3  | 142525039/C//T | nonsynonymous | 0 | 2 |
| AGTR1        | chr3  | 148459160/A//G | nonsynonymous | 0 | 2 |
| EPHB3        | chr3  | 184298752/C//T | synonymous    | 0 | 2 |
| CFAP99       | chr4  | 2461869/C//A   | nonsynonymous | 0 | 2 |
| ENAM         | chr4  | 71509557/G//C  | nonsynonymous | 0 | 2 |
| PCDH10       | chr4  | 134072148/G//T | nonsynonymous | 0 | 2 |
| MYOT         | chr5  | 137222986/G//A | nonsynonymous | 0 | 2 |
| PCDHA6       | chr5  | 140207950/C//T | nonsynonymous | 0 | 2 |
| SYCP2L       | chr6  | 10887331/C//T  | synonymous    | 0 | 2 |
| HIST1H2AG    | chr6  | 27100947/C//T  | nonsynonymous | 0 | 2 |
| HIST1H2BM    | chr6  | 27783149/C//T  | nonsynonymous | 0 | 2 |
| RXRB         | chr6  | 33168070/C//T  | nonsynonymous | 0 | 2 |
| PHF1         | chr6  | 33383094/G//A  | nonsynonymous | 0 | 2 |
| SLC26A8      | chr6  | 35965683/C//T  | synonymous    | 0 | 2 |
| LRRC73       | chr6  | 43476632/G//A  | nonsynonymous | 0 | 2 |
| CCNC         | chr6  | 99998189/G//C  | synonymous    | 0 | 2 |
| LAMA4        | chr6  | 112469484/C//A | nonsynonymous | 0 | 2 |
| FSCN1        | chr7  | 5643546/C//T   | synonymous    | 0 | 2 |
| GRM3         | chr7  | 86394750/G//C  | nonsynonymous | 0 | 2 |
| RELN         | chr7  | 103234872/C//T | nonsynonymous | 0 | 2 |
| FLNC         | chr7  | 128486420/G//A | nonsynonymous | 0 | 2 |
| MPDZ         | chr9  | 13168437/G//T  | nonsynonymous | 0 | 2 |
| GALT         | chr9  | 34646755/C//T  | synonymous    | 0 | 2 |
| POLR3A       | chr10 | 79770276/G//A  | nonsynonymous | 0 | 2 |
| OAT          | chr10 | 126086536/A//C | nonsynonymous | 0 | 2 |
| ADAM12       | chr10 | 127806744/T//A | nonsynonymous | 0 | 2 |
| KCNC1        | chr11 | 17757916/G//A  | nonsynonymous | 0 | 2 |
| SLC17A6      | chr11 | 22360098/A//T  | nonsynonymous | 0 | 2 |
| MTNR1B       | chr11 | 92703054/G//A  | nonsynonymous | 0 | 2 |
| KRT83        | chr12 | 52708554/G//A  | nonsynonymous | 0 | 2 |
| NOS1         | chr12 | 117672378/G//A | nonsynonymous | 0 | 2 |
| MZT1         | chr13 | 73301700/G//T  | nonsynonymous | 0 | 2 |
| PARP2        | chr14 | 20811833/C//T  | synonymous    | 0 | 2 |
| CCNB2        | chr15 | 59397352/C//T  | synonymous    | 0 | 2 |
| HCN4         | chr15 | 73624577/G//A  | synonymous    | 0 | 2 |
| CLK3         | chr15 | 74908105/C//T  | nonsynonymous | 0 | 2 |
| STARD5       | chr15 | 81616490/G//A  | synonymous    | 0 | 2 |
| POLG         | chr15 | 89876358/T//A  | nonsynonymous | 0 | 2 |
| ITGAD        | chr16 | 31437436/T//G  | nonsynonymous | 0 | 2 |
| ADCY7        | chr16 | 50343553/T//A  | nonsynonymous | 0 | 2 |
| LOC100130950 | chr17 | 5137997/G//A   | synonymous    | 0 | 2 |

|              |       |                    |               |   |   |
|--------------|-------|--------------------|---------------|---|---|
| MMP28        | chr17 | 34093887/G//A      | nonsynonymous | 0 | 2 |
| FKBP10       | chr17 | 39974510/C//T      | synonymous    | 0 | 2 |
| CD300LF      | chr17 | 72700756/G//T      | synonymous    | 0 | 2 |
| ZBTB14       | chr18 | 5293279/C//T       | synonymous    | 0 | 2 |
| PIEZO2       | chr18 | 10761028/G//T      | nonsynonymous | 0 | 2 |
| PNPLA6       | chr19 | 7600813/C//T       | nonsynonymous | 0 | 2 |
| FBN3         | chr19 | 8212229/G//A       | nonsynonymous | 0 | 2 |
| ZNF823       | chr19 | 11833104/G//T      | synonymous    | 0 | 2 |
| HOOK2        | chr19 | 12876942/G//A      | nonsynonymous | 0 | 2 |
| HSPB6        | chr19 | 36246550/C//T      | nonsynonymous | 0 | 2 |
| FBXO27       | chr19 | 39516137/G//A      | nonsynonymous | 0 | 2 |
| PHLDB3       | chr19 | 43979518/C//T      | synonymous    | 0 | 2 |
| RTN2         | chr19 | 45992718/A//G      | nonsynonymous | 0 | 2 |
| NLRP8        | chr19 | 56473555/C//T      | nonsynonymous | 0 | 2 |
|              | chr20 | 3219627/G//A       | synonymous    | 0 | 2 |
| KAT14        | chr20 | 18123341/C//T      | nonsynonymous | 0 | 2 |
| TIAM1        | chr21 | 32519227/T//A      | nonsynonymous | 0 | 2 |
| SEC14L4      | chr22 | 30891955/C//T      | nonsynonymous | 0 | 2 |
| PIGA         | chrX  | 15342835/T//C      | nonsynonymous | 0 | 2 |
| IL1RAPL1     | chrX  | 29301081/G//T      | nonsynonymous | 0 | 2 |
| BEX1         | chrX  | 102318048/C//T     | nonsynonymous | 0 | 2 |
| INTS6L       | chrX  | 134713896/A//G     | nonsynonymous | 0 | 2 |
| ARHGAP4      | chrX  | 153184440/C//T     | nonsynonymous | 0 | 2 |
| MTOR         | chr1  | 11184573/G//A      | nonsynonymous | 0 | 2 |
| CSMD2        | chr1  | 34180223/G//A      | nonsynonymous | 0 | 2 |
| PODN         | chr1  | 53544662/C//T      | nonsynonymous | 0 | 2 |
| FLG          | chr1  | 152278614/A//T     | nonsynonymous | 0 | 2 |
| NPR1         | chr1  | 153653059/C//T     | synonymous    | 0 | 2 |
|              | chr1  | 174957810/C//A     | synonymous    | 0 | 2 |
| RGSL1        | chr1  | 182520256/C//T     | synonymous    | 0 | 2 |
| OR2M5        | chr1  | 248309327/G//A     | nonsynonymous | 0 | 2 |
| OR2M3        | chr1  | 248367070/G//A     | nonsynonymous | 0 | 2 |
| KIDINS220    | chr2  | 8926117/G//A       | synonymous    | 0 | 2 |
| EHBP1        | chr2  | 63175875/G//A      | nonsynonymous | 0 | 2 |
| THSD7B       | chr2  | 138000059/G//A     | nonsynonymous | 0 | 2 |
| TTN          | chr2  | 179455956/G//A     | nonsynonymous | 0 | 2 |
| ANKRD44      | chr2  | 197943438/ACTGC//A | nonsynonymous | 0 | 2 |
| SPATA3       | chr2  | 231861183/C//T     | nonsynonymous | 0 | 2 |
| KIF1A        | chr2  | 241661926/G//A     | nonsynonymous | 0 | 2 |
| ZNF621       | chr3  | 40567328/C//T      | synonymous    | 0 | 2 |
| LOC100132146 | chr3  | 46658790/C//T      | nonsynonymous | 0 | 2 |
| ATP6V1A      | chr3  | 113499950/G//A     | nonsynonymous | 0 | 2 |
| COL6A6       | chr3  | 130305467/G//A     | nonsynonymous | 0 | 2 |
| COL6A6       | chr3  | 130311566/G//T     | nonsynonymous | 0 | 2 |
| MED12L       | chr3  | 151085967/G//T     | nonsynonymous | 0 | 2 |
| ATP13A3      | chr3  | 194170890/G//A     | synonymous    | 0 | 2 |
| ZFYVE28      | chr4  | 2274921/C//T       | nonsynonymous | 0 | 2 |
| AFAP1        | chr4  | 7774601/G//A       | synonymous    | 0 | 2 |
| ATG12        | chr5  | 115177248/A//G     | nonsynonymous | 0 | 2 |
| PCDHB6       | chr5  | 140530442/G//A     | nonsynonymous | 0 | 2 |
| SPINK5       | chr5  | 147493998/G//A     | nonsynonymous | 0 | 2 |
| HSPA1A       | chr6  | 31785438/C//T      | synonymous    | 0 | 2 |
| LRFN2        | chr6  | 40399634/G//A      | nonsynonymous | 0 | 2 |
| KLHDC3       | chr6  | 42986824/C//T      | synonymous    | 0 | 2 |
| CRISP3       | chr6  | 49696439/G//A      | synonymous    | 0 | 2 |
| PKHD1        | chr6  | 51524087/C//A      | nonsynonymous | 0 | 2 |
| RAET1G       | chr6  | 150240331/G//A     | nonsynonymous | 0 | 2 |
| FOXK1        | chr7  | 4796676/C//T       | nonsynonymous | 0 | 2 |
| RADIL        | chr7  | 4874675/C//T       | nonsynonymous | 0 | 2 |
| DNAH11       | chr7  | 21599253/C//A      | nonsynonymous | 0 | 2 |
| MYOM2        | chr8  | 2005484/C//T       | synonymous    | 0 | 2 |
| VPS13B       | chr8  | 100871666/G//A     | nonsynonymous | 0 | 2 |
| TAF1L        | chr9  | 32631935/G//A      | nonsynonymous | 0 | 2 |
| PFKFB3       | chr10 | 6259141/C//G       | nonsynonymous | 0 | 2 |
| SFMBT2       | chr10 | 7239527/C//T       | nonsynonymous | 0 | 2 |
| TNNT3        | chr11 | 1956136/G//A       | nonsynonymous | 0 | 2 |
| EIF4G2       | chr11 | 10827509/T//A      | nonsynonymous | 0 | 2 |
| OR5AN1       | chr11 | 59132537/A//G      | nonsynonymous | 0 | 2 |
| TMEM132A     | chr11 | 60701155/G//A      | nonsynonymous | 0 | 2 |
| FLRT1        | chr11 | 63883943/C//T      | synonymous    | 0 | 2 |

|          |       |                 |               |   |   |
|----------|-------|-----------------|---------------|---|---|
| NCAM1    | chr11 | 113105804/G//A  | synonymous    | 0 | 2 |
| CEP164   | chr11 | 117265175/G//A  | nonsynonymous | 0 | 2 |
| XPO4     | chr13 | 21395842/C//T   | nonsynonymous | 0 | 2 |
| AHNAK2   | chr14 | 105411897/G//A  | synonymous    | 0 | 2 |
| CATSPER2 | chr15 | 43925084/C//T   | synonymous    | 0 | 2 |
| UNC13C   | chr15 | 54305416/G//T   | nonsynonymous | 0 | 2 |
| MIEF2    | chr17 | 18167262/C//A   | nonsynonymous | 0 | 2 |
| KRT12    | chr17 | 39019979/G//A   | synonymous    | 0 | 2 |
| KRT23    | chr17 | 39092747/C//T   | nonsynonymous | 0 | 2 |
| KCNH4    | chr17 | 40321665/C//T   | nonsynonymous | 0 | 2 |
| SSTR2    | chr17 | 71166235/C//T   | synonymous    | 0 | 2 |
| GALK1    | chr17 | 73754580/G//A   | synonymous    | 0 | 2 |
| SMCHD1   | chr18 | 2656092/C//T    | synonymous    | 0 | 2 |
| MUC16    | chr19 | 9056490/G//A    | nonsynonymous | 0 | 2 |
| ZNF333   | chr19 | 14826225/G//A   | synonymous    | 0 | 2 |
| BRD4     | chr19 | 15349565/G//A   | nonsynonymous | 0 | 2 |
| F2RL3    | chr19 | 17001255/G//A   | synonymous    | 0 | 2 |
| NUCB1    | chr19 | 49422359/C//T   | nonsynonymous | 0 | 2 |
| FPR1     | chr19 | 52249323/G//A   | nonsynonymous | 0 | 2 |
| PRPF31   | chr19 | 54625280/G//A   | nonsynonymous | 0 | 2 |
| TTI1     | chr20 | 36627645/G//A   | nonsynonymous | 0 | 2 |
| TRPM2    | chr21 | 45819208/G//A   | nonsynonymous | 0 | 2 |
|          | chr21 | 47549065/C//T   | synonymous    | 0 | 2 |
| GNB1L    | chr22 | 19776207/G//A   | synonymous    | 0 | 2 |
| DCAF8L2  | chrX  | 27764983/C//A   | synonymous    | 0 | 2 |
| DMD      | chrX  | 31838186/A//T   | nonsynonymous | 0 | 2 |
| BCOR     | chrX  | 39932471/G//T   | nonsynonymous | 0 | 2 |
| SUV39H1  | chrX  | 48564697/C//T   | synonymous    | 0 | 2 |
| IL2RG    | chrX  | 70330763/G//A   | nonsynonymous | 0 | 2 |
| TEX13A   | chrX  | 104464446/G//T  | synonymous    | 0 | 2 |
| ADGRG4   | chrX  | 135428487/A//G  | synonymous    | 0 | 2 |
|          | chrX  | 140985378/G//C  | synonymous    | 0 | 2 |
| VMA21    | chrX  | 150573447/G//A  | nonsynonymous | 0 | 2 |
| DKC1     | chrX  | 153996651/G//A  | nonsynonymous | 0 | 2 |
| CCDC62   | chr12 | 123276585/C//T  | nonsynonymous | 1 | 1 |
| IPO4     | chr14 | 24656649/C//T   | nonsynonymous | 2 | 0 |
| B2M      | chr15 | 45003780/ACT//A | nonsynonymous | 2 | 0 |
| SPOCD1   | chr1  | 32259446/G//A   | synonymous    | 0 | 2 |
| THRAP3   | chr1  | 36769666/A//G   | synonymous    | 0 | 2 |
| ERI3     | chr1  | 44818519/C//T   | synonymous    | 0 | 2 |
| C1orf194 | chr1  | 109650569/G//T  | synonymous    | 0 | 2 |
| FLG      | chr1  | 152282957/G//A  | nonsynonymous | 0 | 2 |
| NDUFS2   | chr1  | 161173279/G//T  | nonsynonymous | 0 | 2 |
| CR1      | chr1  | 207679428/C//T  | nonsynonymous | 0 | 2 |
| USP34    | chr2  | 61441207/G//C   | nonsynonymous | 0 | 2 |
| ALMS1    | chr2  | 73677252/A//G   | nonsynonymous | 0 | 2 |
| TFCP2L1  | chr2  | 122004454/G//A  | synonymous    | 0 | 2 |
| LRP1B    | chr2  | 141806738/T//A  | nonsynonymous | 0 | 2 |
| TTN      | chr2  | 179586849/G//T  | nonsynonymous | 0 | 2 |
| STAT4    | chr2  | 191927606/G//T  | nonsynonymous | 0 | 2 |
| HTR2B    | chr2  | 231973637/A//T  | nonsynonymous | 0 | 2 |
| DOCK3    | chr3  | 51102008/C//T   | nonsynonymous | 0 | 2 |
| NPFFR2   | chr4  | 72897735/C//T   | synonymous    | 0 | 2 |
| PKHD1    | chr6  | 51890825/G//A   | synonymous    | 0 | 2 |
| GIMAP6   | chr7  | 150325329/G//A  | synonymous    | 0 | 2 |
| CHD7     | chr8  | 61775170/T//C   | nonsynonymous | 0 | 2 |
| TRIM55   | chr8  | 67039510/G//A   | nonsynonymous | 0 | 2 |
| STMN2    | chr8  | 80553707/T//C   | synonymous    | 0 | 2 |
| RBM20    | chr10 | 112541506/G//A  | nonsynonymous | 0 | 2 |
| PGGHG    | chr11 | 290448/G//A     | synonymous    | 0 | 2 |
| MUC6     | chr11 | 1016825/G//A    | synonymous    | 0 | 2 |
| OR51G2   | chr11 | 4936134/G//A    | synonymous    | 0 | 2 |
| OR4D9    | chr11 | 59282741/C//T   | nonsynonymous | 0 | 2 |
| MYRF     | chr11 | 61543834/G//T   | nonsynonymous | 0 | 2 |
| FGF4     | chr11 | 69588117/G//A   | nonsynonymous | 0 | 2 |
| ANKS1B   | chr12 | 99192714/G//A   | nonsynonymous | 0 | 2 |
| AMFR     | chr16 | 56436976/G//A   | nonsynonymous | 0 | 2 |
| CES4A    | chr16 | 67035231/G//A   | nonsynonymous | 0 | 2 |
| SLFN12L  | chr17 | 33802248/G//C   | nonsynonymous | 0 | 2 |
| CWC25    | chr17 | 36969097/T//A   | nonsynonymous | 0 | 2 |

|               |       |                |               |   |   |
|---------------|-------|----------------|---------------|---|---|
| DLGAP1        | chr18 | 3742478/G//A   | nonsynonymous | 0 | 2 |
| MTCL1         | chr18 | 8720329/G//T   | synonymous    | 0 | 2 |
| MAPRE2        | chr18 | 32681969/A//G  | synonymous    | 0 | 2 |
| SOCS6         | chr18 | 67993111/G//T  | nonsynonymous | 0 | 2 |
| LRRC8E        | chr19 | 7965308/C//T   | nonsynonymous | 0 | 2 |
| PDE4A         | chr19 | 10574591/G//T  | nonsynonymous | 0 | 2 |
| ZNF433        | chr19 | 12127088/A//C  | nonsynonymous | 0 | 2 |
| NLRP2         | chr19 | 55481398/G//A  | synonymous    | 0 | 2 |
| XKR7          | chr20 | 30584971/G//A  | nonsynonymous | 0 | 2 |
| FHL1          | chrX  | 135292128/C//T | synonymous    | 0 | 2 |
| ARHGAP30      | chr1  | 161039369/G//A | nonsynonymous | 0 | 2 |
| ATAD2B        | chr2  | 24110706/T//C  | nonsynonymous | 0 | 2 |
| CACNB4        | chr2  | 152695685/C//T | nonsynonymous | 0 | 2 |
| KCNJ13        | chr2  | 233632864/G//A | synonymous    | 0 | 2 |
| REV3L         | chr6  | 111696035/T//C | nonsynonymous | 0 | 2 |
| SYNE1         | chr6  | 152779939/G//A | nonsynonymous | 0 | 2 |
| FBXL6         | chr8  | 145579262/G//A | nonsynonymous | 0 | 2 |
| KLF9          | chr9  | 73028188/G//A  | nonsynonymous | 0 | 2 |
| USP5          | chr12 | 6967622/T//C   | nonsynonymous | 0 | 2 |
| IL23A         | chr12 | 56733499/G//T  | nonsynonymous | 0 | 2 |
| MRPL42        | chr12 | 93895019/C//G  | synonymous    | 0 | 2 |
|               | chr13 | 76195725/A//T  | synonymous    | 0 | 2 |
| ZFYVE26       | chr14 | 68252866/T//C  | nonsynonymous | 0 | 2 |
| ZFYVE1        | chr14 | 73464830/T//C  | nonsynonymous | 0 | 2 |
| ONECUT1       | chr15 | 53049839/T//C  | synonymous    | 0 | 2 |
| ESRP2         | chr16 | 68266723/G//T  | synonymous    | 0 | 2 |
| APOH          | chr17 | 64208259/G//C  | nonsynonymous | 0 | 2 |
| DGKK          | chrX  | 50122626/G//A  | nonsynonymous | 0 | 2 |
| POTEF         | chr2  | 130877704/T//G | nonsynonymous | 0 | 2 |
| HRNR          | chr1  | 152192293/C//T | synonymous    | 0 | 2 |
| CEP104        | chr1  | 3747752/T//C   | nonsynonymous | 0 | 2 |
| CNKSR1        | chr1  | 26515860/C//T  | nonsynonymous | 0 | 2 |
| TAF1A         | chr1  | 222734718/G//C | nonsynonymous | 0 | 2 |
| SCN9A         | chr2  | 167128931/G//A | nonsynonymous | 0 | 2 |
| LRP2          | chr2  | 170063767/G//T | synonymous    | 0 | 2 |
| SCN10A        | chr3  | 38739124/G//A  | nonsynonymous | 0 | 2 |
| SCN10A        | chr3  | 38830471/C//T  | nonsynonymous | 0 | 2 |
| NISCH         | chr3  | 52521374/C//T  | synonymous    | 0 | 2 |
| JAKMIP1       | chr4  | 6064101/G//A   | nonsynonymous | 0 | 2 |
| MEPE          | chr4  | 88766977/T//C  | synonymous    | 0 | 2 |
| APC           | chr5  | 112174144/T//G | nonsynonymous | 0 | 2 |
| PCDHA3        | chr5  | 140182596/C//T | nonsynonymous | 0 | 2 |
| PCDHB16       | chr5  | 140563551/G//A | nonsynonymous | 0 | 2 |
| MED7          | chr5  | 156566017/C//T | synonymous    | 0 | 2 |
| OR2B2         | chr6  | 27879902/G//T  | nonsynonymous | 0 | 2 |
| C6orf25       | chr6  | 31691750/C//T  | synonymous    | 0 | 2 |
| RPS10-NUDT3   | chr6  | 34392507/C//T  | synonymous    | 0 | 2 |
| LAMA4         | chr6  | 112437107/C//T | nonsynonymous | 0 | 2 |
| UTRN          | chr6  | 144835076/G//T | nonsynonymous | 0 | 2 |
| TLL2          | chr6  | 167754158/G//A | nonsynonymous | 0 | 2 |
| PAPOLB        | chr7  | 4901388/C//T   | synonymous    | 0 | 2 |
| AGBL3         | chr7  | 134719061/G//A | nonsynonymous | 0 | 2 |
| ZFH4          | chr8  | 77764394/C//T  | nonsynonymous | 0 | 2 |
| TG            | chr8  | 133899114/A//G | synonymous    | 0 | 2 |
| COL22A1       | chr8  | 139626111/G//A | nonsynonymous | 0 | 2 |
| KCNK9         | chr8  | 140630787/C//T | nonsynonymous | 0 | 2 |
| LRRC24        | chr8  | 145749933/C//T | synonymous    | 0 | 2 |
| PTPRD         | chr9  | 8404615/C//T   | nonsynonymous | 0 | 2 |
| TRPM6         | chr9  | 77354788/G//A  | nonsynonymous | 0 | 2 |
| PRUNE2        | chr9  | 79324251/C//A  | nonsynonymous | 0 | 2 |
| TLL2          | chr10 | 98146806/C//T  | nonsynonymous | 0 | 2 |
| GFRA1         | chr10 | 117849314/C//G | nonsynonymous | 0 | 2 |
| CHST15        | chr10 | 125771945/C//T | nonsynonymous | 0 | 2 |
| BAD           | chr11 | 64051848/G//A  | synonymous    | 0 | 2 |
| FAT3          | chr11 | 92532289/C//T  | nonsynonymous | 0 | 2 |
| SLC6A12       | chr12 | 308071/C//T    | synonymous    | 0 | 2 |
| ARID2         | chr12 | 46233112/A//T  | nonsynonymous | 0 | 2 |
| CCER1         | chr12 | 91348460/G//A  | synonymous    | 0 | 2 |
| TMEM132C      | chr12 | 129190945/G//A | synonymous    | 0 | 2 |
| P2RX5-TAX1BP3 | chr17 | 3582877/G//A   | synonymous    | 0 | 2 |



|          |       |                  |               |   |   |
|----------|-------|------------------|---------------|---|---|
| DNAH9    | chr17 | 11572805/T//A    | nonsynonymous | 0 | 2 |
| NFATC1   | chr18 | 77227587/C//T    | synonymous    | 0 | 2 |
| HCN2     | chr19 | 613304/C//T      | synonymous    | 0 | 2 |
| CYP4F22  | chr19 | 15648408/G//A    | nonsynonymous | 0 | 2 |
| NDUFA13  | chr19 | 19638564/C//T    | synonymous    | 0 | 2 |
|          | chr19 | 36277510/G//A    | synonymous    | 0 | 2 |
| LRRC4B   | chr19 | 51021383/G//A    | synonymous    | 0 | 2 |
| SLC17A9  | chr20 | 61594112/G//A    | synonymous    | 0 | 2 |
| BAIAP2L2 | chr22 | 38485118/G//A    | nonsynonymous | 0 | 2 |
| COL4A6   | chrX  | 107449792/C//T   | nonsynonymous | 0 | 2 |
| AMOT     | chrX  | 112033819/C//T   | nonsynonymous | 0 | 2 |
| MAGEA6   | chrX  | 151870313/C//A   | synonymous    | 0 | 2 |
| CDC27    | chr17 | 45234416/A//G    | synonymous    | 0 | 2 |
| OR2T33   | chr1  | 248436809/G//A   | nonsynonymous | 0 | 2 |
| OR2T33   | chr1  | 248436811/G//C   | synonymous    | 0 | 2 |
| ZNF678   | chr1  | 227843225/G//T   | nonsynonymous | 1 | 1 |
| VWA1     | chr1  | 1372301/C//T     | synonymous    | 0 | 2 |
| RLF      | chr1  | 40703484/G//A    | nonsynonymous | 0 | 2 |
| STIL     | chr1  | 47770581/G//A    | synonymous    | 0 | 2 |
| KCND3    | chr1  | 112525070/G//A   | synonymous    | 0 | 2 |
| CELF3    | chr1  | 151681524/C//T   | nonsynonymous | 0 | 2 |
| MEX3A    | chr1  | 156046736/C//T   | nonsynonymous | 0 | 2 |
| NES      | chr1  | 156642952/C//T   | nonsynonymous | 0 | 2 |
| OR10J3   | chr1  | 159284326/C//CAG | nonsynonymous | 0 | 2 |
| ERLEC1   | chr2  | 54028682/C//G    | nonsynonymous | 0 | 2 |
| ZNF638   | chr2  | 71592732/A//T    | nonsynonymous | 0 | 2 |
| KLF7     | chr2  | 207988838/G//A   | synonymous    | 0 | 2 |
| UNC80    | chr2  | 210698894/T//A   | nonsynonymous | 0 | 2 |
| GPBAR1   | chr2  | 219128027/C//T   | nonsynonymous | 0 | 2 |
| CHPF     | chr2  | 220405256/G//A   | nonsynonymous | 0 | 2 |
| SP140    | chr2  | 231109759/G//T   | nonsynonymous | 0 | 2 |
| CRBN     | chr3  | 3192468/A//T     | synonymous    | 0 | 2 |
| LRRN1    | chr3  | 3888295/A//G     | nonsynonymous | 0 | 2 |
| DAG1     | chr3  | 49568841/C//T    | synonymous    | 0 | 2 |
| PLXND1   | chr3  | 129289738/C//T   | nonsynonymous | 0 | 2 |
| COL6A5   | chr3  | 130124863/G//T   | nonsynonymous | 0 | 2 |
| EIF4G1   | chr3  | 184039835/G//C   | nonsynonymous | 0 | 2 |
| PCDH7    | chr4  | 30724715/G//A    | synonymous    | 0 | 2 |
| KIAA1211 | chr4  | 57180528/C//T    | nonsynonymous | 0 | 2 |
| UGT2B7   | chr4  | 69962369/A//G    | nonsynonymous | 0 | 2 |
| OTUD4    | chr4  | 146059506/T//C   | synonymous    | 0 | 2 |
| ADAMTS16 | chr5  | 5235263/C//T     | nonsynonymous | 0 | 2 |
|          | chr5  | 67584573/C//T    | synonymous    | 0 | 2 |
| PCDHB12  | chr5  | 140590068/G//A   | nonsynonymous | 0 | 2 |
| SH3TC2   | chr5  | 148407374/G//A   | nonsynonymous | 0 | 2 |
| CSNK1A1  | chr5  | 148885135/T//C   | nonsynonymous | 0 | 2 |
| EBF1     | chr5  | 158250178/G//A   | synonymous    | 0 | 2 |
| POM121L2 | chr6  | 27279595/T//C    | nonsynonymous | 0 | 2 |
| COL9A1   | chr6  | 70942343/G//A    | nonsynonymous | 0 | 2 |
| HBS1L    | chr6  | 135371765/A//G   | nonsynonymous | 0 | 2 |
| MAP3K4   | chr6  | 161470370/C//T   | nonsynonymous | 0 | 2 |
|          | chr7  | 50560546/G//A    | synonymous    | 0 | 2 |
| CPA1     | chr7  | 130021978/G//A   | synonymous    | 0 | 2 |
| DLGAP2   | chr8  | 1497287/G//C     | nonsynonymous | 0 | 2 |
| XKR6     | chr8  | 10782308/C//T    | nonsynonymous | 0 | 2 |
| SPIDR    | chr8  | 48614334/C//G    | nonsynonymous | 0 | 2 |
| MVB12B   | chr9  | 129154466/G//A   | synonymous    | 0 | 2 |
| TNKS2    | chr10 | 93579041/G//C    | nonsynonymous | 0 | 2 |
| EXOSC1   | chr10 | 99205716/G//T    | synonymous    | 0 | 2 |
| CYP2E1   | chr10 | 135347330/C//T   | nonsynonymous | 0 | 2 |
| IFITM10  | chr11 | 1769016/C//T     | nonsynonymous | 0 | 2 |
| FAM160A2 | chr11 | 6243709/A//G     | nonsynonymous | 0 | 2 |
| SAA4     | chr11 | 18253070/G//A    | synonymous    | 0 | 2 |
| DCDC5    | chr11 | 30914468/G//A    | nonsynonymous | 0 | 2 |
| OR5D18   | chr11 | 55587824/C//T    | nonsynonymous | 0 | 2 |
| FAT3     | chr11 | 92088223/G//T    | nonsynonymous | 0 | 2 |
| ATM      | chr11 | 108186549/G//T   | nonsynonymous | 0 | 2 |
| SPA17    | chr11 | 124564229/G//A   | nonsynonymous | 0 | 2 |
| A2ML1    | chr12 | 9009766/T//C     | nonsynonymous | 0 | 2 |
| ABCD2    | chr12 | 39947836/G//C    | nonsynonymous | 0 | 2 |

|               |       |                 |               |   |   |
|---------------|-------|-----------------|---------------|---|---|
| MVK           | chr12 | 110034316/C//T  | synonymous    | 0 | 2 |
| TMEM132C      | chr12 | 129153985/C//T  | synonymous    | 0 | 2 |
| EP400         | chr12 | 132476772/G//A  | nonsynonymous | 0 | 2 |
| SLC7A1        | chr13 | 30091337/C//T   | nonsynonymous | 0 | 2 |
| ZC3H13        | chr13 | 46554110/C//G   | nonsynonymous | 0 | 2 |
| RBM23         | chr14 | 23374865/A//G   | synonymous    | 0 | 2 |
| SYT16         | chr14 | 62550996/C//T   | nonsynonymous | 0 | 2 |
| RTL1          | chr14 | 101349752/C//T  | synonymous    | 0 | 2 |
| ITPRIPL2      | chr16 | 19126865/G//A   | nonsynonymous | 0 | 2 |
| ZNF469        | chr16 | 88504587/C//T   | nonsynonymous | 0 | 2 |
| NCOR1         | chr17 | 15978998/G//A   | nonsynonymous | 0 | 2 |
| SEZ6          | chr17 | 27308787/C//T   | nonsynonymous | 0 | 2 |
| MAP2K6        | chr17 | 67522793/C//T   | nonsynonymous | 0 | 2 |
| TSEN54        | chr17 | 73513673/G//T   | synonymous    | 0 | 2 |
| SNAPC2        | chr19 | 7987488/G//A    | nonsynonymous | 0 | 2 |
| IL27RA        | chr19 | 14163015/G//A   | synonymous    | 0 | 2 |
| ZNF506        | chr19 | 19906386/C//T   | nonsynonymous | 0 | 2 |
| C19orf47      | chr19 | 40842279/C//T   | nonsynonymous | 0 | 2 |
| MYT1          | chr20 | 62839165/G//T   | nonsynonymous | 0 | 2 |
| DSCAM         | chr21 | 41446994/G//A   | nonsynonymous | 0 | 2 |
| GRAP2         | chr22 | 40343056/C//G   | synonymous    | 0 | 2 |
| ARSA          | chr22 | 51065135/G//A   | synonymous    | 0 | 2 |
| GTPBP6        | chrX  | 228205/C//T     | nonsynonymous | 0 | 2 |
| MXRA5         | chrX  | 3240691/G//T    | nonsynonymous | 0 | 2 |
| CYP2A6        | chr19 | 41349774/A//G   | nonsynonymous | 0 | 2 |
| TSC1          | chr9  | 135772717/G//T  | synonymous    | 1 | 1 |
| PLEKHM2       | chr1  | 16060481/G//A   | synonymous    | 0 | 2 |
| UBR4          | chr1  | 19504100/G//A   | nonsynonymous | 0 | 2 |
| PQLC2         | chr1  | 19651151/G//A   | synonymous    | 0 | 2 |
| CYP4B1        | chr1  | 47276533/G//A   | synonymous    | 0 | 2 |
| DPYD          | chr1  | 98039493/G//A   | synonymous    | 0 | 2 |
| RNPC3         | chr1  | 104085918/C//T  | synonymous    | 0 | 2 |
| OR6K2         | chr1  | 158669761/G//A  | nonsynonymous | 0 | 2 |
| CACNA1S       | chr1  | 201046260/A//C  | synonymous    | 0 | 2 |
| HIST3H3       | chr1  | 228613003/C//T  | synonymous    | 0 | 2 |
| VN1R5         | chr1  | 247420049/C//T  | nonsynonymous | 0 | 2 |
| OR2AK2        | chr1  | 248129043/G//A  | nonsynonymous | 0 | 2 |
| VIT           | chr2  | 37035794/G//A   | synonymous    | 0 | 2 |
| STON1-GTF2A1L | chr2  | 48872258/T//TGA | synonymous    | 0 | 2 |
| TMEM127       | chr2  | 96919488/C//T   | synonymous    | 0 | 2 |
| SCN1A         | chr2  | 166848851/C//T  | nonsynonymous | 0 | 2 |
| ITGAV         | chr2  | 187534463/G//T  | synonymous    | 0 | 2 |
| FBXL2         | chr3  | 33416825/C//T   | nonsynonymous | 0 | 2 |
| LARS2         | chr3  | 45557610/C//T   | nonsynonymous | 0 | 2 |
| BOC           | chr3  | 112998253/C//T  | synonymous    | 0 | 2 |
| LRRRC66       | chr4  | 52883346/T//C   | nonsynonymous | 0 | 2 |
| CCN12         | chr5  | 132088655/C//T  | nonsynonymous | 0 | 2 |
| PCDHA8        | chr5  | 140222356/G//A  | nonsynonymous | 0 | 2 |
| PCDHGC4       | chr5  | 140864967/G//A  | nonsynonymous | 0 | 2 |
| ANXA6         | chr5  | 150502565/G//A  | synonymous    | 0 | 2 |
| GRM1          | chr6  | 146755313/C//T  | nonsynonymous | 0 | 2 |
| WBSCR17       | chr7  | 70597632/G//A   | synonymous    | 0 | 2 |
| PPP1R9A       | chr7  | 94916437/G//C   | nonsynonymous | 0 | 2 |
| MUC12         | chr7  | 100645731/G//A  | nonsynonymous | 0 | 2 |
|               | chr7  | 101916640/G//A  | synonymous    | 0 | 2 |
| SSPO          | chr7  | 149490536/C//T  | synonymous    | 0 | 2 |
| CSMD1         | chr8  | 2819985/T//C    | synonymous    | 0 | 2 |
|               | chr8  | 32505800/G//A   | synonymous    | 0 | 2 |
| SLA           | chr8  | 134050937/G//A  | synonymous    | 0 | 2 |
| TMEM215       | chr9  | 32784629/G//A   | nonsynonymous | 0 | 2 |
| NOL8          | chr9  | 95080904/C//T   | nonsynonymous | 0 | 2 |
| RPL12         | chr9  | 130213057/C//G  | nonsynonymous | 0 | 2 |
| STXBP1        | chr9  | 130438960/C//T  | synonymous    | 0 | 2 |
| CFAP157       | chr9  | 130471944/C//T  | synonymous    | 0 | 2 |
| FAM166A       | chr9  | 140138248/G//C  | synonymous    | 0 | 2 |
| IDI2          | chr10 | 1070629/C//T    | nonsynonymous | 0 | 2 |
| PCDH15        | chr10 | 55591209/A//T   | synonymous    | 0 | 2 |
| PCDH15        | chr10 | 55591256/A//T   | nonsynonymous | 0 | 2 |
| CALHM2        | chr10 | 105209293/C//T  | nonsynonymous | 0 | 2 |
| ADAM12        | chr10 | 127753439/G//A  | synonymous    | 0 | 2 |

|          |       |                            |               |   |   |
|----------|-------|----------------------------|---------------|---|---|
| DCDC1    | chr11 | 31312220/T//C              | nonsynonymous | 0 | 2 |
| OR4B1    | chr11 | 48238977/G//T              | nonsynonymous | 0 | 2 |
| ZFP91    | chr11 | 58378459/A//T              | nonsynonymous | 0 | 2 |
| CCDC83   | chr11 | 85593563/G//A              | nonsynonymous | 0 | 2 |
| ATM      | chr11 | 108224583/C//T             | nonsynonymous | 0 | 2 |
| DSCAML1  | chr11 | 117376243/T//C             | nonsynonymous | 0 | 2 |
| ABCG4    | chr11 | 119031669/G//A             | synonymous    | 0 | 2 |
| OVCH1    | chr12 | 29630406/C//T              | nonsynonymous | 0 | 2 |
| PRICKLE1 | chr12 | 42858944/CCT//C            | nonsynonymous | 0 | 2 |
| OR6C65   | chr12 | 55794795/C//A              | synonymous    | 0 | 2 |
| ZFC3H1   | chr12 | 72027136/C//T              | nonsynonymous | 0 | 2 |
| VEZT     | chr12 | 95660352/G//A              | synonymous    | 0 | 2 |
| ACACB    | chr12 | 109704198/C//T             | synonymous    | 0 | 2 |
| HECTD4   | chr12 | 112614503/C//A             | nonsynonymous | 0 | 2 |
| SRRM4    | chr12 | 119583478/G//A             | nonsynonymous | 0 | 2 |
| PCDH17   | chr13 | 58299162/T//G              | nonsynonymous | 0 | 2 |
| CCDC168  | chr13 | 103391600/T//C             | nonsynonymous | 0 | 2 |
| TUBGCP3  | chr13 | 113209243/G//A             | synonymous    | 0 | 2 |
| NPAS3    | chr14 | 34145574/C//T              | nonsynonymous | 0 | 2 |
| CHRNA7   | chr15 | 32460293/C//T              | synonymous    | 0 | 2 |
| TICRR    | chr15 | 90167851/G//A              | nonsynonymous | 0 | 2 |
| KIF7     | chr15 | 90185440/C//A              | nonsynonymous | 0 | 2 |
| HMOX2    | chr16 | 4558191/G//A               | nonsynonymous | 0 | 2 |
| MMP15    | chr16 | 58076239/C//T              | synonymous    | 0 | 2 |
| ALDOC    | chr17 | 26901752/C//T              | nonsynonymous | 0 | 2 |
| SDK2     | chr17 | 71431640/C//T              | nonsynonymous | 0 | 2 |
| ZNF699   | chr19 | 9408062/T//A               | nonsynonymous | 0 | 2 |
| ATP4A    | chr19 | 36050068/C//T              | nonsynonymous | 0 | 2 |
| OVOL2    | chr20 | 18022244/A//T              | nonsynonymous | 0 | 2 |
| TP53TG5  | chr20 | 44003875/C//T              | nonsynonymous | 0 | 2 |
| HELZ2    | chr20 | 62197474/C//T              | nonsynonymous | 0 | 2 |
| ASPHD2   | chr22 | 26839195/G//A              | synonymous    | 0 | 2 |
| C22orf23 | chr22 | 38347483/G//C              | nonsynonymous | 0 | 2 |
| OPHN1    | chrX  | 67454376/G//A              | nonsynonymous | 0 | 2 |
| PIK3CA   | chr3  | 178927980/T//C             | nonsynonymous | 1 | 1 |
| DMRT2    | chr9  | 1053820/A//C               | nonsynonymous | 0 | 2 |
| RTEL1    | chr20 | 62293280/C//T              | nonsynonymous | 0 | 2 |
| MUC12    | chr7  | 100646938/C//G             | nonsynonymous | 0 | 2 |
| KRTAP9-4 | chr17 | 39406104/T//G              | synonymous    | 0 | 2 |
| ATP1A2   | chr1  | 160097481/C//T             | synonymous    | 0 | 2 |
| TRIB2    | chr2  | 12880934/G//A              | synonymous    | 0 | 2 |
| SH3BP5   | chr3  | 15300453/G//A              | synonymous    | 0 | 2 |
| FASTKD3  | chr5  | 7867835/G//A               | nonsynonymous | 0 | 2 |
| ANKH     | chr5  | 14716853/A//C              | nonsynonymous | 0 | 2 |
| CAPSL    | chr5  | 35921153/C//T              | nonsynonymous | 0 | 2 |
| PCDHB7   | chr5  | 140554097/G//A             | nonsynonymous | 0 | 2 |
| ADAMTS2  | chr5  | 178608112/G//A             | synonymous    | 0 | 2 |
| PCLO     | chr7  | 82581607/C//T              | nonsynonymous | 0 | 2 |
| ANK3     | chr10 | 61844457/G//A              | nonsynonymous | 0 | 2 |
| CCAR1    | chr10 | 70509310/C//T              | nonsynonymous | 0 | 2 |
| MTA2     | chr11 | 62363224/C//T              | synonymous    | 0 | 2 |
| BSX      | chr11 | 122848369/C//T             | synonymous    | 0 | 2 |
| PPM1E    | chr17 | 57060270/C//G              | synonymous    | 0 | 2 |
| SOX9     | chr17 | 70118890/C//A              | nonsynonymous | 0 | 2 |
| ZNF521   | chr18 | 22806812/G//A              | nonsynonymous | 0 | 2 |
| ZNF418   | chr19 | 58439004/G//C              | nonsynonymous | 0 | 2 |
| WISP2    | chr20 | 43355826/G//A              | nonsynonymous | 0 | 2 |
| ZNF831   | chr20 | 57767002/G//A              | nonsynonymous | 0 | 2 |
| KIAA1644 | chr22 | 44681488/C//T              | nonsynonymous | 0 | 2 |
| CLCN4    | chrX  | 10174547/C//A              | synonymous    | 0 | 2 |
| ARID1A   | chr1  | 27105601/G//GACCCAGGACAGAt | nonsynonymous | 0 | 2 |
| ARID1A   | chr1  | 27105970/A//G              | nonsynonymous | 0 | 2 |
| SLC35D1  | chr1  | 67516120/G//A              | nonsynonymous | 0 | 2 |
| HS2ST1   | chr1  | 87570287/A//T              | nonsynonymous | 0 | 2 |
| ZNF644   | chr1  | 91406333/T//A              | nonsynonymous | 0 | 2 |
| PRMT6    | chr1  | 107600343/G//T             | nonsynonymous | 0 | 2 |
| OTUD7B   | chr1  | 149916870/C//G             | nonsynonymous | 0 | 2 |
| BNIP1    | chr1  | 151016067/C//A             | synonymous    | 0 | 2 |
| ZNF687   | chr1  | 151259041/C//G             | nonsynonymous | 0 | 2 |
| SPRR2D   | chr1  | 153012487/G//A             | synonymous    | 0 | 2 |

|          |      |                            |               |   |   |
|----------|------|----------------------------|---------------|---|---|
| CD5L     | chr1 | 157803114/G//A             | nonsynonymous | 0 | 2 |
| PRRC2C   | chr1 | 171506526/T//C             | synonymous    | 0 | 2 |
| SEC16B   | chr1 | 177930817/C//T             | nonsynonymous | 0 | 2 |
| LAMC1    | chr1 | 183077481/A//G             | nonsynonymous | 0 | 2 |
| BRINP3   | chr1 | 190067013/G//C             | synonymous    | 0 | 2 |
| KDM5B    | chr1 | 202701071/A//T             | synonymous    | 0 | 2 |
| HHIPL2   | chr1 | 222716878/C//A             | nonsynonymous | 0 | 2 |
| TLR5     | chr1 | 223284172/A//T             | nonsynonymous | 0 | 2 |
| CDC42BPA | chr1 | 227261594/T//A             | nonsynonymous | 0 | 2 |
| RYR2     | chr1 | 237889609/G//T             | nonsynonymous | 0 | 2 |
| NLRP3    | chr1 | 247597425/C//T             | nonsynonymous | 0 | 2 |
| OR2T1    | chr1 | 248569427/T//C             | synonymous    | 0 | 2 |
| OR2T1    | chr1 | 248569712/A//G             | synonymous    | 0 | 2 |
| SDC1     | chr2 | 20402614/G//A              | synonymous    | 0 | 2 |
| FSHR     | chr2 | 49190888/C//G              | nonsynonymous | 0 | 2 |
| NRXN1    | chr2 | 51149809/C//G              | nonsynonymous | 0 | 2 |
| CCDC88A  | chr2 | 55544911/G//A              | nonsynonymous | 0 | 2 |
| PUS10    | chr2 | 61175277/C//T              | nonsynonymous | 0 | 2 |
| DYSF     | chr2 | 71892374/C//A              | nonsynonymous | 0 | 2 |
| ANKRD36  | chr2 | 97877417/C//G              | nonsynonymous | 0 | 2 |
| UXS1     | chr2 | 106739477/G//A             | synonymous    | 0 | 2 |
| ACMSD    | chr2 | 135619550/C//G             | nonsynonymous | 0 | 2 |
| LRP1B    | chr2 | 141739815/C//A             | nonsynonymous | 0 | 2 |
| SCN1A    | chr2 | 166894610/T//C             | synonymous    | 0 | 2 |
| NFE2L2   | chr2 | 178098944/C//G             | nonsynonymous | 0 | 2 |
| TTN      | chr2 | 179483201/G//T             | nonsynonymous | 0 | 2 |
| ABCB6    | chr2 | 220074542/C//T             | synonymous    | 0 | 2 |
| DOCK10   | chr2 | 225666640/G//T             | synonymous    | 0 | 2 |
| TWIST2   | chr2 | 239757169/C//T             | nonsynonymous | 0 | 2 |
| CHL1     | chr3 | 425528/G//T                | nonsynonymous | 0 | 2 |
| NUP210   | chr3 | 13417919/C//G              | nonsynonymous | 0 | 2 |
| GPR15    | chr3 | 98251419/C//T              | nonsynonymous | 0 | 2 |
| KALRN    | chr3 | 124437811/C//G             | nonsynonymous | 0 | 2 |
| ALDH1L1  | chr3 | 125849077/C//T             | synonymous    | 0 | 2 |
| TRPC1    | chr3 | 142443488/C//G             | nonsynonymous | 0 | 2 |
| NLGN1    | chr3 | 173998359/C//G             | nonsynonymous | 0 | 2 |
| CCDC39   | chr3 | 180364876/C//G             | nonsynonymous | 0 | 2 |
| AFAP1    | chr4 | 7873749/A//G               | synonymous    | 0 | 2 |
| KIAA1109 | chr4 | 123095795/A//T             | nonsynonymous | 0 | 2 |
| GPM6A    | chr4 | 176556026/T//A             | synonymous    | 0 | 2 |
| IRF2     | chr4 | 185339327/G//GTGCTTAACTTTG | nonsynonymous | 0 | 2 |
| LRRC14B  | chr5 | 195330/C//T                | synonymous    | 0 | 2 |
| DNAH5    | chr5 | 13727761/G//A              | nonsynonymous | 0 | 2 |
| C5orf42  | chr5 | 37120365/T//C              | nonsynonymous | 0 | 2 |
| FGF10    | chr5 | 44310536/T//C              | nonsynonymous | 0 | 2 |
| ENC1     | chr5 | 73930728/C//A              | nonsynonymous | 0 | 2 |
| DMGDH    | chr5 | 78359526/C//A              | synonymous    | 0 | 2 |
| LRRTM2   | chr5 | 138209756/C//T             | nonsynonymous | 0 | 2 |
| PCDHA5   | chr5 | 140201654/G//C             | nonsynonymous | 0 | 2 |
| PCDHA12  | chr5 | 140257229/A//T             | synonymous    | 0 | 2 |
| PCDHGA2  | chr5 | 140719343/G//T             | nonsynonymous | 0 | 2 |
| FAT2     | chr5 | 150923673/AATCC//A         | nonsynonymous | 0 | 2 |
| SGCD     | chr5 | 156016263/C//G             | nonsynonymous | 0 | 2 |
| NEURL1B  | chr5 | 172097297/G//A             | nonsynonymous | 0 | 2 |
| KIF13A   | chr6 | 17850576/G//A              | nonsynonymous | 0 | 2 |
| SLC17A2  | chr6 | 25921623/C//A              | nonsynonymous | 0 | 2 |
| B3GALT4  | chr6 | 33245316/G//A              | synonymous    | 0 | 2 |
| SCUBE3   | chr6 | 35182162/G//C              | synonymous    | 0 | 2 |
| ADGRF5   | chr6 | 46846090/C//A              | nonsynonymous | 0 | 2 |
| ADGRB3   | chr6 | 70071191/C//A              | nonsynonymous | 0 | 2 |
| ZNF292   | chr6 | 87926095/G//T              | nonsynonymous | 0 | 2 |
| ZNF292   | chr6 | 87968755/A//T              | nonsynonymous | 0 | 2 |
| HACE1    | chr6 | 105192060/G//C             | nonsynonymous | 0 | 2 |
| MAN1A1   | chr6 | 119510982/C//A             | nonsynonymous | 0 | 2 |
| TBC1D32  | chr6 | 121481167/C//A             | nonsynonymous | 0 | 2 |
| GJA1     | chr6 | 121768065/G//T             | synonymous    | 0 | 2 |
| ECHDC1   | chr6 | 127611343/G//A             | synonymous    | 0 | 2 |
|          | chr6 | 135518099/G//A             | synonymous    | 0 | 2 |
| AKAP12   | chr6 | 151672372/C//T             | nonsynonymous | 0 | 2 |
| DNAAF5   | chr7 | 796442/C//T                | synonymous    | 0 | 2 |

|          |       |                        |               |   |   |
|----------|-------|------------------------|---------------|---|---|
| ABCB5    | chr7  | 20782651/C//T          | nonsynonymous | 0 | 2 |
| HOXA3    | chr7  | 27147985/G//A          | nonsynonymous | 0 | 2 |
| PSMA2    | chr7  | 42964290/C//G          | nonsynonymous | 0 | 2 |
| ADCY1    | chr7  | 45719357/G//A          | nonsynonymous | 0 | 2 |
| ZNF736   | chr7  | 63809190/G//A          | nonsynonymous | 0 | 2 |
| CRCP     | chr7  | 65610434/G//C          | nonsynonymous | 0 | 2 |
| BAZ1B    | chr7  | 72879800/C//T          | nonsynonymous | 0 | 2 |
| DNAJC30  | chr7  | 73097423/C//T          | nonsynonymous | 0 | 2 |
| SEMA3E   | chr7  | 83022004/C//A          | nonsynonymous | 0 | 2 |
| MUC12    | chr7  | 100635924/G//C         | nonsynonymous | 0 | 2 |
| MUC12    | chr7  | 100639173/G//T         | nonsynonymous | 0 | 2 |
| DENND2A  | chr7  | 140301681/C//A         | nonsynonymous | 0 | 2 |
| MGAM     | chr7  | 141721445/T//A         | nonsynonymous | 0 | 2 |
| CNTNAP2  | chr7  | 146805445/GTGTCTGAC//G | synonymous    | 0 | 2 |
| GIMAP7   | chr7  | 150217384/G//T         | nonsynonymous | 0 | 2 |
| WDR60    | chr7  | 158716333/C//T         | synonymous    | 0 | 2 |
| FER1L6   | chr8  | 124989684/G//A         | nonsynonymous | 0 | 2 |
| GNAQ     | chr9  | 80343579/C//T          | nonsynonymous | 0 | 2 |
| MFSD14B  | chr9  | 97216303/G//T          | nonsynonymous | 0 | 2 |
| TRIM32   | chr9  | 119460300/G//A         | synonymous    | 0 | 2 |
| TRAF1    | chr9  | 123685978/C//A         | synonymous    | 0 | 2 |
| SPTAN1   | chr9  | 131381207/G//C         | nonsynonymous | 0 | 2 |
| PARD3    | chr10 | 34606204/G//A          | nonsynonymous | 0 | 2 |
| CHAT     | chr10 | 50863203/G//T          | nonsynonymous | 0 | 2 |
| PANK1    | chr10 | 91344155/G//T          | synonymous    | 0 | 2 |
| DENND5A  | chr11 | 9161193/C//G           | synonymous    | 0 | 2 |
| COMMD9   | chr11 | 36300094/C//A          | nonsynonymous | 0 | 2 |
| VWCE     | chr11 | 61026625/T//C          | nonsynonymous | 0 | 2 |
| EHBP1L1  | chr11 | 65351795/C//T          | synonymous    | 0 | 2 |
| C11orf24 | chr11 | 68030122/G//A          | nonsynonymous | 0 | 2 |
| MSANTD4  | chr11 | 105880290/C//A         | nonsynonymous | 0 | 2 |
| DIXDC1   | chr11 | 111863143/C//A         | nonsynonymous | 0 | 2 |
| DDX6     | chr11 | 118633971/T//C         | nonsynonymous | 0 | 2 |
| FOXR1    | chr11 | 118849839/G//A         | synonymous    | 0 | 2 |
|          | chr12 | 9162198/C//T           | synonymous    | 0 | 2 |
| LRRK2    | chr12 | 40681212/G//C          | nonsynonymous | 0 | 2 |
| PDZRN4   | chr12 | 41967501/A//T          | nonsynonymous | 0 | 2 |
| PFKM     | chr12 | 48528805/C//T          | nonsynonymous | 0 | 2 |
| KRT73    | chr12 | 53009113/C//G          | nonsynonymous | 0 | 2 |
| LRP1     | chr12 | 57605541/C//T          | nonsynonymous | 0 | 2 |
| LRIG3    | chr12 | 59266449/T//A          | nonsynonymous | 0 | 2 |
| WIF1     | chr12 | 65462568/T//C          | nonsynonymous | 0 | 2 |
| TPH2     | chr12 | 72335519/T//C          | synonymous    | 0 | 2 |
| SLC6A15  | chr12 | 85279727/C//T          | nonsynonymous | 0 | 2 |
| MYO1H    | chr12 | 109831146/G//A         | nonsynonymous | 0 | 2 |
| ATP2A2   | chr12 | 110719673/G//T         | nonsynonymous | 0 | 2 |
| TAOK3    | chr12 | 118673480/T//C         | synonymous    | 0 | 2 |
| TMEM132D | chr12 | 130184843/G//A         | synonymous    | 0 | 2 |
| PRMT5    | chr14 | 23392361/C//T          | nonsynonymous | 0 | 2 |
| EIF2S1   | chr14 | 67850094/A//C          | nonsynonymous | 0 | 2 |
| APBA2    | chr15 | 29346594/G//T          | nonsynonymous | 0 | 2 |
| STRC     | chr15 | 43896890/G//A          | nonsynonymous | 0 | 2 |
| PLEKHO2  | chr15 | 65157293/G//T          | nonsynonymous | 0 | 2 |
| CCDC33   | chr15 | 74623065/G//T          | synonymous    | 0 | 2 |
| SCAPER   | chr15 | 76646320/C//T          | nonsynonymous | 0 | 2 |
| SLC28A1  | chr15 | 85478634/T//C          | nonsynonymous | 0 | 2 |
| CLUAP1   | chr16 | 3558304/A//T           | nonsynonymous | 0 | 2 |
| VASN     | chr16 | 4432309/C//T           | synonymous    | 0 | 2 |
| ZNF500   | chr16 | 4802874/G//A           | nonsynonymous | 0 | 2 |
| ACSM2B   | chr16 | 20576092/T//G          | nonsynonymous | 0 | 2 |
| KCTD13   | chr16 | 29923187/G//C          | nonsynonymous | 0 | 2 |
| ZNF646   | chr16 | 31089024/T//A          | nonsynonymous | 0 | 2 |
| BCKDK    | chr16 | 31123520/C//T          | synonymous    | 0 | 2 |
| IRX3     | chr16 | 54318187/G//C          | synonymous    | 0 | 2 |
| NUP93    | chr16 | 56792525/C//T          | synonymous    | 0 | 2 |
| FANCA    | chr16 | 89807252/A//T          | nonsynonymous | 0 | 2 |
| SUPT6H   | chr17 | 27011601/C//G          | synonymous    | 0 | 2 |
| GAS2L2   | chr17 | 34073409/G//C          | nonsynonymous | 0 | 2 |
| RAPGEFL1 | chr17 | 38347691/G//A          | nonsynonymous | 0 | 2 |
| NOG      | chr17 | 54672271/G//C          | nonsynonymous | 0 | 2 |

|          |       |                      |               |   |   |
|----------|-------|----------------------|---------------|---|---|
| BRIP1    | chr17 | 59926496/T//C        | synonymous    | 0 | 2 |
| CCDC102B | chr18 | 66504364/C//A        | nonsynonymous | 0 | 2 |
| APC2     | chr19 | 1460800/G//A         | nonsynonymous | 0 | 2 |
| ICAM4    | chr19 | 10397957/C//T        | nonsynonymous | 0 | 2 |
| CYP4F11  | chr19 | 16038057/T//A        | nonsynonymous | 0 | 2 |
| SLC27A1  | chr19 | 17611395/G//GATCGCCC | nonsynonymous | 0 | 2 |
| KIAA1683 | chr19 | 18380336/C//T        | synonymous    | 0 | 2 |
| ZNF100   | chr19 | 21910152/T//A        | nonsynonymous | 0 | 2 |
| ATP4A    | chr19 | 36051416/G//C        | synonymous    | 0 | 2 |
| LRFN3    | chr19 | 36435557/C//T        | nonsynonymous | 0 | 2 |
| GLTSCR1  | chr19 | 48198221/C//A        | nonsynonymous | 0 | 2 |
| ETFB     | chr19 | 51869586/C//A        | synonymous    | 0 | 2 |
| ZNF480   | chr19 | 52825031/C//G        | synonymous    | 0 | 2 |
| ZNF480   | chr19 | 52825979/C//T        | synonymous    | 0 | 2 |
| ZNF160   | chr19 | 53572094/A//C        | nonsynonymous | 0 | 2 |
| CACNG6   | chr19 | 54515274/C//T        | nonsynonymous | 0 | 2 |
| KIR2DL4  | chr19 | 55325335/A//T        | synonymous    | 0 | 2 |
| NLRP4    | chr19 | 56379095/C//T        | nonsynonymous | 0 | 2 |
| ZFP28    | chr19 | 57059217/C//G        | nonsynonymous | 0 | 2 |
| ZNF256   | chr19 | 58452652/T//A        | nonsynonymous | 0 | 2 |
| TMPRSS15 | chr21 | 19687493/A//C        | nonsynonymous | 0 | 2 |
| DSCAM    | chr21 | 41505937/C//A        | nonsynonymous | 0 | 2 |
|          | chr21 | 47966983/G//T        | synonymous    | 0 | 2 |
| SLC7A4   | chr22 | 21384630/G//T        | synonymous    | 0 | 2 |
| MYO18B   | chr22 | 26423196/T//C        | nonsynonymous | 0 | 2 |
| HPS4     | chr22 | 26860432/G//C        | synonymous    | 0 | 2 |
| CRYBA4   | chr22 | 27021525/G//T        | nonsynonymous | 0 | 2 |
| PPARA    | chr22 | 46611128/C//T        | synonymous    | 0 | 2 |
| SSX1     | chrX  | 48117228/G//T        | nonsynonymous | 0 | 2 |
| STARD8   | chrX  | 67943857/G//A        | nonsynonymous | 0 | 2 |
| GABRA3   | chrX  | 151358237/C//T       | nonsynonymous | 0 | 2 |
| PRR36    | chr19 | 7935904/C//T         | synonymous    | 0 | 2 |
| ZMYM6    | chr1  | 35452689/A//T        | synonymous    | 0 | 2 |
| CDC14A   | chr1  | 100819342/G//A       | nonsynonymous | 0 | 2 |
| ATP1A2   | chr1  | 160093812/A//C       | nonsynonymous | 0 | 2 |
| COPA     | chr1  | 160303427/G//A       | nonsynonymous | 0 | 2 |
| IGFN1    | chr1  | 201181634/C//A       | nonsynonymous | 0 | 2 |
| LRP1B    | chr2  | 142004815/C//G       | nonsynonymous | 0 | 2 |
| SPEG     | chr2  | 220346067/C//T       | nonsynonymous | 0 | 2 |
| NMUR1    | chr2  | 232393209/G//A       | nonsynonymous | 0 | 2 |
| BTD      | chr3  | 15686990/G//C        | nonsynonymous | 0 | 2 |
| C3orf30  | chr3  | 118865366/G//A       | synonymous    | 0 | 2 |
| TRH      | chr3  | 129694770/G//A       | synonymous    | 0 | 2 |
| ZIC4     | chr3  | 147108954/G//A       | synonymous    | 0 | 2 |
| DRD5     | chr4  | 9784102/G//A         | nonsynonymous | 0 | 2 |
|          | chr5  | 134028852/G//A       | synonymous    | 0 | 2 |
| ADAMTS2  | chr5  | 178585812/G//C       | synonymous    | 0 | 2 |
| FAM50B   | chr6  | 3850366/G//A         | synonymous    | 0 | 2 |
| DAXX     | chr6  | 33287481/G//A        | nonsynonymous | 0 | 2 |
| BTBD9    | chr6  | 38142862/C//T        | nonsynonymous | 0 | 2 |
| PTPRK    | chr6  | 128330321/C//A       | nonsynonymous | 0 | 2 |
| MMP16    | chr8  | 89198809/T//C        | synonymous    | 0 | 2 |
| PCSK5    | chr9  | 78973641/T//G        | nonsynonymous | 0 | 2 |
| COQ4     | chr9  | 131094451/G//A       | nonsynonymous | 0 | 2 |
| ANKRD16  | chr10 | 5931047/G//C         | nonsynonymous | 0 | 2 |
| KCNMA1   | chr10 | 78709082/C//T        | nonsynonymous | 0 | 2 |
| IFIT5    | chr10 | 91177038/G//A        | nonsynonymous | 0 | 2 |
|          | chr10 | 100189321/G//A       | synonymous    | 0 | 2 |
| DMBT1    | chr10 | 124336178/C//T       | nonsynonymous | 0 | 2 |
| OR8H1    | chr11 | 56058235/A//C        | nonsynonymous | 0 | 2 |
| TMEM151A | chr11 | 66061833/G//A        | nonsynonymous | 0 | 2 |
| LRRC32   | chr11 | 76371084/C//T        | nonsynonymous | 0 | 2 |
| CCDC15   | chr11 | 124829104/G//T       | nonsynonymous | 0 | 2 |
| FOXRED1  | chr11 | 126142927/A//T       | nonsynonymous | 0 | 2 |
| SMAD9    | chr13 | 37453645/C//A        | nonsynonymous | 0 | 2 |
| EPB42    | chr15 | 43507442/A//G        | nonsynonymous | 0 | 2 |
| HAPLN3   | chr15 | 89424919/G//A        | synonymous    | 0 | 2 |
| ADAMTS17 | chr15 | 100695429/G//A       | synonymous    | 0 | 2 |
| IFT140   | chr16 | 1621437/A//G         | synonymous    | 0 | 2 |
| KRTAP2-4 | chr17 | 39222021/C//T        | nonsynonymous | 0 | 2 |

|                |       |                  |               |   |   |
|----------------|-------|------------------|---------------|---|---|
| HSF5           | chr17 | 56565479/G//T    | nonsynonymous | 0 | 2 |
| TTYH2          | chr17 | 72218654/G//A    | nonsynonymous | 0 | 2 |
| POTEC          | chr18 | 14542786/C//T    | nonsynonymous | 0 | 2 |
| NOTCH3         | chr19 | 15281362/C//A    | nonsynonymous | 0 | 2 |
| FOSB           | chr19 | 45975949/G//A    | synonymous    | 0 | 2 |
| GPCPD1         | chr20 | 5574004/C//T     | nonsynonymous | 0 | 2 |
| BPIFB1         | chr20 | 31876575/C//T    | synonymous    | 0 | 2 |
| TPST2          | chr22 | 26937597/G//A    | synonymous    | 0 | 2 |
| TEF            | chr22 | 41783512/G//A    | nonsynonymous | 0 | 2 |
| TRO            | chrX  | 54957032/G//T    | nonsynonymous | 0 | 2 |
| TRPC5OS        | chrX  | 111145167/C//A   | nonsynonymous | 0 | 2 |
| TENM1          | chrX  | 123680906/A//G   | synonymous    | 0 | 2 |
| PDZD4          | chrX  | 153072259/G//T   | nonsynonymous | 0 | 2 |
| CACNA1E        | chr1  | 181725204/G//A   | nonsynonymous | 0 | 2 |
| RABIF          | chr1  | 202858196/C//G   | nonsynonymous | 0 | 2 |
| HHAT           | chr1  | 210577873/G//C   | synonymous    | 0 | 2 |
| HHAT           | chr1  | 210577884/G//A   | nonsynonymous | 0 | 2 |
| LYPLAL1        | chr1  | 219352561/A//G   | nonsynonymous | 0 | 2 |
| OR1C1          | chr1  | 247921569/G//A   | nonsynonymous | 0 | 2 |
| TCF23          | chr2  | 27372140/G//T    | nonsynonymous | 0 | 2 |
| BCL11A         | chr2  | 60688585/C//T    | nonsynonymous | 0 | 2 |
| TMEM131        | chr2  | 98418376/A//G    | synonymous    | 0 | 2 |
| MCM6           | chr2  | 136615535/G//A   | nonsynonymous | 0 | 2 |
| ZEB2           | chr2  | 145158873/T//C   | nonsynonymous | 0 | 2 |
| PHOSPHO2-KLHL2 | chr2  | 170592513/C//T   | nonsynonymous | 0 | 2 |
| FAM171B        | chr2  | 187627527/C//T   | nonsynonymous | 0 | 2 |
| ATP2B2         | chr3  | 10382299/C//T    | nonsynonymous | 0 | 2 |
| EPHA3          | chr3  | 89390994/C//T    | nonsynonymous | 0 | 2 |
| TBC1D23        | chr3  | 100009514/A//G   | nonsynonymous | 0 | 2 |
| DNAJC13        | chr3  | 132207301/G//C   | synonymous    | 0 | 2 |
| HLTF           | chr3  | 148782618/T//C   | synonymous    | 0 | 2 |
| BCHE           | chr3  | 165548715/G//T   | nonsynonymous | 0 | 2 |
| DRD5           | chr4  | 9783995/C//T     | synonymous    | 0 | 2 |
| AASDH          | chr4  | 57250290/C//T    | nonsynonymous | 0 | 2 |
| ADCY2          | chr5  | 7709491/C//A     | synonymous    | 0 | 2 |
| IPO11          | chr5  | 61833035/G//C    | nonsynonymous | 0 | 2 |
| HTR1A          | chr5  | 63257256/C//T    | synonymous    | 0 | 2 |
| RASGRF2        | chr5  | 80419488/G//A    | nonsynonymous | 0 | 2 |
| RAPGEF6        | chr5  | 130766824/T//A   | nonsynonymous | 0 | 2 |
| PCDHB2         | chr5  | 140474741/C//A   | nonsynonymous | 0 | 2 |
| ERGIC1         | chr5  | 172353544/C//G   | synonymous    | 0 | 2 |
| HLA-DRB1       | chr6  | 32548553/C//T    | nonsynonymous | 0 | 2 |
| RIMS1          | chr6  | 73110320/G//A    | synonymous    | 0 | 2 |
| MYO6           | chr6  | 76624606/G//T    | nonsynonymous | 0 | 2 |
| PHIP           | chr6  | 79679812/G//A    | synonymous    | 0 | 2 |
| UBE2J1         | chr6  | 90039567/C//T    | nonsynonymous | 0 | 2 |
| FBXO30         | chr6  | 146127135/A//T   | nonsynonymous | 0 | 2 |
| GRM1           | chr6  | 146350523/C//T   | synonymous    | 0 | 2 |
| SDK1           | chr7  | 4304862/G//A     | nonsynonymous | 0 | 2 |
| AMPH           | chr7  | 38574566/ACTG//A | nonsynonymous | 0 | 2 |
| IGFBP3         | chr7  | 45956889/G//A    | nonsynonymous | 0 | 2 |
| IKZF1          | chr7  | 50455075/C//T    | nonsynonymous | 0 | 2 |
| ADRA1A         | chr8  | 26721942/G//A    | nonsynonymous | 0 | 2 |
| TEX15          | chr8  | 30702140/T//C    | nonsynonymous | 0 | 2 |
| SPATA31D1      | chr9  | 84605873/C//G    | nonsynonymous | 0 | 2 |
| ZNF883         | chr9  | 115759644/T//C   | nonsynonymous | 0 | 2 |
| NET1           | chr10 | 5498724/G//A     | nonsynonymous | 0 | 2 |
| CUBN           | chr10 | 16878276/C//T    | nonsynonymous | 0 | 2 |
|                | chr10 | 55568933/G//C    | synonymous    | 0 | 2 |
| MMP26          | chr11 | 5010966/G//A     | nonsynonymous | 0 | 2 |
| TRIM3          | chr11 | 6477532/C//T     | nonsynonymous | 0 | 2 |
| TTC17          | chr11 | 43425627/C//G    | nonsynonymous | 0 | 2 |
| TENM4          | chr11 | 78383335/C//T    | nonsynonymous | 0 | 2 |
| ARHGEF25       | chr12 | 58009799/C//T    | synonymous    | 0 | 2 |
| LRRC10         | chr12 | 70004478/G//A    | synonymous    | 0 | 2 |
| RASSF9         | chr12 | 86199651/C//T    | nonsynonymous | 0 | 2 |
| SACS           | chr13 | 23912440/G//A    | nonsynonymous | 0 | 2 |
|                | chr13 | 33017007/A//T    | synonymous    | 0 | 2 |
| PCDH8          | chr13 | 53420657/G//A    | nonsynonymous | 0 | 2 |
| RBM23          | chr14 | 23375531/G//A    | nonsynonymous | 0 | 2 |

|          |       |                   |               |   |   |
|----------|-------|-------------------|---------------|---|---|
| GOLGA5   | chr14 | 93273121/G//A     | synonymous    | 0 | 2 |
| C15orf65 | chr15 | 55710805/T//A     | synonymous    | 0 | 2 |
| CSPG4    | chr15 | 75979962/G//A     | synonymous    | 0 | 2 |
| FOXL1    | chr16 | 86612665/C//T     | synonymous    | 0 | 2 |
| MYH1     | chr17 | 10399369/G//A     | synonymous    | 0 | 2 |
| LIG3     | chr17 | 33323178/C//T     | synonymous    | 0 | 2 |
| WNK4     | chr17 | 40947112/G//A     | synonymous    | 0 | 2 |
| PTPRS    | chr19 | 5222888/G//T      | nonsynonymous | 0 | 2 |
| COL5A3   | chr19 | 10102709/C//A     | nonsynonymous | 0 | 2 |
| RHPN2    | chr19 | 33481570/T//G     | synonymous    | 0 | 2 |
| HIPK4    | chr19 | 40886406/C//T     | nonsynonymous | 0 | 2 |
| PLEKHA4  | chr19 | 49364680/C//T     | nonsynonymous | 0 | 2 |
| BRSK1    | chr19 | 55805499/C//T     | synonymous    | 0 | 2 |
| GIN51    | chr20 | 25388437/G//T     | synonymous    | 0 | 2 |
| SLC5A3   | chr21 | 35469024/C//G     | nonsynonymous | 0 | 2 |
| DSCAM    | chr21 | 41684283/G//A     | nonsynonymous | 0 | 2 |
| TAB3     | chrX  | 30870896/G//A     | nonsynonymous | 0 | 2 |
| IL1RAPL2 | chrX  | 104984676/G//A    | nonsynonymous | 0 | 2 |
| LRCH2    | chrX  | 114357746/C//T    | nonsynonymous | 0 | 2 |
| ENOX2    | chrX  | 129813701/C//T    | nonsynonymous | 0 | 2 |
| KLHL21   | chr1  | 6662343/C//T      | nonsynonymous | 0 | 2 |
| PAX7     | chr1  | 19018316/C//T     | nonsynonymous | 0 | 2 |
| FAM46B   | chr1  | 27332410/C//T     | synonymous    | 0 | 2 |
| TFAP2E   | chr1  | 36060042/C//T     | nonsynonymous | 0 | 2 |
| SSX2IP   | chr1  | 85121602/T//G     | nonsynonymous | 0 | 2 |
| PLPPR4   | chr1  | 99772097/G//A     | nonsynonymous | 0 | 2 |
| COL11A1  | chr1  | 103385866/C//A    | nonsynonymous | 0 | 2 |
| HRNR     | chr1  | 152191000/T//G    | synonymous    | 0 | 2 |
| TP53BP2  | chr1  | 223983550/C//T    | synonymous    | 0 | 2 |
| TARBP1   | chr1  | 234565962/T//A    | nonsynonymous | 0 | 2 |
| PRR30    | chr2  | 27360213/G//A     | nonsynonymous | 0 | 2 |
| NRBP1    | chr2  | 27664736/C//T     | synonymous    | 0 | 2 |
| EGR4     | chr2  | 73520484/G//T     | synonymous    | 0 | 2 |
| NPAS2    | chr2  | 101565821/C//T    | synonymous    | 0 | 2 |
| IWS1     | chr2  | 128263135/T//C    | nonsynonymous | 0 | 2 |
| NGEF     | chr2  | 233756165/G//A    | nonsynonymous | 0 | 2 |
| FANCD2   | chr3  | 10107162/G//T     | nonsynonymous | 0 | 2 |
| PLCL2    | chr3  | 17051564/G//T     | nonsynonymous | 0 | 2 |
| IQCF6    | chr3  | 51812781/C//T     | nonsynonymous | 0 | 2 |
| LRIG1    | chr3  | 66463428/G//A     | nonsynonymous | 0 | 2 |
| ALDH1L1  | chr3  | 125854473/G//T    | synonymous    | 0 | 2 |
| STAG1    | chr3  | 136342065/G//A    | nonsynonymous | 0 | 2 |
| PCOLCE2  | chr3  | 142539743/T//G    | nonsynonymous | 0 | 2 |
| ARHGEF26 | chr3  | 153840779/CGAA//C | nonsynonymous | 0 | 2 |
| C3orf80  | chr3  | 159943551/G//A    | synonymous    | 0 | 2 |
| UNC5C    | chr4  | 96166179/A//T     | nonsynonymous | 0 | 2 |
| ZDHHC11  | chr5  | 825275/T//G       | synonymous    | 0 | 2 |
| ADAMTS16 | chr5  | 5319237/A//G      | nonsynonymous | 0 | 2 |
| FER      | chr5  | 108207871/A//T    | nonsynonymous | 0 | 2 |
| APC      | chr5  | 112170863/G//C    | nonsynonymous | 0 | 2 |
| RANBP17  | chr5  | 170336775/T//G    | synonymous    | 0 | 2 |
| TUBB2B   | chr6  | 3225036/C//T      | synonymous    | 0 | 2 |
| DDR1     | chr6  | 30859898/G//T     | nonsynonymous | 0 | 2 |
| EYA4     | chr6  | 133783809/A//C    | nonsynonymous | 0 | 2 |
| TRA2A    | chr7  | 23555997/T//C     | synonymous    | 0 | 2 |
| POU6F2   | chr7  | 39491228/G//A     | nonsynonymous | 0 | 2 |
| PTPRZ1   | chr7  | 121652219/C//T    | nonsynonymous | 0 | 2 |
| PAXIP1   | chr7  | 154735869/T//G    | nonsynonymous | 0 | 2 |
| AGPAT5   | chr8  | 6614704/A//T      | nonsynonymous | 0 | 2 |
| SGCZ     | chr8  | 13947906/G//A     | synonymous    | 0 | 2 |
| SCARA3   | chr8  | 27516511/C//T     | nonsynonymous | 0 | 2 |
| DPY19L4  | chr8  | 95800154/G//T     | nonsynonymous | 0 | 2 |
| ADCY8    | chr8  | 131916248/C//T    | nonsynonymous | 0 | 2 |
| GPT      | chr8  | 145731400/C//T    | nonsynonymous | 0 | 2 |
| CCDC171  | chr9  | 15920344/C//T     | nonsynonymous | 0 | 2 |
| RUSC2    | chr9  | 35547005/C//T     | nonsynonymous | 0 | 2 |
| TNC      | chr9  | 117783543/C//T    | nonsynonymous | 0 | 2 |
| ABO      | chr9  | 136131623/C//T    | synonymous    | 0 | 2 |
| GPR158   | chr10 | 25886785/C//T     | nonsynonymous | 0 | 2 |
| RET      | chr10 | 43598033/A//T     | nonsynonymous | 0 | 2 |



|          |       |                |               |   |   |
|----------|-------|----------------|---------------|---|---|
| SLIT1    | chr10 | 98803205/C//T  | nonsynonymous | 0 | 2 |
| OR52K2   | chr11 | 4471063/T//G   | nonsynonymous | 0 | 2 |
| STK33    | chr11 | 8478918/C//T   | nonsynonymous | 0 | 2 |
| KIF18A   | chr11 | 28083996/C//A  | nonsynonymous | 0 | 2 |
| MMP13    | chr11 | 102825296/G//A | synonymous    | 0 | 2 |
| OR6C74   | chr12 | 55641682/C//T  | nonsynonymous | 0 | 2 |
| KCNC2    | chr12 | 75601181/C//T  | nonsynonymous | 0 | 2 |
| FGD6     | chr12 | 95603024/A//G  | nonsynonymous | 0 | 2 |
| DNAH10   | chr12 | 124289591/A//G | synonymous    | 0 | 2 |
| CCDC168  | chr13 | 103399818/A//T | nonsynonymous | 0 | 2 |
| RNASE10  | chr14 | 20979164/C//A  | nonsynonymous | 0 | 2 |
| POLG     | chr15 | 89864365/C//T  | nonsynonymous | 0 | 2 |
| BLM      | chr15 | 91334019/C//G  | nonsynonymous | 0 | 2 |
| HAGHL    | chr16 | 779377/C//T    | synonymous    | 0 | 2 |
| ABCA3    | chr16 | 2347759/C//T   | synonymous    | 0 | 2 |
| VWA3A    | chr16 | 22161155/C//T  | nonsynonymous | 0 | 2 |
| MT4      | chr16 | 56601692/A//T  | nonsynonymous | 0 | 2 |
| MMP15    | chr16 | 58075691/C//T  | nonsynonymous | 0 | 2 |
| SPDYE4   | chr17 | 8661682/G//A   | nonsynonymous | 0 | 2 |
| MYO15A   | chr17 | 18022899/C//T  | nonsynonymous | 0 | 2 |
| CDR2L    | chr17 | 72999691/C//G  | nonsynonymous | 0 | 2 |
| LRR30    | chr18 | 7231425/G//A   | nonsynonymous | 0 | 2 |
| ANKRD12  | chr18 | 9257562/G//A   | nonsynonymous | 0 | 2 |
| DSG3     | chr18 | 29044263/A//C  | nonsynonymous | 0 | 2 |
| PRR36    | chr19 | 7938477/G//A   | nonsynonymous | 0 | 2 |
| MAP2K7   | chr19 | 7975375/G//A   | nonsynonymous | 0 | 2 |
| CRTC1    | chr19 | 18870996/G//A  | nonsynonymous | 0 | 2 |
| LIN7B    | chr19 | 49618159/C//T  | nonsynonymous | 0 | 2 |
| LILRA1   | chr19 | 55106724/G//A  | nonsynonymous | 0 | 2 |
| ZNF667   | chr19 | 56973772/G//T  | synonymous    | 0 | 2 |
| PROKR2   | chr20 | 5282748/G//T   | nonsynonymous | 0 | 2 |
| TSSK2    | chr22 | 19119027/G//A  | nonsynonymous | 0 | 2 |
| NLGN4X   | chrX  | 5810849/A//T   | synonymous    | 0 | 2 |
| ASB11    | chrX  | 15307658/C//A  | nonsynonymous | 0 | 2 |
| BRWD3    | chrX  | 80049264/G//A  | nonsynonymous | 0 | 2 |
| TEX13B   | chrX  | 107225343/A//C | synonymous    | 0 | 2 |
| NPHP4    | chr1  | 5937242/C//T   | nonsynonymous | 0 | 2 |
| CAMTA1   | chr1  | 7737741/C//A   | synonymous    | 0 | 2 |
| DISP3    | chr1  | 11561566/C//A  | nonsynonymous | 0 | 2 |
| FBLIM1   | chr1  | 16101295/C//T  | synonymous    | 0 | 2 |
| ALDH4A1  | chr1  | 19208250/C//A  | synonymous    | 0 | 2 |
| ALDH4A1  | chr1  | 19208347/G//A  | nonsynonymous | 0 | 2 |
| PINK1    | chr1  | 20964476/A//G  | nonsynonymous | 0 | 2 |
| KIF17    | chr1  | 21031094/G//T  | synonymous    | 0 | 2 |
| SLC9A1   | chr1  | 27480705/G//A  | nonsynonymous | 0 | 2 |
| IFI6     | chr1  | 27994825/C//T  | synonymous    | 0 | 2 |
| RAB42    | chr1  | 28920511/C//T  | nonsynonymous | 0 | 2 |
| HDAC1    | chr1  | 32768278/C//T  | nonsynonymous | 0 | 2 |
| ZMYM6    | chr1  | 35476197/C//A  | nonsynonymous | 0 | 2 |
| ZC3H12A  | chr1  | 37949109/C//T  | nonsynonymous | 0 | 2 |
| EIF2B3   | chr1  | 45316624/C//A  | nonsynonymous | 0 | 2 |
| TRABD2B  | chr1  | 48460088/G//A  | nonsynonymous | 0 | 2 |
| ACOT11   | chr1  | 55070012/C//G  | synonymous    | 0 | 2 |
| PCSK9    | chr1  | 55524212/G//A  | synonymous    | 0 | 2 |
| DAB1     | chr1  | 57480925/C//A  | nonsynonymous | 0 | 2 |
| DAB1     | chr1  | 57610966/G//T  | synonymous    | 0 | 2 |
| C1orf87  | chr1  | 60503678/G//C  | synonymous    | 0 | 2 |
| INSL5    | chr1  | 67266822/A//G  | nonsynonymous | 0 | 2 |
| C1orf141 | chr1  | 67559071/T//C  | nonsynonymous | 0 | 2 |
| C1orf141 | chr1  | 67559104/T//A  | nonsynonymous | 0 | 2 |
| LRR30    | chr1  | 70300505/C//T  | synonymous    | 0 | 2 |
| ERICH3   | chr1  | 75055471/C//A  | nonsynonymous | 0 | 2 |
| ERICH3   | chr1  | 75065541/G//A  | nonsynonymous | 0 | 2 |
| CLCA2    | chr1  | 86891142/C//A  | nonsynonymous | 0 | 2 |
| ABCA4    | chr1  | 94463655/C//A  | nonsynonymous | 0 | 2 |
| VAV3     | chr1  | 108145715/C//A | nonsynonymous | 0 | 2 |
| SLC25A24 | chr1  | 108728453/C//A | nonsynonymous | 0 | 2 |
| KCNC4    | chr1  | 110775540/C//T | synonymous    | 0 | 2 |
| DENND2C  | chr1  | 115130484/C//G | nonsynonymous | 0 | 2 |
| SPTA1    | chr1  | 158596683/C//A | nonsynonymous | 0 | 2 |

|           |      |                |               |   |   |
|-----------|------|----------------|---------------|---|---|
| PCP4L1    | chr1 | 161228741/C//T | synonymous    | 0 | 2 |
| FCGR2B    | chr1 | 161641416/C//A | nonsynonymous | 0 | 2 |
| SUCO      | chr1 | 172558660/A//G | nonsynonymous | 0 | 2 |
| TNN       | chr1 | 175066710/G//T | nonsynonymous | 0 | 2 |
| PAPPA2    | chr1 | 176659272/G//A | nonsynonymous | 0 | 2 |
| BRINP3    | chr1 | 190250828/G//T | nonsynonymous | 0 | 2 |
| CFHR2     | chr1 | 196920047/G//A | nonsynonymous | 0 | 2 |
| KIF21B    | chr1 | 200957978/G//A | nonsynonymous | 0 | 2 |
| PLXNA2    | chr1 | 208390188/G//A | synonymous    | 0 | 2 |
| PLXNA2    | chr1 | 208390500/G//A | synonymous    | 0 | 2 |
| FLVCR1    | chr1 | 213068638/A//C | synonymous    | 0 | 2 |
| TGFB2     | chr1 | 218520201/C//T | nonsynonymous | 0 | 2 |
| MARK1     | chr1 | 220823970/G//A | synonymous    | 0 | 2 |
| CCDC185   | chr1 | 223568024/G//A | nonsynonymous | 0 | 2 |
| CDC42BPA  | chr1 | 227504799/C//G | nonsynonymous | 0 | 2 |
| NID1      | chr1 | 236187393/C//A | nonsynonymous | 0 | 2 |
| NID1      | chr1 | 236189373/G//T | nonsynonymous | 0 | 2 |
| RYR2      | chr1 | 237711810/G//C | nonsynonymous | 0 | 2 |
| RYR2      | chr1 | 237872271/C//G | nonsynonymous | 0 | 2 |
| CEP170    | chr1 | 243349617/C//T | nonsynonymous | 0 | 2 |
| ZBTB18    | chr1 | 244218142/G//T | nonsynonymous | 0 | 2 |
| OR2L2     | chr1 | 248202201/C//T | nonsynonymous | 0 | 2 |
| TPO       | chr2 | 1499877/C//A   | nonsynonymous | 0 | 2 |
| MYT1L     | chr2 | 1893147/T//A   | nonsynonymous | 0 | 2 |
| RRM2      | chr2 | 10269445/G//T  | nonsynonymous | 0 | 2 |
| ITSN2     | chr2 | 24507633/T//A  | nonsynonymous | 0 | 2 |
| GAREM2    | chr2 | 26399320/G//T  | nonsynonymous | 0 | 2 |
| SLC5A6    | chr2 | 27428936/G//A  | synonymous    | 0 | 2 |
| CAD       | chr2 | 27460408/C//T  | nonsynonymous | 0 | 2 |
| C2orf16   | chr2 | 27803860/C//A  | nonsynonymous | 0 | 2 |
| PLB1      | chr2 | 28719012/G//T  | nonsynonymous | 0 | 2 |
| TTC27     | chr2 | 32983494/C//T  | nonsynonymous | 0 | 2 |
| VIT       | chr2 | 37035654/C//A  | nonsynonymous | 0 | 2 |
| SLC3A1    | chr2 | 44507966/G//T  | nonsynonymous | 0 | 2 |
| TSPYL6    | chr2 | 54482822/G//A  | nonsynonymous | 0 | 2 |
| ARHGAP25  | chr2 | 69049767/G//C  | nonsynonymous | 0 | 2 |
| NFU1      | chr2 | 69627624/C//G  | nonsynonymous | 0 | 2 |
| ATP6V1B1  | chr2 | 71186145/C//T  | synonymous    | 0 | 2 |
| EXOC6B    | chr2 | 72707805/G//A  | synonymous    | 0 | 2 |
| ALMS1     | chr2 | 73680192/G//T  | nonsynonymous | 0 | 2 |
| ACTG2     | chr2 | 74136174/C//A  | synonymous    | 0 | 2 |
| REG3G     | chr2 | 79254213/T//A  | synonymous    | 0 | 2 |
| CD8A      | chr2 | 87013091/A//T  | synonymous    | 0 | 2 |
| KRCC1     | chr2 | 88327507/G//A  | synonymous    | 0 | 2 |
| EIF2AK3   | chr2 | 88874656/C//A  | nonsynonymous | 0 | 2 |
| TGFBRAP1  | chr2 | 105924177/G//A | synonymous    | 0 | 2 |
| RANBP2    | chr2 | 109399042/T//C | synonymous    | 0 | 2 |
| RALB      | chr2 | 121043495/A//C | nonsynonymous | 0 | 2 |
| CNTNAP5   | chr2 | 125521714/C//G | synonymous    | 0 | 2 |
| GPR17     | chr2 | 128408808/C//A | nonsynonymous | 0 | 2 |
| THSD7B    | chr2 | 138169224/C//A | nonsynonymous | 0 | 2 |
| LRP1B     | chr2 | 141004680/G//T | nonsynonymous | 0 | 2 |
| KYNU      | chr2 | 143715202/C//A | synonymous    | 0 | 2 |
| NEB       | chr2 | 152522012/G//A | synonymous    | 0 | 2 |
| TANC1     | chr2 | 160050986/G//C | synonymous    | 0 | 2 |
| XIRP2     | chr2 | 168114653/G//T | synonymous    | 0 | 2 |
| TTN       | chr2 | 179402297/T//C | nonsynonymous | 0 | 2 |
| TTN       | chr2 | 179549401/G//A | nonsynonymous | 0 | 2 |
| RAPH1     | chr2 | 204322304/C//T | synonymous    | 0 | 2 |
| LOC200726 | chr2 | 207513444/T//A | nonsynonymous | 0 | 2 |
| METTL21A  | chr2 | 208489072/T//A | nonsynonymous | 0 | 2 |
| VWC2L     | chr2 | 215301413/G//C | nonsynonymous | 0 | 2 |
| WNT6      | chr2 | 219738418/C//G | nonsynonymous | 0 | 2 |
| CDK5R2    | chr2 | 219824473/C//A | synonymous    | 0 | 2 |
| SPEG      | chr2 | 220336622/G//T | nonsynonymous | 0 | 2 |
| SCG2      | chr2 | 224463552/T//A | nonsynonymous | 0 | 2 |
| FAM124B   | chr2 | 225244611/G//T | nonsynonymous | 0 | 2 |
| DOCK10    | chr2 | 225796334/C//A | nonsynonymous | 0 | 2 |
| COL4A3    | chr2 | 228137736/A//T | synonymous    | 0 | 2 |
| INPP5D    | chr2 | 233925096/C//A | synonymous    | 0 | 2 |

|         |      |                       |               |   |   |
|---------|------|-----------------------|---------------|---|---|
| SH3BP4  | chr2 | 235951082/A//G        | nonsynonymous | 0 | 2 |
| SH3BP4  | chr2 | 235961238/G//T        | synonymous    | 0 | 2 |
| IQCA1   | chr2 | 237276892/C//A        | nonsynonymous | 0 | 2 |
| PDCD1   | chr2 | 242794788/C//T        | nonsynonymous | 0 | 2 |
| KCNH8   | chr3 | 19295140/C//G         | synonymous    | 0 | 2 |
| KCNH8   | chr3 | 19322786/C//A         | nonsynonymous | 0 | 2 |
| EFHB    | chr3 | 19975181/C//T         | synonymous    | 0 | 2 |
| PDCD61P | chr3 | 33853613/A//T         | nonsynonymous | 0 | 2 |
| DNAH1   | chr3 | 52422631/C//T         | synonymous    | 0 | 2 |
| STAB1   | chr3 | 52554547/G//T         | nonsynonymous | 0 | 2 |
| ITIH4   | chr3 | 52852141/C//G         | nonsynonymous | 0 | 2 |
| CACNA1D | chr3 | 53839080/C//T         | nonsynonymous | 0 | 2 |
| WNT5A   | chr3 | 55508502/C//T         | nonsynonymous | 0 | 2 |
| LMOD3   | chr3 | 69168498/A//G         | synonymous    | 0 | 2 |
| BBX     | chr3 | 107429400/G//A        | synonymous    | 0 | 2 |
| POLQ    | chr3 | 121207300/C//A        | nonsynonymous | 0 | 2 |
| UROC1   | chr3 | 126216947/G//A        | nonsynonymous | 0 | 2 |
|         | chr3 | 126220685/C//A        | synonymous    | 0 | 2 |
| COL6A6  | chr3 | 130284164/C//A        | nonsynonymous | 0 | 2 |
| RASA2   | chr3 | 141292002/C//T        | nonsynonymous | 0 | 2 |
| SLC9A9  | chr3 | 143515708/A//T        | nonsynonymous | 0 | 2 |
| PLOD2   | chr3 | 145788891/G//A        | nonsynonymous | 0 | 2 |
| ZIC4    | chr3 | 147109029/C//T        | synonymous    | 0 | 2 |
| ZIC1    | chr3 | 147128730/G//T        | synonymous    | 0 | 2 |
| HPS3    | chr3 | 148857855/G//C        | nonsynonymous | 0 | 2 |
| TSC22D2 | chr3 | 150127997/AAAGCTCG//A | nonsynonymous | 0 | 2 |
| KCNAB1  | chr3 | 156170720/G//A        | nonsynonymous | 0 | 2 |
| MLF1    | chr3 | 158289059/C//T        | synonymous    | 0 | 2 |
| SI      | chr3 | 164786976/C//T        | nonsynonymous | 0 | 2 |
| LRR31   | chr3 | 169557760/G//A        | synonymous    | 0 | 2 |
| SLC2A2  | chr3 | 170732358/G//C        | nonsynonymous | 0 | 2 |
| PEX5L   | chr3 | 179526153/G//A        | synonymous    | 0 | 2 |
| LPP     | chr3 | 188426059/G//T        | nonsynonymous | 0 | 2 |
| NRROS   | chr3 | 196386837/G//T        | nonsynonymous | 0 | 2 |
| ZFYVE28 | chr4 | 2306969/G//T          | nonsynonymous | 0 | 2 |
| KDR     | chr4 | 55946139/G//T         | nonsynonymous | 0 | 2 |
| CENPC   | chr4 | 68384034/C//A         | nonsynonymous | 0 | 2 |
| GC      | chr4 | 72635114/C//T         | nonsynonymous | 0 | 2 |
| ANTXR2  | chr4 | 80899213/C//A         | nonsynonymous | 0 | 2 |
| SNCA    | chr4 | 90743430/G//T         | synonymous    | 0 | 2 |
| CENPE   | chr4 | 104070370/T//C        | nonsynonymous | 0 | 2 |
| ENPEP   | chr4 | 111412263/G//T        | synonymous    | 0 | 2 |
| ANK2    | chr4 | 114279022/C//A        | nonsynonymous | 0 | 2 |
| PRDM5   | chr4 | 121698358/T//C        | nonsynonymous | 0 | 2 |
| RNF150  | chr4 | 141888947/C//T        | nonsynonymous | 0 | 2 |
| C4orf45 | chr4 | 159814831/G//T        | synonymous    | 0 | 2 |
| DDX60   | chr4 | 169195105/C//A        | nonsynonymous | 0 | 2 |
| EXOC3   | chr5 | 446373/G//T           | nonsynonymous | 0 | 2 |
| SLC6A3  | chr5 | 1422073/C//T          | nonsynonymous | 0 | 2 |
| IRX4    | chr5 | 1882119/G//C          | nonsynonymous | 0 | 2 |
| CTNND2  | chr5 | 11082943/G//T         | synonymous    | 0 | 2 |
| CDH10   | chr5 | 24509698/T//A         | synonymous    | 0 | 2 |
| AGXT2   | chr5 | 34998834/C//G         | nonsynonymous | 0 | 2 |
| C7      | chr5 | 40937765/T//G         | nonsynonymous | 0 | 2 |
| MROH2B  | chr5 | 41057265/C//A         | nonsynonymous | 0 | 2 |
| FBXO4   | chr5 | 41925363/G//T         | synonymous    | 0 | 2 |
| GHR     | chr5 | 42719221/G//T         | nonsynonymous | 0 | 2 |
| NNT     | chr5 | 43624218/A//G         | nonsynonymous | 0 | 2 |
| FGF10   | chr5 | 44388542/C//A         | nonsynonymous | 0 | 2 |
| FGF10   | chr5 | 44388698/C//A         | nonsynonymous | 0 | 2 |
| MCIDAS  | chr5 | 54523034/C//A         | synonymous    | 0 | 2 |
| MAP3K1  | chr5 | 56171105/G//T         | nonsynonymous | 0 | 2 |
| MAST4   | chr5 | 66460988/G//C         | nonsynonymous | 0 | 2 |
| ADGRV1  | chr5 | 90049518/C//T         | nonsynonymous | 0 | 2 |
| KCNN2   | chr5 | 113740349/T//A        | nonsynonymous | 0 | 2 |
| KCNN2   | chr5 | 113831851/C//A        | nonsynonymous | 0 | 2 |
| PCDHA6  | chr5 | 140208457/G//T        | nonsynonymous | 0 | 2 |
| PCDHA7  | chr5 | 140215836/G//A        | nonsynonymous | 0 | 2 |
| PCDHA11 | chr5 | 140250991/T//A        | nonsynonymous | 0 | 2 |
| PCDHB10 | chr5 | 140572514/C//G        | nonsynonymous | 0 | 2 |

|          |      |                |               |   |   |
|----------|------|----------------|---------------|---|---|
| PCDHB12  | chr5 | 140588582/G//T | nonsynonymous | 0 | 2 |
| PCDHGA6  | chr5 | 140754865/G//A | synonymous    | 0 | 2 |
| ABLIM3   | chr5 | 148622082/C//A | synonymous    | 0 | 2 |
| CCDC69   | chr5 | 150563079/G//C | nonsynonymous | 0 | 2 |
| SLC36A2  | chr5 | 150704892/C//A | nonsynonymous | 0 | 2 |
| SPARC    | chr5 | 151051208/C//A | nonsynonymous | 0 | 2 |
| GRIA1    | chr5 | 153026721/G//T | nonsynonymous | 0 | 2 |
| ATP10B   | chr5 | 160047592/G//T | synonymous    | 0 | 2 |
|          | chr5 | 162930366/T//G | synonymous    | 0 | 2 |
| TENM2    | chr5 | 166712041/C//A | synonymous    | 0 | 2 |
| SLIT3    | chr5 | 168187871/T//C | nonsynonymous | 0 | 2 |
| FOXI1    | chr5 | 169532986/C//T | nonsynonymous | 0 | 2 |
| BOD1     | chr5 | 173040196/C//A | nonsynonymous | 0 | 2 |
| ZNF879   | chr5 | 178459595/A//T | nonsynonymous | 0 | 2 |
| OR2Y1    | chr5 | 180166123/C//A | nonsynonymous | 0 | 2 |
| RREB1    | chr6 | 7211139/C//T   | synonymous    | 0 | 2 |
| GCNT2    | chr6 | 10626777/G//A  | synonymous    | 0 | 2 |
| CD83     | chr6 | 14131826/G//T  | nonsynonymous | 0 | 2 |
| HIST1H3I | chr6 | 27839874/C//G  | nonsynonymous | 0 | 2 |
| GTF2H4   | chr6 | 30879860/G//T  | nonsynonymous | 0 | 2 |
| TNXB     | chr6 | 32035631/G//T  | synonymous    | 0 | 2 |
| TAP2     | chr6 | 32805705/C//A  | synonymous    | 0 | 2 |
|          | chr6 | 42903269/G//T  | synonymous    | 0 | 2 |
| TDRD6    | chr6 | 46658034/G//C  | nonsynonymous | 0 | 2 |
| HMGCLL1  | chr6 | 55304234/T//A  | nonsynonymous | 0 | 2 |
| BMP5     | chr6 | 55739636/C//A  | nonsynonymous | 0 | 2 |
| KIAA1586 | chr6 | 56917505/A//G  | nonsynonymous | 0 | 2 |
| EYS      | chr6 | 64574244/C//T  | nonsynonymous | 0 | 2 |
| TTK      | chr6 | 80732156/G//T  | nonsynonymous | 0 | 2 |
| IBTK     | chr6 | 82904329/A//A  | nonsynonymous | 0 | 2 |
| TRDN     | chr6 | 123759228/G//T | nonsynonymous | 0 | 2 |
| MED23    | chr6 | 131931258/T//C | synonymous    | 0 | 2 |
| TAAR6    | chr6 | 132891983/G//C | nonsynonymous | 0 | 2 |
| TAAR6    | chr6 | 132892191/G//T | nonsynonymous | 0 | 2 |
|          | chr6 | 154331664/C//A | synonymous    | 0 | 2 |
| OPRM1    | chr6 | 154412236/C//A | nonsynonymous | 0 | 2 |
| TIAM2    | chr6 | 155503448/G//T | synonymous    | 0 | 2 |
| IGF2R    | chr6 | 160448258/C//T | nonsynonymous | 0 | 2 |
| WDR27    | chr6 | 169857546/C//A | synonymous    | 0 | 2 |
| WIPI2    | chr7 | 5256241/G//T   | synonymous    | 0 | 2 |
| NXPH1    | chr7 | 8791355/G//T   | nonsynonymous | 0 | 2 |
| SFRP4    | chr7 | 37951805/G//T  | nonsynonymous | 0 | 2 |
| NPC1L1   | chr7 | 44574045/C//A  | nonsynonymous | 0 | 2 |
| IGFBP3   | chr7 | 45954541/G//T  | nonsynonymous | 0 | 2 |
| IKZF1    | chr7 | 50444497/G//T  | synonymous    | 0 | 2 |
| ZNF117   | chr7 | 64438479/T//A  | synonymous    | 0 | 2 |
| CACNA2D1 | chr7 | 81614020/A//T  | nonsynonymous | 0 | 2 |
| DBF4     | chr7 | 87517355/G//T  | nonsynonymous | 0 | 2 |
| ZNF804B  | chr7 | 88965173/G//T  | synonymous    | 0 | 2 |
| FZD1     | chr7 | 90895884/C//T  | synonymous    | 0 | 2 |
| CDK6     | chr7 | 92462615/C//T  | nonsynonymous | 0 | 2 |
| PEG10    | chr7 | 94293493/G//A  | nonsynonymous | 0 | 2 |
| LAMB1    | chr7 | 107593974/C//A | nonsynonymous | 0 | 2 |
| LAMB1    | chr7 | 107595983/T//A | nonsynonymous | 0 | 2 |
| PNPLA8   | chr7 | 108131890/C//T | synonymous    | 0 | 2 |
| PPP1R3A  | chr7 | 113519322/C//A | nonsynonymous | 0 | 2 |
| CFTR     | chr7 | 117149111/C//T | nonsynonymous | 0 | 2 |
| CPED1    | chr7 | 120906303/C//A | nonsynonymous | 0 | 2 |
| NDUFA5   | chr7 | 123197466/G//A | nonsynonymous | 0 | 2 |
| GCC1     | chr7 | 127224713/A//T | nonsynonymous | 0 | 2 |
| FSCN3    | chr7 | 127238495/C//A | nonsynonymous | 0 | 2 |
| MKLN1    | chr7 | 131149075/C//G | nonsynonymous | 0 | 2 |
| CALD1    | chr7 | 134618183/G//T | nonsynonymous | 0 | 2 |
| SVOPL    | chr7 | 138363762/G//C | nonsynonymous | 0 | 2 |
| ATP6V0A4 | chr7 | 138444520/C//T | nonsynonymous | 0 | 2 |
| KEL      | chr7 | 142643395/G//T | nonsynonymous | 0 | 2 |
| TAS2R41  | chr7 | 143175796/T//G | synonymous    | 0 | 2 |
| CTAGE6   | chr7 | 143453530/A//T | nonsynonymous | 0 | 2 |
| ZNF282   | chr7 | 148904487/G//T | nonsynonymous | 0 | 2 |
| ZNF777   | chr7 | 149153037/C//A | nonsynonymous | 0 | 2 |

|          |       |                 |               |   |   |
|----------|-------|-----------------|---------------|---|---|
| CRYGN    | chr7  | 151133409/G//T  | nonsynonymous | 0 | 2 |
| DLGAP2   | chr8  | 1497461/A//T    | nonsynonymous | 0 | 2 |
| PXDNL    | chr8  | 52321030/C//A   | nonsynonymous | 0 | 2 |
| SOX17    | chr8  | 55370986/C//A   | synonymous    | 0 | 2 |
| FAM110B  | chr8  | 59059611/G//T   | synonymous    | 0 | 2 |
| ZFHx4    | chr8  | 77616941/A//T   | synonymous    | 0 | 2 |
| ZFHx4    | chr8  | 77617383/A//T   | nonsynonymous | 0 | 2 |
| ZFHx4    | chr8  | 77768511/G//T   | nonsynonymous | 0 | 2 |
| RALYL    | chr8  | 85686813/G//C   | nonsynonymous | 0 | 2 |
| NECAB1   | chr8  | 91953055/G//C   | nonsynonymous | 0 | 2 |
| POP1     | chr8  | 99158853/G//T   | nonsynonymous | 0 | 2 |
|          | chr8  | 100519370/G//T  | synonymous    | 0 | 2 |
| RIMS2    | chr8  | 104897695/C//A  | nonsynonymous | 0 | 2 |
| RIMS2    | chr8  | 104940115/C//A  | nonsynonymous | 0 | 2 |
| DCSTAMP  | chr8  | 105367169/G//T  | nonsynonymous | 0 | 2 |
| DPYS     | chr8  | 105405165/G//T  | synonymous    | 0 | 2 |
| ZFPM2    | chr8  | 106814844/C//A  | nonsynonymous | 0 | 2 |
| CSMD3    | chr8  | 113301724/C//A  | synonymous    | 0 | 2 |
| CSMD3    | chr8  | 113303794/T//A  | synonymous    | 0 | 2 |
|          | chr8  | 118159081/A//G  | synonymous    | 0 | 2 |
| FAM135B  | chr8  | 139153480/G//A  | synonymous    | 0 | 2 |
| FAM135B  | chr8  | 139190820/G//T  | synonymous    | 0 | 2 |
| ARC      | chr8  | 143694490/G//T  | synonymous    | 0 | 2 |
| SPATC1   | chr8  | 145094871/C//T  | synonymous    | 0 | 2 |
| RFX3     | chr9  | 3248079/G//A    | nonsynonymous | 0 | 2 |
| EQTN     | chr9  | 27297025/G//T   | nonsynonymous | 0 | 2 |
| TOPORS   | chr9  | 32543353/T//G   | synonymous    | 0 | 2 |
| SIGMAR1  | chr9  | 34637764/C//T   | synonymous    | 0 | 2 |
| FANCG    | chr9  | 35077335/A//G   | nonsynonymous | 0 | 2 |
| CCDC180  | chr9  | 100092802/C//A  | nonsynonymous | 0 | 2 |
| ANKS6    | chr9  | 101530418/G//C  | nonsynonymous | 0 | 2 |
| GALNT12  | chr9  | 101599362/C//T  | nonsynonymous | 0 | 2 |
| COL15A1  | chr9  | 101818657/C//A  | nonsynonymous | 0 | 2 |
| GRIN3A   | chr9  | 104499681/G//GA | nonsynonymous | 0 | 2 |
| OR13C2   | chr9  | 107367884/G//C  | nonsynonymous | 0 | 2 |
| KLF4     | chr9  | 110249963/G//T  | nonsynonymous | 0 | 2 |
| FKBP15   | chr9  | 115936807/C//A  | nonsynonymous | 0 | 2 |
| RNF183   | chr9  | 116060154/G//T  | nonsynonymous | 0 | 2 |
| TRAF1    | chr9  | 123673639/GC//G | nonsynonymous | 0 | 2 |
| OR1B1    | chr9  | 125390986/C//A  | nonsynonymous | 0 | 2 |
| OR1L6    | chr9  | 125513016/A//C  | nonsynonymous | 0 | 2 |
| SCAI     | chr9  | 127765424/T//A  | nonsynonymous | 0 | 2 |
| ODF2     | chr9  | 131218481/C//T  | synonymous    | 0 | 2 |
| USP20    | chr9  | 132640649/G//T  | synonymous    | 0 | 2 |
| GPR107   | chr9  | 132816191/G//T  | synonymous    | 0 | 2 |
| SETX     | chr9  | 135221833/C//A  | nonsynonymous | 0 | 2 |
| DPP7     | chr9  | 140009143/G//A  | nonsynonymous | 0 | 2 |
| NDOR1    | chr9  | 140110544/A//T  | nonsynonymous | 0 | 2 |
| ADARB2   | chr10 | 1779252/C//A    | nonsynonymous | 0 | 2 |
| AKR1C4   | chr10 | 5254658/G//T    | nonsynonymous | 0 | 2 |
| FBXO18   | chr10 | 5960348/TG//T   | nonsynonymous | 0 | 2 |
| ITGA8    | chr10 | 15634295/C//A   | synonymous    | 0 | 2 |
| ITGA8    | chr10 | 15688860/G//T   | nonsynonymous | 0 | 2 |
| CACNB2   | chr10 | 18429770/C//A   | synonymous    | 0 | 2 |
| ARMC3    | chr10 | 23270571/C//A   | synonymous    | 0 | 2 |
| KIAA1217 | chr10 | 24508829/G//C   | synonymous    | 0 | 2 |
| FZD8     | chr10 | 35930233/A//C   | nonsynonymous | 0 | 2 |
| ANKRD30A | chr10 | 37441000/C//A   | nonsynonymous | 0 | 2 |
| RBP3     | chr10 | 48388623/G//T   | nonsynonymous | 0 | 2 |
| GDF10    | chr10 | 48429113/C//A   | nonsynonymous | 0 | 2 |
| FRMPD2   | chr10 | 49450351/C//A   | nonsynonymous | 0 | 2 |
| WDFY4    | chr10 | 50178193/G//T   | nonsynonymous | 0 | 2 |
| VSTM4    | chr10 | 50315706/C//A   | nonsynonymous | 0 | 2 |
|          | chr10 | 55566570/C//A   | synonymous    | 0 | 2 |
|          | chr10 | 55569257/C//A   | synonymous    | 0 | 2 |
| PCDH15   | chr10 | 56138617/C//T   | synonymous    | 0 | 2 |
| PCDH15   | chr10 | 56287564/T//A   | synonymous    | 0 | 2 |
| ANK3     | chr10 | 61829710/T//A   | synonymous    | 0 | 2 |
| ZNF365   | chr10 | 64159602/A//T   | synonymous    | 0 | 2 |
| PALD1    | chr10 | 72291046/G//C   | nonsynonymous | 0 | 2 |

|          |       |                |               |   |   |
|----------|-------|----------------|---------------|---|---|
| ADAMTS14 | chr10 | 72493723/G//A  | nonsynonymous | 0 | 2 |
| UNC5B    | chr10 | 73056465/G//T  | nonsynonymous | 0 | 2 |
| PSAP     | chr10 | 73581696/C//A  | synonymous    | 0 | 2 |
| NDST2    | chr10 | 75568185/C//G  | synonymous    | 0 | 2 |
| SH2D4B   | chr10 | 82348465/G//T  | nonsynonymous | 0 | 2 |
| DNTT     | chr10 | 98079048/C//A  | nonsynonymous | 0 | 2 |
| FGF8     | chr10 | 103534923/G//A | synonymous    | 0 | 2 |
| LDB1     | chr10 | 103871191/C//A | nonsynonymous | 0 | 2 |
| CFAP58   | chr10 | 106128266/T//C | nonsynonymous | 0 | 2 |
| ADD3     | chr10 | 111892126/A//T | nonsynonymous | 0 | 2 |
| KCNK18   | chr10 | 118969488/G//T | nonsynonymous | 0 | 2 |
| PDZD8    | chr10 | 119044080/T//C | nonsynonymous | 0 | 2 |
| CPXM2    | chr10 | 125506476/T//A | nonsynonymous | 0 | 2 |
| ADAM8    | chr10 | 135082998/C//T | synonymous    | 0 | 2 |
| TUBGCP2  | chr10 | 135106161/C//G | synonymous    | 0 | 2 |
| OR51Q1   | chr11 | 5443416/A//C   | synonymous    | 0 | 2 |
| OR52N1   | chr11 | 5810018/G//T   | nonsynonymous | 0 | 2 |
| FAM160A2 | chr11 | 6245755/C//A   | synonymous    | 0 | 2 |
| OR2AG1   | chr11 | 6806580/A//G   | synonymous    | 0 | 2 |
| OR10A2   | chr11 | 6891858/G//A   | synonymous    | 0 | 2 |
| INSC     | chr11 | 15267544/C//A  | nonsynonymous | 0 | 2 |
| SLC5A12  | chr11 | 26725449/C//A  | nonsynonymous | 0 | 2 |
| FSHB     | chr11 | 30255312/C//A  | nonsynonymous | 0 | 2 |
| DCDC5    | chr11 | 30914433/C//A  | nonsynonymous | 0 | 2 |
| C11orf91 | chr11 | 33720062/T//C  | nonsynonymous | 0 | 2 |
| CAT      | chr11 | 34475412/C//G  | nonsynonymous | 0 | 2 |
| API5     | chr11 | 43333621/C//T  | synonymous    | 0 | 2 |
| PEX16    | chr11 | 45932473/C//A  | nonsynonymous | 0 | 2 |
| CKAP5    | chr11 | 46772100/C//A  | nonsynonymous | 0 | 2 |
| LRP4     | chr11 | 46907690/C//A  | nonsynonymous | 0 | 2 |
| TRIM48   | chr11 | 55032767/G//T  | nonsynonymous | 0 | 2 |
| OR4A16   | chr11 | 55110769/C//A  | synonymous    | 0 | 2 |
| OR5D18   | chr11 | 55587111/G//T  | synonymous    | 0 | 2 |
| OR5D18   | chr11 | 55587840/C//T  | synonymous    | 0 | 2 |
| OR8H2    | chr11 | 55873044/C//A  | nonsynonymous | 0 | 2 |
| OR8J3    | chr11 | 55904280/C//A  | nonsynonymous | 0 | 2 |
| OR8H1    | chr11 | 56058116/G//A  | synonymous    | 0 | 2 |
| OR5M11   | chr11 | 56310718/C//A  | nonsynonymous | 0 | 2 |
| APLNR    | chr11 | 57003765/C//G  | nonsynonymous | 0 | 2 |
| OR9Q2    | chr11 | 57958836/C//A  | nonsynonymous | 0 | 2 |
| MS4A12   | chr11 | 60264955/C//G  | nonsynonymous | 0 | 2 |
| CCDC86   | chr11 | 60617675/C//T  | synonymous    | 0 | 2 |
| AHNAK    | chr11 | 62297270/C//A  | nonsynonymous | 0 | 2 |
| SLC22A10 | chr11 | 63072289/G//C  | nonsynonymous | 0 | 2 |
| LTBP3    | chr11 | 65321327/C//T  | nonsynonymous | 0 | 2 |
| TSGA10IP | chr11 | 65713257/G//T  | synonymous    | 0 | 2 |
| TSGA10IP | chr11 | 65715305/C//T  | synonymous    | 0 | 2 |
| ZDHHC24  | chr11 | 66311292/C//G  | nonsynonymous | 0 | 2 |
| LRP5     | chr11 | 68177608/G//T  | nonsynonymous | 0 | 2 |
| IGHMBP2  | chr11 | 68671331/C//T  | synonymous    | 0 | 2 |
| SHANK2   | chr11 | 70332580/A//T  | nonsynonymous | 0 | 2 |
| NEU3     | chr11 | 74717570/T//C  | synonymous    | 0 | 2 |
| DLG2     | chr11 | 83180305/C//A  | nonsynonymous | 0 | 2 |
| NAALAD2  | chr11 | 89867893/T//C  | synonymous    | 0 | 2 |
| FAT3     | chr11 | 92577145/C//A  | nonsynonymous | 0 | 2 |
| NCAM1    | chr11 | 113075227/G//T | nonsynonymous | 0 | 2 |
| APOC3    | chr11 | 116701532/G//T | nonsynonymous | 0 | 2 |
| DSCAML1  | chr11 | 117301550/C//T | nonsynonymous | 0 | 2 |
| OR6T1    | chr11 | 123813724/G//T | synonymous    | 0 | 2 |
| OR10G8   | chr11 | 123901084/G//T | nonsynonymous | 0 | 2 |
| ROBO4    | chr11 | 124763758/G//T | nonsynonymous | 0 | 2 |
| B3GAT1   | chr11 | 134253842/A//T | nonsynonymous | 0 | 2 |
| DYRK4    | chr12 | 4705775/T//A   | nonsynonymous | 0 | 2 |
| NOP2     | chr12 | 6666224/G//A   | nonsynonymous | 0 | 2 |
| ATN1     | chr12 | 7046673/C//T   | nonsynonymous | 0 | 2 |
| C1S      | chr12 | 7177277/G//T   | synonymous    | 0 | 2 |
| CD163    | chr12 | 7649684/C//A   | nonsynonymous | 0 | 2 |
| PZP      | chr12 | 9310394/A//G   | nonsynonymous | 0 | 2 |
| PTPRO    | chr12 | 15661660/C//A  | nonsynonymous | 0 | 2 |
| RERGL    | chr12 | 18234243/C//G  | nonsynonymous | 0 | 2 |

|           |       |                |               |   |   |
|-----------|-------|----------------|---------------|---|---|
| SOX5      | chr12 | 23999038/A/G   | synonymous    | 0 | 2 |
| KRAS      | chr12 | 25398284/C/G   | nonsynonymous | 0 | 2 |
| SMCO2     | chr12 | 27648646/A/T   | nonsynonymous | 0 | 2 |
| FAR2      | chr12 | 29423542/C//A  | nonsynonymous | 0 | 2 |
| OVCH1-AS1 | chr12 | 29614763/T//A  | synonymous    | 0 | 2 |
| DDX11     | chr12 | 31249932/G//T  | synonymous    | 0 | 2 |
| H3F3C     | chr12 | 31944562/C//A  | synonymous    | 0 | 2 |
| PDZRN4    | chr12 | 41946460/G//T  | nonsynonymous | 0 | 2 |
| KANSL2    | chr12 | 49054239/C//A  | synonymous    | 0 | 2 |
| KMT2D     | chr12 | 49427980/T//A  | nonsynonymous | 0 | 2 |
| KMT2D     | chr12 | 49427983/C//G  | nonsynonymous | 0 | 2 |
| PRPH      | chr12 | 49689154/G//A  | synonymous    | 0 | 2 |
| KRT4      | chr12 | 53202199/T//C  | nonsynonymous | 0 | 2 |
| RDH5      | chr12 | 56117734/G//A  | nonsynonymous | 0 | 2 |
| PAN2      | chr12 | 56720416/G//C  | nonsynonymous | 0 | 2 |
| MYO1A     | chr12 | 57435079/G//T  | synonymous    | 0 | 2 |
| MBD6      | chr12 | 57920471/G//C  | nonsynonymous | 0 | 2 |
| AVIL      | chr12 | 58197140/G//A  | nonsynonymous | 0 | 2 |
| LGR5      | chr12 | 71834080/C//G  | synonymous    | 0 | 2 |
| PTPRQ     | chr12 | 81028730/A//T  | synonymous    | 0 | 2 |
| MYF6      | chr12 | 81102701/C//A  | nonsynonymous | 0 | 2 |
| EPYC      | chr12 | 91365624/T//A  | nonsynonymous | 0 | 2 |
| NTN4      | chr12 | 96104404/C//A  | nonsynonymous | 0 | 2 |
| CCDC38    | chr12 | 96300201/T//C  | synonymous    | 0 | 2 |
| ASCL4     | chr12 | 108169074/C//A | nonsynonymous | 0 | 2 |
| HECTD4    | chr12 | 112622917/C//A | nonsynonymous | 0 | 2 |
| PRKAB1    | chr12 | 120118099/A//T | nonsynonymous | 0 | 2 |
| TMEM132C  | chr12 | 129180502/C//T | nonsynonymous | 0 | 2 |
| TMEM132C  | chr12 | 129190373/C//G | nonsynonymous | 0 | 2 |
| GALNT9    | chr12 | 132685807/C//G | nonsynonymous | 0 | 2 |
| PXMP2     | chr12 | 133272600/A//T | nonsynonymous | 0 | 2 |
| USPL1     | chr13 | 31232649/C//G  | nonsynonymous | 0 | 2 |
| MAB21L1   | chr13 | 36049869/A//T  | nonsynonymous | 0 | 2 |
| SMAD9     | chr13 | 37453486/T//C  | nonsynonymous | 0 | 2 |
| FREM2     | chr13 | 39435703/G//A  | synonymous    | 0 | 2 |
| PCDH8     | chr13 | 53420228/G//A  | nonsynonymous | 0 | 2 |
| PCDH20    | chr13 | 61989265/G//C  | nonsynonymous | 0 | 2 |
| TBC1D4    | chr13 | 75866402/T//C  | nonsynonymous | 0 | 2 |
| SLITRK5   | chr13 | 88329816/G//T  | nonsynonymous | 0 | 2 |
| NALCN     | chr13 | 101763564/G//T | nonsynonymous | 0 | 2 |
| OR4M1     | chr14 | 20248525/C//A  | nonsynonymous | 0 | 2 |
| OR11H6    | chr14 | 20692358/T//A  | nonsynonymous | 0 | 2 |
| RNASE13   | chr14 | 21502366/C//T  | nonsynonymous | 0 | 2 |
| LRFN5     | chr14 | 42356105/C//A  | nonsynonymous | 0 | 2 |
| LRFN5     | chr14 | 42356586/G//T  | nonsynonymous | 0 | 2 |
| FSCB      | chr14 | 44975685/C//T  | nonsynonymous | 0 | 2 |
| FAM179B   | chr14 | 45431933/C//T  | synonymous    | 0 | 2 |
| RPL10L    | chr14 | 47120593/C//A  | nonsynonymous | 0 | 2 |
| C14orf105 | chr14 | 57938199/C//A  | nonsynonymous | 0 | 2 |
| JDP2      | chr14 | 75904753/G//T  | nonsynonymous | 0 | 2 |
| TTLL5     | chr14 | 76129455/G//T  | synonymous    | 0 | 2 |
| NRXN3     | chr14 | 79175805/A//G  | synonymous    | 0 | 2 |
| CEP128    | chr14 | 81372391/A//G  | nonsynonymous | 0 | 2 |
| BCL11B    | chr14 | 99641428/C//T  | nonsynonymous | 0 | 2 |
| KIF26A    | chr14 | 104618695/G//A | nonsynonymous | 0 | 2 |
| RYR3      | chr15 | 33988429/G//T  | nonsynonymous | 0 | 2 |
| GJD2      | chr15 | 35046676/G//T  | nonsynonymous | 0 | 2 |
| DUOXA2    | chr15 | 45406664/C//G  | synonymous    | 0 | 2 |
| PLEKHO2   | chr15 | 65157332/G//T  | nonsynonymous | 0 | 2 |
| SCAPER    | chr15 | 77067357/T//C  | nonsynonymous | 0 | 2 |
| NTRK3     | chr15 | 88679227/C//T  | synonymous    | 0 | 2 |
| VPS33B    | chr15 | 91550237/C//A  | nonsynonymous | 0 | 2 |
| SV2B      | chr15 | 91809855/A//T  | nonsynonymous | 0 | 2 |
| ADAMTS17  | chr15 | 100636585/C//T | nonsynonymous | 0 | 2 |
| PDILT     | chr16 | 20380957/A//T  | nonsynonymous | 0 | 2 |
| ACSM2B    | chr16 | 20552055/G//T  | nonsynonymous | 0 | 2 |
| ATXN2L    | chr16 | 28847619/G//T  | synonymous    | 0 | 2 |
| QPRT      | chr16 | 29708560/C//T  | nonsynonymous | 0 | 2 |
| HEATR3    | chr16 | 50128648/A//G  | nonsynonymous | 0 | 2 |
| NUP93     | chr16 | 56839516/A//T  | nonsynonymous | 0 | 2 |

|          |       |                 |               |   |   |
|----------|-------|-----------------|---------------|---|---|
| NLRC5    | chr16 | 57073765/G//T   | synonymous    | 0 | 2 |
| CDH8     | chr16 | 61935328/G//A   | nonsynonymous | 0 | 2 |
| CHST5    | chr16 | 75563836/G//A   | synonymous    | 0 | 2 |
| PKD1L2   | chr16 | 81155247/C//A   | nonsynonymous | 0 | 2 |
| GSE1     | chr16 | 85667744/G//C   | synonymous    | 0 | 2 |
| CPNE7    | chr16 | 89642448/T//C   | nonsynonymous | 0 | 2 |
| ZNF276   | chr16 | 89805514/G//C   | synonymous    | 0 | 2 |
| NCBP3    | chr17 | 3716423/T//G    | nonsynonymous | 0 | 2 |
| FAM64A   | chr17 | 6352718/C//A    | nonsynonymous | 0 | 2 |
| PHF23    | chr17 | 7139283/C//A    | nonsynonymous | 0 | 2 |
| MYH2     | chr17 | 10448808/A//G   | synonymous    | 0 | 2 |
| KIAA0100 | chr17 | 26951342/G//C   | nonsynonymous | 0 | 2 |
| TBC1D29  | chr17 | 28890256/A//T   | nonsynonymous | 0 | 2 |
| CSF3     | chr17 | 38171999/C//G   | synonymous    | 0 | 2 |
| TMEM99   | chr17 | 38990868/A//G   | nonsynonymous | 0 | 2 |
| DBF4B    | chr17 | 42827984/G//T   | nonsynonymous | 0 | 2 |
| PLEKHM1  | chr17 | 43517549/T//A   | nonsynonymous | 0 | 2 |
| SNX11    | chr17 | 46196368/G//A   | nonsynonymous | 0 | 2 |
| CACNA1G  | chr17 | 48685333/G//A   | nonsynonymous | 0 | 2 |
| SPAG9    | chr17 | 49073994/C//G   | nonsynonymous | 0 | 2 |
| SCN4A    | chr17 | 62018923/G//A   | synonymous    | 0 | 2 |
| TEX2     | chr17 | 62290017/C//A   | nonsynonymous | 0 | 2 |
| TEX2     | chr17 | 62290449/T//A   | nonsynonymous | 0 | 2 |
| ARSG     | chr17 | 66339925/G//T   | synonymous    | 0 | 2 |
| ABCA9    | chr17 | 67031905/T//A   | nonsynonymous | 0 | 2 |
| KIF19    | chr17 | 72349725/G//A   | synonymous    | 0 | 2 |
| CASKIN2  | chr17 | 73509865/C//G   | synonymous    | 0 | 2 |
| ITGB4    | chr17 | 73749980/G//A   | nonsynonymous | 0 | 2 |
| AFMID    | chr17 | 76202015/TCC//T | synonymous    | 0 | 2 |
| CEP295NL | chr17 | 76887851/G//A   | synonymous    | 0 | 2 |
| MTCL1    | chr18 | 8783739/G//T    | nonsynonymous | 0 | 2 |
| ROCK1    | chr18 | 18629847/T//C   | synonymous    | 0 | 2 |
| ATP5A1   | chr18 | 43671693/C//A   | nonsynonymous | 0 | 2 |
| LIPG     | chr18 | 47095862/C//A   | nonsynonymous | 0 | 2 |
| ALPK2    | chr18 | 56204754/G//T   | nonsynonymous | 0 | 2 |
| ZADH2    | chr18 | 72913384/T//C   | nonsynonymous | 0 | 2 |
| C2CD4C   | chr19 | 407837/C//T     | synonymous    | 0 | 2 |
| NMRK2    | chr19 | 3936644/A//C    | nonsynonymous | 0 | 2 |
| EVI5L    | chr19 | 7927313/G//C    | nonsynonymous | 0 | 2 |
| MUC16    | chr19 | 8993550/G//A    | synonymous    | 0 | 2 |
| PPAN     | chr19 | 10216927/T//C   | synonymous    | 0 | 2 |
| ZNF564   | chr19 | 12638579/G//A   | nonsynonymous | 0 | 2 |
| ZNF564   | chr19 | 12638670/G//A   | synonymous    | 0 | 2 |
| CPAMD8   | chr19 | 17111307/C//A   | nonsynonymous | 0 | 2 |
| SUGP2    | chr19 | 19115058/G//A   | nonsynonymous | 0 | 2 |
| ZNF729   | chr19 | 22499007/C//G   | nonsynonymous | 0 | 2 |
| ZNF254   | chr19 | 24309549/A//G   | synonymous    | 0 | 2 |
| ZNF536   | chr19 | 30935088/A//T   | nonsynonymous | 0 | 2 |
| TSHZ3    | chr19 | 31770505/G//T   | nonsynonymous | 0 | 2 |
| CHST8    | chr19 | 34262897/G//T   | nonsynonymous | 0 | 2 |
| ACP7     | chr19 | 39589258/C//A   | nonsynonymous | 0 | 2 |
| ACP7     | chr19 | 39589260/G//A   | nonsynonymous | 0 | 2 |
| FCGBP    | chr19 | 40411831/C//T   | nonsynonymous | 0 | 2 |
| FCGBP    | chr19 | 40421397/G//A   | nonsynonymous | 0 | 2 |
| ERICH4   | chr19 | 41949215/C//G   | synonymous    | 0 | 2 |
| CIC      | chr19 | 42794881/C//T   | nonsynonymous | 0 | 2 |
| PSG9     | chr19 | 43763006/C//A   | synonymous    | 0 | 2 |
| PSG9     | chr19 | 43773581/C//A   | nonsynonymous | 0 | 2 |
| IRGC     | chr19 | 44223086/C//G   | nonsynonymous | 0 | 2 |
| ZNF180   | chr19 | 45004268/G//A   | nonsynonymous | 0 | 2 |
| CCDC61   | chr19 | 46521582/C//T   | synonymous    | 0 | 2 |
| PNMAL1   | chr19 | 46973425/C//A   | nonsynonymous | 0 | 2 |
| ELSPBP1  | chr19 | 48523018/C//T   | nonsynonymous | 0 | 2 |
| DKKL1    | chr19 | 49878082/C//A   | synonymous    | 0 | 2 |
| POLD1    | chr19 | 50918719/C//A   | nonsynonymous | 0 | 2 |
|          | chr19 | 51890430/G//T   | synonymous    | 0 | 2 |
| SIGLEC8  | chr19 | 51961708/T//A   | synonymous    | 0 | 2 |
| ZNF836   | chr19 | 52663827/C//G   | nonsynonymous | 0 | 2 |
| ZNF534   | chr19 | 52942089/T//C   | nonsynonymous | 0 | 2 |
| ZNF578   | chr19 | 53005138/G//T   | nonsynonymous | 0 | 2 |



|           |       |                  |               |   |   |
|-----------|-------|------------------|---------------|---|---|
| CACNG6    | chr19 | 54496179/G//A    | synonymous    | 0 | 2 |
| LILRA2    | chr19 | 55086011/C//A    | nonsynonymous | 0 | 2 |
| KIR2DL3   | chr19 | 55253721/C//A    | synonymous    | 0 | 2 |
| KIR2DL3   | chr19 | 55255397/C//A    | synonymous    | 0 | 2 |
| KIR2DL4   | chr19 | 55325198/G//A    | nonsynonymous | 0 | 2 |
| NLRP7     | chr19 | 55450452/G//C    | nonsynonymous | 0 | 2 |
| NLRP7     | chr19 | 55452869/T//G    | nonsynonymous | 0 | 2 |
| SYT5      | chr19 | 55687383/T//C    | nonsynonymous | 0 | 2 |
| FAM71E2   | chr19 | 55871277/G//C    | nonsynonymous | 0 | 2 |
| ZNF134    | chr19 | 58132761/G//T    | nonsynonymous | 0 | 2 |
| A1BG      | chr19 | 58863053/G//T    | nonsynonymous | 0 | 2 |
| A1BG      | chr19 | 58863863/C//T    | synonymous    | 0 | 2 |
| ZNF497    | chr19 | 58868292/C//A    | nonsynonymous | 0 | 2 |
| NOP56     | chr20 | 2634013/TG//T    | nonsynonymous | 0 | 2 |
| RASSF2    | chr20 | 4764908/G//A     | synonymous    | 0 | 2 |
| SLC23A2   | chr20 | 4883165/C//T     | nonsynonymous | 0 | 2 |
| PLCB4     | chr20 | 9353023/C//A     | nonsynonymous | 0 | 2 |
| PLCB4     | chr20 | 9453496/T//A     | nonsynonymous | 0 | 2 |
| PAX1      | chr20 | 21689870/C//A    | nonsynonymous | 0 | 2 |
| THBD      | chr20 | 23028401/G//A    | synonymous    | 0 | 2 |
| DNMT3B    | chr20 | 31386297/G//T    | nonsynonymous | 0 | 2 |
| BPIFB1    | chr20 | 31876555/C//A    | nonsynonymous | 0 | 2 |
| C20orf173 | chr20 | 34116899/A//T    | nonsynonymous | 0 | 2 |
| PTPRT     | chr20 | 40747057/C//A    | nonsynonymous | 0 | 2 |
| TP53TG5   | chr20 | 44006822/G//T    | synonymous    | 0 | 2 |
| PTPN1     | chr20 | 49196310/C//T    | nonsynonymous | 0 | 2 |
| MOCS3     | chr20 | 49576379/G//T    | nonsynonymous | 0 | 2 |
| ZFP64     | chr20 | 50769190/G//A    | nonsynonymous | 0 | 2 |
| CASS4     | chr20 | 55027341/A//T    | nonsynonymous | 0 | 2 |
| RTFDC1    | chr20 | 55048380/G//T    | synonymous    | 0 | 2 |
| FAM209B   | chr20 | 55108517/G//T    | nonsynonymous | 0 | 2 |
| KCNQ2     | chr20 | 62076612/G//T    | synonymous    | 0 | 2 |
| HELZ2     | chr20 | 62199859/C//A    | nonsynonymous | 0 | 2 |
| GABPA     | chr21 | 27124544/T//C    | synonymous    | 0 | 2 |
| LTN1      | chr21 | 30307431/C//A    | synonymous    | 0 | 2 |
| MAP3K7CL  | chr21 | 30547127/C//A    | synonymous    | 0 | 2 |
| KRTAP15-1 | chr21 | 31812887/C//A    | nonsynonymous | 0 | 2 |
| KRTAP15-1 | chr21 | 31812982/C//A    | nonsynonymous | 0 | 2 |
| KRTAP19-1 | chr21 | 31852401/G//A    | nonsynonymous | 0 | 2 |
| TIAM1     | chr21 | 32502637/C//A    | synonymous    | 0 | 2 |
| TIAM1     | chr21 | 32585723/T//A    | synonymous    | 0 | 2 |
| DOPEY2    | chr21 | 37618530/CTCT//C | nonsynonymous | 0 | 2 |
| TMPRSS3   | chr21 | 43804100/C//A    | nonsynonymous | 0 | 2 |
| RRP1B     | chr21 | 45107994/T//C    | nonsynonymous | 0 | 2 |
| PCNT      | chr21 | 47831371/C//G    | nonsynonymous | 0 | 2 |
| DIP2A     | chr21 | 47953566/G//T    | synonymous    | 0 | 2 |
| MICAL3    | chr22 | 18368739/C//G    | nonsynonymous | 0 | 2 |
| SLC7A4    | chr22 | 21385934/G//T    | nonsynonymous | 0 | 2 |
| CCDC116   | chr22 | 21990806/G//A    | nonsynonymous | 0 | 2 |
| CYTH4     | chr22 | 37699294/G//A    | nonsynonymous | 0 | 2 |
| SHANK3    | chr22 | 51160006/G//A    | nonsynonymous | 0 | 2 |
| MXRA5     | chrX  | 3248742/G//T     | nonsynonymous | 0 | 2 |
| SMS       | chrX  | 22003344/A//C    | synonymous    | 0 | 2 |
| ARX       | chrX  | 25033871/C//A    | synonymous    | 0 | 2 |
| NR0B1     | chrX  | 30326574/G//T    | nonsynonymous | 0 | 2 |
| CITED1    | chrX  | 71521690/C//A    | nonsynonymous | 0 | 2 |
| GPR174    | chrX  | 78426828/C//G    | nonsynonymous | 0 | 2 |
| CENPI     | chrX  | 100364979/G//T   | nonsynonymous | 0 | 2 |
| TAF7L     | chrX  | 100537432/A//C   | nonsynonymous | 0 | 2 |
| COL4A5    | chrX  | 107930803/T//C   | synonymous    | 0 | 2 |
| ALG13     | chrX  | 110925450/C//T   | synonymous    | 0 | 2 |
| ALG13     | chrX  | 110964908/A//T   | synonymous    | 0 | 2 |
| ALG13     | chrX  | 111003103/C//G   | nonsynonymous | 0 | 2 |
| ZCCHC16   | chrX  | 111698456/A//T   | nonsynonymous | 0 | 2 |
| LHFPL1    | chrX  | 111874594/C//A   | synonymous    | 0 | 2 |
| WDR44     | chrX  | 117526989/C//T   | nonsynonymous | 0 | 2 |
| C1GALT1C1 | chrX  | 119760853/C//G   | nonsynonymous | 0 | 2 |
| DCAF12L1  | chrX  | 125685755/C//A   | synonymous    | 0 | 2 |
| SMARCA1   | chrX  | 128582421/C//A   | nonsynonymous | 0 | 2 |
| XPNPEP2   | chrX  | 128886152/G//T   | nonsynonymous | 0 | 2 |

|          |       |                  |               |   |   |
|----------|-------|------------------|---------------|---|---|
| ELF4     | chrX  | 129208592/G//C   | nonsynonymous | 0 | 2 |
| IGSF1    | chrX  | 130411024/G//C   | nonsynonymous | 0 | 2 |
| SPANXN4  | chrX  | 142121903/G//T   | nonsynonymous | 0 | 2 |
| SLITRK2  | chrX  | 144906192/G//T   | nonsynonymous | 0 | 2 |
| AFF2     | chrX  | 147967499/C//A   | nonsynonymous | 0 | 2 |
| MAGEA4   | chrX  | 151093074/A//T   | nonsynonymous | 0 | 2 |
| GABRA3   | chrX  | 151376513/C//G   | nonsynonymous | 0 | 2 |
| GABRQ    | chrX  | 151818903/G//T   | nonsynonymous | 0 | 2 |
| BGN      | chrX  | 152771986/G//C   | nonsynonymous | 0 | 2 |
| ARHGEF19 | chr1  | 16535181/C//T    | synonymous    | 0 | 2 |
| ARID1A   | chr1  | 27097790/C//T    | nonsynonymous | 0 | 2 |
| DMRTA2   | chr1  | 50884545/G//A    | nonsynonymous | 0 | 2 |
| ZNHIT6   | chr1  | 86171813/G//A    | nonsynonymous | 0 | 2 |
| CHI3L2   | chr1  | 111773482/C//T   | synonymous    | 0 | 2 |
| SPTA1    | chr1  | 158641928/C//T   | nonsynonymous | 0 | 2 |
| FCRLA    | chr1  | 161681736/C//T   | nonsynonymous | 0 | 2 |
| SEC16B   | chr1  | 177934261/G//A   | nonsynonymous | 0 | 2 |
| CR1      | chr1  | 207791470/C//T   | nonsynonymous | 0 | 2 |
| MARK1    | chr1  | 220826579/G//A   | nonsynonymous | 0 | 2 |
| TRIM17   | chr1  | 228596425/G//A   | nonsynonymous | 0 | 2 |
| FMN2     | chr1  | 240497520/G//T   | nonsynonymous | 0 | 2 |
| OR2W3    | chr1  | 248058988/G//A   | nonsynonymous | 0 | 2 |
| ZAP70    | chr2  | 98351723/G//A    | nonsynonymous | 0 | 2 |
| LCT      | chr2  | 136566554/C//T   | synonymous    | 0 | 2 |
| C3orf20  | chr3  | 14768435/G//A    | nonsynonymous | 0 | 2 |
| SRPRB    | chr3  | 133538480/G//A   | nonsynonymous | 0 | 2 |
| FGF12    | chr3  | 191861766/G//A   | synonymous    | 0 | 2 |
| CRMP1    | chr4  | 5851121/G//A     | nonsynonymous | 0 | 2 |
| NWD2     | chr4  | 37445533/T//C    | synonymous    | 0 | 2 |
| LIMCH1   | chr4  | 41664882/G//A    | nonsynonymous | 0 | 2 |
| ADGRL3   | chr4  | 62761553/G//T    | nonsynonymous | 0 | 2 |
| FAT4     | chr4  | 126411115/G//A   | nonsynonymous | 0 | 2 |
| DCHS2    | chr4  | 155219573/T//C   | nonsynonymous | 0 | 2 |
| LIFR     | chr5  | 38482253/G//C    | nonsynonymous | 0 | 2 |
| MAP1B    | chr5  | 71495815/G//A    | synonymous    | 0 | 2 |
| APC      | chr5  | 112175273/C//T   | nonsynonymous | 0 | 2 |
| PCDHA1   | chr5  | 140167228/C//T   | synonymous    | 0 | 2 |
| C1QTNF2  | chr5  | 159776163/G//A   | synonymous    | 0 | 2 |
| AARS2    | chr6  | 44274757/C//T    | nonsynonymous | 0 | 2 |
| RMND1    | chr6  | 151766445/C//T   | nonsynonymous | 0 | 2 |
| SYNE1    | chr6  | 152469350/C//T   | nonsynonymous | 0 | 2 |
| FOXK1    | chr7  | 4802185/G//C     | synonymous    | 0 | 2 |
| CSMD1    | chr8  | 3047526/G//A     | nonsynonymous | 0 | 2 |
| MTMR7    | chr8  | 17218683/C//T    | synonymous    | 0 | 2 |
| LOXL2    | chr8  | 23185989/G//A    | synonymous    | 0 | 2 |
| DPYSL2   | chr8  | 26501103/G//T    | nonsynonymous | 0 | 2 |
| MRPS28   | chr8  | 80831229/GTTC//G | nonsynonymous | 0 | 2 |
| CNBD1    | chr8  | 88298809/C//T    | nonsynonymous | 0 | 2 |
| TG       | chr8  | 133899412/A//T   | nonsynonymous | 0 | 2 |
| ADGRB1   | chr8  | 143545763/C//T   | synonymous    | 0 | 2 |
| APBA1    | chr9  | 72131497/G//A    | synonymous    | 0 | 2 |
| NAA35    | chr9  | 88591601/G//A    | nonsynonymous | 0 | 2 |
| BRINP1   | chr9  | 122000972/C//T   | nonsynonymous | 0 | 2 |
|          | chr9  | 139757345/G//A   | synonymous    | 0 | 2 |
| ABCA2    | chr9  | 139903022/G//A   | nonsynonymous | 0 | 2 |
| ADARB2   | chr10 | 1405391/C//T     | synonymous    | 0 | 2 |
| PITRM1   | chr10 | 3214939/C//A     | nonsynonymous | 0 | 2 |
| CXCL12   | chr10 | 44868765/G//A    | synonymous    | 0 | 2 |
| CNNM1    | chr10 | 101089496/G//A   | nonsynonymous | 0 | 2 |
| ADAM8    | chr10 | 135086353/G//T   | nonsynonymous | 0 | 2 |
| E2F8     | chr11 | 19258962/C//T    | nonsynonymous | 0 | 2 |
| LGR4     | chr11 | 27406830/G//T    | nonsynonymous | 0 | 2 |
| LRRC55   | chr11 | 56949887/G//A    | nonsynonymous | 0 | 2 |
| NRXN2    | chr11 | 64374714/G//A    | nonsynonymous | 0 | 2 |
| MEN1     | chr11 | 64577568/G//A    | nonsynonymous | 0 | 2 |
| NUMA1    | chr11 | 71719756/C//T    | nonsynonymous | 0 | 2 |
| ELMOD1   | chr11 | 107521111/C//A   | nonsynonymous | 0 | 2 |
| CRACR2A  | chr12 | 3757653/C//T     | synonymous    | 0 | 2 |
| GCN1     | chr12 | 120575762/G//A   | synonymous    | 0 | 2 |
| SUPT20H  | chr13 | 37614754/CAGG//C | nonsynonymous | 0 | 2 |

|          |       |                            |               |   |   |
|----------|-------|----------------------------|---------------|---|---|
| ZC3H13   | chr13 | 46539502/C//T              | nonsynonymous | 0 | 2 |
| HEATR5A  | chr14 | 31828141/G//A              | nonsynonymous | 0 | 2 |
| SNX22    | chr15 | 64445847/T//C              | synonymous    | 0 | 2 |
| CREBBP   | chr16 | 3843598/T//C               | synonymous    | 0 | 2 |
| BRD7     | chr16 | 50357588/C//T              | synonymous    | 0 | 2 |
| SALL1    | chr16 | 51175647/G//A              | synonymous    | 0 | 2 |
| CLEC3A   | chr16 | 78064478/A//G              | nonsynonymous | 0 | 2 |
| GGT6     | chr17 | 4461592/G//C               | nonsynonymous | 0 | 2 |
| BCL6B    | chr17 | 6929887/G//A               | nonsynonymous | 0 | 2 |
| CTC1     | chr17 | 8133649/G//A               | nonsynonymous | 0 | 2 |
| GPRC5C   | chr17 | 72443319/G//T              | synonymous    | 0 | 2 |
| TMEM200C | chr18 | 5891793/C//T               | synonymous    | 0 | 2 |
| SMAD2    | chr18 | 45374935/G//A              | nonsynonymous | 0 | 2 |
| MKNK2    | chr19 | 2042842/C//T               | nonsynonymous | 0 | 2 |
| OR7G2    | chr19 | 9213395/C//T               | synonymous    | 0 | 2 |
| SLC4A11  | chr20 | 3209334/T//C               | nonsynonymous | 0 | 2 |
| CENPB    | chr20 | 3765987/C//T               | nonsynonymous | 0 | 2 |
| JAG1     | chr20 | 10620460/C//T              | nonsynonymous | 0 | 2 |
| PLAGL2   | chr20 | 30789847/C//T              | synonymous    | 0 | 2 |
|          | chr20 | 50701266/C//T              | synonymous    | 0 | 2 |
| ATP5J    | chr21 | 27097661/C//A              | nonsynonymous | 0 | 2 |
| MYO18B   | chr22 | 26422905/G//A              | nonsynonymous | 0 | 2 |
| SEZ6L    | chr22 | 26706747/C//T              | synonymous    | 0 | 2 |
| CSF2RB   | chr22 | 37322096/C//T              | nonsynonymous | 0 | 2 |
| RIBC2    | chr22 | 45818219/C//T              | synonymous    | 0 | 2 |
| ZRSR2    | chrX  | 15841226/G//A              | nonsynonymous | 0 | 2 |
| KDM5C    | chrX  | 53222475/G//A              | nonsynonymous | 0 | 2 |
| PASD1    | chrX  | 150791486/C//A             | synonymous    | 0 | 2 |
| SIGLEC10 | chr19 | 51920196/G//T              | nonsynonymous | 1 | 1 |
| ACAP3    | chr1  | 1235203/G//A               | synonymous    | 0 | 2 |
| PRDM16   | chr1  | 3329104/C//T               | synonymous    | 0 | 2 |
| DCLRE1B  | chr1  | 114449646/A//G             | nonsynonymous | 0 | 2 |
| SV2A     | chr1  | 149882190/C//T             | nonsynonymous | 0 | 2 |
| ASTN1    | chr1  | 177001649/G//A             | nonsynonymous | 0 | 2 |
| GREB1    | chr2  | 11702707/C//T              | synonymous    | 0 | 2 |
|          | chr2  | 50282102/G//A              | synonymous    | 0 | 2 |
| NEB      | chr2  | 152584315/A//ATGCTGGCTGTGC | nonsynonymous | 0 | 2 |
| SGPP2    | chr2  | 223423168/G//A             | nonsynonymous | 0 | 2 |
| DZIP3    | chr3  | 108380816/T//C             | synonymous    | 0 | 2 |
| COL6A5   | chr3  | 130110250/G//A             | nonsynonymous | 0 | 2 |
| PIK3R4   | chr3  | 130463786/T//C             | nonsynonymous | 0 | 2 |
| MME      | chr3  | 154861260/C//A             | nonsynonymous | 0 | 2 |
| VWA5B2   | chr3  | 183956545/G//A             | nonsynonymous | 0 | 2 |
| DGKQ     | chr4  | 954474/C//T                | synonymous    | 0 | 2 |
| PPP2R2C  | chr4  | 6331065/G//A               | nonsynonymous | 0 | 2 |
| ETNPPL   | chr4  | 109670527/T//A             | nonsynonymous | 0 | 2 |
| ZNF622   | chr5  | 16465616/C//A              | synonymous    | 0 | 2 |
| IL7R     | chr5  | 35867514/A//T              | nonsynonymous | 0 | 2 |
| PAPD4    | chr5  | 78937020/G//A              | nonsynonymous | 0 | 2 |
| PCDHA7   | chr5  | 140215522/C//T             | synonymous    | 0 | 2 |
| PCDHAC2  | chr5  | 140347709/G//A             | nonsynonymous | 0 | 2 |
| PCDHGB6  | chr5  | 140790074/T//C             | nonsynonymous | 0 | 2 |
| TENM2    | chr5  | 167645211/C//T             | nonsynonymous | 0 | 2 |
| FGFR4    | chr5  | 176519746/G//A             | nonsynonymous | 0 | 2 |
| C6orf10  | chr6  | 32261696/C//T              | nonsynonymous | 0 | 2 |
| MDGA1    | chr6  | 37616903/C//T              | synonymous    | 0 | 2 |
| TIAM2    | chr6  | 155450852/G//A             | synonymous    | 0 | 2 |
| HGF      | chr7  | 81372780/C//T              | nonsynonymous | 0 | 2 |
| DOCK4    | chr7  | 111509677/G//A             | nonsynonymous | 0 | 2 |
| CSMD1    | chr8  | 3045415/C//T               | nonsynonymous | 0 | 2 |
| SPIN1    | chr9  | 91077434/C//T              | nonsynonymous | 0 | 2 |
| TTC16    | chr9  | 130479679/C//T             | synonymous    | 0 | 2 |
| ZEB1     | chr10 | 31809845/G//T              | nonsynonymous | 0 | 2 |
| PPIF     | chr10 | 81111308/C//T              | synonymous    | 0 | 2 |
| AHNAK    | chr11 | 62297794/G//A              | synonymous    | 0 | 2 |
| CD163    | chr12 | 7636108/T//A               | nonsynonymous | 0 | 2 |
| APOBEC1  | chr12 | 7805421/C//A               | nonsynonymous | 0 | 2 |
| AQP2     | chr12 | 50344571/C//A              | synonymous    | 0 | 2 |
| TNS2     | chr12 | 53453037/C//T              | nonsynonymous | 0 | 2 |
| PTPRB    | chr12 | 70948999/C//T              | nonsynonymous | 0 | 2 |

|           |       |                          |               |   |   |
|-----------|-------|--------------------------|---------------|---|---|
| MLNR      | chr13 | 49796404/C//T            | nonsynonymous | 0 | 2 |
| FANCM     | chr14 | 45628283/TTA//T          | nonsynonymous | 0 | 2 |
| CREBBP    | chr16 | 3781903/C//G             | nonsynonymous | 0 | 2 |
| MYH11     | chr16 | 15820824/TGGCCTG//T      | nonsynonymous | 0 | 2 |
| FBXL19    | chr16 | 30958241/C//T            | synonymous    | 0 | 2 |
| IRX6      | chr16 | 55362731/A//G            | nonsynonymous | 0 | 2 |
| PLCG2     | chr16 | 81939031/C//T            | synonymous    | 0 | 2 |
| MYO5B     | chr18 | 47431095/C//T            | nonsynonymous | 0 | 2 |
| ADGRE1    | chr19 | 6937658/C//T             | nonsynonymous | 0 | 2 |
| FBN3      | chr19 | 8152978/G//A             | synonymous    | 0 | 2 |
| ZNF560    | chr19 | 9577933/G//A             | nonsynonymous | 0 | 2 |
| ICAM3     | chr19 | 10446447/G//A            | synonymous    | 0 | 2 |
| ACP7      | chr19 | 39589642/G//A            | nonsynonymous | 0 | 2 |
| ZNF155    | chr19 | 44501401/C//A            | nonsynonymous | 0 | 2 |
|           | chr19 | 49464247/G//A            | synonymous    | 0 | 2 |
| OCSTAMP   | chr20 | 45174689/G//T            | synonymous    | 0 | 2 |
| FNDC11    | chr20 | 62187762/C//T            | nonsynonymous | 0 | 2 |
| PPM1F     | chr22 | 22285597/G//A            | nonsynonymous | 0 | 2 |
| IL1RAPL1  | chrX  | 29973828/G//A            | nonsynonymous | 0 | 2 |
| KLHL4     | chrX  | 86869549/T//A            | nonsynonymous | 0 | 2 |
| RGAG1     | chrX  | 109697441/G//C           | nonsynonymous | 0 | 2 |
| CAMTA1    | chr1  | 7723800/C//T             | nonsynonymous | 0 | 2 |
| IFI44L    | chr1  | 79093956/C//T            | nonsynonymous | 0 | 2 |
| PLXNA2    | chr1  | 208390159/C//T           | nonsynonymous | 0 | 2 |
| SPRTN     | chr1  | 231488837/T//G           | synonymous    | 0 | 2 |
| MEIS1     | chr2  | 66739344/A//C            | nonsynonymous | 0 | 2 |
| DYSF      | chr2  | 71755471/C//T            | synonymous    | 0 | 2 |
| SCN7A     | chr2  | 167263067/G//A           | nonsynonymous | 0 | 2 |
| LRP2      | chr2  | 170044681/G//A           | nonsynonymous | 0 | 2 |
| TTN       | chr2  | 179639685/A//G           | synonymous    | 0 | 2 |
| TTL4      | chr2  | 219611877/C//T           | nonsynonymous | 0 | 2 |
| LHFPL4    | chr3  | 9594226/C//T             | nonsynonymous | 0 | 2 |
| SLC6A11   | chr3  | 10916701/G//A            | nonsynonymous | 0 | 2 |
| DCBLD2    | chr3  | 98518560/C//A            | nonsynonymous | 0 | 2 |
| COPG1     | chr3  | 128979179/T//G           | nonsynonymous | 0 | 2 |
| CEP70     | chr3  | 138216922/T//A           | nonsynonymous | 0 | 2 |
| MCF2L2    | chr3  | 182897473/C//A           | nonsynonymous | 0 | 2 |
| TMPRSS11F | chr4  | 68930433/C//T            | nonsynonymous | 0 | 2 |
| ENAM      | chr4  | 71495230/C//T            | nonsynonymous | 0 | 2 |
| PDLIM5    | chr4  | 95496909/C//T            | nonsynonymous | 0 | 2 |
| ADH4      | chr4  | 100048388/G//T           | synonymous    | 0 | 2 |
| UGT3A1    | chr5  | 35955903/C//T            | nonsynonymous | 0 | 2 |
| PITX1     | chr5  | 134364597/C//T           | nonsynonymous | 0 | 2 |
| FLT4      | chr5  | 180047286/G//A           | nonsynonymous | 0 | 2 |
| GRIK2     | chr6  | 102134198/C//T           | synonymous    | 0 | 2 |
| FOXO3     | chr6  | 108985058/C//T           | nonsynonymous | 0 | 2 |
| AKAP12    | chr6  | 151670781/G//C           | nonsynonymous | 0 | 2 |
| IDO2      | chr8  | 39840287/C//T            | synonymous    | 0 | 2 |
| FAM83H    | chr8  | 144809386/C//T           | nonsynonymous | 0 | 2 |
| SPATA31D1 | chr9  | 84609179/G//A            | nonsynonymous | 0 | 2 |
| TNC       | chr9  | 117848337/C//A           | nonsynonymous | 0 | 2 |
|           | chr9  | 130529487/C//T           | synonymous    | 0 | 2 |
| PTGES     | chr9  | 132501843/C//T           | synonymous    | 0 | 2 |
| CAMSAP1   | chr9  | 138713625/T//A           | nonsynonymous | 0 | 2 |
| CYP2C9    | chr10 | 96748635/C//T            | synonymous    | 0 | 2 |
| TCF7L2    | chr10 | 114920402/G//A           | nonsynonymous | 0 | 2 |
| SSRP1     | chr11 | 57100235/C//G            | nonsynonymous | 0 | 2 |
| ZP1       | chr11 | 60640892/G//A            | nonsynonymous | 0 | 2 |
| SIPA1     | chr11 | 65408752/C//T            | synonymous    | 0 | 2 |
| NDUFV1    | chr11 | 67374452/A//C            | synonymous    | 0 | 2 |
| HIKESHI   | chr11 | 86013450/C//T            | synonymous    | 0 | 2 |
| OPCML     | chr11 | 132527154/G//A           | synonymous    | 0 | 2 |
| FKBP4     | chr12 | 2910433/G//A             | nonsynonymous | 0 | 2 |
| GLI1      | chr12 | 57858986/G//A            | nonsynonymous | 0 | 2 |
| ZC3H13    | chr13 | 46539484/C//T            | nonsynonymous | 0 | 2 |
| ANKRD9    | chr14 | 102974154/G//A           | nonsynonymous | 0 | 2 |
| AHNAK2    | chr14 | 105409226/C//T           | nonsynonymous | 0 | 2 |
| TP53      | chr17 | 7577139/G//C             | nonsynonymous | 0 | 2 |
| PIK3R5    | chr17 | 8791712/G//A             | synonymous    | 0 | 2 |
| TRAF4     | chr17 | 27074841/TCCCCATCCCTA//T | nonsynonymous | 0 | 2 |

|          |       |                 |               |   |   |
|----------|-------|-----------------|---------------|---|---|
| GPR179   | chr17 | 36489255/C//T   | nonsynonymous | 0 | 2 |
| TCAP     | chr17 | 37821645/G//A   | synonymous    | 0 | 2 |
| TMC6     | chr17 | 76121807/C//T   | nonsynonymous | 0 | 2 |
| TSHZ3    | chr19 | 31767470/C//A   | nonsynonymous | 0 | 2 |
| B9D2     | chr19 | 41860701/G//A   | synonymous    | 0 | 2 |
| RSPH6A   | chr19 | 46313870/C//T   | synonymous    | 0 | 2 |
| EMC10    | chr19 | 50983941/G//A   | nonsynonymous | 0 | 2 |
| CFAP61   | chr20 | 20257861/C//T   | nonsynonymous | 0 | 2 |
| CDH4     | chr20 | 60448849/C//T   | nonsynonymous | 0 | 2 |
| KDM6A    | chrX  | 44929133/G//T   | nonsynonymous | 0 | 2 |
| DACH2    | chrX  | 85769337/C//T   | nonsynonymous | 0 | 2 |
| PLP1     | chrX  | 103041545/G//A  | nonsynonymous | 0 | 2 |
| LRRC7    | chr1  | 70486713/T//C   | synonymous    | 0 | 2 |
| HRNR     | chr1  | 152191793/C//A  | nonsynonymous | 0 | 2 |
| CD5L     | chr1  | 157804297/C//A  | nonsynonymous | 0 | 2 |
| QSOX1    | chr1  | 180166009/G//T  | nonsynonymous | 0 | 2 |
| DHX9     | chr1  | 182827993/G//T  | nonsynonymous | 0 | 2 |
| CNTNAP5  | chr2  | 124999880/C//T  | synonymous    | 0 | 2 |
| ITGA4    | chr2  | 182350694/C//T  | synonymous    | 0 | 2 |
| KCNJ13   | chr2  | 233633251/G//C  | nonsynonymous | 0 | 2 |
| RAF1     | chr3  | 12645699/G//A   | nonsynonymous | 0 | 2 |
| ZKSCAN7  | chr3  | 44598526/T//C   | synonymous    | 0 | 2 |
| BSN      | chr3  | 49691542/C//A   | nonsynonymous | 0 | 2 |
| ADAMTS9  | chr3  | 64672386/G//A   | nonsynonymous | 0 | 2 |
| SHOX2    | chr3  | 157817721/G//T  | synonymous    | 0 | 2 |
| PAK2     | chr3  | 196530018/T//A  | nonsynonymous | 0 | 2 |
| PRDM5    | chr4  | 121631494/C//T  | synonymous    | 0 | 2 |
| KIAA1109 | chr4  | 123128331/A//G  | nonsynonymous | 0 | 2 |
| HELT     | chr4  | 185941627/G//A  | nonsynonymous | 0 | 2 |
| CWC27    | chr5  | 64267525/T//G   | synonymous    | 0 | 2 |
| APC      | chr5  | 112170864/T//C  | nonsynonymous | 0 | 2 |
| DAAM2    | chr6  | 39869681/C//A   | nonsynonymous | 0 | 2 |
| TBX18    | chr6  | 85457773/C//T   | synonymous    | 0 | 2 |
| RTN4IP1  | chr6  | 107076875/C//T  | nonsynonymous | 0 | 2 |
| STK31    | chr7  | 23871924/C//T   | nonsynonymous | 0 | 2 |
| ARF5     | chr7  | 127228594/G//A  | synonymous    | 0 | 2 |
| NOBOX    | chr7  | 144098453/C//A  | nonsynonymous | 0 | 2 |
| LOXL2    | chr8  | 23225536/G//T   | nonsynonymous | 0 | 2 |
| DMRT3    | chr9  | 990483/C//T     | synonymous    | 0 | 2 |
| IKBKAP   | chr9  | 111641032/T//A  | nonsynonymous | 0 | 2 |
| ARHGAP21 | chr10 | 24884718/G//A   | nonsynonymous | 0 | 2 |
| PTCHD3   | chr10 | 27702276/C//T   | nonsynonymous | 0 | 2 |
| FAS      | chr10 | 90767508/T//G   | nonsynonymous | 0 | 2 |
| CFAP43   | chr10 | 105942151/T//C  | synonymous    | 0 | 2 |
| TCF7L2   | chr10 | 114920404/G//T  | nonsynonymous | 0 | 2 |
| OR5P3    | chr11 | 7847244/G//T    | synonymous    | 0 | 2 |
| OR4A5    | chr11 | 51412067/A//T   | nonsynonymous | 0 | 2 |
| OR5L1    | chr11 | 55578986/T//C   | nonsynonymous | 0 | 2 |
| OR5B2    | chr11 | 58190376/C//T   | nonsynonymous | 0 | 2 |
| HSPA8    | chr11 | 122928630/G//T  | synonymous    | 0 | 2 |
| DERA     | chr12 | 16109906/C//T   | nonsynonymous | 0 | 2 |
| GALNT6   | chr12 | 51754523/G//A   | synonymous    | 0 | 2 |
| KRT78    | chr12 | 53241867/C//T   | synonymous    | 0 | 2 |
| TMEM132D | chr12 | 129563223/AG//A | nonsynonymous | 0 | 2 |
| BRCA2    | chr13 | 32910553/T//G   | nonsynonymous | 0 | 2 |
| MYO16    | chr13 | 109792839/G//A  | nonsynonymous | 0 | 2 |
| OR4M1    | chr14 | 20249096/G//T   | synonymous    | 0 | 2 |
| FAM179B  | chr14 | 45475282/G//C   | nonsynonymous | 0 | 2 |
| CACNA1H  | chr16 | 1263776/G//T    | synonymous    | 0 | 2 |
| MYH11    | chr16 | 15876241/C//T   | nonsynonymous | 0 | 2 |
| RNF40    | chr16 | 30783454/G//A   | synonymous    | 0 | 2 |
| PIEZO1   | chr16 | 88800780/G//A   | nonsynonymous | 0 | 2 |
| INPP5K   | chr17 | 1399652/G//A    | synonymous    | 0 | 2 |
| MYH4     | chr17 | 10369637/C//T   | nonsynonymous | 0 | 2 |
| MYO18A   | chr17 | 27423853/A//G   | synonymous    | 0 | 2 |
| HOXB6    | chr17 | 46675286/G//A   | nonsynonymous | 0 | 2 |
| APC2     | chr19 | 1453491/G//A    | synonymous    | 0 | 2 |
| ADAMTS10 | chr19 | 8650462/C//T    | nonsynonymous | 0 | 2 |
| FUT1     | chr19 | 49253669/C//T   | synonymous    | 0 | 2 |
| LRRC4B   | chr19 | 51022293/G//A   | nonsynonymous | 0 | 2 |

|          |       |                          |               |   |   |
|----------|-------|--------------------------|---------------|---|---|
| KMT5C    | chr19 | 55854165/G//T            | nonsynonymous | 0 | 2 |
| PEG3     | chr19 | 57327460/A//G            | nonsynonymous | 0 | 2 |
| STK4     | chr20 | 43629826/TCTGGCACGATGGTT | nonsynonymous | 0 | 2 |
| PCK1     | chr20 | 56139658/G//A            | nonsynonymous | 0 | 2 |
| COL9A3   | chr20 | 61461755/G//A            | nonsynonymous | 0 | 2 |
| TIAM1    | chr21 | 32624094/G//A            | nonsynonymous | 0 | 2 |
| SPECC1L  | chr22 | 24709364/C//G            | nonsynonymous | 0 | 2 |
| PASD1    | chrX  | 150832640/C//A           | nonsynonymous | 0 | 2 |
| ECE1     | chr1  | 21551775/C//T            | nonsynonymous | 0 | 2 |
| C8A      | chr1  | 57373778/G//A            | nonsynonymous | 0 | 2 |
| MCL1     | chr1  | 150551905/TCGCCCTCCCGGGC | nonsynonymous | 0 | 2 |
| IGFN1    | chr1  | 201175370/C//T           | nonsynonymous | 0 | 2 |
| ATP2B4   | chr1  | 203678532/G//A           | nonsynonymous | 0 | 2 |
| PROX1    | chr1  | 214209168/T//A           | synonymous    | 0 | 2 |
| OBSCN    | chr1  | 228474735/T//A           | nonsynonymous | 0 | 2 |
| ALLC     | chr2  | 3744999/A//G             | nonsynonymous | 0 | 2 |
| DYSF     | chr2  | 71913688/C//T            | synonymous    | 0 | 2 |
| FER1L5   | chr2  | 97368466/C//T            | synonymous    | 0 | 2 |
| LONRF2   | chr2  | 100900912/C//T           | nonsynonymous | 0 | 2 |
| SCTR     | chr2  | 120252125/C//T           | nonsynonymous | 0 | 2 |
| TTN      | chr2  | 179584079/G//A           | nonsynonymous | 0 | 2 |
| HDAC4    | chr2  | 240056298/G//A           | synonymous    | 0 | 2 |
| PDCD6IP  | chr3  | 33885677/G//A            | nonsynonymous | 0 | 2 |
| DNAH1    | chr3  | 52430754/C//T            | nonsynonymous | 0 | 2 |
| CCDC80   | chr3  | 112357368/C//T           | nonsynonymous | 0 | 2 |
| ZBBX     | chr3  | 167086345/C//T           | nonsynonymous | 0 | 2 |
| TBL1XR1  | chr3  | 176768329/C//T           | nonsynonymous | 0 | 2 |
| ECE2     | chr3  | 184008894/G//A           | nonsynonymous | 0 | 2 |
| FDCSP    | chr4  | 71099843/G//A            | nonsynonymous | 0 | 2 |
| HSD17B11 | chr4  | 88261668/A//C            | synonymous    | 0 | 2 |
| CTNND2   | chr5  | 11082938/G//A            | synonymous    | 0 | 2 |
| TRIO     | chr5  | 14399169/G//A            | nonsynonymous | 0 | 2 |
| RAPGEF6  | chr5  | 130766721/A//C           | nonsynonymous | 0 | 2 |
| PCDHA12  | chr5  | 140255780/G//A           | synonymous    | 0 | 2 |
| LARP1    | chr5  | 154181859/A//G           | nonsynonymous | 0 | 2 |
| HCG4     | chr6  | 29760561/T//C            | synonymous    | 0 | 2 |
| KLC4     | chr6  | 43038532/C//T            | nonsynonymous | 0 | 2 |
| SYNE1    | chr6  | 152652399/C//T           | nonsynonymous | 0 | 2 |
| TCTE3    | chr6  | 170140249/G//A           | synonymous    | 0 | 2 |
| AIMP2    | chr7  | 6048934/T//G             | synonymous    | 0 | 2 |
| FAM126A  | chr7  | 22985434/G//A            | nonsynonymous | 0 | 2 |
| NOD1     | chr7  | 30491333/C//T            | nonsynonymous | 0 | 2 |
| ADAM22   | chr7  | 87743914/C//T            | synonymous    | 0 | 2 |
| CPED1    | chr7  | 120884298/C//T           | nonsynonymous | 0 | 2 |
| DLGAP2   | chr8  | 1497054/C//T             | synonymous    | 0 | 2 |
| CSMD1    | chr8  | 3057245/C//T             | nonsynonymous | 0 | 2 |
| GFRA2    | chr8  | 21632502/G//A            | nonsynonymous | 0 | 2 |
| UBAP2    | chr9  | 33956082/C//T            | synonymous    | 0 | 2 |
| AKR1E2   | chr10 | 4889406/C//A             | nonsynonymous | 0 | 2 |
| ITIH5    | chr10 | 7621738/G//A             | synonymous    | 0 | 2 |
| OR51G1   | chr11 | 4945161/C//T             | nonsynonymous | 0 | 2 |
| AMBRA1   | chr11 | 46430124/G//A            | synonymous    | 0 | 2 |
| OR4C13   | chr11 | 49974970/G//T            | synonymous    | 0 | 2 |
| OR6Q1    | chr11 | 57798846/C//T            | nonsynonymous | 0 | 2 |
| GDPD5    | chr11 | 75160109/G//A            | synonymous    | 0 | 2 |
| KIRREL3  | chr11 | 126391225/G//A           | nonsynonymous | 0 | 2 |
| ADAMTS20 | chr12 | 43819382/C//T            | nonsynonymous | 0 | 2 |
| C12orf42 | chr12 | 103700000/C//T           | nonsynonymous | 0 | 2 |
| MYL2     | chr12 | 111358330/C//T           | nonsynonymous | 0 | 2 |
| GJA3     | chr13 | 20716272/C//T            | nonsynonymous | 0 | 2 |
| LATS2    | chr13 | 21557735/C//T            | nonsynonymous | 0 | 2 |
| RNF17    | chr13 | 25418809/G//T            | nonsynonymous | 0 | 2 |
| SPERT    | chr13 | 46287865/C//T            | synonymous    | 0 | 2 |
| CPB2     | chr13 | 46656636/G//A            | synonymous    | 0 | 2 |
| COL4A1   | chr13 | 110823045/G//A           | synonymous    | 0 | 2 |
| SFTA3    | chr14 | 36946213/G//A            | nonsynonymous | 0 | 2 |
| LRRC74A  | chr14 | 77336556/G//A            | synonymous    | 0 | 2 |
| SEPT12   | chr16 | 4835998/AG//A            | nonsynonymous | 0 | 2 |
| AXIN2    | chr17 | 63554657/C//T            | nonsynonymous | 0 | 2 |
| CARD14   | chr17 | 78171953/C//T            | synonymous    | 0 | 2 |

|          |       |                 |               |   |   |
|----------|-------|-----------------|---------------|---|---|
| CBLN2    | chr18 | 70205461/C//T   | nonsynonymous | 0 | 2 |
| THEG     | chr19 | 374015/C//T     | synonymous    | 0 | 2 |
| DNMT1    | chr19 | 10270744/G//C   | synonymous    | 0 | 2 |
| TMEM221  | chr19 | 17547644/C//A   | nonsynonymous | 0 | 2 |
| ZNF526   | chr19 | 42729489/C//T   | nonsynonymous | 0 | 2 |
| FPR1     | chr19 | 52249881/G//A   | nonsynonymous | 0 | 2 |
| PPP2R1A  | chr19 | 52715982/C//T   | nonsynonymous | 0 | 2 |
| BIRC8    | chr19 | 53793270/G//A   | nonsynonymous | 0 | 2 |
| GZF1     | chr20 | 23345225/AGT//A | nonsynonymous | 0 | 2 |
| LAMA5    | chr20 | 60899182/C//T   | nonsynonymous | 0 | 2 |
| MICAL3   | chr22 | 18300834/G//T   | nonsynonymous | 0 | 2 |
| MGAT3    | chr22 | 39884331/G//A   | nonsynonymous | 0 | 2 |
| SSX3     | chrX  | 48214650/G//A   | nonsynonymous | 0 | 2 |
| NRK      | chrX  | 105066794/G//A  | synonymous    | 0 | 2 |
| FAM213B  | chr1  | 2520877/G//A    | synonymous    | 0 | 2 |
| SH2D5    | chr1  | 21049310/G//A   | nonsynonymous | 0 | 2 |
| C1QB     | chr1  | 22987524/G//A   | nonsynonymous | 0 | 2 |
| GNL2     | chr1  | 38056437/C//A   | nonsynonymous | 0 | 2 |
| PODN     | chr1  | 53546439/G//A   | nonsynonymous | 0 | 2 |
| PRMT6    | chr1  | 107600225/C//A  | nonsynonymous | 0 | 2 |
| CACNA1E  | chr1  | 181731751/C//T  | synonymous    | 0 | 2 |
| RYR2     | chr1  | 237955613/A//C  | nonsynonymous | 0 | 2 |
| KIF26B   | chr1  | 245849809/C//T  | nonsynonymous | 0 | 2 |
| ZNF513   | chr2  | 27600703/C//A   | synonymous    | 0 | 2 |
| STON1    | chr2  | 48808268/C//A   | nonsynonymous | 0 | 2 |
| NRXN1    | chr2  | 50850512/C//A   | synonymous    | 0 | 2 |
| SFXN5    | chr2  | 73226130/G//A   | nonsynonymous | 0 | 2 |
| MAP3K19  | chr2  | 135749117/C//T  | nonsynonymous | 0 | 2 |
| ARHGAP15 | chr2  | 144381721/C//T  | synonymous    | 0 | 2 |
| STAT4    | chr2  | 191929525/C//A  | synonymous    | 0 | 2 |
| MST1     | chr3  | 49723305/G//A   | nonsynonymous | 0 | 2 |
| PARP9    | chr3  | 122274665/A//G  | nonsynonymous | 0 | 2 |
| UMPS     | chr3  | 124449214/T//C  | synonymous    | 0 | 2 |
| GRXCR1   | chr4  | 43032468/C//T   | nonsynonymous | 0 | 2 |
| PCDH10   | chr4  | 134072693/G//A  | synonymous    | 0 | 2 |
| HMGCR    | chr5  | 74655296/T//G   | nonsynonymous | 0 | 2 |
| PCDHA11  | chr5  | 140250554/C//T  | synonymous    | 0 | 2 |
| PCDHAC2  | chr5  | 140346777/C//T  | synonymous    | 0 | 2 |
| FAT2     | chr5  | 150911165/C//T  | nonsynonymous | 0 | 2 |
| ZSCAN12  | chr6  | 28366007/C//A   | nonsynonymous | 0 | 2 |
| BACH2    | chr6  | 90660863/G//A   | nonsynonymous | 0 | 2 |
| FYN      | chr6  | 111995778/G//A  | synonymous    | 0 | 2 |
| ROS1     | chr6  | 117718079/T//A  | nonsynonymous | 0 | 2 |
| KIAA0408 | chr6  | 127765360/C//T  | nonsynonymous | 0 | 2 |
| SDK1     | chr7  | 4249744/G//A    | nonsynonymous | 0 | 2 |
| AOAH     | chr7  | 36580001/G//T   | synonymous    | 0 | 2 |
| GLI3     | chr7  | 42004777/C//T   | synonymous    | 0 | 2 |
| ZNF789   | chr7  | 99084545/T//A   | nonsynonymous | 0 | 2 |
| NUB1     | chr7  | 151065011/A//T  | nonsynonymous | 0 | 2 |
| LYN      | chr8  | 56922678/G//T   | synonymous    | 0 | 2 |
| KLHL38   | chr8  | 124658060/G//A  | synonymous    | 0 | 2 |
| MTSS1    | chr8  | 125568569/G//T  | nonsynonymous | 0 | 2 |
| NRAP     | chr10 | 115406711/C//T  | nonsynonymous | 0 | 2 |
| EIF3A    | chr10 | 120801889/G//A  | nonsynonymous | 0 | 2 |
| PANX3    | chr11 | 124487339/G//A  | nonsynonymous | 0 | 2 |
| IQSEC3   | chr12 | 247858/C//T     | synonymous    | 0 | 2 |
| A2ML1    | chr12 | 9010551/G//A    | synonymous    | 0 | 2 |
| SLC38A1  | chr12 | 46602843/C//G   | nonsynonymous | 0 | 2 |
| KMT5A    | chr12 | 123892134/G//A  | nonsynonymous | 0 | 2 |
| FZD10    | chr12 | 130647943/C//G  | nonsynonymous | 0 | 2 |
| TRPC4    | chr13 | 38266260/T//C   | synonymous    | 0 | 2 |
| TGDS     | chr13 | 95246124/G//A   | nonsynonymous | 0 | 2 |
| MYO16    | chr13 | 109753151/T//C  | synonymous    | 0 | 2 |
| MBIP     | chr14 | 36768231/A//G   | synonymous    | 0 | 2 |
| DCAF4    | chr14 | 73422355/G//A   | nonsynonymous | 0 | 2 |
| ABCA3    | chr16 | 2331096/C//T    | nonsynonymous | 0 | 2 |
| PPL      | chr16 | 4953882/C//T    | synonymous    | 0 | 2 |
| PDILT    | chr16 | 20386176/C//T   | nonsynonymous | 0 | 2 |
| DNAH3    | chr16 | 20946714/G//A   | nonsynonymous | 0 | 2 |
| SH2B1    | chr16 | 28880552/G//A   | nonsynonymous | 0 | 2 |

|          |       |                           |               |   |   |
|----------|-------|---------------------------|---------------|---|---|
| CX3CL1   | chr16 | 57416074/C//T             | synonymous    | 0 | 2 |
| HOXB2    | chr17 | 46620402/G//A             | synonymous    | 0 | 2 |
| WFIKKN2  | chr17 | 48917544/G//C             | nonsynonymous | 0 | 2 |
| FOXJ1    | chr17 | 74134149/C//T             | nonsynonymous | 0 | 2 |
| FASN     | chr17 | 80043361/G//T             | nonsynonymous | 0 | 2 |
| ADAMTS10 | chr19 | 8650468/G//A              | nonsynonymous | 0 | 2 |
| SMARCA4  | chr19 | 11144072/C//A             | nonsynonymous | 0 | 2 |
| NOTCH3   | chr19 | 15290912/G//A             | nonsynonymous | 0 | 2 |
| LRRC25   | chr19 | 18507178/C//T             | nonsynonymous | 0 | 2 |
| FFAR1    | chr19 | 35843150/G//A             | synonymous    | 0 | 2 |
| ZNF222   | chr19 | 44536820/T//G             | nonsynonymous | 0 | 2 |
| BPIFB6   | chr20 | 31625457/G//A             | synonymous    | 0 | 2 |
| WDR4     | chr21 | 44270219/C//A             | synonymous    | 0 | 2 |
| SRPX     | chrX  | 38079975/C//CGCA          | nonsynonymous | 0 | 2 |
| USP11    | chrX  | 47100800/A//G             | nonsynonymous | 0 | 2 |
| TESK2    | chr1  | 45887414/G//A             | synonymous    | 0 | 2 |
| DCAF8    | chr1  | 160206935/G//A            | nonsynonymous | 0 | 2 |
| HEATR5B  | chr2  | 37306396/G//A             | nonsynonymous | 0 | 2 |
| PUS10    | chr2  | 61172166/T//C             | nonsynonymous | 0 | 2 |
| CFAP65   | chr2  | 219867731/C//T            | synonymous    | 0 | 2 |
| ACTR8    | chr3  | 53902802/C//T             | nonsynonymous | 0 | 2 |
| MAGI1    | chr3  | 65350364/C//T             | synonymous    | 0 | 2 |
| USF3     | chr3  | 113392204/GTGTCTCCCGGTTTT | nonsynonymous | 0 | 2 |
| NMD3     | chr3  | 160967265/C//T            | synonymous    | 0 | 2 |
| NCEH1    | chr3  | 172351279/C//G            | nonsynonymous | 0 | 2 |
| NLGN1    | chr3  | 173993172/A//C            | nonsynonymous | 0 | 2 |
| UGT2B11  | chr4  | 70079712/A//T             | synonymous    | 0 | 2 |
| ARHGAP10 | chr4  | 148796175/C//T            | nonsynonymous | 0 | 2 |
| DNAH5    | chr5  | 13862716/C//T             | synonymous    | 0 | 2 |
| IL7R     | chr5  | 35871196/C//A             | synonymous    | 0 | 2 |
| PARP8    | chr5  | 50057714/A//G             | synonymous    | 0 | 2 |
| FBN2     | chr5  | 127674754/C//G            | nonsynonymous | 0 | 2 |
| KDM3B    | chr5  | 137761134/A//G            | nonsynonymous | 0 | 2 |
| PCDHA7   | chr5  | 140215249/G//A            | synonymous    | 0 | 2 |
| SLIT3    | chr5  | 168137998/G//A            | nonsynonymous | 0 | 2 |
| HTR1E    | chr6  | 87725612/C//T             | nonsynonymous | 0 | 2 |
| GJA10    | chr6  | 90605509/G//GACATC        | nonsynonymous | 0 | 2 |
| EPHA7    | chr6  | 93965748/T//A             | nonsynonymous | 0 | 2 |
| OSTM1    | chr6  | 108395521/CAG//C          | nonsynonymous | 0 | 2 |
| UTRN     | chr6  | 144860503/C//G            | nonsynonymous | 0 | 2 |
| GINM1    | chr6  | 149900993/A//C            | nonsynonymous | 0 | 2 |
| CCDC129  | chr7  | 31617627/G//A             | nonsynonymous | 0 | 2 |
| CFTR     | chr7  | 117180285/G//A            | nonsynonymous | 0 | 2 |
| WRN      | chr8  | 30921904/T//C             | synonymous    | 0 | 2 |
| TMEM74   | chr8  | 109796964/G//A            | nonsynonymous | 0 | 2 |
| ADGRB1   | chr8  | 143604078/C//T            | synonymous    | 0 | 2 |
| RECQL4   | chr8  | 145742130/G//A            | nonsynonymous | 0 | 2 |
| CEL      | chr9  | 135942291/C//A            | nonsynonymous | 0 | 2 |
| SEC16A   | chr9  | 139370315/G//A            | nonsynonymous | 0 | 2 |
| MRGPRE   | chr11 | 3249856/G//A              | synonymous    | 0 | 2 |
| APBB1    | chr11 | 6424583/C//T              | nonsynonymous | 0 | 2 |
| FAT3     | chr11 | 92086160/G//T             | synonymous    | 0 | 2 |
| BSX      | chr11 | 122852256/C//T            | nonsynonymous | 0 | 2 |
| GRAMD1B  | chr11 | 123489466/C//T            | nonsynonymous | 0 | 2 |
| CBX5     | chr12 | 54651349/C//T             | nonsynonymous | 0 | 2 |
| PROSER1  | chr13 | 39588297/G//T             | synonymous    | 0 | 2 |
| F7       | chr13 | 113770069/G//A            | nonsynonymous | 0 | 2 |
| MOK      | chr14 | 102717163/G//C            | nonsynonymous | 0 | 2 |
| FBN1     | chr15 | 48707932/C//T             | nonsynonymous | 0 | 2 |
| CCDC154  | chr16 | 1486005/G//A              | nonsynonymous | 0 | 2 |
| SEC14L5  | chr16 | 5064997/C//T              | synonymous    | 0 | 2 |
| CCDC113  | chr16 | 58314676/A//T             | synonymous    | 0 | 2 |
| VEZF1    | chr17 | 56060147/T//C             | nonsynonymous | 0 | 2 |
| UNC13D   | chr17 | 73831953/G//A             | nonsynonymous | 0 | 2 |
| RTTN     | chr18 | 67742760/A//T             | nonsynonymous | 0 | 2 |
| ZSWIM4   | chr19 | 13928047/TCCA//T          | nonsynonymous | 0 | 2 |
| KLHL26   | chr19 | 18779306/G//A             | nonsynonymous | 0 | 2 |
| PROKR2   | chr20 | 5294763/G//A              | nonsynonymous | 0 | 2 |
| DZANK1   | chr20 | 18414375/G//A             | nonsynonymous | 0 | 2 |
| FNDC11   | chr20 | 62187657/G//A             | nonsynonymous | 0 | 2 |



|             |       |                           |               |   |   |
|-------------|-------|---------------------------|---------------|---|---|
| TPTE        | chr21 | 10934035/T//G             | synonymous    | 0 | 2 |
| RWDD2B      | chr21 | 30391617/T//C             | synonymous    | 0 | 2 |
| MX2         | chr21 | 42754364/G//A             | nonsynonymous | 0 | 2 |
| RFPL3       | chr22 | 32754420/G//A             | nonsynonymous | 0 | 2 |
| MSL3        | chrX  | 11783633/C//T             | nonsynonymous | 0 | 2 |
| MBTPS2      | chrX  | 21871489/C//T             | synonymous    | 0 | 2 |
| PPP1R3F     | chrX  | 49126925/A//G             | nonsynonymous | 0 | 2 |
| ARHGAP36    | chrX  | 130217871/C//T            | synonymous    | 0 | 2 |
| SPANXN3     | chrX  | 142596998/A//C            | synonymous    | 0 | 2 |
| PTGFRN      | chr1  | 117527548/C//T            | nonsynonymous | 0 | 2 |
| MSTO1       | chr1  | 155582731/C//A            | nonsynonymous | 0 | 2 |
| OR2T6       | chr1  | 248551152/G//T            | nonsynonymous | 0 | 2 |
| KIDINS220   | chr2  | 8874786/G//A              | nonsynonymous | 0 | 2 |
| GCFC2       | chr2  | 75900601/C//G             | nonsynonymous | 0 | 2 |
| TCF7L1      | chr2  | 85532424/C//T             | nonsynonymous | 0 | 2 |
| NEB         | chr2  | 152411476/C//T            | nonsynonymous | 0 | 2 |
| LRP2        | chr2  | 170003430/G//A            | synonymous    | 0 | 2 |
| OTOS        | chr2  | 241078536/C//T            | synonymous    | 0 | 2 |
| PARP14      | chr3  | 122437079/G//T            | nonsynonymous | 0 | 2 |
| CFAP99      | chr4  | 2452697/T//A              | synonymous    | 0 | 2 |
| ANAPC4      | chr4  | 25415267/A//G             | nonsynonymous | 0 | 2 |
| PDGFRA      | chr4  | 55152093/A//T             | nonsynonymous | 0 | 2 |
| TNXB        | chr6  | 32023660/C//T             | nonsynonymous | 0 | 2 |
| RBAK-RBAKDN | chr7  | 5096949/G//T              | synonymous    | 0 | 2 |
|             | chr7  | 18201897/C//T             | synonymous    | 0 | 2 |
| POU6F2      | chr7  | 39503937/G//A             | synonymous    | 0 | 2 |
| PKHD1L1     | chr8  | 110476857/G//C            | nonsynonymous | 0 | 2 |
| TSC1        | chr9  | 135782182/ATCACTTAGAGTGAC | nonsynonymous | 0 | 2 |
| SLC17A6     | chr11 | 22363122/G//A             | synonymous    | 0 | 2 |
| APIP        | chr11 | 34912080/G//A             | nonsynonymous | 0 | 2 |
| YPEL4       | chr11 | 57414250/A//G             | synonymous    | 0 | 2 |
| ZDHHC5      | chr11 | 57466446/A//G             | nonsynonymous | 0 | 2 |
| MAP3K11     | chr11 | 65365989/G//T             | nonsynonymous | 0 | 2 |
| LRRK2       | chr12 | 40618982/A//G             | nonsynonymous | 0 | 2 |
| TSFM        | chr12 | 58189959/G//A             | nonsynonymous | 0 | 2 |
| NUDT21      | chr16 | 56485007/G//A             | synonymous    | 0 | 2 |
| ZNF385C     | chr17 | 40180813/C//T             | nonsynonymous | 0 | 2 |
| DSC3        | chr18 | 28611146/T//C             | synonymous    | 0 | 2 |
| GRAMD1A     | chr19 | 35500336/A//T             | nonsynonymous | 0 | 2 |
| LILRA3      | chr19 | 54803751/G//A             | nonsynonymous | 0 | 2 |
| AP1B1       | chr22 | 29727508/G//C             | nonsynonymous | 0 | 2 |
| ZNF676      | chr19 | 22363610/A//G             | synonymous    | 1 | 1 |
| ARHGEF16    | chr1  | 3396094/C//T              | nonsynonymous | 0 | 2 |
| LAPTM5      | chr1  | 31230568/G//A             | nonsynonymous | 0 | 2 |
| GNL2        | chr1  | 38042024/C//T             | synonymous    | 0 | 2 |
| MROH7       | chr1  | 55158132/G//A             | nonsynonymous | 0 | 2 |
|             | chr1  | 154131494/C//T            | synonymous    | 0 | 2 |
| ARHGEF11    | chr1  | 156915924/G//A            | synonymous    | 0 | 2 |
| TNR         | chr1  | 175335134/C//T            | nonsynonymous | 0 | 2 |
| HMCN1       | chr1  | 186089174/C//A            | synonymous    | 0 | 2 |
| CFH         | chr1  | 196697476/C//T            | nonsynonymous | 0 | 2 |
| SOX13       | chr1  | 204093952/G//A            | nonsynonymous | 0 | 2 |
| CD55        | chr1  | 207510701/C//A            | nonsynonymous | 0 | 2 |
| RCOR3       | chr1  | 211433487/G//A            | synonymous    | 0 | 2 |
| HHIPL2      | chr1  | 222717155/A//G            | nonsynonymous | 0 | 2 |
| TLR5        | chr1  | 223286273/C//T            | nonsynonymous | 0 | 2 |
| SOX11       | chr2  | 5833832/G//A              | nonsynonymous | 0 | 2 |
| GREB1       | chr2  | 11774317/G//A             | synonymous    | 0 | 2 |
| DNAJC27     | chr2  | 25180016/G//A             | nonsynonymous | 0 | 2 |
| C2orf71     | chr2  | 29293988/C//T             | nonsynonymous | 0 | 2 |
| CYP1B1      | chr2  | 38301932/G//A             | synonymous    | 0 | 2 |
| EML6        | chr2  | 55094009/A//C             | nonsynonymous | 0 | 2 |
| EML6        | chr2  | 55130533/A//G             | synonymous    | 0 | 2 |
| DCTN1       | chr2  | 74605336/C//T             | nonsynonymous | 0 | 2 |
| CTNNA2      | chr2  | 80136861/G//A             | nonsynonymous | 0 | 2 |
| RETSAT      | chr2  | 85573121/G//A             | nonsynonymous | 0 | 2 |
| ZAP70       | chr2  | 98351754/C//T             | nonsynonymous | 0 | 2 |
| ZAP70       | chr2  | 98354255/C//T             | synonymous    | 0 | 2 |
| VWA3B       | chr2  | 98737854/C//T             | nonsynonymous | 0 | 2 |
| SULT1C2     | chr2  | 108921879/G//A            | synonymous    | 0 | 2 |

|           |       |                    |               |   |   |
|-----------|-------|--------------------|---------------|---|---|
| PSD4      | chr2  | 113956750/C//T     | nonsynonymous | 0 | 2 |
| LRP1B     | chr2  | 141986816/G//A     | synonymous    | 0 | 2 |
| SCN1A     | chr2  | 166897971/C//A     | nonsynonymous | 0 | 2 |
| LRP2      | chr2  | 170011077/C//T     | nonsynonymous | 0 | 2 |
| TTN       | chr2  | 179605646/C//G     | nonsynonymous | 0 | 2 |
| MDH1B     | chr2  | 207619823/G//A     | nonsynonymous | 0 | 2 |
| SLC4A7    | chr3  | 27477943/C//T      | synonymous    | 0 | 2 |
| DCLK3     | chr3  | 36778833/A//G      | nonsynonymous | 0 | 2 |
| BSN       | chr3  | 49693617/AC//A     | nonsynonymous | 0 | 2 |
| OR5K4     | chr3  | 98073013/C//T      | nonsynonymous | 0 | 2 |
| ADPRH     | chr3  | 119305168/C//T     | nonsynonymous | 0 | 2 |
| PIK3CA    | chr3  | 178916941/GAAA//G  | nonsynonymous | 0 | 2 |
| DGKQ      | chr4  | 961354/C//T        | nonsynonymous | 0 | 2 |
| STIM2     | chr4  | 27024157/G//A      | nonsynonymous | 0 | 2 |
| ARHGAP24  | chr4  | 86921886/G//A      | synonymous    | 0 | 2 |
| ABCE1     | chr4  | 146025614/A//T     | nonsynonymous | 0 | 2 |
| FGG       | chr4  | 155530878/G//A     | synonymous    | 0 | 2 |
| FAM218A   | chr4  | 165878415/C//T     | nonsynonymous | 0 | 2 |
| KLHL2     | chr4  | 166239042/G//A     | synonymous    | 0 | 2 |
| TLL1      | chr4  | 167020440/C//T     | nonsynonymous | 0 | 2 |
| ADGRV1    | chr5  | 89968532/G//T      | nonsynonymous | 0 | 2 |
| CDO1      | chr5  | 115151945/G//A     | synonymous    | 0 | 2 |
| PCDHA2    | chr5  | 140176028/G//A     | synonymous    | 0 | 2 |
| PCDHGA1   | chr5  | 140711963/G//C     | nonsynonymous | 0 | 2 |
| RARS      | chr5  | 167919821/ATCAG//A | nonsynonymous | 0 | 2 |
|           | chr5  | 176917504/C//T     | synonymous    | 0 | 2 |
| FLT4      | chr5  | 180030261/C//T     | synonymous    | 0 | 2 |
| HIST1H2AM | chr6  | 27860732/G//A      | synonymous    | 0 | 2 |
| ZSCAN23   | chr6  | 28403896/G//A      | nonsynonymous | 0 | 2 |
| ADGRF4    | chr6  | 47682880/C//G      | nonsynonymous | 0 | 2 |
| ZNF451    | chr6  | 57018666/G//A      | nonsynonymous | 0 | 2 |
| EPHA7     | chr6  | 93982096/G//A      | nonsynonymous | 0 | 2 |
| MAS1      | chr6  | 160328810/G//A     | nonsynonymous | 0 | 2 |
| THSD7A    | chr7  | 11447009/C//A      | nonsynonymous | 0 | 2 |
| MYO1G     | chr7  | 45010636/G//A      | nonsynonymous | 0 | 2 |
| KCND2     | chr7  | 120385981/C//T     | nonsynonymous | 0 | 2 |
| ZNF800    | chr7  | 127014530/C//G     | nonsynonymous | 0 | 2 |
| TNPO3     | chr7  | 128622312/C//T     | nonsynonymous | 0 | 2 |
| DENND2A   | chr7  | 140301451/G//A     | synonymous    | 0 | 2 |
| OR2F1     | chr7  | 143657178/G//A     | nonsynonymous | 0 | 2 |
| PXDNL     | chr8  | 52320945/G//A      | nonsynonymous | 0 | 2 |
| CYP7B1    | chr8  | 65711080/A//G      | nonsynonymous | 0 | 2 |
| GML       | chr8  | 143921917/C//T     | nonsynonymous | 0 | 2 |
| IFNE      | chr9  | 21481267/G//T      | nonsynonymous | 0 | 2 |
| TAF1L     | chr9  | 32631823/C//T      | nonsynonymous | 0 | 2 |
| SHC3      | chr9  | 91656987/C//T      | synonymous    | 0 | 2 |
| C9orf84   | chr9  | 114484839/G//A     | nonsynonymous | 0 | 2 |
| TOR2A     | chr9  | 130494917/C//T     | nonsynonymous | 0 | 2 |
| DBH       | chr9  | 136513028/C//T     | nonsynonymous | 0 | 2 |
| SOHLH1    | chr9  | 138590296/C//T     | nonsynonymous | 0 | 2 |
| ITIH5     | chr10 | 7621854/G//A       | nonsynonymous | 0 | 2 |
| GPR158    | chr10 | 25887039/G//A      | synonymous    | 0 | 2 |
| PTCHD3    | chr10 | 27703184/T//A      | synonymous    | 0 | 2 |
| GDF2      | chr10 | 48413661/C//T      | nonsynonymous | 0 | 2 |
| NPFFR1    | chr10 | 72014923/G//A      | synonymous    | 0 | 2 |
| PYROXD2   | chr10 | 100147036/A//T     | synonymous    | 0 | 2 |
| TCF7L2    | chr10 | 114920401/C//T     | nonsynonymous | 0 | 2 |
| KCNK18    | chr10 | 118969094/G//A     | nonsynonymous | 0 | 2 |
| SEC23IP   | chr10 | 121658296/G//A     | nonsynonymous | 0 | 2 |
| DPYSL4    | chr10 | 134006332/G//T     | nonsynonymous | 0 | 2 |
| MRVI1     | chr11 | 10715175/C//T      | synonymous    | 0 | 2 |
| OR8J1     | chr11 | 56128395/A//G      | nonsynonymous | 0 | 2 |
| OR8U8     | chr11 | 56143923/C//A      | nonsynonymous | 0 | 2 |
| NDUFV1    | chr11 | 67376110/G//A      | synonymous    | 0 | 2 |
| GUCY1A2   | chr11 | 106558338/C//T     | synonymous    | 0 | 2 |
| GUCY1A2   | chr11 | 106810562/C//A     | nonsynonymous | 0 | 2 |
| ATM       | chr11 | 108170615/GAGT//G  | synonymous    | 0 | 2 |
| TMEM225   | chr11 | 123755951/C//T     | nonsynonymous | 0 | 2 |
| ABCD2     | chr12 | 40013370/T//A      | nonsynonymous | 0 | 2 |
| COL2A1    | chr12 | 48372442/C//T      | nonsynonymous | 0 | 2 |

|              |       |                 |               |   |   |
|--------------|-------|-----------------|---------------|---|---|
| EIF4B        | chr12 | 53415611/C//T   | nonsynonymous | 0 | 2 |
| LHX5         | chr12 | 113906191/C//T  | nonsynonymous | 0 | 2 |
| MSI1         | chr12 | 120789172/G//A  | synonymous    | 0 | 2 |
| RIMBP2       | chr12 | 130921759/G//A  | synonymous    | 0 | 2 |
| MAB21L1      | chr13 | 36050056/A//C   | nonsynonymous | 0 | 2 |
| NALCN        | chr13 | 101881877/T//C  | nonsynonymous | 0 | 2 |
| KCNH5        | chr14 | 63447858/G//T   | nonsynonymous | 0 | 2 |
| VASH1        | chr14 | 77242499/C//T   | synonymous    | 0 | 2 |
| AQR          | chr15 | 35252994/T//C   | nonsynonymous | 0 | 2 |
| ADAMTSL3     | chr15 | 84582093/C//T   | synonymous    | 0 | 2 |
| PAGR1        | chr16 | 29828254/T//C   | synonymous    | 0 | 2 |
|              | chr16 | 47497822/C//T   | synonymous    | 0 | 2 |
| CNGB1        | chr16 | 57937766/C//G   | nonsynonymous | 0 | 2 |
| CDH13        | chr16 | 83828646/C//T   | synonymous    | 0 | 2 |
| CYBA         | chr16 | 88713185/CAT//C | nonsynonymous | 0 | 2 |
| TUBB3        | chr16 | 90001447/G//A   | synonymous    | 0 | 2 |
| PSMD11       | chr17 | 30781579/G//T   | nonsynonymous | 0 | 2 |
| SMG8         | chr17 | 57289739/A//G   | synonymous    | 0 | 2 |
| CEP295NL     | chr17 | 76887123/T//C   | nonsynonymous | 0 | 2 |
| CTDP1        | chr18 | 77473087/G//A   | nonsynonymous | 0 | 2 |
| PSPN         | chr19 | 6375712/C//A    | nonsynonymous | 0 | 2 |
| OR111        | chr19 | 15198417/C//A   | nonsynonymous | 0 | 2 |
| BORCS8-MEF2B | chr19 | 19256573/G//A   | nonsynonymous | 0 | 2 |
| FXYD5        | chr19 | 35655083/C//T   | nonsynonymous | 0 | 2 |
| LIN37        | chr19 | 36239657/C//A   | nonsynonymous | 0 | 2 |
| CLIP3        | chr19 | 36518084/G//A   | nonsynonymous | 0 | 2 |
| ZNF224       | chr19 | 44612386/G//A   | synonymous    | 0 | 2 |
| ZNF347       | chr19 | 53643536/C//T   | synonymous    | 0 | 2 |
| ZSCAN18      | chr19 | 58598713/G//A   | synonymous    | 0 | 2 |
| BPIFB4       | chr20 | 31671576/C//T   | synonymous    | 0 | 2 |
| BPIFB4       | chr20 | 31680266/G//A   | synonymous    | 0 | 2 |
| PHF21B       | chr22 | 45279020/C//T   | synonymous    | 0 | 2 |
| TUBGCP6      | chr22 | 50658874/G//A   | nonsynonymous | 0 | 2 |
| CTPS2        | chrX  | 16608902/G//T   | synonymous    | 0 | 2 |
| ARX          | chrX  | 25022894/G//A   | nonsynonymous | 0 | 2 |
| WNK3         | chrX  | 54328237/A//T   | nonsynonymous | 0 | 2 |
| POU3F4       | chrX  | 82764336/G//T   | nonsynonymous | 0 | 2 |
| BHLHB9       | chrX  | 102004391/G//A  | synonymous    | 0 | 2 |
| IRS4         | chrX  | 107978988/C//T  | nonsynonymous | 0 | 2 |
| ATP2B3       | chrX  | 152821531/C//T  | nonsynonymous | 0 | 2 |
| GALR1        | chr18 | 74962466/C//T   | synonymous    | 2 | 0 |
| IRF2BP2      | chr1  | 234744250/G//A  | synonymous    | 1 | 1 |
| MROH7        | chr1  | 55144943/G//C   | nonsynonymous | 0 | 2 |
| LRRIQ3       | chr1  | 74507600/C//A   | nonsynonymous | 0 | 2 |
| OLFM3        | chr1  | 102270255/G//T  | synonymous    | 0 | 2 |
| OR10K1       | chr1  | 158435933/C//T  | synonymous    | 0 | 2 |
| BRINP3       | chr1  | 190067310/G//C  | synonymous    | 0 | 2 |
| OR2T33       | chr1  | 248436532/G//A  | synonymous    | 0 | 2 |
| OR2T11       | chr1  | 248789580/G//C  | nonsynonymous | 0 | 2 |
| REV1         | chr2  | 100024506/T//TA | nonsynonymous | 0 | 2 |
| ARPC4-TTLL3  | chr3  | 9839339/A//G    | synonymous    | 0 | 2 |
| RASSF1       | chr3  | 50369518/T//C   | nonsynonymous | 0 | 2 |
| XRN1         | chr3  | 142141670/T//C  | synonymous    | 0 | 2 |
| PPP3CA       | chr4  | 102030182/C//T  | nonsynonymous | 0 | 2 |
| IRX4         | chr5  | 1880923/G//A    | nonsynonymous | 0 | 2 |
| ADAMTS12     | chr5  | 33576343/G//A   | nonsynonymous | 0 | 2 |
| TNIP1        | chr5  | 150436429/C//T  | synonymous    | 0 | 2 |
| SLC17A5      | chr6  | 74304813/C//T   | nonsynonymous | 0 | 2 |
| ARFGEF3      | chr6  | 138655292/T//C  | nonsynonymous | 0 | 2 |
| MIOS         | chr7  | 7625309/A//T    | nonsynonymous | 0 | 2 |
| EGFR         | chr7  | 55266451/T//C   | nonsynonymous | 0 | 2 |
| ZNF736       | chr7  | 63808639/T//G   | nonsynonymous | 0 | 2 |
| ACTR3B       | chr7  | 152549283/G//T  | nonsynonymous | 0 | 2 |
| KIAA1456     | chr8  | 12879282/T//G   | nonsynonymous | 0 | 2 |
| ADAM32       | chr8  | 39103689/A//G   | synonymous    | 0 | 2 |
| OXR1         | chr8  | 107726063/G//T  | nonsynonymous | 0 | 2 |
| NUTM2G       | chr9  | 99697649/G//C   | nonsynonymous | 0 | 2 |
| AIP          | chr11 | 67257620/C//CA  | nonsynonymous | 0 | 2 |
| AMOTL1       | chr11 | 94501548/C//T   | synonymous    | 0 | 2 |
| KMT2D        | chr12 | 49438268/C//G   | nonsynonymous | 0 | 2 |

|            |       |                           |               |   |   |
|------------|-------|---------------------------|---------------|---|---|
| SACS       | chr13 | 23913313/C//G             | nonsynonymous | 0 | 2 |
| SCAPER     | chr15 | 77092661/C//T             | nonsynonymous | 0 | 2 |
| LONP2      | chr16 | 48381552/C//T             | synonymous    | 0 | 2 |
| TP53       | chr17 | 7578492/C//T              | nonsynonymous | 0 | 2 |
| RARA       | chr17 | 38511593/G//A             | nonsynonymous | 0 | 2 |
| RGL3       | chr19 | 11517152/C//G             | synonymous    | 0 | 2 |
| LCA5L      | chr21 | 40777886/G//A             | synonymous    | 0 | 2 |
| DSCAM      | chr21 | 41455850/C//A             | nonsynonymous | 0 | 2 |
| DSCAM      | chr21 | 41455853/C//A             | nonsynonymous | 0 | 2 |
| MAP7D2     | chrX  | 20071036/C//A             | synonymous    | 0 | 2 |
| MAOA       | chrX  | 43587499/TTGTGGTATGTGAAGC | nonsynonymous | 0 | 2 |
| BCAP31     | chrX  | 152988699/T//A            | synonymous    | 0 | 2 |
| ABCD1      | chrX  | 152990727/G//A            | synonymous    | 0 | 2 |
| TIE1       | chr1  | 43770628/C//T             | synonymous    | 0 | 2 |
| DNAJC6     | chr1  | 65867445/A//G             | synonymous    | 0 | 2 |
| CLCA4      | chr1  | 87041231/G//T             | nonsynonymous | 0 | 2 |
| NECTIN4    | chr1  | 161047448/G//C            | synonymous    | 0 | 2 |
| CHRM3      | chr1  | 240071053/C//T            | nonsynonymous | 0 | 2 |
| GREB1      | chr2  | 11706619/C//T             | synonymous    | 0 | 2 |
| DHX57      | chr2  | 39095433/C//T             | nonsynonymous | 0 | 2 |
| CNTNAP5    | chr2  | 125192161/G//T            | nonsynonymous | 0 | 2 |
| FASTKD1    | chr2  | 170411764/C//T            | nonsynonymous | 0 | 2 |
| KLHL40     | chr3  | 42727870/G//A             | nonsynonymous | 0 | 2 |
| ITIH4      | chr3  | 52861129/TCC//T           | nonsynonymous | 0 | 2 |
| ABLIM2     | chr4  | 8108336/C//T              | synonymous    | 0 | 2 |
| DCHS2      | chr4  | 155219414/G//A            | nonsynonymous | 0 | 2 |
| DNAH5      | chr5  | 13737379/G//A             | nonsynonymous | 0 | 2 |
| PCDHA6     | chr5  | 140208144/C//T            | synonymous    | 0 | 2 |
| PCDHA10    | chr5  | 140236992/G//A            | synonymous    | 0 | 2 |
| PCDHGA2    | chr5  | 140718683/G//A            | nonsynonymous | 0 | 2 |
| OR2Y1      | chr5  | 180166600/G//A            | synonymous    | 0 | 2 |
| IP6K3      | chr6  | 33694691/G//A             | synonymous    | 0 | 2 |
| MYB        | chr6  | 135511445/G//A            | nonsynonymous | 0 | 2 |
| SCAF8      | chr6  | 155116245/A//T            | nonsynonymous | 0 | 2 |
| TIAM2      | chr6  | 155500543/A//G            | nonsynonymous | 0 | 2 |
| RNASET2    | chr6  | 167343147/C//T            | nonsynonymous | 0 | 2 |
| TNRC18     | chr7  | 5430246/C//A              | synonymous    | 0 | 2 |
| NPC1L1     | chr7  | 44560710/C//T             | synonymous    | 0 | 2 |
| SLC26A4    | chr7  | 107314635/G//A            | nonsynonymous | 0 | 2 |
| PTPRZ1     | chr7  | 121651353/G//A            | synonymous    | 0 | 2 |
| NUGGC      | chr8  | 27888854/G//A             | nonsynonymous | 0 | 2 |
| KCNB2      | chr8  | 73480323/G//A             | synonymous    | 0 | 2 |
| KCNS2      | chr8  | 99441272/C//T             | synonymous    | 0 | 2 |
| TOPORS-AS1 | chr9  | 32552391/C//T             | synonymous    | 0 | 2 |
| OR2K2      | chr9  | 114090031/G//T            | nonsynonymous | 0 | 2 |
| AKR1C3     | chr10 | 5136635/G//A              | synonymous    | 0 | 2 |
| HOGA1      | chr10 | 99371385/G//A             | nonsynonymous | 0 | 2 |
| NRAP       | chr10 | 115365628/C//T            | nonsynonymous | 0 | 2 |
| DOCK1      | chr10 | 129207588/T//G            | nonsynonymous | 0 | 2 |
| SLC17A6    | chr11 | 22363157/C//T             | nonsynonymous | 0 | 2 |
| BRCA2      | chr13 | 32910728/G//T             | nonsynonymous | 0 | 2 |
| TDRD3      | chr13 | 61057927/A//G             | nonsynonymous | 0 | 2 |
| ELMSAN1    | chr14 | 74206008/G//A             | nonsynonymous | 0 | 2 |
| ZNF609     | chr15 | 64792307/C//T             | nonsynonymous | 0 | 2 |
| SIN3A      | chr15 | 75688801/GGATTGTTGCCA//G  | nonsynonymous | 0 | 2 |
| NGRN       | chr15 | 90814937/G//T             | nonsynonymous | 0 | 2 |
| SALL1      | chr16 | 51175457/C//T             | nonsynonymous | 0 | 2 |
| ADAD2      | chr16 | 84230315/C//T             | nonsynonymous | 0 | 2 |
| ARID3A     | chr19 | 932570/C//G               | nonsynonymous | 0 | 2 |
| MUC16      | chr19 | 9067143/G//A              | nonsynonymous | 0 | 2 |
| HAMP       | chr19 | 35775942/G//A             | synonymous    | 0 | 2 |
| CEACAM21   | chr19 | 42085829/G//A             | nonsynonymous | 0 | 2 |
| CDH4       | chr20 | 60348080/G//A             | nonsynonymous | 0 | 2 |
| XKR3       | chr22 | 17265164/C//T             | nonsynonymous | 0 | 2 |
| NHS        | chrX  | 17750068/C//T             | synonymous    | 0 | 2 |
| POLA1      | chrX  | 24833182/A//G             | nonsynonymous | 0 | 2 |
| TSPYL2     | chrX  | 53115441/G//A             | nonsynonymous | 0 | 2 |
| ACTRT1     | chrX  | 127186075/G//A            | synonymous    | 0 | 2 |
| ARHGAP4    | chrX  | 153175255/C//T            | nonsynonymous | 0 | 2 |
| RCC2       | chr1  | 17742976/C//T             | synonymous    | 0 | 2 |

|             |       |                         |               |   |   |
|-------------|-------|-------------------------|---------------|---|---|
| WNT4        | chr1  | 22446647/C//T           | nonsynonymous | 0 | 2 |
| DAB1        | chr1  | 57480729/G//A           | nonsynonymous | 0 | 2 |
| TSPAN2      | chr1  | 115615583/C//T          | nonsynonymous | 0 | 2 |
| CHRM3       | chr1  | 240071655/C//T          | nonsynonymous | 0 | 2 |
| DDX1        | chr2  | 15767213/TG//T          | nonsynonymous | 0 | 2 |
| RAD51AP2    | chr2  | 17696607/G//A           | nonsynonymous | 0 | 2 |
| EHD3        | chr2  | 31489172/C//T           | nonsynonymous | 0 | 2 |
| LRP1B       | chr2  | 141460055/T//C          | nonsynonymous | 0 | 2 |
| SPATA3      | chr2  | 231860926/C//T          | synonymous    | 0 | 2 |
| ARPC4-TTLL3 | chr3  | 9854657/T//A            | nonsynonymous | 0 | 2 |
| ZNF35       | chr3  | 44700929/G//A           | synonymous    | 0 | 2 |
| CELSR3      | chr3  | 48691065/G//A           | nonsynonymous | 0 | 2 |
| USP19       | chr3  | 49147889/G//A           | nonsynonymous | 0 | 2 |
| ZBED2       | chr3  | 111313039/G//A          | nonsynonymous | 0 | 2 |
| DCHS2       | chr4  | 155160409/G//A          | synonymous    | 0 | 2 |
| SLC1A3      | chr5  | 36684074/G//A           | synonymous    | 0 | 2 |
| PLCXD3      | chr5  | 41382421/C//T           | nonsynonymous | 0 | 2 |
| APC         | chr5  | 112175513/G//T          | nonsynonymous | 0 | 2 |
| KCTD16      | chr5  | 143853471/C//T          | nonsynonymous | 0 | 2 |
| PEX6        | chr6  | 42934337/G//A           | nonsynonymous | 0 | 2 |
| IGF2BP3     | chr7  | 23390960/G//A           | nonsynonymous | 0 | 2 |
| PIK3CG      | chr7  | 106508556/C//T          | nonsynonymous | 0 | 2 |
| CLCN1       | chr7  | 143013285/C//T          | synonymous    | 0 | 2 |
| RP1         | chr8  | 55542638/G//A           | nonsynonymous | 0 | 2 |
| PLPP7       | chr9  | 134165701/G//A          | nonsynonymous | 0 | 2 |
| ARMC4       | chr10 | 28276429/G//A           | nonsynonymous | 0 | 2 |
| OGDHL       | chr10 | 50966551/G//A           | nonsynonymous | 0 | 2 |
| SORCS3      | chr10 | 106849589/C//T          | nonsynonymous | 0 | 2 |
| VEGFB       | chr11 | 64003379/ACAGCTGGTGCCAG | nonsynonymous | 0 | 2 |
| TRMT112     | chr11 | 64084783/T//TACGCGCC    | nonsynonymous | 0 | 2 |
| TAS2R8      | chr12 | 10959421/G//A           | synonymous    | 0 | 2 |
| GAS2L3      | chr12 | 101017610/A//G          | nonsynonymous | 0 | 2 |
| PXN         | chr12 | 120651777/G//A          | synonymous    | 0 | 2 |
| DCLK1       | chr13 | 36700265/C//T           | nonsynonymous | 0 | 2 |
| SLITRK5     | chr13 | 88329424/C//T           | nonsynonymous | 0 | 2 |
| DOCK9       | chr13 | 99461718/CT//C          | nonsynonymous | 0 | 2 |
| FLRT2       | chr14 | 86088894/C//T           | nonsynonymous | 0 | 2 |
| PPP4R4      | chr14 | 94696962/G//A           | synonymous    | 0 | 2 |
| ZNF106      | chr15 | 42710039/G//A           | synonymous    | 0 | 2 |
|             | chr15 | 74327359/G//A           | synonymous    | 0 | 2 |
| HBA1        | chr16 | 227320/C//T             | synonymous    | 0 | 2 |
| BAIAP3      | chr16 | 1391404/C//T            | synonymous    | 0 | 2 |
| TIMM22      | chr17 | 900411/G//A             | nonsynonymous | 0 | 2 |
| TP53        | chr17 | 7577069/CG//C           | nonsynonymous | 0 | 2 |
| PRKCA       | chr17 | 64728922/G//T           | nonsynonymous | 0 | 2 |
| ABCA8       | chr17 | 66914238/C//T           | nonsynonymous | 0 | 2 |
| CDR2L       | chr17 | 73000280/C//T           | synonymous    | 0 | 2 |
| MGAT5B      | chr17 | 74922813/G//A           | nonsynonymous | 0 | 2 |
| SCGB2B2     | chr19 | 35085245/G//A           | synonymous    | 0 | 2 |
| SPTBN4      | chr19 | 41077993/C//T           | nonsynonymous | 0 | 2 |
| TMEM86B     | chr19 | 55738428/G//A           | synonymous    | 0 | 2 |
| NLRP8       | chr19 | 56465927/C//T           | nonsynonymous | 0 | 2 |
| PRAMEF4     | chr1  | 12941754/A//G           | nonsynonymous | 0 | 2 |
| PODN        | chr1  | 53544159/C//T           | nonsynonymous | 0 | 2 |
| SEC16B      | chr1  | 177930821/G//C          | nonsynonymous | 0 | 2 |
| LYST        | chr1  | 235969126/G//A          | nonsynonymous | 0 | 2 |
| RYR2        | chr1  | 237670101/G//A          | nonsynonymous | 0 | 2 |
| GCKR        | chr2  | 27728609/C//T           | nonsynonymous | 0 | 2 |
| DPP4        | chr2  | 162873630/C//T          | nonsynonymous | 0 | 2 |
| CCDC150     | chr2  | 197597272/G//A          | nonsynonymous | 0 | 2 |
| IGFBP2      | chr2  | 217525370/G//A          | nonsynonymous | 0 | 2 |
| DOCK10      | chr2  | 225714255/T//A          | nonsynonymous | 0 | 2 |
| SEPT2       | chr2  | 242263652/C//A          | nonsynonymous | 0 | 2 |
| RTP5        | chr2  | 242815307/C//T          | nonsynonymous | 0 | 2 |
| LZTFL1      | chr3  | 45870094/G//A           | nonsynonymous | 0 | 2 |
| ALCAM       | chr3  | 105260478/G//A          | nonsynonymous | 0 | 2 |
| PIK3CA      | chr3  | 178916943/AAAG//A       | nonsynonymous | 0 | 2 |
| PIK3CA      | chr3  | 178916948/T//G          | nonsynonymous | 0 | 2 |
| ANK2        | chr4  | 114279509/C//T          | synonymous    | 0 | 2 |
| ADGRV1      | chr5  | 89921058/G//A           | nonsynonymous | 0 | 2 |

|          |       |                  |               |   |   |
|----------|-------|------------------|---------------|---|---|
| APC      | chr5  | 112173992/C//T   | nonsynonymous | 0 | 2 |
| APC      | chr5  | 112175675/A//AAG | nonsynonymous | 0 | 2 |
| JAKMIP2  | chr5  | 147040637/G//A   | synonymous    | 0 | 2 |
| LARP1    | chr5  | 154193795/A//G   | synonymous    | 0 | 2 |
| GRM6     | chr5  | 178408783/C//T   | nonsynonymous | 0 | 2 |
| MRNIP    | chr5  | 179264799/C//T   | synonymous    | 0 | 2 |
| HLA-DMB  | chr6  | 32904946/T//TA   | nonsynonymous | 0 | 2 |
| HLA-DPA1 | chr6  | 33037006/T//C    | nonsynonymous | 0 | 2 |
| MUT      | chr6  | 49403271/G//T    | synonymous    | 0 | 2 |
| FLNC     | chr7  | 128490982/G//A   | nonsynonymous | 0 | 2 |
| TNKS     | chr8  | 9634257/C//G     | synonymous    | 0 | 2 |
| DOK2     | chr8  | 21771059/C//T    | synonymous    | 0 | 2 |
| CA8      | chr8  | 61192305/C//T    | nonsynonymous | 0 | 2 |
| ZFHx4    | chr8  | 77617228/G//A    | nonsynonymous | 0 | 2 |
| FRMPD1   | chr9  | 37744862/C//T    | nonsynonymous | 0 | 2 |
| OMD      | chr9  | 95177734/A//G    | synonymous    | 0 | 2 |
| EXD3     | chr9  | 140218211/C//T   | nonsynonymous | 0 | 2 |
| SFMBT2   | chr10 | 7214536/C//T     | nonsynonymous | 0 | 2 |
| PSD      | chr10 | 104176766/C//T   | synonymous    | 0 | 2 |
| ELP4     | chr11 | 31805046/G//A    | nonsynonymous | 0 | 2 |
| TUBGCP3  | chr13 | 113174192/C//T   | synonymous    | 0 | 2 |
| AHNAK2   | chr14 | 105418127/C//T   | nonsynonymous | 0 | 2 |
| AHNAK2   | chr14 | 105418134/A//G   | synonymous    | 0 | 2 |
| AQP9     | chr15 | 58467155/G//A    | nonsynonymous | 0 | 2 |
| THSD4    | chr15 | 72050263/G//C    | nonsynonymous | 0 | 2 |
| GLYR1    | chr16 | 4895119/G//A     | synonymous    | 0 | 2 |
| SLC13A2  | chr17 | 26800818/C//T    | nonsynonymous | 0 | 2 |
| JUP      | chr17 | 39927915/C//T    | synonymous    | 0 | 2 |
| ZNF407   | chr18 | 72347541/A//G    | synonymous    | 0 | 2 |
| STAP2    | chr19 | 4328719/C//A     | synonymous    | 0 | 2 |
| MUC16    | chr19 | 9074840/C//A     | nonsynonymous | 0 | 2 |
| PODNL1   | chr19 | 14044066/C//T    | nonsynonymous | 0 | 2 |
| CYP4F2   | chr19 | 16008282/C//T    | nonsynonymous | 0 | 2 |
| RASGRP4  | chr19 | 38903659/G//A    | nonsynonymous | 0 | 2 |
| TRPM4    | chr19 | 49686029/C//A    | synonymous    | 0 | 2 |
| CPXM1    | chr20 | 2775076/C//T     | synonymous    | 0 | 2 |
| CDH4     | chr20 | 60503249/G//T    | synonymous    | 0 | 2 |
| COL18A1  | chr21 | 46876032/C//A    | synonymous    | 0 | 2 |
| COL6A2   | chr21 | 47551899/C//T    | synonymous    | 0 | 2 |
| OTC      | chrX  | 38240676/C//T    | nonsynonymous | 0 | 2 |
| SLC38A5  | chrX  | 48317972/G//A    | nonsynonymous | 0 | 2 |
| WNK3     | chrX  | 54275461/T//C    | nonsynonymous | 0 | 2 |
| AMER1    | chrX  | 63412110/G//A    | nonsynonymous | 0 | 2 |
| TKTL1    | chrX  | 153539304/C//T   | synonymous    | 0 | 2 |
| CD1B     | chr1  | 158300741/C//A   | nonsynonymous | 0 | 2 |
| LAMC1    | chr1  | 183072705/G//T   | nonsynonymous | 0 | 2 |
| NID1     | chr1  | 236205338/C//T   | nonsynonymous | 0 | 2 |
| MYT1L    | chr2  | 1914021/C//T     | nonsynonymous | 0 | 2 |
| FN1      | chr2  | 216252994/C//T   | nonsynonymous | 0 | 2 |
| TNP1     | chr2  | 217724626/G//A   | synonymous    | 0 | 2 |
| VIPR1    | chr3  | 42577836/G//A    | synonymous    | 0 | 2 |
| DCBLD2   | chr3  | 98531213/C//T    | nonsynonymous | 0 | 2 |
| KALRN    | chr3  | 124053186/G//A   | synonymous    | 0 | 2 |
| FRYL     | chr4  | 48597670/T//C    | nonsynonymous | 0 | 2 |
| FAT4     | chr4  | 126328050/G//A   | nonsynonymous | 0 | 2 |
| F2R      | chr5  | 76028624/CTCA//C | nonsynonymous | 0 | 2 |
| PCDHGB5  | chr5  | 140779518/C//T   | synonymous    | 0 | 2 |
| JARID2   | chr6  | 15497178/C//A    | synonymous    | 0 | 2 |
| ZSCAN9   | chr6  | 28200820/G//A    | nonsynonymous | 0 | 2 |
| DPCR1    | chr6  | 30916512/C//T    | nonsynonymous | 0 | 2 |
| ANK1     | chr8  | 41577302/G//A    | synonymous    | 0 | 2 |
| DENND4C  | chr9  | 19346630/A//T    | nonsynonymous | 0 | 2 |
| PAPPA    | chr9  | 119129992/G//A   | nonsynonymous | 0 | 2 |
| MKX      | chr10 | 28024186/G//A    | nonsynonymous | 0 | 2 |
| CDH23    | chr10 | 73567093/C//T    | synonymous    | 0 | 2 |
| SORCS1   | chr10 | 108337060/C//G   | synonymous    | 0 | 2 |
| CFAP46   | chr10 | 134726304/G//A   | nonsynonymous | 0 | 2 |
| CYP2R1   | chr11 | 14913646/G//A    | nonsynonymous | 0 | 2 |
| MRGPRX1  | chr11 | 18955931/C//T    | nonsynonymous | 0 | 2 |
| OR5AP2   | chr11 | 56409905/A//G    | nonsynonymous | 0 | 2 |

|            |       |                  |               |   |   |
|------------|-------|------------------|---------------|---|---|
| LPCAT3     | chr12 | 7092651/G//T     | synonymous    | 0 | 2 |
| AICDA      | chr12 | 8758007/G//A     | synonymous    | 0 | 2 |
| RAB3IP     | chr12 | 70150317/C//T    | synonymous    | 0 | 2 |
| TMEM119    | chr12 | 108986148/C//T   | synonymous    | 0 | 2 |
| PDX1       | chr13 | 28494180/G//A    | synonymous    | 0 | 2 |
| VWA8       | chr13 | 42303699/C//A    | nonsynonymous | 0 | 2 |
| PCDH9      | chr13 | 67801376/C//A    | synonymous    | 0 | 2 |
| SEEL       | chr13 | 78211272/G//T    | nonsynonymous | 0 | 2 |
| PTPN21     | chr14 | 88936292/T//G    | nonsynonymous | 0 | 2 |
| CIITA      | chr16 | 11016291/C//T    | synonymous    | 0 | 2 |
| SALL1      | chr16 | 51171083/G//A    | synonymous    | 0 | 2 |
| TP53       | chr17 | 7577569/A//C     | nonsynonymous | 0 | 2 |
| BCAS3      | chr17 | 59001836/G//A    | synonymous    | 0 | 2 |
| AXIN2      | chr17 | 63554549/C//T    | nonsynonymous | 0 | 2 |
| RNF213     | chr17 | 78319853/C//T    | nonsynonymous | 0 | 2 |
| ZNF532     | chr18 | 56586308/G//A    | synonymous    | 0 | 2 |
| ZNF792     | chr19 | 35449593/G//A    | nonsynonymous | 0 | 2 |
| DMKN       | chr19 | 36000827/C//T    | nonsynonymous | 0 | 2 |
| CYP2A7     | chr19 | 41384824/A//G    | synonymous    | 0 | 2 |
| TRPM4      | chr19 | 49692259/C//T    | nonsynonymous | 0 | 2 |
| ZIM2       | chr19 | 57286602/G//A    | synonymous    | 0 | 2 |
| ZCCHC3     | chr20 | 278500/G//T      | synonymous    | 0 | 2 |
| ATRN       | chr20 | 3528079/C//T     | nonsynonymous | 0 | 2 |
| NCOA6      | chr20 | 33303070/T//G    | synonymous    | 0 | 2 |
| CECR2      | chr22 | 18022564/G//A    | nonsynonymous | 0 | 2 |
| DGCR8      | chr22 | 20074043/A//C    | nonsynonymous | 0 | 2 |
| TTC28      | chr22 | 28378157/C//T    | synonymous    | 0 | 2 |
| SHROOM2    | chrX  | 9863363/G//A     | nonsynonymous | 0 | 2 |
| MBTPS2     | chrX  | 21869659/G//T    | synonymous    | 0 | 2 |
| TAF1       | chrX  | 70602614/A//G    | nonsynonymous | 0 | 2 |
|            | chr1  | 215179191/C//T   | synonymous    | 0 | 2 |
| ZFP36L2    | chr2  | 43452649/G//A    | synonymous    | 0 | 2 |
| ADAM23     | chr2  | 207457443/C//T   | synonymous    | 0 | 2 |
| MTMR14     | chr3  | 9743627/A//G     | synonymous    | 0 | 2 |
| ZIC4       | chr3  | 147108775/T//C   | nonsynonymous | 0 | 2 |
| FAT4       | chr4  | 126373546/G//A   | nonsynonymous | 0 | 2 |
| APC        | chr5  | 112175675/AAG//A | nonsynonymous | 0 | 2 |
| ZNF862     | chr7  | 149558454/C//T   | synonymous    | 0 | 2 |
| RBM33      | chr7  | 155538160/G//A   | nonsynonymous | 0 | 2 |
| LOXL2      | chr8  | 23225607/G//A    | synonymous    | 0 | 2 |
| TAF1L      | chr9  | 32634655/T//G    | nonsynonymous | 0 | 2 |
| ABCA1      | chr9  | 107583748/G//A   | synonymous    | 0 | 2 |
| C1RL       | chr12 | 7261801/C//A     | synonymous    | 0 | 2 |
| ZKSCAN2    | chr16 | 25251416/G//A    | synonymous    | 0 | 2 |
| ARHGAP23   | chr17 | 36622816/C//T    | nonsynonymous | 0 | 2 |
| KCNH4      | chr17 | 40318419/G//A    | nonsynonymous | 0 | 2 |
| RGS9       | chr17 | 63200383/C//T    | synonymous    | 0 | 2 |
| CACNG5     | chr17 | 64880644/G//A    | nonsynonymous | 0 | 2 |
| DNAH17     | chr17 | 76455195/C//T    | nonsynonymous | 0 | 2 |
| ZNF99      | chr19 | 22940177/G//T    | nonsynonymous | 0 | 2 |
| KRTAP10-10 | chr21 | 46057676/C//A    | nonsynonymous | 0 | 2 |
| MAGEB2     | chrX  | 30237623/A//C    | nonsynonymous | 0 | 2 |
| RP1        | chr8  | 55534012/C//T    | synonymous    | 1 | 1 |
| TMEM201    | chr1  | 9655960/G//A     | synonymous    | 0 | 2 |
| SPTA1      | chr1  | 158615044/C//G   | nonsynonymous | 0 | 2 |
| TNR        | chr1  | 175304930/C//T   | nonsynonymous | 0 | 2 |
| CEP170     | chr1  | 243289612/A//C   | synonymous    | 0 | 2 |
| C1orf100   | chr1  | 244538768/A//T   | nonsynonymous | 0 | 2 |
| ZNF385B    | chr2  | 180383268/C//T   | nonsynonymous | 0 | 2 |
| MARCH4     | chr2  | 217234856/C//T   | nonsynonymous | 0 | 2 |
| ARPC2      | chr2  | 219118734/T//C   | synonymous    | 0 | 2 |
| OBSL1      | chr2  | 220432668/G//A   | nonsynonymous | 0 | 2 |
| TOPAZ1     | chr3  | 44286486/C//T    | nonsynonymous | 0 | 2 |
| CACNA2D2   | chr3  | 50417431/C//T    | synonymous    | 0 | 2 |
| TRIM59     | chr3  | 160156557/A//T   | nonsynonymous | 0 | 2 |
| CCKAR      | chr4  | 26490886/G//A    | synonymous    | 0 | 2 |
| ADAMTS3    | chr4  | 73181644/A//G    | synonymous    | 0 | 2 |
| SPATA5     | chr4  | 124235157/C//A   | nonsynonymous | 0 | 2 |
| KIAA0825   | chr5  | 93732217/G//T    | synonymous    | 0 | 2 |
| APC        | chr5  | 112128209/C//T   | nonsynonymous | 0 | 2 |

|                |       |                |               |   |   |
|----------------|-------|----------------|---------------|---|---|
| FBN2           | chr5  | 127873312/C//T | synonymous    | 0 | 2 |
| PCDHA6         | chr5  | 140207808/C//T | synonymous    | 0 | 2 |
| GLRA1          | chr5  | 151202502/C//T | nonsynonymous | 0 | 2 |
| ZBED9          | chr6  | 28554306/T//C  | synonymous    | 0 | 2 |
| GLTSCR1L       | chr6  | 42832599/C//T  | synonymous    | 0 | 2 |
| SYNE1          | chr6  | 152469354/C//T | nonsynonymous | 0 | 2 |
| PDE10A         | chr6  | 165848745/G//T | nonsynonymous | 0 | 2 |
| VSTM2A         | chr7  | 54612486/C//T  | synonymous    | 0 | 2 |
| ARF5           | chr7  | 127230160/T//A | nonsynonymous | 0 | 2 |
| EPHB6          | chr7  | 142561718/C//A | synonymous    | 0 | 2 |
| SSPO           | chr7  | 149512311/G//A | nonsynonymous | 0 | 2 |
| RHOBTB2        | chr8  | 22864364/C//T  | synonymous    | 0 | 2 |
| ZFHX4          | chr8  | 77767937/C//T  | nonsynonymous | 0 | 2 |
| MSANTD3-TMEFF1 | chr9  | 103338824/G//A | nonsynonymous | 0 | 2 |
| ACTL7B         | chr9  | 111617947/G//A | synonymous    | 0 | 2 |
| CERCAM         | chr9  | 131186866/G//A | nonsynonymous | 0 | 2 |
| SFMBT2         | chr10 | 7214470/G//A   | nonsynonymous | 0 | 2 |
| SLF2           | chr10 | 102709849/G//A | nonsynonymous | 0 | 2 |
| TCF7L2         | chr10 | 114905777/C//T | nonsynonymous | 0 | 2 |
| TRIM66         | chr11 | 8643339/G//A   | synonymous    | 0 | 2 |
| SPON1          | chr11 | 14156968/C//T  | nonsynonymous | 0 | 2 |
| ALX4           | chr11 | 44289129/C//T  | nonsynonymous | 0 | 2 |
| FMNL3          | chr12 | 50100886/C//T  | nonsynonymous | 0 | 2 |
| PTPRR          | chr12 | 71286509/C//G  | nonsynonymous | 0 | 2 |
| PTPRQ          | chr12 | 80878331/G//T  | nonsynonymous | 0 | 2 |
| PITPNM2        | chr12 | 123489914/G//A | synonymous    | 0 | 2 |
| B3GLCT         | chr13 | 31858802/A//G  | nonsynonymous | 0 | 2 |
| DCLK1          | chr13 | 36445444/T//G  | nonsynonymous | 0 | 2 |
| SMAD9          | chr13 | 37441502/G//A  | nonsynonymous | 0 | 2 |
| FAM124A        | chr13 | 51825615/G//A  | nonsynonymous | 0 | 2 |
| TMEM121        | chr14 | 105995821/A//G | nonsynonymous | 0 | 2 |
|                | chr15 | 60907163/A//T  | synonymous    | 0 | 2 |
| NUBP2          | chr16 | 1838575/G//A   | nonsynonymous | 0 | 2 |
| ABCA3          | chr16 | 2327601/C//T   | synonymous    | 0 | 2 |
| MEFV           | chr16 | 3306490/A//G   | nonsynonymous | 0 | 2 |
| ERCC4          | chr16 | 14014102/T//G  | nonsynonymous | 0 | 2 |
| PDILT          | chr16 | 20380898/G//A  | synonymous    | 0 | 2 |
| ZNF646         | chr16 | 31090868/C//G  | nonsynonymous | 0 | 2 |
| DHODH          | chr16 | 72046000/G//A  | nonsynonymous | 0 | 2 |
| PLCG2          | chr16 | 81939006/A//G  | nonsynonymous | 0 | 2 |
| TP53           | chr17 | 7579311/C//T   | nonsynonymous | 0 | 2 |
| CDK12          | chr17 | 37649018/G//A  | nonsynonymous | 0 | 2 |
| TBKBP1         | chr17 | 45776807/C//T  | synonymous    | 0 | 2 |
| APCDD1         | chr18 | 10485553/G//A  | nonsynonymous | 0 | 2 |
| ANKRD30B       | chr18 | 14754979/G//T  | nonsynonymous | 0 | 2 |
| SMAD4          | chr18 | 48604665/G//A  | nonsynonymous | 0 | 2 |
| MKNK2          | chr19 | 2041097/C//T   | nonsynonymous | 0 | 2 |
| EEF2           | chr19 | 3977881/C//T   | nonsynonymous | 0 | 2 |
| PNPLA6         | chr19 | 7600405/T//A   | synonymous    | 0 | 2 |
| FCGBP          | chr19 | 40434049/C//A  | nonsynonymous | 0 | 2 |
| C5AR1          | chr19 | 47823623/C//T  | nonsynonymous | 0 | 2 |
| PCSK2          | chr20 | 17462728/G//A  | synonymous    | 0 | 2 |
| KCNS1          | chr20 | 43727125/G//A  | synonymous    | 0 | 2 |
|                | chr20 | 44036908/A//T  | synonymous    | 0 | 2 |
| HELZ2          | chr20 | 62196629/C//T  | synonymous    | 0 | 2 |
| BCOR           | chrX  | 39933535/G//A  | nonsynonymous | 0 | 2 |
| FUNDC1         | chrX  | 44397786/C//T  | nonsynonymous | 0 | 2 |
| BMP15          | chrX  | 50654046/G//T  | nonsynonymous | 0 | 2 |
| EFNB1          | chrX  | 68058522/G//C  | nonsynonymous | 0 | 2 |
| BEX4           | chrX  | 102471104/C//T | nonsynonymous | 0 | 2 |
| FAM122C        | chrX  | 133988149/G//A | synonymous    | 0 | 2 |
| INTS6L         | chrX  | 134679422/C//A | synonymous    | 0 | 2 |
| BRS3           | chrX  | 135572359/G//T | nonsynonymous | 0 | 2 |
| HSD3B1         | chr1  | 120056807/G//T | nonsynonymous | 0 | 2 |
| DCST2          | chr1  | 155003693/C//T | nonsynonymous | 0 | 2 |
| TNR            | chr1  | 175304903/C//T | nonsynonymous | 0 | 2 |
| PAPPA2         | chr1  | 176564216/G//A | synonymous    | 0 | 2 |
| KIAA1614       | chr1  | 180885999/C//A | nonsynonymous | 0 | 2 |
| ASPM           | chr1  | 197108983/G//T | nonsynonymous | 0 | 2 |
| RRP15          | chr1  | 218478377/A//C | nonsynonymous | 0 | 2 |



|              |       |                           |               |   |   |
|--------------|-------|---------------------------|---------------|---|---|
| RAD51AP2     | chr2  | 17698997/G//A             | nonsynonymous | 0 | 2 |
| WDR33        | chr2  | 128463863/T//C            | synonymous    | 0 | 2 |
| ITGB6        | chr2  | 160982890/C//T            | nonsynonymous | 0 | 2 |
| MTTP         | chr4  | 100543904/G//A            | nonsynonymous | 0 | 2 |
| PCDH10       | chr4  | 134072359/C//T            | nonsynonymous | 0 | 2 |
| MARCH1       | chr4  | 164775228/GTGT//G         | nonsynonymous | 0 | 2 |
| CFAP97       | chr4  | 186111386/T//C            | nonsynonymous | 0 | 2 |
| F2R          | chr5  | 76028964/G//T             | nonsynonymous | 0 | 2 |
| PRR7         | chr5  | 176881943/C//T            | synonymous    | 0 | 2 |
| HIVEP1       | chr6  | 12125319/G//A             | nonsynonymous | 0 | 2 |
| VAR5         | chr6  | 31750907/G//A             | synonymous    | 0 | 2 |
| WDR46        | chr6  | 33248649/G//A             | nonsynonymous | 0 | 2 |
| ZBTB9        | chr6  | 33424049/G//A             | nonsynonymous | 0 | 2 |
| AKAP12       | chr6  | 151672878/GAAAGCTTTGAA//G | nonsynonymous | 0 | 2 |
| SDK1         | chr7  | 4247868/C//T              | synonymous    | 0 | 2 |
| TBX20        | chr7  | 35289718/C//T             | synonymous    | 0 | 2 |
| COPG2        | chr7  | 130298471/G//A            | nonsynonymous | 0 | 2 |
| OR6V1        | chr7  | 142749857/C//A            | synonymous    | 0 | 2 |
| KCNH2        | chr7  | 150655559/G//A            | synonymous    | 0 | 2 |
| FAM92A       | chr8  | 94722048/G//A             | nonsynonymous | 0 | 2 |
| KCNQ3        | chr8  | 133182600/C//T            | nonsynonymous | 0 | 2 |
| MAF1         | chr8  | 145161524/C//G            | nonsynonymous | 0 | 2 |
| MAF1         | chr8  | 145162048/C//A            | synonymous    | 0 | 2 |
| KANK1        | chr9  | 711574/G//A               | nonsynonymous | 0 | 2 |
| C9orf57      | chr9  | 74675503/G//A             | synonymous    | 0 | 2 |
| COL5A1       | chr9  | 137716468/A//T            | nonsynonymous | 0 | 2 |
| FCN1         | chr9  | 137801580/C//T            | synonymous    | 0 | 2 |
| CH17-360D5.1 | chr10 | 47086894/C//T             | synonymous    | 0 | 2 |
| RTKN2        | chr10 | 63958157/T//G             | nonsynonymous | 0 | 2 |
| CCDC73       | chr11 | 32739646/C//T             | synonymous    | 0 | 2 |
| OR5A2        | chr11 | 59189643/G//A             | nonsynonymous | 0 | 2 |
| MMP13        | chr11 | 102826158/C//A            | nonsynonymous | 0 | 2 |
| FXYD6-FXYD2  | chr11 | 117713494/C//T            | synonymous    | 0 | 2 |
| MCAM         | chr11 | 119182271/C//T            | nonsynonymous | 0 | 2 |
| ARID2        | chr12 | 46243962/C//T             | nonsynonymous | 0 | 2 |
| RBMS2        | chr12 | 56962768/G//T             | nonsynonymous | 0 | 2 |
| MVK          | chr12 | 110029088/A//G            | nonsynonymous | 0 | 2 |
| NBEA         | chr13 | 35806753/G//T             | nonsynonymous | 0 | 2 |
|              | chr13 | 36424850/G//T             | synonymous    | 0 | 2 |
| CARMIL3      | chr14 | 24523913/T//C             | synonymous    | 0 | 2 |
|              | chr14 | 59003744/G//C             | synonymous    | 0 | 2 |
| CATSPERB     | chr14 | 92171041/C//T             | synonymous    | 0 | 2 |
| CLCN7        | chr16 | 1499026/C//T              | nonsynonymous | 0 | 2 |
| SLC5A11      | chr16 | 24886984/G//A             | nonsynonymous | 0 | 2 |
| ORC6         | chr16 | 46731661/G//A             | synonymous    | 0 | 2 |
| DNAH2        | chr17 | 7736020/T//A              | nonsynonymous | 0 | 2 |
| NCOR1        | chr17 | 16042434/G//A             | nonsynonymous | 0 | 2 |
| KLHL11       | chr17 | 40021672/T//G             | synonymous    | 0 | 2 |
| PLEKHM1      | chr17 | 43531376/C//T             | synonymous    | 0 | 2 |
| TNRC6C       | chr17 | 76045127/G//C             | synonymous    | 0 | 2 |
| CCDC40       | chr17 | 78055379/G//A             | nonsynonymous | 0 | 2 |
| DUS1L        | chr17 | 80015934/T//G             | synonymous    | 0 | 2 |
| SS18         | chr18 | 23619415/T//C             | nonsynonymous | 0 | 2 |
| ELP2         | chr18 | 33709951/C//T             | nonsynonymous | 0 | 2 |
| CASP14       | chr19 | 15166913/C//A             | synonymous    | 0 | 2 |
| CCDC97       | chr19 | 41822462/C//T             | nonsynonymous | 0 | 2 |
| IRGC         | chr19 | 44222974/C//T             | synonymous    | 0 | 2 |
| A1BG         | chr19 | 58861785/C//T             | synonymous    | 0 | 2 |
| SNTA1        | chr20 | 32000520/G//A             | nonsynonymous | 0 | 2 |
| LAMA5        | chr20 | 60909319/C//T             | nonsynonymous | 0 | 2 |
| MAGEB18      | chrX  | 26157931/G//A             | nonsynonymous | 0 | 2 |
| TBX22        | chrX  | 79281262/G//T             | nonsynonymous | 0 | 2 |
| BRWD3        | chrX  | 79955473/T//C             | nonsynonymous | 0 | 2 |
| PLEKHN1      | chr1  | 908308/C//T               | nonsynonymous | 0 | 2 |
| KCND3        | chr1  | 112524471/C//T            | nonsynonymous | 0 | 2 |
| RPRD2        | chr1  | 150443408/G//A            | nonsynonymous | 0 | 2 |
| ADAMTSL4     | chr1  | 150529979/G//A            | nonsynonymous | 0 | 2 |
| LRRCS2       | chr1  | 165532892/C//T            | nonsynonymous | 0 | 2 |
| SPATA17      | chr1  | 217955580/G//T            | nonsynonymous | 0 | 2 |
| SNTG2        | chr2  | 1161247/G//A              | nonsynonymous | 0 | 2 |

|            |       |                     |               |   |   |
|------------|-------|---------------------|---------------|---|---|
| C2orf16    | chr2  | 27802456/G//A       | nonsynonymous | 0 | 2 |
| IMMT       | chr2  | 86389145/G//A       | nonsynonymous | 0 | 2 |
| MAL        | chr2  | 95715410/G//A       | nonsynonymous | 0 | 2 |
| LRP1B      | chr2  | 141201978/C//T      | synonymous    | 0 | 2 |
| XIRP2      | chr2  | 168102520/A//C      | nonsynonymous | 0 | 2 |
| TTN        | chr2  | 179640232/C//T      | nonsynonymous | 0 | 2 |
| MAP2       | chr2  | 210545499/T//A      | synonymous    | 0 | 2 |
| DOCK3      | chr3  | 51395491/C//T       | nonsynonymous | 0 | 2 |
| FBXO40     | chr3  | 121340468/G//A      | synonymous    | 0 | 2 |
| NPHP3      | chr3  | 132405120/G//A      | nonsynonymous | 0 | 2 |
| MME        | chr3  | 154832866/C//T      | nonsynonymous | 0 | 2 |
| SKIL       | chr3  | 170078733/T//A      | nonsynonymous | 0 | 2 |
| EVC2       | chr4  | 5624508/G//A        | nonsynonymous | 0 | 2 |
| ADGRL3     | chr4  | 62936266/C//A       | synonymous    | 0 | 2 |
| MAPK10     | chr4  | 87028508/G//T       | synonymous    | 0 | 2 |
| GRIA2      | chr4  | 158284166/C//T      | synonymous    | 0 | 2 |
| CYP4V2     | chr4  | 187130015/TCAGGG//T | nonsynonymous | 0 | 2 |
| DROSHA     | chr5  | 31483660/C//A       | nonsynonymous | 0 | 2 |
| THBS4      | chr5  | 79363850/G//A       | nonsynonymous | 0 | 2 |
| ACOT12     | chr5  | 80681619/C//T       | nonsynonymous | 0 | 2 |
| MEGF10     | chr5  | 126676292/G//A      | nonsynonymous | 0 | 2 |
| BRD8       | chr5  | 137495853/C//T      | nonsynonymous | 0 | 2 |
| LARP1      | chr5  | 154193792/G//T      | synonymous    | 0 | 2 |
| GRK6       | chr5  | 176867760/C//T      | synonymous    | 0 | 2 |
| DST        | chr6  | 56499286/G//T       | nonsynonymous | 0 | 2 |
| HIVEP2     | chr6  | 143074721/G//A      | synonymous    | 0 | 2 |
| PAPOLB     | chr7  | 4901458/C//T        | synonymous    | 0 | 2 |
| ZNF680     | chr7  | 63982102/G//T       | nonsynonymous | 0 | 2 |
| COL1A2     | chr7  | 94057787/C//T       | nonsynonymous | 0 | 2 |
| RP1        | chr8  | 55540003/G//T       | synonymous    | 0 | 2 |
| CYP7A1     | chr8  | 59409732/G//A       | synonymous    | 0 | 2 |
| TRPA1      | chr8  | 72966070/G//A       | nonsynonymous | 0 | 2 |
| RIC1       | chr9  | 5763741/C//A        | nonsynonymous | 0 | 2 |
| TEK        | chr9  | 27190654/C//T       | synonymous    | 0 | 2 |
| IKBKAP     | chr9  | 111653498/C//T      | nonsynonymous | 0 | 2 |
| PBX3       | chr9  | 128722969/A//G      | nonsynonymous | 0 | 2 |
| PPP1R26    | chr9  | 138379556/C//T      | nonsynonymous | 0 | 2 |
| CSGALNACT2 | chr10 | 43678784/C//T       | nonsynonymous | 0 | 2 |
| C10orf71   | chr10 | 50534395/G//A       | nonsynonymous | 0 | 2 |
| OR5111     | chr11 | 5462039/G//T        | synonymous    | 0 | 2 |
| OR4C45     | chr11 | 48367133/C//T       | nonsynonymous | 0 | 2 |
| OR4D11     | chr11 | 59271520/G//A       | nonsynonymous | 0 | 2 |
| CEP164     | chr11 | 117265117/C//T      | nonsynonymous | 0 | 2 |
| FGF23      | chr12 | 4479778/C//A        | nonsynonymous | 0 | 2 |
| GPD1       | chr12 | 50498531/TGTG//T    | nonsynonymous | 0 | 2 |
| STAB2      | chr12 | 104156142/C//T      | nonsynonymous | 0 | 2 |
| TBX3       | chr12 | 115112282/C//A      | synonymous    | 0 | 2 |
| ZC3H13     | chr13 | 46541939/G//A       | nonsynonymous | 0 | 2 |
| UGGT2      | chr13 | 96508528/G//A       | nonsynonymous | 0 | 2 |
| HS6ST3     | chr13 | 97484922/C//T       | nonsynonymous | 0 | 2 |
| FANCM      | chr14 | 45665742/A//G       | nonsynonymous | 0 | 2 |
| PAPLN      | chr14 | 73719483/G//A       | nonsynonymous | 0 | 2 |
| TSHR       | chr14 | 81610843/T//C       | synonymous    | 0 | 2 |
| UNC13C     | chr15 | 54847643/G//T       | nonsynonymous | 0 | 2 |
| SRRM2      | chr16 | 2816561/C//T        | nonsynonymous | 0 | 2 |
| ZDHHC1     | chr16 | 67428979/G//A       | nonsynonymous | 0 | 2 |
| TP53       | chr17 | 7577609/C//A        | nonsynonymous | 0 | 2 |
| DNAH2      | chr17 | 7661952/C//T        | nonsynonymous | 0 | 2 |
| DNAH2      | chr17 | 7662780/G//A        | nonsynonymous | 0 | 2 |
| MFSD6L     | chr17 | 8701083/C//A        | nonsynonymous | 0 | 2 |
| B4GALNT2   | chr17 | 47230234/G//T       | synonymous    | 0 | 2 |
| HSF5       | chr17 | 56557283/G//T       | nonsynonymous | 0 | 2 |
| DNAI2      | chr17 | 72278019/G//A       | synonymous    | 0 | 2 |
| DNAH17     | chr17 | 76556973/T//C       | nonsynonymous | 0 | 2 |
| CCDC102B   | chr18 | 66721381/C//A       | synonymous    | 0 | 2 |
| RHPN2      | chr19 | 33535174/C//T       | nonsynonymous | 0 | 2 |
| SIPA1L3    | chr19 | 38643527/G//T       | nonsynonymous | 0 | 2 |
| IFNL1      | chr19 | 39788648/G//A       | synonymous    | 0 | 2 |
| HNRNPUL1   | chr19 | 41770664/C//T       | nonsynonymous | 0 | 2 |
| PRR19      | chr19 | 42814069/C//A       | synonymous    | 0 | 2 |

|           |       |                |               |   |   |
|-----------|-------|----------------|---------------|---|---|
| KLK14     | chr19 | 51581261/C//G  | synonymous    | 0 | 2 |
| RALGAPB   | chr20 | 37146584/A//T  | nonsynonymous | 0 | 2 |
| TFAP2C    | chr20 | 55208518/G//A  | synonymous    | 0 | 2 |
| DIDO1     | chr20 | 61513648/C//T  | synonymous    | 0 | 2 |
| ADAMTS5   | chr21 | 28337976/C//T  | synonymous    | 0 | 2 |
| TANGO2    | chr22 | 20049139/C//T  | nonsynonymous | 0 | 2 |
| TTC28     | chr22 | 28378457/G//A  | nonsynonymous | 0 | 2 |
| CSF2RB    | chr22 | 37334323/C//T  | nonsynonymous | 0 | 2 |
| FBLN1     | chr22 | 45943038/C//T  | synonymous    | 0 | 2 |
| FRMPD4    | chrX  | 12735911/T//C  | nonsynonymous | 0 | 2 |
| KIAA1210  | chrX  | 118222394/G//T | synonymous    | 0 | 2 |
| DCAF12L1  | chrX  | 125686452/G//A | nonsynonymous | 0 | 2 |
| PADI1     | chr1  | 17563856/C//G  | nonsynonymous | 0 | 2 |
| NRXN1     | chr2  | 51255159/G//A  | nonsynonymous | 0 | 2 |
| OBSL1     | chr2  | 220431600/C//T | nonsynonymous | 0 | 2 |
| DAW1      | chr2  | 228736411/G//A | synonymous    | 0 | 2 |
| IMPDH2    | chr3  | 49065958/G//A  | nonsynonymous | 0 | 2 |
| KDR       | chr4  | 55948806/C//A  | synonymous    | 0 | 2 |
| TLR3      | chr4  | 187004649/A//G | synonymous    | 0 | 2 |
| NIM1K     | chr5  | 43277343/C//T  | synonymous    | 0 | 2 |
| APC       | chr5  | 112175525/G//T | nonsynonymous | 0 | 2 |
| AHI1      | chr6  | 135749776/G//A | nonsynonymous | 0 | 2 |
| POLD2     | chr7  | 44154493/G//A  | nonsynonymous | 0 | 2 |
| SMO       | chr7  | 128848687/G//A | nonsynonymous | 0 | 2 |
| EBF2      | chr8  | 25766064/A//T  | nonsynonymous | 0 | 2 |
| OSR2      | chr8  | 99961843/C//T  | synonymous    | 0 | 2 |
| TG        | chr8  | 133885337/G//A | nonsynonymous | 0 | 2 |
| COL22A1   | chr8  | 139890150/G//A | synonymous    | 0 | 2 |
| SPATA31E1 | chr9  | 90502636/G//A  | synonymous    | 0 | 2 |
| OR1N1     | chr9  | 125288840/C//T | nonsynonymous | 0 | 2 |
| NOTCH1    | chr9  | 139407553/G//A | nonsynonymous | 0 | 2 |
| LRRTM3    | chr10 | 68857603/G//A  | synonymous    | 0 | 2 |
| GRID1     | chr10 | 87966238/C//T  | nonsynonymous | 0 | 2 |
| PDE3B     | chr11 | 14666067/G//A  | nonsynonymous | 0 | 2 |
| KMT2A     | chr11 | 118373478/A//G | nonsynonymous | 0 | 2 |
| ASUN      | chr12 | 27064156/G//T  | nonsynonymous | 0 | 2 |
| ARPC3     | chr12 | 110873938/G//T | nonsynonymous | 0 | 2 |
| TUBA3C    | chr13 | 19753683/G//A  | synonymous    | 0 | 2 |
| GPHB5     | chr14 | 63779783/A//G  | synonymous    | 0 | 2 |
| EVL       | chr14 | 100608082/G//C | nonsynonymous | 0 | 2 |
| SMAD6     | chr15 | 67073514/G//A  | nonsynonymous | 0 | 2 |
| POLG      | chr15 | 89876408/C//T  | nonsynonymous | 0 | 2 |
| NLRC3     | chr16 | 3613509/C//T   | nonsynonymous | 0 | 2 |
| ITPRIPL2  | chr16 | 19127324/G//A  | nonsynonymous | 0 | 2 |
| IRX6      | chr16 | 55362612/A//C  | nonsynonymous | 0 | 2 |
| COG4      | chr16 | 70557324/T//C  | synonymous    | 0 | 2 |
| FOXF1     | chr16 | 86544853/C//A  | synonymous    | 0 | 2 |
| PIK3R5    | chr17 | 8792007/G//A   | nonsynonymous | 0 | 2 |
| KSR1      | chr17 | 25910106/C//T  | nonsynonymous | 0 | 2 |
| ANKFN1    | chr17 | 54526456/C//T  | synonymous    | 0 | 2 |
| SERPINB12 | chr18 | 61228356/G//A  | synonymous    | 0 | 2 |
| NFATC1    | chr18 | 77171334/C//T  | synonymous    | 0 | 2 |
| LPAR2     | chr19 | 19738008/C//T  | nonsynonymous | 0 | 2 |
| TSKS      | chr19 | 50251422/C//T  | nonsynonymous | 0 | 2 |
| ZNF814    | chr19 | 58385448/C//T  | nonsynonymous | 0 | 2 |
| ZNF337    | chr20 | 25656283/C//T  | synonymous    | 0 | 2 |
| DLGAP4    | chr20 | 35060532/C//T  | nonsynonymous | 0 | 2 |
| PTPRT     | chr20 | 40747036/G//C  | synonymous    | 0 | 2 |
| WWC3      | chrX  | 10102561/G//A  | synonymous    | 0 | 2 |
| MAGEB6    | chrX  | 26212383/T//A  | nonsynonymous | 0 | 2 |
| WDR13     | chrX  | 48457313/C//T  | nonsynonymous | 0 | 2 |
| PCKS1N    | chrX  | 48689731/C//T  | nonsynonymous | 0 | 2 |
| SLC7A3    | chrX  | 70149560/C//T  | synonymous    | 0 | 2 |
| MAGEC3    | chrX  | 140985546/C//T | synonymous    | 0 | 2 |
| SPANXN1   | chrX  | 144337246/A//G | nonsynonymous | 0 | 2 |
| MUC6      | chr11 | 1018169/C//G   | synonymous    | 1 | 1 |
| ZNF540    | chr19 | 38090521/T//C  | synonymous    | 1 | 1 |
| CDC27     | chr17 | 45234713/T//G  | synonymous    | 0 | 2 |
| SAMD11    | chr1  | 879438/G//A    | nonsynonymous | 0 | 2 |
| C1orf158  | chr1  | 12820783/T//G  | nonsynonymous | 0 | 2 |

|          |       |                    |               |   |   |
|----------|-------|--------------------|---------------|---|---|
| BEST4    | chr1  | 45250796/TAGA//T   | nonsynonymous | 0 | 2 |
| WLS      | chr1  | 68611546/G//T      | synonymous    | 0 | 2 |
| CGN      | chr1  | 151491544/C//T     | synonymous    | 0 | 2 |
| ADCY10   | chr1  | 167792340/C//A     | synonymous    | 0 | 2 |
| MRPS14   | chr1  | 174992588/T//A     | synonymous    | 0 | 2 |
| LAMB3    | chr1  | 209807883/G//T     | nonsynonymous | 0 | 2 |
| TRAF3IP3 | chr1  | 209948949/C//T     | synonymous    | 0 | 2 |
| OBSCN    | chr1  | 228481947/G//A     | synonymous    | 0 | 2 |
| SLC35F3  | chr1  | 234367172/G//A     | nonsynonymous | 0 | 2 |
| NID1     | chr1  | 236192973/C//T     | nonsynonymous | 0 | 2 |
| RIF1     | chr2  | 152320972/A//G     | synonymous    | 0 | 2 |
| CYTIP    | chr2  | 158272481/G//A     | nonsynonymous | 0 | 2 |
| ATF2     | chr2  | 175962237/T//A     | nonsynonymous | 0 | 2 |
| CCDC141  | chr2  | 179742706/A//T     | synonymous    | 0 | 2 |
| CHPF     | chr2  | 220404662/C//T     | nonsynonymous | 0 | 2 |
| ALPP     | chr2  | 233246432/G//T     | nonsynonymous | 0 | 2 |
| SAG      | chr2  | 234229317/G//A     | nonsynonymous | 0 | 2 |
| PPP1R7   | chr2  | 242097242/G//T     | nonsynonymous | 0 | 2 |
| CDCP1    | chr3  | 45152273/T//TTAAAC | nonsynonymous | 0 | 2 |
| CACNA1D  | chr3  | 53757544/G//A      | nonsynonymous | 0 | 2 |
| BOC      | chr3  | 112997066/C//T     | nonsynonymous | 0 | 2 |
| CASR     | chr3  | 122003306/C//T     | synonymous    | 0 | 2 |
| TFRC     | chr3  | 195782058/C//T     | nonsynonymous | 0 | 2 |
|          | chr4  | 5894638/C//T       | synonymous    | 0 | 2 |
| PDGFRA   | chr4  | 55161324/C//T      | nonsynonymous | 0 | 2 |
| ABCG2    | chr4  | 89052252/G//T      | synonymous    | 0 | 2 |
| GRID2    | chr4  | 94032033/C//T      | nonsynonymous | 0 | 2 |
| ANKRD50  | chr4  | 125592031/A//G     | synonymous    | 0 | 2 |
| FREM3    | chr4  | 144620940/G//A     | nonsynonymous | 0 | 2 |
| FBXW7    | chr4  | 153247204/C//A     | nonsynonymous | 0 | 2 |
| FSTL5    | chr4  | 162376242/C//G     | synonymous    | 0 | 2 |
| TRAPPC11 | chr4  | 184628011/T//A     | nonsynonymous | 0 | 2 |
| ADCY2    | chr5  | 7727287/C//T       | nonsynonymous | 0 | 2 |
| NIM1K    | chr5  | 43246015/G//A      | synonymous    | 0 | 2 |
| ANKRD31  | chr5  | 74400601/C//G      | nonsynonymous | 0 | 2 |
| APC      | chr5  | 112176964/G//A     | synonymous    | 0 | 2 |
| PCDHGB6  | chr5  | 140789134/G//A     | synonymous    | 0 | 2 |
| ADAMTS2  | chr5  | 178555035/C//T     | nonsynonymous | 0 | 2 |
| DNAH8    | chr6  | 38840417/G//A      | nonsynonymous | 0 | 2 |
| PTCHD4   | chr6  | 47846408/G//A      | synonymous    | 0 | 2 |
| FNDC1    | chr6  | 159653533/C//T     | synonymous    | 0 | 2 |
| SDK1     | chr7  | 4169715/G//A       | nonsynonymous | 0 | 2 |
| ZNF853   | chr7  | 6662431/C//T       | synonymous    | 0 | 2 |
| GTF2IRD1 | chr7  | 73973268/G//A      | nonsynonymous | 0 | 2 |
| GAL3ST4  | chr7  | 99757738/C//T      | nonsynonymous | 0 | 2 |
| PCOLCE   | chr7  | 100201623/C//A     | nonsynonymous | 0 | 2 |
| NOS3     | chr7  | 150698351/C//T     | synonymous    | 0 | 2 |
| DPP6     | chr7  | 154667804/C//T     | nonsynonymous | 0 | 2 |
| PTPRN2   | chr7  | 158282442/C//T     | nonsynonymous | 0 | 2 |
| CSMD1    | chr8  | 3072103/T//G       | nonsynonymous | 0 | 2 |
| SPIDR    | chr8  | 48639798/C//A      | nonsynonymous | 0 | 2 |
| VCPIP1   | chr8  | 67577110/G//A      | nonsynonymous | 0 | 2 |
| SBSPON   | chr8  | 73993446/G//A      | nonsynonymous | 0 | 2 |
| FBXO10   | chr9  | 37516025/C//T      | nonsynonymous | 0 | 2 |
| TJP2     | chr9  | 71852871/G//C      | nonsynonymous | 0 | 2 |
| FANCC    | chr9  | 97897640/T//C      | synonymous    | 0 | 2 |
| ZNF462   | chr9  | 109692894/C//T     | nonsynonymous | 0 | 2 |
| NUP214   | chr9  | 134070655/C//T     | nonsynonymous | 0 | 2 |
| ADAMTS13 | chr9  | 136297766/C//T     | nonsynonymous | 0 | 2 |
| MAP3K8   | chr10 | 30736779/T//G      | synonymous    | 0 | 2 |
| PARD3    | chr10 | 34558680/G//A      | synonymous    | 0 | 2 |
| C10orf71 | chr10 | 50534222/C//T      | nonsynonymous | 0 | 2 |
| P4HA1    | chr10 | 74828736/T//A      | nonsynonymous | 0 | 2 |
| BMPR1A   | chr10 | 88672027/T//G      | synonymous    | 0 | 2 |
| EXOC6    | chr10 | 94675507/C//A      | synonymous    | 0 | 2 |
| SFRP5    | chr10 | 99527528/C//T      | nonsynonymous | 0 | 2 |
| OR52L1   | chr11 | 6007488/T//C       | nonsynonymous | 0 | 2 |
| DGKZ     | chr11 | 46394565/G//A      | nonsynonymous | 0 | 2 |
| OR5D13   | chr11 | 55541545/G//A      | nonsynonymous | 0 | 2 |
| FIBP     | chr11 | 65653098/G//A      | synonymous    | 0 | 2 |

|          |       |                |               |   |   |
|----------|-------|----------------|---------------|---|---|
| FGF19    | chr11 | 69514314/C//T  | nonsynonymous | 0 | 2 |
| ANO1     | chr11 | 69962565/G//A  | nonsynonymous | 0 | 2 |
| POU2F3   | chr11 | 120176347/G//A | synonymous    | 0 | 2 |
| TECTA    | chr11 | 120983847/G//A | nonsynonymous | 0 | 2 |
| ST3GAL4  | chr11 | 126278027/C//T | synonymous    | 0 | 2 |
| ADAMTS8  | chr11 | 130289058/C//T | nonsynonymous | 0 | 2 |
| CLEC4A   | chr12 | 8288182/G//T   | nonsynonymous | 0 | 2 |
| PZP      | chr12 | 9346733/C//T   | synonymous    | 0 | 2 |
| C2CD5    | chr12 | 22697103/T//C  | synonymous    | 0 | 2 |
| ARL1     | chr12 | 101801517/G//T | synonymous    | 0 | 2 |
| RPH3A    | chr12 | 113327879/G//A | synonymous    | 0 | 2 |
| RNFT2    | chr12 | 117287160/T//C | synonymous    | 0 | 2 |
| TRPC4    | chr13 | 38320332/G//A  | synonymous    | 0 | 2 |
| CYSLTR2  | chr13 | 49281668/C//T  | nonsynonymous | 0 | 2 |
| SCEL     | chr13 | 78146321/G//T  | nonsynonymous | 0 | 2 |
| SLITRK1  | chr13 | 84453819/G//A  | synonymous    | 0 | 2 |
| MYO16    | chr13 | 109550367/G//A | nonsynonymous | 0 | 2 |
| LTB4R2   | chr14 | 24780795/G//A  | nonsynonymous | 0 | 2 |
| GEMIN2   | chr14 | 39594200/G//T  | nonsynonymous | 0 | 2 |
| SYNE2    | chr14 | 64444652/G//A  | synonymous    | 0 | 2 |
| UNC79    | chr14 | 94139775/G//A  | nonsynonymous | 0 | 2 |
| SLC24A5  | chr15 | 48414111/C//T  | nonsynonymous | 0 | 2 |
| CYP1A2   | chr15 | 75042757/C//T  | synonymous    | 0 | 2 |
| BNC1     | chr15 | 83933220/G//A  | synonymous    | 0 | 2 |
| ACAN     | chr15 | 89400777/C//A  | nonsynonymous | 0 | 2 |
| ZNF598   | chr16 | 2052252/C//T   | nonsynonymous | 0 | 2 |
| PKD1L2   | chr16 | 81190533/G//A  | synonymous    | 0 | 2 |
| ADAD2    | chr16 | 84229828/G//A  | nonsynonymous | 0 | 2 |
| MYOCD    | chr17 | 12666404/G//A  | nonsynonymous | 0 | 2 |
| AP2B1    | chr17 | 33935314/G//A  | nonsynonymous | 0 | 2 |
| MAPT     | chr17 | 44060900/C//T  | nonsynonymous | 0 | 2 |
| DNAH17   | chr17 | 76533475/C//T  | nonsynonymous | 0 | 2 |
| MTCL1    | chr18 | 8813127/G//A   | nonsynonymous | 0 | 2 |
| MIB1     | chr18 | 19359498/A//G  | nonsynonymous | 0 | 2 |
| CELF4    | chr18 | 34854357/G//A  | nonsynonymous | 0 | 2 |
| SERPINB7 | chr18 | 61468118/G//T  | nonsynonymous | 0 | 2 |
| BSG      | chr19 | 581598/C//T    | synonymous    | 0 | 2 |
| SAFB     | chr19 | 5664112/C//T   | nonsynonymous | 0 | 2 |
| KRI1     | chr19 | 10670606/G//A  | synonymous    | 0 | 2 |
| MAP1S    | chr19 | 17837565/G//A  | nonsynonymous | 0 | 2 |
| ZNF91    | chr19 | 23545427/C//T  | synonymous    | 0 | 2 |
| CLIP3    | chr19 | 36517504/C//T  | synonymous    | 0 | 2 |
| TIMM50   | chr19 | 39980373/C//T  | synonymous    | 0 | 2 |
| MBOAT7   | chr19 | 54692357/C//A  | synonymous    | 0 | 2 |
| XKR7     | chr20 | 30584778/G//A  | nonsynonymous | 0 | 2 |
| PHF20    | chr20 | 34389505/G//A  | nonsynonymous | 0 | 2 |
| TPD52L2  | chr20 | 62521257/G//A  | nonsynonymous | 0 | 2 |
| LKAAEAR1 | chr20 | 62715013/C//T  | nonsynonymous | 0 | 2 |
| MYT1     | chr20 | 62836442/G//A  | synonymous    | 0 | 2 |
| USP25    | chr21 | 17250799/C//T  | synonymous    | 0 | 2 |
| GABPA    | chr21 | 27124343/G//A  | synonymous    | 0 | 2 |
| MICAL3   | chr22 | 18300441/G//A  | synonymous    | 0 | 2 |
| MED15    | chr22 | 20937518/G//A  | synonymous    | 0 | 2 |
| HORMAD2  | chr22 | 30514974/G//T  | synonymous    | 0 | 2 |
| EP300    | chr22 | 41542766/A//G  | nonsynonymous | 0 | 2 |
| CASK     | chrX  | 41379671/G//A  | synonymous    | 0 | 2 |
| MAGEC1   | chrX  | 140995937/C//T | nonsynonymous | 0 | 2 |
| PDZD4    | chrX  | 153069675/C//T | synonymous    | 0 | 2 |
| GDI1     | chrX  | 153670996/G//A | nonsynonymous | 0 | 2 |
| ELAVL4   | chr1  | 50661335/C//T  | nonsynonymous | 0 | 2 |
| NTNG1    | chr1  | 107937929/C//A | synonymous    | 0 | 2 |
| USH2A    | chr1  | 216019297/A//G | nonsynonymous | 0 | 2 |
| RYR2     | chr1  | 237754065/G//A | synonymous    | 0 | 2 |
| PSMD2    | chr3  | 184019363/C//A | synonymous    | 0 | 2 |
| MUC4     | chr3  | 195516765/G//A | synonymous    | 0 | 2 |
| IL21     | chr4  | 123542048/C//T | nonsynonymous | 0 | 2 |
| DNAH5    | chr5  | 13817688/C//T  | synonymous    | 0 | 2 |
| IQGAP2   | chr5  | 75996995/G//C  | nonsynonymous | 0 | 2 |
| GPX3     | chr5  | 150406496/G//A | nonsynonymous | 0 | 2 |
| TCP11    | chr6  | 35103896/A//C  | nonsynonymous | 0 | 2 |

|           |       |                |               |   |   |
|-----------|-------|----------------|---------------|---|---|
| TRDN      | chr6  | 123588882/G//C | nonsynonymous | 0 | 2 |
| CHST12    | chr7  | 2472574/C//T   | synonymous    | 0 | 2 |
| HDAC9     | chr7  | 18669028/G//C  | nonsynonymous | 0 | 2 |
| GRM3      | chr7  | 86415654/G//A  | synonymous    | 0 | 2 |
| ACHE      | chr7  | 100491069/G//T | nonsynonymous | 0 | 2 |
| FIS1      | chr7  | 100887397/A//G | synonymous    | 0 | 2 |
| TBXAS1    | chr7  | 139653218/C//T | nonsynonymous | 0 | 2 |
| SLC20A2   | chr8  | 42302276/G//A  | synonymous    | 0 | 2 |
| PXDNL     | chr8  | 52320916/T//A  | nonsynonymous | 0 | 2 |
| SLCO5A1   | chr8  | 70674113/G//A  | synonymous    | 0 | 2 |
| TMEM67    | chr8  | 94794688/T//C  | synonymous    | 0 | 2 |
| TMOD1     | chr9  | 100328214/C//T | nonsynonymous | 0 | 2 |
| GRIN3A    | chr9  | 104433256/G//A | nonsynonymous | 0 | 2 |
| ASB6      | chr9  | 132400631/A//G | nonsynonymous | 0 | 2 |
| RPL7A     | chr9  | 136218179/C//T | synonymous    | 0 | 2 |
| CACNA1B   | chr9  | 141016110/C//T | nonsynonymous | 0 | 2 |
| UCMA      | chr10 | 13276307/G//A  | synonymous    | 0 | 2 |
| HNRNPH3   | chr10 | 70097718/T//C  | synonymous    | 0 | 2 |
| MAPK8IP1  | chr11 | 45926798/G//A  | synonymous    | 0 | 2 |
| OR4C16    | chr11 | 55339950/C//T  | nonsynonymous | 0 | 2 |
| OR5T3     | chr11 | 56020212/C//A  | nonsynonymous | 0 | 2 |
| DRAP1     | chr11 | 65686838/C//T  | synonymous    | 0 | 2 |
| SHANK2    | chr11 | 70331532/G//A  | synonymous    | 0 | 2 |
| DGAT2     | chr11 | 75509332/C//T  | synonymous    | 0 | 2 |
| ATM       | chr11 | 108100022/C//G | synonymous    | 0 | 2 |
| C11orf87  | chr11 | 109294937/C//T | nonsynonymous | 0 | 2 |
| TRPV4     | chr12 | 110230452/C//T | synonymous    | 0 | 2 |
| ZNF10     | chr12 | 133732200/A//G | nonsynonymous | 0 | 2 |
| FLT3      | chr13 | 28644740/G//T  | nonsynonymous | 0 | 2 |
| FREM2     | chr13 | 39433471/T//G  | nonsynonymous | 0 | 2 |
| RYR3      | chr15 | 33928584/G//A  | nonsynonymous | 0 | 2 |
| FAM227B   | chr15 | 49833942/G//A  | nonsynonymous | 0 | 2 |
| TNFAIP8L3 | chr15 | 51350185/C//T  | nonsynonymous | 0 | 2 |
| SLX4      | chr16 | 3639704/C//G   | nonsynonymous | 0 | 2 |
| SLX4      | chr16 | 3639707/A//G   | nonsynonymous | 0 | 2 |
| DPEP2     | chr16 | 68024026/G//A  | synonymous    | 0 | 2 |
| TBC1D28   | chr17 | 18542007/C//T  | nonsynonymous | 0 | 2 |
| TEPSIN    | chr17 | 79212886/A//G  | synonymous    | 0 | 2 |
| DPP9-AS1  | chr19 | 4683327/C//T   | nonsynonymous | 0 | 2 |
| SLC25A41  | chr19 | 6430156/G//A   | nonsynonymous | 0 | 2 |
| GZF1      | chr20 | 23346053/G//A  | nonsynonymous | 0 | 2 |
| RRP1B     | chr21 | 45108001/C//T  | synonymous    | 0 | 2 |
| P2RY10    | chrX  | 78216570/C//A  | nonsynonymous | 0 | 2 |
| TEX13B    | chrX  | 107225121/G//A | synonymous    | 0 | 2 |
| TTC34     | chr1  | 2704168/G//A   | nonsynonymous | 0 | 2 |
| ALDH4A1   | chr1  | 19202875/G//A  | synonymous    | 0 | 2 |
| HNRNPR    | chr1  | 23637528/G//A  | nonsynonymous | 0 | 2 |
| BCL9      | chr1  | 147091036/C//T | nonsynonymous | 0 | 2 |
| SELP      | chr1  | 169580777/C//T | nonsynonymous | 0 | 2 |
| SEC16B    | chr1  | 177927431/G//A | nonsynonymous | 0 | 2 |
| C4BPA     | chr1  | 207297306/C//T | synonymous    | 0 | 2 |
| APOB      | chr2  | 21228460/C//T  | synonymous    | 0 | 2 |
| SCN2A     | chr2  | 166188041/C//T | nonsynonymous | 0 | 2 |
| CALCRL    | chr2  | 188217027/G//A | synonymous    | 0 | 2 |
| NBEAL1    | chr2  | 203922136/T//A | nonsynonymous | 0 | 2 |
| KLHL40    | chr3  | 42727514/C//T  | nonsynonymous | 0 | 2 |
| BSN       | chr3  | 49689855/C//A  | nonsynonymous | 0 | 2 |
| FOXP1     | chr3  | 71015056/G//C  | nonsynonymous | 0 | 2 |
| CCDC149   | chr4  | 24833204/T//C  | nonsynonymous | 0 | 2 |
| CTNND2    | chr5  | 11022979/C//T  | synonymous    | 0 | 2 |
| CDH12     | chr5  | 21751762/A//T  | synonymous    | 0 | 2 |
| SKIV2L2   | chr5  | 54645429/A//C  | synonymous    | 0 | 2 |
| SLC12A2   | chr5  | 127484508/T//A | nonsynonymous | 0 | 2 |
| PCDHA6    | chr5  | 140209658/C//T | nonsynonymous | 0 | 2 |
| PCDHA10   | chr5  | 140235823/C//T | nonsynonymous | 0 | 2 |
| DST       | chr6  | 56504092/G//A  | nonsynonymous | 0 | 2 |
| PNISR     | chr6  | 99862548/A//C  | synonymous    | 0 | 2 |
| SYNE1     | chr6  | 152694259/C//T | synonymous    | 0 | 2 |
| TIAM2     | chr6  | 155451018/G//A | nonsynonymous | 0 | 2 |
| MYL10     | chr7  | 101256809/G//T | nonsynonymous | 0 | 2 |

|               |       |                 |               |   |   |
|---------------|-------|-----------------|---------------|---|---|
| LMBR1         | chr7  | 156521374/C//A  | synonymous    | 0 | 2 |
| MROH6         | chr8  | 144651882/C//G  | synonymous    | 0 | 2 |
| TTC39B        | chr9  | 15182379/A//C   | nonsynonymous | 0 | 2 |
| RNF20         | chr9  | 104297738/A//T  | synonymous    | 0 | 2 |
| GSN           | chr9  | 124065184/C//T  | synonymous    | 0 | 2 |
| KCNT1         | chr9  | 138648724/C//T  | synonymous    | 0 | 2 |
| AP2A2         | chr11 | 1009380/G//A    | nonsynonymous | 0 | 2 |
| LMO1          | chr11 | 8251849/G//A    | synonymous    | 0 | 2 |
| ZDHHC5        | chr11 | 57466726/C//T   | synonymous    | 0 | 2 |
| DTX3          | chr12 | 58001002/G//A   | nonsynonymous | 0 | 2 |
| GAS2L3        | chr12 | 101018303/G//T  | nonsynonymous | 0 | 2 |
| STAB2         | chr12 | 104049365/G//A  | synonymous    | 0 | 2 |
| DACH1         | chr13 | 72053354/C//G   | nonsynonymous | 0 | 2 |
| SLC15A1       | chr13 | 99360965/G//A   | nonsynonymous | 0 | 2 |
| OR4N2         | chr14 | 20295838/G//A   | synonymous    | 0 | 2 |
| HERC2         | chr15 | 28505917/C//T   | synonymous    | 0 | 2 |
| BUB1B-PAK6    | chr15 | 40564422/C//A   | synonymous    | 0 | 2 |
| JMJD7-PLA2G4B | chr15 | 42132385/G//A   | synonymous    | 0 | 2 |
| ANKS4B        | chr16 | 21261257/C//T   | nonsynonymous | 0 | 2 |
| KIAA0556      | chr16 | 27751487/C//T   | synonymous    | 0 | 2 |
| CNOT1         | chr16 | 58555154/G//C   | nonsynonymous | 0 | 2 |
| JPH3          | chr16 | 87678059/G//A   | nonsynonymous | 0 | 2 |
| PITPNM3       | chr17 | 6373651/C//T    | nonsynonymous | 0 | 2 |
| TP53          | chr17 | 7579312/C//T    | synonymous    | 0 | 2 |
| CENPV         | chr17 | 16253293/A//T   | nonsynonymous | 0 | 2 |
| CCT6B         | chr17 | 33269517/C//T   | nonsynonymous | 0 | 2 |
| ABCA6         | chr17 | 67082780/T//C   | nonsynonymous | 0 | 2 |
| TMPRSS9       | chr19 | 2405505/C//T    | synonymous    | 0 | 2 |
| MUC16         | chr19 | 9061629/C//T    | nonsynonymous | 0 | 2 |
| WIZ           | chr19 | 15558930/G//T   | synonymous    | 0 | 2 |
| ELL           | chr19 | 18572626/G//T   | nonsynonymous | 0 | 2 |
| CILP2         | chr19 | 19654099/C//T   | synonymous    | 0 | 2 |
| UBA2          | chr19 | 34951452/C//T   | synonymous    | 0 | 2 |
| ZNF225        | chr19 | 44636885/A//G   | synonymous    | 0 | 2 |
| FPR2          | chr19 | 52272072/G//A   | nonsynonymous | 0 | 2 |
| DEFB128       | chr20 | 168744/T//G     | nonsynonymous | 0 | 2 |
| MRPS26        | chr20 | 3026773/T//TGG  | nonsynonymous | 0 | 2 |
| POTED         | chr21 | 14982506/C//T   | synonymous    | 0 | 2 |
| MYO18B        | chr22 | 26423239/C//T   | synonymous    | 0 | 2 |
| LARGE1        | chr22 | 33780238/C//T   | nonsynonymous | 0 | 2 |
| CERK          | chr22 | 47108093/G//A   | synonymous    | 0 | 2 |
| KLHL34        | chrX  | 21674416/G//A   | synonymous    | 0 | 2 |
| ABCB7         | chrX  | 74289296/G//A   | synonymous    | 0 | 2 |
| COL4A5        | chrX  | 107850057/G//A  | nonsynonymous | 0 | 2 |
| MIER1         | chr1  | 67437399/T//A   | nonsynonymous | 0 | 2 |
| SPTA1         | chr1  | 158641934/C//T  | nonsynonymous | 0 | 2 |
| CADM3         | chr1  | 159162405/G//A  | synonymous    | 0 | 2 |
| PRRC2C        | chr1  | 171510110/C//T  | nonsynonymous | 0 | 2 |
| KCNS3         | chr2  | 18112885/G//A   | nonsynonymous | 0 | 2 |
| MARCO         | chr2  | 119735446/G//A  | nonsynonymous | 0 | 2 |
| LRP2          | chr2  | 170044631/G//A  | synonymous    | 0 | 2 |
| COL6A3        | chr2  | 238283455/G//A  | synonymous    | 0 | 2 |
| CAPN10        | chr2  | 241535800/GC//G | nonsynonymous | 0 | 2 |
| PTH1R         | chr3  | 46945102/C//T   | nonsynonymous | 0 | 2 |
| C3orf62       | chr3  | 49314135/C//T   | synonymous    | 0 | 2 |
| GNAI2         | chr3  | 50295131/G//A   | synonymous    | 0 | 2 |
| TLR9          | chr3  | 52257944/G//A   | synonymous    | 0 | 2 |
| EPHA3         | chr3  | 89259600/C//T   | synonymous    | 0 | 2 |
| LOC101929106  | chr3  | 186915250/G//A  | synonymous    | 0 | 2 |
| LRBA          | chr4  | 151511990/G//A  | nonsynonymous | 0 | 2 |
| GRM1          | chr6  | 146755554/G//A  | synonymous    | 0 | 2 |
| AFDN          | chr6  | 168366435/A//C  | nonsynonymous | 0 | 2 |
| SCRN1         | chr7  | 29976312/C//A   | nonsynonymous | 0 | 2 |
| GLI3          | chr7  | 42005805/G//A   | nonsynonymous | 0 | 2 |
| ALKBH4        | chr7  | 102098332/C//T  | nonsynonymous | 0 | 2 |
| AASS          | chr7  | 121741475/G//A  | synonymous    | 0 | 2 |
| RPS20         | chr8  | 56985782/G//A   | nonsynonymous | 0 | 2 |
| ANKRD18A      | chr9  | 38615690/G//A   | synonymous    | 0 | 2 |
| LAMC3         | chr9  | 133942460/G//A  | nonsynonymous | 0 | 2 |
| OGDHL         | chr10 | 50943247/C//A   | synonymous    | 0 | 2 |

|          |       |                            |               |   |   |
|----------|-------|----------------------------|---------------|---|---|
| CTNNA3   | chr10 | 68139057/C//A              | nonsynonymous | 0 | 2 |
| FAM160B1 | chr10 | 116595383/G//A             | nonsynonymous | 0 | 2 |
| IFITM10  | chr11 | 1756635/C//A               | nonsynonymous | 0 | 2 |
| PTPMT1   | chr11 | 47593062/G//A              | nonsynonymous | 0 | 2 |
| ATM      | chr11 | 108124595/A//G             | synonymous    | 0 | 2 |
| SORL1    | chr11 | 121458770/C//T             | nonsynonymous | 0 | 2 |
| SLCO1B1  | chr12 | 21353611/GACATATTTTTTAC//G | synonymous    | 0 | 2 |
| KMT2D    | chr12 | 49431709/C//T              | nonsynonymous | 0 | 2 |
| TNS2     | chr12 | 53452368/C//T              | nonsynonymous | 0 | 2 |
| LRP1     | chr12 | 57573135/G//A              | nonsynonymous | 0 | 2 |
| HECTD4   | chr12 | 112610547/C//T             | nonsynonymous | 0 | 2 |
| MED13L   | chr12 | 116452987/T//A             | nonsynonymous | 0 | 2 |
| MS11     | chr12 | 120795616/C//T             | synonymous    | 0 | 2 |
| TUBA3C   | chr13 | 19747960/G//A              | synonymous    | 0 | 2 |
| RNASE12  | chr14 | 21058725/C//T              | nonsynonymous | 0 | 2 |
| ABHD12B  | chr14 | 51344792/A//T              | nonsynonymous | 0 | 2 |
| TEX9     | chr15 | 56657655/G//A              | nonsynonymous | 0 | 2 |
| ADAMTS7  | chr15 | 79092787/C//T              | nonsynonymous | 0 | 2 |
| SYNM     | chr15 | 99653860/G//A              | nonsynonymous | 0 | 2 |
| ADGRG1   | chr16 | 57693415/G//A              | synonymous    | 0 | 2 |
| PHLPP2   | chr16 | 71683330/G//A              | synonymous    | 0 | 2 |
| SOX15    | chr17 | 7493053/G//A               | synonymous    | 0 | 2 |
| TP53     | chr17 | 7577565/T//G               | nonsynonymous | 0 | 2 |
| ERBB2    | chr17 | 37866626/G//A              | nonsynonymous | 0 | 2 |
| MTMR4    | chr17 | 56573372/G//A              | nonsynonymous | 0 | 2 |
| DUS1L    | chr17 | 80020801/C//T              | nonsynonymous | 0 | 2 |
| CSNK1D   | chr17 | 80210409/A//G              | nonsynonymous | 0 | 2 |
| ZBTB7A   | chr19 | 4054578/T//G               | nonsynonymous | 0 | 2 |
| TUBB4A   | chr19 | 6495666/G//A               | nonsynonymous | 0 | 2 |
| MUC16    | chr19 | 8971814/C//T               | nonsynonymous | 0 | 2 |
| TSSK6    | chr19 | 19625855/C//T              | nonsynonymous | 0 | 2 |
| FUT2     | chr19 | 49206784/C//T              | nonsynonymous | 0 | 2 |
| LRRC4B   | chr19 | 51020907/G//A              | nonsynonymous | 0 | 2 |
| NLRP4    | chr19 | 56370309/C//T              | nonsynonymous | 0 | 2 |
| CST1     | chr20 | 23731307/C//T              | nonsynonymous | 0 | 2 |
| ELMO2    | chr20 | 45008900/T//TTATAGACCGGAGA | nonsynonymous | 0 | 2 |
| ELFN2    | chr22 | 37771475/C//T              | nonsynonymous | 0 | 2 |
| CACNA11  | chr22 | 40080504/G//A              | nonsynonymous | 0 | 2 |
| NHS      | chrX  | 17744925/G//A              | nonsynonymous | 0 | 2 |
| PINK1-AS | chr1  | 20975352/G//A              | synonymous    | 0 | 2 |
| MFSD2A   | chr1  | 40434383/C//T              | nonsynonymous | 0 | 2 |
| SYT6     | chr1  | 114640405/G//A             | nonsynonymous | 0 | 2 |
| SUCO     | chr1  | 172520757/C//A             | nonsynonymous | 0 | 2 |
| DHX9     | chr1  | 182847315/C//A             | synonymous    | 0 | 2 |
| ARID4B   | chr1  | 235384944/G//A             | nonsynonymous | 0 | 2 |
| RASGRP3  | chr2  | 33783393/G//A              | synonymous    | 0 | 2 |
| SPTBN1   | chr2  | 54858309/A//G              | nonsynonymous | 0 | 2 |
| PRPF40A  | chr2  | 153529138/C//G             | nonsynonymous | 0 | 2 |
| LNPB     | chr2  | 176794717/C//T             | nonsynonymous | 0 | 2 |
| TOP2B    | chr3  | 25668727/C//T              | nonsynonymous | 0 | 2 |
| ERC2     | chr3  | 56468542/C//T              | nonsynonymous | 0 | 2 |
| PIK3CA   | chr3  | 178927405/G//A             | nonsynonymous | 0 | 2 |
| VWA5B2   | chr3  | 183955098/C//T             | synonymous    | 0 | 2 |
| NAT8L    | chr4  | 2062814/G//A               | nonsynonymous | 0 | 2 |
| ABHD18   | chr4  | 128905493/G//C             | nonsynonymous | 0 | 2 |
| FBXL7    | chr5  | 15936846/C//T              | nonsynonymous | 0 | 2 |
| ADAMTS12 | chr5  | 33576233/G//T              | nonsynonymous | 0 | 2 |
| DMXL1    | chr5  | 118573026/G//C             | nonsynonymous | 0 | 2 |
| PCDHB15  | chr5  | 140626476/G//A             | nonsynonymous | 0 | 2 |
| FAM196B  | chr5  | 169291376/C//T             | synonymous    | 0 | 2 |
| ZNF454   | chr5  | 178391652/T//A             | synonymous    | 0 | 2 |
| TBC1D9B  | chr5  | 179301933/C//T             | nonsynonymous | 0 | 2 |
| RNF182   | chr6  | 13977817/C//T              | nonsynonymous | 0 | 2 |
| ALDH5A1  | chr6  | 24528372/G//A              | nonsynonymous | 0 | 2 |
| TFEB     | chr6  | 41658537/G//T              | nonsynonymous | 0 | 2 |
| TTBK1    | chr6  | 43230694/C//T              | nonsynonymous | 0 | 2 |
| AK9      | chr6  | 109886053/A//T             | synonymous    | 0 | 2 |
| FUCA2    | chr6  | 143825256/G//T             | synonymous    | 0 | 2 |
| SYNE1    | chr6  | 152485341/G//T             | nonsynonymous | 0 | 2 |
| SEMA3E   | chr7  | 83032029/G//A              | synonymous    | 0 | 2 |



|          |       |                          |               |   |   |
|----------|-------|--------------------------|---------------|---|---|
| TRIM24   | chr7  | 138210038/C//G           | nonsynonymous | 0 | 2 |
| EPHA1    | chr7  | 143098560/C//T           | nonsynonymous | 0 | 2 |
| PCM1     | chr8  | 17808196/T//G            | nonsynonymous | 0 | 2 |
| ADCY8    | chr8  | 131916264/C//T           | synonymous    | 0 | 2 |
| AK8      | chr9  | 135601126/G//A           | synonymous    | 0 | 2 |
| COL5A1   | chr9  | 137622232/G//A           | nonsynonymous | 0 | 2 |
| FBXW5    | chr9  | 139837245/C//T           | nonsynonymous | 0 | 2 |
| WDFY4    | chr10 | 50025362/G//A            | nonsynonymous | 0 | 2 |
| SH3PXD2A | chr10 | 105363170/C//T           | nonsynonymous | 0 | 2 |
| MYBPC3   | chr11 | 47353651/TGCCCTGCCCTGTAA | nonsynonymous | 0 | 2 |
| DDX10    | chr11 | 108547830/C//T           | nonsynonymous | 0 | 2 |
| FZD10    | chr12 | 130649126/C//A           | nonsynonymous | 0 | 2 |
| GALNT9   | chr12 | 132834388/G//A           | nonsynonymous | 0 | 2 |
| PABPC3   | chr13 | 25670547/A//G            | nonsynonymous | 0 | 2 |
| KCNH5    | chr14 | 63416962/C//T            | nonsynonymous | 0 | 2 |
| AHNAK2   | chr14 | 105408167/C//T           | nonsynonymous | 0 | 2 |
| PACS2    | chr14 | 105843233/C//T           | synonymous    | 0 | 2 |
| EIF2AK4  | chr15 | 40259780/G//C            | nonsynonymous | 0 | 2 |
| CFAP161  | chr15 | 81440257/G//A            | nonsynonymous | 0 | 2 |
| ADAMTSL3 | chr15 | 84611716/C//T            | nonsynonymous | 0 | 2 |
| TICRR    | chr15 | 90144726/G//T            | nonsynonymous | 0 | 2 |
| PLCG2    | chr16 | 81888168/G//A            | nonsynonymous | 0 | 2 |
| GUCY2D   | chr17 | 7909860/C//T             | synonymous    | 0 | 2 |
| COL1A1   | chr17 | 48262919/C//T            | nonsynonymous | 0 | 2 |
| MPO      | chr17 | 56356997/C//T            | synonymous    | 0 | 2 |
| GREB1L   | chr18 | 19030983/G//C            | nonsynonymous | 0 | 2 |
| DSG3     | chr18 | 29041264/G//T            | nonsynonymous | 0 | 2 |
| PTPRS    | chr19 | 5208035/C//T             | synonymous    | 0 | 2 |
| SLC6A16  | chr19 | 49812267/G//A            | synonymous    | 0 | 2 |
| SHANK1   | chr19 | 51207687/C//T            | synonymous    | 0 | 2 |
| NLRP4    | chr19 | 56369355/C//T            | nonsynonymous | 0 | 2 |
| EBF4     | chr20 | 2736394/C//T             | synonymous    | 0 | 2 |
| SIGLEC1  | chr20 | 3679928/G//A             | synonymous    | 0 | 2 |
| DSCAM    | chr21 | 41710041/G//A            | synonymous    | 0 | 2 |
| CELSR1   | chr22 | 46806455/G//A            | synonymous    | 0 | 2 |
| FAM47A   | chrX  | 34149076/G//A            | synonymous    | 0 | 2 |
| ITIH6    | chrX  | 54785263/C//T            | nonsynonymous | 0 | 2 |
| IL13RA2  | chrX  | 114244226/T//A           | nonsynonymous | 0 | 2 |
| SLC12A2  | chr5  | 127419934/G//T           | synonymous    | 0 | 2 |
| TAS1R2   | chr1  | 19166642/G//A            | synonymous    | 0 | 2 |
| PLA2G2D  | chr1  | 20441992/G//A            | synonymous    | 0 | 2 |
| RPS6KA1  | chr1  | 26873448/G//T            | nonsynonymous | 0 | 2 |
| PSRC1    | chr1  | 109823599/C//T           | nonsynonymous | 0 | 2 |
| LCE2B    | chr1  | 152659570/G//A           | nonsynonymous | 0 | 2 |
| DENND4B  | chr1  | 153902804/C//T           | nonsynonymous | 0 | 2 |
| MEF2D    | chr1  | 156450646/C//T           | nonsynonymous | 0 | 2 |
| F5       | chr1  | 169529958/G//A           | synonymous    | 0 | 2 |
| GREB1    | chr2  | 11773069/G//A            | nonsynonymous | 0 | 2 |
| TTN      | chr2  | 179574580/C//T           | nonsynonymous | 0 | 2 |
| B3GNT7   | chr2  | 232262990/C//T           | nonsynonymous | 0 | 2 |
| ATP2B2   | chr3  | 10387254/G//A            | synonymous    | 0 | 2 |
| PTH1R    | chr3  | 46944925/C//T            | nonsynonymous | 0 | 2 |
| ZNF589   | chr3  | 48282661/G//T            | synonymous    | 0 | 2 |
| GOLIM4   | chr3  | 167758622/T//C           | synonymous    | 0 | 2 |
| EPHA5    | chr4  | 66217147/C//T            | nonsynonymous | 0 | 2 |
| FSTL5    | chr4  | 162376247/G//A           | nonsynonymous | 0 | 2 |
| SLCO6A1  | chr5  | 101795418/G//A           | synonymous    | 0 | 2 |
| IL17B    | chr5  | 148756510/G//A           | nonsynonymous | 0 | 2 |
| CANX     | chr5  | 179155704/C//T           | synonymous    | 0 | 2 |
| GPX5     | chr6  | 28499621/A//G            | nonsynonymous | 0 | 2 |
| CARD11   | chr7  | 2956983/C//T             | nonsynonymous | 0 | 2 |
| ZPBP     | chr7  | 50097646/G//A            | synonymous    | 0 | 2 |
| SHH      | chr7  | 155604641/C//T           | nonsynonymous | 0 | 2 |
| LEPROTL1 | chr8  | 29963261/G//A            | nonsynonymous | 0 | 2 |
| PKHD1L1  | chr8  | 110439239/G//A           | nonsynonymous | 0 | 2 |
| TAF2     | chr8  | 120744276/T//C           | nonsynonymous | 0 | 2 |
| DAB2IP   | chr9  | 124536676/C//G           | synonymous    | 0 | 2 |
| RPL12    | chr9  | 130213658/G//A           | synonymous    | 0 | 2 |
| ITIH2    | chr10 | 7791191/C//T             | nonsynonymous | 0 | 2 |
| SEC24C   | chr10 | 75525213/C//T            | nonsynonymous | 0 | 2 |

|           |       |                |               |   |   |
|-----------|-------|----------------|---------------|---|---|
| INPP5F    | chr10 | 121586580/C//T | nonsynonymous | 0 | 2 |
| OR52L1    | chr11 | 6007675/G//A   | synonymous    | 0 | 2 |
| FAT3      | chr11 | 92534204/G//A  | synonymous    | 0 | 2 |
| SUOX      | chr12 | 56398366/G//A  | nonsynonymous | 0 | 2 |
| PARP4     | chr13 | 25020846/A//T  | synonymous    | 0 | 2 |
| AKAP6     | chr14 | 33201657/T//C  | synonymous    | 0 | 2 |
| ESRRB     | chr14 | 76957987/C//T  | nonsynonymous | 0 | 2 |
| RCOR1     | chr14 | 103180847/G//A | nonsynonymous | 0 | 2 |
| KCTD5     | chr16 | 2732553/G//A   | nonsynonymous | 0 | 2 |
| KRT33A    | chr17 | 39506939/G//A  | synonymous    | 0 | 2 |
| CASKIN2   | chr17 | 73500913/C//G  | nonsynonymous | 0 | 2 |
| CHST9     | chr18 | 24722731/G//A  | nonsynonymous | 0 | 2 |
| RTTN      | chr18 | 67860633/G//T  | nonsynonymous | 0 | 2 |
| SCAMP4    | chr19 | 1923078/G//T   | synonymous    | 0 | 2 |
| UNC13A    | chr19 | 17759354/A//C  | nonsynonymous | 0 | 2 |
| DACT3     | chr19 | 47151800/G//A  | nonsynonymous | 0 | 2 |
| KRTAP26-1 | chr21 | 31692123/T//G  | nonsynonymous | 0 | 2 |
| LSS       | chr21 | 47616130/A//T  | nonsynonymous | 0 | 2 |
| LRRIQ3    | chr1  | 74621436/A//C  | nonsynonymous | 0 | 2 |
| PTGFRN    | chr1  | 117527385/C//T | nonsynonymous | 0 | 2 |
| HMCN1     | chr1  | 186055376/A//G | nonsynonymous | 0 | 2 |
| CRB1      | chr1  | 197390123/T//G | synonymous    | 0 | 2 |
| RGS7      | chr1  | 241262053/C//T | nonsynonymous | 0 | 2 |
| TRIM58    | chr1  | 248028085/C//T | nonsynonymous | 0 | 2 |
| C2orf16   | chr2  | 27800019/G//C  | nonsynonymous | 0 | 2 |
| ALMS1     | chr2  | 73675086/T//G  | synonymous    | 0 | 2 |
| DCTN1     | chr2  | 74593117/G//A  | nonsynonymous | 0 | 2 |
| TTN       | chr2  | 179433497/G//C | nonsynonymous | 0 | 2 |
| TTN       | chr2  | 179435825/G//A | nonsynonymous | 0 | 2 |
| ITGAV     | chr2  | 187523864/A//T | nonsynonymous | 0 | 2 |
| ITGAV     | chr2  | 187523871/A//C | nonsynonymous | 0 | 2 |
| COL4A4    | chr2  | 227954648/G//A | synonymous    | 0 | 2 |
| IQCA1     | chr2  | 237240012/T//A | nonsynonymous | 0 | 2 |
| GRM7      | chr3  | 7456740/T//A   | nonsynonymous | 0 | 2 |
| CMTM8     | chr3  | 32409387/C//G  | synonymous    | 0 | 2 |
| ITIH3     | chr3  | 52830583/C//A  | synonymous    | 0 | 2 |
| CLSTN2    | chr3  | 140282886/C//T | nonsynonymous | 0 | 2 |
| TFRC      | chr3  | 195800982/A//T | nonsynonymous | 0 | 2 |
| AMTN      | chr4  | 71398221/G//C  | synonymous    | 0 | 2 |
| ZNF366    | chr5  | 71756620/T//C  | nonsynonymous | 0 | 2 |
| APC       | chr5  | 112174368/A//G | nonsynonymous | 0 | 2 |
| DTWD2     | chr5  | 118183880/C//G | nonsynonymous | 0 | 2 |
| SLC22A5   | chr5  | 131724685/A//T | nonsynonymous | 0 | 2 |
| PCDHGB7   | chr5  | 140799203/G//A | nonsynonymous | 0 | 2 |
| NR3C1     | chr5  | 142779628/A//G | synonymous    | 0 | 2 |
| MAS1L     | chr6  | 29455513/G//A  | nonsynonymous | 0 | 2 |
| ZBTB12    | chr6  | 31867915/C//T  | nonsynonymous | 0 | 2 |
| AGPAT1    | chr6  | 32137096/C//T  | nonsynonymous | 0 | 2 |
| TRERF1    | chr6  | 42196326/C//T  | synonymous    | 0 | 2 |
| HTR1E     | chr6  | 87725542/C//T  | nonsynonymous | 0 | 2 |
| RPS6KA2   | chr6  | 166912105/T//C | nonsynonymous | 0 | 2 |
| AFDN      | chr6  | 168281175/C//G | nonsynonymous | 0 | 2 |
| RAC1      | chr7  | 6442061/A//G   | nonsynonymous | 0 | 2 |
| SRI       | chr7  | 87838768/C//T  | nonsynonymous | 0 | 2 |
| GIGYF1    | chr7  | 100285988/G//A | synonymous    | 0 | 2 |
| RIMS2     | chr8  | 104898096/T//G | synonymous    | 0 | 2 |
| PCSK5     | chr9  | 78953292/C//A  | nonsynonymous | 0 | 2 |
| C9orf170  | chr9  | 89771487/G//T  | nonsynonymous | 0 | 2 |
| TTC16     | chr9  | 130487166/C//T | nonsynonymous | 0 | 2 |
| ZNF239    | chr10 | 44052784/C//T  | synonymous    | 0 | 2 |
| PSAP      | chr10 | 73578875/A//T  | synonymous    | 0 | 2 |
| PTEN      | chr10 | 89685281/C//A  | nonsynonymous | 0 | 2 |
| P2RY2     | chr11 | 72945588/C//T  | synonymous    | 0 | 2 |
| HEPHL1    | chr11 | 93806533/G//A  | nonsynonymous | 0 | 2 |
| TTC12     | chr11 | 113235672/G//C | nonsynonymous | 0 | 2 |
| DRD2      | chr11 | 113287668/C//T | nonsynonymous | 0 | 2 |
| KCNH3     | chr12 | 49942696/C//T  | nonsynonymous | 0 | 2 |
| LRP1      | chr12 | 57559637/C//T  | synonymous    | 0 | 2 |
| MDM1      | chr12 | 68707296/G//C  | nonsynonymous | 0 | 2 |
| KCNC2     | chr12 | 75444245/T//A  | nonsynonymous | 0 | 2 |

|             |       |                |               |   |   |
|-------------|-------|----------------|---------------|---|---|
| EEA1        | chr12 | 93169745/T//G  | synonymous    | 0 | 2 |
| ASCL1       | chr12 | 103352569/G//A | nonsynonymous | 0 | 2 |
| HCFC2       | chr12 | 104458288/C//G | synonymous    | 0 | 2 |
| EPSTI1      | chr13 | 43462531/G//A  | nonsynonymous | 0 | 2 |
| PCDH17      | chr13 | 58207224/G//T  | nonsynonymous | 0 | 2 |
| CCDC168     | chr13 | 103391809/C//G | nonsynonymous | 0 | 2 |
| MCF2L       | chr13 | 113751232/C//T | synonymous    | 0 | 2 |
| VCPKMT      | chr14 | 50579441/T//C  | synonymous    | 0 | 2 |
| HERC2       | chr15 | 28356964/T//C  | nonsynonymous | 0 | 2 |
| MAP1A       | chr15 | 43814768/C//A  | nonsynonymous | 0 | 2 |
| ASB7        | chr15 | 101152555/C//T | nonsynonymous | 0 | 2 |
| N4BP1       | chr16 | 48595715/C//A  | nonsynonymous | 0 | 2 |
| CDH5        | chr16 | 66426126/G//A  | nonsynonymous | 0 | 2 |
| SLC12A4     | chr16 | 67979715/C//T  | synonymous    | 0 | 2 |
| NXN         | chr17 | 722749/C//A    | nonsynonymous | 0 | 2 |
| TP53        | chr17 | 7577559/G//C   | nonsynonymous | 0 | 2 |
| NR1D1       | chr17 | 38256315/A//T  | nonsynonymous | 0 | 2 |
| ACBD4       | chr17 | 43216515/G//A  | nonsynonymous | 0 | 2 |
| PLEKHM1     | chr17 | 43552494/C//T  | nonsynonymous | 0 | 2 |
| SPPL2C      | chr17 | 43924136/T//A  | nonsynonymous | 0 | 2 |
| CACNG5      | chr17 | 64873407/T//C  | synonymous    | 0 | 2 |
| SALL3       | chr18 | 76753806/C//T  | synonymous    | 0 | 2 |
| PPAN-P2RY11 | chr19 | 10225208/C//T  | nonsynonymous | 0 | 2 |
| EPHX3       | chr19 | 15338577/C//T  | synonymous    | 0 | 2 |
| ZNF85       | chr19 | 21132145/C//A  | synonymous    | 0 | 2 |
| GYS1        | chr19 | 49473855/C//T  | nonsynonymous | 0 | 2 |
| GYS1        | chr19 | 49488804/C//T  | nonsynonymous | 0 | 2 |
| SSC5D       | chr19 | 56005278/C//T  | synonymous    | 0 | 2 |
| BPIFB3      | chr20 | 31644469/C//T  | synonymous    | 0 | 2 |
| PCIF1       | chr20 | 44576376/C//T  | synonymous    | 0 | 2 |
| ADAMTS1     | chr21 | 28212796/G//T  | nonsynonymous | 0 | 2 |
| MED15       | chr22 | 20929408/G//A  | synonymous    | 0 | 2 |
| MTMR8       | chrX  | 63557167/C//G  | nonsynonymous | 0 | 2 |
| TBX22       | chrX  | 79281201/A//G  | synonymous    | 0 | 2 |
| MCF2        | chrX  | 138679654/C//A | nonsynonymous | 0 | 2 |
| WDR63       | chr1  | 85592280/C//T  | synonymous    | 0 | 2 |
| COL24A1     | chr1  | 86361567/C//A  | nonsynonymous | 0 | 2 |
| NRAS        | chr1  | 115258748/C//A | nonsynonymous | 0 | 2 |
| AQP10       | chr1  | 154296135/C//T | nonsynonymous | 0 | 2 |
| OR6K3       | chr1  | 158687177/G//T | nonsynonymous | 0 | 2 |
| NCSTN       | chr1  | 160314608/G//A | nonsynonymous | 0 | 2 |
| KCNT2       | chr1  | 196398790/C//T | nonsynonymous | 0 | 2 |
| TIA1        | chr2  | 70475545/G//A  | synonymous    | 0 | 2 |
|             | chr2  | 127818194/G//A | synonymous    | 0 | 2 |
| PDE11A      | chr2  | 178576605/G//C | nonsynonymous | 0 | 2 |
| TTN         | chr2  | 179582456/C//T | nonsynonymous | 0 | 2 |
| LRRC3B      | chr3  | 26751568/C//T  | synonymous    | 0 | 2 |
| PIK3CA      | chr3  | 178916890/C//T | nonsynonymous | 1 | 1 |
| PALLD       | chr4  | 169837147/A//G | nonsynonymous | 0 | 2 |
| IRX1        | chr5  | 3600770/T//A   | nonsynonymous | 0 | 2 |
| PRDM9       | chr5  | 23521146/G//A  | synonymous    | 0 | 2 |
| CDH10       | chr5  | 24537633/G//A  | nonsynonymous | 0 | 2 |
| IL7R        | chr5  | 35876230/G//A  | nonsynonymous | 0 | 2 |
| FCHO2       | chr5  | 72264372/T//C  | synonymous    | 0 | 2 |
| IQGAP2      | chr5  | 75979032/A//G  | synonymous    | 0 | 2 |
|             | chr5  | 96062532/A//G  | synonymous    | 0 | 2 |
| APC         | chr5  | 112116592/C//T | nonsynonymous | 0 | 2 |
| PCDHAC1     | chr5  | 140307011/C//T | synonymous    | 0 | 2 |
| PCDHGB1     | chr5  | 140730646/G//C | nonsynonymous | 0 | 2 |
| PCDHGA6     | chr5  | 140753980/C//T | synonymous    | 0 | 2 |
| HMP19       | chr5  | 173534535/C//T | synonymous    | 0 | 2 |
| MGAT4B      | chr5  | 179225987/G//T | nonsynonymous | 0 | 2 |
| ZNF655      | chr7  | 99169919/C//T  | nonsynonymous | 0 | 2 |
| COL22A1     | chr8  | 139856384/C//T | nonsynonymous | 0 | 2 |
| OR1B1       | chr9  | 125391523/G//A | nonsynonymous | 0 | 2 |
| SVIL        | chr10 | 29788191/C//T  | nonsynonymous | 0 | 2 |
| KNDC1       | chr10 | 135012256/G//A | synonymous    | 0 | 2 |
| OR4S2       | chr11 | 55419095/G//T  | nonsynonymous | 0 | 2 |
| PPP1CA      | chr11 | 67166217/G//A  | synonymous    | 0 | 2 |
| NARS2       | chr11 | 78204159/T//C  | nonsynonymous | 0 | 2 |

|           |       |                 |               |   |   |
|-----------|-------|-----------------|---------------|---|---|
| MMP12     | chr11 | 102738782/G//A  | synonymous    | 0 | 2 |
| KRT4      | chr12 | 53201627/C//T   | nonsynonymous | 0 | 2 |
| KRT18     | chr12 | 53346031/G//A   | synonymous    | 0 | 2 |
| SPRYD4    | chr12 | 56862997/G//GAC | nonsynonymous | 0 | 2 |
| PABPC3    | chr13 | 25670780/C//T   | synonymous    | 0 | 2 |
| TNFSF11   | chr13 | 43175105/G//A   | nonsynonymous | 0 | 2 |
| TRIP11    | chr14 | 92436047/C//T   | synonymous    | 0 | 2 |
| APBA2     | chr15 | 29393892/C//T   | nonsynonymous | 0 | 2 |
| TYRO3     | chr15 | 41870493/C//T   | synonymous    | 0 | 2 |
| CACNA1H   | chr16 | 1252143/G//A    | nonsynonymous | 0 | 2 |
| SRRM2     | chr16 | 2816859/C//T    | synonymous    | 0 | 2 |
| NLRC5     | chr16 | 57080538/T//C   | nonsynonymous | 0 | 2 |
| DHODH     | chr16 | 72055167/G//A   | nonsynonymous | 0 | 2 |
| DBNDD1    | chr16 | 90075763/G//A   | nonsynonymous | 0 | 2 |
| CD300LB   | chr17 | 72522034/G//A   | nonsynonymous | 0 | 2 |
| BAHCC1    | chr17 | 79409742/G//T   | nonsynonymous | 0 | 2 |
| SMARCA4   | chr19 | 11107001/G//A   | nonsynonymous | 0 | 2 |
| FAM71E2   | chr19 | 55869791/C//T   | synonymous    | 0 | 2 |
| ZNF135    | chr19 | 58573033/G//A   | nonsynonymous | 0 | 2 |
| ID1       | chr20 | 30193900/C//G   | synonymous    | 0 | 2 |
| PI4KA     | chr22 | 21105965/G//A   | synonymous    | 0 | 2 |
| TBL1X     | chrX  | 9673116/G//A    | nonsynonymous | 0 | 2 |
| FAM47A    | chrX  | 34149053/C//T   | nonsynonymous | 0 | 2 |
| AMER1     | chrX  | 63411857/AT//A  | nonsynonymous | 0 | 2 |
| CXorf57   | chrX  | 105905472/C//G  | nonsynonymous | 0 | 2 |
| CDC27     | chr17 | 45214682/A//G   | synonymous    | 0 | 2 |
| CDC27     | chr17 | 45249306/T//C   | synonymous    | 0 | 2 |
| CNN2      | chr19 | 1037718/G//T    | nonsynonymous | 1 | 1 |
| CNN2      | chr19 | 1037731/C//T    | synonymous    | 1 | 1 |
| CELSR2    | chr1  | 109806825/C//T  | synonymous    | 0 | 2 |
| CFAP45    | chr1  | 159846370/C//T  | nonsynonymous | 0 | 2 |
| NHLH1     | chr1  | 160340950/C//A  | synonymous    | 0 | 2 |
| TBC1D8    | chr2  | 101624566/T//A  | nonsynonymous | 0 | 2 |
| EFCC1     | chr3  | 128757682/G//A  | synonymous    | 0 | 2 |
| AGTR1     | chr3  | 148458855/T//C  | synonymous    | 0 | 2 |
| SELENOT   | chr3  | 150340945/C//T  | nonsynonymous | 0 | 2 |
| UTS2B     | chr3  | 190993079/G//A  | nonsynonymous | 0 | 2 |
| COL25A1   | chr4  | 110223192/G//A  | synonymous    | 0 | 2 |
| CDH12     | chr5  | 21854778/A//G   | nonsynonymous | 0 | 2 |
| ELOVL7    | chr5  | 60050429/G//A   | synonymous    | 0 | 2 |
| LHFPL2    | chr5  | 77806035/A//G   | nonsynonymous | 0 | 2 |
| PCDHGA11  | chr5  | 140802666/G//A  | synonymous    | 0 | 2 |
| PTCHD4    | chr6  | 47846507/G//A   | synonymous    | 0 | 2 |
| GINM1     | chr6  | 149903738/A//C  | nonsynonymous | 0 | 2 |
| GRID2IP   | chr7  | 6590937/C//T    | nonsynonymous | 0 | 2 |
| ABC8      | chr7  | 150739194/C//T  | synonymous    | 0 | 2 |
| FAM135B   | chr8  | 139180201/C//T  | nonsynonymous | 0 | 2 |
| KDM4C     | chr9  | 6849705/G//A    | synonymous    | 0 | 2 |
| FRMPD1    | chr9  | 37740243/C//G   | nonsynonymous | 0 | 2 |
| SPATA31C2 | chr9  | 90745960/C//A   | nonsynonymous | 0 | 2 |
| EBF3      | chr10 | 131640527/C//T  | nonsynonymous | 0 | 2 |
| CYB5R2    | chr11 | 7690492/A//C    | nonsynonymous | 0 | 2 |
| ALKBH8    | chr11 | 107420502/C//T  | nonsynonymous | 0 | 2 |
| UCHL3     | chr13 | 76143602/C//T   | nonsynonymous | 0 | 2 |
| ACSM5     | chr16 | 20451694/C//T   | nonsynonymous | 0 | 2 |
| ZP2       | chr16 | 21210898/G//T   | nonsynonymous | 0 | 2 |
| LOXHD1    | chr18 | 44184136/C//A   | nonsynonymous | 0 | 2 |
| MYO1F     | chr19 | 8604901/C//T    | nonsynonymous | 0 | 2 |
| VSTM2B    | chr19 | 30020879/C//T   | nonsynonymous | 0 | 2 |
| BCAS1     | chr20 | 52561412/G//C   | synonymous    | 0 | 2 |
| OSBP2     | chr22 | 31289934/A//T   | nonsynonymous | 0 | 2 |
| PRR14L    | chr22 | 32108310/G//A   | nonsynonymous | 0 | 2 |
| ATP7A     | chrX  | 77245039/C//T   | synonymous    | 0 | 2 |
| CAMTA1    | chr1  | 7797372/C//T    | nonsynonymous | 0 | 2 |
| MTOR      | chr1  | 11174416/G//A   | nonsynonymous | 0 | 2 |
| CROCC     | chr1  | 17281249/G//A   | synonymous    | 0 | 2 |
| ARID1A    | chr1  | 27087516/C//T   | nonsynonymous | 0 | 2 |
| CCDC18    | chr1  | 93701915/G//A   | synonymous    | 0 | 2 |
| CHRN2     | chr1  | 154544383/C//T  | nonsynonymous | 0 | 2 |
| APCS      | chr1  | 15955776/G//T   | nonsynonymous | 0 | 2 |

|          |       |                 |               |   |   |
|----------|-------|-----------------|---------------|---|---|
| C4BPA    | chr1  | 207288790/C//T  | nonsynonymous | 0 | 2 |
| TRAF5    | chr1  | 211534505/G//A  | nonsynonymous | 0 | 2 |
| HEATR5B  | chr2  | 37310477/A//G   | synonymous    | 0 | 2 |
| MAP4K4   | chr2  | 102486762/C//G  | nonsynonymous | 0 | 2 |
| GYPC     | chr2  | 127453576/G//A  | nonsynonymous | 0 | 2 |
| CCDC74B  | chr2  | 130897828/C//T  | nonsynonymous | 0 | 2 |
| WDR12    | chr2  | 203764258/C//T  | nonsynonymous | 0 | 2 |
| KIAA1143 | chr3  | 44803099/G//A   | synonymous    | 0 | 2 |
| CACNA2D2 | chr3  | 50413083/A//G   | synonymous    | 0 | 2 |
| ROBO2    | chr3  | 77147197/C//T   | nonsynonymous | 0 | 2 |
| IFT57    | chr3  | 107910402/G//A  | nonsynonymous | 0 | 2 |
| BCHE     | chr3  | 165491137/G//T  | synonymous    | 0 | 2 |
| ZBBX     | chr3  | 167035292/G//A  | synonymous    | 0 | 2 |
| ZNF732   | chr4  | 264929/G//C     | nonsynonymous | 0 | 2 |
| ENAM     | chr4  | 71509947/G//T   | nonsynonymous | 0 | 2 |
| HERC5    | chr4  | 89391766/G//A   | nonsynonymous | 0 | 2 |
| FAT4     | chr4  | 126373819/G//A  | nonsynonymous | 0 | 2 |
| FAT4     | chr4  | 126412778/T//A  | nonsynonymous | 0 | 2 |
| ADAMTS16 | chr5  | 5303830/G//A    | nonsynonymous | 0 | 2 |
| TRIO     | chr5  | 14304606/G//A   | nonsynonymous | 0 | 2 |
| LIFR     | chr5  | 38506646/C//T   | synonymous    | 0 | 2 |
| HCN1     | chr5  | 45262694/A//C   | nonsynonymous | 0 | 2 |
| APC      | chr5  | 112175231/AG//A | nonsynonymous | 0 | 2 |
| PCDHB2   | chr5  | 140475774/G//T  | nonsynonymous | 0 | 2 |
| PCDHB2   | chr5  | 140476594/C//T  | synonymous    | 0 | 2 |
| AGER     | chr6  | 32149150/G//A   | nonsynonymous | 0 | 2 |
| GTPBP2   | chr6  | 43589794/T//C   | synonymous    | 0 | 2 |
| MCM3     | chr6  | 52132742/T//C   | nonsynonymous | 0 | 2 |
| TIAM2    | chr6  | 155500564/C//T  | nonsynonymous | 0 | 2 |
| ZNF107   | chr7  | 64167325/C//A   | nonsynonymous | 0 | 2 |
| BRAF     | chr7  | 140453193/T//A  | nonsynonymous | 0 | 2 |
| SNAI2    | chr8  | 49833898/C//T   | synonymous    | 0 | 2 |
| RPS20    | chr8  | 56985664/G//A   | synonymous    | 0 | 2 |
| PSKH2    | chr8  | 87081758/C//T   | nonsynonymous | 0 | 2 |
| CSMD3    | chr8  | 113347667/C//T  | synonymous    | 0 | 2 |
| DENND3   | chr8  | 142161840/C//T  | synonymous    | 0 | 2 |
| FAM205A  | chr9  | 34723338/C//T   | nonsynonymous | 0 | 2 |
| GABBR2   | chr9  | 101156497/G//A  | synonymous    | 0 | 2 |
| OR10A3   | chr11 | 7960939/G//C    | synonymous    | 0 | 2 |
| NAV2     | chr11 | 20127136/G//A   | nonsynonymous | 0 | 2 |
| CXCR5    | chr11 | 118765145/G//A  | nonsynonymous | 0 | 2 |
| CASC1    | chr12 | 25272197/C//T   | synonymous    | 0 | 2 |
| KRAS     | chr12 | 25378561/G//A   | nonsynonymous | 0 | 2 |
| WNT10B   | chr12 | 49360032/C//T   | nonsynonymous | 0 | 2 |
| NAV3     | chr12 | 78400656/G//T   | nonsynonymous | 0 | 2 |
| ATP2B1   | chr12 | 90015397/T//C   | nonsynonymous | 0 | 2 |
| AMDHD1   | chr12 | 96346520/C//T   | nonsynonymous | 0 | 2 |
| EP400    | chr12 | 132464291/C//T  | nonsynonymous | 0 | 2 |
| SLITRK1  | chr13 | 84454159/G//A   | nonsynonymous | 0 | 2 |
| RPL10L   | chr14 | 47120869/C//T   | nonsynonymous | 0 | 2 |
| NRDE2    | chr14 | 90770394/T//C   | nonsynonymous | 0 | 2 |
| EML1     | chr14 | 100387183/C//T  | synonymous    | 0 | 2 |
| TBL3     | chr16 | 2024079/G//C    | nonsynonymous | 0 | 2 |
| DCUN1D3  | chr16 | 20873571/C//T   | nonsynonymous | 0 | 2 |
| IGSF6    | chr16 | 21652814/G//A   | synonymous    | 0 | 2 |
|          | chr16 | 27414458/C//T   | synonymous    | 0 | 2 |
| SRCAP    | chr16 | 30735763/C//T   | nonsynonymous | 0 | 2 |
| PKD1L3   | chr16 | 71981428/C//A   | nonsynonymous | 0 | 2 |
| TP53     | chr17 | 7578493/C//T    | nonsynonymous | 0 | 2 |
| NOG      | chr17 | 54672334/C//T   | synonymous    | 0 | 2 |
| SOX9     | chr17 | 70117888/C//T   | nonsynonymous | 0 | 2 |
| MUC16    | chr19 | 9072560/G//T    | synonymous    | 0 | 2 |
| PNKP     | chr19 | 50365820/TTC//T | nonsynonymous | 0 | 2 |
| PCSK2    | chr20 | 17434451/G//A   | nonsynonymous | 0 | 2 |
| PYGB     | chr20 | 25259713/C//A   | nonsynonymous | 0 | 2 |
| BPIFB3   | chr20 | 31644455/G//A   | nonsynonymous | 0 | 2 |
| PHACTR3  | chr20 | 58318189/G//A   | nonsynonymous | 0 | 2 |
| CXorf57  | chrX  | 105876238/C//T  | nonsynonymous | 0 | 2 |
| MTOR     | chr1  | 11190804/C//T   | nonsynonymous | 0 | 2 |
| PTPRU    | chr1  | 29649988/C//T   | nonsynonymous | 0 | 2 |

|          |       |                   |               |   |   |
|----------|-------|-------------------|---------------|---|---|
| CCDC30   | chr1  | 43119549/G//T     | nonsynonymous | 0 | 2 |
| RAB3B    | chr1  | 52385726/C//T     | nonsynonymous | 0 | 2 |
| USH2A    | chr1  | 216373317/T//G    | nonsynonymous | 0 | 2 |
|          | chr1  | 228547794/C//T    | synonymous    | 0 | 2 |
| DNMT3A   | chr2  | 25467072/C//T     | nonsynonymous | 0 | 2 |
| SLC8A1   | chr2  | 40366572/G//A     | synonymous    | 0 | 2 |
| FER1L5   | chr2  | 97364418/G//A     | nonsynonymous | 0 | 2 |
| RANBP2   | chr2  | 109384577/G//C    | nonsynonymous | 0 | 2 |
| KCNH7    | chr2  | 163241412/G//A    | synonymous    | 0 | 2 |
| LRP2     | chr2  | 170145603/C//T    | synonymous    | 0 | 2 |
| TTN      | chr2  | 179599566/G//A    | nonsynonymous | 0 | 2 |
|          | chr2  | 179611639/C//T    | synonymous    | 0 | 2 |
| ERBB4    | chr2  | 212812202/T//A    | nonsynonymous | 0 | 2 |
| ABCA12   | chr2  | 215820002/T//C    | nonsynonymous | 0 | 2 |
| EPHA4    | chr2  | 222291194/C//T    | nonsynonymous | 0 | 2 |
| KIF1A    | chr2  | 241697789/C//T    | nonsynonymous | 0 | 2 |
| SLC10A6  | chr4  | 87749282/C//T     | nonsynonymous | 0 | 2 |
| ARFIP1   | chr4  | 153809339/T//C    | synonymous    | 0 | 2 |
| CTNND2   | chr5  | 11346540/C//T     | synonymous    | 0 | 2 |
| DNAH5    | chr5  | 13717534/G//A     | nonsynonymous | 0 | 2 |
| DNAH5    | chr5  | 13839564/G//C     | nonsynonymous | 0 | 2 |
| APC      | chr5  | 112155040/AAGT//A | nonsynonymous | 0 | 2 |
| APC      | chr5  | 112173968/G//T    | nonsynonymous | 0 | 2 |
| ARL14EPL | chr5  | 115389771/G//A    | nonsynonymous | 0 | 2 |
| KIF20A   | chr5  | 137521396/G//A    | nonsynonymous | 0 | 2 |
| PCDHGA8  | chr5  | 140774290/C//T    | nonsynonymous | 0 | 2 |
|          | chr5  | 172660466/C//A    | synonymous    | 0 | 2 |
| GRM6     | chr5  | 178408780/G//A    | nonsynonymous | 0 | 2 |
| TNXB     | chr6  | 32016215/G//T     | nonsynonymous | 0 | 2 |
| GPR31    | chr6  | 167570915/C//T    | synonymous    | 0 | 2 |
| NPC1L1   | chr7  | 44556399/T//C     | nonsynonymous | 0 | 2 |
| ZNF107   | chr7  | 64166886/G//A     | synonymous    | 0 | 2 |
| SSPO     | chr7  | 149474914/G//A    | nonsynonymous | 0 | 2 |
| FGFR1    | chr8  | 38273515/C//T     | nonsynonymous | 0 | 2 |
| C8orf89  | chr8  | 74153697/G//A     | nonsynonymous | 0 | 2 |
| ABRA     | chr8  | 107782026/G//A    | synonymous    | 0 | 2 |
| ADCY8    | chr8  | 131922058/G//A    | synonymous    | 0 | 2 |
| LHX3     | chr9  | 139092585/C//A    | nonsynonymous | 0 | 2 |
| RPP30    | chr10 | 92654596/G//A     | nonsynonymous | 0 | 2 |
| KRTAP5-3 | chr11 | 1628975/C//T      | nonsynonymous | 0 | 2 |
| HBB      | chr11 | 5248007/TC//T     | nonsynonymous | 0 | 2 |
| HBB      | chr11 | 5248009/C//A      | nonsynonymous | 0 | 2 |
| CCDC34   | chr11 | 27360530/C//T     | synonymous    | 0 | 2 |
| SLCO1B1  | chr12 | 21325669/G//A     | nonsynonymous | 0 | 2 |
| ARNTL2   | chr12 | 27571069/C//T     | synonymous    | 0 | 2 |
| HOXC11   | chr12 | 54367314/G//A     | nonsynonymous | 0 | 2 |
| CDK4     | chr12 | 58143021/G//A     | nonsynonymous | 0 | 2 |
| PLXNC1   | chr12 | 94641708/C//T     | synonymous    | 0 | 2 |
| SLC41A2  | chr12 | 105255075/T//C    | nonsynonymous | 0 | 2 |
| PCCA     | chr13 | 100953799/A//G    | nonsynonymous | 0 | 2 |
| CHAMP1   | chr13 | 115090859/C//G    | nonsynonymous | 0 | 2 |
| SYNE2    | chr14 | 64554536/A//G     | nonsynonymous | 0 | 2 |
| SYNE3    | chr14 | 95899734/G//A     | nonsynonymous | 0 | 2 |
| TLN2     | chr15 | 63055872/C//T     | nonsynonymous | 0 | 2 |
| NEO1     | chr15 | 73593699/C//T     | synonymous    | 0 | 2 |
| RAB40C   | chr16 | 677687/C//T       | synonymous    | 0 | 2 |
| HYDIN    | chr16 | 70937972/G//T     | synonymous    | 0 | 2 |
| PRPF8    | chr17 | 1584915/C//T      | synonymous    | 0 | 2 |
| TP53     | chr17 | 7578403/C//A      | nonsynonymous | 0 | 2 |
| SETBP1   | chr18 | 42531573/G//C     | synonymous    | 0 | 2 |
| MED16    | chr19 | 891134/G//A       | synonymous    | 0 | 2 |
| C3       | chr19 | 6697381/C//T      | nonsynonymous | 0 | 2 |
| ZNF560   | chr19 | 9577403/A//G      | synonymous    | 0 | 2 |
| FIZ1     | chr19 | 56104205/C//T     | nonsynonymous | 0 | 2 |
| NAA20    | chr20 | 20007498/C//T     | synonymous    | 0 | 2 |
| CSF2RB   | chr22 | 37319384/G//A     | nonsynonymous | 0 | 2 |
| EFHC2    | chrX  | 44101415/T//A     | nonsynonymous | 0 | 2 |
| GUCY2F   | chrX  | 108628457/C//G    | nonsynonymous | 0 | 2 |
| ALG13    | chrX  | 110961403/C//T    | nonsynonymous | 0 | 2 |
| PRR32    | chrX  | 125955050/C//A    | synonymous    | 0 | 2 |

|          |       |                          |               |   |   |
|----------|-------|--------------------------|---------------|---|---|
| EXTL1    | chr1  | 26357056/AGTGGAGAAGGTCAT | nonsynonymous | 0 | 2 |
| KTI12    | chr1  | 52498620/G//A            | nonsynonymous | 0 | 2 |
| PYHIN1   | chr1  | 158913731/T//C           | nonsynonymous | 0 | 2 |
| MRPL55   | chr1  | 228295398/G//A           | nonsynonymous | 0 | 2 |
| NYAP2    | chr2  | 226447267/G//A           | synonymous    | 0 | 2 |
| ARL8B    | chr3  | 5164236/A//G             | nonsynonymous | 0 | 2 |
| WFS1     | chr4  | 6303707/G//A             | nonsynonymous | 0 | 2 |
| DNAH5    | chr5  | 13771075/G//T            | nonsynonymous | 0 | 2 |
| PCDHA11  | chr5  | 140248958/C//T           | synonymous    | 0 | 2 |
| MUC17    | chr7  | 100681310/T//G           | nonsynonymous | 0 | 2 |
| CNBD1    | chr8  | 87878734/C//A            | nonsynonymous | 0 | 2 |
| PKD2L1   | chr10 | 102057297/G//A           | synonymous    | 0 | 2 |
| MUC6     | chr11 | 1017596/T//G             | nonsynonymous | 0 | 2 |
| UBQLN3   | chr11 | 5529277/C//T             | synonymous    | 0 | 2 |
| LATS2    | chr13 | 21562902/G//A            | synonymous    | 0 | 2 |
| PPP1R36  | chr14 | 65054003/G//A            | nonsynonymous | 0 | 2 |
| THSD4    | chr15 | 72063436/C//T            | nonsynonymous | 0 | 2 |
| IGF1R    | chr15 | 99434645/C//T            | synonymous    | 0 | 2 |
| ZFH3     | chr16 | 72827200/C//T            | synonymous    | 0 | 2 |
| TP53     | chr17 | 7578280/G//A             | nonsynonymous | 0 | 2 |
| PIAS4    | chr19 | 4028729/C//T             | synonymous    | 0 | 2 |
| TUBB4A   | chr19 | 6495439/C//T             | synonymous    | 0 | 2 |
| CST2     | chr20 | 23807165/G//A            | nonsynonymous | 0 | 2 |
| ARHGAP40 | chr20 | 37266370/G//T            | synonymous    | 0 | 2 |
| TXNRD2   | chr22 | 19882966/C//T            | nonsynonymous | 0 | 2 |
| RRP7A    | chr22 | 42910123/C//T            | nonsynonymous | 0 | 2 |
| MAGEB3   | chrX  | 30254946/C//T            | nonsynonymous | 0 | 2 |
| EIF4G3   | chr1  | 21183906/T//C            | nonsynonymous | 0 | 2 |
| SPTA1    | chr1  | 158615071/T//C           | synonymous    | 0 | 2 |
| SELP     | chr1  | 169562858/G//A           | nonsynonymous | 0 | 2 |
| ZNF2     | chr2  | 95847186/C//T            | nonsynonymous | 0 | 2 |
| TTN      | chr2  | 179430920/G//A           | nonsynonymous | 0 | 2 |
| ZNF804A  | chr2  | 185802272/A//G           | nonsynonymous | 0 | 2 |
| SLC16A14 | chr2  | 230911062/G//A           | synonymous    | 0 | 2 |
| HRH1     | chr3  | 11300877/G//A            | nonsynonymous | 0 | 2 |
| STXBPL   | chr3  | 120973858/A//G           | nonsynonymous | 0 | 2 |
| DNAH5    | chr5  | 13810276/G//A            | nonsynonymous | 0 | 2 |
| APC      | chr5  | 112173299/A//T           | nonsynonymous | 0 | 2 |
| REEP2    | chr5  | 137780550/C//T           | synonymous    | 0 | 2 |
| PCDHA12  | chr5  | 140257073/C//T           | synonymous    | 0 | 2 |
| NOP16    | chr5  | 175811323/C//T           | nonsynonymous | 0 | 2 |
| DBN1     | chr5  | 176894484/C//T           | nonsynonymous | 0 | 2 |
| TUBB2A   | chr6  | 3154768/C//T             | nonsynonymous | 0 | 2 |
| HIVEP2   | chr6  | 143094845/T//C           | nonsynonymous | 0 | 2 |
| SCRN1    | chr7  | 29980495/G//T            | synonymous    | 0 | 2 |
| PXDNL    | chr8  | 52321298/G//A            | synonymous    | 0 | 2 |
| FBXO43   | chr8  | 101153061/T//G           | nonsynonymous | 0 | 2 |
| FBXO43   | chr8  | 101153070/T//C           | nonsynonymous | 0 | 2 |
| S1PR3    | chr9  | 91617087/C//T            | synonymous    | 0 | 2 |
| NFIL3    | chr9  | 94171857/T//C            | nonsynonymous | 0 | 2 |
| ZNF618   | chr9  | 116750814/C//T           | synonymous    | 0 | 2 |
| SFMBT2   | chr10 | 7213976/C//T             | nonsynonymous | 0 | 2 |
| CELF2    | chr10 | 11259384/G//A            | synonymous    | 0 | 2 |
| GAD2     | chr10 | 26559562/C//T            | synonymous    | 0 | 2 |
| KNDC1    | chr10 | 135015124/C//A           | nonsynonymous | 0 | 2 |
| MUC5B    | chr11 | 1263797/C//G             | nonsynonymous | 0 | 2 |
| UBQLN3   | chr11 | 5530063/A//C             | nonsynonymous | 0 | 2 |
| OR56A3   | chr11 | 5969113/G//T             | nonsynonymous | 0 | 2 |
| EXPH5    | chr11 | 108380424/C//T           | nonsynonymous | 0 | 2 |
| OR9K2    | chr12 | 55524135/G//A            | nonsynonymous | 0 | 2 |
| SHMT2    | chr12 | 57627809/C//T            | nonsynonymous | 0 | 2 |
| SACS     | chr13 | 23909025/C//T            | nonsynonymous | 0 | 2 |
| HSPH1    | chr13 | 31711307/T//A            | synonymous    | 0 | 2 |
| LRCH1    | chr13 | 47286716/C//T            | synonymous    | 0 | 2 |
| SIN3A    | chr15 | 75705361/G//A            | nonsynonymous | 0 | 2 |
| KIF7     | chr15 | 90191935/C//T            | nonsynonymous | 0 | 2 |
| FURIN    | chr15 | 91418815/C//T            | synonymous    | 0 | 2 |
| AMDHD2   | chr16 | 2578553/C//T             | synonymous    | 0 | 2 |
| TP53     | chr17 | 7577547/C//A             | nonsynonymous | 0 | 2 |
| SMARCE1  | chr17 | 38801843/G//A            | synonymous    | 0 | 2 |

|              |       |                |               |   |   |
|--------------|-------|----------------|---------------|---|---|
| FBF1         | chr17 | 73906853/A//G  | nonsynonymous | 0 | 2 |
| FASN         | chr17 | 80044989/G//A  | nonsynonymous | 0 | 2 |
| IZUMO4       | chr19 | 2097444/G//A   | nonsynonymous | 0 | 2 |
| TLE6         | chr19 | 2995011/G//A   | synonymous    | 0 | 2 |
| ZFR2         | chr19 | 3810779/C//T   | nonsynonymous | 0 | 2 |
| PGLYRP2      | chr19 | 15586552/C//G  | nonsynonymous | 0 | 2 |
| USHBP1       | chr19 | 17361222/C//T  | nonsynonymous | 0 | 2 |
| ATP1A3       | chr19 | 42490359/G//A  | nonsynonymous | 0 | 2 |
| DIDO1        | chr20 | 61512103/C//T  | synonymous    | 0 | 2 |
| FTCD         | chr21 | 47558513/G//A  | nonsynonymous | 0 | 2 |
| SDF2L1       | chr22 | 21997210/C//A  | synonymous    | 0 | 2 |
| PRAME        | chr22 | 22892383/C//A  | nonsynonymous | 0 | 2 |
| ITIH6        | chrX  | 54777579/C//T  | nonsynonymous | 0 | 2 |
| DCAF12L2     | chrX  | 125298954/C//A | nonsynonymous | 0 | 2 |
| MAMLD1       | chrX  | 149680307/G//A | synonymous    | 0 | 2 |
| PSEN2        | chr1  | 227081727/C//T | synonymous    | 0 | 1 |
| OBSCN        | chr1  | 228528254/G//A | synonymous    | 0 | 1 |
| LRP1B        | chr2  | 141812733/G//A | nonsynonymous | 0 | 1 |
| NEB          | chr2  | 152586136/G//A | nonsynonymous | 0 | 1 |
| G6PC2        | chr2  | 169764299/G//A | nonsynonymous | 0 | 1 |
| HDAC4        | chr2  | 239975273/C//A | nonsynonymous | 0 | 1 |
| SEC22A       | chr3  | 122928222/T//C | nonsynonymous | 0 | 1 |
| IGSF10       | chr3  | 151165674/G//A | nonsynonymous | 0 | 1 |
| ACTL6A       | chr3  | 179287636/A//G | nonsynonymous | 0 | 1 |
| LIFR         | chr5  | 38481718/A//G  | synonymous    | 0 | 1 |
| PCDHA7       | chr5  | 140216232/G//A | nonsynonymous | 0 | 1 |
| NMUR2        | chr5  | 151784383/C//A | nonsynonymous | 0 | 1 |
| PFDN6        | chr6  | 33258189/C//G  | synonymous    | 0 | 1 |
| IFNGR1       | chr6  | 137519225/G//A | synonymous    | 0 | 1 |
| WBSCR17      | chr7  | 71142212/C//A  | nonsynonymous | 0 | 1 |
| DPP6         | chr7  | 154681011/G//A | synonymous    | 0 | 1 |
| CCDC166      | chr8  | 144789995/G//A | synonymous    | 0 | 1 |
| LOC100128593 | chr9  | 139642803/G//A | synonymous    | 0 | 1 |
| NRP1         | chr10 | 33469287/G//A  | nonsynonymous | 0 | 1 |
| MUC5B        | chr11 | 1269741/C//G   | synonymous    | 0 | 1 |
| SLC22A8      | chr11 | 62763203/C//T  | nonsynonymous | 0 | 1 |
| MAP3K11      | chr11 | 65366953/C//A  | synonymous    | 0 | 1 |
| FAT3         | chr11 | 92534306/C//A  | synonymous    | 0 | 1 |
| APOA5        | chr11 | 116661270/A//G | synonymous    | 0 | 1 |
| UBASH3B      | chr11 | 122647787/G//A | nonsynonymous | 0 | 1 |
| WNT10B       | chr12 | 49359825/A//G  | synonymous    | 0 | 1 |
| SVOP         | chr12 | 109372444/G//A | synonymous    | 0 | 1 |
| SLITRK5      | chr13 | 88328265/C//T  | nonsynonymous | 0 | 1 |
| CCDC168      | chr13 | 103395705/T//A | nonsynonymous | 0 | 1 |
|              | chr14 | 24836123/G//C  | synonymous    | 0 | 1 |
| RALGAPA1     | chr14 | 36017715/T//C  | synonymous    | 0 | 1 |
| RYR3         | chr15 | 34021138/G//A  | nonsynonymous | 0 | 1 |
| POLG         | chr15 | 89864150/C//T  | nonsynonymous | 0 | 1 |
| NFATC2IP     | chr16 | 28962559/C//G  | nonsynonymous | 0 | 1 |
| FUS          | chr16 | 31202389/G//A  | nonsynonymous | 0 | 1 |
| STAC2        | chr17 | 37381740/C//T  | nonsynonymous | 0 | 1 |
| SMAD4        | chr18 | 48604722/G//C  | nonsynonymous | 0 | 1 |
| ZNF14        | chr19 | 19822629/G//T  | synonymous    | 0 | 1 |
| ASXL1        | chr20 | 31023270/A//AT | nonsynonymous | 0 | 1 |
| EMILIN3      | chr20 | 39990789/C//T  | nonsynonymous | 0 | 1 |
| KRTAP10-3    | chr21 | 45977975/G//A  | synonymous    | 0 | 1 |
| HPS4         | chr22 | 26879765/C//T  | synonymous    | 0 | 1 |
| ABCB7        | chrX  | 74295352/G//A  | nonsynonymous | 0 | 1 |
| TTC13        | chr1  | 231067545/G//C | synonymous    | 0 | 1 |
| USP53        | chr4  | 120212345/G//A | synonymous    | 0 | 1 |
| PCDHB2       | chr5  | 140474438/T//G | nonsynonymous | 0 | 1 |
| ABCC10       | chr6  | 43412666/G//C  | nonsynonymous | 0 | 1 |
| CNR1         | chr6  | 88854928/G//A  | synonymous    | 0 | 1 |
| SP4          | chr7  | 21468417/G//A  | synonymous    | 0 | 1 |
| ENTPD4       | chr8  | 23294634/C//T  | nonsynonymous | 0 | 1 |
| VPS13A       | chr9  | 79954834/G//T  | synonymous    | 0 | 1 |
| KIAA0368     | chr9  | 114135524/A//C | synonymous    | 0 | 1 |
| OR5D16       | chr11 | 55606482/G//A  | synonymous    | 0 | 1 |
| SENP1        | chr12 | 48491856/T//C  | nonsynonymous | 0 | 1 |
| CLDN9        | chr16 | 3064074/G//C   | synonymous    | 0 | 1 |



|           |       |                     |               |   |   |
|-----------|-------|---------------------|---------------|---|---|
| KRTAP4-2  | chr17 | 39334186/A//G       | synonymous    | 0 | 1 |
| MRC2      | chr17 | 60769840/G//A       | synonymous    | 0 | 1 |
| ZNF407    | chr18 | 72345941/A//G       | nonsynonymous | 0 | 1 |
| ZNF559    | chr19 | 9452431/G//C        | nonsynonymous | 0 | 1 |
| ZNF729    | chr19 | 22498764/A//G       | nonsynonymous | 0 | 1 |
|           | chr19 | 40903992/G//A       | synonymous    | 0 | 1 |
| CXorf36   | chrX  | 45059975/G//T       | nonsynonymous | 0 | 1 |
| ZBTB17    | chr1  | 16274878/T//C       | nonsynonymous | 1 | 0 |
| ZSCAN20   | chr1  | 33960621/C//T       | nonsynonymous | 1 | 0 |
| KIAA0319L | chr1  | 35900476/G//A       | synonymous    | 1 | 0 |
| ZFP69     | chr1  | 40945115/G//A       | nonsynonymous | 1 | 0 |
| SLFNL1    | chr1  | 41483014/C//T       | synonymous    | 1 | 0 |
| OSBPL9    | chr1  | 52242576/G//T       | synonymous    | 1 | 0 |
| SNX7      | chr1  | 99225611/G//T       | nonsynonymous | 1 | 0 |
| OLFML2B   | chr1  | 161987210/GCCCCA//G | nonsynonymous | 1 | 0 |
| CFH       | chr1  | 196646684/A//G      | nonsynonymous | 1 | 0 |
| FAM84A    | chr2  | 14774371/C//T       | nonsynonymous | 1 | 0 |
| APOB      | chr2  | 21237377/T//C       | nonsynonymous | 1 | 0 |
| FAM179A   | chr2  | 29274661/T//C       | nonsynonymous | 1 | 0 |
| LRP1B     | chr2  | 141083397/G//T      | nonsynonymous | 1 | 0 |
| TANC1     | chr2  | 160075763/G//C      | synonymous    | 1 | 0 |
| DNAH7     | chr2  | 196729006/A//G      | nonsynonymous | 1 | 0 |
| MARCH4    | chr2  | 217123959/G//C      | synonymous    | 1 | 0 |
| CHL1      | chr3  | 401981/G//A         | nonsynonymous | 1 | 0 |
| EXOSC7    | chr3  | 45046796/C//T       | nonsynonymous | 1 | 0 |
| CADPS     | chr3  | 62518545/C//A       | nonsynonymous | 1 | 0 |
| UBA3      | chr3  | 69111006/G//A       | nonsynonymous | 1 | 0 |
| PARP14    | chr3  | 122432731/C//T      | nonsynonymous | 1 | 0 |
| DZIP1L    | chr3  | 137813808/C//T      | nonsynonymous | 1 | 0 |
| VWA5B2    | chr3  | 183957713/G//C      | nonsynonymous | 1 | 0 |
| NUDT9     | chr4  | 88375539/T//C       | nonsynonymous | 1 | 0 |
| FAT1      | chr4  | 187549345/T//A      | nonsynonymous | 1 | 0 |
| CDH10     | chr5  | 24511534/C//T       | nonsynonymous | 1 | 0 |
| ANKHD1    | chr5  | 139865214/A//T      | nonsynonymous | 1 | 0 |
| NOP16     | chr5  | 175815488/T//C      | nonsynonymous | 1 | 0 |
| ZFP2      | chr5  | 178358703/A//G      | nonsynonymous | 1 | 0 |
| PKHD1     | chr6  | 51941108/G//A       | synonymous    | 1 | 0 |
| KLHL31    | chr6  | 53519033/G//C       | nonsynonymous | 1 | 0 |
| TINAG     | chr6  | 54219323/T//C       | nonsynonymous | 1 | 0 |
| HDAC2     | chr6  | 114262214/T//A      | synonymous    | 1 | 0 |
| DSE       | chr6  | 116720628/C//T      | nonsynonymous | 1 | 0 |
| EEPD1     | chr7  | 36324333/C//T       | synonymous    | 1 | 0 |
| EGFR      | chr7  | 55241707/G//A       | nonsynonymous | 1 | 0 |
| EGFR      | chr7  | 55249005/G//T       | nonsynonymous | 1 | 0 |
| CAPZA2    | chr7  | 116557787/A//G      | nonsynonymous | 1 | 0 |
| FLNC      | chr7  | 128483276/C//T      | synonymous    | 1 | 0 |
| CSMD1     | chr8  | 3165982/G//A        | synonymous    | 1 | 0 |
| PROSC     | chr8  | 37632969/T//A       | nonsynonymous | 1 | 0 |
| MTERF3    | chr8  | 97269291/T//C       | nonsynonymous | 1 | 0 |
| ZNF251    | chr8  | 145948076/A//AG     | nonsynonymous | 1 | 0 |
| ADAMTSL1  | chr9  | 18706827/C//T       | synonymous    | 1 | 0 |
| ANK3      | chr10 | 61965627/T//C       | nonsynonymous | 1 | 0 |
| CFAP46    | chr10 | 134664793/G//A      | nonsynonymous | 1 | 0 |
| TRPM5     | chr11 | 2436631/A//G        | nonsynonymous | 1 | 0 |
| RAG1      | chr11 | 36595433/G//C       | nonsynonymous | 1 | 0 |
| PKNOX2    | chr11 | 125299970/C//T      | synonymous    | 1 | 0 |
| PHB2      | chr12 | 7079764/C//A        | synonymous    | 1 | 0 |
| OVCH1     | chr12 | 29640670/T//A       | nonsynonymous | 1 | 0 |
| KRT74     | chr12 | 52966327/C//T       | nonsynonymous | 1 | 0 |
| RPL10L    | chr14 | 47120750/C//A       | nonsynonymous | 1 | 0 |
| SIX4      | chr14 | 61190487/C//A       | synonymous    | 1 | 0 |
| DYNC1H1   | chr14 | 102500443/C//T      | nonsynonymous | 1 | 0 |
| MYO9A     | chr15 | 72154872/T//C       | nonsynonymous | 1 | 0 |
| IGF1R     | chr15 | 99482454/A//G       | nonsynonymous | 1 | 0 |
|           | chr16 | 30000921/A//T       | synonymous    | 1 | 0 |
| NOD2      | chr16 | 50741792/G//A       | synonymous    | 1 | 0 |
| CHD9      | chr16 | 53191341/G//A       | nonsynonymous | 1 | 0 |
| MYH2      | chr17 | 10438620/G//T       | synonymous    | 1 | 0 |
| TANC2     | chr17 | 61466019/A//G       | synonymous    | 1 | 0 |
| WDR7      | chr18 | 54606595/T//A       | synonymous    | 1 | 0 |

|           |       |                    |               |   |   |
|-----------|-------|--------------------|---------------|---|---|
| POLRMT    | chr19 | 619660/C//T        | nonsynonymous | 1 | 0 |
| ZNF98     | chr19 | 22574507/C//T      | nonsynonymous | 1 | 0 |
| ZNF99     | chr19 | 22940819/C//T      | nonsynonymous | 1 | 0 |
| GEMIN7    | chr19 | 45593803/G//A      | synonymous    | 1 | 0 |
| PCBP3     | chr21 | 47333890/C//T      | nonsynonymous | 1 | 0 |
| CYLC1     | chrX  | 83128482/G//T      | nonsynonymous | 1 | 0 |
| TSPAN6    | chrX  | 99890621/G//A      | synonymous    | 1 | 0 |
| NRK       | chrX  | 105167201/G//A     | nonsynonymous | 1 | 0 |
| COL4A5    | chrX  | 107811865/C//T     | nonsynonymous | 1 | 0 |
| CSMD2     | chr1  | 34164507/G//T      | synonymous    | 1 | 0 |
|           | chr3  | 42947777/T//C      | synonymous    | 1 | 0 |
| FRAS1     | chr4  | 79321907/T//C      | nonsynonymous | 1 | 0 |
| DPCR1     | chr6  | 30919042/T//A      | nonsynonymous | 1 | 0 |
| ZNF680    | chr7  | 63982032/C//T      | nonsynonymous | 1 | 0 |
| HK1       | chr10 | 71136767/T//C      | nonsynonymous | 1 | 0 |
| CEP55     | chr10 | 95262948/A//G      | nonsynonymous | 1 | 0 |
| TPCN2     | chr11 | 68848953/A//G      | nonsynonymous | 1 | 0 |
| AHNAK2    | chr14 | 105411924/T//C     | synonymous    | 1 | 0 |
| AHNAK2    | chr14 | 105411935/A//G     | synonymous    | 1 | 0 |
| MRC2      | chr17 | 60767046/C//T      | synonymous    | 1 | 0 |
| C5AR1     | chr19 | 47823842/C//T      | nonsynonymous | 1 | 0 |
| ZNF628    | chr19 | 55993019/C//T      | synonymous    | 1 | 0 |
| ZNF141    | chr4  | 367169/G//A        | nonsynonymous | 1 | 0 |
| ZNF141    | chr4  | 367201/C//A        | synonymous    | 1 | 0 |
| ZNF141    | chr4  | 367206/C//G        | nonsynonymous | 1 | 0 |
| GAS6      | chr13 | 114529991/G//A     | synonymous    | 1 | 0 |
| KRTAP10-5 | chr21 | 45999964/G//T      | synonymous    | 1 | 0 |
| HRH1      | chr3  | 11301096/C//T      | nonsynonymous | 0 | 1 |
| AGTR1     | chr3  | 148459850/A//T     | nonsynonymous | 0 | 1 |
| AGGF1     | chr5  | 76349784/C//A      | synonymous    | 0 | 1 |
| ZSCAN12   | chr6  | 28366147/G//C      | nonsynonymous | 0 | 1 |
| PILRA     | chr7  | 99971731/C//T      | synonymous    | 0 | 1 |
| DDX10     | chr11 | 108535968/A//T     | nonsynonymous | 0 | 1 |
| SMARCC2   | chr12 | 56558290/T//C      | nonsynonymous | 0 | 1 |
| CREBBP    | chr16 | 3830753/C//A       | synonymous    | 0 | 1 |
| KIR2DS4   | chr19 | 55344151/C//T      | synonymous    | 0 | 1 |
| SLC25A14  | chrX  | 129483282/C//T     | synonymous    | 0 | 1 |
| SLITRK4   | chrX  | 142717857/T//C     | synonymous    | 0 | 1 |
| CROCC     | chr1  | 17280760/A//C      | nonsynonymous | 1 | 0 |
| ARID1A    | chr1  | 27107087/GGGCT//G  | nonsynonymous | 1 | 0 |
| ARID1A    | chr1  | 27107093/CCCGCG//C | nonsynonymous | 1 | 0 |
| SZT2      | chr1  | 43912737/C//G      | nonsynonymous | 1 | 0 |
| UROD      | chr1  | 45480627/G//T      | nonsynonymous | 1 | 0 |
| ZCCHC11   | chr1  | 52924026/AAC//A    | nonsynonymous | 1 | 0 |
| SHC1      | chr1  | 154942572/G//C     | nonsynonymous | 1 | 0 |
| FCRL5     | chr1  | 157488568/G//T     | nonsynonymous | 1 | 0 |
| ATP1A4    | chr1  | 160143513/A//T     | synonymous    | 1 | 0 |
| CACNA1E   | chr1  | 181724510/C//A     | synonymous    | 1 | 0 |
| CACNA1E   | chr1  | 181741358/C//T     | synonymous    | 1 | 0 |
| NAV1      | chr1  | 201751574/G//A     | nonsynonymous | 1 | 0 |
| ANGEL2    | chr1  | 213170538/A//T     | nonsynonymous | 1 | 0 |
| GTF3C2    | chr2  | 27552303/T//G      | nonsynonymous | 1 | 0 |
| EML6      | chr2  | 55184953/C//T      | nonsynonymous | 1 | 0 |
| MRPL19    | chr2  | 75881922/T//C      | nonsynonymous | 1 | 0 |
| GCFC2     | chr2  | 75900599/ATCT//A   | nonsynonymous | 1 | 0 |
| GCFC2     | chr2  | 75900602/T//A      | nonsynonymous | 1 | 0 |
| FABP1     | chr2  | 88422601/A//G      | nonsynonymous | 1 | 0 |
| ZNF804A   | chr2  | 185798333/C//T     | nonsynonymous | 1 | 0 |
| KANSL1L   | chr2  | 210896258/A//C     | nonsynonymous | 1 | 0 |
| SP110     | chr2  | 231042250/A//C     | synonymous    | 1 | 0 |
| NSUN3     | chr3  | 93813134/A//G      | nonsynonymous | 1 | 0 |
| GUCY1A3   | chr4  | 156625091/G//T     | nonsynonymous | 1 | 0 |
| TENM3     | chr4  | 183601037/T//C     | synonymous    | 1 | 0 |
| PCDHA8    | chr5  | 140220990/C//A     | nonsynonymous | 1 | 0 |
| PCDHB7    | chr5  | 140553130/C//T     | synonymous    | 1 | 0 |
| RMND5B    | chr5  | 177571073/C//G     | nonsynonymous | 1 | 0 |
| MICA      | chr6  | 31378326/A//G      | nonsynonymous | 1 | 0 |
| LY6G6F    | chr6  | 31675548/C//T      | synonymous    | 1 | 0 |
| COL21A1   | chr6  | 55925822/C//A      | nonsynonymous | 1 | 0 |
| DST       | chr6  | 56380313/T//C      | nonsynonymous | 1 | 0 |

|              |       |                  |               |   |   |
|--------------|-------|------------------|---------------|---|---|
| AKIRIN2      | chr6  | 88387630/TAG//T  | nonsynonymous | 1 | 0 |
| ASCC3        | chr6  | 100964182/C//A   | nonsynonymous | 1 | 0 |
| DDO          | chr6  | 110714120/C//T   | nonsynonymous | 1 | 0 |
| TUBE1        | chr6  | 112405419/C//T   | synonymous    | 1 | 0 |
| C7orf65      | chr7  | 47698664/T//C    | synonymous    | 1 | 0 |
| ZNF679       | chr7  | 63727002/A//C    | nonsynonymous | 1 | 0 |
| MUC17        | chr7  | 100678029/G//T   | nonsynonymous | 1 | 0 |
| SPIDR        | chr8  | 48196640/G//A    | synonymous    | 1 | 0 |
| ATAD2        | chr8  | 124357307/C//T   | synonymous    | 1 | 0 |
| ODF2         | chr9  | 131256862/A//G   | nonsynonymous | 1 | 0 |
| SMC3         | chr10 | 112362968/G//A   | nonsynonymous | 1 | 0 |
| CYP2E1       | chr10 | 135341064/G//A   | synonymous    | 1 | 0 |
| CNGA4        | chr11 | 6261799/G//A     | nonsynonymous | 1 | 0 |
| CYB5R2       | chr11 | 7690950/T//G     | nonsynonymous | 1 | 0 |
| OR5M8        | chr11 | 56258015/T//C    | nonsynonymous | 1 | 0 |
| OR1S2        | chr11 | 57971539/G//T    | nonsynonymous | 1 | 0 |
| CCDC88B      | chr11 | 64120974/T//C    | synonymous    | 1 | 0 |
| RBM4B        | chr11 | 66436740/C//A    | nonsynonymous | 1 | 0 |
| TECTA        | chr11 | 121036011/G//T   | nonsynonymous | 1 | 0 |
| GALNT8       | chr12 | 4870212/T//C     | nonsynonymous | 1 | 0 |
| DENND5B      | chr12 | 31648795/G//C    | nonsynonymous | 1 | 0 |
| NR4A1        | chr12 | 52448993/C//T    | synonymous    | 1 | 0 |
| ITGB7        | chr12 | 53590529/G//A    | nonsynonymous | 1 | 0 |
| ACSS3        | chr12 | 81647122/G//T    | nonsynonymous | 1 | 0 |
| STAB2        | chr12 | 104149253/C//T   | synonymous    | 1 | 0 |
| HECTD4       | chr12 | 112601067/G//A   | nonsynonymous | 1 | 0 |
| PAN3         | chr13 | 28748505/T//C    | nonsynonymous | 1 | 0 |
| DNAJC3       | chr13 | 96443237/C//T    | nonsynonymous | 1 | 0 |
| CDH24        | chr14 | 23518864/A//G    | synonymous    | 1 | 0 |
| PLEKHG3      | chr14 | 65210089/G//T    | nonsynonymous | 1 | 0 |
| NUDT14       | chr14 | 105643034/G//A   | synonymous    | 1 | 0 |
| CYFIP1       | chr15 | 22947069/A//T    | nonsynonymous | 1 | 0 |
| SLC12A6      | chr15 | 34531307/C//T    | nonsynonymous | 1 | 0 |
| GCNT3        | chr15 | 59911563/G//T    | nonsynonymous | 1 | 0 |
| CILP         | chr15 | 65490909/C//T    | nonsynonymous | 1 | 0 |
| AXIN1        | chr16 | 338238/T//TG     | nonsynonymous | 1 | 0 |
| NOD2         | chr16 | 50746078/G//A    | synonymous    | 1 | 0 |
| HYDIN        | chr16 | 70926329/C//A    | nonsynonymous | 1 | 0 |
| FAM64A       | chr17 | 6348729/TACTG//T | synonymous    | 1 | 0 |
| PIGW         | chr17 | 34894458/T//A    | nonsynonymous | 1 | 0 |
| ZNF709       | chr19 | 12575176/T//C    | synonymous    | 1 | 0 |
| ZNF709       | chr19 | 12575188/G//A    | synonymous    | 1 | 0 |
| ZNF709       | chr19 | 12575197/G//A    | synonymous    | 1 | 0 |
| ZNF709       | chr19 | 12575212/T//C    | synonymous    | 1 | 0 |
| ZNF99        | chr19 | 22952103/C//T    | synonymous    | 1 | 0 |
| RELB         | chr19 | 45532212/G//A    | nonsynonymous | 1 | 0 |
| S100B        | chr21 | 48022200/A//G    | synonymous    | 1 | 0 |
| EFCAB6       | chr22 | 43924715/G//A    | synonymous    | 1 | 0 |
| CERK         | chr22 | 47085968/G//C    | nonsynonymous | 1 | 0 |
| CSF2RA       | chrX  | 1428376/C//A     | synonymous    | 1 | 0 |
| SLC25A6      | chrX  | 1506277/C//T     | nonsynonymous | 1 | 0 |
| MXRA5        | chrX  | 3242042/C//T     | nonsynonymous | 1 | 0 |
| RGN          | chrX  | 46952345/G//A    | synonymous    | 1 | 0 |
| COL4A5       | chrX  | 107867484/G//T   | nonsynonymous | 1 | 0 |
|              | chr1  | 52499523/T//C    | synonymous    | 0 | 1 |
| TCTEX1D1     | chr1  | 67243077/T//C    | synonymous    | 0 | 1 |
| FBN2         | chr5  | 127710398/C//T   | nonsynonymous | 0 | 1 |
| URGCP-MRPS24 | chr7  | 43927020/T//A    | nonsynonymous | 0 | 1 |
| PRLHR        | chr10 | 120353828/G//A   | nonsynonymous | 0 | 1 |
| LTBR         | chr12 | 6494299/G//A     | nonsynonymous | 0 | 1 |
| DNAJC15      | chr13 | 43681416/G//A    | synonymous    | 0 | 1 |
| ZNF681       | chr19 | 23927648/C//A    | nonsynonymous | 0 | 1 |
| LTBP4        | chr19 | 41115429/C//A    | synonymous    | 0 | 1 |
| CHD6         | chr20 | 40049342/T//C    | nonsynonymous | 0 | 1 |
| CDH4         | chr20 | 60419770/C//T    | nonsynonymous | 0 | 1 |
| MEGF6        | chr1  | 3428150/C//T     | nonsynonymous | 0 | 1 |
| TMEM131      | chr2  | 98388801/G//C    | synonymous    | 0 | 1 |
| VWA3B        | chr2  | 98887138/T//TG   | synonymous    | 0 | 1 |
| SAP130       | chr2  | 128757930/G//A   | nonsynonymous | 0 | 1 |
| ZEB2         | chr2  | 145154083/C//T   | nonsynonymous | 0 | 1 |

|          |       |                           |               |   |   |
|----------|-------|---------------------------|---------------|---|---|
| ACADL    | chr2  | 211085530/A//G            | synonymous    | 0 | 1 |
| SLC19A3  | chr2  | 228566973/A//C            | nonsynonymous | 0 | 1 |
| OR6B2    | chr2  | 240968930/C//T            | nonsynonymous | 0 | 1 |
| CLRN1    | chr3  | 150645667/C//G            | synonymous    | 0 | 1 |
| MECOM    | chr3  | 168845744/A//G            | nonsynonymous | 0 | 1 |
| BMP3     | chr4  | 81974645/T//G             | synonymous    | 0 | 1 |
| FGA      | chr4  | 155507878/C//T            | nonsynonymous | 0 | 1 |
| RNF180   | chr5  | 63509426/G//T             | synonymous    | 0 | 1 |
| NR2F1    | chr5  | 92924069/G//A             | nonsynonymous | 0 | 1 |
| PCDHB11  | chr5  | 140581749/G//T            | synonymous    | 0 | 1 |
| MUC22    | chr6  | 30995635/C//T             | synonymous    | 0 | 1 |
| KCNK16   | chr6  | 39285555/G//A             | synonymous    | 0 | 1 |
| CRISP1   | chr6  | 49825093/C//A             | nonsynonymous | 0 | 1 |
| MDN1     | chr6  | 90362784/T//C             | nonsynonymous | 0 | 1 |
| HECW1    | chr7  | 43540360/C//T             | nonsynonymous | 0 | 1 |
| COL1A2   | chr7  | 94027077/A//G             | synonymous    | 0 | 1 |
| FOXP2    | chr7  | 114294066/T//C            | nonsynonymous | 0 | 1 |
| DLC1     | chr8  | 12946153/C//G             | nonsynonymous | 0 | 1 |
| GFRA2    | chr8  | 21608125/C//T             | nonsynonymous | 0 | 1 |
| SCARA5   | chr8  | 27779217/G//A             | nonsynonymous | 0 | 1 |
| BRF2     | chr8  | 37702136/C//T             | nonsynonymous | 0 | 1 |
| PKHD1L1  | chr8  | 110509264/T//G            | nonsynonymous | 0 | 1 |
| CSMD3    | chr8  | 113301594/C//T            | nonsynonymous | 0 | 1 |
| NOL8     | chr9  | 95080971/A//G             | synonymous    | 0 | 1 |
| ZRANB1   | chr10 | 126673556/G//A            | nonsynonymous | 0 | 1 |
| A2M-AS1  | chr12 | 9220458/A//AC             | synonymous    | 0 | 1 |
| ITPR2    | chr12 | 26809309/G//A             | nonsynonymous | 0 | 1 |
| NCKAP1L  | chr12 | 54910704/G//A             | synonymous    | 0 | 1 |
| TPH2     | chr12 | 72338219/C//T             | nonsynonymous | 0 | 1 |
| TCTN2    | chr12 | 124181001/A//G            | nonsynonymous | 0 | 1 |
| TEX26    | chr13 | 31543103/C//T             | nonsynonymous | 0 | 1 |
|          | chr14 | 96998645/T//G             | synonymous    | 0 | 1 |
| GCOM1    | chr15 | 58001163/A//T             | nonsynonymous | 0 | 1 |
| TPSAB1   | chr16 | 1291439/G//A              | nonsynonymous | 0 | 1 |
| ANKRD30B | chr18 | 14763745/C//T             | nonsynonymous | 0 | 1 |
| CAMSAP3  | chr19 | 7675772/C//T              | nonsynonymous | 0 | 1 |
| DOPEY2   | chr21 | 37618898/C//A             | synonymous    | 0 | 1 |
| ZBED4    | chr22 | 50278618/G//A             | synonymous    | 0 | 1 |
| ACTRT2   | chr1  | 2938364/C//T              | synonymous    | 1 | 0 |
| TP73     | chr1  | 3647538/G//A              | nonsynonymous | 1 | 0 |
| SELENON  | chr1  | 26138212/C//T             | nonsynonymous | 1 | 0 |
| SMG5     | chr1  | 156220714/C//T            | nonsynonymous | 1 | 0 |
| PYHIN1   | chr1  | 158908254/A//G            | synonymous    | 1 | 0 |
| NCSTN    | chr1  | 160314587/T//A            | nonsynonymous | 1 | 0 |
| OLFML2B  | chr1  | 161954010/C//T            | nonsynonymous | 1 | 0 |
| REN      | chr1  | 204131165/G//A            | synonymous    | 1 | 0 |
| SPRTN    | chr1  | 231488794/C//T            | nonsynonymous | 1 | 0 |
| SNTG2    | chr2  | 1168851/C//T              | synonymous    | 1 | 0 |
| FEZ2     | chr2  | 36818080/A//G             | nonsynonymous | 1 | 0 |
| LRP1B    | chr2  | 141116494/G//T            | nonsynonymous | 1 | 0 |
| LRP1B    | chr2  | 141299446/C//T            | nonsynonymous | 1 | 0 |
| LRP2     | chr2  | 170101368/G//A            | nonsynonymous | 1 | 0 |
| PLCL1    | chr2  | 198949948/G//A            | synonymous    | 1 | 0 |
| TNS1     | chr2  | 218713295/C//T            | nonsynonymous | 1 | 0 |
| CHL1     | chr3  | 383694/G//A               | nonsynonymous | 1 | 0 |
| RARB     | chr3  | 25502710/G//T             | nonsynonymous | 1 | 0 |
| DNAH12   | chr3  | 57414099/T//A             | nonsynonymous | 1 | 0 |
| ARF4     | chr3  | 57569724/C//T             | synonymous    | 1 | 0 |
| ARHGAP31 | chr3  | 119120876/G//A            | nonsynonymous | 1 | 0 |
| XRN1     | chr3  | 142066080/T//A            | nonsynonymous | 1 | 0 |
|          | chr4  | 6037757/G//A              | synonymous    | 1 | 0 |
| MANBA    | chr4  | 103586012/G//C            | synonymous    | 1 | 0 |
| EGF      | chr4  | 110929386/G//T            | nonsynonymous | 1 | 0 |
| ANK2     | chr4  | 114223940/C//A            | nonsynonymous | 1 | 0 |
| APC      | chr5  | 112175251/GAGCGAAGTTCC//G | nonsynonymous | 1 | 0 |
| CEP120   | chr5  | 122751791/T//C            | synonymous    | 1 | 0 |
| PCDHA3   | chr5  | 140182465/C//T            | synonymous    | 1 | 0 |
| PCDHA3   | chr5  | 140182651/C//T            | synonymous    | 1 | 0 |
| ANKS1A   | chr6  | 34985338/C//T             | synonymous    | 1 | 0 |
| USP45    | chr6  | 99936581/A//T             | synonymous    | 1 | 0 |

|          |       |                            |               |   |   |
|----------|-------|----------------------------|---------------|---|---|
| ARMC2    | chr6  | 109294741/A//G             | synonymous    | 1 | 0 |
| RSPH3    | chr6  | 159421010/C//T             | synonymous    | 1 | 0 |
| PRKAR1B  | chr7  | 635794/G//A                | nonsynonymous | 1 | 0 |
| RADIL    | chr7  | 4855901/A//G               | nonsynonymous | 1 | 0 |
| ZNF138   | chr7  | 64292279/A//G              | nonsynonymous | 1 | 0 |
| STEAP4   | chr7  | 87913400/G//A              | nonsynonymous | 1 | 0 |
| RELN     | chr7  | 103124179/C//T             | nonsynonymous | 1 | 0 |
| GEM      | chr8  | 95272598/C//T              | nonsynonymous | 1 | 0 |
| TRHR     | chr8  | 110100448/A//G             | nonsynonymous | 1 | 0 |
| CCDC180  | chr9  | 100111446/G//A             | nonsynonymous | 1 | 0 |
| RET      | chr10 | 43595916/G//T              | nonsynonymous | 1 | 0 |
| PCDH15   | chr10 | 55849814/G//T              | synonymous    | 1 | 0 |
| PTEN     | chr10 | 89692940/C//T              | nonsynonymous | 1 | 0 |
| ANKRD1   | chr10 | 92672647/C//A              | nonsynonymous | 1 | 0 |
| EBF3     | chr10 | 131666103/G//A             | synonymous    | 1 | 0 |
| MUC2     | chr11 | 1101101/C//A               | nonsynonymous | 1 | 0 |
| OR5L2    | chr11 | 55595115/C//A              | nonsynonymous | 1 | 0 |
| OR5B2    | chr11 | 58190150/C//A              | synonymous    | 1 | 0 |
| CLPB     | chr11 | 72018239/T//C              | synonymous    | 1 | 0 |
| KLRC1    | chr12 | 10603633/C//T              | synonymous    | 1 | 0 |
| TBC1D15  | chr12 | 72291684/A//G              | synonymous    | 1 | 0 |
| FBXW8    | chr12 | 117462049/G//A             | nonsynonymous | 1 | 0 |
| CIT      | chr12 | 120156617/G//T             | nonsynonymous | 1 | 0 |
| DYNC1H1  | chr14 | 102471157/C//T             | nonsynonymous | 1 | 0 |
| DNAH3    | chr16 | 21063049/C//T              | nonsynonymous | 1 | 0 |
| IRX5     | chr16 | 54966694/G//A              | synonymous    | 1 | 0 |
| UTP6     | chr17 | 30202347/G//T              | nonsynonymous | 1 | 0 |
| KRT34    | chr17 | 39538435/C//T              | nonsynonymous | 1 | 0 |
| FSCN2    | chr17 | 79502166/C//A              | nonsynonymous | 1 | 0 |
| CXXC1    | chr18 | 47810129/C//T              | synonymous    | 1 | 0 |
| ZNF91    | chr19 | 23544261/T//G              | nonsynonymous | 1 | 0 |
| TSHZ3    | chr19 | 31770258/G//A              | synonymous    | 1 | 0 |
| CCDC114  | chr19 | 48821986/G//A              | nonsynonymous | 1 | 0 |
| ZNF614   | chr19 | 52519922/C//T              | nonsynonymous | 1 | 0 |
| PEG3     | chr19 | 57328804/C//T              | nonsynonymous | 1 | 0 |
| ZCCHC3   | chr20 | 279539/A//G                | synonymous    | 1 | 0 |
| LZTR1    | chr22 | 21344712/A//G              | nonsynonymous | 1 | 0 |
| MTFP1    | chr22 | 30823324/T//C              | nonsynonymous | 1 | 0 |
| CLCN5    | chrX  | 49853429/A//G              | synonymous    | 1 | 0 |
| GPR173   | chrX  | 53106133/G//A              | synonymous    | 1 | 0 |
| TENM1    | chrX  | 123785896/G//T             | nonsynonymous | 1 | 0 |
| VPS13D   | chr1  | 12326959/C//G              | nonsynonymous | 1 | 0 |
| CD48     | chr1  | 160654968/G//A             | nonsynonymous | 1 | 0 |
| F5       | chr1  | 169528488/G//A             | synonymous    | 1 | 0 |
| PRRC2C   | chr1  | 171514610/T//C             | synonymous    | 1 | 0 |
| KIAA1614 | chr1  | 180897590/T//C             | synonymous    | 1 | 0 |
| ADSS     | chr1  | 244600961/T//C             | synonymous    | 1 | 0 |
| ATP6V1C2 | chr2  | 10924461/C//A              | synonymous    | 1 | 0 |
| NCOA1    | chr2  | 24991317/A//G              | synonymous    | 1 | 0 |
| SULT1C3  | chr2  | 108868909/C//T             | synonymous    | 1 | 0 |
| NEUROD1  | chr2  | 182543123/C//G             | nonsynonymous | 1 | 0 |
| KANSL1L  | chr2  | 210888764/TCTTGA//T        | nonsynonymous | 1 | 0 |
| ADAMTS9  | chr3  | 64601739/T//C              | nonsynonymous | 1 | 0 |
| SLCO2A1  | chr3  | 133698403/G//A             | synonymous    | 1 | 0 |
| SMC4     | chr3  | 160150140/G//A             | nonsynonymous | 1 | 0 |
| CLDN16   | chr3  | 190106143/G//A             | nonsynonymous | 1 | 0 |
| GBA3     | chr4  | 22749310/G//A              | synonymous    | 1 | 0 |
| CCDC149  | chr4  | 24854805/G//C              | synonymous    | 1 | 0 |
| SHISA3   | chr4  | 42403166/C//T              | nonsynonymous | 1 | 0 |
| ATP8A1   | chr4  | 42487542/A//T              | synonymous    | 1 | 0 |
| FAT4     | chr4  | 126389756/T//G             | nonsynonymous | 1 | 0 |
| SLC25A4  | chr4  | 186066034/C//G             | synonymous    | 1 | 0 |
| FAT1     | chr4  | 187539695/G//GA            | nonsynonymous | 1 | 0 |
| RANBP3L  | chr5  | 36257108/G//A              | nonsynonymous | 1 | 0 |
| C5orf42  | chr5  | 37245883/T//C              | nonsynonymous | 1 | 0 |
| DAB2     | chr5  | 39376159/AGATTTGGTAACTGG// | nonsynonymous | 1 | 0 |
| PCDHGB6  | chr5  | 140789798/G//A             | nonsynonymous | 1 | 0 |
| HIST1H3D | chr6  | 26197391/CGCTCTTTCG//C     | nonsynonymous | 1 | 0 |
| HIST1H3D | chr6  | 26197402/GCAGC//G          | nonsynonymous | 1 | 0 |
| MDN1     | chr6  | 90411669/G//A              | nonsynonymous | 1 | 0 |

|              |       |                   |               |   |   |
|--------------|-------|-------------------|---------------|---|---|
| GRIK2        | chr6  | 102266354/T//C    | nonsynonymous | 1 | 0 |
| INTS1        | chr7  | 1516460/C//G      | nonsynonymous | 1 | 0 |
| DNAH11       | chr7  | 21727014/C//T     | synonymous    | 1 | 0 |
| KMT2E        | chr7  | 104747667/G//C    | nonsynonymous | 1 | 0 |
|              | chr7  | 139056169/C//T    | synonymous    | 1 | 0 |
| EFR3A        | chr8  | 133008712/A//G    | nonsynonymous | 1 | 0 |
| ADGRB1       | chr8  | 143545805/C//G    | synonymous    | 1 | 0 |
| PIGO         | chr9  | 35089078/C//G     | synonymous    | 1 | 0 |
| HNRNPF       | chr10 | 43883204/G//T     | synonymous    | 1 | 0 |
| RUFY2        | chr10 | 70136708/C//T     | synonymous    | 1 | 0 |
| USP54        | chr10 | 75296196/C//A     | nonsynonymous | 1 | 0 |
| MUC5B        | chr11 | 1272534/A//C      | synonymous    | 1 | 0 |
| TRIM6-TRIM34 | chr11 | 5618072/G//C      | synonymous    | 1 | 0 |
| DCHS1        | chr11 | 6661461/C//T      | nonsynonymous | 1 | 0 |
| OR5B21       | chr11 | 58274803/G//T     | nonsynonymous | 1 | 0 |
| AHNAK        | chr11 | 62296388/G//A     | nonsynonymous | 1 | 0 |
| FLRT1        | chr11 | 63884881/C//T     | nonsynonymous | 1 | 0 |
| INPPL1       | chr11 | 71948459/A//G     | synonymous    | 1 | 0 |
| EMSY         | chr11 | 76237635/A//G     | nonsynonymous | 1 | 0 |
| CREBZF       | chr11 | 85375309/T//C     | nonsynonymous | 1 | 0 |
| RNF26        | chr11 | 119206355/G//A    | nonsynonymous | 1 | 0 |
| CCT2         | chr12 | 69983422/A//AT    | nonsynonymous | 1 | 0 |
| CCDC60       | chr12 | 119966552/G//A    | nonsynonymous | 1 | 0 |
| EP400        | chr12 | 132535190/T//A    | nonsynonymous | 1 | 0 |
| NAXD         | chr13 | 111274643/A//T    | nonsynonymous | 1 | 0 |
| DTD2         | chr14 | 31917547/G//C     | nonsynonymous | 1 | 0 |
| TXNDC16      | chr14 | 52957632/T//A     | nonsynonymous | 1 | 0 |
| ATP10A       | chr15 | 25963550/C//T     | synonymous    | 1 | 0 |
| HERC2        | chr15 | 28493826/G//C     | nonsynonymous | 1 | 0 |
| DNAJA3       | chr16 | 4492286/A//T      | synonymous    | 1 | 0 |
| NDE1         | chr16 | 15818335/ACT//A   | synonymous    | 1 | 0 |
| C16orf62     | chr16 | 19621637/C//G     | synonymous    | 1 | 0 |
| ITGAX        | chr16 | 31392265/C//T     | synonymous    | 1 | 0 |
| TP53         | chr17 | 7577545/T//C      | nonsynonymous | 1 | 0 |
| ALOXE3       | chr17 | 8014823/C//A      | nonsynonymous | 1 | 0 |
| CASC3        | chr17 | 38324469/C//G     | nonsynonymous | 1 | 0 |
| MED13        | chr17 | 60042423/C//T     | synonymous    | 1 | 0 |
| ZNF417       | chr19 | 58427833/C//A     | synonymous    | 1 | 0 |
| EDEM2        | chr20 | 33711692/C//G     | nonsynonymous | 1 | 0 |
| UBE2L3       | chr22 | 21975877/A//G     | synonymous    | 1 | 0 |
| HCCS         | chrX  | 11136643/A//G     | nonsynonymous | 1 | 0 |
| TOP2A        | chr17 | 38557328/A//AAAAG | nonsynonymous | 1 | 0 |
|              | chr20 | 44444029/G//T     | synonymous    | 1 | 0 |
| DNMT3A       | chr2  | 25505353/G//A     | synonymous    | 0 | 1 |
| MYO15A       | chr17 | 18034656/G//T     | nonsynonymous | 0 | 1 |
|              | chr19 | 51890495/C//T     | synonymous    | 0 | 1 |
| ZNF480       | chr19 | 52825062/T//C     | nonsynonymous | 0 | 1 |
| GLIS1        | chr1  | 54060643/G//A     | synonymous    | 0 | 1 |
| ZNF695       | chr1  | 247171227/G//T    | synonymous    | 0 | 1 |
| HERC5        | chr4  | 89400539/A//G     | nonsynonymous | 0 | 1 |
| SEMA3C       | chr7  | 80387707/C//T     | nonsynonymous | 0 | 1 |
| ADAM18       | chr8  | 39495205/C//T     | synonymous    | 0 | 1 |
| TATDN1       | chr8  | 125516556/T//C    | synonymous    | 0 | 1 |
| DBX1         | chr11 | 20177902/G//T     | nonsynonymous | 0 | 1 |
| FEN1         | chr11 | 61563538/T//C     | synonymous    | 0 | 1 |
| ZNF714       | chr19 | 21300905/T//C     | nonsynonymous | 0 | 1 |
| AP1B1        | chr22 | 29759007/G//C     | synonymous    | 0 | 1 |
| ZCCHC11      | chr1  | 52903933/T//C     | synonymous    | 0 | 1 |
| MFSD14A      | chr1  | 100533730/G//A    | nonsynonymous | 0 | 1 |
| TNR          | chr1  | 175335069/G//A    | synonymous    | 0 | 1 |
| NBAS         | chr2  | 15614187/T//C     | synonymous    | 0 | 1 |
| MGAT4A       | chr2  | 99294830/G//A     | nonsynonymous | 0 | 1 |
| BAZ2B        | chr2  | 160252273/C//T    | synonymous    | 0 | 1 |
| TTN          | chr2  | 179474247/C//A    | nonsynonymous | 0 | 1 |
| KCNH8        | chr3  | 19498240/A//ATC   | synonymous    | 0 | 1 |
| KCNH8        | chr3  | 19498255/T//G     | synonymous    | 0 | 1 |
| EHHADH       | chr3  | 184971805/G//A    | synonymous    | 0 | 1 |
| SFRP2        | chr4  | 154709962/A//G    | nonsynonymous | 0 | 1 |
| MARCH1       | chr4  | 164507068/C//T    | nonsynonymous | 0 | 1 |
| NEIL3        | chr4  | 178274649/C//G    | nonsynonymous | 0 | 1 |

|          |       |                 |               |   |   |
|----------|-------|-----------------|---------------|---|---|
| PCDHA11  | chr5  | 140250917/G//A  | synonymous    | 0 | 1 |
| PCDHB7   | chr5  | 140553939/C//T  | nonsynonymous | 0 | 1 |
| DIAPH1   | chr5  | 140962837/C//T  | nonsynonymous | 0 | 1 |
| FAT2     | chr5  | 150947110/A//C  | synonymous    | 0 | 1 |
| NSD1     | chr5  | 176638793/C//T  | synonymous    | 0 | 1 |
| MAS1L    | chr6  | 29454693/G//A   | synonymous    | 0 | 1 |
| UHRF1BP1 | chr6  | 34759954/A//G   | synonymous    | 0 | 1 |
| ULBP2    | chr6  | 150267513/C//T  | nonsynonymous | 0 | 1 |
| CSMD1    | chr8  | 3047554/C//T    | nonsynonymous | 0 | 1 |
| PLEKHA2  | chr8  | 38809812/C//T   | synonymous    | 0 | 1 |
| RGS22    | chr8  | 101083656/G//C  | nonsynonymous | 0 | 1 |
| TLE1     | chr9  | 84302310/T//C   | nonsynonymous | 0 | 1 |
| KYAT1    | chr9  | 131597829/G//T  | nonsynonymous | 0 | 1 |
| AGPAT2   | chr9  | 139572003/A//C  | nonsynonymous | 0 | 1 |
|          | chr10 | 55566321/T//C   | synonymous    | 0 | 1 |
| MYBPC3   | chr11 | 47364615/G//A   | synonymous    | 0 | 1 |
| FOXR1    | chr11 | 118851387/G//A  | nonsynonymous | 0 | 1 |
| SORL1    | chr11 | 121340819/C//G  | nonsynonymous | 0 | 1 |
| A2ML1    | chr12 | 9016454/T//C    | synonymous    | 0 | 1 |
| DIP2B    | chr12 | 51097946/C//T   | synonymous    | 0 | 1 |
| MBD6     | chr12 | 57920994/C//T   | nonsynonymous | 0 | 1 |
| CLEC14A  | chr14 | 38724907/G//A   | synonymous    | 0 | 1 |
| GEMIN4   | chr17 | 650986/C//T     | synonymous    | 0 | 1 |
| LAMA1    | chr18 | 7042183/C//G    | nonsynonymous | 0 | 1 |
| POTEC    | chr18 | 14542908/C//T   | nonsynonymous | 0 | 1 |
| ZNF823   | chr19 | 11832565/A//T   | nonsynonymous | 0 | 1 |
| PSMC4    | chr19 | 40480666/G//A   | nonsynonymous | 0 | 1 |
| SFI1     | chr22 | 32014387/C//A   | synonymous    | 0 | 1 |
| DFFB     | chr1  | 3800085/G//A    | nonsynonymous | 0 | 1 |
| ALPL     | chr1  | 21904093/C//G   | synonymous    | 0 | 1 |
|          | chr1  | 26872416/C//T   | synonymous    | 0 | 1 |
| ZMYM4    | chr1  | 35864590/A//C   | nonsynonymous | 0 | 1 |
| ST3GAL3  | chr1  | 44202013/C//T   | nonsynonymous | 0 | 1 |
| TNR      | chr1  | 175292483/C//T  | synonymous    | 0 | 1 |
| KIF26B   | chr1  | 245849618/C//T  | synonymous    | 0 | 1 |
| ZNF124   | chr1  | 247320365/A//T  | nonsynonymous | 0 | 1 |
| PLB1     | chr2  | 28718985/G//A   | nonsynonymous | 0 | 1 |
| ANKRD36  | chr2  | 97845505/T//A   | nonsynonymous | 0 | 1 |
| ITGA4    | chr2  | 182360535/G//A  | nonsynonymous | 0 | 1 |
| IGFBP5   | chr2  | 217543680/T//C  | nonsynonymous | 0 | 1 |
| OBSL1    | chr2  | 220422557/C//T  | nonsynonymous | 0 | 1 |
| COL4A3   | chr2  | 228168613/C//T  | nonsynonymous | 0 | 1 |
| LARS2    | chr3  | 45435950/C//T   | nonsynonymous | 0 | 1 |
| USP19    | chr3  | 49151435/C//T   | nonsynonymous | 0 | 1 |
| SFMBT1   | chr3  | 52941684/C//T   | nonsynonymous | 0 | 1 |
| NFKBIZ   | chr3  | 101570923/G//T  | synonymous    | 0 | 1 |
| UGT2B28  | chr4  | 70146795/T//C   | nonsynonymous | 0 | 1 |
| ANXA5    | chr4  | 122604636/AC//A | synonymous    | 0 | 1 |
| FAT4     | chr4  | 126411861/C//T  | synonymous    | 0 | 1 |
| LARP1B   | chr4  | 129127674/A//C  | nonsynonymous | 0 | 1 |
| POU4F2   | chr4  | 147561756/C//T  | synonymous    | 0 | 1 |
| C5orf42  | chr5  | 37142470/A//G   | synonymous    | 0 | 1 |
| IQGAP2   | chr5  | 75936934/T//A   | synonymous    | 0 | 1 |
| FAM114A2 | chr5  | 153407722/G//A  | nonsynonymous | 0 | 1 |
| SLC17A3  | chr6  | 25850350/C//T   | nonsynonymous | 0 | 1 |
| HIST1H1D | chr6  | 26234566/T//C   | nonsynonymous | 0 | 1 |
| NOTCH4   | chr6  | 32170051/G//A   | nonsynonymous | 0 | 1 |
| INTS1    | chr7  | 1529250/G//A    | nonsynonymous | 0 | 1 |
| CADPS2   | chr7  | 122130280/G//C  | nonsynonymous | 0 | 1 |
| RP1      | chr8  | 55539725/G//A   | nonsynonymous | 0 | 1 |
| TRPA1    | chr8  | 72969150/A//T   | nonsynonymous | 0 | 1 |
| FBXO43   | chr8  | 101146202/T//C  | nonsynonymous | 0 | 1 |
| TONSL    | chr8  | 145661594/C//T  | nonsynonymous | 0 | 1 |
| PTPRD    | chr9  | 8636794/C//T    | nonsynonymous | 0 | 1 |
| GABBR2   | chr9  | 101340307/G//A  | synonymous    | 0 | 1 |
| PCBD1    | chr10 | 72643682/A//C   | synonymous    | 0 | 1 |
| OR5B12   | chr11 | 58207494/A//G   | nonsynonymous | 0 | 1 |
| HSPB2    | chr11 | 111783500/G//C  | synonymous    | 0 | 1 |
| OR10G4   | chr11 | 123886380/C//T  | synonymous    | 0 | 1 |
| ADAMTS15 | chr11 | 130343086/C//T  | synonymous    | 0 | 1 |

|           |       |                          |               |   |   |
|-----------|-------|--------------------------|---------------|---|---|
| SLCO1B3   | chr12 | 21011428/G//A            | synonymous    | 0 | 1 |
| ARID2     | chr12 | 46287446/C//A            | synonymous    | 0 | 1 |
| RNFT2     | chr12 | 117178224/C//T           | synonymous    | 0 | 1 |
| OGFOD2    | chr12 | 123461215/G//A           | synonymous    | 0 | 1 |
| KBTBD7    | chr13 | 41767850/C//T            | nonsynonymous | 0 | 1 |
| BCL2L2    | chr14 | 23778144/A//G            | synonymous    | 0 | 1 |
| ATG14     | chr14 | 55878516/C//A            | nonsynonymous | 0 | 1 |
| SECISBP2L | chr15 | 49319555/G//T            | synonymous    | 0 | 1 |
| USP8      | chr15 | 50773694/A//T            | nonsynonymous | 0 | 1 |
| TTC23     | chr15 | 99762036/C//T            | nonsynonymous | 0 | 1 |
| C16orf59  | chr16 | 2510948/T//C             | nonsynonymous | 0 | 1 |
| MMP15     | chr16 | 58077135/G//A            | nonsynonymous | 0 | 1 |
|           | chr17 | 8110694/A//G             | synonymous    | 0 | 1 |
| COX10     | chr17 | 14095332/CTTG//C         | nonsynonymous | 0 | 1 |
| FLII      | chr17 | 18157911/G//C            | nonsynonymous | 0 | 1 |
| SARM1     | chr17 | 26715534/T//C            | synonymous    | 0 | 1 |
| SYT4      | chr18 | 40850419/C//T            | nonsynonymous | 0 | 1 |
| DOCK6     | chr19 | 11348720/C//T            | nonsynonymous | 0 | 1 |
| ZNF99     | chr19 | 22941969/T//C            | nonsynonymous | 0 | 1 |
| GRIK5     | chr19 | 42526118/C//T            | nonsynonymous | 0 | 1 |
| PLEKHA4   | chr19 | 49357492/G//A            | synonymous    | 0 | 1 |
| ZNF417    | chr19 | 58420699/C//A            | nonsynonymous | 0 | 1 |
| DSCAM     | chr21 | 42080552/G//A            | synonymous    | 0 | 1 |
| RNF215    | chr22 | 30780470/G//T            | nonsynonymous | 0 | 1 |
| KIAA2022  | chrX  | 73960381/G//T            | synonymous    | 0 | 1 |
| DHRS3     | chr1  | 12638881/T//C            | nonsynonymous | 1 | 0 |
| KAZN      | chr1  | 15382629/C//A            | synonymous    | 1 | 0 |
| INPP5B    | chr1  | 38338649/T//C            | nonsynonymous | 1 | 0 |
| SZT2      | chr1  | 43891246/G//C            | nonsynonymous | 1 | 0 |
| RAD54L    | chr1  | 46726931/A//G            | nonsynonymous | 1 | 0 |
| ORC1      | chr1  | 52851616/C//T            | synonymous    | 1 | 0 |
| JUN       | chr1  | 59247792/G//A            | synonymous    | 1 | 0 |
|           | chr1  | 144931697/A//G           | synonymous    | 1 | 0 |
| FLG       | chr1  | 152283628/T//G           | nonsynonymous | 1 | 0 |
| PMVK      | chr1  | 154909061/G//C           | synonymous    | 1 | 0 |
| ADAM15    | chr1  | 155026945/CACCAGAGCACCCC | nonsynonymous | 1 | 0 |
| FCRL5     | chr1  | 157504555/C//A           | nonsynonymous | 1 | 0 |
| SLC9C2    | chr1  | 173517622/A//G           | nonsynonymous | 1 | 0 |
| PROX1     | chr1  | 214170702/C//T           | nonsynonymous | 1 | 0 |
| USH2A     | chr1  | 216371894/T//C           | nonsynonymous | 1 | 0 |
| OBSCN     | chr1  | 228466868/C//T           | synonymous    | 1 | 0 |
| ID2       | chr2  | 8822540/A//G             | nonsynonymous | 1 | 0 |
| SF3B6     | chr2  | 24290573/A//G            | synonymous    | 1 | 0 |
| ARHGAP25  | chr2  | 69053179/G//T            | nonsynonymous | 1 | 0 |
| TMEM182   | chr2  | 103431399/T//C           | nonsynonymous | 1 | 0 |
| NPHP1     | chr2  | 110905561/T//C           | nonsynonymous | 1 | 0 |
| GLI2      | chr2  | 121729597/G//T           | nonsynonymous | 1 | 0 |
| ZRANB3    | chr2  | 135975169/T//C           | synonymous    | 1 | 0 |
| RIF1      | chr2  | 152273140/C//T           | nonsynonymous | 1 | 0 |
| FAP       | chr2  | 163045647/C//G           | nonsynonymous | 1 | 0 |
| DNAH7     | chr2  | 196671513/G//A           | nonsynonymous | 1 | 0 |
| CTNNB1    | chr3  | 41266124/A//G            | nonsynonymous | 1 | 0 |
| IQCF5     | chr3  | 51909587/C//T            | synonymous    | 1 | 0 |
| DNAH12    | chr3  | 57386152/T//C            | nonsynonymous | 1 | 0 |
| DNAH12    | chr3  | 57394246/T//A            | nonsynonymous | 1 | 0 |
| PRICKLE2  | chr3  | 64085564/G//A            | synonymous    | 1 | 0 |
| MYH15     | chr3  | 108100292/A//G           | synonymous    | 1 | 0 |
| CCDC80    | chr3  | 112324595/T//G           | nonsynonymous | 1 | 0 |
| NNT       | chr5  | 43644783/A//G            | nonsynonymous | 1 | 0 |
| WDR41     | chr5  | 76732220/C//T            | nonsynonymous | 1 | 0 |
| PCDHB8    | chr5  | 140558930/A//C           | nonsynonymous | 1 | 0 |
| KIF4B     | chr5  | 154395644/G//A           | nonsynonymous | 1 | 0 |
| LYRM4     | chr6  | 5109731/G//C             | synonymous    | 1 | 0 |
| MRPS18A   | chr6  | 43648826/T//G            | synonymous    | 1 | 0 |
| TCTE1     | chr6  | 44253968/G//C            | synonymous    | 1 | 0 |
| KHDRBS2   | chr6  | 62604653/G//A            | nonsynonymous | 1 | 0 |
| PHF3      | chr6  | 64422653/A//T            | synonymous    | 1 | 0 |
| EPHA7     | chr6  | 93964405/G//T            | nonsynonymous | 1 | 0 |
| EPHA7     | chr6  | 93969203/A//G            | synonymous    | 1 | 0 |
| MMS22L    | chr6  | 97634380/T//C            | synonymous    | 1 | 0 |



|                |       |                    |               |   |   |
|----------------|-------|--------------------|---------------|---|---|
| MMS22L         | chr6  | 97679308/T//C      | nonsynonymous | 1 | 0 |
| STK31          | chr7  | 23872011/T//C      | synonymous    | 1 | 0 |
| GLI3           | chr7  | 42007345/G//T      | synonymous    | 1 | 0 |
| ZNF679         | chr7  | 63727016/C//G      | nonsynonymous | 1 | 0 |
| SAMD9L         | chr7  | 92761755/G//A      | nonsynonymous | 1 | 0 |
| SAMD9L         | chr7  | 92764961/T//C      | synonymous    | 1 | 0 |
| RELN           | chr7  | 103137060/C//T     | nonsynonymous | 1 | 0 |
| PRAG1          | chr8  | 8235458/C//T       | nonsynonymous | 1 | 0 |
| NEIL2          | chr8  | 11643766/A//G      | nonsynonymous | 1 | 0 |
| NEFL           | chr8  | 24813924/C//A      | nonsynonymous | 1 | 0 |
| MCM4           | chr8  | 48883893/T//G      | synonymous    | 1 | 0 |
| PXDNL          | chr8  | 52387558/G//A      | nonsynonymous | 1 | 0 |
| RP1            | chr8  | 55541955/G//T      | nonsynonymous | 1 | 0 |
| PKHD1L1        | chr8  | 110477038/A//T     | synonymous    | 1 | 0 |
| CSMD3          | chr8  | 113301671/T//C     | nonsynonymous | 1 | 0 |
| RANBP6         | chr9  | 6012568/T//C       | nonsynonymous | 1 | 0 |
| MPDZ           | chr9  | 13217183/T//A      | nonsynonymous | 1 | 0 |
| TLE1           | chr9  | 84205888/A//T      | nonsynonymous | 1 | 0 |
| C9orf84        | chr9  | 114464392/T//G     | nonsynonymous | 1 | 0 |
| FBXW5          | chr9  | 139836814/G//A     | synonymous    | 1 | 0 |
| MEIG1          | chr10 | 15014678/G//A      | synonymous    | 1 | 0 |
| YME1L1         | chr10 | 27437850/C//G      | nonsynonymous | 1 | 0 |
| ARMC4          | chr10 | 28229517/C//T      | nonsynonymous | 1 | 0 |
| MPP7           | chr10 | 28408599/T//C      | synonymous    | 1 | 0 |
| NODAL          | chr10 | 72195393/G//A      | synonymous    | 1 | 0 |
| IDE            | chr10 | 94214155/G//A      | synonymous    | 1 | 0 |
| BAG3           | chr10 | 121436267/G//A     | nonsynonymous | 1 | 0 |
| SEC23IP        | chr10 | 121658348/G//T     | nonsynonymous | 1 | 0 |
| HPX            | chr11 | 6462189/G//C       | nonsynonymous | 1 | 0 |
| OR5M1          | chr11 | 56380091/A//T      | nonsynonymous | 1 | 0 |
| PATL1          | chr11 | 59410402/G//C      | nonsynonymous | 1 | 0 |
| AHNAK          | chr11 | 62293365/G//T      | nonsynonymous | 1 | 0 |
| ATL3           | chr11 | 63419981/T//C      | nonsynonymous | 1 | 0 |
| MIR6751        | chr11 | 64897449/G//T      | synonymous    | 1 | 0 |
| GAL3ST3        | chr11 | 65811050/G//A      | nonsynonymous | 1 | 0 |
| KMT5B          | chr11 | 67925191/C//G      | nonsynonymous | 1 | 0 |
| PPFIA2         | chr12 | 81734880/A//G      | synonymous    | 1 | 0 |
| ZNF664-FAM101A | chr12 | 124799047/C//T     | synonymous    | 1 | 0 |
| FLT1           | chr13 | 28880896/T//C      | nonsynonymous | 1 | 0 |
| ALOX5AP        | chr13 | 31338161/T//C      | nonsynonymous | 1 | 0 |
| NBEA           | chr13 | 36229790/G//T      | nonsynonymous | 1 | 0 |
| NBEA           | chr13 | 36245141/A//T      | synonymous    | 1 | 0 |
| POSTN          | chr13 | 38151891/A//G      | synonymous    | 1 | 0 |
| CLDN10         | chr13 | 96205110/A//G      | nonsynonymous | 1 | 0 |
| ADCY4          | chr14 | 24802150/C//A      | synonymous    | 1 | 0 |
| MAGEL2         | chr15 | 23891051/C//T      | synonymous    | 1 | 0 |
| C16orf96       | chr16 | 4626149/T//G       | synonymous    | 1 | 0 |
| RABEP2         | chr16 | 28935775/C//A      | nonsynonymous | 1 | 0 |
| NLRC5          | chr16 | 57093425/C//G      | nonsynonymous | 1 | 0 |
| TMED6          | chr16 | 69383498/G//C      | nonsynonymous | 1 | 0 |
| HP             | chr16 | 72088516/C//T      | synonymous    | 1 | 0 |
| CLUH           | chr17 | 2605359/G//A       | synonymous    | 1 | 0 |
| MYH13          | chr17 | 10222301/G//T      | nonsynonymous | 1 | 0 |
| RARA           | chr17 | 38508733/C//T      | nonsynonymous | 1 | 0 |
| EFTUD2         | chr17 | 42927668/C//T      | synonymous    | 1 | 0 |
| MYOM1          | chr18 | 3188938/A//G       | synonymous    | 1 | 0 |
| LAMA1          | chr18 | 6999991/C//A       | nonsynonymous | 1 | 0 |
| LAMA1          | chr18 | 7050897/A//T       | nonsynonymous | 1 | 0 |
| MIER2          | chr19 | 306679/G//A        | synonymous    | 1 | 0 |
| CFD            | chr19 | 863245/G//A        | synonymous    | 1 | 0 |
| MUC16          | chr19 | 9046344/G//T       | nonsynonymous | 1 | 0 |
| MUC16          | chr19 | 9070992/A//C       | nonsynonymous | 1 | 0 |
| ZNF493         | chr19 | 21607315/A//G      | nonsynonymous | 1 | 0 |
| ACTN4          | chr19 | 39195593/AAAGAT//A | nonsynonymous | 1 | 0 |
| LILRA4         | chr19 | 54845018/T//G      | nonsynonymous | 1 | 0 |
| SIRPD          | chr20 | 1532397/T//C       | nonsynonymous | 1 | 0 |
| PAX1           | chr20 | 21695172/G//T      | nonsynonymous | 1 | 0 |
| KIAA1755       | chr20 | 36870146/G//A      | synonymous    | 1 | 0 |
| GRIK1          | chr21 | 31027151/A//G      | synonymous    | 1 | 0 |
| MAPK1          | chr22 | 22160240/A//T      | nonsynonymous | 1 | 0 |

|           |       |                |               |   |   |
|-----------|-------|----------------|---------------|---|---|
| MORC2     | chr22 | 31330841/C//T  | nonsynonymous | 1 | 0 |
| MEI1      | chr22 | 42159235/G//A  | synonymous    | 1 | 0 |
| CITED1    | chrX  | 71521697/A//G  | nonsynonymous | 1 | 0 |
| CSTF2     | chrX  | 100081706/T//A | synonymous    | 1 | 0 |
| FMR1      | chrX  | 147024813/G//A | nonsynonymous | 1 | 0 |
| OPN1LW    | chrX  | 153421881/T//C | nonsynonymous | 1 | 0 |
| TAZ       | chrX  | 153648414/C//G | nonsynonymous | 1 | 0 |
| SH3BP4    | chr2  | 235951172/T//G | nonsynonymous | 1 | 0 |
| ZNF621    | chr3  | 40574185/G//T  | nonsynonymous | 1 | 0 |
| CADPS     | chr3  | 62556616/A//C  | synonymous    | 1 | 0 |
| ZNF717    | chr3  | 75786256/T//A  | nonsynonymous | 1 | 0 |
| ZNF717    | chr3  | 75786302/G//A  | synonymous    | 1 | 0 |
| ABI3BP    | chr3  | 100583677/C//G | nonsynonymous | 1 | 0 |
| ABCC5     | chr3  | 183670989/T//C | nonsynonymous | 1 | 0 |
| MMRN1     | chr4  | 90856925/A//G  | synonymous    | 1 | 0 |
| EXOSC9    | chr4  | 122724131/T//C | nonsynonymous | 1 | 0 |
| NPY5R     | chr4  | 164272750/G//C | nonsynonymous | 1 | 0 |
| ADGRV1    | chr5  | 90098646/C//T  | nonsynonymous | 1 | 0 |
| LIX1      | chr5  | 96443110/T//C  | nonsynonymous | 1 | 0 |
| TEX43     | chr5  | 125967482/C//T | nonsynonymous | 1 | 0 |
| FBN2      | chr5  | 127697411/C//G | synonymous    | 1 | 0 |
| ARAP3     | chr5  | 141035825/C//G | nonsynonymous | 1 | 0 |
| ZBTB22    | chr6  | 33283741/T//C  | nonsynonymous | 1 | 0 |
| TBC1D22B  | chr6  | 37259052/C//T  | nonsynonymous | 1 | 0 |
| HNRNPA2B1 | chr7  | 26240275/G//C  | synonymous    | 1 | 0 |
| ANLN      | chr7  | 36483401/A//G  | nonsynonymous | 1 | 0 |
| GLI3      | chr7  | 42011928/T//C  | synonymous    | 1 | 0 |
| SRRT      | chr7  | 100482572/G//A | nonsynonymous | 1 | 0 |
| GPR22     | chr7  | 107115542/T//A | nonsynonymous | 1 | 0 |
| IFNK      | chr9  | 27524701/G//C  | nonsynonymous | 1 | 0 |
| EPB41L4B  | chr9  | 111965968/A//G | nonsynonymous | 1 | 0 |
| CNTRL     | chr9  | 123907515/T//A | synonymous    | 1 | 0 |
| GPR158    | chr10 | 25465104/G//T  | nonsynonymous | 1 | 0 |
| UNC5B     | chr10 | 73053609/C//A  | synonymous    | 1 | 0 |
| PHRF1     | chr11 | 608430/C//T    | nonsynonymous | 1 | 0 |
| DNHD1     | chr11 | 6567241/T//C   | nonsynonymous | 1 | 0 |
| RPS6KA4   | chr11 | 64132915/C//T  | nonsynonymous | 1 | 0 |
| GRM5      | chr11 | 88337985/A//G  | nonsynonymous | 1 | 0 |
| FRY       | chr13 | 32676093/T//G  | synonymous    | 1 | 0 |
| FANCM     | chr14 | 45624579/A//G  | nonsynonymous | 1 | 0 |
| TDRD9     | chr14 | 104473035/C//T | synonymous    | 1 | 0 |
| PLA2G4E   | chr15 | 42276652/G//T  | synonymous    | 1 | 0 |
| XYLT1     | chr16 | 17235232/A//G  | synonymous    | 1 | 0 |
| MAP2K3    | chr17 | 21202188/A//G  | nonsynonymous | 1 | 0 |
| MRPL58    | chr17 | 73008929/C//A  | nonsynonymous | 1 | 0 |
| ZNF791    | chr19 | 12739060/T//A  | synonymous    | 1 | 0 |
| TM6SF2    | chr19 | 19381926/C//T  | nonsynonymous | 1 | 0 |
| RYR1      | chr19 | 38956963/C//A  | synonymous    | 1 | 0 |
| LTBP4     | chr19 | 41133668/C//G  | synonymous    | 1 | 0 |
| OPA3      | chr19 | 46056900/C//T  | nonsynonymous | 1 | 0 |
| TULP2     | chr19 | 49398635/G//A  | nonsynonymous | 1 | 0 |
| PJA1      | chrX  | 68382310/G//A  | nonsynonymous | 1 | 0 |
| MED12     | chrX  | 70349672/T//C  | synonymous    | 1 | 0 |
| DIAPH2    | chrX  | 96167520/T//C  | nonsynonymous | 1 | 0 |
| CSDE1     | chr1  | 115272942/C//A | synonymous    | 0 | 1 |
| OR2T5     | chr1  | 248652011/A//T | nonsynonymous | 0 | 1 |
| OR2T5     | chr1  | 248652023/G//A | nonsynonymous | 0 | 1 |
| HOXD1     | chr2  | 177053948/T//A | nonsynonymous | 0 | 1 |
| OSGEPL1   | chr2  | 190626202/A//G | synonymous    | 0 | 1 |
| CEP63     | chr3  | 134226050/T//G | nonsynonymous | 0 | 1 |
| CYTL1     | chr4  | 5018892/T//C   | synonymous    | 0 | 1 |
| KDM1B     | chr6  | 18197348/C//T  | nonsynonymous | 0 | 1 |
| MUC22     | chr6  | 30997806/C//G  | nonsynonymous | 0 | 1 |
| MED23     | chr6  | 131910626/A//G | synonymous    | 0 | 1 |
| DYNC1H1   | chr14 | 102452454/A//G | nonsynonymous | 0 | 1 |
| GRIN2A    | chr16 | 9857813/C//A   | nonsynonymous | 0 | 1 |
| NIPSNAP1  | chr22 | 29954906/T//C  | nonsynonymous | 0 | 1 |
| PER3      | chr1  | 7887336/G//C   | nonsynonymous | 0 | 1 |
| CX3CR1    | chr3  | 39307718/T//C  | nonsynonymous | 0 | 1 |
| OR5M1     | chr11 | 56380203/T//C  | nonsynonymous | 0 | 1 |

|           |       |                |               |   |   |
|-----------|-------|----------------|---------------|---|---|
| CCNB1IP1  | chr14 | 20779740/G//A  | nonsynonymous | 0 | 1 |
| ZNF568    | chr19 | 37441333/C//A  | synonymous    | 0 | 1 |
| TLL10     | chr1  | 1115467/C//T   | nonsynonymous | 1 | 0 |
| ZBTB48    | chr1  | 6647264/G//C   | nonsynonymous | 1 | 0 |
| PADI2     | chr1  | 17395715/C//A  | nonsynonymous | 1 | 0 |
| UBR4      | chr1  | 19489045/C//T  | nonsynonymous | 1 | 0 |
| ADGRB2    | chr1  | 32209913/A//G  | nonsynonymous | 1 | 0 |
| CYP4A11   | chr1  | 47403750/G//A  | synonymous    | 1 | 0 |
| ACOT11    | chr1  | 55050405/C//A  | nonsynonymous | 1 | 0 |
| ODF2L     | chr1  | 86820526/T//C  | nonsynonymous | 1 | 0 |
| HS2ST1    | chr1  | 87570357/A//G  | nonsynonymous | 1 | 0 |
| AMPD1     | chr1  | 115238129/G//A | synonymous    | 1 | 0 |
| PYGO2     | chr1  | 154932153/C//T | nonsynonymous | 1 | 0 |
| NTRK1     | chr1  | 156843452/C//T | nonsynonymous | 1 | 0 |
| DUSP27    | chr1  | 167095682/C//T | synonymous    | 1 | 0 |
| AVPR1B    | chr1  | 206231124/T//C | synonymous    | 1 | 0 |
| GREM2     | chr1  | 240656784/C//T | synonymous    | 1 | 0 |
| OR2G2     | chr1  | 247752431/C//T | nonsynonymous | 1 | 0 |
| OR2G2     | chr1  | 247752496/C//G | nonsynonymous | 1 | 0 |
| SNTG2     | chr2  | 1079328/A//G   | nonsynonymous | 1 | 0 |
| TPO       | chr2  | 1520732/A//C   | nonsynonymous | 1 | 0 |
| ADAM17    | chr2  | 9637285/A//C   | nonsynonymous | 1 | 0 |
| EFR3B     | chr2  | 25351187/A//G  | synonymous    | 1 | 0 |
| CTNNA2    | chr2  | 80136803/C//T  | synonymous    | 1 | 0 |
| SNRNP200  | chr2  | 96957579/G//T  | nonsynonymous | 1 | 0 |
| EPB41L5   | chr2  | 120776787/A//G | nonsynonymous | 1 | 0 |
| THSD7B    | chr2  | 138425360/T//C | synonymous    | 1 | 0 |
| LRP1B     | chr2  | 141533724/G//A | nonsynonymous | 1 | 0 |
| CCDC148   | chr2  | 159201796/T//G | nonsynonymous | 1 | 0 |
| PLA2R1    | chr2  | 160807955/T//C | nonsynonymous | 1 | 0 |
| RAPGEF4   | chr2  | 173853468/A//G | synonymous    | 1 | 0 |
| TTN       | chr2  | 179414470/C//T | nonsynonymous | 1 | 0 |
| DNAH7     | chr2  | 196753625/G//A | synonymous    | 1 | 0 |
| MAP2      | chr2  | 210561660/A//G | synonymous    | 1 | 0 |
|           | chr2  | 210569332/A//T | synonymous    | 1 | 0 |
| AAMP      | chr2  | 219134229/C//T | synonymous    | 1 | 0 |
| COL4A4    | chr2  | 227872117/G//A | nonsynonymous | 1 | 0 |
| HDLBP     | chr2  | 242194476/T//A | nonsynonymous | 1 | 0 |
| NBEAL2    | chr3  | 47049106/A//G  | nonsynonymous | 1 | 0 |
| SETD2     | chr3  | 47163990/T//C  | synonymous    | 1 | 0 |
| AMT       | chr3  | 49457659/A//G  | synonymous    | 1 | 0 |
| PARP3     | chr3  | 51978812/A//C  | synonymous    | 1 | 0 |
| FAM208A   | chr3  | 56707752/T//C  | synonymous    | 1 | 0 |
| OR5AC2    | chr3  | 97806645/T//C  | nonsynonymous | 1 | 0 |
| CMSS1     | chr3  | 99879320/C//A  | nonsynonymous | 1 | 0 |
| ABI3BP    | chr3  | 100513829/C//A | nonsynonymous | 1 | 0 |
| PIK3CB    | chr3  | 138431047/T//C | synonymous    | 1 | 0 |
| XRN1      | chr3  | 142133009/C//T | nonsynonymous | 1 | 0 |
| U2SURP    | chr3  | 142740327/A//G | nonsynonymous | 1 | 0 |
| CCNL1     | chr3  | 156878012/C//T | synonymous    | 1 | 0 |
| PCGF3     | chr4  | 755200/A//C    | nonsynonymous | 1 | 0 |
| BOD1L1    | chr4  | 13589328/T//G  | nonsynonymous | 1 | 0 |
| BOD1L1    | chr4  | 13589346/T//G  | nonsynonymous | 1 | 0 |
| LGI2      | chr4  | 25005179/C//T  | nonsynonymous | 1 | 0 |
| PCDH7     | chr4  | 30725353/A//G  | nonsynonymous | 1 | 0 |
| ATP8A1    | chr4  | 42629055/T//A  | nonsynonymous | 1 | 0 |
| GABRA2    | chr4  | 46334668/G//A  | synonymous    | 1 | 0 |
| ATP10D    | chr4  | 47574206/G//C  | nonsynonymous | 1 | 0 |
| LRRC66    | chr4  | 52860714/T//C  | nonsynonymous | 1 | 0 |
| TMPRSS11D | chr4  | 68688041/A//T  | synonymous    | 1 | 0 |
| AMTN      | chr4  | 71390682/A//G  | synonymous    | 1 | 0 |
| PLA2G12A  | chr4  | 110639914/T//C | synonymous    | 1 | 0 |
|           | chr4  | 168041020/T//C | synonymous    | 1 | 0 |
| CCDC110   | chr4  | 186379510/A//G | nonsynonymous | 1 | 0 |
| CDH9      | chr5  | 26902727/T//C  | nonsynonymous | 1 | 0 |
| BDP1      | chr5  | 70754572/C//T  | nonsynonymous | 1 | 0 |
| VCAN      | chr5  | 82817834/G//A  | nonsynonymous | 1 | 0 |
| ARSK      | chr5  | 94901828/G//T  | nonsynonymous | 1 | 0 |
| LNPEP     | chr5  | 96320863/A//T  | nonsynonymous | 1 | 0 |
| PAM       | chr5  | 102345459/G//T | nonsynonymous | 1 | 0 |

|          |       |                          |               |   |   |
|----------|-------|--------------------------|---------------|---|---|
| PRR16    | chr5  | 120022017/C//T           | synonymous    | 1 | 0 |
| MEGF10   | chr5  | 126781158/T//C           | nonsynonymous | 1 | 0 |
| SOWAHA   | chr5  | 132150612/G//A           | synonymous    | 1 | 0 |
| HSPA9    | chr5  | 137891798/T//C           | synonymous    | 1 | 0 |
| PSD2     | chr5  | 139189332/G//A           | nonsynonymous | 1 | 0 |
| PCDHB1   | chr5  | 140431977/G//A           | nonsynonymous | 1 | 0 |
| PCDHB5   | chr5  | 140515332/T//G           | nonsynonymous | 1 | 0 |
| PCDHB12  | chr5  | 140588654/C//A           | nonsynonymous | 1 | 0 |
| C1QTNF2  | chr5  | 159781938/G//A           | synonymous    | 1 | 0 |
| DOCK2    | chr5  | 169468131/C//A           | synonymous    | 1 | 0 |
| LCP2     | chr5  | 169679462/T//A           | nonsynonymous | 1 | 0 |
| HIVEP1   | chr6  | 12123066/A//G            | nonsynonymous | 1 | 0 |
| HCG4     | chr6  | 29760311/C//A            | synonymous    | 1 | 0 |
| HCG4     | chr6  | 29760518/C//A            | synonymous    | 1 | 0 |
| COL11A2  | chr6  | 33145242/C//A            | nonsynonymous | 1 | 0 |
| CPNE5    | chr6  | 36712824/C//A            | nonsynonymous | 1 | 0 |
| OPN5     | chr6  | 47779418/C//A            | nonsynonymous | 1 | 0 |
| MTFR2    | chr6  | 136554516/T//C           | nonsynonymous | 1 | 0 |
| SYNJ2    | chr6  | 158507940/C//T           | nonsynonymous | 1 | 0 |
| AGR2     | chr7  | 16841013/A//T            | synonymous    | 1 | 0 |
| PCLO     | chr7  | 82582241/C//A            | nonsynonymous | 1 | 0 |
| SEMA3E   | chr7  | 83119476/A//T            | nonsynonymous | 1 | 0 |
| ADAM22   | chr7  | 87792341/A//G            | nonsynonymous | 1 | 0 |
| SAMD9L   | chr7  | 92760874/G//C            | nonsynonymous | 1 | 0 |
| SAMD9L   | chr7  | 92765159/T//C            | synonymous    | 1 | 0 |
| ZAN      | chr7  | 100395027/C//CTAG        | nonsynonymous | 1 | 0 |
| MUC12    | chr7  | 100648786/A//G           | nonsynonymous | 1 | 0 |
| SRPK2    | chr7  | 104782822/A//G           | synonymous    | 1 | 0 |
| GPR85    | chr7  | 112724266/G//T           | nonsynonymous | 1 | 0 |
| MGAM     | chr7  | 141796157/A//G           | nonsynonymous | 1 | 0 |
| ZNF467   | chr7  | 149466217/C//A           | nonsynonymous | 1 | 0 |
| CSMD1    | chr8  | 3047554/C//A             | nonsynonymous | 1 | 0 |
| CSMD1    | chr8  | 3047593/G//C             | nonsynonymous | 1 | 0 |
| MTUS1    | chr8  | 17510934/C//T            | synonymous    | 1 | 0 |
| MOS      | chr8  | 57025616/G//T            | nonsynonymous | 1 | 0 |
| PRDM14   | chr8  | 70978732/T//C            | synonymous    | 1 | 0 |
| RMDN1    | chr8  | 87492552/C//T            | nonsynonymous | 1 | 0 |
| RIMS2    | chr8  | 104930668/G//A           | nonsynonymous | 1 | 0 |
| MED30    | chr8  | 118540915/C//A           | nonsynonymous | 1 | 0 |
| EFR3A    | chr8  | 132991138/A//G           | synonymous    | 1 | 0 |
| WISP1    | chr8  | 134237712/C//T           | synonymous    | 1 | 0 |
| COL22A1  | chr8  | 139610990/G//A           | nonsynonymous | 1 | 0 |
| GPT      | chr8  | 145729750/G//A           | synonymous    | 1 | 0 |
| SMARCA2  | chr9  | 2029006/A//G             | synonymous    | 1 | 0 |
| JAK2     | chr9  | 5054865/G//A             | nonsynonymous | 1 | 0 |
| ADAMTSL1 | chr9  | 18776928/G//T            | nonsynonymous | 1 | 0 |
| TRPM6    | chr9  | 77359055/G//A            | nonsynonymous | 1 | 0 |
| TRPM6    | chr9  | 77411773/T//G            | nonsynonymous | 1 | 0 |
| VPS13A   | chr9  | 79792630/G//T            | nonsynonymous | 1 | 0 |
| ZNF510   | chr9  | 99522421/T//A            | nonsynonymous | 1 | 0 |
| LCN10    | chr9  | 139633999/C//T           | nonsynonymous | 1 | 0 |
| FAM208B  | chr10 | 5790906/C//T             | nonsynonymous | 1 | 0 |
| PRPF18   | chr10 | 13658445/C//G            | synonymous    | 1 | 0 |
| NEBL     | chr10 | 21185962/T//C            | synonymous    | 1 | 0 |
| PARD3    | chr10 | 34625126/C//A            | nonsynonymous | 1 | 0 |
| WDFY4    | chr10 | 49933991/G//A            | synonymous    | 1 | 0 |
| STOX1    | chr10 | 70646129/C//G            | nonsynonymous | 1 | 0 |
| HTR7     | chr10 | 92509161/T//C            | nonsynonymous | 1 | 0 |
| HTR7     | chr10 | 92617103/A//T            | nonsynonymous | 1 | 0 |
| SLK      | chr10 | 105763010/A//G           | nonsynonymous | 1 | 0 |
| MUC6     | chr11 | 1017691/C//G             | nonsynonymous | 1 | 0 |
| HPX      | chr11 | 6462177/C//G             | nonsynonymous | 1 | 0 |
| OR2AG2   | chr11 | 6790155/A//T             | nonsynonymous | 1 | 0 |
| PPFIBP2  | chr11 | 7674305/C//T             | synonymous    | 1 | 0 |
| OR511    | chr11 | 55703386/A//T            | nonsynonymous | 1 | 0 |
| OR4D9    | chr11 | 59283296/G//A            | nonsynonymous | 1 | 0 |
| MS4A14   | chr11 | 60184320/G//A            | nonsynonymous | 1 | 0 |
| UBXN1    | chr11 | 62444314/G//T            | nonsynonymous | 1 | 0 |
| PAAF1    | chr11 | 73620561/GTGGTTCTTCTA//G | nonsynonymous | 1 | 0 |
| TENM4    | chr11 | 78482154/C//G            | nonsynonymous | 1 | 0 |

|          |       |                |               |   |   |
|----------|-------|----------------|---------------|---|---|
| ALKBH8   | chr11 | 107393142/T//C | synonymous    | 1 | 0 |
| ATM      | chr11 | 108183157/G//T | nonsynonymous | 1 | 0 |
| ANKK1    | chr11 | 113268050/C//T | nonsynonymous | 1 | 0 |
| USP2     | chr11 | 119228856/T//A | synonymous    | 1 | 0 |
| OR6M1    | chr11 | 123676331/T//C | nonsynonymous | 1 | 0 |
| TAPBPL   | chr12 | 6566726/C//CT  | nonsynonymous | 1 | 0 |
| SPSB2    | chr12 | 6981789/T//C   | nonsynonymous | 1 | 0 |
| TAS2R31  | chr12 | 11183722/A//C  | nonsynonymous | 1 | 0 |
| GUCY2C   | chr12 | 14775088/C//T  | nonsynonymous | 1 | 0 |
| OR10A7   | chr12 | 55615226/C//A  | nonsynonymous | 1 | 0 |
| OR6C76   | chr12 | 55820677/T//C  | nonsynonymous | 1 | 0 |
| PPP1CC   | chr12 | 111157952/A//G | synonymous    | 1 | 0 |
| NOS1     | chr12 | 117768223/T//C | nonsynonymous | 1 | 0 |
| RNF10    | chr12 | 121001319/A//G | nonsynonymous | 1 | 0 |
| HCAR2    | chr12 | 123187512/A//G | synonymous    | 1 | 0 |
| RNF17    | chr13 | 25439050/C//T  | nonsynonymous | 1 | 0 |
| SLITRK1  | chr13 | 84453725/C//A  | nonsynonymous | 1 | 0 |
| SLITRK1  | chr13 | 84454863/C//A  | nonsynonymous | 1 | 0 |
| NPAS3    | chr14 | 34263253/A//G  | synonymous    | 1 | 0 |
| ATG14    | chr14 | 55836534/C//T  | nonsynonymous | 1 | 0 |
| EXOC5    | chr14 | 57676458/T//C  | nonsynonymous | 1 | 0 |
| LTBP2    | chr14 | 74983598/G//A  | synonymous    | 1 | 0 |
| NRXN3    | chr14 | 79175990/G//A  | nonsynonymous | 1 | 0 |
| DIO2     | chr14 | 80669141/A//G  | nonsynonymous | 1 | 0 |
| RORA     | chr15 | 60792102/T//C  | nonsynonymous | 1 | 0 |
|          | chr15 | 72521976/G//A  | synonymous    | 1 | 0 |
| ABHD2    | chr15 | 89738612/G//T  | nonsynonymous | 1 | 0 |
| SULT1A1  | chr16 | 28620214/T//C  | synonymous    | 1 | 0 |
| BRD7     | chr16 | 50357576/A//C  | nonsynonymous | 1 | 0 |
| RSPRY1   | chr16 | 57238678/C//T  | synonymous    | 1 | 0 |
| HYDIN    | chr16 | 71103167/T//C  | synonymous    | 1 | 0 |
| MYH2     | chr17 | 10436622/G//A  | synonymous    | 1 | 0 |
| NARR     | chr17 | 27044539/G//A  | nonsynonymous | 1 | 0 |
| LHX1     | chr17 | 35300206/C//A  | synonymous    | 1 | 0 |
| PLEKHH3  | chr17 | 40825724/C//G  | nonsynonymous | 1 | 0 |
| RUNDC3A  | chr17 | 42390822/C//T  | nonsynonymous | 1 | 0 |
| GFAP     | chr17 | 42989040/C//G  | synonymous    | 1 | 0 |
| USP32    | chr17 | 58348713/T//C  | nonsynonymous | 1 | 0 |
| APOH     | chr17 | 64216729/T//C  | nonsynonymous | 1 | 0 |
| EPG5     | chr18 | 43496514/C//T  | synonymous    | 1 | 0 |
| DCC      | chr18 | 50918115/G//C  | nonsynonymous | 1 | 0 |
| CHAF1A   | chr19 | 4423354/A//G   | nonsynonymous | 1 | 0 |
| INSR     | chr19 | 7119582/C//A   | synonymous    | 1 | 0 |
| OR7A5    | chr19 | 14938194/G//T  | nonsynonymous | 1 | 0 |
| CYP4F11  | chr19 | 16038291/C//T  | nonsynonymous | 1 | 0 |
| B3GNT3   | chr19 | 17923047/T//A  | synonymous    | 1 | 0 |
| ZNF492   | chr19 | 22847644/G//A  | synonymous    | 1 | 0 |
| WDR87    | chr19 | 38384894/A//G  | synonymous    | 1 | 0 |
| RYR1     | chr19 | 38976446/C//T  | synonymous    | 1 | 0 |
| RYR1     | chr19 | 38987167/G//A  | nonsynonymous | 1 | 0 |
| CCDC155  | chr19 | 49900953/G//C  | nonsynonymous | 1 | 0 |
| ZNF649   | chr19 | 52394965/T//C  | nonsynonymous | 1 | 0 |
| ZNF880   | chr19 | 52887531/T//A  | nonsynonymous | 1 | 0 |
| NLRP4    | chr19 | 56392946/A//T  | nonsynonymous | 1 | 0 |
| ZSCAN18  | chr19 | 58596045/C//G  | synonymous    | 1 | 0 |
| DEFB125  | chr20 | 76658/C//T     | nonsynonymous | 1 | 0 |
| CFAP61   | chr20 | 20168646/G//T  | nonsynonymous | 1 | 0 |
| CFAP61   | chr20 | 20269464/G//A  | nonsynonymous | 1 | 0 |
| POFUT1   | chr20 | 30816144/A//G  | synonymous    | 1 | 0 |
| ARHGAP40 | chr20 | 37258182/G//T  | nonsynonymous | 1 | 0 |
| SLC9A8   | chr20 | 48467365/C//G  | nonsynonymous | 1 | 0 |
| DSCAM    | chr21 | 42080397/T//C  | nonsynonymous | 1 | 0 |
| P2RX6    | chr22 | 21370241/C//G  | nonsynonymous | 1 | 0 |
| TTC28    | chr22 | 28559231/C//A  | nonsynonymous | 1 | 0 |
| HUWE1    | chrX  | 53579632/C//T  | nonsynonymous | 1 | 0 |
| MAGEC2   | chrX  | 141291506/C//A | nonsynonymous | 1 | 0 |
| AFF2     | chrX  | 148044330/C//A | nonsynonymous | 1 | 0 |
| XPR1     | chr1  | 180805748/G//A | nonsynonymous | 0 | 1 |
| TTN      | chr2  | 179586761/C//T | synonymous    | 0 | 1 |
| PCDHA3   | chr5  | 140182767/C//T | nonsynonymous | 0 | 1 |

|          |       |                |               |   |   |
|----------|-------|----------------|---------------|---|---|
| PIGO     | chr9  | 35092715/G//C  | nonsynonymous | 0 | 1 |
| ADAMTS13 | chr9  | 136310819/G//T | nonsynonymous | 0 | 1 |
| DYNC1H1  | chr14 | 102500356/G//T | nonsynonymous | 0 | 1 |
| ZNF91    | chr19 | 23542561/T//C  | nonsynonymous | 0 | 1 |
| ZNF254   | chr19 | 24310353/C//T  | synonymous    | 0 | 1 |
| PLXNB3   | chrX  | 153040756/C//T | nonsynonymous | 0 | 1 |
| PRDM16   | chr1  | 3347635/G//T   | nonsynonymous | 0 | 1 |
| CEP85    | chr1  | 26597578/C//T  | nonsynonymous | 0 | 1 |
| CLCC1    | chr1  | 109477428/T//C | nonsynonymous | 0 | 1 |
| NES      | chr1  | 156645063/G//A | nonsynonymous | 0 | 1 |
| TOR1AIP1 | chr1  | 179851726/G//A | nonsynonymous | 0 | 1 |
| EFEMP1   | chr2  | 56144989/T//C  | nonsynonymous | 0 | 1 |
| PLEKHM3  | chr2  | 208795817/C//A | synonymous    | 0 | 1 |
| MUC4     | chr3  | 195501057/G//A | nonsynonymous | 0 | 1 |
| DCHS2    | chr4  | 155253722/A//T | nonsynonymous | 0 | 1 |
| TTC37    | chr5  | 94872524/A//G  | nonsynonymous | 0 | 1 |
| SLCO6A1  | chr5  | 101834355/C//T | nonsynonymous | 0 | 1 |
| PCDHA2   | chr5  | 140175344/C//T | synonymous    | 0 | 1 |
| PCLO     | chr7  | 82585022/T//C  | synonymous    | 0 | 1 |
| GAS2     | chr11 | 22707301/T//G  | nonsynonymous | 0 | 1 |
| FOLH1    | chr11 | 49194908/C//T  | nonsynonymous | 0 | 1 |
| FOXR1    | chr11 | 118850340/C//T | synonymous    | 0 | 1 |
| OPCML    | chr11 | 132527153/C//T | nonsynonymous | 0 | 1 |
| PDZRN4   | chr12 | 41582283/C//A  | nonsynonymous | 0 | 1 |
| TSPAN31  | chr12 | 58140385/A//G  | nonsynonymous | 0 | 1 |
| PKD1L3   | chr16 | 72012159/T//C  | nonsynonymous | 0 | 1 |
| SLFN12L  | chr17 | 33802334/C//T  | nonsynonymous | 0 | 1 |
| SLFN14   | chr17 | 33879846/C//A  | nonsynonymous | 0 | 1 |
| AZU1     | chr19 | 827877/G//A    | nonsynonymous | 0 | 1 |
| CLEC4M   | chr19 | 7831670/G//A   | nonsynonymous | 0 | 1 |
| CEACAM4  | chr19 | 42132216/A//C  | synonymous    | 0 | 1 |
| LRRN4    | chr20 | 6022756/T//A   | nonsynonymous | 0 | 1 |
| DZANK1   | chr20 | 18446024/C//A  | synonymous    | 0 | 1 |
| JADE3    | chrX  | 46918164/C//A  | synonymous    | 0 | 1 |
| POU3F4   | chrX  | 82763752/C//T  | synonymous    | 0 | 1 |
| B3GALT6  | chr1  | 1168576/G//A   | synonymous    | 1 | 0 |
| MEGF6    | chr1  | 3410666/C//A   | synonymous    | 1 | 0 |
| HNRNPCL2 | chr1  | 13183534/A//G  | synonymous    | 1 | 0 |
| SYF2     | chr1  | 25558947/T//C  | nonsynonymous | 1 | 0 |
| COL16A1  | chr1  | 32138199/G//T  | synonymous    | 1 | 0 |
| FAM167B  | chr1  | 32713237/G//T  | nonsynonymous | 1 | 0 |
| BSDC1    | chr1  | 32849489/T//C  | nonsynonymous | 1 | 0 |
| ZSCAN20  | chr1  | 33960288/A//G  | nonsynonymous | 1 | 0 |
| CSMD2    | chr1  | 34291330/G//A  | nonsynonymous | 1 | 0 |
| COL24A1  | chr1  | 86361738/C//A  | nonsynonymous | 1 | 0 |
| CNN3     | chr1  | 95368702/G//C  | nonsynonymous | 1 | 0 |
| KCNA2    | chr1  | 111147341/T//A | nonsynonymous | 1 | 0 |
| WDR3     | chr1  | 118495019/A//G | nonsynonymous | 1 | 0 |
| SPAG17   | chr1  | 118628611/G//T | nonsynonymous | 1 | 0 |
| TCHHL1   | chr1  | 152059721/G//A | nonsynonymous | 1 | 0 |
| SPRR3    | chr1  | 152975573/A//T | nonsynonymous | 1 | 0 |
| LRRC71   | chr1  | 156894307/G//A | synonymous    | 1 | 0 |
| ATP1A2   | chr1  | 160106081/C//A | synonymous    | 1 | 0 |
| DDR2     | chr1  | 162735830/C//A | nonsynonymous | 1 | 0 |
| F5       | chr1  | 169519201/A//G | synonymous    | 1 | 0 |
| CENPL    | chr1  | 173772481/T//C | nonsynonymous | 1 | 0 |
| TDRD5    | chr1  | 179604848/A//T | nonsynonymous | 1 | 0 |
| XPR1     | chr1  | 180794373/C//T | nonsynonymous | 1 | 0 |
| CAMSAP2  | chr1  | 200818733/G//T | nonsynonymous | 1 | 0 |
| TMEM9    | chr1  | 201104876/C//A | nonsynonymous | 1 | 0 |
| CAMK1G   | chr1  | 209776562/C//A | synonymous    | 1 | 0 |
| NEK2     | chr1  | 211848764/C//A | nonsynonymous | 1 | 0 |
| FAM71A   | chr1  | 212799866/T//C | synonymous    | 1 | 0 |
| CENPF    | chr1  | 214837081/C//T | nonsynonymous | 1 | 0 |
| KCNK2    | chr1  | 215408381/G//C | nonsynonymous | 1 | 0 |
| USH2A    | chr1  | 216595632/A//G | nonsynonymous | 1 | 0 |
| MIA3     | chr1  | 222802551/G//T | synonymous    | 1 | 0 |
| ENAH     | chr1  | 225707084/C//A | synonymous    | 1 | 0 |
| GJC2     | chr1  | 228346780/G//T | synonymous    | 1 | 0 |
| OBSCN    | chr1  | 228402078/G//A | nonsynonymous | 1 | 0 |

|          |      |                |               |   |   |
|----------|------|----------------|---------------|---|---|
| ZNF496   | chr1 | 247464483/C//T | nonsynonymous | 1 | 0 |
| OR2L3    | chr1 | 248224016/C//T | synonymous    | 1 | 0 |
| TPO      | chr2 | 1491590/C//A   | synonymous    | 1 | 0 |
| PXDN     | chr2 | 1652828/G//T   | synonymous    | 1 | 0 |
| APOB     | chr2 | 21236338/C//A  | nonsynonymous | 1 | 0 |
| PRR30    | chr2 | 27360134/G//T  | nonsynonymous | 1 | 0 |
| GALNT14  | chr2 | 31215831/C//A  | nonsynonymous | 1 | 0 |
| GPR75    | chr2 | 54081915/T//A  | synonymous    | 1 | 0 |
| CLHC1    | chr2 | 55436968/C//A  | nonsynonymous | 1 | 0 |
| NAT8B    | chr2 | 73928402/C//A  | nonsynonymous | 1 | 0 |
| ASTL     | chr2 | 96799702/A//G  | nonsynonymous | 1 | 0 |
| CNNM3    | chr2 | 97494360/C//A  | nonsynonymous | 1 | 0 |
| THSD7B   | chr2 | 138169422/C//A | nonsynonymous | 1 | 0 |
| GALNT13  | chr2 | 155115538/C//G | nonsynonymous | 1 | 0 |
| GALNT5   | chr2 | 158140951/A//T | nonsynonymous | 1 | 0 |
| SCN2A    | chr2 | 166246078/T//A | nonsynonymous | 1 | 0 |
| TTN      | chr2 | 179594202/C//A | synonymous    | 1 | 0 |
| ZNF804A  | chr2 | 185801972/C//A | nonsynonymous | 1 | 0 |
| PGAP1    | chr2 | 197767457/G//A | nonsynonymous | 1 | 0 |
| BOLL     | chr2 | 198593260/A//G | synonymous    | 1 | 0 |
|          | chr2 | 198650709/G//T | synonymous    | 1 | 0 |
| NBEAL1   | chr2 | 204067468/A//T | nonsynonymous | 1 | 0 |
| IHH      | chr2 | 219922284/C//A | nonsynonymous | 1 | 0 |
| NYAP2    | chr2 | 226447297/C//A | synonymous    | 1 | 0 |
| SPHKAP   | chr2 | 228886510/C//A | nonsynonymous | 1 | 0 |
| SNED1    | chr2 | 242005004/C//A | synonymous    | 1 | 0 |
| GAL3ST2  | chr2 | 242743699/C//A | synonymous    | 1 | 0 |
| FANCD2   | chr3 | 10130162/G//T  | nonsynonymous | 1 | 0 |
| FBLN2    | chr3 | 13659600/G//T  | nonsynonymous | 1 | 0 |
| CLEC3B   | chr3 | 45077295/C//G  | nonsynonymous | 1 | 0 |
| RTP3     | chr3 | 46541939/G//T  | nonsynonymous | 1 | 0 |
| ATRIP    | chr3 | 48501972/G//T  | nonsynonymous | 1 | 0 |
| DOCK3    | chr3 | 51376364/A//T  | nonsynonymous | 1 | 0 |
| ERC2     | chr3 | 56468430/C//T  | synonymous    | 1 | 0 |
| PRICKLE2 | chr3 | 64133312/C//G  | nonsynonymous | 1 | 0 |
| CNTN3    | chr3 | 74383939/C//A  | nonsynonymous | 1 | 0 |
| CNTN3    | chr3 | 74384027/C//A  | nonsynonymous | 1 | 0 |
| HTR1F    | chr3 | 88040781/C//A  | synonymous    | 1 | 0 |
| EPHA6    | chr3 | 96706732/C//A  | nonsynonymous | 1 | 0 |
| ABI3BP   | chr3 | 100568939/G//T | nonsynonymous | 1 | 0 |
| SEMA5B   | chr3 | 122630811/C//T | nonsynonymous | 1 | 0 |
| SEMA5B   | chr3 | 122632854/G//T | synonymous    | 1 | 0 |
| KALRN    | chr3 | 123813742/C//G | nonsynonymous | 1 | 0 |
| COL6A6   | chr3 | 130281926/G//T | nonsynonymous | 1 | 0 |
| ATP2C1   | chr3 | 130718450/T//C | nonsynonymous | 1 | 0 |
| TF       | chr3 | 133485155/C//T | nonsynonymous | 1 | 0 |
| FOXL2    | chr3 | 138664355/G//T | synonymous    | 1 | 0 |
| FOXL2NB  | chr3 | 138669304/C//T | nonsynonymous | 1 | 0 |
| MED12L   | chr3 | 151129089/G//C | nonsynonymous | 1 | 0 |
| SLC7A14  | chr3 | 170219111/C//A | nonsynonymous | 1 | 0 |
| TNIK     | chr3 | 170906583/C//A | nonsynonymous | 1 | 0 |
| B3GNT5   | chr3 | 182988663/A//T | synonymous    | 1 | 0 |
| MCF2L2   | chr3 | 183056683/G//T | nonsynonymous | 1 | 0 |
| CHRD     | chr3 | 184099522/C//T | nonsynonymous | 1 | 0 |
| APOD     | chr3 | 195300841/T//C | nonsynonymous | 1 | 0 |
| JAKMIP1  | chr4 | 6107341/C//A   | synonymous    | 1 | 0 |
| BOD1L1   | chr4 | 13606405/C//G  | nonsynonymous | 1 | 0 |
| ADGRA3   | chr4 | 22446639/C//A  | nonsynonymous | 1 | 0 |
| DCAF4L1  | chr4 | 41984902/A//T  | nonsynonymous | 1 | 0 |
| UGT2B15  | chr4 | 69513029/G//T  | synonymous    | 1 | 0 |
| DSPP     | chr4 | 88533335/G//T  | nonsynonymous | 1 | 0 |
| ADH6     | chr4 | 100131284/G//T | nonsynonymous | 1 | 0 |
| ETNPPL   | chr4 | 109675784/C//A | nonsynonymous | 1 | 0 |
| ANK2     | chr4 | 114279225/G//T | nonsynonymous | 1 | 0 |
| UGT8     | chr4 | 115597216/G//T | nonsynonymous | 1 | 0 |
| BBS12    | chr4 | 123663923/G//C | synonymous    | 1 | 0 |
| GATB     | chr4 | 152592353/C//T | synonymous    | 1 | 0 |
| FGA      | chr4 | 155507433/G//T | nonsynonymous | 1 | 0 |
| NPY2R    | chr4 | 156135819/G//C | nonsynonymous | 1 | 0 |
| GRIA2    | chr4 | 158257666/C//A | synonymous    | 1 | 0 |

|          |      |                |               |   |   |
|----------|------|----------------|---------------|---|---|
| PLEKHG4B | chr5 | 156333/C//G    | synonymous    | 1 | 0 |
| CDH18    | chr5 | 19747262/G//T  | nonsynonymous | 1 | 0 |
| ADAMTS12 | chr5 | 33576198/G//T  | synonymous    | 1 | 0 |
| ADAMTS12 | chr5 | 33576611/G//C  | nonsynonymous | 1 | 0 |
| MROH2B   | chr5 | 41065442/T//C  | nonsynonymous | 1 | 0 |
| HCN1     | chr5 | 45396723/G//A  | synonymous    | 1 | 0 |
| ZSWIM6   | chr5 | 60837770/G//T  | synonymous    | 1 | 0 |
| HTR1A    | chr5 | 63256861/G//T  | nonsynonymous | 1 | 0 |
| MAP1B    | chr5 | 71491674/C//T  | nonsynonymous | 1 | 0 |
| VCAN     | chr5 | 82833085/C//A  | synonymous    | 1 | 0 |
| PJA2     | chr5 | 108680412/G//A | nonsynonymous | 1 | 0 |
| WDR36    | chr5 | 110462709/A//T | synonymous    | 1 | 0 |
| TRIM36   | chr5 | 114472700/T//A | nonsynonymous | 1 | 0 |
| CDO1     | chr5 | 115152025/C//A | nonsynonymous | 1 | 0 |
| DMXL1    | chr5 | 118506843/A//G | synonymous    | 1 | 0 |
| FTMT     | chr5 | 121188080/G//T | nonsynonymous | 1 | 0 |
| TXNDC15  | chr5 | 134210133/G//T | nonsynonymous | 1 | 0 |
| KDM3B    | chr5 | 137721930/G//A | nonsynonymous | 1 | 0 |
| KDM3B    | chr5 | 137727794/G//T | nonsynonymous | 1 | 0 |
| HSPA9    | chr5 | 137895563/T//A | nonsynonymous | 1 | 0 |
| CXXC5    | chr5 | 139060567/G//C | nonsynonymous | 1 | 0 |
| NRG2     | chr5 | 139235313/C//A | nonsynonymous | 1 | 0 |
| PCDHB14  | chr5 | 140603519/G//T | nonsynonymous | 1 | 0 |
| PCDHGA3  | chr5 | 140724198/C//A | nonsynonymous | 1 | 0 |
| PCDHGA8  | chr5 | 140773365/G//A | nonsynonymous | 1 | 0 |
| PCDHGA8  | chr5 | 140773978/C//A | nonsynonymous | 1 | 0 |
| FAM71B   | chr5 | 156589774/G//T | nonsynonymous | 1 | 0 |
| TENM2    | chr5 | 167653146/C//A | nonsynonymous | 1 | 0 |
| TENM2    | chr5 | 167675203/C//A | nonsynonymous | 1 | 0 |
| DOCK2    | chr5 | 169081448/C//A | nonsynonymous | 1 | 0 |
| DOCK2    | chr5 | 169108886/G//T | synonymous    | 1 | 0 |
| DOCK2    | chr5 | 169435558/C//G | nonsynonymous | 1 | 0 |
| DOCK2    | chr5 | 169472834/C//A | synonymous    | 1 | 0 |
| SH3PXD2B | chr5 | 171765885/T//C | nonsynonymous | 1 | 0 |
| CDHR2    | chr5 | 176002745/T//A | nonsynonymous | 1 | 0 |
| GPRIN1   | chr5 | 176026433/C//A | nonsynonymous | 1 | 0 |
| HK3      | chr5 | 176317818/C//T | synonymous    | 1 | 0 |
| ZNF879   | chr5 | 178460490/G//C | nonsynonymous | 1 | 0 |
| ADAMTS2  | chr5 | 178770995/C//T | nonsynonymous | 1 | 0 |
| OR12D3   | chr6 | 29343016/C//A  | nonsynonymous | 1 | 0 |
| HLA-G    | chr6 | 29796354/C//A  | nonsynonymous | 1 | 0 |
| MUC22    | chr6 | 31000298/C//A  | synonymous    | 1 | 0 |
| UHRF1BP1 | chr6 | 34827112/G//A  | synonymous    | 1 | 0 |
| TFEB     | chr6 | 41652628/C//A  | synonymous    | 1 | 0 |
| FRS3     | chr6 | 41740673/C//A  | nonsynonymous | 1 | 0 |
| XPO5     | chr6 | 43517301/C//A  | synonymous    | 1 | 0 |
| AARS2    | chr6 | 44270880/C//A  | synonymous    | 1 | 0 |
| TDRD6    | chr6 | 46658964/C//T  | synonymous    | 1 | 0 |
| ADGRF5   | chr6 | 46826584/C//A  | nonsynonymous | 1 | 0 |
| OPN5     | chr6 | 47759558/A//G  | nonsynonymous | 1 | 0 |
| IL17A    | chr6 | 52054027/G//T  | synonymous    | 1 | 0 |
| GSTA3    | chr6 | 52764805/G//T  | nonsynonymous | 1 | 0 |
| WISP3    | chr6 | 112375615/C//A | synonymous    | 1 | 0 |
| DSE      | chr6 | 116720731/G//T | nonsynonymous | 1 | 0 |
| TRDN     | chr6 | 123786098/G//C | nonsynonymous | 1 | 0 |
| TAAR6    | chr6 | 132892429/A//T | nonsynonymous | 1 | 0 |
| VNN1     | chr6 | 133004345/G//T | synonymous    | 1 | 0 |
| MTFR2    | chr6 | 136562750/C//A | nonsynonymous | 1 | 0 |
| THBS2    | chr6 | 169632298/G//C | synonymous    | 1 | 0 |
| THBS2    | chr6 | 169648685/C//T | nonsynonymous | 1 | 0 |
| ELFN1    | chr7 | 1785692/C//A   | nonsynonymous | 1 | 0 |
| HDAC9    | chr7 | 18868847/C//A  | synonymous    | 1 | 0 |
| RAPGEF5  | chr7 | 22200155/G//A  | nonsynonymous | 1 | 0 |
| NEUROD6  | chr7 | 31378020/C//A  | nonsynonymous | 1 | 0 |
| NPSR1    | chr7 | 34698068/C//A  | nonsynonymous | 1 | 0 |
| TBX20    | chr7 | 35288377/C//A  | nonsynonymous | 1 | 0 |
| TBX20    | chr7 | 35288392/C//A  | nonsynonymous | 1 | 0 |
| AOAH     | chr7 | 36671674/C//A  | synonymous    | 1 | 0 |
| VPS41    | chr7 | 38937685/C//A  | synonymous    | 1 | 0 |
| MYL7     | chr7 | 44180002/T//A  | nonsynonymous | 1 | 0 |



|           |       |                        |               |   |   |
|-----------|-------|------------------------|---------------|---|---|
| CAMK2B    | chr7  | 44260498/G//T          | synonymous    | 1 | 0 |
| ADCY1     | chr7  | 45744109/A//G          | synonymous    | 1 | 0 |
| C7orf72   | chr7  | 50198773/G//C          | synonymous    | 1 | 0 |
| GRB10     | chr7  | 50672070/C//A          | nonsynonymous | 1 | 0 |
| POM121L12 | chr7  | 53103614/C//A          | nonsynonymous | 1 | 0 |
| EGFR      | chr7  | 55248998/A//ATGGCCAGCG | nonsynonymous | 1 | 0 |
| PCLO      | chr7  | 82451939/C//A          | nonsynonymous | 1 | 0 |
| GATAD1    | chr7  | 92085804/G//C          | nonsynonymous | 1 | 0 |
| COL1A2    | chr7  | 94039106/C//A          | synonymous    | 1 | 0 |
| LMTK2     | chr7  | 97822091/C//T          | nonsynonymous | 1 | 0 |
| ZAN       | chr7  | 100385618/G//T         | nonsynonymous | 1 | 0 |
| PPP1R3A   | chr7  | 113519710/T//A         | synonymous    | 1 | 0 |
| FOXP2     | chr7  | 114304481/C//A         | nonsynonymous | 1 | 0 |
| CPED1     | chr7  | 120765938/G//A         | nonsynonymous | 1 | 0 |
| DPP6      | chr7  | 154664333/G//T         | nonsynonymous | 1 | 0 |
| DLGAP2    | chr8  | 1616573/C//T           | nonsynonymous | 1 | 0 |
| CSMD1     | chr8  | 2796150/A//T           | nonsynonymous | 1 | 0 |
| CSMD1     | chr8  | 3059189/A//T           | nonsynonymous | 1 | 0 |
| CSMD1     | chr8  | 3072084/G//T           | nonsynonymous | 1 | 0 |
| MSR1      | chr8  | 16012654/C//A          | nonsynonymous | 1 | 0 |
| CLVS1     | chr8  | 62212477/A//G          | nonsynonymous | 1 | 0 |
| MSC-AS1   | chr8  | 72755767/A//G          | synonymous    | 1 | 0 |
| ZFHX4     | chr8  | 77618916/T//A          | synonymous    | 1 | 0 |
| ZFHX4     | chr8  | 77767187/G//T          | nonsynonymous | 1 | 0 |
| CNGB3     | chr8  | 87588156/G//T          | nonsynonymous | 1 | 0 |
| NECAB1    | chr8  | 91836996/T//C          | nonsynonymous | 1 | 0 |
| SLC26A7   | chr8  | 92307752/G//C          | synonymous    | 1 | 0 |
| ERICH5    | chr8  | 99101434/A//G          | synonymous    | 1 | 0 |
| UBR5      | chr8  | 103316283/G//A         | nonsynonymous | 1 | 0 |
| TMEM74    | chr8  | 109796802/A//G         | nonsynonymous | 1 | 0 |
| CSMD3     | chr8  | 113842019/C//A         | nonsynonymous | 1 | 0 |
| TRPS1     | chr8  | 116426388/G//T         | nonsynonymous | 1 | 0 |
| SLC30A8   | chr8  | 118174072/G//T         | nonsynonymous | 1 | 0 |
| FER1L6    | chr8  | 125022918/C//A         | nonsynonymous | 1 | 0 |
| FER1L6    | chr8  | 125088524/G//T         | nonsynonymous | 1 | 0 |
| PLEC      | chr8  | 144998364/C//A         | synonymous    | 1 | 0 |
| KCNV2     | chr9  | 2718387/C//T           | synonymous    | 1 | 0 |
| TEK       | chr9  | 27185489/G//C          | nonsynonymous | 1 | 0 |
| KIF24     | chr9  | 34306440/C//A          | nonsynonymous | 1 | 0 |
| TRPM3     | chr9  | 73736142/G//T          | synonymous    | 1 | 0 |
| PRUNE2    | chr9  | 79320709/C//G          | nonsynonymous | 1 | 0 |
| SPATA31E1 | chr9  | 90502985/C//A          | nonsynonymous | 1 | 0 |
| WNK2      | chr9  | 96054798/C//A          | nonsynonymous | 1 | 0 |
| NUTM2F    | chr9  | 97084497/G//T          | nonsynonymous | 1 | 0 |
| PTCH1     | chr9  | 98221907/G//C          | nonsynonymous | 1 | 0 |
| COL15A1   | chr9  | 101778409/G//T         | synonymous    | 1 | 0 |
| ACTL7A    | chr9  | 111624863/C//A         | synonymous    | 1 | 0 |
| ASTN2     | chr9  | 119976935/G//C         | nonsynonymous | 1 | 0 |
| BRINP1    | chr9  | 122075437/G//A         | nonsynonymous | 1 | 0 |
| OR1L8     | chr9  | 125330043/G//A         | synonymous    | 1 | 0 |
| LRRC8A    | chr9  | 131669842/G//T         | synonymous    | 1 | 0 |
| GBGT1     | chr9  | 136029461/G//T         | synonymous    | 1 | 0 |
| SLC2A6    | chr9  | 136338284/G//T         | nonsynonymous | 1 | 0 |
| COL5A1    | chr9  | 137619128/T//C         | nonsynonymous | 1 | 0 |
| ITIH5     | chr10 | 7605124/C//A           | synonymous    | 1 | 0 |
| GATA3     | chr10 | 8097754/G//C           | nonsynonymous | 1 | 0 |
| TMEM72    | chr10 | 45430574/C//G          | nonsynonymous | 1 | 0 |
| ARHGAP22  | chr10 | 49791062/C//A          | nonsynonymous | 1 | 0 |
| KCNMA1    | chr10 | 78839244/T//A          | nonsynonymous | 1 | 0 |
| PPP1R3C   | chr10 | 93389963/G//T          | synonymous    | 1 | 0 |
| DNMBP     | chr10 | 101636846/C//G         | synonymous    | 1 | 0 |
| PDCD11    | chr10 | 105182750/G//T         | nonsynonymous | 1 | 0 |
| PNLIPRP3  | chr10 | 118196365/C//A         | synonymous    | 1 | 0 |
| RGS10     | chr10 | 121286823/A//G         | nonsynonymous | 1 | 0 |
| ADAM12    | chr10 | 127786997/C//A         | synonymous    | 1 | 0 |
| STIM1     | chr11 | 4091332/C//T           | synonymous    | 1 | 0 |
| OR52K2    | chr11 | 4471089/C//A           | nonsynonymous | 1 | 0 |
| OR2AG2    | chr11 | 6789744/A//T           | nonsynonymous | 1 | 0 |
| OVCH2     | chr11 | 7723358/C//T           | nonsynonymous | 1 | 0 |
| TUB       | chr11 | 8122512/T//C           | nonsynonymous | 1 | 0 |

|          |       |                |               |   |   |
|----------|-------|----------------|---------------|---|---|
| USH1C    | chr11 | 17547964/G//T  | nonsynonymous | 1 | 0 |
| LUZP2    | chr11 | 24927546/T//A  | nonsynonymous | 1 | 0 |
| CAT      | chr11 | 34489905/A//T  | nonsynonymous | 1 | 0 |
| APLNR    | chr11 | 57003672/C//A  | synonymous    | 1 | 0 |
| OR4D9    | chr11 | 59282539/G//T  | nonsynonymous | 1 | 0 |
| GIF      | chr11 | 59609965/G//T  | synonymous    | 1 | 0 |
| MS4A2    | chr11 | 59857230/C//A  | nonsynonymous | 1 | 0 |
| MYRF     | chr11 | 61541451/C//A  | synonymous    | 1 | 0 |
| ATG2A    | chr11 | 64665380/G//C  | nonsynonymous | 1 | 0 |
| FGF3     | chr11 | 69625346/G//T  | synonymous    | 1 | 0 |
| C2CD3    | chr11 | 73795993/C//T  | synonymous    | 1 | 0 |
| TYR      | chr11 | 88911653/T//C  | nonsynonymous | 1 | 0 |
| C11orf88 | chr11 | 111386248/C//A | nonsynonymous | 1 | 0 |
| DIXDC1   | chr11 | 111863237/C//G | nonsynonymous | 1 | 0 |
| ANKK1    | chr11 | 113267975/T//A | nonsynonymous | 1 | 0 |
| CEP164   | chr11 | 117233148/A//T | nonsynonymous | 1 | 0 |
| RNF26    | chr11 | 119206828/G//T | synonymous    | 1 | 0 |
| C11orf63 | chr11 | 122774743/A//C | nonsynonymous | 1 | 0 |
| C11orf63 | chr11 | 122805772/A//T | nonsynonymous | 1 | 0 |
| ZNF202   | chr11 | 123601558/C//A | nonsynonymous | 1 | 0 |
| OR10S1   | chr11 | 123847817/G//A | synonymous    | 1 | 0 |
| ROBO4    | chr11 | 124764231/G//T | nonsynonymous | 1 | 0 |
| KCNJ5    | chr11 | 128781541/G//T | nonsynonymous | 1 | 0 |
| ADAMTS15 | chr11 | 130319347/G//T | nonsynonymous | 1 | 0 |
| DCP1B    | chr12 | 2058395/C//A   | nonsynonymous | 1 | 0 |
| VWF      | chr12 | 6131201/C//A   | nonsynonymous | 1 | 0 |
| CDKN1B   | chr12 | 12871184/G//T  | synonymous    | 1 | 0 |
| SLCO1A2  | chr12 | 21459918/C//A  | nonsynonymous | 1 | 0 |
| FAR2     | chr12 | 29423556/G//T  | nonsynonymous | 1 | 0 |
| OVCH1    | chr12 | 29580528/A//G  | synonymous    | 1 | 0 |
| H3F3C    | chr12 | 31944542/A//T  | synonymous    | 1 | 0 |
| ARID2    | chr12 | 46245192/C//T  | nonsynonymous | 1 | 0 |
| KRT6A    | chr12 | 52882211/G//C  | nonsynonymous | 1 | 0 |
| MON2     | chr12 | 62974125/C//T  | nonsynonymous | 1 | 0 |
| OTOGL    | chr12 | 80661089/C//A  | nonsynonymous | 1 | 0 |
| PTPRQ    | chr12 | 80936104/G//T  | nonsynonymous | 1 | 0 |
| MYF5     | chr12 | 81110965/G//C  | synonymous    | 1 | 0 |
| AMDHD1   | chr12 | 96359480/G//A  | nonsynonymous | 1 | 0 |
| PAH      | chr12 | 103232978/C//T | nonsynonymous | 1 | 0 |
| WASHC4   | chr12 | 105501516/G//A | synonymous    | 1 | 0 |
| ASCL4    | chr12 | 108169355/C//A | nonsynonymous | 1 | 0 |
| NOS1     | chr12 | 117665296/G//T | nonsynonymous | 1 | 0 |
| SLC15A4  | chr12 | 129283880/C//A | synonymous    | 1 | 0 |
| RIMBP2   | chr12 | 130921734/G//T | nonsynonymous | 1 | 0 |
| SLC46A3  | chr13 | 29278236/C//A  | nonsynonymous | 1 | 0 |
| SOHLH2   | chr13 | 36747888/G//A  | nonsynonymous | 1 | 0 |
| LACC1    | chr13 | 44462933/G//T  | synonymous    | 1 | 0 |
| GTF2F2   | chr13 | 45857588/G//T  | nonsynonymous | 1 | 0 |
| PCDH8    | chr13 | 53421120/C//A  | synonymous    | 1 | 0 |
| SLITRK1  | chr13 | 84454647/G//T  | nonsynonymous | 1 | 0 |
| NALCN    | chr13 | 101844397/C//A | nonsynonymous | 1 | 0 |
| OR11G2   | chr14 | 20666187/T//A  | synonymous    | 1 | 0 |
| OR11H6   | chr14 | 20692552/C//A  | synonymous    | 1 | 0 |
| KLHL33   | chr14 | 20898240/G//T  | nonsynonymous | 1 | 0 |
| SLC22A17 | chr14 | 23815903/C//A  | nonsynonymous | 1 | 0 |
| JPH4     | chr14 | 24040150/C//A  | nonsynonymous | 1 | 0 |
| NFATC4   | chr14 | 24838754/G//T  | nonsynonymous | 1 | 0 |
| RALGAPA1 | chr14 | 36190936/C//A  | nonsynonymous | 1 | 0 |
| KCNH5    | chr14 | 63174550/G//T  | synonymous    | 1 | 0 |
| RIN3     | chr14 | 93125603/G//T  | synonymous    | 1 | 0 |
| UNC79    | chr14 | 94158105/T//A  | nonsynonymous | 1 | 0 |
| AHNAK2   | chr14 | 105417672/C//A | nonsynonymous | 1 | 0 |
| APBA2    | chr15 | 29393893/G//A  | nonsynonymous | 1 | 0 |
| TRPM1    | chr15 | 31323263/G//T  | nonsynonymous | 1 | 0 |
| TCF12    | chr15 | 57526270/C//T  | nonsynonymous | 1 | 0 |
| CILP     | chr15 | 65489210/G//C  | synonymous    | 1 | 0 |
| ADAMTS7  | chr15 | 79066539/G//T  | nonsynonymous | 1 | 0 |
| AP3B2    | chr15 | 83328734/T//A  | synonymous    | 1 | 0 |
| IQGAP1   | chr15 | 90996362/A//G  | nonsynonymous | 1 | 0 |
| BLM      | chr15 | 91354534/A//G  | nonsynonymous | 1 | 0 |

|          |       |               |               |   |   |
|----------|-------|---------------|---------------|---|---|
| CASKIN1  | chr16 | 2235383/G//T  | nonsynonymous | 1 | 0 |
| ANKS4B   | chr16 | 21261756/G//A | nonsynonymous | 1 | 0 |
| IL21R    | chr16 | 27457321/C//G | synonymous    | 1 | 0 |
| SPN      | chr16 | 29675497/C//A | nonsynonymous | 1 | 0 |
| ITGAD    | chr16 | 31424208/C//T | nonsynonymous | 1 | 0 |
| SNX20    | chr16 | 50711300/A//G | synonymous    | 1 | 0 |
| IRX6     | chr16 | 55360410/A//T | nonsynonymous | 1 | 0 |
| PRMT7    | chr16 | 68349877/G//T | synonymous    | 1 | 0 |
| PLCG2    | chr16 | 81927380/G//T | nonsynonymous | 1 | 0 |
| GSG2     | chr17 | 3627592/G//T  | synonymous    | 1 | 0 |
| MINK1    | chr17 | 4795446/G//A  | synonymous    | 1 | 0 |
| GAS7     | chr17 | 9830049/C//A  | nonsynonymous | 1 | 0 |
| MYH8     | chr17 | 10301821/T//A | nonsynonymous | 1 | 0 |
| MYH3     | chr17 | 10544395/T//C | synonymous    | 1 | 0 |
| DNAH9    | chr17 | 11535997/C//G | nonsynonymous | 1 | 0 |
| TRPV2    | chr17 | 16332275/C//G | nonsynonymous | 1 | 0 |
| DRC3     | chr17 | 17891393/G//A | nonsynonymous | 1 | 0 |
| ZNF286B  | chr17 | 18565401/C//A | nonsynonymous | 1 | 0 |
| MTRNR2L1 | chr17 | 22023531/G//T | synonymous    | 1 | 0 |
| PIPOX    | chr17 | 27371958/C//A | synonymous    | 1 | 0 |
| KRT23    | chr17 | 39092544/G//T | synonymous    | 1 | 0 |
| GHDC     | chr17 | 40344570/G//A | nonsynonymous | 1 | 0 |
| CNTNAP1  | chr17 | 40842952/A//G | nonsynonymous | 1 | 0 |
| RAMP2    | chr17 | 40914638/G//T | nonsynonymous | 1 | 0 |
| CCDC43   | chr17 | 42767139/G//T | synonymous    | 1 | 0 |
| MAPT     | chr17 | 44051821/C//A | synonymous    | 1 | 0 |
| KANSL1   | chr17 | 44171997/C//A | nonsynonymous | 1 | 0 |
| KIF2B    | chr17 | 51901193/G//T | nonsynonymous | 1 | 0 |
| AKAP1    | chr17 | 55191953/G//C | nonsynonymous | 1 | 0 |
| MTMR4    | chr17 | 56572961/C//A | nonsynonymous | 1 | 0 |
| SMG8     | chr17 | 57288473/A//T | nonsynonymous | 1 | 0 |
| MED13    | chr17 | 60038953/G//T | nonsynonymous | 1 | 0 |
| RPTOR    | chr17 | 78820305/A//T | synonymous    | 1 | 0 |
| NDC80    | chr18 | 2573036/G//A  | nonsynonymous | 1 | 0 |
| ANKRD30B | chr18 | 14799227/C//A | synonymous    | 1 | 0 |
| GALNT1   | chr18 | 33289771/G//T | synonymous    | 1 | 0 |
| ATP8B1   | chr18 | 55328516/C//A | nonsynonymous | 1 | 0 |
| THEG     | chr19 | 362382/G//T   | nonsynonymous | 1 | 0 |
| MISP     | chr19 | 757525/C//T   | synonymous    | 1 | 0 |
| ATCAY    | chr19 | 3924661/T//C  | synonymous    | 1 | 0 |
| FUT6     | chr19 | 5832095/A//T  | nonsynonymous | 1 | 0 |
| ACTL9    | chr19 | 8807816/G//T  | nonsynonymous | 1 | 0 |
| MUC16    | chr19 | 9004911/G//T  | nonsynonymous | 1 | 0 |
| MUC16    | chr19 | 9046298/G//T  | nonsynonymous | 1 | 0 |
| OR1M1    | chr19 | 9204092/C//G  | nonsynonymous | 1 | 0 |
| ZNF699   | chr19 | 9407093/G//A  | synonymous    | 1 | 0 |
| MRPL4    | chr19 | 10363327/G//A | synonymous    | 1 | 0 |
| MRPL4    | chr19 | 10363330/C//T | synonymous    | 1 | 0 |
| ZNF763   | chr19 | 12089637/C//T | nonsynonymous | 1 | 0 |
| C19orf43 | chr19 | 12845180/C//G | nonsynonymous | 1 | 0 |
| AKAP8    | chr19 | 15483039/G//A | synonymous    | 1 | 0 |
| ZNF429   | chr19 | 21720133/T//A | nonsynonymous | 1 | 0 |
| ZNF91    | chr19 | 23542898/A//G | synonymous    | 1 | 0 |
| TSHZ3    | chr19 | 31769962/G//T | nonsynonymous | 1 | 0 |
| APLP1    | chr19 | 36362844/A//T | synonymous    | 1 | 0 |
| LRFN3    | chr19 | 36430514/G//T | nonsynonymous | 1 | 0 |
| RYR1     | chr19 | 38958415/G//T | nonsynonymous | 1 | 0 |
| RYR1     | chr19 | 38987525/C//A | nonsynonymous | 1 | 0 |
| PPP1R13L | chr19 | 45900309/C//A | nonsynonymous | 1 | 0 |
| HIF3A    | chr19 | 46823803/C//A | nonsynonymous | 1 | 0 |
| PLEKHA4  | chr19 | 49362878/G//T | synonymous    | 1 | 0 |
| SCAF1    | chr19 | 50156939/G//T | nonsynonymous | 1 | 0 |
| SYT3     | chr19 | 51128491/G//T | nonsynonymous | 1 | 0 |
| SYT3     | chr19 | 51140583/G//T | nonsynonymous | 1 | 0 |
| KLK8     | chr19 | 51501014/G//T | nonsynonymous | 1 | 0 |
| SIGLECL1 | chr19 | 51768706/C//A | nonsynonymous | 1 | 0 |
| SIGLEC6  | chr19 | 52034144/C//A | nonsynonymous | 1 | 0 |
| ERVV-2   | chr19 | 53554186/G//A | synonymous    | 1 | 0 |
| DPRX     | chr19 | 54140044/C//A | synonymous    | 1 | 0 |
| MBOAT7   | chr19 | 54684757/C//A | nonsynonymous | 1 | 0 |

|          |       |                  |               |   |   |
|----------|-------|------------------|---------------|---|---|
| LILRB5   | chr19 | 54760477/G//T    | nonsynonymous | 1 | 0 |
| BRSK1    | chr19 | 55814091/G//T    | nonsynonymous | 1 | 0 |
| TGM3     | chr20 | 2312900/C//T     | nonsynonymous | 1 | 0 |
| LZTS3    | chr20 | 3146925/G//A     | nonsynonymous | 1 | 0 |
| ACSS2    | chr20 | 33470606/G//T    | nonsynonymous | 1 | 0 |
| SAMHD1   | chr20 | 35580166/T//A    | synonymous    | 1 | 0 |
| SEMG1    | chr20 | 43836863/G//T    | nonsynonymous | 1 | 0 |
| ZNF335   | chr20 | 44580854/G//A    | nonsynonymous | 1 | 0 |
| PREX1    | chr20 | 47317331/G//A    | nonsynonymous | 1 | 0 |
| KCNB1    | chr20 | 47990987/C//A    | nonsynonymous | 1 | 0 |
| NFATC2   | chr20 | 50140068/C//A    | nonsynonymous | 1 | 0 |
| PCK1     | chr20 | 56136600/A//G    | nonsynonymous | 1 | 0 |
| DIDO1    | chr20 | 61512589/C//A    | synonymous    | 1 | 0 |
| BIRC7    | chr20 | 61867557/A//T    | nonsynonymous | 1 | 0 |
| COL20A1  | chr20 | 61959838/C//T    | nonsynonymous | 1 | 0 |
| ZGPAT    | chr20 | 62365043/G//T    | nonsynonymous | 1 | 0 |
| TIAM1    | chr21 | 32582473/C//A    | nonsynonymous | 1 | 0 |
| SON      | chr21 | 34925936/A//G    | nonsynonymous | 1 | 0 |
| PFKL     | chr21 | 45738454/G//T    | synonymous    | 1 | 0 |
| COL6A2   | chr21 | 47538593/G//C    | synonymous    | 1 | 0 |
| AIFM3    | chr22 | 21331055/G//A    | synonymous    | 1 | 0 |
| SLC7A4   | chr22 | 21384612/G//T    | synonymous    | 1 | 0 |
| MYO18B   | chr22 | 26228924/C//A    | nonsynonymous | 1 | 0 |
| SEZ6L    | chr22 | 26688690/C//A    | nonsynonymous | 1 | 0 |
| TOM1     | chr22 | 35723381/G//T    | nonsynonymous | 1 | 0 |
| CACNA11  | chr22 | 40055701/G//A    | nonsynonymous | 1 | 0 |
| EFCAB6   | chr22 | 44168906/C//A    | nonsynonymous | 1 | 0 |
| PHF21B   | chr22 | 45291935/A//T    | nonsynonymous | 1 | 0 |
| ARHGAP6  | chrX  | 11206969/C//G    | nonsynonymous | 1 | 0 |
| GRPR     | chrX  | 16170562/G//A    | nonsynonymous | 1 | 0 |
| SSX3     | chrX  | 48214690/A//C    | synonymous    | 1 | 0 |
| SLC38A5  | chrX  | 48325429/G//C    | nonsynonymous | 1 | 0 |
| HEPH     | chrX  | 65393529/C//A    | nonsynonymous | 1 | 0 |
| HEPH     | chrX  | 65478712/G//T    | nonsynonymous | 1 | 0 |
| OTUD6A   | chrX  | 69282407/A//G    | nonsynonymous | 1 | 0 |
| PLP1     | chrX  | 103042768/G//T   | synonymous    | 1 | 0 |
| COL4A5   | chrX  | 107824257/T//A   | synonymous    | 1 | 0 |
| GUCY2F   | chrX  | 108625425/G//A   | synonymous    | 1 | 0 |
| WDR44    | chrX  | 117576266/A//T   | synonymous    | 1 | 0 |
| CXorf56  | chrX  | 118699328/G//A   | synonymous    | 1 | 0 |
| SH2D1A   | chrX  | 123505280/T//A   | synonymous    | 1 | 0 |
| SPANXN1  | chrX  | 144337272/G//T   | nonsynonymous | 1 | 0 |
| RENBP    | chrX  | 153208443/G//T   | nonsynonymous | 1 | 0 |
| PLEKHN1  | chr1  | 908396/C//T      | synonymous    | 1 | 0 |
| ZSCAN20  | chr1  | 33958975/C//T    | nonsynonymous | 1 | 0 |
| TESK2    | chr1  | 45810729/C//T    | nonsynonymous | 1 | 0 |
| DOCK7    | chr1  | 62958451/CCTT//C | nonsynonymous | 1 | 0 |
| WDR77    | chr1  | 111985985/C//T   | synonymous    | 1 | 0 |
| MAGI3    | chr1  | 114193810/C//T   | nonsynonymous | 1 | 0 |
| ARHGAP30 | chr1  | 161022528/C//T   | nonsynonymous | 1 | 0 |
| NFASC    | chr1  | 204985634/G//A   | synonymous    | 1 | 0 |
| CENPF    | chr1  | 214814779/G//A   | nonsynonymous | 1 | 0 |
| ALMS1    | chr2  | 73651768/G//A    | synonymous    | 1 | 0 |
| RFX8     | chr2  | 102029526/C//T   | nonsynonymous | 1 | 0 |
| DPP10    | chr2  | 116525941/A//G   | synonymous    | 1 | 0 |
| NRP2     | chr2  | 206628626/G//A   | nonsynonymous | 1 | 0 |
| OR6B3    | chr2  | 240984556/C//T   | nonsynonymous | 1 | 0 |
| COPS9    | chr2  | 241070449/C//T   | synonymous    | 1 | 0 |
| PLXNB1   | chr3  | 48461058/C//G    | nonsynonymous | 1 | 0 |
| HTR3C    | chr3  | 183778014/G//A   | nonsynonymous | 1 | 0 |
| GBA3     | chr4  | 22749270/G//A    | nonsynonymous | 1 | 0 |
| CDH9     | chr5  | 26881414/G//A    | nonsynonymous | 1 | 0 |
| DHFR     | chr5  | 79933820/G//A    | nonsynonymous | 1 | 0 |
| NRG2     | chr5  | 139231286/G//A   | nonsynonymous | 1 | 0 |
| CD14     | chr5  | 140012308/C//T   | synonymous    | 1 | 0 |
| ABLIM3   | chr5  | 148620240/G//T   | synonymous    | 1 | 0 |
| CAMK2A   | chr5  | 149630277/C//T   | nonsynonymous | 1 | 0 |
| PHACTR1  | chr6  | 13287430/A//T    | synonymous    | 1 | 0 |
| KIF13A   | chr6  | 17852181/C//A    | synonymous    | 1 | 0 |
| RIMS1    | chr6  | 72806843/G//A    | nonsynonymous | 1 | 0 |

|           |       |                            |               |   |   |
|-----------|-------|----------------------------|---------------|---|---|
| FAM20C    | chr7  | 286403/C//G                | nonsynonymous | 1 | 0 |
| ABCB1     | chr7  | 87138606/G//A              | synonymous    | 1 | 0 |
| POT1      | chr7  | 124510981/C//T             | nonsynonymous | 1 | 0 |
| HR        | chr8  | 21977371/G//A              | nonsynonymous | 1 | 0 |
| DCAF4L2   | chr8  | 88886173/G//A              | synonymous    | 1 | 0 |
| ACTL7B    | chr9  | 111617548/G//A             | synonymous    | 1 | 0 |
| EHF       | chr11 | 34668200/C//G              | synonymous    | 1 | 0 |
| OR5D13    | chr11 | 55541762/G//A              | synonymous    | 1 | 0 |
| SART1     | chr11 | 65743897/G//A              | nonsynonymous | 1 | 0 |
| CCDC89    | chr11 | 85396627/A//G              | nonsynonymous | 1 | 0 |
| NCAPD3    | chr11 | 134029786/C//T             | nonsynonymous | 1 | 0 |
| CD163     | chr12 | 7640095/C//G               | nonsynonymous | 1 | 0 |
| BICD1     | chr12 | 32487463/C//T              | nonsynonymous | 1 | 0 |
| TRPC4     | chr13 | 38237650/C//A              | nonsynonymous | 1 | 0 |
| TMCO3     | chr13 | 114154294/G//T             | nonsynonymous | 1 | 0 |
| HIF1A     | chr14 | 62203755/GAACCTGATGCTTT//G | nonsynonymous | 1 | 0 |
| PLEKHD1   | chr14 | 69994592/C//T              | nonsynonymous | 1 | 0 |
| MAPKBP1   | chr15 | 42105522/G//A              | synonymous    | 1 | 0 |
| SLC24A1   | chr15 | 65917840/C//T              | synonymous    | 1 | 0 |
| CHST6     | chr16 | 75513265/C//T              | synonymous    | 1 | 0 |
| ADAD2     | chr16 | 84224938/G//A              | synonymous    | 1 | 0 |
| OR111     | chr19 | 15198246/G//A              | nonsynonymous | 1 | 0 |
| ATP13A1   | chr19 | 19758447/C//T              | synonymous    | 1 | 0 |
| TMC2      | chr20 | 2616588/C//A               | nonsynonymous | 1 | 0 |
| GFRA4     | chr20 | 3644023/C//T               | synonymous    | 1 | 0 |
| MYT1      | chr20 | 62830228/A//G              | nonsynonymous | 1 | 0 |
| TTC3      | chr21 | 38558036/A//G              | nonsynonymous | 1 | 0 |
| CACNA11   | chr22 | 40075108/G//A              | synonymous    | 1 | 0 |
| MAGEC3    | chrX  | 140969248/T//A             | nonsynonymous | 1 | 0 |
| RERE      | chr1  | 8418472/C//CCT             | nonsynonymous | 0 | 1 |
| LYPLA2    | chr1  | 24121029/T//C              | nonsynonymous | 0 | 1 |
| TNP1      | chr2  | 217724771/A//C             | synonymous    | 0 | 1 |
| HJURP     | chr2  | 234746195/A//G             | synonymous    | 0 | 1 |
| NME6      | chr3  | 48342942/G//C              | synonymous    | 0 | 1 |
| TMCO6     | chr5  | 140023477/T//C             | nonsynonymous | 0 | 1 |
| NAALADL1  | chr11 | 64825889/C//G              | synonymous    | 0 | 1 |
| ACP7      | chr19 | 39600831/C//G              | synonymous    | 0 | 1 |
| L1CAM     | chrX  | 153128826/T//C             | nonsynonymous | 0 | 1 |
| CAMTA1    | chr1  | 7725220/C//T               | synonymous    | 1 | 0 |
| ARHGEF10L | chr1  | 17964464/C//T              | nonsynonymous | 1 | 0 |
| PAX7      | chr1  | 18960951/C//T              | synonymous    | 1 | 0 |
| MEF2D     | chr1  | 156438646/T//C             | synonymous    | 1 | 0 |
| PEAR1     | chr1  | 156882292/C//T             | nonsynonymous | 1 | 0 |
| KCNJ9     | chr1  | 160057361/C//A             | nonsynonymous | 1 | 0 |
| PAPPA2    | chr1  | 176708793/C//A             | nonsynonymous | 1 | 0 |
| DUSP10    | chr1  | 221875658/C//A             | synonymous    | 1 | 0 |
| ACTA1     | chr1  | 229568112/G//T             | nonsynonymous | 1 | 0 |
| CTNNA2    | chr2  | 80646724/G//T              | nonsynonymous | 1 | 0 |
| SUCLG1    | chr2  | 84668213/T//C              | nonsynonymous | 1 | 0 |
| ACOXL     | chr2  | 111542370/C//T             | nonsynonymous | 1 | 0 |
| POTEE     | chr2  | 132021711/G//T             | nonsynonymous | 1 | 0 |
| LRP1B     | chr2  | 141208157/G//C             | nonsynonymous | 1 | 0 |
| LRP1B     | chr2  | 141208166/C//A             | nonsynonymous | 1 | 0 |
| LRP1B     | chr2  | 141819639/G//C             | nonsynonymous | 1 | 0 |
| KIF5C     | chr2  | 149838075/G//C             | synonymous    | 1 | 0 |
| HOXD13    | chr2  | 176958334/A//G             | nonsynonymous | 1 | 0 |
| SH3BP4    | chr2  | 235950254/G//C             | nonsynonymous | 1 | 0 |
| RNPEPL1   | chr2  | 241516028/G//T             | synonymous    | 1 | 0 |
| DHX30     | chr3  | 47890762/C//A              | nonsynonymous | 1 | 0 |
| CCDC71    | chr3  | 49200313/C//A              | synonymous    | 1 | 0 |
| STXBP5L   | chr3  | 120959337/A//T             | synonymous    | 1 | 0 |
| PHC3      | chr3  | 169840435/G//T             | nonsynonymous | 1 | 0 |
| NAT8L     | chr4  | 2062822/C//G               | synonymous    | 1 | 0 |
| SH3BP2    | chr4  | 2834139/G//T               | nonsynonymous | 1 | 0 |
| CEP135    | chr4  | 56823443/C//T              | nonsynonymous | 1 | 0 |
| SLC4A4    | chr4  | 72363407/A//T              | nonsynonymous | 1 | 0 |
| BBS12     | chr4  | 123664128/G//T             | nonsynonymous | 1 | 0 |
| ADCY2     | chr5  | 7757635/G//T               | nonsynonymous | 1 | 0 |
| DNAH5     | chr5  | 13928227/G//C              | nonsynonymous | 1 | 0 |
| MAP1B     | chr5  | 71494436/G//T              | nonsynonymous | 1 | 0 |

|          |       |                    |               |   |   |
|----------|-------|--------------------|---------------|---|---|
| ACOT12   | chr5  | 80639651/C//T      | nonsynonymous | 1 | 0 |
| LYSMD3   | chr5  | 89814801/TGAATG//T | nonsynonymous | 1 | 0 |
| DMXL1    | chr5  | 118485976/A//G     | nonsynonymous | 1 | 0 |
| TRPC7    | chr5  | 135602026/T//A     | synonymous    | 1 | 0 |
| PCDHGB1  | chr5  | 140732203/C//A     | nonsynonymous | 1 | 0 |
| PDGFRB   | chr5  | 149499694/G//T     | synonymous    | 1 | 0 |
| GABRB2   | chr5  | 160721114/C//T     | nonsynonymous | 1 | 0 |
| EHMT2    | chr6  | 31855349/C//A      | synonymous    | 1 | 0 |
| ATF6B    | chr6  | 32086562/C//G      | nonsynonymous | 1 | 0 |
| LEMD2    | chr6  | 33746132/G//A      | nonsynonymous | 1 | 0 |
| ELOVL4   | chr6  | 80629134/C//T      | synonymous    | 1 | 0 |
| GRM1     | chr6  | 146673505/G//T     | nonsynonymous | 1 | 0 |
| TFR2     | chr7  | 100218706/G//T     | nonsynonymous | 1 | 0 |
| PAX4     | chr7  | 127255572/C//A     | nonsynonymous | 1 | 0 |
| CSMD1    | chr8  | 2808787/A//T       | nonsynonymous | 1 | 0 |
| CSMD1    | chr8  | 2815228/G//T       | synonymous    | 1 | 0 |
| ADAM2    | chr8  | 39624777/G//A      | synonymous    | 1 | 0 |
| KIAA1429 | chr8  | 95531327/T//C      | nonsynonymous | 1 | 0 |
| TRAPPC9  | chr8  | 140743439/C//A     | synonymous    | 1 | 0 |
| ADGRB1   | chr8  | 143558473/A//T     | nonsynonymous | 1 | 0 |
| ZNF510   | chr9  | 99538394/C//A      | synonymous    | 1 | 0 |
| PFKFB3   | chr10 | 6263484/C//T       | synonymous    | 1 | 0 |
| BMS1     | chr10 | 43287968/T//G      | nonsynonymous | 1 | 0 |
| KLLN     | chr10 | 89622259/A//G      | synonymous    | 1 | 0 |
| OR8I2    | chr11 | 55860851/T//A      | nonsynonymous | 1 | 0 |
| NDUFV1   | chr11 | 67377937/G//A      | nonsynonymous | 1 | 0 |
| ARHGEF17 | chr11 | 73076867/G//T      | nonsynonymous | 1 | 0 |
| LIPT2    | chr11 | 74203189/G//A      | synonymous    | 1 | 0 |
| MTNR1B   | chr11 | 92703061/G//A      | nonsynonymous | 1 | 0 |
| MAML2    | chr11 | 95825383/C//T      | synonymous    | 1 | 0 |
| ARHGAP20 | chr11 | 110485361/T//C     | nonsynonymous | 1 | 0 |
| DRD2     | chr11 | 113295295/C//T     | nonsynonymous | 1 | 0 |
| MCAM     | chr11 | 119182818/G//A     | synonymous    | 1 | 0 |
| FGF23    | chr12 | 4479659/G//T       | synonymous    | 1 | 0 |
| CD163L1  | chr12 | 7585240/A//G       | nonsynonymous | 1 | 0 |
| CD163    | chr12 | 7655108/T//A       | nonsynonymous | 1 | 0 |
| RPL41    | chr12 | 56510999/C//T      | synonymous    | 1 | 0 |
| STAB2    | chr12 | 104111547/G//T     | nonsynonymous | 1 | 0 |
| WSCD2    | chr12 | 108589739/G//C     | nonsynonymous | 1 | 0 |
| NAA16    | chr13 | 41905445/A//G      | nonsynonymous | 1 | 0 |
| HTR2A    | chr13 | 47469783/G//T      | nonsynonymous | 1 | 0 |
| CPNE6    | chr14 | 24544456/C//T      | nonsynonymous | 1 | 0 |
| NKX2-1   | chr14 | 36986962/G//C      | nonsynonymous | 1 | 0 |
| LRFN5    | chr14 | 42356819/G//T      | nonsynonymous | 1 | 0 |
| ISM2     | chr14 | 77942224/C//A      | nonsynonymous | 1 | 0 |
| BEGAIN   | chr14 | 101006857/G//T     | nonsynonymous | 1 | 0 |
| AHNAK2   | chr14 | 105416158/G//A     | nonsynonymous | 1 | 0 |
| ACAN     | chr15 | 89402100/C//G      | nonsynonymous | 1 | 0 |
| SLC5A2   | chr16 | 31494478/A//G      | synonymous    | 1 | 0 |
| MMP2     | chr16 | 55523623/T//A      | nonsynonymous | 1 | 0 |
| CDH8     | chr16 | 61689523/A//C      | nonsynonymous | 1 | 0 |
| CDH8     | chr16 | 61851400/G//T      | synonymous    | 1 | 0 |
| ACAP1    | chr17 | 7246804/G//T       | nonsynonymous | 1 | 0 |
| NCOR1    | chr17 | 15995323/T//C      | nonsynonymous | 1 | 0 |
| SP2      | chr17 | 45994154/G//A      | synonymous    | 1 | 0 |
| SCN4A    | chr17 | 62045673/T//A      | nonsynonymous | 1 | 0 |
| DNAH17   | chr17 | 76565481/G//C      | nonsynonymous | 1 | 0 |
| LAMA1    | chr18 | 6977742/C//T       | nonsynonymous | 1 | 0 |
| SYT4     | chr18 | 40853745/G//T      | nonsynonymous | 1 | 0 |
| VSTM2B   | chr19 | 30054894/C//A      | synonymous    | 1 | 0 |
| GRAMD1A  | chr19 | 35505221/C//T      | synonymous    | 1 | 0 |
| PEG3     | chr19 | 57329187/G//A      | synonymous    | 1 | 0 |
| ZIK1     | chr19 | 58102221/G//T      | nonsynonymous | 1 | 0 |
| KIZ      | chr20 | 21143084/A//T      | synonymous    | 1 | 0 |
| FAM209B  | chr20 | 55108549/A//T      | nonsynonymous | 1 | 0 |
| ABHD16B  | chr20 | 62493371/C//G      | nonsynonymous | 1 | 0 |
| OPRL1    | chr20 | 62730150/T//C      | nonsynonymous | 1 | 0 |
| CLDN8    | chr21 | 31588150/C//A      | nonsynonymous | 1 | 0 |
| MIS18A   | chr21 | 33651353/C//A      | synonymous    | 1 | 0 |
| CECR2    | chr22 | 18027934/A//G      | nonsynonymous | 1 | 0 |

|          |       |                    |               |   |   |
|----------|-------|--------------------|---------------|---|---|
| TMEM211  | chr22 | 25331336/G//T      | synonymous    | 1 | 0 |
| PRR14L   | chr22 | 32112031/T//C      | synonymous    | 1 | 0 |
| SLC5A4   | chr22 | 32614516/G//A      | synonymous    | 1 | 0 |
| NPTXR    | chr22 | 39219240/C//A      | nonsynonymous | 1 | 0 |
| DMD      | chrX  | 32563298/C//A      | nonsynonymous | 1 | 0 |
| PFKFB1   | chrX  | 54975592/G//T      | synonymous    | 1 | 0 |
| RBMXL3   | chrX  | 114424397/C//T     | synonymous    | 1 | 0 |
| SLC25A5  | chrX  | 118603690/C//G     | nonsynonymous | 1 | 0 |
| ENOX2    | chrX  | 129765514/C//A     | nonsynonymous | 1 | 0 |
| ENOX2    | chrX  | 129837150/G//T     | nonsynonymous | 1 | 0 |
| PNMA5    | chrX  | 152159095/C//T     | nonsynonymous | 1 | 0 |
| KLHL21   | chr1  | 6653411/G//A       | synonymous    | 0 | 1 |
| DISP3    | chr1  | 11561859/C//T      | synonymous    | 0 | 1 |
| CTRC     | chr1  | 15769913/G//A      | nonsynonymous | 0 | 1 |
| HSPG2    | chr1  | 22156076/G//A      | nonsynonymous | 0 | 1 |
| OPRD1    | chr1  | 29189436/C//T      | nonsynonymous | 0 | 1 |
| AGO1     | chr1  | 36379482/C//A      | nonsynonymous | 0 | 1 |
| RNF115   | chr1  | 145663244/C//T     | nonsynonymous | 0 | 1 |
| NIT1     | chr1  | 161089667/G//T     | nonsynonymous | 0 | 1 |
| BRINP2   | chr1  | 177247890/C//T     | nonsynonymous | 0 | 1 |
| CEP350   | chr1  | 180044227/C//T     | nonsynonymous | 0 | 1 |
| FAM129A  | chr1  | 184764744/C//T     | synonymous    | 0 | 1 |
| C1orf106 | chr1  | 200881115/C//T     | synonymous    | 0 | 1 |
| SYT2     | chr1  | 202572237/C//T     | nonsynonymous | 0 | 1 |
| PIGR     | chr1  | 207110911/G//A     | nonsynonymous | 0 | 1 |
| ABHD1    | chr2  | 27352719/C//T      | nonsynonymous | 0 | 1 |
| TANC1    | chr2  | 160032874/C//T     | nonsynonymous | 0 | 1 |
| TNS1     | chr2  | 218683029/C//T     | synonymous    | 0 | 1 |
| CTDSP1   | chr2  | 219267992/G//A     | nonsynonymous | 0 | 1 |
| SPEG     | chr2  | 220333930/C//T     | synonymous    | 0 | 1 |
| HJURP    | chr2  | 234749829/C//T     | nonsynonymous | 0 | 1 |
| ATP2B2   | chr3  | 10491116/G//A      | nonsynonymous | 0 | 1 |
| FEZF2    | chr3  | 62358581/C//T      | synonymous    | 0 | 1 |
| IGSF11   | chr3  | 118623521/T//C     | synonymous    | 0 | 1 |
| HCLS1    | chr3  | 121354594/G//A     | nonsynonymous | 0 | 1 |
| ADCY5    | chr3  | 123015053/C//T     | nonsynonymous | 0 | 1 |
| MYL5     | chr4  | 674346/C//T        | nonsynonymous | 0 | 1 |
| ZFYVE28  | chr4  | 2273051/C//T       | nonsynonymous | 0 | 1 |
| KLHL5    | chr4  | 39064182/G//T      | nonsynonymous | 0 | 1 |
| NPFFR2   | chr4  | 72897598/C//A      | synonymous    | 0 | 1 |
| ANKRD17  | chr4  | 74013069/C//T      | nonsynonymous | 0 | 1 |
| SHROOM3  | chr4  | 77662799/C//T      | nonsynonymous | 0 | 1 |
| BASP1    | chr5  | 17275508/C//T      | synonymous    | 0 | 1 |
| C6       | chr5  | 41199935/C//T      | nonsynonymous | 0 | 1 |
| ZNF131   | chr5  | 43174797/G//A      | synonymous    | 0 | 1 |
| NNT      | chr5  | 43655960/G//A      | nonsynonymous | 0 | 1 |
| LVRN     | chr5  | 115298868/C//T     | nonsynonymous | 0 | 1 |
| SLC35A4  | chr5  | 139946808/C//T     | synonymous    | 0 | 1 |
| PCDHA5   | chr5  | 140203245/G//A     | nonsynonymous | 0 | 1 |
| RNF145   | chr5  | 158630518/C//T     | synonymous    | 0 | 1 |
| INTS1    | chr7  | 1524958/C//T       | nonsynonymous | 0 | 1 |
| CARD11   | chr7  | 2968323/G//A       | nonsynonymous | 0 | 1 |
| PKD1L1   | chr7  | 47917128/C//G      | nonsynonymous | 0 | 1 |
| TRRAP    | chr7  | 98565244/G//A      | nonsynonymous | 0 | 1 |
| CUX1     | chr7  | 101870830/C//T     | nonsynonymous | 0 | 1 |
| OR2A25   | chr7  | 143771320/G//A     | nonsynonymous | 0 | 1 |
| AOC1     | chr7  | 150555109/C//T     | synonymous    | 0 | 1 |
| KMT2C    | chr7  | 151882712/C//T     | nonsynonymous | 0 | 1 |
| ESYT2    | chr7  | 158534354/G//A     | synonymous    | 0 | 1 |
| SOX7     | chr8  | 10583195/A//G      | synonymous    | 0 | 1 |
| SLC18A1  | chr8  | 20022428/G//A      | synonymous    | 0 | 1 |
| AZIN1    | chr8  | 103840911/G//A     | synonymous    | 0 | 1 |
| ABRA     | chr8  | 107781767/G//A     | nonsynonymous | 0 | 1 |
| COL22A1  | chr8  | 139642994/A//T     | synonymous    | 0 | 1 |
| TMEM249  | chr8  | 145577491/C//T     | nonsynonymous | 0 | 1 |
| FAM166B  | chr9  | 35563207/C//T      | nonsynonymous | 0 | 1 |
| FBXO10   | chr9  | 37521678/G//A      | synonymous    | 0 | 1 |
| FANCC    | chr9  | 97934405/C//T      | nonsynonymous | 0 | 1 |
| OR13C5   | chr9  | 107361178/TGTTA//T | nonsynonymous | 0 | 1 |
| UGCG     | chr9  | 114695145/C//T     | synonymous    | 0 | 1 |

|          |       |                |               |   |   |
|----------|-------|----------------|---------------|---|---|
| NRP1     | chr10 | 33619675/T//C  | nonsynonymous | 0 | 1 |
| PARD3    | chr10 | 34806021/C//A  | nonsynonymous | 0 | 1 |
| C10orf71 | chr10 | 50535004/A//G  | synonymous    | 0 | 1 |
| WASHC2A  | chr10 | 51827904/T//C  | nonsynonymous | 0 | 1 |
| FAM149B1 | chr10 | 74994678/G//A  | nonsynonymous | 0 | 1 |
| FAM35A   | chr10 | 88930227/T//C  | synonymous    | 0 | 1 |
| PRAP1    | chr10 | 135165868/G//A | nonsynonymous | 0 | 1 |
| WEE1     | chr11 | 9595597/G//A   | synonymous    | 0 | 1 |
| ADM      | chr11 | 10328079/G//A  | nonsynonymous | 0 | 1 |
| EFEMP2   | chr11 | 65635367/G//A  | nonsynonymous | 0 | 1 |
| ALDH3B2  | chr11 | 67433148/C//T  | synonymous    | 0 | 1 |
| PHOX2A   | chr11 | 71952251/C//T  | synonymous    | 0 | 1 |
| RELT     | chr11 | 73100204/G//A  | nonsynonymous | 0 | 1 |
| MTNR1B   | chr11 | 92702947/G//A  | nonsynonymous | 0 | 1 |
| CEP126   | chr11 | 101833161/G//T | nonsynonymous | 0 | 1 |
| SYT10    | chr12 | 33538176/C//T  | synonymous    | 0 | 1 |
| KMT2D    | chr12 | 49426107/G//T  | synonymous    | 0 | 1 |
| FGD6     | chr12 | 95488477/G//T  | synonymous    | 0 | 1 |
| SELPLG   | chr12 | 109017064/C//T | synonymous    | 0 | 1 |
| SRRM4    | chr12 | 119594313/C//T | nonsynonymous | 0 | 1 |
| CIT      | chr12 | 120271915/C//T | nonsynonymous | 0 | 1 |
| ARL11    | chr13 | 50205022/C//A  | nonsynonymous | 0 | 1 |
| PCDH20   | chr13 | 61987661/T//C  | nonsynonymous | 0 | 1 |
| IPO5     | chr13 | 98662271/G//T  | synonymous    | 0 | 1 |
| TEP1     | chr14 | 20871929/G//A  | nonsynonymous | 0 | 1 |
| OR4N4    | chr15 | 22382965/C//T  | nonsynonymous | 0 | 1 |
| VPS18    | chr15 | 41191152/G//A  | nonsynonymous | 0 | 1 |
| RAB27A   | chr15 | 55497817/A//G  | nonsynonymous | 0 | 1 |
| KIF7     | chr15 | 90185494/G//A  | synonymous    | 0 | 1 |
| ASB7     | chr15 | 101169752/G//A | nonsynonymous | 0 | 1 |
| SMG1     | chr16 | 18851023/C//T  | synonymous    | 0 | 1 |
| KNOP1    | chr16 | 19721901/C//T  | nonsynonymous | 0 | 1 |
| NETO2    | chr16 | 47163190/C//T  | synonymous    | 0 | 1 |
| CHD9     | chr16 | 53189928/A//G  | synonymous    | 0 | 1 |
| PDPR     | chr16 | 70177545/C//T  | nonsynonymous | 0 | 1 |
| HYDIN    | chr16 | 70972554/G//A  | nonsynonymous | 0 | 1 |
| EFNB3    | chr17 | 7612843/C//T   | synonymous    | 0 | 1 |
| CNTROB   | chr17 | 7843066/A//G   | nonsynonymous | 0 | 1 |
| TOM1L2   | chr17 | 17772690/T//C  | nonsynonymous | 0 | 1 |
| TAOK1    | chr17 | 27869642/C//T  | nonsynonymous | 0 | 1 |
| TMEM132E | chr17 | 32964987/C//T  | synonymous    | 0 | 1 |
| ARHGAP23 | chr17 | 36614383/G//A  | nonsynonymous | 0 | 1 |
| RUNDC1   | chr17 | 41143096/A//G  | nonsynonymous | 0 | 1 |
| TBX2     | chr17 | 59481775/C//T  | synonymous    | 0 | 1 |
| RHBDF2   | chr17 | 74468110/C//T  | nonsynonymous | 0 | 1 |
| ME2      | chr18 | 48473498/C//T  | nonsynonymous | 0 | 1 |
| C2CD4C   | chr19 | 407917/C//T    | nonsynonymous | 0 | 1 |
| TLE2     | chr19 | 3025079/G//A   | nonsynonymous | 0 | 1 |
| ZNF699   | chr19 | 9407257/C//T   | nonsynonymous | 0 | 1 |
| BRD4     | chr19 | 15376189/G//A  | synonymous    | 0 | 1 |
| SIN3B    | chr19 | 16980660/G//A  | synonymous    | 0 | 1 |
| UPF1     | chr19 | 18966840/G//A  | nonsynonymous | 0 | 1 |
| NR2C2AP  | chr19 | 19312402/C//A  | synonymous    | 0 | 1 |
| FXYP7    | chr19 | 35642224/C//T  | synonymous    | 0 | 1 |
| CIC      | chr19 | 42791751/C//T  | nonsynonymous | 0 | 1 |
| PTGIR    | chr19 | 47127207/G//A  | synonymous    | 0 | 1 |
| KCNJ14   | chr19 | 48965354/G//A  | nonsynonymous | 0 | 1 |
| TARM1    | chr19 | 54573238/G//A  | synonymous    | 0 | 1 |
| EPB41L1  | chr20 | 34783271/G//A  | synonymous    | 0 | 1 |
| PLCG1    | chr20 | 39794859/C//T  | nonsynonymous | 0 | 1 |
| EYA2     | chr20 | 45717964/C//T  | nonsynonymous | 0 | 1 |
| UCKL1    | chr20 | 62572001/G//A  | synonymous    | 0 | 1 |
| RGS19    | chr20 | 62705590/G//A  | synonymous    | 0 | 1 |
| ADAMTS1  | chr21 | 28213357/G//A  | synonymous    | 0 | 1 |
| EMID1    | chr22 | 29630174/G//A  | nonsynonymous | 0 | 1 |
| AP1B1    | chr22 | 29745272/G//A  | nonsynonymous | 0 | 1 |
| RS1      | chrX  | 18674837/G//A  | synonymous    | 0 | 1 |
| SYTL5    | chrX  | 37967952/G//T  | nonsynonymous | 0 | 1 |
| TEX13B   | chrX  | 107224511/A//G | synonymous    | 0 | 1 |
| TRPC5    | chrX  | 111090334/C//T | synonymous    | 0 | 1 |



|           |       |                 |               |   |   |
|-----------|-------|-----------------|---------------|---|---|
| ZNF280C   | chrX  | 129354448/C//T  | nonsynonymous | 0 | 1 |
| MAMLD1    | chrX  | 149680664/C//A  | synonymous    | 0 | 1 |
|           | chrX  | 152110326/G//A  | synonymous    | 0 | 1 |
| RAB42     | chr1  | 28920641/A//G   | synonymous    | 0 | 1 |
| COL16A1   | chr1  | 32118412/C//T   | nonsynonymous | 0 | 1 |
| MIER1     | chr1  | 67452181/G//A   | synonymous    | 0 | 1 |
| CLCA4     | chr1  | 87038389/C//T   | nonsynonymous | 0 | 1 |
| RNF115    | chr1  | 145663260/C//T  | synonymous    | 0 | 1 |
| GJA8      | chr1  | 147380435/C//T  | nonsynonymous | 0 | 1 |
| UBAP2L    | chr1  | 154242830/A//G  | synonymous    | 0 | 1 |
| PEAR1     | chr1  | 156878118/G//T  | synonymous    | 0 | 1 |
| SRGAP2    | chr1  | 206626635/C//A  | nonsynonymous | 0 | 1 |
| LEFTY1    | chr1  | 226074626/G//A  | nonsynonymous | 0 | 1 |
| C1orf101  | chr1  | 244715729/G//A  | synonymous    | 0 | 1 |
| OR2T1     | chr1  | 248570297/G//T  | nonsynonymous | 0 | 1 |
| TPO       | chr2  | 1457473/C//T    | nonsynonymous | 0 | 1 |
| APOB      | chr2  | 21242657/G//A   | synonymous    | 0 | 1 |
|           | chr2  | 49003525/G//T   | synonymous    | 0 | 1 |
| AFTPH     | chr2  | 64779295/G//A   | synonymous    | 0 | 1 |
| ASTL      | chr2  | 96801128/C//T   | nonsynonymous | 0 | 1 |
| LIMS2     | chr2  | 128414974/C//T  | synonymous    | 0 | 1 |
| GALNT13   | chr2  | 154801015/G//A  | nonsynonymous | 0 | 1 |
| TTN       | chr2  | 179436634/C//T  | nonsynonymous | 0 | 1 |
| SPEG      | chr2  | 220337690/G//A  | nonsynonymous | 0 | 1 |
| ITPR1     | chr3  | 4704852/C//T    | nonsynonymous | 0 | 1 |
| EAF1      | chr3  | 15477915/C//G   | nonsynonymous | 0 | 1 |
| CCDC14    | chr3  | 123680114/C//T  | synonymous    | 0 | 1 |
| TF        | chr3  | 133473429/C//T  | nonsynonymous | 0 | 1 |
| ZIC4      | chr3  | 147108806/G//A  | nonsynonymous | 0 | 1 |
| HGFAC     | chr4  | 3446406/G//A    | nonsynonymous | 0 | 1 |
| RXFP3     | chr5  | 33937316/C//T   | synonymous    | 0 | 1 |
|           | chr5  | 33951631/G//A   | synonymous    | 0 | 1 |
| NR3C1     | chr5  | 142779874/G//A  | synonymous    | 0 | 1 |
| CAGE1     | chr6  | 7370254/A//C    | synonymous    | 0 | 1 |
| RNF39     | chr6  | 30038955/C//T   | nonsynonymous | 0 | 1 |
| MUC22     | chr6  | 30994341/C//T   | nonsynonymous | 0 | 1 |
| UHRF1BP1  | chr6  | 34835294/C//T   | nonsynonymous | 0 | 1 |
| SCUBE3    | chr6  | 35201032/C//T   | synonymous    | 0 | 1 |
| DNAH8     | chr6  | 38905882/G//A   | nonsynonymous | 0 | 1 |
| PRPH2     | chr6  | 42690035/C//T   | nonsynonymous | 0 | 1 |
| DST       | chr6  | 56334718/C//T   | nonsynonymous | 0 | 1 |
| GLI3      | chr7  | 42088202/G//T   | synonymous    | 0 | 1 |
| CACNA2D1  | chr7  | 81614032/A//C   | synonymous    | 0 | 1 |
| SEMA3D    | chr7  | 84628897/G//A   | synonymous    | 0 | 1 |
| WDR91     | chr7  | 134871810/G//C  | nonsynonymous | 0 | 1 |
| SNTG1     | chr8  | 51351160/G//A   | nonsynonymous | 0 | 1 |
| PXDNL     | chr8  | 52232532/G//T   | synonymous    | 0 | 1 |
| TRPA1     | chr8  | 72970024/C//T   | nonsynonymous | 0 | 1 |
| NECAB1    | chr8  | 91804101/C//T   | synonymous    | 0 | 1 |
| ATAD2     | chr8  | 124333356/C//T  | synonymous    | 0 | 1 |
| ADCY8     | chr8  | 132052065/C//T  | nonsynonymous | 0 | 1 |
| KCNQ3     | chr8  | 133141799/G//T  | synonymous    | 0 | 1 |
| PSCA      | chr8  | 143763566/G//A  | synonymous    | 0 | 1 |
| SPATA31C1 | chr9  | 90538057/C//T   | nonsynonymous | 0 | 1 |
| OR13C3    | chr9  | 107298417/A//G  | synonymous    | 0 | 1 |
| NR5A1     | chr9  | 127262992/C//T  | nonsynonymous | 0 | 1 |
| C9orf163  | chr9  | 139379279/C//CT | nonsynonymous | 0 | 1 |
| NOTCH1    | chr9  | 139403459/C//T  | nonsynonymous | 0 | 1 |
| GRIN1     | chr9  | 140034068/G//A  | nonsynonymous | 0 | 1 |
| PNPLA7    | chr9  | 140374832/G//A  | nonsynonymous | 0 | 1 |
| NPFFR1    | chr10 | 72020460/C//T   | nonsynonymous | 0 | 1 |
| DLG5      | chr10 | 79570925/G//A   | nonsynonymous | 0 | 1 |
| PTPN5     | chr11 | 18765564/A//T   | nonsynonymous | 0 | 1 |
| OR4C13    | chr11 | 49974856/T//C   | synonymous    | 0 | 1 |
| OR5D16    | chr11 | 55606581/G//A   | synonymous    | 0 | 1 |
| USP28     | chr11 | 113675474/C//G  | nonsynonymous | 0 | 1 |
| AICDA     | chr12 | 8757845/G//A    | synonymous    | 0 | 1 |
| ST8SIA1   | chr12 | 22487124/C//T   | nonsynonymous | 0 | 1 |
| FIGNL2    | chr12 | 52215965/G//A   | nonsynonymous | 0 | 1 |
| SLC46A3   | chr13 | 29286819/A//C   | nonsynonymous | 0 | 1 |

|              |       |                       |               |   |   |
|--------------|-------|-----------------------|---------------|---|---|
| SPERT        | chr13 | 46287980/A/G          | nonsynonymous | 0 | 1 |
| KLHL1        | chr13 | 70549838/G/C          | synonymous    | 0 | 1 |
|              | chr13 | 113851461/C//A        | synonymous    | 0 | 1 |
| FLRT2        | chr14 | 86089389/G//A         | nonsynonymous | 0 | 1 |
| GSC          | chr14 | 95235458/A/C          | nonsynonymous | 0 | 1 |
| INO80        | chr15 | 41372071/C//T         | nonsynonymous | 0 | 1 |
| WHAMM        | chr15 | 83482020/G//T         | nonsynonymous | 0 | 1 |
| C15orf40     | chr15 | 83679094/G//T         | nonsynonymous | 0 | 1 |
| RPL3L        | chr16 | 2003968/C//T          | nonsynonymous | 0 | 1 |
| GPR139       | chr16 | 20043133/G//A         | nonsynonymous | 0 | 1 |
| PRMT7        | chr16 | 68358715/G//A         | nonsynonymous | 0 | 1 |
| DHRS7C       | chr17 | 9680578/C//T          | nonsynonymous | 0 | 1 |
| GHDC         | chr17 | 40342245/C//T         | synonymous    | 0 | 1 |
| FAM171A2     | chr17 | 42433918/C//A         | nonsynonymous | 0 | 1 |
| SLC25A41     | chr19 | 6427341/A//G          | synonymous    | 0 | 1 |
| ACTL9        | chr19 | 8807842/C//T          | nonsynonymous | 0 | 1 |
| MUC16        | chr19 | 9088670/C//A          | nonsynonymous | 0 | 1 |
| IFNL3        | chr19 | 39734324/C//T         | nonsynonymous | 0 | 1 |
| TNNT1        | chr19 | 55652273/C//T         | nonsynonymous | 0 | 1 |
| CFAP61       | chr20 | 20278851/G//A         | synonymous    | 0 | 1 |
| MYBL2        | chr20 | 42311463/G//T         | nonsynonymous | 0 | 1 |
| FBLN1        | chr22 | 45938127/G//T         | nonsynonymous | 0 | 1 |
| PDZD4        | chrX  | 153068716/GCA//G      | synonymous    | 0 | 1 |
| NBPF1        | chr1  | 16913612/G//A         | synonymous    | 0 | 1 |
| RYR2         | chr1  | 237774218/C//T        | nonsynonymous | 0 | 1 |
| TSGA10       | chr2  | 99697815/T//C         | synonymous    | 0 | 1 |
| THG1L        | chr5  | 157160035/G//A        | nonsynonymous | 0 | 1 |
| DMRT3        | chr9  | 990875/C//T           | nonsynonymous | 0 | 1 |
|              | chr10 | 125780757/G//C        | synonymous    | 0 | 1 |
| MHRT         | chr14 | 23886562/A//G         | synonymous    | 0 | 1 |
| MIA2         | chr14 | 39717107/A//G         | synonymous    | 0 | 1 |
| MDGA2        | chr14 | 47351270/G//T         | nonsynonymous | 0 | 1 |
| MYO18B       | chr22 | 26291213/C//T         | nonsynonymous | 0 | 1 |
| HPCA         | chr1  | 33354520/G//A         | synonymous    | 0 | 1 |
|              | chr1  | 158986489/A//T        | synonymous    | 0 | 1 |
| PPIG         | chr2  | 170487292/G//A        | nonsynonymous | 0 | 1 |
| BARD1        | chr2  | 215593725/T//C        | nonsynonymous | 0 | 1 |
| TIAM2        | chr6  | 155485552/C//T        | nonsynonymous | 0 | 1 |
| ZNHIT2       | chr11 | 64884573/G//T         | nonsynonymous | 0 | 1 |
| RIN3         | chr14 | 93118767/T//TCA       | nonsynonymous | 0 | 1 |
| PSMD3        | chr17 | 38153963/G//C         | synonymous    | 0 | 1 |
| PSMD12       | chr17 | 65336909/C//A         | synonymous    | 0 | 1 |
| KIAA1683     | chr19 | 18377273/C//CG        | nonsynonymous | 0 | 1 |
| LOC101927051 | chr22 | 38038813/C//T         | synonymous    | 0 | 1 |
| TXLNG        | chrX  | 16850848/CAGAG//C     | nonsynonymous | 0 | 1 |
| APEX2        | chrX  | 55029513/C//A         | synonymous    | 0 | 1 |
| CROCC        | chr1  | 17249172/C//T         | synonymous    | 1 | 0 |
| CEP85        | chr1  | 26581980/C//T         | nonsynonymous | 1 | 0 |
| SLC35D1      | chr1  | 67507988/G//C         | synonymous    | 1 | 0 |
| LMNA         | chr1  | 156106194/C//A        | synonymous    | 1 | 0 |
| METTL18      | chr1  | 169762049/C//A        | nonsynonymous | 1 | 0 |
| CCDC88A      | chr2  | 55544941/G//A         | nonsynonymous | 1 | 0 |
|              | chr2  | 97637887/C//T         | synonymous    | 1 | 0 |
| ITM2C        | chr2  | 231729678/G//A        | synonymous    | 1 | 0 |
| DGKD         | chr2  | 234346121/C//T        | synonymous    | 1 | 0 |
| OR5K1        | chr3  | 98188595/A//G         | nonsynonymous | 1 | 0 |
| RHO          | chr3  | 129251463/C//A        | nonsynonymous | 1 | 0 |
| MECOM        | chr3  | 168834474/GCTTATGA//G | nonsynonymous | 1 | 0 |
| ZNF732       | chr4  | 264820/G//A           | synonymous    | 1 | 0 |
| PLEKHG4B     | chr5  | 171207/C//T           | nonsynonymous | 1 | 0 |
|              | chr5  | 73218954/C//T         | synonymous    | 1 | 0 |
| ADGRV1       | chr5  | 90020924/A//G         | nonsynonymous | 1 | 0 |
| PCDHGA1      | chr5  | 140712533/C//T        | nonsynonymous | 1 | 0 |
| PCDHGB3      | chr5  | 140751844/C//T        | nonsynonymous | 1 | 0 |
| HIST1H2AL    | chr6  | 27833349/GACA//G      | nonsynonymous | 1 | 0 |
| CARD11       | chr7  | 2946340/G//A          | nonsynonymous | 1 | 0 |
| SCIN         | chr7  | 12675752/G//GTCT      | nonsynonymous | 1 | 0 |
| SBDS         | chr7  | 66456200/C//T         | nonsynonymous | 1 | 0 |
| ZNF804B      | chr7  | 88965493/G//A         | nonsynonymous | 1 | 0 |
| PPP1R9A      | chr7  | 94540327/A//G         | nonsynonymous | 1 | 0 |

|            |       |                           |               |   |   |
|------------|-------|---------------------------|---------------|---|---|
| GNA14      | chr9  | 80046298/C//T             | nonsynonymous | 1 | 0 |
| GTF3C4     | chr9  | 135554781/C//T            | nonsynonymous | 1 | 0 |
| MYO3A      | chr10 | 26315314/C//A             | nonsynonymous | 1 | 0 |
| PTEN       | chr10 | 89692904/C//G             | nonsynonymous | 1 | 0 |
| PLPP4      | chr10 | 122334667/C//T            | nonsynonymous | 1 | 0 |
| LUZP2      | chr11 | 25100270/C//A             | synonymous    | 1 | 0 |
| GUCY1A2    | chr11 | 106558445/G//A            | nonsynonymous | 1 | 0 |
| SRPRA      | chr11 | 126135214/G//A            | synonymous    | 1 | 0 |
| LRP1       | chr12 | 57593182/C//T             | synonymous    | 1 | 0 |
| MYF6       | chr12 | 81101930/G//T             | synonymous    | 1 | 0 |
| C15orf41   | chr15 | 37001439/G//C             | nonsynonymous | 1 | 0 |
| BUB1B      | chr15 | 40457324/C//T             | nonsynonymous | 1 | 0 |
| PYGO1      | chr15 | 55839304/C//T             | synonymous    | 1 | 0 |
| LIPC       | chr15 | 58838165/G//A             | nonsynonymous | 1 | 0 |
| DNAH3      | chr16 | 21136562/C//T             | synonymous    | 1 | 0 |
| GTF3C1     | chr16 | 27549121/G//A             | nonsynonymous | 1 | 0 |
| POLR2C     | chr16 | 57503204/C//T             | nonsynonymous | 1 | 0 |
| TCF25      | chr16 | 89965043/C//A             | nonsynonymous | 1 | 0 |
| STAT5B     | chr17 | 40353861/G//A             | synonymous    | 1 | 0 |
| SGSH       | chr17 | 78188487/C//T             | nonsynonymous | 1 | 0 |
| CELF4      | chr18 | 34853075/G//T             | nonsynonymous | 1 | 0 |
| ELOA2      | chr18 | 44561092/C//T             | nonsynonymous | 1 | 0 |
| POLRMT     | chr19 | 619646/C//T               | synonymous    | 1 | 0 |
| SLC25A41   | chr19 | 6426523/G//A              | synonymous    | 1 | 0 |
| FBN3       | chr19 | 8206610/C//T              | nonsynonymous | 1 | 0 |
| RGL3       | chr19 | 11517430/C//T             | nonsynonymous | 1 | 0 |
| PIK3R2     | chr19 | 18266589/A//C             | synonymous    | 1 | 0 |
| FOXA2      | chr20 | 22563679/GCC//G           | nonsynonymous | 1 | 0 |
| CD93       | chr20 | 23065533/C//A             | nonsynonymous | 1 | 0 |
| MYH7B      | chr20 | 33578925/G//A             | nonsynonymous | 1 | 0 |
| CEP250     | chr20 | 34060581/G//T             | nonsynonymous | 1 | 0 |
| NCAM2      | chr21 | 22664456/C//A             | nonsynonymous | 1 | 0 |
| TIAM1      | chr21 | 32526628/C//T             | synonymous    | 1 | 0 |
| PRDM15     | chr21 | 43279720/A//G             | nonsynonymous | 1 | 0 |
| RNF185     | chr22 | 31591554/C//A             | nonsynonymous | 1 | 0 |
| SUN2       | chr22 | 39132218/G//A             | synonymous    | 1 | 0 |
| MIEF1      | chr22 | 39910225/C//G             | nonsynonymous | 1 | 0 |
| EP300      | chr22 | 41573057/TCTGCAAGCAGCTCAT | nonsynonymous | 1 | 0 |
| MXRA5      | chrX  | 3235405/G//A              | nonsynonymous | 1 | 0 |
| FTHL17     | chrX  | 31089535/C//T             | nonsynonymous | 1 | 0 |
| ACSL4      | chrX  | 108926505/T//C            | nonsynonymous | 1 | 0 |
| PLXNB3     | chrX  | 153036313/G//A            | nonsynonymous | 1 | 0 |
| F8         | chrX  | 154157903/G//T            | nonsynonymous | 1 | 0 |
| DNAH1      | chr3  | 52383391/C//T             | synonymous    | 0 | 1 |
| CHST13     | chr3  | 126260696/G//C            | nonsynonymous | 0 | 1 |
| NDST1      | chr5  | 149900838/C//T            | nonsynonymous | 0 | 1 |
| CARD11     | chr7  | 2951847/C//T              | nonsynonymous | 0 | 1 |
| WASL       | chr7  | 123332486/T//C            | nonsynonymous | 0 | 1 |
| CTSB       | chr8  | 11703251/G//T             | nonsynonymous | 0 | 1 |
| CSGALNACT1 | chr8  | 19362728/G//T             | synonymous    | 0 | 1 |
| TMEM64     | chr8  | 91657642/G//A             | synonymous    | 0 | 1 |
| HSPA14     | chr10 | 14893286/C//T             | nonsynonymous | 0 | 1 |
| OR8K3      | chr11 | 56085881/G//T             | nonsynonymous | 0 | 1 |
| JAML       | chr11 | 118076602/C//CGCGAG       | nonsynonymous | 0 | 1 |
| BSX        | chr11 | 122848365/C//T            | nonsynonymous | 0 | 1 |
| PAPLN      | chr14 | 73719482/C//T             | nonsynonymous | 0 | 1 |
| HS3ST3A1   | chr17 | 13503956/C//A             | nonsynonymous | 0 | 1 |
| POLR2E     | chr19 | 1091849/T//C              | nonsynonymous | 0 | 1 |
| ZNF708     | chr19 | 21476223/C//T             | synonymous    | 0 | 1 |
| PTPRT      | chr20 | 40979344/C//G             | nonsynonymous | 0 | 1 |
| SPRED2     | chr2  | 65540895/C//T             | nonsynonymous | 0 | 1 |
| HSPD1      | chr2  | 198352607/T//C            | nonsynonymous | 0 | 1 |
| HSPD1      | chr2  | 198352609/C//T            | synonymous    | 0 | 1 |
| CFAP44     | chr3  | 113118844/G//C            | nonsynonymous | 0 | 1 |
| COL6A6     | chr3  | 130313144/G//A            | nonsynonymous | 0 | 1 |
| EYS        | chr6  | 65707569/T//A             | nonsynonymous | 0 | 1 |
| DOPEY1     | chr6  | 83847340/G//A             | synonymous    | 0 | 1 |
| QRSL1      | chr6  | 107097034/C//G            | nonsynonymous | 0 | 1 |
| SLC18B1    | chr6  | 133091444/C//A            | nonsynonymous | 0 | 1 |
| GLI3       | chr7  | 42005935/G//A             | synonymous    | 0 | 1 |

|          |       |                   |               |   |   |
|----------|-------|-------------------|---------------|---|---|
| ACHE     | chr7  | 100491656/G//A    | synonymous    | 0 | 1 |
| HR       | chr8  | 21976718/T//C     | nonsynonymous | 0 | 1 |
| SMARCA2  | chr9  | 2039818/A//G      | synonymous    | 0 | 1 |
| UCN3     | chr10 | 5415985/C//A      | nonsynonymous | 0 | 1 |
| TET1     | chr10 | 70333031/A//G     | synonymous    | 0 | 1 |
| PYROXD2  | chr10 | 100174826/C//T    | nonsynonymous | 0 | 1 |
| SLC18A2  | chr10 | 119003828/G//C    | synonymous    | 0 | 1 |
| IGSF22   | chr11 | 18737033/T//C     | nonsynonymous | 0 | 1 |
| AMBRA1   | chr11 | 46564512/G//C     | nonsynonymous | 0 | 1 |
| RTN4RL2  | chr11 | 57243799/C//T     | synonymous    | 0 | 1 |
| B3GAT1   | chr11 | 134254012/G//A    | synonymous    | 0 | 1 |
| TNFRSF1A | chr12 | 6442966/C//T      | nonsynonymous | 0 | 1 |
| ANO6     | chr12 | 45815015/G//A     | synonymous    | 0 | 1 |
| ELF1     | chr13 | 41515390/A//G     | nonsynonymous | 0 | 1 |
| LACC1    | chr13 | 44456359/A//G     | nonsynonymous | 0 | 1 |
| COL4A2   | chr13 | 111144444/G//A    | nonsynonymous | 0 | 1 |
|          | chr15 | 45409642/G//A     | synonymous    | 0 | 1 |
| BBS4     | chr15 | 73004634/C//T     | nonsynonymous | 0 | 1 |
| IQGAP1   | chr15 | 91026607/G//C     | nonsynonymous | 0 | 1 |
| CBX8     | chr17 | 77768429/AGCAT//A | synonymous    | 0 | 1 |
| CBX8     | chr17 | 77768432/AT//A    | synonymous    | 0 | 1 |
| ZNF708   | chr19 | 21476979/C//T     | synonymous    | 0 | 1 |
| ZNF208   | chr19 | 22155615/C//G     | nonsynonymous | 0 | 1 |
| ZNF607   | chr19 | 38200664/G//C     | synonymous    | 0 | 1 |
| SIPA1L3  | chr19 | 38633345/A//G     | synonymous    | 0 | 1 |
| PSG1     | chr19 | 43376047/T//G     | nonsynonymous | 0 | 1 |
| NLRP9    | chr19 | 56244180/C//A     | synonymous    | 0 | 1 |
| CPXM1    | chr20 | 2779123/C//T      | nonsynonymous | 0 | 1 |
| SPTLC3   | chr20 | 13145399/A//G     | nonsynonymous | 0 | 1 |
| SYCP2    | chr20 | 58440643/A//T     | synonymous    | 0 | 1 |
| ZNRF3    | chr22 | 29446905/G//T     | nonsynonymous | 0 | 1 |
| GOLGB1   | chr3  | 121410049/T//A    | nonsynonymous | 1 | 0 |
| SSPO     | chr7  | 149486718/T//TG   | nonsynonymous | 1 | 0 |
| YME1L1   | chr10 | 27423801/T//A     | nonsynonymous | 1 | 0 |
| SHISA9   | chr16 | 13329129/C//T     | nonsynonymous | 1 | 0 |
| HRC      | chr19 | 49655307/C//T     | synonymous    | 1 | 0 |
| BIRC7    | chr20 | 61869312/G//A     | nonsynonymous | 1 | 0 |
| IQSEC2   | chrX  | 53284028/C//T     | nonsynonymous | 1 | 0 |
| ARID1A   | chr1  | 27106177/TC//T    | nonsynonymous | 1 | 0 |
| AHDC1    | chr1  | 27876459/G//A     | nonsynonymous | 1 | 0 |
| TAF12    | chr1  | 28929974/C//A     | synonymous    | 1 | 0 |
| USP24    | chr1  | 55611703/A//C     | nonsynonymous | 1 | 0 |
| OLFM3    | chr1  | 102270326/A//G    | nonsynonymous | 1 | 0 |
| TROVE2   | chr1  | 193038643/G//A    | synonymous    | 1 | 0 |
| ELF3     | chr1  | 201981520/A//G    | nonsynonymous | 1 | 0 |
| PLEKHA6  | chr1  | 204236633/GGAC//G | nonsynonymous | 1 | 0 |
| TRIM54   | chr2  | 27505591/A//C     | synonymous    | 1 | 0 |
| SOCS5    | chr2  | 46986818/G//A     | nonsynonymous | 1 | 0 |
| FER1L5   | chr2  | 97370431/T//A     | synonymous    | 1 | 0 |
| TBC1D8   | chr2  | 101624402/A//C    | nonsynonymous | 1 | 0 |
| SULT1C4  | chr2  | 109002830/T//C    | nonsynonymous | 1 | 0 |
| NCKAP5   | chr2  | 133541098/C//T    | nonsynonymous | 1 | 0 |
| ANKRD44  | chr2  | 197990573/G//A    | synonymous    | 1 | 0 |
| UGT1A3   | chr2  | 234638367/A//G    | nonsynonymous | 1 | 0 |
| XYLB     | chr3  | 38438587/C//A     | nonsynonymous | 1 | 0 |
| ULK4     | chr3  | 41938339/G//A     | nonsynonymous | 1 | 0 |
| HTT      | chr4  | 3235072/G//C      | synonymous    | 1 | 0 |
| BLOC1S4  | chr4  | 6717936/C//G      | synonymous    | 1 | 0 |
| NUP54    | chr4  | 77069526/A//G     | nonsynonymous | 1 | 0 |
| TIGD4    | chr4  | 153690731/T//C    | nonsynonymous | 1 | 0 |
| CDH18    | chr5  | 19571863/G//T     | nonsynonymous | 1 | 0 |
| GOLPH3   | chr5  | 32126313/C//T     | synonymous    | 1 | 0 |
| CCDC112  | chr5  | 114604607/A//G    | nonsynonymous | 1 | 0 |
| WNT8A    | chr5  | 137424682/T//A    | nonsynonymous | 1 | 0 |
| NDUFA2   | chr5  | 140027150/T//G    | nonsynonymous | 1 | 0 |
| LCP2     | chr5  | 169677886/C//A    | nonsynonymous | 1 | 0 |
| EYS      | chr6  | 64431050/A//G     | synonymous    | 1 | 0 |
| GPC2     | chr7  | 99769474/C//T     | synonymous    | 1 | 0 |
| FBXO24   | chr7  | 100189359/T//A    | nonsynonymous | 1 | 0 |
| LRWD1    | chr7  | 102112658/C//T    | synonymous    | 1 | 0 |

|           |       |                  |               |   |   |
|-----------|-------|------------------|---------------|---|---|
| SSPO      | chr7  | 149504000/C//T   | nonsynonymous | 1 | 0 |
| CHMP7     | chr8  | 23104362/A//C    | nonsynonymous | 1 | 0 |
| PCMTD1    | chr8  | 52733173/C//T    | nonsynonymous | 1 | 0 |
| RUNX1T1   | chr8  | 93026943/T//C    | nonsynonymous | 1 | 0 |
| SDC2      | chr8  | 97605773/A//T    | synonymous    | 1 | 0 |
| RFX3      | chr9  | 3266221/A//G     | nonsynonymous | 1 | 0 |
| IFNA1     | chr9  | 21440665/G//C    | synonymous    | 1 | 0 |
| NTRK2     | chr9  | 87342641/G//A    | nonsynonymous | 1 | 0 |
| IFIT1     | chr10 | 91162822/A//C    | nonsynonymous | 1 | 0 |
| FRA10AC1  | chr10 | 95458057/C//T    | nonsynonymous | 1 | 0 |
| MRVI1     | chr11 | 10647853/G//A    | nonsynonymous | 1 | 0 |
| NUCB2     | chr11 | 17316952/G//A    | nonsynonymous | 1 | 0 |
| E2F8      | chr11 | 19246893/C//A    | nonsynonymous | 1 | 0 |
| OR4A47    | chr11 | 48510624/T//A    | nonsynonymous | 1 | 0 |
| CEP295    | chr11 | 93431708/G//A    | synonymous    | 1 | 0 |
| DYNC2H1   | chr11 | 102988533/T//C   | nonsynonymous | 1 | 0 |
| ABCG4     | chr11 | 119025563/T//A   | synonymous    | 1 | 0 |
| VSIG2     | chr11 | 124619712/C//T   | nonsynonymous | 1 | 0 |
| ADAMTS8   | chr11 | 130275876/G//A   | synonymous    | 1 | 0 |
| ITPR2     | chr12 | 26492400/T//C    | nonsynonymous | 1 | 0 |
| MAP3K12   | chr12 | 53879230/T//C    | nonsynonymous | 1 | 0 |
| FRS2      | chr12 | 69968697/A//C    | synonymous    | 1 | 0 |
| TMTC3     | chr12 | 88589406/C//G    | nonsynonymous | 1 | 0 |
| CDK17     | chr12 | 96676384/A//C    | synonymous    | 1 | 0 |
| SOS2      | chr14 | 50626736/T//C    | nonsynonymous | 1 | 0 |
| PTGDR     | chr14 | 52734783/T//C    | nonsynonymous | 1 | 0 |
| OCA2      | chr15 | 28202801/G//A    | nonsynonymous | 1 | 0 |
| TRPM7     | chr15 | 50884697/T//A    | synonymous    | 1 | 0 |
| SLTM      | chr15 | 59225608/T//C    | nonsynonymous | 1 | 0 |
| MEGF11    | chr15 | 66209171/G//C    | nonsynonymous | 1 | 0 |
| PARP6     | chr15 | 72548885/G//A    | nonsynonymous | 1 | 0 |
|           | chr15 | 101454856/T//C   | synonymous    | 1 | 0 |
| FAHD1     | chr16 | 1877259/T//C     | nonsynonymous | 1 | 0 |
| RABEP1    | chr17 | 5289508/A//C     | synonymous    | 1 | 0 |
| CDK12     | chr17 | 37682569/G//A    | nonsynonymous | 1 | 0 |
| RNF213    | chr17 | 78354771/C//T    | nonsynonymous | 1 | 0 |
| SWSAP1    | chr19 | 11486385/G//T    | nonsynonymous | 1 | 0 |
| ZNF91     | chr19 | 23543978/A//G    | synonymous    | 1 | 0 |
| ZNF681    | chr19 | 23926644/C//A    | nonsynonymous | 1 | 0 |
| CYP2F1    | chr19 | 41622503/C//A    | nonsynonymous | 1 | 0 |
| MEGF8     | chr19 | 42848939/A//G    | nonsynonymous | 1 | 0 |
| PSG3      | chr19 | 43237162/G//T    | nonsynonymous | 1 | 0 |
| NLRP5     | chr19 | 56538643/G//A    | synonymous    | 1 | 0 |
| ZNF749    | chr19 | 57953265/T//A    | nonsynonymous | 1 | 0 |
| RBCK1     | chr20 | 409643/G//T      | nonsynonymous | 1 | 0 |
| DEFB121   | chr20 | 29993974/G//A    | synonymous    | 1 | 0 |
| SNTA1     | chr20 | 32005646/G//A    | nonsynonymous | 1 | 0 |
| PLTP      | chr20 | 44538268/G//A    | synonymous    | 1 | 0 |
| KRTAP19-3 | chr21 | 31863987/A//G    | synonymous    | 1 | 0 |
| TCP10L    | chr21 | 33954592/A//T    | nonsynonymous | 1 | 0 |
|           | chr21 | 37444697/G//T    | synonymous    | 1 | 0 |
| DDTL      | chr22 | 24313596/GGAT//G | synonymous    | 1 | 0 |
| DEPDC5    | chr22 | 32180797/C//G    | synonymous    | 1 | 0 |
| ATP7A     | chrX  | 77298207/T//C    | nonsynonymous | 1 | 0 |
| LCE2D     | chr1  | 152636595/A//C   | nonsynonymous | 0 | 1 |
| DCST2     | chr1  | 155002711/T//C   | synonymous    | 0 | 1 |
| SULT6B1   | chr2  | 37402363/C//A    | nonsynonymous | 0 | 1 |
| OLA1      | chr2  | 175087815/C//A   | nonsynonymous | 0 | 1 |
| DAAM2     | chr6  | 39836633/G//T    | nonsynonymous | 0 | 1 |
| MUC17     | chr7  | 100676265/T//G   | nonsynonymous | 0 | 1 |
| DPP6      | chr7  | 154263926/G//T   | nonsynonymous | 0 | 1 |
| TULP3     | chr12 | 3046899/A//G     | synonymous    | 0 | 1 |
| ZNF493    | chr19 | 21606567/G//T    | nonsynonymous | 0 | 1 |
| ZNF493    | chr19 | 21606579/G//A    | nonsynonymous | 0 | 1 |
| ZNF493    | chr19 | 21606587/C//T    | nonsynonymous | 0 | 1 |
| ZNF493    | chr19 | 21606594/A//G    | nonsynonymous | 0 | 1 |
| KCNG1     | chr20 | 49620953/C//T    | nonsynonymous | 0 | 1 |
| ACAP3     | chr1  | 1235356/G//A     | synonymous    | 1 | 0 |
| NT5C1A    | chr1  | 40124856/A//G    | synonymous    | 1 | 0 |
| RLF       | chr1  | 40704503/A//C    | nonsynonymous | 1 | 0 |

|           |       |                            |               |   |   |
|-----------|-------|----------------------------|---------------|---|---|
| PATJ      | chr1  | 62594608/T//C              | synonymous    | 1 | 0 |
| PTGFRN    | chr1  | 117527323/C//G             | nonsynonymous | 1 | 0 |
| BLZF1     | chr1  | 169347631/G//C             | nonsynonymous | 1 | 0 |
| TMCC2     | chr1  | 205238494/C//T             | synonymous    | 1 | 0 |
| IL10      | chr1  | 206944411/G//A             | synonymous    | 1 | 0 |
| NID1      | chr1  | 236141141/G//C             | synonymous    | 1 | 0 |
| DHX57     | chr2  | 39046214/G//C              | nonsynonymous | 1 | 0 |
| TTN       | chr2  | 179444376/C//T             | synonymous    | 1 | 0 |
| ZNF142    | chr2  | 219509184/T//A             | synonymous    | 1 | 0 |
| NYAP2     | chr2  | 226491836/A//C             | nonsynonymous | 1 | 0 |
| VILL      | chr3  | 38035915/A//G              | nonsynonymous | 1 | 0 |
| PHLDB2    | chr3  | 111651212/A//G             | nonsynonymous | 1 | 0 |
| ZBTB38    | chr3  | 141164720/G//A             | nonsynonymous | 1 | 0 |
| SAMD7     | chr3  | 169644376/G//A             | nonsynonymous | 1 | 0 |
| TBC1D19   | chr4  | 26585857/G//C              | nonsynonymous | 1 | 0 |
| CLPTM1L   | chr5  | 1338031/C//T               | synonymous    | 1 | 0 |
| AMACR     | chr5  | 33989473/C//T              | nonsynonymous | 1 | 0 |
| MCTP1     | chr5  | 94259719/G//C              | nonsynonymous | 1 | 0 |
| PCDHB6    | chr5  | 140530453/C//A             | synonymous    | 1 | 0 |
| ARHGEF37  | chr5  | 149008460/C//G             | nonsynonymous | 1 | 0 |
| ZFP62     | chr5  | 180278047/A//C             | nonsynonymous | 1 | 0 |
| SLC35A1   | chr6  | 88221233/A//G              | nonsynonymous | 1 | 0 |
| CYP2W1    | chr7  | 1027174/C//T               | synonymous    | 1 | 0 |
| HNRNPA2B1 | chr7  | 26233248/C//G              | nonsynonymous | 1 | 0 |
| GHRHR     | chr7  | 31010759/T//G              | nonsynonymous | 1 | 0 |
| AMPH      | chr7  | 38471815/G//A              | synonymous    | 1 | 0 |
| GSAP      | chr7  | 76943803/A//T              | nonsynonymous | 1 | 0 |
| NUP205    | chr7  | 135307609/G//C             | nonsynonymous | 1 | 0 |
| TTC26     | chr7  | 138818574/G//T             | synonymous    | 1 | 0 |
| KMT2C     | chr7  | 151878301/G//A             | nonsynonymous | 1 | 0 |
| FZD3      | chr8  | 28420463/A//G              | nonsynonymous | 1 | 0 |
| SLC25A32  | chr8  | 104413864/G//T             | nonsynonymous | 1 | 0 |
| EPPK1     | chr8  | 144942235/G//A             | synonymous    | 1 | 0 |
| SLC1A1    | chr9  | 4585449/C//G               | nonsynonymous | 1 | 0 |
| ZBTB26    | chr9  | 125681594/T//A             | nonsynonymous | 1 | 0 |
| PRRC2B    | chr9  | 134357930/C//G             | nonsynonymous | 1 | 0 |
| DHTKD1    | chr10 | 12160855/A//G              | nonsynonymous | 1 | 0 |
| DDX50     | chr10 | 70673023/T//C              | nonsynonymous | 1 | 0 |
| TACC2     | chr10 | 123843331/C//T             | nonsynonymous | 1 | 0 |
| ANO3      | chr11 | 26619968/G//T              | nonsynonymous | 1 | 0 |
| FIBIN     | chr11 | 27016612/C//G              | nonsynonymous | 1 | 0 |
| LMO2      | chr11 | 33881105/C//T              | nonsynonymous | 1 | 0 |
| CKAP5     | chr11 | 46811714/G//T              | nonsynonymous | 1 | 0 |
| MTMR2     | chr11 | 95578126/TCGATGTCCAAAACCTT | nonsynonymous | 1 | 0 |
| IGSF9B    | chr11 | 133791255/T//C             | nonsynonymous | 1 | 0 |
| METTL25   | chr12 | 82850590/T//C              | synonymous    | 1 | 0 |
| RPL10L    | chr14 | 47120477/C//T              | nonsynonymous | 1 | 0 |
| MAP3K9    | chr14 | 71197427/C//T              | synonymous    | 1 | 0 |
| TJP1      | chr15 | 30025440/G//A              | nonsynonymous | 1 | 0 |
| TJP1      | chr15 | 30025442/G//A              | nonsynonymous | 1 | 0 |
| GABPB1    | chr15 | 50570713/C//A              | synonymous    | 1 | 0 |
| ANKRD34C  | chr15 | 79585908/C//T              | synonymous    | 1 | 0 |
| ECI1      | chr16 | 2296858/A//G               | nonsynonymous | 1 | 0 |
| MYO18A    | chr17 | 27417564/C//T              | nonsynonymous | 1 | 0 |
| TAF15     | chr17 | 34151147/G//A              | nonsynonymous | 1 | 0 |
| DSC2      | chr18 | 28649083/C//G              | nonsynonymous | 1 | 0 |
| PIGN      | chr18 | 59713164/G//A              | synonymous    | 1 | 0 |
| CNN1      | chr19 | 11660540/C//G              | nonsynonymous | 1 | 0 |
| BRD4      | chr19 | 15366994/C//T              | synonymous    | 1 | 0 |
| PDE4C     | chr19 | 18343948/G//T              | synonymous    | 1 | 0 |
| CATSPERG  | chr19 | 38834239/G//C              | nonsynonymous | 1 | 0 |
| LTBP4     | chr19 | 41119382/C//T              | nonsynonymous | 1 | 0 |
| PRMT1     | chr19 | 50180558/G//C              | synonymous    | 1 | 0 |
| ZNF665    | chr19 | 53678798/G//A              | synonymous    | 1 | 0 |
| SIGLEC1   | chr20 | 3687764/C//A               | nonsynonymous | 1 | 0 |
| ZFP64     | chr20 | 50776688/A//G              | nonsynonymous | 1 | 0 |
| POTED     | chr21 | 15013735/A//G              | nonsynonymous | 1 | 0 |
| DDX53     | chrX  | 23020019/A//G              | synonymous    | 1 | 0 |
| XK        | chrX  | 37553670/A//G              | nonsynonymous | 1 | 0 |
| USP11     | chrX  | 47104080/G//C              | nonsynonymous | 1 | 0 |

|          |       |                |               |   |   |
|----------|-------|----------------|---------------|---|---|
| IGSF1    | chrX  | 130420665/G//A | synonymous    | 1 | 0 |
| SLC9A6   | chrX  | 135095108/G//C | nonsynonymous | 1 | 0 |
| RAB39B   | chrX  | 154490399/C//G | nonsynonymous | 1 | 0 |
| KANSL3   | chr2  | 97302850/C//T  | nonsynonymous | 0 | 1 |
| BSN      | chr3  | 49700826/G//A  | synonymous    | 0 | 1 |
| SPATA6L  | chr9  | 4629172/T//A   | synonymous    | 0 | 1 |
| TMEM159  | chr16 | 21190854/T//C  | nonsynonymous | 0 | 1 |
| PLCD3    | chr17 | 43195689/C//T  | nonsynonymous | 0 | 1 |
| DDX42    | chr17 | 61889348/G//C  | nonsynonymous | 0 | 1 |
| ZNF493   | chr19 | 21606544/C//T  | synonymous    | 0 | 1 |
| CEP104   | chr1  | 3746354/C//T   | nonsynonymous | 1 | 0 |
| AJAP1    | chr1  | 4772361/G//A   | nonsynonymous | 1 | 0 |
| NPHP4    | chr1  | 5925300/C//T   | nonsynonymous | 1 | 0 |
| TNFRSF9  | chr1  | 7993277/G//A   | synonymous    | 1 | 0 |
| KAZN     | chr1  | 15441066/C//T  | nonsynonymous | 1 | 0 |
| SRSF10   | chr1  | 24297734/T//C  | synonymous    | 1 | 0 |
| BSDC1    | chr1  | 32852428/C//T  | synonymous    | 1 | 0 |
| TRIM62   | chr1  | 33612990/G//A  | nonsynonymous | 1 | 0 |
| ZMYM1    | chr1  | 35570335/T//G  | nonsynonymous | 1 | 0 |
| SCMH1    | chr1  | 41625486/A//C  | synonymous    | 1 | 0 |
| PPCS     | chr1  | 42925492/G//A  | synonymous    | 1 | 0 |
| STIL     | chr1  | 47765628/T//G  | nonsynonymous | 1 | 0 |
| TRABD2B  | chr1  | 48267183/C//T  | nonsynonymous | 1 | 0 |
| ABCA4    | chr1  | 94495043/C//A  | synonymous    | 1 | 0 |
| VAV3     | chr1  | 108185236/A//G | synonymous    | 1 | 0 |
| CREB3L4  | chr1  | 153941008/C//T | nonsynonymous | 1 | 0 |
| FCRL2    | chr1  | 157736705/C//T | nonsynonymous | 1 | 0 |
| CRP      | chr1  | 159683783/A//C | nonsynonymous | 1 | 0 |
| RXRG     | chr1  | 165389229/C//A | nonsynonymous | 1 | 0 |
| RXRG     | chr1  | 165398062/T//G | nonsynonymous | 1 | 0 |
| TNR      | chr1  | 175372551/C//T | nonsynonymous | 1 | 0 |
| SEC16B   | chr1  | 177908830/T//C | synonymous    | 1 | 0 |
| AXDND1   | chr1  | 179460838/A//C | synonymous    | 1 | 0 |
| HMCN1    | chr1  | 186026487/A//C | nonsynonymous | 1 | 0 |
| ZBED6    | chr1  | 203766686/A//C | synonymous    | 1 | 0 |
| ZBED6    | chr1  | 203766880/A//C | nonsynonymous | 1 | 0 |
| PLEKHA6  | chr1  | 204226699/C//T | nonsynonymous | 1 | 0 |
| PPP1R15B | chr1  | 204380372/G//A | synonymous    | 1 | 0 |
| RASSF5   | chr1  | 206680917/C//G | synonymous    | 1 | 0 |
| DISP1    | chr1  | 223178441/T//C | synonymous    | 1 | 0 |
| DNAH14   | chr1  | 225347105/A//C | nonsynonymous | 1 | 0 |
| ENAH     | chr1  | 225700608/A//C | synonymous    | 1 | 0 |
| TRIM17   | chr1  | 228596410/A//C | nonsynonymous | 1 | 0 |
| RYR2     | chr1  | 237824227/C//T | nonsynonymous | 1 | 0 |
| NLRP3    | chr1  | 247599375/G//A | nonsynonymous | 1 | 0 |
| SH3YL1   | chr2  | 218777/T//G    | synonymous    | 1 | 0 |
| MYT1L    | chr2  | 1926189/T//G   | nonsynonymous | 1 | 0 |
| AGBL5    | chr2  | 27279532/A//C  | synonymous    | 1 | 0 |
| C2orf71  | chr2  | 29294944/T//C  | synonymous    | 1 | 0 |
| C2orf71  | chr2  | 29296991/T//G  | nonsynonymous | 1 | 0 |
| SRBD1    | chr2  | 45616498/A//C  | nonsynonymous | 1 | 0 |
| ADD2     | chr2  | 70910888/C//T  | synonymous    | 1 | 0 |
| CYP26B1  | chr2  | 72360318/C//T  | nonsynonymous | 1 | 0 |
| TLX2     | chr2  | 74742016/C//T  | nonsynonymous | 1 | 0 |
| DNAH6    | chr2  | 84897519/A//T  | nonsynonymous | 1 | 0 |
| C2orf68  | chr2  | 85839024/A//G  | synonymous    | 1 | 0 |
| SMYD1    | chr2  | 88405988/A//T  | nonsynonymous | 1 | 0 |
| IL18R1   | chr2  | 102998119/T//G | nonsynonymous | 1 | 0 |
| NCK2     | chr2  | 106471636/G//A | nonsynonymous | 1 | 0 |
| DDX18    | chr2  | 118582533/T//G | synonymous    | 1 | 0 |
| MYO7B    | chr2  | 128338393/T//C | nonsynonymous | 1 | 0 |
| R3HDM1   | chr2  | 136393651/T//C | synonymous    | 1 | 0 |
| CCDC148  | chr2  | 159165952/T//C | nonsynonymous | 1 | 0 |
| HOXD4    | chr2  | 177017392/C//A | nonsynonymous | 1 | 0 |
| TTN      | chr2  | 179438362/C//A | nonsynonymous | 1 | 0 |
| TTN      | chr2  | 179462342/C//T | nonsynonymous | 1 | 0 |
| CCDC141  | chr2  | 179721049/A//C | nonsynonymous | 1 | 0 |
| UBE2E3   | chr2  | 181846912/A//C | nonsynonymous | 1 | 0 |
| FSIP2    | chr2  | 186657485/T//G | nonsynonymous | 1 | 0 |
| ITGAV    | chr2  | 187466775/C//T | synonymous    | 1 | 0 |

|          |      |                         |               |   |   |
|----------|------|-------------------------|---------------|---|---|
| DIRC1    | chr2 | 189599379/T//G          | nonsynonymous | 1 | 0 |
| PMS1     | chr2 | 190728866/G//A          | nonsynonymous | 1 | 0 |
| HECW2    | chr2 | 197184123/A//G          | synonymous    | 1 | 0 |
| SCG2     | chr2 | 224462218/C//T          | nonsynonymous | 1 | 0 |
| IRS1     | chr2 | 227660885/C//T          | nonsynonymous | 1 | 0 |
| FANCD2   | chr3 | 10081473/C//T           | synonymous    | 1 | 0 |
| ATG7     | chr3 | 11340213/T//G           | nonsynonymous | 1 | 0 |
| RAF1     | chr3 | 12641896/T//C           | nonsynonymous | 1 | 0 |
| LRRFIP2  | chr3 | 37107769/T//G           | synonymous    | 1 | 0 |
| SLC22A14 | chr3 | 38354563/G//A           | nonsynonymous | 1 | 0 |
| ACVR2B   | chr3 | 38521253/T//C           | nonsynonymous | 1 | 0 |
| MYRIP    | chr3 | 39942341/G//A           | nonsynonymous | 1 | 0 |
| ULK4     | chr3 | 41759295/T//G           | nonsynonymous | 1 | 0 |
| ZMYND10  | chr3 | 50379354/T//A           | nonsynonymous | 1 | 0 |
| GRM2     | chr3 | 51747011/A//G           | nonsynonymous | 1 | 0 |
| DNAH12   | chr3 | 57394029/T//G           | nonsynonymous | 1 | 0 |
| CADPS    | chr3 | 62543155/G//A           | nonsynonymous | 1 | 0 |
| ZNF717   | chr3 | 75787231/T//G           | nonsynonymous | 1 | 0 |
| ADGRG7   | chr3 | 100365553/T//G          | nonsynonymous | 1 | 0 |
| SLC9C1   | chr3 | 111993740/T//C          | synonymous    | 1 | 0 |
| POLQ     | chr3 | 121264564/G//A          | nonsynonymous | 1 | 0 |
| COL6A5   | chr3 | 130148429/G//A          | nonsynonymous | 1 | 0 |
| CEP70    | chr3 | 138248235/A//G          | synonymous    | 1 | 0 |
| FAIM     | chr3 | 138341054/T//G          | nonsynonymous | 1 | 0 |
| EIF2A    | chr3 | 150264581/C//T          | synonymous    | 1 | 0 |
| AADAC    | chr3 | 151546016/T//G          | synonymous    | 1 | 0 |
| SPATA16  | chr3 | 172834969/A//G          | nonsynonymous | 1 | 0 |
| MAP3K13  | chr3 | 185198203/T//C          | synonymous    | 1 | 0 |
| SENP2    | chr3 | 185329464/T//G          | nonsynonymous | 1 | 0 |
| ZNF595   | chr4 | 53310/C//T              | synonymous    | 1 | 0 |
| LCORL    | chr4 | 17885717/A//C           | nonsynonymous | 1 | 0 |
| KIT      | chr4 | 55599298/T//G           | nonsynonymous | 1 | 0 |
| UBA6     | chr4 | 68492134/T//A           | nonsynonymous | 1 | 0 |
| UGT2B15  | chr4 | 69535906/G//A           | nonsynonymous | 1 | 0 |
| CNOT6L   | chr4 | 78695831/G//A           | nonsynonymous | 1 | 0 |
| MAPK10   | chr4 | 87080444/C//T           | synonymous    | 1 | 0 |
| ABCG2    | chr4 | 89013444/A//C           | nonsynonymous | 1 | 0 |
|          | chr4 | 106833380/A//C          | synonymous    | 1 | 0 |
| CFI      | chr4 | 110687738/A//C          | nonsynonymous | 1 | 0 |
| TRAM1L1  | chr4 | 118005652/C//T          | nonsynonymous | 1 | 0 |
| QRFPR    | chr4 | 122257997/C//T          | nonsynonymous | 1 | 0 |
| TRPC3    | chr4 | 122872662/C//T          | synonymous    | 1 | 0 |
| SPATA5   | chr4 | 123854599/A//C          | nonsynonymous | 1 | 0 |
| SCLT1    | chr4 | 129869644/T//G          | synonymous    | 1 | 0 |
| FBXW7    | chr4 | 153253743/CTTACCCTCT//C | nonsynonymous | 1 | 0 |
| TLR3     | chr4 | 187003641/T//C          | synonymous    | 1 | 0 |
| CTNND2   | chr5 | 10988315/T//G           | nonsynonymous | 1 | 0 |
| DROSHA   | chr5 | 31529209/A//G           | synonymous    | 1 | 0 |
| PRLR     | chr5 | 35066154/A//G           | synonymous    | 1 | 0 |
| PRLR     | chr5 | 35070347/T//A           | nonsynonymous | 1 | 0 |
| IPO11    | chr5 | 61747654/A//C           | nonsynonymous | 1 | 0 |
| IQGAP2   | chr5 | 75969868/T//A           | synonymous    | 1 | 0 |
| VCAN     | chr5 | 82786137/C//T           | synonymous    | 1 | 0 |
| ERAP2    | chr5 | 96237330/C//T           | nonsynonymous | 1 | 0 |
| NUDT12   | chr5 | 102894981/T//C          | nonsynonymous | 1 | 0 |
| COMMD10  | chr5 | 115423281/G//A          | synonymous    | 1 | 0 |
| DMXL1    | chr5 | 118468944/A//G          | nonsynonymous | 1 | 0 |
| ADAMTS19 | chr5 | 128958007/T//G          | nonsynonymous | 1 | 0 |
| DCANP1   | chr5 | 134782781/T//C          | synonymous    | 1 | 0 |
| PCDHB8   | chr5 | 140559742/C//T          | synonymous    | 1 | 0 |
| PCDHGB1  | chr5 | 140730281/G//A          | nonsynonymous | 1 | 0 |
| PCDHGA5  | chr5 | 140744632/C//T          | synonymous    | 1 | 0 |
| PCDH1    | chr5 | 141244104/C//T          | nonsynonymous | 1 | 0 |
| SH3RF2   | chr5 | 145427343/T//G          | synonymous    | 1 | 0 |
| PPARGC1B | chr5 | 149214875/T//C          | nonsynonymous | 1 | 0 |
| HAVCR2   | chr5 | 156533664/A//C          | nonsynonymous | 1 | 0 |
| CDHR2    | chr5 | 176008491/G//T          | nonsynonymous | 1 | 0 |
| BTN3A3   | chr6 | 26448673/A//C           | synonymous    | 1 | 0 |
| TRIM39   | chr6 | 30309774/G//A           | nonsynonymous | 1 | 0 |
| LTB      | chr6 | 31549353/G//A           | nonsynonymous | 1 | 0 |



|              |       |                            |               |   |   |
|--------------|-------|----------------------------|---------------|---|---|
| CFB          | chr6  | 31916652/CA/C              | nonsynonymous | 1 | 0 |
| TNXB         | chr6  | 32011551/C/T               | synonymous    | 1 | 0 |
| COL11A2      | chr6  | 33147257/A/G               | nonsynonymous | 1 | 0 |
| PI16         | chr6  | 36926964/G/A               | nonsynonymous | 1 | 0 |
| DNAH8        | chr6  | 38691120/T/G               | nonsynonymous | 1 | 0 |
| DNAH8        | chr6  | 38854694/G/T               | nonsynonymous | 1 | 0 |
| SRF          | chr6  | 43146835/G/A               | nonsynonymous | 1 | 0 |
| ABCC10       | chr6  | 43417245/A/C               | nonsynonymous | 1 | 0 |
| CD2AP        | chr6  | 47573976/G/A               | nonsynonymous | 1 | 0 |
| COL12A1      | chr6  | 75899084/A/C               | nonsynonymous | 1 | 0 |
| LAMA4        | chr6  | 112462115/T/G              | nonsynonymous | 1 | 0 |
| FAM184A      | chr6  | 119296260/G/A              | synonymous    | 1 | 0 |
| SMPDL3A      | chr6  | 123130254/T/G              | nonsynonymous | 1 | 0 |
| THEMIS       | chr6  | 128134644/G/A              | nonsynonymous | 1 | 0 |
| LAMA2        | chr6  | 129573434/T/A              | nonsynonymous | 1 | 0 |
|              | chr6  | 134498900/T/C              | synonymous    | 1 | 0 |
| AGPAT4       | chr6  | 161570290/G/A              | synonymous    | 1 | 0 |
| AGPAT4       | chr6  | 161575251/T/G              | nonsynonymous | 1 | 0 |
| GNA12        | chr7  | 2834656/G/A                | nonsynonymous | 1 | 0 |
| WIPI2        | chr7  | 5256293/G/A                | synonymous    | 1 | 0 |
| USP42        | chr7  | 6189360/A/G                | synonymous    | 1 | 0 |
| ABCA13       | chr7  | 48280594/C/T               | nonsynonymous | 1 | 0 |
| ZNF727       | chr7  | 63537907/C/T               | synonymous    | 1 | 0 |
| RHBDD2       | chr7  | 75508356/G/A               | synonymous    | 1 | 0 |
| PCLO         | chr7  | 82455931/A/C               | nonsynonymous | 1 | 0 |
| BAIAP2L1     | chr7  | 97923404/G/A               | nonsynonymous | 1 | 0 |
| MUC17        | chr7  | 100680574/T/G              | synonymous    | 1 | 0 |
| CDHR3        | chr7  | 105673030/G/A              | nonsynonymous | 1 | 0 |
| SLC26A4      | chr7  | 107355940/C/T              | synonymous    | 1 | 0 |
| FOXP2        | chr7  | 114302182/A/G              | synonymous    | 1 | 0 |
| CFTR         | chr7  | 117232014/A/T              | nonsynonymous | 1 | 0 |
| MEST         | chr7  | 130144793/C/T              | nonsynonymous | 1 | 0 |
| OR9A2        | chr7  | 142724096/T/C              | nonsynonymous | 1 | 0 |
| PIP          | chr7  | 142829240/A/T              | nonsynonymous | 1 | 0 |
| ESYT2        | chr7  | 158534396/T/C              | synonymous    | 1 | 0 |
| XKR4         | chr8  | 56270411/A/G               | nonsynonymous | 1 | 0 |
| LOC101929415 | chr8  | 57358592/A/C               | synonymous    | 1 | 0 |
| ZFH4         | chr8  | 77765507/T/C               | nonsynonymous | 1 | 0 |
| POP1         | chr8  | 99148759/A/C               | nonsynonymous | 1 | 0 |
| TRPS1        | chr8  | 116599498/T/C              | synonymous    | 1 | 0 |
| TAF2         | chr8  | 120809934/T/G              | nonsynonymous | 1 | 0 |
| DENND3       | chr8  | 142170832/A/C              | nonsynonymous | 1 | 0 |
| SPATC1       | chr8  | 145095094/A/G              | nonsynonymous | 1 | 0 |
| SPATC1       | chr8  | 145101649/C/T              | nonsynonymous | 1 | 0 |
| SCRT1        | chr8  | 145557134/C/T              | nonsynonymous | 1 | 0 |
| C8orf82      | chr8  | 145752962/G/A              | nonsynonymous | 1 | 0 |
| RLN1         | chr9  | 5335500/A/G                | synonymous    | 1 | 0 |
| MPDZ         | chr9  | 13137949/A/C               | synonymous    | 1 | 0 |
| ADAMTSL1     | chr9  | 18817110/A/G               | nonsynonymous | 1 | 0 |
| TMEM215      | chr9  | 32784771/T/C               | nonsynonymous | 1 | 0 |
| TRPM3        | chr9  | 73151277/A/G               | synonymous    | 1 | 0 |
| ZNF484       | chr9  | 95610229/T/G               | nonsynonymous | 1 | 0 |
| HSD17B3      | chr9  | 99007623/T/C               | synonymous    | 1 | 0 |
| CORO2A       | chr9  | 100888982/T/G              | nonsynonymous | 1 | 0 |
| SVEP1        | chr9  | 113213589/G/A              | nonsynonymous | 1 | 0 |
| DNAJC25      | chr9  | 114412197/T/G              | nonsynonymous | 1 | 0 |
| RGS3         | chr9  | 116359311/C/T              | synonymous    | 1 | 0 |
| POMT1        | chr9  | 134396857/A/G              | nonsynonymous | 1 | 0 |
| QSOX2        | chr9  | 139107119/T/C              | nonsynonymous | 1 | 0 |
| ITIH2        | chr10 | 7772099/A/G                | synonymous    | 1 | 0 |
| DCLRE1C      | chr10 | 14976415/ATAT//A           | nonsynonymous | 1 | 0 |
| ENKUR        | chr10 | 25273759/T/C               | nonsynonymous | 1 | 0 |
| GAD2         | chr10 | 26505588/C/T               | synonymous    | 1 | 0 |
| BMS1         | chr10 | 43279985/A/G               | nonsynonymous | 1 | 0 |
| CDH23        | chr10 | 73562805/A/C               | nonsynonymous | 1 | 0 |
| SPOCK2       | chr10 | 73828052/A/G               | nonsynonymous | 1 | 0 |
| ECD          | chr10 | 74897757/T/G               | synonymous    | 1 | 0 |
| KAT6B        | chr10 | 76744857/A/C               | nonsynonymous | 1 | 0 |
| DLG5         | chr10 | 79588632/AGACTTACCGCAAC//A | nonsynonymous | 1 | 0 |
| LRIT1        | chr10 | 85991664/A/G               | synonymous    | 1 | 0 |

|             |       |                |               |   |   |
|-------------|-------|----------------|---------------|---|---|
| HTR7        | chr10 | 92503358/C//T  | nonsynonymous | 1 | 0 |
| PPP1R3C     | chr10 | 93390320/T//C  | synonymous    | 1 | 0 |
| BTA1F1      | chr10 | 93716974/T//A  | synonymous    | 1 | 0 |
| PSD         | chr10 | 104176552/G//T | nonsynonymous | 1 | 0 |
| ZDHHC6      | chr10 | 114205100/G//A | nonsynonymous | 1 | 0 |
| NRAP        | chr10 | 115357780/A//G | nonsynonymous | 1 | 0 |
| ATRNL1      | chr10 | 116881494/C//T | nonsynonymous | 1 | 0 |
| CCDC172     | chr10 | 118100276/T//G | nonsynonymous | 1 | 0 |
| EMX2        | chr10 | 119305166/T//G | nonsynonymous | 1 | 0 |
| NPS         | chr10 | 129350730/G//A | nonsynonymous | 1 | 0 |
| ODF3        | chr11 | 200034/C//T    | synonymous    | 1 | 0 |
| DNHD1       | chr11 | 6560457/C//T   | synonymous    | 1 | 0 |
| STK33       | chr11 | 8496460/A//C   | synonymous    | 1 | 0 |
| SBF2        | chr11 | 9802059/T//C   | nonsynonymous | 1 | 0 |
| ADM         | chr11 | 10327219/T//C  | synonymous    | 1 | 0 |
| PLEKHA7     | chr11 | 16863170/T//C  | nonsynonymous | 1 | 0 |
| BDNF        | chr11 | 27679477/T//A  | nonsynonymous | 1 | 0 |
| HIPK3       | chr11 | 33361086/T//G  | synonymous    | 1 | 0 |
| PAMR1       | chr11 | 35492234/G//A  | synonymous    | 1 | 0 |
| FJX1        | chr11 | 35641283/T//G  | nonsynonymous | 1 | 0 |
| NUP160      | chr11 | 47830007/A//C  | synonymous    | 1 | 0 |
| OR4C16      | chr11 | 55340499/T//C  | nonsynonymous | 1 | 0 |
| OR5L1       | chr11 | 55579417/C//T  | nonsynonymous | 1 | 0 |
| TMX2-CTNND1 | chr11 | 57575861/G//A  | nonsynonymous | 1 | 0 |
| OR5B17      | chr11 | 58126404/T//G  | nonsynonymous | 1 | 0 |
|             | chr11 | 62259254/T//A  | synonymous    | 1 | 0 |
| CCDC88B     | chr11 | 64120599/C//T  | nonsynonymous | 1 | 0 |
| CCND1       | chr11 | 69456028/C//T  | synonymous    | 1 | 0 |
| CLPB        | chr11 | 72040784/T//G  | nonsynonymous | 1 | 0 |
| NARS2       | chr11 | 78154699/A//C  | synonymous    | 1 | 0 |
| MAML2       | chr11 | 95712475/T//C  | synonymous    | 1 | 0 |
| PGR         | chr11 | 100996782/A//C | nonsynonymous | 1 | 0 |
| MMP10       | chr11 | 102647342/C//T | nonsynonymous | 1 | 0 |
| DYNC2H1     | chr11 | 103106430/T//A | synonymous    | 1 | 0 |
| APOA4       | chr11 | 116692595/G//A | nonsynonymous | 1 | 0 |
| ATP5L       | chr11 | 118272379/C//T | synonymous    | 1 | 0 |
| HINFP       | chr11 | 118997721/T//C | nonsynonymous | 1 | 0 |
| TECTA       | chr11 | 121016795/G//A | nonsynonymous | 1 | 0 |
| TECTA       | chr11 | 121037332/A//G | nonsynonymous | 1 | 0 |
| ZNF202      | chr11 | 123597340/A//G | nonsynonymous | 1 | 0 |
| VWA5A       | chr11 | 124013271/C//T | nonsynonymous | 1 | 0 |
| STT3A       | chr11 | 125483068/C//T | nonsynonymous | 1 | 0 |
|             | chr12 | 974423/A//C    | synonymous    | 1 | 0 |
| KCNA6       | chr12 | 4920129/T//G   | nonsynonymous | 1 | 0 |
| TAS2R7      | chr12 | 10954293/T//G  | synonymous    | 1 | 0 |
| ATF7IP      | chr12 | 14609557/C//T  | synonymous    | 1 | 0 |
| ART4        | chr12 | 14993862/A//C  | nonsynonymous | 1 | 0 |
| PLCZ1       | chr12 | 18847846/T//G  | synonymous    | 1 | 0 |
| ITPR2       | chr12 | 26592163/C//T  | synonymous    | 1 | 0 |
| KMT2D       | chr12 | 49435769/C//T  | nonsynonymous | 1 | 0 |
| KMT2D       | chr12 | 49440390/A//T  | nonsynonymous | 1 | 0 |
| RACGAP1     | chr12 | 50386066/G//A  | nonsynonymous | 1 | 0 |
| ANKRD33     | chr12 | 52284486/G//A  | synonymous    | 1 | 0 |
| KRT75       | chr12 | 52827011/T//G  | nonsynonymous | 1 | 0 |
| KRT77       | chr12 | 53086281/C//T  | nonsynonymous | 1 | 0 |
| B4GALNT1    | chr12 | 58021577/T//C  | nonsynonymous | 1 | 0 |
| OS9         | chr12 | 58109716/G//T  | nonsynonymous | 1 | 0 |
| AGAP2       | chr12 | 58125223/A//C  | nonsynonymous | 1 | 0 |
| TBC1D30     | chr12 | 65269392/T//C  | nonsynonymous | 1 | 0 |
| PTPRQ       | chr12 | 80899880/A//T  | nonsynonymous | 1 | 0 |
| PTPRQ       | chr12 | 80928719/C//T  | nonsynonymous | 1 | 0 |
| TMTC2       | chr12 | 83251012/A//G  | nonsynonymous | 1 | 0 |
| PLXNC1      | chr12 | 94641715/T//G  | nonsynonymous | 1 | 0 |
| METAP2      | chr12 | 95877030/A//C  | nonsynonymous | 1 | 0 |
| TCHP        | chr12 | 110340970/T//C | nonsynonymous | 1 | 0 |
| HECTD4      | chr12 | 112664493/T//C | synonymous    | 1 | 0 |
| P2RX7       | chr12 | 121615145/T//A | nonsynonymous | 1 | 0 |
| NCOR2       | chr12 | 124904573/T//C | nonsynonymous | 1 | 0 |
| GOLGA3      | chr12 | 133381543/C//T | synonymous    | 1 | 0 |
| SLC46A3     | chr13 | 29275525/A//C  | synonymous    | 1 | 0 |

|          |       |                |               |   |   |
|----------|-------|----------------|---------------|---|---|
| CCNA1    | chr13 | 37016808/T//C  | synonymous    | 1 | 0 |
| PROSER1  | chr13 | 39585556/C//A  | synonymous    | 1 | 0 |
| NEK5     | chr13 | 52639378/A//C  | synonymous    | 1 | 0 |
| MYCBP2   | chr13 | 77632438/T//G  | nonsynonymous | 1 | 0 |
| TUBGCP3  | chr13 | 113209310/T//G | nonsynonymous | 1 | 0 |
| PROZ     | chr13 | 113826243/A//G | nonsynonymous | 1 | 0 |
| TEP1     | chr14 | 20845918/A//T  | synonymous    | 1 | 0 |
| TEP1     | chr14 | 20848166/A//C  | nonsynonymous | 1 | 0 |
| CHD8     | chr14 | 21871295/C//T  | nonsynonymous | 1 | 0 |
| CEBPE    | chr14 | 23586802/C//T  | nonsynonymous | 1 | 0 |
| PTGDR    | chr14 | 52734787/T//C  | synonymous    | 1 | 0 |
| KIAA0586 | chr14 | 58932588/T//G  | nonsynonymous | 1 | 0 |
| GPR135   | chr14 | 59931113/T//C  | nonsynonymous | 1 | 0 |
| PLEKHH1  | chr14 | 68052682/T//G  | synonymous    | 1 | 0 |
| PAPLN    | chr14 | 73720567/C//T  | synonymous    | 1 | 0 |
| ENTPD5   | chr14 | 74440675/T//C  | nonsynonymous | 1 | 0 |
| KCNK13   | chr14 | 90651353/A//T  | synonymous    | 1 | 0 |
| CATSPERB | chr14 | 92157898/A//G  | nonsynonymous | 1 | 0 |
| SLC25A29 | chr14 | 100765225/G//A | synonymous    | 1 | 0 |
| DYNC1H1  | chr14 | 102486300/G//A | nonsynonymous | 1 | 0 |
| TEX22    | chr14 | 105878016/C//T | nonsynonymous | 1 | 0 |
| TMEM121  | chr14 | 105995383/A//T | nonsynonymous | 1 | 0 |
| MGA      | chr15 | 42052603/G//A  | nonsynonymous | 1 | 0 |
| TP53BP1  | chr15 | 43701129/C//T  | nonsynonymous | 1 | 0 |
| DMXL2    | chr15 | 51772760/A//C  | nonsynonymous | 1 | 0 |
| AQP9     | chr15 | 58467149/C//T  | synonymous    | 1 | 0 |
| AQP9     | chr15 | 58467221/G//A  | nonsynonymous | 1 | 0 |
| TLN2     | chr15 | 63111820/G//A  | nonsynonymous | 1 | 0 |
| THAP10   | chr15 | 71184397/T//G  | nonsynonymous | 1 | 0 |
| HYKK     | chr15 | 78825590/A//C  | nonsynonymous | 1 | 0 |
| SRRM2    | chr16 | 2813049/T//G   | synonymous    | 1 | 0 |
| ZNF597   | chr16 | 3486869/A//C   | nonsynonymous | 1 | 0 |
| NLRC3    | chr16 | 3613358/G//A   | nonsynonymous | 1 | 0 |
| TMEM114  | chr16 | 8619840/C//T   | nonsynonymous | 1 | 0 |
| PMM2     | chr16 | 8900241/G//A   | synonymous    | 1 | 0 |
| MYH11    | chr16 | 15818194/A//G  | nonsynonymous | 1 | 0 |
| CNGB1    | chr16 | 57993918/G//C  | nonsynonymous | 1 | 0 |
| CDYL2    | chr16 | 80646565/G//T  | synonymous    | 1 | 0 |
| CENPBD1  | chr16 | 90037903/A//G  | nonsynonymous | 1 | 0 |
| NLRP1    | chr17 | 5442808/T//C   | nonsynonymous | 1 | 0 |
| KIAA0753 | chr17 | 6531639/T//G   | nonsynonymous | 1 | 0 |
| DNAH2    | chr17 | 7733994/A//C   | nonsynonymous | 1 | 0 |
| ALOX15B  | chr17 | 7948594/T//A   | synonymous    | 1 | 0 |
| SLC47A1  | chr17 | 19459356/T//C  | nonsynonymous | 1 | 0 |
| GAS2L2   | chr17 | 34073407/G//A  | nonsynonymous | 1 | 0 |
| TAF15    | chr17 | 34163131/C//T  | synonymous    | 1 | 0 |
| PCGF2    | chr17 | 36894799/C//T  | nonsynonymous | 1 | 0 |
| TUBG2    | chr17 | 40818167/C//T  | synonymous    | 1 | 0 |
| SCRN2    | chr17 | 45916189/T//A  | nonsynonymous | 1 | 0 |
| MRPS23   | chr17 | 55917131/G//A  | synonymous    | 1 | 0 |
| SDK2     | chr17 | 71361417/T//C  | nonsynonymous | 1 | 0 |
| SDK2     | chr17 | 71398180/T//C  | nonsynonymous | 1 | 0 |
| ITGB4    | chr17 | 73752532/C//T  | synonymous    | 1 | 0 |
| JMJD6    | chr17 | 74716544/G//A  | synonymous    | 1 | 0 |
| DNAH17   | chr17 | 76437252/T//C  | nonsynonymous | 1 | 0 |
| RIOK3    | chr18 | 21059315/G//A  | nonsynonymous | 1 | 0 |
| SLC39A6  | chr18 | 33702226/G//A  | nonsynonymous | 1 | 0 |
| ATP8B1   | chr18 | 55319947/T//G  | nonsynonymous | 1 | 0 |
| ZNF516   | chr18 | 74092087/A//G  | synonymous    | 1 | 0 |
| C2CD4C   | chr19 | 408054/A//G    | nonsynonymous | 1 | 0 |
| ZFR2     | chr19 | 3816721/G//A   | nonsynonymous | 1 | 0 |
| PLIN4    | chr19 | 4510758/T//C   | nonsynonymous | 1 | 0 |
| KLHL26   | chr19 | 18780067/C//T  | synonymous    | 1 | 0 |
| ZNF85    | chr19 | 21132486/A//C  | nonsynonymous | 1 | 0 |
| ZNF790   | chr19 | 37310758/A//C  | nonsynonymous | 1 | 0 |
| SARS2    | chr19 | 39421431/T//G  | synonymous    | 1 | 0 |
| ZNF226   | chr19 | 44681724/T//G  | nonsynonymous | 1 | 0 |
| FBXO46   | chr19 | 46215501/C//T  | nonsynonymous | 1 | 0 |
| IGFL1    | chr19 | 46734121/T//C  | synonymous    | 1 | 0 |
| SULT2A1  | chr19 | 48385457/A//G  | nonsynonymous | 1 | 0 |

|            |       |                |               |   |   |
|------------|-------|----------------|---------------|---|---|
| KLK6       | chr19 | 51466699/T//A  | nonsynonymous | 1 | 0 |
| ZNF577     | chr19 | 52376939/T//G  | synonymous    | 1 | 0 |
| ZNF701     | chr19 | 53085669/G//A  | synonymous    | 1 | 0 |
| LILRB4     | chr19 | 55179530/G//T  | synonymous    | 1 | 0 |
| NLRP2      | chr19 | 55497535/C//T  | nonsynonymous | 1 | 0 |
| PPP1R12C   | chr19 | 55606841/G//T  | nonsynonymous | 1 | 0 |
| IL11       | chr19 | 55880193/T//C  | nonsynonymous | 1 | 0 |
| SLC27A5    | chr19 | 59012697/G//A  | synonymous    | 1 | 0 |
| TRMT6      | chr20 | 5927078/T//C   | nonsynonymous | 1 | 0 |
| BFSP1      | chr20 | 17474896/G//A  | synonymous    | 1 | 0 |
| INSM1      | chr20 | 20350274/G//A  | nonsynonymous | 1 | 0 |
| RALGAPA2   | chr20 | 20621440/A//C  | nonsynonymous | 1 | 0 |
| CNBD2      | chr20 | 34563889/G//A  | nonsynonymous | 1 | 0 |
| CHD6       | chr20 | 40122261/T//A  | nonsynonymous | 1 | 0 |
| TTPAL      | chr20 | 43113046/T//C  | nonsynonymous | 1 | 0 |
| DBNDD2     | chr20 | 44035149/G//A  | nonsynonymous | 1 | 0 |
| WFDC8      | chr20 | 44184438/T//G  | nonsynonymous | 1 | 0 |
| MMP9       | chr20 | 44639224/C//T  | synonymous    | 1 | 0 |
| SULF2      | chr20 | 46318989/C//T  | synonymous    | 1 | 0 |
| KCNG1      | chr20 | 49626158/T//C  | nonsynonymous | 1 | 0 |
| CDH26      | chr20 | 58562546/C//A  | synonymous    | 1 | 0 |
| LIME1      | chr20 | 62368882/C//T  | synonymous    | 1 | 0 |
| NCAM2      | chr21 | 22746201/G//A  | nonsynonymous | 1 | 0 |
| USP16      | chr21 | 30422481/T//G  | nonsynonymous | 1 | 0 |
| KRTAP8-1   | chr21 | 32185373/T//C  | nonsynonymous | 1 | 0 |
| TTC3-AS1   | chr21 | 38560729/T//G  | synonymous    | 1 | 0 |
| ICOSLG     | chr21 | 45655425/C//T  | nonsynonymous | 1 | 0 |
| THOC5      | chr22 | 29914991/T//G  | synonymous    | 1 | 0 |
| PES1       | chr22 | 30987801/T//G  | nonsynonymous | 1 | 0 |
| OSBP2      | chr22 | 31266438/G//A  | synonymous    | 1 | 0 |
| APOL6      | chr22 | 36054828/A//G  | nonsynonymous | 1 | 0 |
| CBX6       | chr22 | 39267500/T//G  | nonsynonymous | 1 | 0 |
| FAM47B     | chrX  | 34962126/G//A  | nonsynonymous | 1 | 0 |
| RGN        | chrX  | 46940685/C//A  | nonsynonymous | 1 | 0 |
| PCSK1N     | chrX  | 48690711/T//C  | nonsynonymous | 1 | 0 |
| BMP15      | chrX  | 50658994/T//G  | nonsynonymous | 1 | 0 |
| PABPC5     | chrX  | 90690938/C//T  | nonsynonymous | 1 | 0 |
| TEX13B     | chrX  | 107224403/G//T | synonymous    | 1 | 0 |
| CHRD1      | chrX  | 109919473/T//G | nonsynonymous | 1 | 0 |
| LHFPL1     | chrX  | 111874465/T//G | synonymous    | 1 | 0 |
| RAB33A     | chrX  | 129318486/C//T | synonymous    | 1 | 0 |
| ARHGAP36   | chrX  | 130219957/A//T | nonsynonymous | 1 | 0 |
| MAGEA1     | chrX  | 152482536/C//T | nonsynonymous | 1 | 0 |
| C1QC       | chr1  | 22974270/C//A  | synonymous    | 1 | 0 |
| GSTM1      | chr1  | 110235893/G//A | synonymous    | 1 | 0 |
| LRRRC71    | chr1  | 156902322/G//T | synonymous    | 1 | 0 |
| FCRL3      | chr1  | 157650789/C//A | nonsynonymous | 1 | 0 |
| CADM3      | chr1  | 159166723/C//G | synonymous    | 1 | 0 |
| PPOX       | chr1  | 161140567/G//A | synonymous    | 1 | 0 |
| ADCY10     | chr1  | 167874258/C//A | nonsynonymous | 1 | 0 |
| DARS2      | chr1  | 173808617/C//A | nonsynonymous | 1 | 0 |
| CACNA1E    | chr1  | 181724484/A//T | nonsynonymous | 1 | 0 |
| RYR2       | chr1  | 237619975/G//C | nonsynonymous | 1 | 0 |
| RYR2       | chr1  | 237831224/G//T | nonsynonymous | 1 | 0 |
| ZBTB18     | chr1  | 244218403/G//T | nonsynonymous | 1 | 0 |
| OR2W5      | chr1  | 247655051/C//A | nonsynonymous | 1 | 0 |
| OR11L1     | chr1  | 248004763/C//A | nonsynonymous | 1 | 0 |
| MAT2A      | chr2  | 85769400/G//A  | synonymous    | 1 | 0 |
| LY75-CD302 | chr2  | 160741801/C//G | nonsynonymous | 1 | 0 |
| GPR155     | chr2  | 175337730/C//T | nonsynonymous | 1 | 0 |
| ABCA12     | chr2  | 215917261/A//T | nonsynonymous | 1 | 0 |
| ABCA12     | chr2  | 215917263/G//T | nonsynonymous | 1 | 0 |
| EIF4G1     | chr3  | 184039328/C//T | nonsynonymous | 1 | 0 |
| FRYL       | chr4  | 48567639/C//G  | nonsynonymous | 1 | 0 |
| FRYL       | chr4  | 48567647/G//A  | synonymous    | 1 | 0 |
| SEMA5A     | chr5  | 9066732/C//A   | synonymous    | 1 | 0 |
| IGFBP3     | chr7  | 45956183/G//T  | synonymous    | 1 | 0 |
| POLR2J     | chr7  | 102119347/G//A | synonymous    | 1 | 0 |
| ZNF596     | chr8  | 193783/A//G    | synonymous    | 1 | 0 |
| DENND3     | chr8  | 142151419/T//C | nonsynonymous | 1 | 0 |

|          |       |                   |               |   |   |
|----------|-------|-------------------|---------------|---|---|
| SFXN2    | chr10 | 104491523/G//C    | nonsynonymous | 1 | 0 |
| KCNH5    | chr14 | 63447928/T//C     | nonsynonymous | 1 | 0 |
| AREL1    | chr14 | 75151298/C//G     | nonsynonymous | 1 | 0 |
| CHTF18   | chr16 | 845128/G//C       | synonymous    | 1 | 0 |
| ZNF75A   | chr16 | 3367315/A//G      | nonsynonymous | 1 | 0 |
| NDE1     | chr16 | 15771723/G//A     | synonymous    | 1 | 0 |
| KDM8     | chr16 | 27221820/G//T     | nonsynonymous | 1 | 0 |
| ASPHD1   | chr16 | 29917172/G//T     | nonsynonymous | 1 | 0 |
| HYDIN    | chr16 | 70884466/G//C     | nonsynonymous | 1 | 0 |
| FOXL1    | chr16 | 86612256/C//A     | synonymous    | 1 | 0 |
| CCDC47   | chr17 | 61824197/C//G     | synonymous    | 1 | 0 |
| USH1G    | chr17 | 72919028/C//A     | synonymous    | 1 | 0 |
| KHSRP    | chr19 | 6415670/G//C      | nonsynonymous | 1 | 0 |
| CC2D1A   | chr19 | 14038711/G//C     | synonymous    | 1 | 0 |
| ZNF85    | chr19 | 21132175/C//T     | synonymous    | 1 | 0 |
| BPIFC    | chr22 | 32813103/AATGG//A | nonsynonymous | 1 | 0 |
| MSL3     | chrX  | 11790811/G//T     | nonsynonymous | 1 | 0 |
| MAGEB2   | chrX  | 30237457/C//G     | nonsynonymous | 1 | 0 |
| LHFPL1   | chrX  | 111874810/C//A    | nonsynonymous | 1 | 0 |
| CSAG1    | chrX  | 151904489/C//A    | synonymous    | 1 | 0 |
| LIN28A   | chr1  | 26737351/G//C     | synonymous    | 0 | 1 |
| TRPA1    | chr8  | 72981375/G//T     | nonsynonymous | 0 | 1 |
| VDAC2    | chr10 | 76973835/G//C     | synonymous    | 0 | 1 |
| KRTAP5-9 | chr11 | 71259676/C//T     | synonymous    | 0 | 1 |
| PTPRM    | chr18 | 8387120/G//A      | synonymous    | 0 | 1 |
| MFS12    | chr19 | 3548214/G//C      | synonymous    | 0 | 1 |
| CACNA1A  | chr19 | 13470535/T//C     | nonsynonymous | 0 | 1 |
| ZNF335   | chr20 | 44594349/G//C     | synonymous    | 0 | 1 |
| LRRIQ3   | chr1  | 74507578/T//C     | nonsynonymous | 0 | 1 |
| OR10R2   | chr1  | 158450142/C//T    | nonsynonymous | 0 | 1 |
| NBAS     | chr2  | 15514798/C//T     | nonsynonymous | 0 | 1 |
| ZFP36L2  | chr2  | 43453448/T//C     | nonsynonymous | 0 | 1 |
| STEAP3   | chr2  | 120005382/G//A    | nonsynonymous | 0 | 1 |
| ALCAM    | chr3  | 105266240/C//A    | nonsynonymous | 0 | 1 |
| DNAJC13  | chr3  | 132235592/C//A    | nonsynonymous | 0 | 1 |
| LDB2     | chr4  | 16760830/G//A     | synonymous    | 0 | 1 |
| DNAH5    | chr5  | 13824421/G//A     | nonsynonymous | 0 | 1 |
| TUSC3    | chr8  | 15480637/C//T     | nonsynonymous | 0 | 1 |
| HGSNAT   | chr8  | 43054688/AAAG//A  | nonsynonymous | 0 | 1 |
| ADARB2   | chr10 | 1245965/C//T      | nonsynonymous | 0 | 1 |
| REP15    | chr12 | 27849621/A//G     | synonymous    | 0 | 1 |
| PDZRN4   | chr12 | 41966716/C//G     | nonsynonymous | 0 | 1 |
| KRT5     | chr12 | 52910513/C//A     | synonymous    | 0 | 1 |
| CALCOCO1 | chr12 | 54108408/T//C     | nonsynonymous | 0 | 1 |
| GCN1     | chr12 | 120587792/C//T    | synonymous    | 0 | 1 |
| ATP6V0A2 | chr12 | 124228862/C//T    | nonsynonymous | 0 | 1 |
| TMEM132C | chr12 | 128899980/G//A    | synonymous    | 0 | 1 |
| EP400    | chr12 | 132490745/C//T    | synonymous    | 0 | 1 |
| PAPD5    | chr16 | 50251527/G//A     | nonsynonymous | 0 | 1 |
| ADCYAP1  | chr18 | 908344/G//A       | synonymous    | 0 | 1 |
| ZIC3     | chrX  | 136649891/C//A    | synonymous    | 0 | 1 |
| MAP3K6   | chr1  | 27690535/G//A     | nonsynonymous | 1 | 0 |
| KPNA6    | chr1  | 32620212/G//T     | nonsynonymous | 1 | 0 |
| DMBX1    | chr1  | 46976778/G//A     | nonsynonymous | 1 | 0 |
| HRNR     | chr1  | 152191848/C//A    | nonsynonymous | 1 | 0 |
| SLC27A3  | chr1  | 153750309/C//T    | nonsynonymous | 1 | 0 |
| DCST1    | chr1  | 155007173/CAGA//C | nonsynonymous | 1 | 0 |
| SMG5     | chr1  | 156235701/G//A    | nonsynonymous | 1 | 0 |
|          | chr1  | 182775597/C//T    | synonymous    | 1 | 0 |
| ASPM     | chr1  | 197115463/G//A    | synonymous    | 1 | 0 |
| CTSE     | chr1  | 206331215/C//T    | nonsynonymous | 1 | 0 |
| USH2A    | chr1  | 216497016/G//C    | synonymous    | 1 | 0 |
| OBSCN    | chr1  | 228404405/T//A    | nonsynonymous | 1 | 0 |
| DISC1    | chr1  | 231830151/C//T    | nonsynonymous | 1 | 0 |
| PCNX2    | chr1  | 233363026/C//T    | nonsynonymous | 1 | 0 |
| OR2M2    | chr1  | 248343299/G//A    | synonymous    | 1 | 0 |
| ADCY3    | chr2  | 25057656/C//T     | synonymous    | 1 | 0 |
| KCNK3    | chr2  | 26951326/C//T     | nonsynonymous | 1 | 0 |
| CHAC2    | chr2  | 54001675/A//C     | synonymous    | 1 | 0 |
| RFX8     | chr2  | 102029503/G//A    | nonsynonymous | 1 | 0 |

|          |       |                      |               |   |   |
|----------|-------|----------------------|---------------|---|---|
| ORC2     | chr2  | 201796156/A//T       | nonsynonymous | 1 | 0 |
| FZD7     | chr2  | 202900122/G//A       | nonsynonymous | 1 | 0 |
| NRP2     | chr2  | 206608199/C//T       | nonsynonymous | 1 | 0 |
| DNER     | chr2  | 230453149/C//T       | nonsynonymous | 1 | 0 |
| COL6A3   | chr2  | 238280774/G//A       | nonsynonymous | 1 | 0 |
| MLH1     | chr3  | 37092014/G//A        | nonsynonymous | 1 | 0 |
| KLHL40   | chr3  | 42727780/G//A        | nonsynonymous | 1 | 0 |
| SCAP     | chr3  | 47456081/G//A        | nonsynonymous | 1 | 0 |
| DOCK3    | chr3  | 51367632/T//A        | nonsynonymous | 1 | 0 |
| STAB1    | chr3  | 52555658/C//T        | synonymous    | 1 | 0 |
| ROBO1    | chr3  | 78987805/C//A        | nonsynonymous | 1 | 0 |
| SENP7    | chr3  | 101117864/G//A       | nonsynonymous | 1 | 0 |
| NFKBIZ   | chr3  | 101576208/C//T       | nonsynonymous | 1 | 0 |
| PLXND1   | chr3  | 129324809/C//T       | nonsynonymous | 1 | 0 |
| PLS1     | chr3  | 142395004/G//C       | nonsynonymous | 1 | 0 |
| GPR171   | chr3  | 150917221/A//T       | synonymous    | 1 | 0 |
| IGSF10   | chr3  | 151164666/T//C       | nonsynonymous | 1 | 0 |
| PCDH7    | chr4  | 30723062/C//A        | synonymous    | 1 | 0 |
| PPP3CA   | chr4  | 101947109/G//A       | synonymous    | 1 | 0 |
| ANK2     | chr4  | 114257148/G//A       | nonsynonymous | 1 | 0 |
| SYNPO2   | chr4  | 119952612/G//T       | nonsynonymous | 1 | 0 |
|          | chr4  | 122103898/G//A       | synonymous    | 1 | 0 |
| SLC45A2  | chr5  | 33944808/G//A        | nonsynonymous | 1 | 0 |
| OXCT1    | chr5  | 41862853/C//T        | nonsynonymous | 1 | 0 |
| MAST4    | chr5  | 66459542/G//A        | nonsynonymous | 1 | 0 |
| ADGRV1   | chr5  | 89938502/C//T        | synonymous    | 1 | 0 |
| GPLD1    | chr6  | 24448431/G//A        | synonymous    | 1 | 0 |
| UNC5CL   | chr6  | 40998408/C//T        | synonymous    | 1 | 0 |
| TMEM151B | chr6  | 44243538/G//A        | synonymous    | 1 | 0 |
| KHDRBS2  | chr6  | 62995819/G//A        | nonsynonymous | 1 | 0 |
| RIMS1    | chr6  | 73110409/G//A        | nonsynonymous | 1 | 0 |
| FAM46A   | chr6  | 82461740/C//T        | nonsynonymous | 1 | 0 |
| CD164    | chr6  | 109703584/T//G       | synonymous    | 1 | 0 |
| RPF2     | chr6  | 111306282/G//A       | nonsynonymous | 1 | 0 |
| FRK      | chr6  | 116381344/C//T       | nonsynonymous | 1 | 0 |
| C6orf58  | chr6  | 127899823/T//G       | synonymous    | 1 | 0 |
| SLC2A12  | chr6  | 134349932/T//C       | nonsynonymous | 1 | 0 |
| FBXO30   | chr6  | 146125797/C//T       | nonsynonymous | 1 | 0 |
| NPC1L1   | chr7  | 44579949/G//A        | synonymous    | 1 | 0 |
| RELN     | chr7  | 103389945/A//G       | nonsynonymous | 1 | 0 |
| LHFPL3   | chr7  | 104377280/A//T       | nonsynonymous | 1 | 0 |
| PRSS1    | chr7  | 142459785/G//A       | nonsynonymous | 1 | 0 |
| DLC1     | chr8  | 13357342/T//C        | nonsynonymous | 1 | 0 |
| NEFM     | chr8  | 24771385/G//A        | nonsynonymous | 1 | 0 |
| ADAM9    | chr8  | 38934808/G//A        | nonsynonymous | 1 | 0 |
| CHD7     | chr8  | 61748802/C//T        | nonsynonymous | 1 | 0 |
| CNBD1    | chr8  | 88298763/T//A        | synonymous    | 1 | 0 |
| KIAA1429 | chr8  | 95518786/A//G        | nonsynonymous | 1 | 0 |
| UBR5     | chr8  | 103310700/G//A       | nonsynonymous | 1 | 0 |
| ARC      | chr8  | 143694892/G//A       | synonymous    | 1 | 0 |
| CCDC166  | chr8  | 144790006/C//T       | nonsynonymous | 1 | 0 |
| SCRT1    | chr8  | 145557658/G//A       | nonsynonymous | 1 | 0 |
| KIAA1161 | chr9  | 34371539/C//T        | nonsynonymous | 1 | 0 |
| TLN1     | chr9  | 35704085/G//A        | nonsynonymous | 1 | 0 |
| ITGA8    | chr10 | 15648327/T//G        | nonsynonymous | 1 | 0 |
|          | chr10 | 21462794/G//T        | synonymous    | 1 | 0 |
| KIAA1462 | chr10 | 30315575/G//A        | nonsynonymous | 1 | 0 |
| SIRT1    | chr10 | 69676110/T//C        | synonymous    | 1 | 0 |
| SRGN     | chr10 | 70863861/G//T        | nonsynonymous | 1 | 0 |
| TLL2     | chr10 | 98155015/T//C        | nonsynonymous | 1 | 0 |
| TLL2     | chr10 | 98180733/G//A        | synonymous    | 1 | 0 |
| PKD2L1   | chr10 | 102054363/C//T       | nonsynonymous | 1 | 0 |
| VWA2     | chr10 | 116032663/CTG//C     | nonsynonymous | 1 | 0 |
| SHTN1    | chr10 | 118645924/G//A       | synonymous    | 1 | 0 |
| MKI67    | chr10 | 129906957/C//T       | synonymous    | 1 | 0 |
| MUC5B    | chr11 | 1261106/T//C         | nonsynonymous | 1 | 0 |
| RASGRP2  | chr11 | 64508433/C//T        | nonsynonymous | 1 | 0 |
| ATF7IP   | chr12 | 14613698/CCATCTGG//C | nonsynonymous | 1 | 0 |
| CNTN1    | chr12 | 41414150/G//A        | nonsynonymous | 1 | 0 |
| MARS     | chr12 | 57892216/C//T        | nonsynonymous | 1 | 0 |

|           |       |                    |               |   |   |
|-----------|-------|--------------------|---------------|---|---|
| OTOGL     | chr12 | 80722869/C//T      | nonsynonymous | 1 | 0 |
| VEZT      | chr12 | 95645777/C//G      | nonsynonymous | 1 | 0 |
| ACACB     | chr12 | 109703292/G//A     | synonymous    | 1 | 0 |
| MTMR6     | chr13 | 25831889/T//A      | synonymous    | 1 | 0 |
| FRY       | chr13 | 32745389/C//T      | synonymous    | 1 | 0 |
| FRY       | chr13 | 32745391/A//T      | nonsynonymous | 1 | 0 |
| NRXN3     | chr14 | 79175719/C//T      | nonsynonymous | 1 | 0 |
| SECISBP2L | chr15 | 49329905/A//C      | nonsynonymous | 1 | 0 |
| ZNF609    | chr15 | 64966371/C//T      | nonsynonymous | 1 | 0 |
| RHBDF1    | chr16 | 112593/G//A        | nonsynonymous | 1 | 0 |
| TELO2     | chr16 | 1547388/C//T       | nonsynonymous | 1 | 0 |
| BICDL2    | chr16 | 3085444/G//T       | synonymous    | 1 | 0 |
| LOC81691  | chr16 | 20838444/C//T      | nonsynonymous | 1 | 0 |
| CORO1A    | chr16 | 30198730/C//T      | nonsynonymous | 1 | 0 |
| DCTPP1    | chr16 | 30435691/G//T      | synonymous    | 1 | 0 |
| ALOX12    | chr17 | 6900337/G//A       | nonsynonymous | 1 | 0 |
| SLC46A1   | chr17 | 26732283/G//A      | synonymous    | 1 | 0 |
| ARHGAP27  | chr17 | 43473163/C//T      | synonymous    | 1 | 0 |
| LOXHD1    | chr18 | 44181306/G//A      | synonymous    | 1 | 0 |
| CSNK1G2   | chr19 | 1980366/C//T       | synonymous    | 1 | 0 |
| RGL3      | chr19 | 11508124/G//T      | synonymous    | 1 | 0 |
| RTBDN     | chr19 | 12936599/C//T      | nonsynonymous | 1 | 0 |
| MAU2      | chr19 | 19453581/C//T      | synonymous    | 1 | 0 |
| ZNF676    | chr19 | 22363448/A//T      | synonymous    | 1 | 0 |
| KCTD15    | chr19 | 34292194/C//T      | synonymous    | 1 | 0 |
| SIPA1L3   | chr19 | 38696757/G//A      | synonymous    | 1 | 0 |
| LGALS4    | chr19 | 39299421/A//G      | nonsynonymous | 1 | 0 |
| ZFP36     | chr19 | 39899240/T//C      | synonymous    | 1 | 0 |
| TGFB1     | chr19 | 41850657/C//T      | nonsynonymous | 1 | 0 |
| SYMPK     | chr19 | 46351096/C//T      | nonsynonymous | 1 | 0 |
| PPP1R15A  | chr19 | 49377112/A//G      | nonsynonymous | 1 | 0 |
| IL411     | chr19 | 50394668/C//T      | synonymous    | 1 | 0 |
| ADNP      | chr20 | 49509223/G//A      | synonymous    | 1 | 0 |
| TCEA2     | chr20 | 62701931/G//A      | synonymous    | 1 | 0 |
| TXNRD2    | chr22 | 19867719/C//T      | nonsynonymous | 1 | 0 |
| RHBDD3    | chr22 | 29659912/C//A      | synonymous    | 1 | 0 |
| CARD10    | chr22 | 37887405/C//T      | nonsynonymous | 1 | 0 |
| PLA2G6    | chr22 | 38512196/A//G      | nonsynonymous | 1 | 0 |
| MKL1      | chr22 | 40814523/A//G      | nonsynonymous | 1 | 0 |
| CYB5R3    | chr22 | 43023685/G//A      | nonsynonymous | 1 | 0 |
| CSF2RA    | chrX  | 1413250/G//A       | nonsynonymous | 1 | 0 |
| AKAP17A   | chrX  | 1719668/C//T       | synonymous    | 1 | 0 |
| ELK1      | chrX  | 47497393/G//A      | synonymous    | 1 | 0 |
| AMER1     | chrX  | 63411798/G//A      | nonsynonymous | 1 | 0 |
| ZC3H12B   | chrX  | 64722262/A//G      | nonsynonymous | 1 | 0 |
|           | chrX  | 65242605/T//G      | synonymous    | 1 | 0 |
| TGIF2LX   | chrX  | 89177810/A//C      | nonsynonymous | 1 | 0 |
| IL1RAPL2  | chrX  | 104440380/G//A     | nonsynonymous | 1 | 0 |
| RIPPLY1   | chrX  | 106144031/T//C     | nonsynonymous | 1 | 0 |
| TEX13C    | chrX  | 124454244/G//A     | nonsynonymous | 1 | 0 |
| IGSF1     | chrX  | 130410108/T//G     | nonsynonymous | 1 | 0 |
| FGF13     | chrX  | 137715110/C//T     | synonymous    | 1 | 0 |
| ATP11C    | chrX  | 138845544/G//T     | nonsynonymous | 1 | 0 |
| SSR4      | chrX  | 153060020/C//T     | synonymous    | 1 | 0 |
| SPOCD1    | chr1  | 32258877/A//T      | nonsynonymous | 1 | 0 |
| MACF1     | chr1  | 39913742/A//C      | nonsynonymous | 1 | 0 |
| WLS       | chr1  | 68591905/C//CCTCCT | synonymous    | 1 | 0 |
| SWT1      | chr1  | 185151113/G//A     | synonymous    | 1 | 0 |
| SWT1      | chr1  | 185240469/A//T     | nonsynonymous | 1 | 0 |
| PLA2G4A   | chr1  | 186916083/G//A     | synonymous    | 1 | 0 |
| LYPLAL1   | chr1  | 219366572/A//C     | nonsynonymous | 1 | 0 |
| RYR2      | chr1  | 237693773/G//A     | nonsynonymous | 1 | 0 |
| TMEM178A  | chr2  | 39944209/C//T      | nonsynonymous | 1 | 0 |
| SMYD1     | chr2  | 88402588/A//T      | nonsynonymous | 1 | 0 |
| FABP1     | chr2  | 88427580/C//A      | synonymous    | 1 | 0 |
| ADRA2B    | chr2  | 96781763/C//T      | synonymous    | 1 | 0 |
| TFCP2L1   | chr2  | 121991681/T//C     | nonsynonymous | 1 | 0 |
| R3HDM1    | chr2  | 136467790/A//C     | nonsynonymous | 1 | 0 |
| KIF5C     | chr2  | 149864549/A//T     | nonsynonymous | 1 | 0 |
| GALNT5    | chr2  | 158115048/G//A     | nonsynonymous | 1 | 0 |

|          |       |                        |               |   |   |
|----------|-------|------------------------|---------------|---|---|
| KCNH7    | chr2  | 163228456/T//G         | nonsynonymous | 1 | 0 |
| SPEG     | chr2  | 220342687/C//T         | synonymous    | 1 | 0 |
| TRIP12   | chr2  | 230723907/G//T         | nonsynonymous | 1 | 0 |
| KIAA1143 | chr3  | 44802993/C//G          | nonsynonymous | 1 | 0 |
| SETD2    | chr3  | 47098913/G//A          | nonsynonymous | 1 | 0 |
| GPR62    | chr3  | 51990578/C//T          | nonsynonymous | 1 | 0 |
| OR5K4    | chr3  | 98073061/C//T          | nonsynonymous | 1 | 0 |
| PLXNA1   | chr3  | 126749203/G//T         | nonsynonymous | 1 | 0 |
| CPNE4    | chr3  | 131261462/G//T         | nonsynonymous | 1 | 0 |
| MED12L   | chr3  | 150883738/T//A         | nonsynonymous | 1 | 0 |
| SMCO1    | chr3  | 196234948/T//C         | nonsynonymous | 1 | 0 |
| FAM193A  | chr4  | 2701815/A//T           | nonsynonymous | 1 | 0 |
| NSG1     | chr4  | 4418973/C//T           | synonymous    | 1 | 0 |
| N4BP2    | chr4  | 40121965/T//G          | nonsynonymous | 1 | 0 |
| MTPP     | chr4  | 100496001/T//A         | synonymous    | 1 | 0 |
| FHDC1    | chr4  | 153896911/A//G         | nonsynonymous | 1 | 0 |
| MTNR1A   | chr4  | 187455633/A//G         | nonsynonymous | 1 | 0 |
| IL7R     | chr5  | 35873736/T//G          | nonsynonymous | 1 | 0 |
| SREK1    | chr5  | 65458311/G//A          | nonsynonymous | 1 | 0 |
| VCAN     | chr5  | 82816528/A//G          | synonymous    | 1 | 0 |
| IL13     | chr5  | 131993869/C//T         | synonymous    | 1 | 0 |
| PCDHAC1  | chr5  | 140307087/A//G         | nonsynonymous | 1 | 0 |
| CYFIP2   | chr5  | 156742108/T//C         | synonymous    | 1 | 0 |
| CAGE1    | chr6  | 7387208/A//G           | synonymous    | 1 | 0 |
| OR10C1   | chr6  | 29408515/C//T          | synonymous    | 1 | 0 |
| PPP1R10  | chr6  | 30569403/T//A          | nonsynonymous | 1 | 0 |
| ADGRB3   | chr6  | 69653736/G//A          | nonsynonymous | 1 | 0 |
| KCNQ5    | chr6  | 73904449/C//T          | nonsynonymous | 1 | 0 |
| SASH1    | chr6  | 148711287/C//G         | nonsynonymous | 1 | 0 |
| PDE1C    | chr7  | 31913008/C//T          | nonsynonymous | 1 | 0 |
| ZPBP     | chr7  | 50022971/C//T          | nonsynonymous | 1 | 0 |
| HTRA4    | chr8  | 38834250/G//C          | nonsynonymous | 1 | 0 |
| PENK     | chr8  | 57358471/G//A          | synonymous    | 1 | 0 |
| RBM12B   | chr8  | 94747664/T//C          | synonymous    | 1 | 0 |
| SDC2     | chr8  | 97620641/A//G          | nonsynonymous | 1 | 0 |
| MTBP     | chr8  | 121458666/T//G         | synonymous    | 1 | 0 |
| NDRG1    | chr8  | 134292489/C//A         | nonsynonymous | 1 | 0 |
| RFX3     | chr9  | 3262966/T//A           | nonsynonymous | 1 | 0 |
| VCP      | chr9  | 21994138/C//T          | synonymous    | 1 | 0 |
| NTRK2    | chr9  | 35066793/C//A          | synonymous    | 1 | 0 |
| NTRK2    | chr9  | 87563472/T//A          | nonsynonymous | 1 | 0 |
| ZNF782   | chr9  | 99581918/A//G          | synonymous    | 1 | 0 |
| C9orf84  | chr9  | 114490159/G//A         | nonsynonymous | 1 | 0 |
| HERC4    | chr10 | 69785324/A//T          | nonsynonymous | 1 | 0 |
| MUC6     | chr11 | 1015931/C//G           | synonymous    | 1 | 0 |
| SYT13    | chr11 | 45307594/C//A          | nonsynonymous | 1 | 0 |
| RNASEH2C | chr11 | 65486735/A//C          | synonymous    | 1 | 0 |
| TMTC1    | chr12 | 29709864/C//G          | nonsynonymous | 1 | 0 |
| RAPGEF3  | chr12 | 48143552/C//T          | nonsynonymous | 1 | 0 |
| KRT6B    | chr12 | 52842665/G//C          | nonsynonymous | 1 | 0 |
| OR6C2    | chr12 | 55846002/A//C          | nonsynonymous | 1 | 0 |
| PPFIA2   | chr12 | 81675223/C//A          | nonsynonymous | 1 | 0 |
| MLNR     | chr13 | 49795287/C//T          | nonsynonymous | 1 | 0 |
| PCDH20   | chr13 | 61986963/G//A          | synonymous    | 1 | 0 |
| FBXL3    | chr13 | 77581404/GA//G         | nonsynonymous | 1 | 0 |
| C14orf28 | chr14 | 45369698/A//G          | synonymous    | 1 | 0 |
| ARID4A   | chr14 | 58817925/A//G          | synonymous    | 1 | 0 |
| DYNC1H1  | chr14 | 102500720/GGCAGGCCA//G | nonsynonymous | 1 | 0 |
| AHNAK2   | chr14 | 105418765/A//C         | nonsynonymous | 1 | 0 |
| GALK2    | chr15 | 49620332/G//A          | synonymous    | 1 | 0 |
| ABHD17C  | chr15 | 81046805/C//T          | synonymous    | 1 | 0 |
| CACNA1H  | chr16 | 1255202/G//A           | nonsynonymous | 1 | 0 |
| CACNA1H  | chr16 | 7743333/G//T           | synonymous    | 1 | 0 |
| TNRC6A   | chr16 | 24802056/T//G          | nonsynonymous | 1 | 0 |
| ZNF668   | chr16 | 31075771/C//A          | nonsynonymous | 1 | 0 |
| BRD7     | chr16 | 50354641/T//G          | nonsynonymous | 1 | 0 |
| HOXB3    | chr17 | 46627978/C//A          | synonymous    | 1 | 0 |
| DCAF7    | chr17 | 61627962/C//G          | synonymous    | 1 | 0 |
| FN3KRP   | chr17 | 80674699/G//C          | nonsynonymous | 1 | 0 |
| NETO1    | chr18 | 70417644/G//A          | synonymous    | 1 | 0 |



|           |       |                |               |   |   |
|-----------|-------|----------------|---------------|---|---|
| WDR83     | chr19 | 12781614/C//T  | nonsynonymous | 1 | 0 |
| ZNF569    | chr19 | 37903571/G//A  | synonymous    | 1 | 0 |
| RASGRP4   | chr19 | 38916755/C//T  | synonymous    | 1 | 0 |
| FKRP      | chr19 | 47259744/C//G  | nonsynonymous | 1 | 0 |
| RUVBL2    | chr19 | 49510569/G//T  | nonsynonymous | 1 | 0 |
| VSIG10L   | chr19 | 51844525/C//A  | nonsynonymous | 1 | 0 |
| GINS1     | chr20 | 25397736/T//A  | synonymous    | 1 | 0 |
| E2F1      | chr20 | 32266007/C//T  | nonsynonymous | 1 | 0 |
| OSBPL2    | chr20 | 60854364/C//T  | nonsynonymous | 1 | 0 |
| NCAM2     | chr21 | 22746308/A//G  | synonymous    | 1 | 0 |
| IFNAR1    | chr21 | 34713414/A//G  | nonsynonymous | 1 | 0 |
| FANCB     | chrX  | 14871260/C//T  | synonymous    | 1 | 0 |
| BEND2     | chrX  | 18198725/T//C  | nonsynonymous | 1 | 0 |
| DCAF8L2   | chrX  | 27765619/C//T  | nonsynonymous | 1 | 0 |
| TENM1     | chrX  | 123517991/C//G | nonsynonymous | 1 | 0 |
| SRRM1     | chr1  | 24973166/G//C  | nonsynonymous | 1 | 0 |
| PHACTR4   | chr1  | 28793031/C//G  | nonsynonymous | 1 | 0 |
| TRNAU1AP  | chr1  | 28891255/G//A  | nonsynonymous | 1 | 0 |
| GRIK3     | chr1  | 37315930/G//C  | synonymous    | 1 | 0 |
| GRIK3     | chr1  | 37324849/C//T  | nonsynonymous | 1 | 0 |
| SLC6A9    | chr1  | 44474146/C//T  | nonsynonymous | 1 | 0 |
| PTGER3    | chr1  | 71512884/G//T  | nonsynonymous | 1 | 0 |
| GSTM4     | chr1  | 110203836/A//G | nonsynonymous | 1 | 0 |
| TNFAIP8L2 | chr1  | 151131185/C//T | synonymous    | 1 | 0 |
| SHC1      | chr1  | 154942861/G//A | nonsynonymous | 1 | 0 |
| IQGAP3    | chr1  | 156498731/C//T | synonymous    | 1 | 0 |
| CFAP45    | chr1  | 159847181/C//G | nonsynonymous | 1 | 0 |
| FCGR3B    | chr1  | 161601001/C//A | synonymous    | 1 | 0 |
| TEDDM1    | chr1  | 182369476/C//G | nonsynonymous | 1 | 0 |
| LGR6      | chr1  | 202287707/C//T | nonsynonymous | 1 | 0 |
| ACBD3     | chr1  | 226352573/G//A | synonymous    | 1 | 0 |
| OBSCN     | chr1  | 228401898/C//G | nonsynonymous | 1 | 0 |
| KIDINS220 | chr2  | 8877070/T//C   | synonymous    | 1 | 0 |
| GREB1     | chr2  | 11773008/A//C  | synonymous    | 1 | 0 |
| STON1     | chr2  | 48809445/A//G  | nonsynonymous | 1 | 0 |
| DYSF      | chr2  | 71816779/C//A  | nonsynonymous | 1 | 0 |
| EIF5B     | chr2  | 100013254/A//G | nonsynonymous | 1 | 0 |
| NCKAP5    | chr2  | 133540750/C//T | nonsynonymous | 1 | 0 |
| NCKAP5    | chr2  | 133541662/C//G | nonsynonymous | 1 | 0 |
| NCKAP5    | chr2  | 133541717/C//G | nonsynonymous | 1 | 0 |
| NOSTRIN   | chr2  | 169711966/G//C | nonsynonymous | 1 | 0 |
| GPR155    | chr2  | 175346504/T//C | nonsynonymous | 1 | 0 |
| ANKRD44   | chr2  | 198011781/C//T | nonsynonymous | 1 | 0 |
| MPP4      | chr2  | 202546280/C//G | nonsynonymous | 1 | 0 |
| IKZF2     | chr2  | 214012489/C//G | nonsynonymous | 1 | 0 |
| NYAP2     | chr2  | 226446806/G//A | nonsynonymous | 1 | 0 |
| DGKD      | chr2  | 234358003/C//T | synonymous    | 1 | 0 |
| TGFBR2    | chr3  | 30648460/C//T  | nonsynonymous | 1 | 0 |
| GLB1      | chr3  | 33058248/C//A  | nonsynonymous | 1 | 0 |
| SLC6A20   | chr3  | 45812753/G//C  | nonsynonymous | 1 | 0 |
| BAP1      | chr3  | 52438535/G//C  | nonsynonymous | 1 | 0 |
| MLF1      | chr3  | 158317802/G//A | nonsynonymous | 1 | 0 |
| MLF1      | chr3  | 158317826/G//A | nonsynonymous | 1 | 0 |
| KCNMB2    | chr3  | 178560503/C//T | synonymous    | 1 | 0 |
| GNB4      | chr3  | 179131510/T//C | nonsynonymous | 1 | 0 |
| HES1      | chr3  | 193854434/G//A | nonsynonymous | 1 | 0 |
| ZFYVE28   | chr4  | 2306215/C//T   | nonsynonymous | 1 | 0 |
| LYAR      | chr4  | 4276301/C//G   | nonsynonymous | 1 | 0 |
| MUC7      | chr4  | 71339777/G//A  | synonymous    | 1 | 0 |
| BMP2K     | chr4  | 79792148/G//A  | synonymous    | 1 | 0 |
| MEPE      | chr4  | 88767356/G//A  | nonsynonymous | 1 | 0 |
| MEPE      | chr4  | 88767581/G//A  | nonsynonymous | 1 | 0 |
| FBXW7     | chr4  | 153247366/C//G | nonsynonymous | 1 | 0 |
| FASTKD3   | chr5  | 7867559/A//G   | nonsynonymous | 1 | 0 |
| PRKAA1    | chr5  | 40762951/G//A  | nonsynonymous | 1 | 0 |
| CENPH     | chr5  | 68505608/G//C  | nonsynonymous | 1 | 0 |
| SLC22A4   | chr5  | 131630440/G//A | nonsynonymous | 1 | 0 |
| RXRβ      | chr6  | 33162601/G//A  | nonsynonymous | 1 | 0 |
| WDR46     | chr6  | 33254933/G//G  | nonsynonymous | 1 | 0 |
| C6orf1    | chr6  | 34214856/C//T  | synonymous    | 1 | 0 |

|               |       |                |               |   |   |
|---------------|-------|----------------|---------------|---|---|
| MTCH1         | chr6  | 36949389/G//A  | synonymous    | 1 | 0 |
| CAPN11        | chr6  | 44150963/A//G  | nonsynonymous | 1 | 0 |
| KHDRBS2       | chr6  | 62995888/G//C  | synonymous    | 1 | 0 |
| PHF3          | chr6  | 64413542/C//G  | synonymous    | 1 | 0 |
| PEX7          | chr6  | 137147517/C//T | synonymous    | 1 | 0 |
| HOXA2         | chr7  | 27141739/G//C  | synonymous    | 1 | 0 |
| TAX1BP1       | chr7  | 27831732/C//T  | synonymous    | 1 | 0 |
| PDE1C         | chr7  | 31793081/G//T  | nonsynonymous | 1 | 0 |
| NME8          | chr7  | 37934089/A//T  | nonsynonymous | 1 | 0 |
| POM121L12     | chr7  | 53104256/G//C  | synonymous    | 1 | 0 |
| PCLO          | chr7  | 82585054/C//A  | nonsynonymous | 1 | 0 |
| CROT          | chr7  | 87011387/C//T  | synonymous    | 1 | 0 |
| TRIM56        | chr7  | 100731925/C//T | synonymous    | 1 | 0 |
| POT1          | chr7  | 124537229/G//C | synonymous    | 1 | 0 |
| ADCK2         | chr7  | 140374537/G//C | nonsynonymous | 1 | 0 |
| RHOBTB2       | chr8  | 22863632/C//G  | synonymous    | 1 | 0 |
| UNC5D         | chr8  | 35406896/T//C  | nonsynonymous | 1 | 0 |
| SLC20A2       | chr8  | 42287734/C//T  | synonymous    | 1 | 0 |
| RP1           | chr8  | 55533600/G//A  | nonsynonymous | 1 | 0 |
| RRM2B         | chr8  | 103225048/C//T | nonsynonymous | 1 | 0 |
| RIC1          | chr9  | 5762534/A//T   | synonymous    | 1 | 0 |
| DAPK1         | chr9  | 90321209/G//A  | nonsynonymous | 1 | 0 |
| SH3GLB2       | chr9  | 131777154/C//A | nonsynonymous | 1 | 0 |
| SETX          | chr9  | 135171391/C//T | nonsynonymous | 1 | 0 |
| SVIL          | chr10 | 29818745/T//C  | nonsynonymous | 1 | 0 |
| BMPR1A        | chr10 | 88679109/A//G  | nonsynonymous | 1 | 0 |
| SLF2          | chr10 | 102689692/T//C | synonymous    | 1 | 0 |
| HSPA12A       | chr10 | 118443409/G//C | nonsynonymous | 1 | 0 |
| VAX1          | chr10 | 118893684/C//A | synonymous    | 1 | 0 |
| EDRF1         | chr10 | 127434298/C//T | synonymous    | 1 | 0 |
| ARHGAP1       | chr11 | 46701004/G//A  | nonsynonymous | 1 | 0 |
| PELI3         | chr11 | 66243306/G//A  | nonsynonymous | 1 | 0 |
| SIK2          | chr11 | 111591362/C//T | synonymous    | 1 | 0 |
| OR10G7        | chr11 | 123909311/T//C | nonsynonymous | 1 | 0 |
| ARHGAP32      | chr11 | 128843276/G//C | nonsynonymous | 1 | 0 |
| JAM3          | chr11 | 134014156/G//A | nonsynonymous | 1 | 0 |
| GLB1L2        | chr11 | 134238660/G//T | nonsynonymous | 1 | 0 |
|               | chr12 | 977794/G//T    | synonymous    | 1 | 0 |
| DIP2B         | chr12 | 51112541/T//C  | synonymous    | 1 | 0 |
| TBC1D30       | chr12 | 65264496/G//T  | nonsynonymous | 1 | 0 |
| GRIP1         | chr12 | 67072646/C//A  | synonymous    | 1 | 0 |
| ANKS1B        | chr12 | 99640634/A//G  | nonsynonymous | 1 | 0 |
| GNPTAB        | chr12 | 102174023/A//T | nonsynonymous | 1 | 0 |
| TMEM132C      | chr12 | 129100751/C//G | nonsynonymous | 1 | 0 |
| PCDH20        | chr13 | 61989195/G//A  | nonsynonymous | 1 | 0 |
| CCNB1IP1      | chr14 | 20779574/C//G  | synonymous    | 1 | 0 |
| SLC7A8        | chr14 | 23598961/G//C  | synonymous    | 1 | 0 |
| BCL2L2-PABPN1 | chr14 | 23793256/A//G  | nonsynonymous | 1 | 0 |
| MYH7          | chr14 | 23884470/T//A  | nonsynonymous | 1 | 0 |
| ATP6V1D       | chr14 | 67817358/G//C  | nonsynonymous | 1 | 0 |
| SMOC1         | chr14 | 70418979/G//A  | nonsynonymous | 1 | 0 |
| GOLGA5        | chr14 | 93275790/G//A  | synonymous    | 1 | 0 |
| ASPG          | chr14 | 104571795/C//T | synonymous    | 1 | 0 |
| INF2          | chr14 | 105167964/G//A | nonsynonymous | 1 | 0 |
| TJP1          | chr15 | 30058552/G//A  | nonsynonymous | 1 | 0 |
| BAHD1         | chr15 | 40757624/G//C  | nonsynonymous | 1 | 0 |
| DMXL2         | chr15 | 51839541/T//C  | nonsynonymous | 1 | 0 |
| VWA9          | chr15 | 65877204/G//A  | synonymous    | 1 | 0 |
| CYP1A2        | chr15 | 75042130/C//G  | synonymous    | 1 | 0 |
|               | chr15 | 88522620/C//T  | synonymous    | 1 | 0 |
| MCTP2         | chr15 | 94841792/G//A  | nonsynonymous | 1 | 0 |
| SRCAP         | chr16 | 30749083/C//T  | synonymous    | 1 | 0 |
| CMTM2         | chr16 | 66613997/C//G  | nonsynonymous | 1 | 0 |
| ZNF821        | chr16 | 71894380/T//C  | synonymous    | 1 | 0 |
| COTL1         | chr16 | 84623758/G//A  | nonsynonymous | 1 | 0 |
| IGF2BP1       | chr17 | 47126713/G//A  | nonsynonymous | 1 | 0 |
| TSPOAP1       | chr17 | 56388201/G//C  | nonsynonymous | 1 | 0 |
| RNF43         | chr17 | 56448361/C//A  | nonsynonymous | 1 | 0 |
| HEATR6        | chr17 | 58151235/C//T  | nonsynonymous | 1 | 0 |
| RNF157        | chr17 | 74163136/C//A  | nonsynonymous | 1 | 0 |

|                |       |                  |               |   |   |
|----------------|-------|------------------|---------------|---|---|
| OXLD1          | chr17 | 79632518/C//A    | nonsynonymous | 1 | 0 |
| PPP4R1         | chr18 | 9549327/C//T     | nonsynonymous | 1 | 0 |
| BSG            | chr19 | 577824/G//C      | nonsynonymous | 1 | 0 |
| C19orf35       | chr19 | 2275759/C//G     | nonsynonymous | 1 | 0 |
| MUC16          | chr19 | 9064690/A//G     | nonsynonymous | 1 | 0 |
| ZNF266         | chr19 | 9524719/C//T     | synonymous    | 1 | 0 |
| EPS15L1        | chr19 | 16472589/C//A    | nonsynonymous | 1 | 0 |
| LTBP4          | chr19 | 41112402/C//G    | nonsynonymous | 1 | 0 |
| PLAUR          | chr19 | 44153021/G//A    | synonymous    | 1 | 0 |
| GLTSCR1        | chr19 | 48197973/G//T    | nonsynonymous | 1 | 0 |
| ZSCAN5A        | chr19 | 56735186/G//A    | synonymous    | 1 | 0 |
| FASTKD5        | chr20 | 3128084/G//A     | synonymous    | 1 | 0 |
| RIN2           | chr20 | 19945654/C//G    | nonsynonymous | 1 | 0 |
| RBL1           | chr20 | 35651206/G//C    | synonymous    | 1 | 0 |
| WFDC3          | chr20 | 44416566/G//T    | nonsynonymous | 1 | 0 |
| ZNF51          | chr20 | 47865468/C//T    | nonsynonymous | 1 | 0 |
| TMEM189-UBE2V1 | chr20 | 48744682/C//G    | nonsynonymous | 1 | 0 |
| CCT8           | chr21 | 30433612/G//A    | nonsynonymous | 1 | 0 |
| VPREB1         | chr22 | 22599567/C//G    | nonsynonymous | 1 | 0 |
| NEFH           | chr22 | 29885108/G//T    | nonsynonymous | 1 | 0 |
|                | chr22 | 38155476/A//T    | synonymous    | 1 | 0 |
| FAM227A        | chr22 | 39032603/C//T    | nonsynonymous | 1 | 0 |
| ENTHD1         | chr22 | 40140040/G//A    | synonymous    | 1 | 0 |
| CERK           | chr22 | 47103854/T//A    | nonsynonymous | 1 | 0 |
| PLXNB2         | chr22 | 50725658/G//A    | synonymous    | 1 | 0 |
| PRPS2          | chrX  | 12817374/G//C    | nonsynonymous | 1 | 0 |
| ZFX            | chrX  | 24228302/T//C    | synonymous    | 1 | 0 |
| SHROOM4        | chrX  | 50376942/C//G    | nonsynonymous | 1 | 0 |
| CENPI          | chrX  | 100382211/C//G   | nonsynonymous | 1 | 0 |
| RAB40A         | chrX  | 102755419/C//G   | nonsynonymous | 1 | 0 |
| POLR1B         | chr2  | 113300010/G//C   | synonymous    | 1 | 0 |
| OR5K1          | chr3  | 98189141/T//C    | nonsynonymous | 1 | 0 |
| PCDHB16        | chr5  | 140563574/A//G   | synonymous    | 1 | 0 |
| AHNAK          | chr11 | 62296098/A//G    | synonymous    | 1 | 0 |
| TMEM241        | chr18 | 21017767/A//G    | nonsynonymous | 1 | 0 |
| SERBP1         | chr1  | 67895862/GCTT//G | nonsynonymous | 0 | 1 |
| BAZ2B          | chr2  | 160294939/C//T   | nonsynonymous | 0 | 1 |
| ZNF662         | chr3  | 42956779/A//G    | nonsynonymous | 0 | 1 |
| STXBP5L        | chr3  | 120764365/T//G   | synonymous    | 0 | 1 |
| GMPS           | chr3  | 155654229/T//G   | nonsynonymous | 0 | 1 |
| CCKAR          | chr4  | 26483554/G//A    | synonymous    | 0 | 1 |
| PROB1          | chr5  | 138728758/C//G   | synonymous    | 0 | 1 |
| HIPK3          | chr11 | 33308847/T//C    | nonsynonymous | 0 | 1 |
| CUX2           | chr12 | 111772390/C//T   | synonymous    | 0 | 1 |
| WDR66          | chr12 | 122359412/G//A   | synonymous    | 0 | 1 |
| GPR12          | chr13 | 27333859/C//T    | nonsynonymous | 0 | 1 |
| FLT3           | chr13 | 28597488/G//A    | nonsynonymous | 0 | 1 |
| NBEA           | chr13 | 35630144/A//T    | synonymous    | 0 | 1 |
| BTBD7          | chr14 | 93712622/T//G    | nonsynonymous | 0 | 1 |
| NEDD4L         | chr18 | 56008313/G//A    | nonsynonymous | 0 | 1 |
| REXO1          | chr19 | 1816713/C//T     | nonsynonymous | 0 | 1 |
| AP2A1          | chr19 | 50304309/G//T    | nonsynonymous | 0 | 1 |
| KRTAP10-11     | chr21 | 46066655/C//T    | nonsynonymous | 0 | 1 |
| FOXRED2        | chr22 | 36902196/C//T    | nonsynonymous | 0 | 1 |
| BRD1           | chr22 | 50216641/G//A    | nonsynonymous | 0 | 1 |
| HDX            | chrX  | 83723705/C//A    | nonsynonymous | 0 | 1 |
| AJAP1          | chr1  | 4772468/T//G     | nonsynonymous | 0 | 1 |
| MASP2          | chr1  | 11090239/C//T    | nonsynonymous | 0 | 1 |
| ORC1           | chr1  | 52854133/G//A    | nonsynonymous | 0 | 1 |
| NRAS           | chr1  | 115256529/T//A   | nonsynonymous | 0 | 1 |
| FLG            | chr1  | 152284341/A//G   | synonymous    | 0 | 1 |
| CLK2           | chr1  | 155238138/C//G   | nonsynonymous | 0 | 1 |
| OR6P1          | chr1  | 158532554/T//C   | nonsynonymous | 0 | 1 |
| PYHIN1         | chr1  | 158908242/G//A   | synonymous    | 0 | 1 |
| F5             | chr1  | 169519237/C//T   | nonsynonymous | 0 | 1 |
| TNN            | chr1  | 175048512/G//A   | synonymous    | 0 | 1 |
| PAPPA2         | chr1  | 176709217/T//G   | nonsynonymous | 0 | 1 |
| LMOD1          | chr1  | 201869656/C//T   | nonsynonymous | 0 | 1 |
| LGR6           | chr1  | 202266710/C//T   | synonymous    | 0 | 1 |
| TLR5           | chr1  | 223285735/T//C   | synonymous    | 0 | 1 |

|              |       |                |               |   |   |
|--------------|-------|----------------|---------------|---|---|
| COQ8A        | chr1  | 227153010/T//G | nonsynonymous | 0 | 1 |
| KCNS3        | chr2  | 18113742/A//C  | synonymous    | 0 | 1 |
| C1GALT1C1L   | chr2  | 43902572/C//T  | nonsynonymous | 0 | 1 |
| SERTAD2      | chr2  | 64863684/T//C  | nonsynonymous | 0 | 1 |
| PLEK         | chr2  | 68620372/G//T  | nonsynonymous | 0 | 1 |
| SNRPG        | chr2  | 70515204/A//G  | nonsynonymous | 0 | 1 |
| PAIP2B       | chr2  | 71417053/C//A  | synonymous    | 0 | 1 |
| RPIA         | chr2  | 89036166/T//A  | synonymous    | 0 | 1 |
| GLI2         | chr2  | 121736103/T//C | nonsynonymous | 0 | 1 |
| THSD7B       | chr2  | 137928415/C//T | nonsynonymous | 0 | 1 |
| ZEB2         | chr2  | 145147113/C//G | nonsynonymous | 0 | 1 |
| ERBB4        | chr2  | 212426640/G//C | synonymous    | 0 | 1 |
| PTPRN        | chr2  | 220174086/C//T | synonymous    | 0 | 1 |
| CHPF         | chr2  | 220404338/C//G | nonsynonymous | 0 | 1 |
| HTR2B        | chr2  | 231973849/C//T | synonymous    | 0 | 1 |
| GBX2         | chr2  | 237074550/T//C | synonymous    | 0 | 1 |
| AGXT         | chr2  | 241812439/G//A | nonsynonymous | 0 | 1 |
| BRK1         | chr3  | 10157335/G//A  | synonymous    | 0 | 1 |
| TOP2B        | chr3  | 25665193/A//G  | nonsynonymous | 0 | 1 |
| PHLDB2       | chr3  | 111632285/G//A | synonymous    | 0 | 1 |
| H1FOO        | chr3  | 129262086/G//A | nonsynonymous | 0 | 1 |
| SI           | chr3  | 164739065/T//G | nonsynonymous | 0 | 1 |
| MUC4         | chr3  | 195512982/G//C | synonymous    | 0 | 1 |
| ABLIM2       | chr4  | 7968660/G//A   | synonymous    | 0 | 1 |
| ATP8A1       | chr4  | 42416704/C//T  | nonsynonymous | 0 | 1 |
| SLC4A4       | chr4  | 72332167/T//C  | synonymous    | 0 | 1 |
| LAMTOR3      | chr4  | 100808515/G//T | synonymous    | 0 | 1 |
| CLGN         | chr4  | 141320019/G//T | synonymous    | 0 | 1 |
| DCHS2        | chr4  | 155155671/T//C | synonymous    | 0 | 1 |
| SEMA5A       | chr5  | 9197321/A//C   | nonsynonymous | 0 | 1 |
| ANKRD33B     | chr5  | 10618448/G//A  | nonsynonymous | 0 | 1 |
| PDE6A        | chr5  | 149274859/A//G | synonymous    | 0 | 1 |
| HMP19        | chr5  | 173473876/G//A | nonsynonymous | 0 | 1 |
| HK3          | chr5  | 176310821/A//G | nonsynonymous | 0 | 1 |
| GMPR         | chr6  | 16279125/A//T  | synonymous    | 0 | 1 |
| ENPP4        | chr6  | 46107400/A//C  | nonsynonymous | 0 | 1 |
| ANKRD6       | chr6  | 90326335/A//T  | nonsynonymous | 0 | 1 |
| PTPRK        | chr6  | 128294223/C//T | nonsynonymous | 0 | 1 |
| UTRN         | chr6  | 145157070/C//A | nonsynonymous | 0 | 1 |
| SYNE1        | chr6  | 152532625/C//A | synonymous    | 0 | 1 |
| CCDC129      | chr7  | 31682778/G//T  | nonsynonymous | 0 | 1 |
| AKAP9        | chr7  | 91718731/C//T  | synonymous    | 0 | 1 |
| SSPO         | chr7  | 149494361/T//G | nonsynonymous | 0 | 1 |
|              | chr8  | 10411536/A//G  | synonymous    | 0 | 1 |
| PIWIL2       | chr8  | 22140549/C//T  | nonsynonymous | 0 | 1 |
| DOCK5        | chr8  | 25132925/C//G  | nonsynonymous | 0 | 1 |
| SOX17        | chr8  | 55371890/C//A  | nonsynonymous | 0 | 1 |
| RAB2A        | chr8  | 61504424/G//C  | nonsynonymous | 0 | 1 |
| MSC          | chr8  | 72754928/C//A  | nonsynonymous | 0 | 1 |
| ZFHx4        | chr8  | 77766530/T//G  | nonsynonymous | 0 | 1 |
| LRRC14       | chr8  | 145745758/G//A | nonsynonymous | 0 | 1 |
| SMC2         | chr9  | 106860814/C//T | nonsynonymous | 0 | 1 |
| KCNT1        | chr9  | 138670570/G//A | synonymous    | 0 | 1 |
| NMT2         | chr10 | 15161351/A//T  | nonsynonymous | 0 | 1 |
| PARD3        | chr10 | 34637002/A//G  | synonymous    | 0 | 1 |
| ERCC6        | chr10 | 50678262/G//A  | synonymous    | 0 | 1 |
| TCERG1L      | chr10 | 132944928/T//G | synonymous    | 0 | 1 |
| TRIM6-TRIM34 | chr11 | 5626619/G//A   | nonsynonymous | 0 | 1 |
| DNHD1        | chr11 | 6565367/G//A   | synonymous    | 0 | 1 |
| DNHD1        | chr11 | 6579727/A//C   | nonsynonymous | 0 | 1 |
| DNHD1        | chr11 | 6589893/A//C   | nonsynonymous | 0 | 1 |
| NAT10        | chr11 | 34145931/A//G  | nonsynonymous | 0 | 1 |
| OR5B2        | chr11 | 58190240/A//G  | synonymous    | 0 | 1 |
| B4GAT1       | chr11 | 66114981/G//T  | nonsynonymous | 0 | 1 |
| NAALAD2      | chr11 | 89916117/G//T  | synonymous    | 0 | 1 |
| POU2F3       | chr11 | 120173073/C//G | nonsynonymous | 0 | 1 |
| TECTA        | chr11 | 120984420/C//T | synonymous    | 0 | 1 |
| RHNO1        | chr12 | 2997238/C//A   | synonymous    | 0 | 1 |
| FGF23        | chr12 | 4479590/C//A   | synonymous    | 0 | 1 |
| KCNA1        | chr12 | 5021148/G//T   | nonsynonymous | 0 | 1 |

|          |       |                  |               |   |   |
|----------|-------|------------------|---------------|---|---|
| PTPRO    | chr12 | 15702109/T//A    | nonsynonymous | 0 | 1 |
| CNTN1    | chr12 | 41327362/A//C    | nonsynonymous | 0 | 1 |
| NTN4     | chr12 | 96180806/C//T    | nonsynonymous | 0 | 1 |
| NCOR2    | chr12 | 124810039/C//T   | nonsynonymous | 0 | 1 |
| SIAH3    | chr13 | 46357672/C//T    | nonsynonymous | 0 | 1 |
| NEK5     | chr13 | 52678655/C//G    | nonsynonymous | 0 | 1 |
| TEP1     | chr14 | 20852773/C//G    | synonymous    | 0 | 1 |
| TEP1     | chr14 | 20876433/G//C    | nonsynonymous | 0 | 1 |
| OR4E2    | chr14 | 22133978/C//T    | nonsynonymous | 0 | 1 |
| HEATR5A  | chr14 | 31792965/CCTT//C | nonsynonymous | 0 | 1 |
| CDKL1    | chr14 | 50862550/C//G    | nonsynonymous | 0 | 1 |
| ATG14    | chr14 | 55852764/G//C    | nonsynonymous | 0 | 1 |
| GALNT16  | chr14 | 69799865/C//G    | nonsynonymous | 0 | 1 |
| AK7      | chr14 | 96871210/A//G    | synonymous    | 0 | 1 |
|          | chr14 | 102606531/G//A   | synonymous    | 0 | 1 |
| GCOM1    | chr15 | 58004258/C//T    | nonsynonymous | 0 | 1 |
| DENND4A  | chr15 | 66044774/T//G    | nonsynonymous | 0 | 1 |
| TLE3     | chr15 | 70350553/G//C    | nonsynonymous | 0 | 1 |
| CEMIP    | chr15 | 81225691/G//A    | nonsynonymous | 0 | 1 |
| SRCAP    | chr16 | 30734433/T//G    | nonsynonymous | 0 | 1 |
| FBXL19   | chr16 | 30941859/C//T    | nonsynonymous | 0 | 1 |
| ATP6V0D1 | chr16 | 67487558/G//C    | nonsynonymous | 0 | 1 |
| TMEM132E | chr17 | 32965126/G//A    | nonsynonymous | 0 | 1 |
| KRT13    | chr17 | 39659270/G//A    | synonymous    | 0 | 1 |
| MMD      | chr17 | 53471754/A//C    | nonsynonymous | 0 | 1 |
| CCDC47   | chr17 | 61843417/G//A    | nonsynonymous | 0 | 1 |
| GPR142   | chr17 | 72366808/G//C    | nonsynonymous | 0 | 1 |
| ZACN     | chr17 | 74076386/A//G    | nonsynonymous | 0 | 1 |
| ELANE    | chr19 | 852977/G//A      | nonsynonymous | 0 | 1 |
| ZNRF4    | chr19 | 5456372/G//C     | nonsynonymous | 0 | 1 |
| TNFSF14  | chr19 | 6665234/G//A     | synonymous    | 0 | 1 |
| MUC16    | chr19 | 9014592/T//G     | nonsynonymous | 0 | 1 |
| OR7A5    | chr19 | 14938830/G//A    | nonsynonymous | 0 | 1 |
| PPM1N    | chr19 | 46001838/C//T    | synonymous    | 0 | 1 |
| NCR1     | chr19 | 55424060/C//A    | nonsynonymous | 0 | 1 |
| ZNF274   | chr19 | 58721330/T//G    | nonsynonymous | 0 | 1 |
| BPIFB2   | chr20 | 31609146/C//T    | synonymous    | 0 | 1 |
| SALL4    | chr20 | 50407527/T//A    | nonsynonymous | 0 | 1 |
| ITGB2    | chr21 | 46314973/T//A    | nonsynonymous | 0 | 1 |
| CLTCL1   | chr22 | 19230413/T//A    | nonsynonymous | 0 | 1 |
| CENPM    | chr22 | 42335163/A//G    | nonsynonymous | 0 | 1 |
| DCAF8L1  | chrX  | 27999353/C//T    | synonymous    | 0 | 1 |
| CHRD1    | chrX  | 109963159/G//T   | synonymous    | 0 | 1 |
| TBC1D4   | chr13 | 76055813/G//A    | nonsynonymous | 0 | 1 |
| MIB1     | chr18 | 19378037/T//C    | synonymous    | 0 | 1 |
| CATSPERD | chr19 | 5720779/A//G     | nonsynonymous | 0 | 1 |
| LRP3     | chr19 | 33697160/G//A    | nonsynonymous | 0 | 1 |
| EMP3     | chr19 | 48833734/C//T    | synonymous    | 0 | 1 |
| DCST2    | chr1  | 155005168/T//A   | synonymous    | 1 | 0 |
| GLI2     | chr2  | 121746035/G//A   | nonsynonymous | 1 | 0 |
| MSTN     | chr2  | 190922144/T//C   | nonsynonymous | 1 | 0 |
| RBM44    | chr2  | 238738143/C//A   | nonsynonymous | 1 | 0 |
| MUC4     | chr3  | 195513345/A//C   | synonymous    | 1 | 0 |
| TRPA1    | chr8  | 72945944/C//A    | nonsynonymous | 1 | 0 |
| TMEM38B  | chr9  | 108536368/G//T   | synonymous    | 1 | 0 |
| USP6NL   | chr10 | 11567400/C//A    | nonsynonymous | 1 | 0 |
| HELLS    | chr10 | 96336475/T//C    | synonymous    | 1 | 0 |
| ERC1     | chr12 | 1136990/A//G     | synonymous    | 1 | 0 |
| AMN1     | chr12 | 31850691/C//T    | nonsynonymous | 1 | 0 |
| HPD      | chr12 | 122295293/A//G   | nonsynonymous | 1 | 0 |
| C1QTNF8  | chr16 | 1143931/G//T     | nonsynonymous | 1 | 0 |
| PANX2    | chr22 | 50615940/G//T    | nonsynonymous | 1 | 0 |
| HIVEP3   | chr1  | 42047370/C//T    | synonymous    | 0 | 1 |
| PYGO2    | chr1  | 154931962/C//CCA | nonsynonymous | 0 | 1 |
| TPO      | chr2  | 1481359/G//A     | nonsynonymous | 0 | 1 |
| ALK      | chr2  | 30143189/C//T    | nonsynonymous | 0 | 1 |
| DNAH7    | chr2  | 196729628/G//A   | nonsynonymous | 0 | 1 |
| SH3BP4   | chr2  | 235951463/G//A   | nonsynonymous | 0 | 1 |
| GPR27    | chr3  | 71803695/C//G    | nonsynonymous | 0 | 1 |
| SULT1E1  | chr4  | 70707807/T//C    | nonsynonymous | 0 | 1 |

|          |       |                     |               |   |   |
|----------|-------|---------------------|---------------|---|---|
| CDKL3    | chr5  | 133634358/C//A      | nonsynonymous | 0 | 1 |
| LCP2     | chr5  | 169693840/A//G      | synonymous    | 0 | 1 |
| DNAAF5   | chr7  | 766531/G//A         | synonymous    | 0 | 1 |
| SDK1     | chr7  | 4247766/G//A        | synonymous    | 0 | 1 |
| C7orf72  | chr7  | 50191089/G//A       | nonsynonymous | 0 | 1 |
| UNC5D    | chr8  | 35648045/A//G       | synonymous    | 0 | 1 |
| FAM135B  | chr8  | 139144962/G//A      | synonymous    | 0 | 1 |
| DIRAS2   | chr9  | 93376084/C//T       | nonsynonymous | 0 | 1 |
| KIAA1217 | chr10 | 24813284/AC//A      | nonsynonymous | 0 | 1 |
| PLPP4    | chr10 | 122216878/G//A      | synonymous    | 0 | 1 |
| MYOD1    | chr11 | 17741687/C//T       | nonsynonymous | 0 | 1 |
| HHIPL1   | chr14 | 100125805/C//T      | nonsynonymous | 0 | 1 |
| AKT1     | chr14 | 105246551/C//T      | nonsynonymous | 0 | 1 |
| FAM227B  | chr15 | 49800421/T//C       | synonymous    | 0 | 1 |
| RIT2     | chr18 | 40323472/C//A       | nonsynonymous | 0 | 1 |
| LOXHD1   | chr18 | 44171911/G//A       | nonsynonymous | 0 | 1 |
| PRR22    | chr19 | 5783194/A//T        | nonsynonymous | 0 | 1 |
| ZNF844   | chr19 | 12187112/A//G       | nonsynonymous | 0 | 1 |
| ZNF432   | chr19 | 52538316/C//T       | nonsynonymous | 0 | 1 |
| PRKCG    | chr19 | 54395793/G//A       | synonymous    | 0 | 1 |
| NLRP13   | chr19 | 56424494/G//A       | nonsynonymous | 0 | 1 |
| HIC2     | chr22 | 21800028/C//T       | nonsynonymous | 0 | 1 |
| ELFN2    | chr22 | 37769180/C//T       | nonsynonymous | 0 | 1 |
| MAPK12   | chr22 | 50693806/G//A       | synonymous    | 0 | 1 |
| ACOT11   | chr1  | 55050334/G//A       | nonsynonymous | 0 | 1 |
| ZNF678   | chr1  | 227843384/G//A      | nonsynonymous | 0 | 1 |
| RYR2     | chr1  | 237711896/T//A      | synonymous    | 0 | 1 |
| PLD5     | chr1  | 242687627/G//A      | synonymous    | 0 | 1 |
| SCN5A    | chr3  | 38618222/G//A       | synonymous    | 0 | 1 |
| TREX1    | chr3  | 48509005/G//A       | synonymous    | 0 | 1 |
| TXNRD3   | chr3  | 126349772/A//G      | nonsynonymous | 0 | 1 |
| ABCF3    | chr3  | 183904014/A//G      | nonsynonymous | 0 | 1 |
| MCTP1    | chr5  | 94620278/A//C       | nonsynonymous | 0 | 1 |
| PCDHA6   | chr5  | 140207736/C//T      | synonymous    | 0 | 1 |
| SIM1     | chr6  | 100897265/C//A      | nonsynonymous | 0 | 1 |
| GOPC     | chr6  | 117898621/A//G      | nonsynonymous | 0 | 1 |
| SYTL3    | chr6  | 159139232/G//A      | nonsynonymous | 0 | 1 |
| SLC39A12 | chr10 | 18242199/C//T       | synonymous    | 0 | 1 |
| UNC5B    | chr10 | 73050771/G//A       | nonsynonymous | 0 | 1 |
| BEST1    | chr11 | 61727361/C//T       | synonymous    | 0 | 1 |
| DYRK2    | chr12 | 68043728/G//C       | synonymous    | 0 | 1 |
| STRC     | chr15 | 43892860/C//T       | nonsynonymous | 0 | 1 |
| CACNA1H  | chr16 | 1260814/G//A        | nonsynonymous | 0 | 1 |
| SHISA9   | chr16 | 12996110/G//A       | synonymous    | 0 | 1 |
| ACSM2B   | chr16 | 20557723/T//A       | nonsynonymous | 0 | 1 |
| SF3B3    | chr16 | 70566519/T//C       | synonymous    | 0 | 1 |
| TMEM100  | chr17 | 53798125/T//A       | nonsynonymous | 0 | 1 |
| OLIG1    | chr21 | 34442945/C//A       | synonymous    | 0 | 1 |
| BAIAP2L2 | chr22 | 38494065/C//T       | synonymous    | 0 | 1 |
| NOX1     | chrX  | 100125762/G//A      | synonymous    | 0 | 1 |
| RGAG1    | chrX  | 109694569/A//G      | nonsynonymous | 0 | 1 |
| MTOR     | chr1  | 11300434/G//A       | nonsynonymous | 1 | 0 |
| RSG1     | chr1  | 16558642/G//A       | synonymous    | 1 | 0 |
| HIVEP3   | chr1  | 42047553/G//T       | synonymous    | 1 | 0 |
| LRRC41   | chr1  | 46751322/G//A       | nonsynonymous | 1 | 0 |
| PLPP3    | chr1  | 57002669/G//A       | synonymous    | 1 | 0 |
| FLG      | chr1  | 152283029/C//T      | nonsynonymous | 1 | 0 |
| HCN3     | chr1  | 155258058/G//A      | nonsynonymous | 1 | 0 |
| TGFB2    | chr1  | 218578621/C//T      | nonsynonymous | 1 | 0 |
| EPRS     | chr1  | 220206946/TAAAGG//T | nonsynonymous | 1 | 0 |
| PRSS38   | chr1  | 228033871/G//A      | nonsynonymous | 1 | 0 |
| KIF26B   | chr1  | 245530662/C//CA     | nonsynonymous | 1 | 0 |
| GCKR     | chr2  | 27746408/C//A       | synonymous    | 1 | 0 |
| PLB1     | chr2  | 28788148/C//A       | nonsynonymous | 1 | 0 |
| LBH      | chr2  | 30457350/C//T       | nonsynonymous | 1 | 0 |
| CDC42EP3 | chr2  | 37873277/T//C       | nonsynonymous | 1 | 0 |
| HK2      | chr2  | 75107448/G//A       | nonsynonymous | 1 | 0 |
| SFTP3    | chr2  | 85890558/C//T       | nonsynonymous | 1 | 0 |
| SFTP3    | chr2  | 85892764/C//T       | nonsynonymous | 1 | 0 |
| FAHD2B   | chr2  | 97749714/C//T       | nonsynonymous | 1 | 0 |

|          |       |                |               |   |   |
|----------|-------|----------------|---------------|---|---|
| ITGAV    | chr2  | 187532395/T//C | synonymous    | 1 | 0 |
| UNC80    | chr2  | 210681643/G//A | nonsynonymous | 1 | 0 |
| ERBB4    | chr2  | 212566803/T//C | nonsynonymous | 1 | 0 |
| ERBB4    | chr2  | 212570063/C//T | nonsynonymous | 1 | 0 |
| EFHD1    | chr2  | 233527654/C//T | nonsynonymous | 1 | 0 |
| CNTN4    | chr3  | 2861218/G//A   | nonsynonymous | 1 | 0 |
| TMEM43   | chr3  | 14172437/G//A  | nonsynonymous | 1 | 0 |
| CTNNB1   | chr3  | 41275300/A//G  | nonsynonymous | 1 | 0 |
| KLHDC8B  | chr3  | 49212285/G//A  | nonsynonymous | 1 | 0 |
| BSN      | chr3  | 49688471/G//A  | nonsynonymous | 1 | 0 |
| STAB1    | chr3  | 52540709/G//A  | nonsynonymous | 1 | 0 |
| CADPS    | chr3  | 62860386/G//A  | nonsynonymous | 1 | 0 |
| FAM19A4  | chr3  | 68782292/G//A  | synonymous    | 1 | 0 |
| OTOL1    | chr3  | 161214726/T//C | nonsynonymous | 1 | 0 |
| PEX5L    | chr3  | 179525600/C//T | nonsynonymous | 1 | 0 |
| CLRN2    | chr4  | 17524630/G//A  | nonsynonymous | 1 | 0 |
| POLR2B   | chr4  | 57897157/A//G  | synonymous    | 1 | 0 |
| UGT2A2   | chr4  | 70455274/C//T  | nonsynonymous | 1 | 0 |
| ZDHHC11  | chr5  | 843723/C//A    | nonsynonymous | 1 | 0 |
| ZDHHC11  | chr5  | 843815/C//T    | synonymous    | 1 | 0 |
| ERAP2    | chr5  | 96222388/T//C  | synonymous    | 1 | 0 |
| SLCO6A1  | chr5  | 101816044/G//A | synonymous    | 1 | 0 |
| CEP120   | chr5  | 122748148/T//C | synonymous    | 1 | 0 |
| PRRC2A   | chr6  | 31592275/G//A  | nonsynonymous | 1 | 0 |
| EGFL8    | chr6  | 32134691/C//G  | nonsynonymous | 1 | 0 |
| BYSL     | chr6  | 41895235/G//A  | nonsynonymous | 1 | 0 |
| SERINC1  | chr6  | 122792936/C//G | synonymous    | 1 | 0 |
| SLC35D3  | chr6  | 137245340/G//A | nonsynonymous | 1 | 0 |
| VWDE     | chr7  | 12417482/G//A  | nonsynonymous | 1 | 0 |
| ZNF680   | chr7  | 64004737/C//T  | nonsynonymous | 1 | 0 |
| AUTS2    | chr7  | 70227938/G//A  | synonymous    | 1 | 0 |
| FKBP6    | chr7  | 72743431/C//T  | nonsynonymous | 1 | 0 |
| ABCB4    | chr7  | 87031527/A//G  | nonsynonymous | 1 | 0 |
| MUC17    | chr7  | 100682625/T//C | nonsynonymous | 1 | 0 |
| FLNC     | chr7  | 128492997/C//T | synonymous    | 1 | 0 |
| AGBL3    | chr7  | 134718909/C//T | synonymous    | 1 | 0 |
|          | chr7  | 137151673/C//T | synonymous    | 1 | 0 |
| KIAA1549 | chr7  | 138546161/C//T | synonymous    | 1 | 0 |
| CNTNAP2  | chr7  | 147336321/C//A | nonsynonymous | 1 | 0 |
| ARHGEF10 | chr8  | 1900959/G//A   | synonymous    | 1 | 0 |
| DKK4     | chr8  | 42231801/T//C  | synonymous    | 1 | 0 |
| CYP7A1   | chr8  | 59409193/G//A  | nonsynonymous | 1 | 0 |
| ZFHx4    | chr8  | 77619880/G//C  | nonsynonymous | 1 | 0 |
| ZFHx4    | chr8  | 77763460/C//T  | nonsynonymous | 1 | 0 |
| DCAF4L2  | chr8  | 88886244/G//A  | synonymous    | 1 | 0 |
| JRK      | chr8  | 143740392/C//T | synonymous    | 1 | 0 |
| SMARCA2  | chr9  | 2081976/C//G   | nonsynonymous | 1 | 0 |
| IFNA5    | chr9  | 21305264/T//C  | synonymous    | 1 | 0 |
| TLN1     | chr9  | 35717362/C//T  | nonsynonymous | 1 | 0 |
| HABP4    | chr9  | 99220765/C//T  | nonsynonymous | 1 | 0 |
| OR13C5   | chr9  | 107361216/G//A | nonsynonymous | 1 | 0 |
| OR1J2    | chr9  | 125273995/C//A | nonsynonymous | 1 | 0 |
| BARHL1   | chr9  | 135458451/G//A | synonymous    | 1 | 0 |
| CACNA1B  | chr9  | 140907687/C//T | nonsynonymous | 1 | 0 |
| TIAL1    | chr10 | 121336654/C//A | nonsynonymous | 1 | 0 |
| OR51I1   | chr11 | 5462460/C//T   | synonymous    | 1 | 0 |
| FAM160A2 | chr11 | 6244908/G//C   | nonsynonymous | 1 | 0 |
| RBMXL2   | chr11 | 7110641/C//T   | nonsynonymous | 1 | 0 |
| SLC15A3  | chr11 | 60718796/C//T  | synonymous    | 1 | 0 |
| RTN3     | chr11 | 63486826/C//T  | synonymous    | 1 | 0 |
| PDE2A    | chr11 | 72290042/G//A  | nonsynonymous | 1 | 0 |
| SYTL2    | chr11 | 85468769/T//A  | synonymous    | 1 | 0 |
| SCN3B    | chr11 | 123509026/T//A | nonsynonymous | 1 | 0 |
| OR10G4   | chr11 | 123886957/C//T | nonsynonymous | 1 | 0 |
| NFRKB    | chr11 | 129739590/G//A | synonymous    | 1 | 0 |
| CACNA1C  | chr12 | 2595411/A//C   | nonsynonymous | 1 | 0 |
| KRT6C    | chr12 | 52864970/G//A  | synonymous    | 1 | 0 |
| POLR3B   | chr12 | 106821012/T//G | nonsynonymous | 1 | 0 |
| OR4N2    | chr14 | 20296101/G//A  | nonsynonymous | 1 | 0 |
| SLC7A8   | chr14 | 23607214/A//G  | nonsynonymous | 1 | 0 |

|          |       |                |               |   |   |
|----------|-------|----------------|---------------|---|---|
| ZFHX2    | chr14 | 23991694/G//A  | nonsynonymous | 1 | 0 |
| DACT1    | chr14 | 59113321/C//T  | synonymous    | 1 | 0 |
| ERH      | chr14 | 69847243/C//A  | synonymous    | 1 | 0 |
| ADAM20   | chr14 | 70990766/C//T  | nonsynonymous | 1 | 0 |
| TSHR     | chr14 | 81610191/G//A  | nonsynonymous | 1 | 0 |
| EML5     | chr14 | 89161739/C//T  | nonsynonymous | 1 | 0 |
| CHRFAM7A | chr15 | 30659641/C//T  | nonsynonymous | 1 | 0 |
| C15orf41 | chr15 | 36989592/G//T  | nonsynonymous | 1 | 0 |
| THSD4    | chr15 | 71507432/C//T  | nonsynonymous | 1 | 0 |
| CHTF18   | chr16 | 845792/C//T    | synonymous    | 1 | 0 |
| KIAA0556 | chr16 | 27752153/C//A  | synonymous    | 1 | 0 |
| EXOC3L1  | chr16 | 67221630/G//C  | nonsynonymous | 1 | 0 |
| CDT1     | chr16 | 88873746/G//A  | nonsynonymous | 1 | 0 |
| CLUH     | chr17 | 2607687/AG//A  | nonsynonymous | 1 | 0 |
| ALOX15   | chr17 | 4542813/C//T   | synonymous    | 1 | 0 |
| RNF112   | chr17 | 19319607/G//A  | synonymous    | 1 | 0 |
| KRTAP4-6 | chr17 | 39296225/C//T  | nonsynonymous | 1 | 0 |
| MPO      | chr17 | 56355377/C//T  | nonsynonymous | 1 | 0 |
| TGIF1    | chr18 | 3457742/T//TC  | nonsynonymous | 1 | 0 |
| PIEZO2   | chr18 | 10744143/C//T  | nonsynonymous | 1 | 0 |
| MC5R     | chr18 | 13826685/G//A  | synonymous    | 1 | 0 |
| SHC2     | chr19 | 436408/G//A    | synonymous    | 1 | 0 |
| MUC16    | chr19 | 9072181/G//T   | nonsynonymous | 1 | 0 |
| ZNF429   | chr19 | 21719394/A//T  | nonsynonymous | 1 | 0 |
| FFAR1    | chr19 | 35842809/A//T  | nonsynonymous | 1 | 0 |
| PRR19    | chr19 | 42814947/A//G  | synonymous    | 1 | 0 |
| RUVBL2   | chr19 | 49507610/A//G  | nonsynonymous | 1 | 0 |
| MYBPC2   | chr19 | 50958370/CT//C | nonsynonymous | 1 | 0 |
| SIRPA    | chr20 | 1918249/C//T   | synonymous    | 1 | 0 |
| DSTN     | chr20 | 17587904/T//C  | synonymous    | 1 | 0 |
| NCOA6    | chr20 | 33370078/A//C  | nonsynonymous | 1 | 0 |
| PABPC1L  | chr20 | 43545422/G//A  | nonsynonymous | 1 | 0 |
| TP53TG5  | chr20 | 44003892/G//A  | synonymous    | 1 | 0 |
| CTCFL    | chr20 | 56083709/G//T  | nonsynonymous | 1 | 0 |
| KRTAP8-1 | chr21 | 32185530/G//A  | synonymous    | 1 | 0 |
| DSCAM    | chr21 | 41725556/C//T  | nonsynonymous | 1 | 0 |
| CCDC157  | chr22 | 30768224/G//A  | synonymous    | 1 | 0 |
| SLC25A17 | chr22 | 41173230/A//G  | nonsynonymous | 1 | 0 |
| NIPAL3   | chr1  | 24795521/T//G  | nonsynonymous | 1 | 0 |
| ZNF691   | chr1  | 43316884/A//T  | synonymous    | 1 | 0 |
| RGL1     | chr1  | 183895277/A//T | nonsynonymous | 1 | 0 |
| IGFN1    | chr1  | 201180808/G//A | nonsynonymous | 1 | 0 |
| ZC3H11A  | chr1  | 203818931/G//C | nonsynonymous | 1 | 0 |
| KCNH1    | chr1  | 210856674/T//C | nonsynonymous | 1 | 0 |
| YWHAQ    | chr2  | 9731565/T//A   | nonsynonymous | 1 | 0 |
| SLC4A1AP | chr2  | 27888009/A//G  | nonsynonymous | 1 | 0 |
| PSMD1    | chr2  | 232035379/G//A | nonsynonymous | 1 | 0 |
| TMEM45A  | chr3  | 100275773/G//T | synonymous    | 1 | 0 |
| ZGRF1    | chr4  | 113539924/T//C | nonsynonymous | 1 | 0 |
| FAT4     | chr4  | 126238403/G//C | nonsynonymous | 1 | 0 |
| MDN1     | chr6  | 90402180/G//C  | synonymous    | 1 | 0 |
|          | chr7  | 50560685/A//T  | synonymous    | 1 | 0 |
| TSGA13   | chr7  | 130356591/A//G | nonsynonymous | 1 | 0 |
| NUP205   | chr7  | 135277883/G//A | synonymous    | 1 | 0 |
| IDO1     | chr8  | 39781020/G//A  | nonsynonymous | 1 | 0 |
| CKS2     | chr9  | 91926142/A//G  | synonymous    | 1 | 0 |
| SORCS1   | chr10 | 108521360/T//C | synonymous    | 1 | 0 |
| B4GALNT4 | chr11 | 376945/G//A    | nonsynonymous | 1 | 0 |
| KRTAP5-4 | chr11 | 1642937/T//C   | synonymous    | 1 | 0 |
| OR52N4   | chr11 | 5776584/C//T   | nonsynonymous | 1 | 0 |
| B3GAT3   | chr11 | 62384462/C//G  | nonsynonymous | 1 | 0 |
| SORL1    | chr11 | 121476119/G//T | nonsynonymous | 1 | 0 |
| CLEC12A  | chr12 | 10137646/A//G  | synonymous    | 1 | 0 |
| BORCS5   | chr12 | 12588589/C//T  | nonsynonymous | 1 | 0 |
| AVPR1A   | chr12 | 63543907/C//T  | nonsynonymous | 1 | 0 |
| ACACB    | chr12 | 109637216/T//G | nonsynonymous | 1 | 0 |
| PLA2G1B  | chr12 | 120763765/G//C | nonsynonymous | 1 | 0 |
| MAB21L1  | chr13 | 36050224/C//T  | nonsynonymous | 1 | 0 |
| RNASE2   | chr14 | 21424286/A//C  | nonsynonymous | 1 | 0 |
| MYH7     | chr14 | 23900833/G//T  | synonymous    | 1 | 0 |



|           |       |                          |               |   |   |
|-----------|-------|--------------------------|---------------|---|---|
| C14orf105 | chr14 | 57938165/C//G            | nonsynonymous | 1 | 0 |
| CIPC      | chr14 | 77580486/A//T            | nonsynonymous | 1 | 0 |
| HERC2     | chr15 | 28362228/C//A            | nonsynonymous | 1 | 0 |
| FAM174B   | chr15 | 93198737/G//C            | synonymous    | 1 | 0 |
| GSPT1     | chr16 | 11981479/CTCTTGTGGCCAGGG | nonsynonymous | 1 | 0 |
| EDC4      | chr16 | 67914478/G//A            | nonsynonymous | 1 | 0 |
| TAT       | chr16 | 71602127/C//T            | nonsynonymous | 1 | 0 |
| ZNF469    | chr16 | 88494622/C//T            | synonymous    | 1 | 0 |
| PIGS      | chr17 | 26881391/C//T            | synonymous    | 1 | 0 |
| IMPA2     | chr18 | 12030540/C//T            | synonymous    | 1 | 0 |
| DCC       | chr18 | 50592522/T//C            | nonsynonymous | 1 | 0 |
| IZUMO4    | chr19 | 2097022/CAAG//C          | nonsynonymous | 1 | 0 |
| ITPKC     | chr19 | 41235244/C//T            | nonsynonymous | 1 | 0 |
| ZNF766    | chr19 | 52793565/T//C            | nonsynonymous | 1 | 0 |
| SOGA1     | chr20 | 35444182/C//A            | nonsynonymous | 1 | 0 |
| MTIF2     | chr2  | 55489531/T//C            | synonymous    | 0 | 1 |
| HACE1     | chr6  | 105232049/C//T           | nonsynonymous | 0 | 1 |
| EYA4      | chr6  | 133789852/G//A           | nonsynonymous | 0 | 1 |
| MUC12     | chr7  | 100646729/C//A           | synonymous    | 0 | 1 |
| BICD2     | chr9  | 95481847/C//T            | synonymous    | 0 | 1 |
| FAM222A   | chr12 | 110205821/G//T           | nonsynonymous | 0 | 1 |
| ABCC12    | chr16 | 48174690/G//A            | nonsynonymous | 0 | 1 |
| ZNF429    | chr19 | 21720109/T//A            | synonymous    | 0 | 1 |
| ZNF208    | chr19 | 22154475/T//C            | nonsynonymous | 0 | 1 |
| NCOA3     | chr20 | 46279845/G//A            | synonymous    | 0 | 1 |
| KCNQ2     | chr20 | 62076064/C//T            | nonsynonymous | 0 | 1 |
| ARFGAP3   | chr22 | 43193568/A//G            | synonymous    | 0 | 1 |
| KLHL21    | chr1  | 6662647/C//T             | synonymous    | 0 | 1 |
| OR2M5     | chr1  | 248309108/G//A           | nonsynonymous | 0 | 1 |
| CHL1      | chr3  | 382469/T//C              | synonymous    | 0 | 1 |
| ZIC4      | chr3  | 147109032/G//A           | synonymous    | 0 | 1 |
| ZNF479    | chr7  | 57188201/G//A            | synonymous    | 0 | 1 |
| NUSAP1    | chr15 | 41672446/T//A            | synonymous    | 0 | 1 |
| TPSD1     | chr16 | 1306897/A//C             | synonymous    | 0 | 1 |
| ABCC1     | chr16 | 16230488/G//A            | nonsynonymous | 0 | 1 |
| TMEM88    | chr17 | 7758795/G//A             | synonymous    | 0 | 1 |
| PNMAL2    | chr19 | 46997064/G//A            | synonymous    | 0 | 1 |
| CACNA11   | chr22 | 40042724/T//G            | nonsynonymous | 0 | 1 |
| RERE      | chr1  | 8420835/T//C             | nonsynonymous | 1 | 0 |
| DISP3     | chr1  | 11589860/C//G            | synonymous    | 1 | 0 |
| PLEKHM2   | chr1  | 16059199/C//T            | synonymous    | 1 | 0 |
| EMC1      | chr1  | 19566346/T//C            | nonsynonymous | 1 | 0 |
| HSPG2     | chr1  | 22168589/C//T            | synonymous    | 1 | 0 |
| ADGRB2    | chr1  | 32222875/G//T            | synonymous    | 1 | 0 |
| MACF1     | chr1  | 39913738/C//CT           | nonsynonymous | 1 | 0 |
| ELAVL4    | chr1  | 50659594/A//G            | synonymous    | 1 | 0 |
| IL23R     | chr1  | 67685284/T//C            | nonsynonymous | 1 | 0 |
| HHLA3     | chr1  | 70820691/A//T            | synonymous    | 1 | 0 |
| LPAR3     | chr1  | 85279765/T//C            | nonsynonymous | 1 | 0 |
| SH3GLB1   | chr1  | 87200833/T//C            | synonymous    | 1 | 0 |
| MYBPHL    | chr1  | 109838868/G//T           | synonymous    | 1 | 0 |
| CHIA      | chr1  | 111863043/C//T           | synonymous    | 1 | 0 |
| DPM3      | chr1  | 155112388/T//C           | synonymous    | 1 | 0 |
| DUSP27    | chr1  | 167096121/A//G           | nonsynonymous | 1 | 0 |
| XCL2      | chr1  | 168513203/G//A           | synonymous    | 1 | 0 |
| SELE      | chr1  | 169701773/A//G           | nonsynonymous | 1 | 0 |
| METTL11B  | chr1  | 170115238/C//G           | synonymous    | 1 | 0 |
| PRRX1     | chr1  | 170695538/T//C           | nonsynonymous | 1 | 0 |
| ABL2      | chr1  | 179100616/T//A           | nonsynonymous | 1 | 0 |
| ZBTB41    | chr1  | 197128476/T//A           | synonymous    | 1 | 0 |
| MYBPH     | chr1  | 203143694/G//T           | synonymous    | 1 | 0 |
| PLEKHA6   | chr1  | 204198072/T//C           | nonsynonymous | 1 | 0 |
| SIPA1L2   | chr1  | 232539282/T//G           | nonsynonymous | 1 | 0 |
| HEATR1    | chr1  | 236722353/T//A           | nonsynonymous | 1 | 0 |
| MYT1L     | chr2  | 1926897/G//A             | nonsynonymous | 1 | 0 |
| TRIB2     | chr2  | 12858505/C//T            | synonymous    | 1 | 0 |
| XDH       | chr2  | 31605932/C//T            | nonsynonymous | 1 | 0 |
| USP34     | chr2  | 61430340/A//C            | nonsynonymous | 1 | 0 |
| USP34     | chr2  | 61508331/A//T            | nonsynonymous | 1 | 0 |
| CD8B      | chr2  | 87080156/T//C            | nonsynonymous | 1 | 0 |

|           |      |                       |               |   |   |
|-----------|------|-----------------------|---------------|---|---|
| FAHD2A    | chr2 | 96078265/G//T         | nonsynonymous | 1 | 0 |
| NEB       | chr2 | 152359394/C//G        | nonsynonymous | 1 | 0 |
| SLC4A10   | chr2 | 162661003/A//C        | synonymous    | 1 | 0 |
| SP3       | chr2 | 174820795/G//A        | nonsynonymous | 1 | 0 |
| TTN       | chr2 | 179427848/C//G        | nonsynonymous | 1 | 0 |
|           | chr2 | 179611286/C//A        | synonymous    | 1 | 0 |
| FAM126B   | chr2 | 201881890/G//A        | synonymous    | 1 | 0 |
| STK36     | chr2 | 219544405/A//C        | nonsynonymous | 1 | 0 |
| INHA      | chr2 | 220439806/G//A        | nonsynonymous | 1 | 0 |
| CCDC140   | chr2 | 223168633/A//G        | synonymous    | 1 | 0 |
| AGXT      | chr2 | 241812394/A//T        | nonsynonymous | 1 | 0 |
| HDLBP     | chr2 | 242178175/T//C        | nonsynonymous | 1 | 0 |
| RTP5      | chr2 | 242813861/C//A        | synonymous    | 1 | 0 |
| OXTR      | chr3 | 8794826/A//G          | nonsynonymous | 1 | 0 |
| MKRN2     | chr3 | 12616509/A//C         | synonymous    | 1 | 0 |
| OSBPL10   | chr3 | 31703495/T//G         | synonymous    | 1 | 0 |
| CBLB      | chr3 | 105464755/T//C        | synonymous    | 1 | 0 |
| ACPP      | chr3 | 132075733/G//A        | synonymous    | 1 | 0 |
| UBA5      | chr3 | 132394127/T//C        | nonsynonymous | 1 | 0 |
| PIK3CB    | chr3 | 138409898/T//C        | synonymous    | 1 | 0 |
| AADAC     | chr3 | 151542572/A//G        | nonsynonymous | 1 | 0 |
| CCNL1     | chr3 | 156870949/T//C        | synonymous    | 1 | 0 |
| PIK3CA    | chr3 | 178938820/T//G        | nonsynonymous | 1 | 0 |
| ST6GAL1   | chr3 | 186793555/A//G        | synonymous    | 1 | 0 |
| HTT       | chr4 | 3216850/TG//T         | nonsynonymous | 1 | 0 |
| LGI2      | chr4 | 25005259/A//G         | synonymous    | 1 | 0 |
| KCTD8     | chr4 | 44176818/A//T         | nonsynonymous | 1 | 0 |
| GABRA4    | chr4 | 46976331/T//A         | nonsynonymous | 1 | 0 |
| GABRB1    | chr4 | 47408742/C//A         | synonymous    | 1 | 0 |
| G3BP2     | chr4 | 76580970/T//C         | nonsynonymous | 1 | 0 |
| INTS12    | chr4 | 106616701/T//C        | nonsynonymous | 1 | 0 |
| CASP6     | chr4 | 110612159/G//A        | nonsynonymous | 1 | 0 |
| NDNF      | chr4 | 121958433/C//A        | synonymous    | 1 | 0 |
| KIAA1109  | chr4 | 123130472/G//A        | nonsynonymous | 1 | 0 |
| FAT4      | chr4 | 126237623/A//G        | synonymous    | 1 | 0 |
| USP38     | chr4 | 144107113/G//C        | nonsynonymous | 1 | 0 |
| DCHS2     | chr4 | 155219570/C//A        | nonsynonymous | 1 | 0 |
| TRIML1    | chr4 | 189068532/G//A        | synonymous    | 1 | 0 |
| PLEKHG4B  | chr5 | 163580/C//T           | synonymous    | 1 | 0 |
| MYO10     | chr5 | 16704788/G//A         | nonsynonymous | 1 | 0 |
| CDH18     | chr5 | 19483592/G//A         | nonsynonymous | 1 | 0 |
| ADAMTS12  | chr5 | 33577021/C//A         | nonsynonymous | 1 | 0 |
| FYB       | chr5 | 39134971/G//T         | nonsynonymous | 1 | 0 |
| PDE4D     | chr5 | 58270553/C//T         | nonsynonymous | 1 | 0 |
| ERBIN     | chr5 | 65349449/A//G         | nonsynonymous | 1 | 0 |
| ZFYVE16   | chr5 | 79734549/A//G         | nonsynonymous | 1 | 0 |
| NUDT12    | chr5 | 102895068/C//A        | nonsynonymous | 1 | 0 |
| FBXL21    | chr5 | 135276980/T//G        | nonsynonymous | 1 | 0 |
| MATR3     | chr5 | 138661182/A//G        | synonymous    | 1 | 0 |
| PCDHA10   | chr5 | 140235829/G//A        | nonsynonymous | 1 | 0 |
| LARS      | chr5 | 145522462/T//C        | nonsynonymous | 1 | 0 |
| SAP30L    | chr5 | 153830666/A//G        | nonsynonymous | 1 | 0 |
| HIST1H2AI | chr6 | 27776373/G//A         | nonsynonymous | 1 | 0 |
| PKHD1     | chr6 | 51918830/A//T         | synonymous    | 1 | 0 |
| MLIP      | chr6 | 54095706/A//G         | synonymous    | 1 | 0 |
| COL12A1   | chr6 | 75862129/C//T         | nonsynonymous | 1 | 0 |
| PHIP      | chr6 | 79724813/ATCGTATTT//A | nonsynonymous | 1 | 0 |
| ASCC3     | chr6 | 101037865/G//A        | synonymous    | 1 | 0 |
| DCBLD1    | chr6 | 117841116/A//G        | synonymous    | 1 | 0 |
| OLIG3     | chr6 | 137814321/C//A        | synonymous    | 1 | 0 |
| PHACTR2   | chr6 | 144086809/G//T        | nonsynonymous | 1 | 0 |
| UTRN      | chr6 | 144774965/A//G        | synonymous    | 1 | 0 |
| SHPRH     | chr6 | 146275947/C//T        | nonsynonymous | 1 | 0 |
| LATS1     | chr6 | 150023144/T//C        | nonsynonymous | 1 | 0 |
| SYNE1     | chr6 | 152651876/C//T        | synonymous    | 1 | 0 |
| ARID1B    | chr6 | 157502151/G//A        | nonsynonymous | 1 | 0 |
| KIF25     | chr6 | 168440840/G//A        | nonsynonymous | 1 | 0 |
| CYTH3     | chr7 | 6210833/C//T          | nonsynonymous | 1 | 0 |
| KDELRL2   | chr7 | 6502790/C//T          | synonymous    | 1 | 0 |
| ZNF853    | chr7 | 6662206/G//A          | synonymous    | 1 | 0 |

|         |       |                          |               |   |   |
|---------|-------|--------------------------|---------------|---|---|
| ITGB8   | chr7  | 20444437/A/C             | nonsynonymous | 1 | 0 |
| ABC5    | chr7  | 20785017/G/T             | nonsynonymous | 1 | 0 |
| NT5C3A  | chr7  | 33057175/T/C             | nonsynonymous | 1 | 0 |
| AOAH    | chr7  | 36657899/A/T             | synonymous    | 1 | 0 |
|         | chr7  | 56146063/A/G             | synonymous    | 1 | 0 |
| ZNF479  | chr7  | 57199995/T/G             | nonsynonymous | 1 | 0 |
| ZNF107  | chr7  | 64167518/G/A             | nonsynonymous | 1 | 0 |
| ELN     | chr7  | 73477515/G/C             | nonsynonymous | 1 | 0 |
|         | chr7  | 77325692/C/A             | synonymous    | 1 | 0 |
| SEMA3A  | chr7  | 83739816/G/T             | nonsynonymous | 1 | 0 |
| ASB4    | chr7  | 95167057/G/A             | nonsynonymous | 1 | 0 |
| PDK4    | chr7  | 95221871/G/A             | nonsynonymous | 1 | 0 |
| MUC12   | chr7  | 100646679/C/A            | nonsynonymous | 1 | 0 |
| LRRN3   | chr7  | 110763252/T/G            | nonsynonymous | 1 | 0 |
| KCND2   | chr7  | 119915139/C/T            | synonymous    | 1 | 0 |
| PTPRZ1  | chr7  | 121653170/C/A            | nonsynonymous | 1 | 0 |
| PTPRZ1  | chr7  | 121684568/T/C            | synonymous    | 1 | 0 |
| OR9A2   | chr7  | 142723365/G/T            | synonymous    | 1 | 0 |
| NOBOX   | chr7  | 144101686/A/G            | nonsynonymous | 1 | 0 |
| FASTK   | chr7  | 150777875/A/G            | synonymous    | 1 | 0 |
| KMT2C   | chr7  | 151893062/T/A            | nonsynonymous | 1 | 0 |
| WRN     | chr8  | 31024662/C/A             | synonymous    | 1 | 0 |
| KCNU1   | chr8  | 36788626/T/G             | nonsynonymous | 1 | 0 |
| ZFH4    | chr8  | 77618721/C/T             | nonsynonymous | 1 | 0 |
| C8orf59 | chr8  | 86127149/C/G             | nonsynonymous | 1 | 0 |
| WWP1    | chr8  | 87392998/A/G             | synonymous    | 1 | 0 |
| PDP1    | chr8  | 94934602/T/A             | nonsynonymous | 1 | 0 |
| COL14A1 | chr8  | 121353588/C/T            | nonsynonymous | 1 | 0 |
| TG      | chr8  | 134034345/T/C            | nonsynonymous | 1 | 0 |
| PLEC    | chr8  | 144994909/G/A            | nonsynonymous | 1 | 0 |
| FREM1   | chr9  | 14842306/G/T             | synonymous    | 1 | 0 |
| FAM205A | chr9  | 34725101/A/G             | synonymous    | 1 | 0 |
| PHF24   | chr9  | 34971615/C/A             | nonsynonymous | 1 | 0 |
| TRIM14  | chr9  | 100854209/G/A            | nonsynonymous | 1 | 0 |
| PAPPA   | chr9  | 119115116/A/C            | nonsynonymous | 1 | 0 |
| GSN     | chr9  | 124091570/A/AT           | nonsynonymous | 1 | 0 |
| PSMB7   | chr9  | 127174706/T/C            | nonsynonymous | 1 | 0 |
| SNAPC4  | chr9  | 139272778/C/A            | synonymous    | 1 | 0 |
| C8G     | chr9  | 139841272/CGAGAGACGACCCC | synonymous    | 1 | 0 |
| SYT15   | chr10 | 46959958/G/A             | synonymous    | 1 | 0 |
| GPRIN2  | chr10 | 46999580/C/T             | synonymous    | 1 | 0 |
| SEC24C  | chr10 | 75529726/G/T             | nonsynonymous | 1 | 0 |
| IFIT3   | chr10 | 91098590/A/G             | nonsynonymous | 1 | 0 |
| HPS6    | chr10 | 103827404/C/T            | nonsynonymous | 1 | 0 |
| PPP2R2D | chr10 | 133761295/G/T            | nonsynonymous | 1 | 0 |
| TH      | chr11 | 2188190/A/T              | synonymous    | 1 | 0 |
| OR52B6  | chr11 | 5602809/G/A              | nonsynonymous | 1 | 0 |
| TRIM66  | chr11 | 8662298/T/C              | nonsynonymous | 1 | 0 |
| LGR4    | chr11 | 27389585/G/A             | synonymous    | 1 | 0 |
| KCNA4   | chr11 | 30034301/C/G             | synonymous    | 1 | 0 |
| FSHB    | chr11 | 30255173/G/A             | synonymous    | 1 | 0 |
| CAPRIN1 | chr11 | 34104392/T/G             | nonsynonymous | 1 | 0 |
| CAPRIN1 | chr11 | 34104398/GAGCAA/G        | nonsynonymous | 1 | 0 |
| OR8J3   | chr11 | 55904369/C/T             | nonsynonymous | 1 | 0 |
| OR10W1  | chr11 | 58034431/G/C             | nonsynonymous | 1 | 0 |
| OSBP    | chr11 | 59377855/T/C             | synonymous    | 1 | 0 |
| PC      | chr11 | 66633744/T/C             | nonsynonymous | 1 | 0 |
| MAML2   | chr11 | 95718774/T/C             | synonymous    | 1 | 0 |
| CASP1   | chr11 | 104900424/G/T            | nonsynonymous | 1 | 0 |
| ZBTB16  | chr11 | 114057727/G/T            | nonsynonymous | 1 | 0 |
| ABCG4   | chr11 | 119029322/T/G            | nonsynonymous | 1 | 0 |
| ETS1    | chr11 | 128332254/C/T            | synonymous    | 1 | 0 |
| NFRKB   | chr11 | 129739762/G/C            | nonsynonymous | 1 | 0 |
| NELL2   | chr12 | 45173751/G/T             | synonymous    | 1 | 0 |
| ARID2   | chr12 | 46215239/G/A             | nonsynonymous | 1 | 0 |
| METTL7B | chr12 | 56075563/C/G             | nonsynonymous | 1 | 0 |
| USP15   | chr12 | 62696638/A/T             | nonsynonymous | 1 | 0 |
| E2F7    | chr12 | 77423657/T/C             | nonsynonymous | 1 | 0 |
| NAV3    | chr12 | 78531101/G/A             | nonsynonymous | 1 | 0 |
| ACSS3   | chr12 | 81647185/G/A             | nonsynonymous | 1 | 0 |

|           |       |                           |               |   |   |
|-----------|-------|---------------------------|---------------|---|---|
| MTUS2     | chr13 | 29608132/G//A             | synonymous    | 1 | 0 |
| ALOX5AP   | chr13 | 31318290/C//T             | nonsynonymous | 1 | 0 |
| STARD13   | chr13 | 33685917/C//T             | nonsynonymous | 1 | 0 |
| COG6      | chr13 | 40254151/G//T             | synonymous    | 1 | 0 |
| TRIM13    | chr13 | 50586410/CTGATTTG//C      | nonsynonymous | 1 | 0 |
| ING1      | chr13 | 111372314/A//G            | synonymous    | 1 | 0 |
| ATP11AUN  | chr13 | 113333779/G//A            | nonsynonymous | 1 | 0 |
| OR4K17    | chr14 | 20586490/A//G             | nonsynonymous | 1 | 0 |
| PRMT5     | chr14 | 23392330/A//G             | nonsynonymous | 1 | 0 |
| ADCY4     | chr14 | 24795286/T//C             | nonsynonymous | 1 | 0 |
|           | chr14 | 24836150/T//A             | synonymous    | 1 | 0 |
| RPL10L    | chr14 | 47120838/A//G             | synonymous    | 1 | 0 |
| EXOC5     | chr14 | 57700583/C//T             | nonsynonymous | 1 | 0 |
| GPHN      | chr14 | 67576911/A//G             | nonsynonymous | 1 | 0 |
| AREL1     | chr14 | 75143399/T//A             | nonsynonymous | 1 | 0 |
| YLPM1     | chr14 | 75296002/C//A             | nonsynonymous | 1 | 0 |
| FLVCR2    | chr14 | 76088484/C//T             | synonymous    | 1 | 0 |
| TECPR2    | chr14 | 102916209/G//A            | synonymous    | 1 | 0 |
| NUTM1     | chr15 | 34649615/C//A             | synonymous    | 1 | 0 |
| MGA       | chr15 | 42058322/C//G             | nonsynonymous | 1 | 0 |
| TTBK2     | chr15 | 43075699/A//T             | nonsynonymous | 1 | 0 |
| NR2E3     | chr15 | 72110057/C//A             | synonymous    | 1 | 0 |
| LINGO1    | chr15 | 77907742/G//A             | synonymous    | 1 | 0 |
| AXIN1     | chr16 | 396701/C//A               | nonsynonymous | 1 | 0 |
| CHTF18    | chr16 | 839359/G//A               | nonsynonymous | 1 | 0 |
| TMC5      | chr16 | 19474624/A//T             | nonsynonymous | 1 | 0 |
| TMC5      | chr16 | 19481007/G//A             | nonsynonymous | 1 | 0 |
| IRX6      | chr16 | 55363194/T//C             | nonsynonymous | 1 | 0 |
| CES1      | chr16 | 55846808/T//C             | synonymous    | 1 | 0 |
| CNOT1     | chr16 | 58572083/CTGCTGCATATTAACC | nonsynonymous | 1 | 0 |
| PRPF8     | chr17 | 1561564/G//T              | nonsynonymous | 1 | 0 |
| ANKFY1    | chr17 | 4098475/G//C              | synonymous    | 1 | 0 |
| MYBBP1A   | chr17 | 4445767/G//A              | nonsynonymous | 1 | 0 |
| PIK3R6    | chr17 | 8722414/C//A              | nonsynonymous | 1 | 0 |
| MIEF2     | chr17 | 18166460/G//A             | nonsynonymous | 1 | 0 |
| ITGA3     | chr17 | 48149412/C//T             | nonsynonymous | 1 | 0 |
| ABCC3     | chr17 | 48750941/C//T             | nonsynonymous | 1 | 0 |
| MRPL58    | chr17 | 73017032/C//T             | nonsynonymous | 1 | 0 |
| DNAH17    | chr17 | 76433845/C//T             | nonsynonymous | 1 | 0 |
| FASN      | chr17 | 80041677/T//A             | nonsynonymous | 1 | 0 |
| EMILIN2   | chr18 | 2906882/G//T              | nonsynonymous | 1 | 0 |
| SLC14A2   | chr18 | 43262357/C//A             | nonsynonymous | 1 | 0 |
| C18orf54  | chr18 | 51904564/G//T             | nonsynonymous | 1 | 0 |
| CDH19     | chr18 | 64172185/G//C             | nonsynonymous | 1 | 0 |
| NETO1     | chr18 | 70534561/T//G             | synonymous    | 1 | 0 |
| BTBD2     | chr19 | 1986890/A//G              | nonsynonymous | 1 | 0 |
| MFSD12    | chr19 | 3546099/A//G              | nonsynonymous | 1 | 0 |
| XAB2      | chr19 | 7684701/T//C              | nonsynonymous | 1 | 0 |
| KANK3     | chr19 | 8399566/G//A              | nonsynonymous | 1 | 0 |
| ZNF562    | chr19 | 9763883/T//G              | synonymous    | 1 | 0 |
| SMARCA4   | chr19 | 11118636/A//C             | nonsynonymous | 1 | 0 |
| ADGRL1    | chr19 | 14261661/C//T             | synonymous    | 1 | 0 |
| CPAMD8    | chr19 | 17003920/T//A             | nonsynonymous | 1 | 0 |
| MPV17L2   | chr19 | 18304161/G//A             | nonsynonymous | 1 | 0 |
| ZNF91     | chr19 | 23544243/G//C             | nonsynonymous | 1 | 0 |
| ZNF790    | chr19 | 37310406/T//C             | synonymous    | 1 | 0 |
| ARHGEF1   | chr19 | 42402706/A//C             | nonsynonymous | 1 | 0 |
| IGFL3     | chr19 | 46623521/C//T             | synonymous    | 1 | 0 |
| LHB       | chr19 | 49519484/G//T             | synonymous    | 1 | 0 |
| KIR2DL3   | chr19 | 55255249/A//C             | nonsynonymous | 1 | 0 |
| KIR3DL1   | chr19 | 55340910/C//A             | synonymous    | 1 | 0 |
| PLCB4     | chr20 | 9353031/G//A              | nonsynonymous | 1 | 0 |
| OTOR      | chr20 | 16730650/A//G             | nonsynonymous | 1 | 0 |
|           | chr20 | 25059434/C//T             | synonymous    | 1 | 0 |
| ACTR5     | chr20 | 37377146/C//A             | nonsynonymous | 1 | 0 |
| EPPIN     | chr20 | 44170712/C//T             | synonymous    | 1 | 0 |
| DIDO1     | chr20 | 61525473/G//C             | nonsynonymous | 1 | 0 |
| CHRNA4    | chr20 | 61981681/G//A             | nonsynonymous | 1 | 0 |
| KRTAP19-5 | chr21 | 31874308/C//A             | nonsynonymous | 1 | 0 |
| PDE9A     | chr21 | 44180955/T//C             | synonymous    | 1 | 0 |

|                |       |                  |               |   |   |
|----------------|-------|------------------|---------------|---|---|
| APOBEC3G       | chr22 | 39474935/A//G    | nonsynonymous | 1 | 0 |
| MID1           | chrX  | 10427814/A//G    | nonsynonymous | 1 | 0 |
| GPR173         | chrX  | 53105924/G//A    | nonsynonymous | 1 | 0 |
| RAP1GAP        | chr1  | 21926095/C//T    | synonymous    | 1 | 0 |
| TGFBR3         | chr1  | 92177963/A//T    | nonsynonymous | 1 | 0 |
| PPM1J          | chr1  | 113253206/CAT//C | nonsynonymous | 1 | 0 |
| HRNR           | chr1  | 152191036/G//C   | nonsynonymous | 1 | 0 |
| CD1D           | chr1  | 158150868/C//T   | synonymous    | 1 | 0 |
| TNN            | chr1  | 175105000/C//T   | nonsynonymous | 1 | 0 |
| HHIPL2         | chr1  | 222717148/G//A   | synonymous    | 1 | 0 |
| KIF26B         | chr1  | 245849839/A//G   | nonsynonymous | 1 | 0 |
| DNAJC5G        | chr2  | 27500791/G//A    | nonsynonymous | 1 | 0 |
| LYG1           | chr2  | 99907840/G//A    | nonsynonymous | 1 | 0 |
| LRP1B          | chr2  | 141819833/G//T   | nonsynonymous | 1 | 0 |
| ACVR2A         | chr2  | 148674858/C//T   | nonsynonymous | 1 | 0 |
| SCN2A          | chr2  | 166245293/G//A   | synonymous    | 1 | 0 |
| SP3            | chr2  | 174820146/G//C   | nonsynonymous | 1 | 0 |
| GTF3C3         | chr2  | 197637794/G//C   | nonsynonymous | 1 | 0 |
| TGFBR2         | chr3  | 30713868/T//C    | nonsynonymous | 1 | 0 |
| ALCAM          | chr3  | 105266044/G//A   | nonsynonymous | 1 | 0 |
| DDIT4L         | chr4  | 101111145/A//G   | synonymous    | 1 | 0 |
|                | chr4  | 155411350/G//A   | synonymous    | 1 | 0 |
| GALNTL6        | chr4  | 173730640/C//T   | synonymous    | 1 | 0 |
| IRX1           | chr5  | 3600357/G//A     | nonsynonymous | 1 | 0 |
| ADGRV1         | chr5  | 90087079/G//A    | synonymous    | 1 | 0 |
| PCDHA1         | chr5  | 140166590/G//A   | nonsynonymous | 1 | 0 |
| PCDHA2         | chr5  | 140175828/G//A   | nonsynonymous | 1 | 0 |
| ZNF879         | chr5  | 178460035/C//T   | synonymous    | 1 | 0 |
| SLC44A4        | chr6  | 31844858/C//T    | synonymous    | 1 | 0 |
| HLA-DRA        | chr6  | 32411192/G//A    | nonsynonymous | 1 | 0 |
| COL19A1        | chr6  | 70637867/C//T    | synonymous    | 1 | 0 |
| KCNQ5          | chr6  | 73332284/C//T    | nonsynonymous | 1 | 0 |
| SYNE1          | chr6  | 152623032/G//T   | nonsynonymous | 1 | 0 |
| ELFN1          | chr7  | 1784761/G//A     | nonsynonymous | 1 | 0 |
| ABCB1          | chr7  | 87145863/G//C    | nonsynonymous | 1 | 0 |
| SND1           | chr7  | 127714722/G//A   | nonsynonymous | 1 | 0 |
| PRKDC          | chr8  | 48775012/G//A    | synonymous    | 1 | 0 |
| EIF3E          | chr8  | 109214012/C//T   | synonymous    | 1 | 0 |
| GABBR2         | chr9  | 101258693/A//G   | nonsynonymous | 1 | 0 |
| EPB41L4B       | chr9  | 111962597/C//T   | nonsynonymous | 1 | 0 |
| ZNF483         | chr9  | 114304274/C//T   | synonymous    | 1 | 0 |
| ADARB2         | chr10 | 1405582/G//A     | nonsynonymous | 1 | 0 |
| ANKRD30A       | chr10 | 37490212/C//A    | nonsynonymous | 1 | 0 |
| AP3M1          | chr10 | 75888956/C//T    | nonsynonymous | 1 | 0 |
| CYP2C9         | chr10 | 96707529/T//C    | synonymous    | 1 | 0 |
| CHRM4          | chr11 | 46406942/C//T    | nonsynonymous | 1 | 0 |
| TENM4          | chr11 | 78383362/T//G    | nonsynonymous | 1 | 0 |
| ACVR1B         | chr12 | 52385715/C//T    | nonsynonymous | 1 | 0 |
| ANKS1B         | chr12 | 99223050/C//T    | nonsynonymous | 1 | 0 |
| VPS33A         | chr12 | 122716852/T//C   | nonsynonymous | 1 | 0 |
| CCDC169-SOHLH2 | chr13 | 36827942/G//A    | nonsynonymous | 1 | 0 |
| PROZ           | chr13 | 113814357/G//A   | nonsynonymous | 1 | 0 |
| AHNAK2         | chr14 | 105413431/G//A   | nonsynonymous | 1 | 0 |
| CPPED1         | chr16 | 12798612/C//T    | nonsynonymous | 1 | 0 |
| CACNG3         | chr16 | 24268054/G//A    | synonymous    | 1 | 0 |
| HYDIN          | chr16 | 70928403/G//A    | nonsynonymous | 1 | 0 |
| ASGR1          | chr17 | 7076867/C//T     | synonymous    | 1 | 0 |
| KCNAB3         | chr17 | 7829392/T//C     | nonsynonymous | 1 | 0 |
| USP43          | chr17 | 9549164/C//T     | nonsynonymous | 1 | 0 |
| MYOCD          | chr17 | 12656357/A//G    | synonymous    | 1 | 0 |
| ZNF345         | chr19 | 37368165/C//T    | nonsynonymous | 1 | 0 |
| ASPDH          | chr19 | 51015728/C//T    | nonsynonymous | 1 | 0 |
| ZIM3           | chr19 | 57648246/C//T    | nonsynonymous | 1 | 0 |
| NFATC2         | chr20 | 50133423/C//T    | nonsynonymous | 1 | 0 |
| TMEM50B        | chr21 | 34839420/C//T    | nonsynonymous | 1 | 0 |
| COL18A1        | chr21 | 46893834/G//A    | nonsynonymous | 1 | 0 |
| CCT8L2         | chr22 | 17072750/G//T    | nonsynonymous | 1 | 0 |
| ZNF74          | chr22 | 20760049/C//T    | synonymous    | 1 | 0 |
| TCEAL7         | chrX  | 102586377/G//A   | nonsynonymous | 0 | 1 |
| NCOA1          | chr2  | 24964684/G//A    | nonsynonymous | 0 | 1 |

|          |       |                |               |   |   |
|----------|-------|----------------|---------------|---|---|
| UPP2     | chr2  | 158962710/A//G | synonymous    | 0 | 1 |
| SCN5A    | chr3  | 38639246/C//T  | nonsynonymous | 0 | 1 |
|          | chr3  | 120320116/G//A | synonymous    | 0 | 1 |
| EIF2AK1  | chr7  | 6064327/C//T   | nonsynonymous | 0 | 1 |
| ADCY1    | chr7  | 45632384/C//T  | synonymous    | 0 | 1 |
| SEMA3A   | chr7  | 83592562/A//G  | nonsynonymous | 0 | 1 |
| DAPK1    | chr9  | 90301509/G//T  | synonymous    | 0 | 1 |
| ABL1     | chr9  | 133760290/G//A | synonymous    | 0 | 1 |
| MYOD1    | chr11 | 17741935/G//A  | nonsynonymous | 0 | 1 |
| P2RY6    | chr11 | 73007645/C//A  | nonsynonymous | 0 | 1 |
| WDR66    | chr12 | 122372196/G//A | nonsynonymous | 0 | 1 |
| DCLK1    | chr13 | 36413299/G//A  | synonymous    | 0 | 1 |
| SEMA6D   | chr15 | 48055259/C//A  | nonsynonymous | 0 | 1 |
| LINGO1   | chr15 | 77924660/C//A  | synonymous    | 0 | 1 |
| CDRT1    | chr17 | 15498181/A//G  | synonymous    | 0 | 1 |
| ABCA10   | chr17 | 67152056/G//A  | nonsynonymous | 0 | 1 |
| CCDC40   | chr17 | 78039323/C//T  | nonsynonymous | 0 | 1 |
|          | chr18 | 53177850/C//A  | synonymous    | 0 | 1 |
| PTBP1    | chr19 | 806496/C//A    | synonymous    | 0 | 1 |
| CHERP    | chr19 | 16640558/T//C  | nonsynonymous | 0 | 1 |
| NWD1     | chr19 | 16908672/C//T  | nonsynonymous | 0 | 1 |
| VPS16    | chr20 | 2843343/A//G   | nonsynonymous | 0 | 1 |
| SLC13A3  | chr20 | 45194969/C//T  | nonsynonymous | 0 | 1 |
| GNAS     | chr20 | 57429282/C//T  | nonsynonymous | 0 | 1 |
| ITSN1    | chr21 | 35122472/C//T  | nonsynonymous | 0 | 1 |
| EFCAB6   | chr22 | 44004440/C//T  | nonsynonymous | 0 | 1 |
| C1orf112 | chr1  | 169772447/T//C | synonymous    | 0 | 1 |
| ASPM     | chr1  | 197053560/T//G | synonymous    | 0 | 1 |
| GAD1     | chr2  | 171716307/G//A | nonsynonymous | 0 | 1 |
| OR5K4    | chr3  | 98073598/A//T  | nonsynonymous | 0 | 1 |
| PROM1    | chr4  | 15993865/C//G  | synonymous    | 0 | 1 |
| GRXCR1   | chr4  | 42964930/T//G  | nonsynonymous | 0 | 1 |
| FAT4     | chr4  | 126372924/G//T | nonsynonymous | 0 | 1 |
| TCTE1    | chr6  | 44250201/C//A  | nonsynonymous | 0 | 1 |
| ESYT2    | chr7  | 158536268/G//C | synonymous    | 0 | 1 |
| VCPIP1   | chr8  | 67578208/G//A  | nonsynonymous | 0 | 1 |
| CA3      | chr8  | 86351091/C//T  | synonymous    | 0 | 1 |
| DMRTA1   | chr9  | 22447686/C//A  | nonsynonymous | 0 | 1 |
| GLYATL2  | chr11 | 58604803/A//C  | nonsynonymous | 0 | 1 |
| ACTR10   | chr14 | 58666924/T//C  | synonymous    | 0 | 1 |
| TGM5     | chr15 | 43552656/G//C  | nonsynonymous | 0 | 1 |
| ZNF441   | chr19 | 11892301/T//A  | synonymous    | 0 | 1 |
| ZNF626   | chr19 | 20808090/C//T  | nonsynonymous | 0 | 1 |
| MAG      | chr19 | 35804233/T//G  | nonsynonymous | 0 | 1 |
| SNX21    | chr20 | 44469833/C//T  | nonsynonymous | 0 | 1 |
| DSCAM    | chr21 | 41385160/G//A  | nonsynonymous | 0 | 1 |
| NLGN4X   | chrX  | 5821363/G//A   | synonymous    | 0 | 1 |
| GOSR2    | chr17 | 45016000/G//A  | nonsynonymous | 1 | 0 |
| SLC6A9   | chr1  | 44468651/G//A  | synonymous    | 0 | 1 |
| TTC22    | chr1  | 55253451/C//G  | synonymous    | 0 | 1 |
| NEGR1    | chr1  | 71873119/G//T  | synonymous    | 0 | 1 |
| CNN3     | chr1  | 95369022/A//G  | nonsynonymous | 0 | 1 |
| CNN3     | chr1  | 95369027/T//G  | nonsynonymous | 0 | 1 |
| OVGP1    | chr1  | 111966175/A//C | nonsynonymous | 0 | 1 |
| POLR3GL  | chr1  | 145456556/T//C | synonymous    | 0 | 1 |
| PRPF3    | chr1  | 150297379/A//G | synonymous    | 0 | 1 |
| MCL1     | chr1  | 150551489/T//G | nonsynonymous | 0 | 1 |
| FAM63A   | chr1  | 150974744/T//G | nonsynonymous | 0 | 1 |
| LCE1C    | chr1  | 152777810/C//T | nonsynonymous | 0 | 1 |
| TTC24    | chr1  | 156553164/T//C | synonymous    | 0 | 1 |
| ITLN2    | chr1  | 160914970/C//T | nonsynonymous | 0 | 1 |
| NECTIN4  | chr1  | 161047389/G//A | nonsynonymous | 0 | 1 |
| B3GALT2  | chr1  | 193149682/C//G | nonsynonymous | 0 | 1 |
| KCNT2    | chr1  | 196227479/C//T | nonsynonymous | 0 | 1 |
| TNNI1    | chr1  | 201380612/C//T | nonsynonymous | 0 | 1 |
| GPR37L1  | chr1  | 202097037/C//G | nonsynonymous | 0 | 1 |
|          | chr1  | 207647068/T//A | synonymous    | 0 | 1 |
| LAMB3    | chr1  | 209796462/G//A | synonymous    | 0 | 1 |
| DNAH14   | chr1  | 225380529/A//G | synonymous    | 0 | 1 |
| LGALS8   | chr1  | 236711334/G//C | nonsynonymous | 0 | 1 |

|          |       |                           |               |   |   |
|----------|-------|---------------------------|---------------|---|---|
| ZBTB18   | chr1  | 244217391/C//T            | synonymous    | 0 | 1 |
| CPSF3    | chr2  | 9595791/A//G              | nonsynonymous | 0 | 1 |
| FSHR     | chr2  | 49190145/G//T             | synonymous    | 0 | 1 |
| XPO1     | chr2  | 61719336/A//G             | synonymous    | 0 | 1 |
| MDH1     | chr2  | 63831910/AGATGTCAACCATGCC | nonsynonymous | 0 | 1 |
| UGP2     | chr2  | 64109643/A//G             | nonsynonymous | 0 | 1 |
| SPRED2   | chr2  | 65540606/G//T             | synonymous    | 0 | 1 |
| NAT8     | chr2  | 73868065/A//G             | synonymous    | 0 | 1 |
| M1AP     | chr2  | 74802564/C//A             | nonsynonymous | 0 | 1 |
| IL36RN   | chr2  | 113820246/T//A            | nonsynonymous | 0 | 1 |
| GLI2     | chr2  | 121740424/G//A            | nonsynonymous | 0 | 1 |
| CNTNAP5  | chr2  | 125262123/A//C            | nonsynonymous | 0 | 1 |
| LRP1B    | chr2  | 141747096/T//C            | synonymous    | 0 | 1 |
| EVX2     | chr2  | 176948149/T//C            | nonsynonymous | 0 | 1 |
| SESTD1   | chr2  | 180036872/T//C            | nonsynonymous | 0 | 1 |
| SLC39A10 | chr2  | 196578267/G//T            | nonsynonymous | 0 | 1 |
| ZDBF2    | chr2  | 207174720/T//C            | nonsynonymous | 0 | 1 |
| NYAP2    | chr2  | 226446713/A//T            | nonsynonymous | 0 | 1 |
| PER2     | chr2  | 239185818/G//C            | nonsynonymous | 0 | 1 |
| CNTN4    | chr3  | 2942394/A//G              | nonsynonymous | 0 | 1 |
| ITPR1    | chr3  | 4715942/T//C              | nonsynonymous | 0 | 1 |
| COL7A1   | chr3  | 48619778/C//T             | nonsynonymous | 0 | 1 |
| ALAS1    | chr3  | 52238813/A//G             | nonsynonymous | 0 | 1 |
| OR5H14   | chr3  | 97868282/T//C             | nonsynonymous | 0 | 1 |
| MORC1    | chr3  | 108682402/C//A            | nonsynonymous | 0 | 1 |
| TMEM39A  | chr3  | 119166009/G//A            | nonsynonymous | 0 | 1 |
| CDV3     | chr3  | 133306883/A//C            | nonsynonymous | 0 | 1 |
| PCCB     | chr3  | 135969227/G//A            | nonsynonymous | 0 | 1 |
| PARM1    | chr4  | 75938176/C//T             | synonymous    | 0 | 1 |
| PAQR3    | chr4  | 79860197/T//C             | nonsynonymous | 0 | 1 |
| PPM1K    | chr4  | 89189435/G//A             | synonymous    | 0 | 1 |
| GIMD1    | chr4  | 107288544/T//A            | nonsynonymous | 0 | 1 |
| KIAA1109 | chr4  | 123132101/A//G            | nonsynonymous | 0 | 1 |
| NEIL3    | chr4  | 178274584/A//G            | nonsynonymous | 0 | 1 |
| MYO10    | chr5  | 16783559/T//C             | nonsynonymous | 0 | 1 |
| POU5F2   | chr5  | 93076379/C//G             | synonymous    | 0 | 1 |
| CEP120   | chr5  | 122726952/T//G            | nonsynonymous | 0 | 1 |
| P4HA2    | chr5  | 131544986/A//G            | nonsynonymous | 0 | 1 |
| EGR1     | chr5  | 137802935/TGGGCAC//T      | nonsynonymous | 0 | 1 |
| PCDHA5   | chr5  | 140201924/G//T            | synonymous    | 0 | 1 |
| PCDHGA9  | chr5  | 140783648/G//A            | nonsynonymous | 0 | 1 |
| NEURL1B  | chr5  | 172113924/C//A            | nonsynonymous | 0 | 1 |
| UIMC1    | chr5  | 176335648/T//C            | nonsynonymous | 0 | 1 |
| KIF6     | chr6  | 39554139/A//G             | synonymous    | 0 | 1 |
| NT5DC1   | chr6  | 116559361/T//C            | synonymous    | 0 | 1 |
| DSE      | chr6  | 116756855/A//G            | synonymous    | 0 | 1 |
| MED23    | chr6  | 131915454/T//C            | nonsynonymous | 0 | 1 |
| PLEKHG1  | chr6  | 151140857/C//T            | nonsynonymous | 0 | 1 |
| SYNE1    | chr6  | 152589249/T//A            | nonsynonymous | 0 | 1 |
| SYNE1    | chr6  | 152605274/C//T            | nonsynonymous | 0 | 1 |
| GTF2I    | chr7  | 74103545/C//A             | nonsynonymous | 0 | 1 |
| AKAP9    | chr7  | 91631315/T//C             | nonsynonymous | 0 | 1 |
| AKAP9    | chr7  | 91631686/G//T             | nonsynonymous | 0 | 1 |
| PNPLA8   | chr7  | 108155949/T//C            | synonymous    | 0 | 1 |
| KCND2    | chr7  | 120382567/T//G            | nonsynonymous | 0 | 1 |
| PPP1R3B  | chr8  | 8998625/G//A              | synonymous    | 0 | 1 |
| BMP1     | chr8  | 22067193/C//T             | synonymous    | 0 | 1 |
| SCARA3   | chr8  | 27516840/T//G             | nonsynonymous | 0 | 1 |
| WHSC1L1  | chr8  | 38189101/C//T             | nonsynonymous | 0 | 1 |
| TACC1    | chr8  | 38704209/A//G             | synonymous    | 0 | 1 |
| RUNX1T1  | chr8  | 92972502/T//A             | nonsynonymous | 0 | 1 |
| CSMD3    | chr8  | 113395876/A//G            | nonsynonymous | 0 | 1 |
| FBXO10   | chr9  | 37541515/G//A             | nonsynonymous | 0 | 1 |
| C9orf84  | chr9  | 114518636/A//G            | synonymous    | 0 | 1 |
| CNTRL    | chr9  | 123852559/A//C            | nonsynonymous | 0 | 1 |
| MVB12B   | chr9  | 129157855/G//C            | nonsynonymous | 0 | 1 |
| STXBP1   | chr9  | 130440726/G//A            | nonsynonymous | 0 | 1 |
| NUP214   | chr9  | 134003760/A//T            | nonsynonymous | 0 | 1 |
| ADARB2   | chr10 | 1405598/G//A              | synonymous    | 0 | 1 |
| PTCHD3   | chr10 | 27702722/C//T             | nonsynonymous | 0 | 1 |

|           |       |                           |               |   |   |
|-----------|-------|---------------------------|---------------|---|---|
| HNRNPF    | chr10 | 43883256/T//A             | nonsynonymous | 0 | 1 |
| WDFY4     | chr10 | 50178223/C//A             | nonsynonymous | 0 | 1 |
| IPMK      | chr10 | 59956282/T//C             | nonsynonymous | 0 | 1 |
| MARCH5    | chr10 | 94100524/G//C             | nonsynonymous | 0 | 1 |
| TWNK      | chr10 | 102753231/T//C            | synonymous    | 0 | 1 |
| PNLIPRP2  | chr10 | 118389533/T//C            | synonymous    | 0 | 1 |
| STIM1     | chr11 | 4080549/T//G              | nonsynonymous | 0 | 1 |
| CHRM4     | chr11 | 46407567/G//T             | nonsynonymous | 0 | 1 |
| OR4B1     | chr11 | 48238811/C//A             | synonymous    | 0 | 1 |
| ZNHIT2    | chr11 | 64884416/A//T             | nonsynonymous | 0 | 1 |
| PCNX3     | chr11 | 65386027/G//A             | synonymous    | 0 | 1 |
| SNX32     | chr11 | 65617471/C//T             | synonymous    | 0 | 1 |
| P2RY6     | chr11 | 73007987/C//T             | nonsynonymous | 0 | 1 |
| NDUFC2    | chr11 | 77780913/T//C             | synonymous    | 0 | 1 |
| NPAT      | chr11 | 108031685/A//C            | nonsynonymous | 0 | 1 |
| ANKK1     | chr11 | 113270877/T//C            | nonsynonymous | 0 | 1 |
| ZW10      | chr11 | 113618296/G//A            | nonsynonymous | 0 | 1 |
| KMT2A     | chr11 | 118375389/C//G            | nonsynonymous | 0 | 1 |
| USP2      | chr11 | 119227465/G//T            | synonymous    | 0 | 1 |
| TAS2R14   | chr12 | 11091650/T//A             | nonsynonymous | 0 | 1 |
| GRIN2B    | chr12 | 14018891/G//A             | synonymous    | 0 | 1 |
| ABCC9     | chr12 | 22065941/A//T             | synonymous    | 0 | 1 |
| ITPR2     | chr12 | 26810988/T//C             | synonymous    | 0 | 1 |
| CAPRIN2   | chr12 | 30886650/C//T             | synonymous    | 0 | 1 |
| PDZRN4    | chr12 | 41946547/T//C             | synonymous    | 0 | 1 |
| KMT2D     | chr12 | 49431603/GTGTGCCCACTGCTAC | nonsynonymous | 0 | 1 |
| LRP1      | chr12 | 57548002/A//C             | nonsynonymous | 0 | 1 |
| SLC6A15   | chr12 | 85285643/C//A             | nonsynonymous | 0 | 1 |
| RFX4      | chr12 | 107155328/A//G            | synonymous    | 0 | 1 |
| PXN       | chr12 | 120650213/G//A            | synonymous    | 0 | 1 |
| BCL7A     | chr12 | 122473296/G//A            | synonymous    | 0 | 1 |
| ATP12A    | chr13 | 25265349/T//C             | synonymous    | 0 | 1 |
| AKAP11    | chr13 | 42875389/T//G             | nonsynonymous | 0 | 1 |
| THSD1     | chr13 | 52951857/C//A             | nonsynonymous | 0 | 1 |
| PCDH8     | chr13 | 53418649/G//C             | synonymous    | 0 | 1 |
| HEATR4    | chr14 | 73976045/C//T             | nonsynonymous | 0 | 1 |
| SLTM      | chr15 | 59205695/G//T             | synonymous    | 0 | 1 |
| GLCE      | chr15 | 69560957/G//T             | nonsynonymous | 0 | 1 |
| AXIN1     | chr16 | 396763/G//T               | nonsynonymous | 0 | 1 |
| CDR2      | chr16 | 22360605/GAGGTCAT//G      | nonsynonymous | 0 | 1 |
| NLRC5     | chr16 | 57089415/G//C             | nonsynonymous | 0 | 1 |
| CDH1      | chr16 | 68845623/A//G             | nonsynonymous | 0 | 1 |
| NCBP3     | chr17 | 3729422/C//T              | nonsynonymous | 0 | 1 |
| ENO3      | chr17 | 4860301/A//G              | nonsynonymous | 0 | 1 |
| PER1      | chr17 | 8046759/G//C              | nonsynonymous | 0 | 1 |
| SYNRG     | chr17 | 35969356/T//C             | synonymous    | 0 | 1 |
| GHDC      | chr17 | 40344303/C//T             | nonsynonymous | 0 | 1 |
| HSF5      | chr17 | 56536272/C//A             | nonsynonymous | 0 | 1 |
| MRC2      | chr17 | 60755949/A//T             | nonsynonymous | 0 | 1 |
| SMARCD2   | chr17 | 61911059/T//C             | nonsynonymous | 0 | 1 |
| FASN      | chr17 | 80042164/AGGCCCTTGCCAG//A | nonsynonymous | 0 | 1 |
| ANKRD12   | chr18 | 9254363/T//A              | nonsynonymous | 0 | 1 |
|           | chr18 | 47793937/A//C             | synonymous    | 0 | 1 |
| SOCS6     | chr18 | 67992714/C//G             | nonsynonymous | 0 | 1 |
| MUC16     | chr19 | 8976852/A//G              | nonsynonymous | 0 | 1 |
| S1PR2     | chr19 | 10334909/C//T             | nonsynonymous | 0 | 1 |
| CD22      | chr19 | 35832264/G//T             | nonsynonymous | 0 | 1 |
| ZNF420    | chr19 | 37618988/T//A             | nonsynonymous | 0 | 1 |
| FCGBP     | chr19 | 40430515/G//A             | synonymous    | 0 | 1 |
| PSG1      | chr19 | 43383826/T//C             | synonymous    | 0 | 1 |
|           | chr19 | 50985156/C//T             | synonymous    | 0 | 1 |
| SIGLEC7   | chr19 | 51645997/G//A             | nonsynonymous | 0 | 1 |
| SIGLEC10  | chr19 | 51919408/C//T             | synonymous    | 0 | 1 |
| RDH13     | chr19 | 55574430/G//GCCGTCCA      | synonymous    | 0 | 1 |
| GGT7      | chr20 | 33440236/C//G             | nonsynonymous | 0 | 1 |
| EIF6      | chr20 | 33867456/T//C             | nonsynonymous | 0 | 1 |
| KRTAP15-1 | chr21 | 31812786/C//A             | synonymous    | 0 | 1 |
| URB1      | chr21 | 33692938/C//T             | nonsynonymous | 0 | 1 |
| COL18A1   | chr21 | 46907378/C//T             | synonymous    | 0 | 1 |
| COL6A2    | chr21 | 47531377/C//T             | synonymous    | 0 | 1 |



|          |       |                     |               |   |   |
|----------|-------|---------------------|---------------|---|---|
| IL17RA   | chr22 | 17590288/C//T       | nonsynonymous | 0 | 1 |
| AIFM3    | chr22 | 21333960/G//C       | nonsynonymous | 0 | 1 |
| INPP5J   | chr22 | 31530083/G//A       | nonsynonymous | 0 | 1 |
| SLC5A4   | chr22 | 32621797/G//A       | synonymous    | 0 | 1 |
| CSF2RB   | chr22 | 37334020/G//A       | nonsynonymous | 0 | 1 |
| PLXNB2   | chr22 | 50719802/C//CA      | nonsynonymous | 0 | 1 |
| XAGE3    | chrX  | 52891672/A//G       | synonymous    | 0 | 1 |
| RNF103   | chr2  | 86850964/G//A       | synonymous    | 0 | 1 |
| SOX14    | chr3  | 137484242/G//A      | nonsynonymous | 0 | 1 |
| ADGRL3   | chr4  | 62903477/G//A       | nonsynonymous | 0 | 1 |
| C1QTNF2  | chr5  | 159776485/G//A      | nonsynonymous | 0 | 1 |
| MGAT1    | chr5  | 180219379/C//T      | nonsynonymous | 0 | 1 |
| FGD2     | chr6  | 36995888/G//A       | synonymous    | 0 | 1 |
| HTR1B    | chr6  | 78172108/G//A       | nonsynonymous | 0 | 1 |
| TPD52L1  | chr6  | 125550289/G//A      | nonsynonymous | 0 | 1 |
| VNN1     | chr6  | 133004380/C//A      | nonsynonymous | 0 | 1 |
| SCARA5   | chr8  | 27779322/G//A       | nonsynonymous | 0 | 1 |
| TRAPPC9  | chr8  | 141297751/G//A      | nonsynonymous | 0 | 1 |
| TLN1     | chr9  | 35704070/G//A       | nonsynonymous | 0 | 1 |
| TRPM6    | chr9  | 77427326/C//T       | nonsynonymous | 0 | 1 |
| SUSD1    | chr9  | 114886681/C//T      | nonsynonymous | 0 | 1 |
| MUC5B    | chr11 | 1270557/C//T        | synonymous    | 0 | 1 |
| KCNA4    | chr11 | 30032744/A//G       | synonymous    | 0 | 1 |
| MAPK8IP1 | chr11 | 45921897/G//T       | nonsynonymous | 0 | 1 |
| LRP5     | chr11 | 68171070/C//T       | synonymous    | 0 | 1 |
| NXPE2    | chr11 | 114568959/G//C      | nonsynonymous | 0 | 1 |
| RIMKLB   | chr12 | 8902672/G//A        | synonymous    | 0 | 1 |
| C12orf49 | chr12 | 117160940/T//C      | nonsynonymous | 0 | 1 |
| DHRS4L2  | chr14 | 24459534/GGAAGGC//G | nonsynonymous | 0 | 1 |
| RTL1     | chr14 | 101348991/G//A      | nonsynonymous | 0 | 1 |
| NDN      | chr15 | 23931940/C//T       | nonsynonymous | 0 | 1 |
| PDIA3    | chr15 | 44038837/A//G       | nonsynonymous | 0 | 1 |
| PRTG     | chr15 | 55912900/C//A       | nonsynonymous | 0 | 1 |
| PRTG     | chr15 | 55930816/C//T       | nonsynonymous | 0 | 1 |
| MFSD6L   | chr17 | 8701134/C//T        | synonymous    | 0 | 1 |
| NMT1     | chr17 | 43174608/G//A       | nonsynonymous | 0 | 1 |
| ACSF2    | chr17 | 48548428/G//A       | nonsynonymous | 0 | 1 |
| MVB12A   | chr19 | 17530890/C//T       | synonymous    | 0 | 1 |
| ZCCHC3   | chr20 | 278893/G//A         | synonymous    | 0 | 1 |
| SLC7A3   | chrX  | 70147847/G//A       | nonsynonymous | 0 | 1 |
| PADI3    | chr1  | 17607298/G//A       | synonymous    | 1 | 0 |
| MROH7    | chr1  | 55139784/C//T       | synonymous    | 1 | 0 |
| AMPD1    | chr1  | 115231253/C//T      | synonymous    | 1 | 0 |
| CTSK     | chr1  | 150776511/G//A      | nonsynonymous | 1 | 0 |
| CACNA1E  | chr1  | 181727217/C//T      | synonymous    | 1 | 0 |
| RYR2     | chr1  | 237994867/T//C      | nonsynonymous | 1 | 0 |
| RGS7     | chr1  | 241146429/C//G      | nonsynonymous | 1 | 0 |
| GREB1    | chr2  | 11758702/C//T       | nonsynonymous | 1 | 0 |
| LAPTM4A  | chr2  | 20240691/C//T       | nonsynonymous | 1 | 0 |
| ASTL     | chr2  | 96801125/T//G       | nonsynonymous | 1 | 0 |
| SLC9A4   | chr2  | 103120148/A//G      | nonsynonymous | 1 | 0 |
|          | chr2  | 219137525/C//T      | synonymous    | 1 | 0 |
| CCDC13   | chr3  | 42751260/G//T       | nonsynonymous | 1 | 0 |
| KLHL6    | chr3  | 183273168/C//T      | nonsynonymous | 1 | 0 |
| EVC2     | chr4  | 5564548/G//T        | synonymous    | 1 | 0 |
| HTRA3    | chr4  | 8293200/C//T        | nonsynonymous | 1 | 0 |
| PLEKHG4B | chr5  | 161985/G//A         | nonsynonymous | 1 | 0 |
| CTNND2   | chr5  | 11159743/G//A       | nonsynonymous | 1 | 0 |
| MAP3K1   | chr5  | 56177572/T//G       | nonsynonymous | 1 | 0 |
| TMEM174  | chr5  | 72469396/C//T       | nonsynonymous | 1 | 0 |
| APC      | chr5  | 112175423/C//T      | nonsynonymous | 1 | 0 |
| FSTL4    | chr5  | 132534717/C//T      | synonymous    | 1 | 0 |
| PCDHGA4  | chr5  | 140735077/A//G      | nonsynonymous | 1 | 0 |
| TCOF1    | chr5  | 149776261/A//T      | nonsynonymous | 1 | 0 |
| VWC2     | chr7  | 49815448/C//T       | synonymous    | 1 | 0 |
| GTF2IRD1 | chr7  | 74005218/C//T       | synonymous    | 1 | 0 |
| RBM48    | chr7  | 92163855/G//A       | synonymous    | 1 | 0 |
| MUC17    | chr7  | 100682566/G//A      | nonsynonymous | 1 | 0 |
| ATP6V0A4 | chr7  | 138453545/G//A      | nonsynonymous | 1 | 0 |
| ZNF703   | chr8  | 37554809/C//T       | synonymous    | 1 | 0 |

|          |       |                |               |   |   |
|----------|-------|----------------|---------------|---|---|
| FAM110B  | chr8  | 59059391/C//T  | nonsynonymous | 1 | 0 |
|          | chr8  | 69552680/G//T  | synonymous    | 1 | 0 |
| PSKH2    | chr8  | 87060713/G//A  | nonsynonymous | 1 | 0 |
| TRPS1    | chr8  | 116599328/T//A | nonsynonymous | 1 | 0 |
| EIF3H    | chr8  | 117738365/G//T | nonsynonymous | 1 | 0 |
| COL22A1  | chr8  | 139601521/C//T | nonsynonymous | 1 | 0 |
| ALDH1B1  | chr9  | 38395949/G//A  | synonymous    | 1 | 0 |
| C9orf170 | chr9  | 89771571/C//T  | synonymous    | 1 | 0 |
| PTCHD3   | chr10 | 27692282/C//A  | nonsynonymous | 1 | 0 |
| CTNNA3   | chr10 | 69299304/G//A  | nonsynonymous | 1 | 0 |
| CNNM1    | chr10 | 101089521/G//A | nonsynonymous | 1 | 0 |
| PIK3C2A  | chr11 | 17143769/G//A  | nonsynonymous | 1 | 0 |
| OR9G1    | chr11 | 56468125/G//A  | nonsynonymous | 1 | 0 |
| CDC42BPG | chr11 | 64602556/T//C  | nonsynonymous | 1 | 0 |
| MAJIN    | chr11 | 64722229/C//T  | synonymous    | 1 | 0 |
| CADM1    | chr11 | 115099990/G//T | synonymous    | 1 | 0 |
| GUCY2C   | chr12 | 14834387/G//A  | synonymous    | 1 | 0 |
| GRIP1    | chr12 | 66839124/C//T  | nonsynonymous | 1 | 0 |
| CMKLR1   | chr12 | 108685994/C//T | nonsynonymous | 1 | 0 |
| HPD      | chr12 | 122294503/T//C | nonsynonymous | 1 | 0 |
| KTN1     | chr14 | 56083231/A//C  | synonymous    | 1 | 0 |
| DYNC1H1  | chr14 | 102504901/G//A | synonymous    | 1 | 0 |
| CEP170B  | chr14 | 105349814/C//T | synonymous    | 1 | 0 |
| CHRNA3   | chr15 | 78888945/C//G  | synonymous    | 1 | 0 |
| WDR90    | chr16 | 707778/G//A    | synonymous    | 1 | 0 |
| MYH11    | chr16 | 15854419/T//C  | nonsynonymous | 1 | 0 |
| GPRC5B   | chr16 | 19884093/C//T  | synonymous    | 1 | 0 |
| SPN      | chr16 | 29675259/C//T  | synonymous    | 1 | 0 |
| TOX3     | chr16 | 52473133/G//A  | synonymous    | 1 | 0 |
| ATP6V0A1 | chr17 | 40630581/G//A  | nonsynonymous | 1 | 0 |
| SUPT4H1  | chr17 | 56428769/A//C  | nonsynonymous | 1 | 0 |
| TBC1D16  | chr17 | 77914563/G//A  | synonymous    | 1 | 0 |
| CETN1    | chr18 | 580790/C//T    | nonsynonymous | 1 | 0 |
| MUC16    | chr19 | 8974072/C//T   | nonsynonymous | 1 | 0 |
| ZSWIM4   | chr19 | 13919899/C//T  | nonsynonymous | 1 | 0 |
| TSHZ3    | chr19 | 31769340/C//T  | synonymous    | 1 | 0 |
| NPHS1    | chr19 | 36339605/C//T  | synonymous    | 1 | 0 |
| RYR1     | chr19 | 38980792/G//A  | nonsynonymous | 1 | 0 |
| PIH1D1   | chr19 | 49952828/C//T  | nonsynonymous | 1 | 0 |
| RDH13    | chr19 | 55560098/G//A  | nonsynonymous | 1 | 0 |
| ZNF667   | chr19 | 56953456/T//C  | nonsynonymous | 1 | 0 |
| SNAP25   | chr20 | 10277627/G//T  | synonymous    | 1 | 0 |
| DZANK1   | chr20 | 18446028/A//C  | synonymous    | 1 | 0 |
| TNFRSF14 | chr1  | 2493255/G//A   | nonsynonymous | 0 | 1 |
| XIRP2    | chr2  | 168099530/G//A | nonsynonymous | 0 | 1 |
|          | chr2  | 223065773/C//T | synonymous    | 0 | 1 |
| ALDH1L1  | chr3  | 125850246/C//A | nonsynonymous | 0 | 1 |
| TFDP2    | chr3  | 141671423/C//A | nonsynonymous | 0 | 1 |
| ZFP57    | chr6  | 29644688/T//C  | synonymous    | 0 | 1 |
| RORA     | chr15 | 60803748/T//C  | nonsynonymous | 0 | 1 |
| TNS4     | chr17 | 38634836/G//A  | nonsynonymous | 0 | 1 |
| EPX      | chr17 | 56274319/G//A  | nonsynonymous | 0 | 1 |
| DOK6     | chr18 | 67508553/G//C  | nonsynonymous | 0 | 1 |
| PNMAL2   | chr19 | 46997605/C//T  | nonsynonymous | 0 | 1 |
| EHD2     | chr19 | 48239731/A//G  | nonsynonymous | 0 | 1 |
| FLG      | chr1  | 152277218/G//A | nonsynonymous | 0 | 1 |
| SLAMF6   | chr1  | 160456950/T//C | nonsynonymous | 0 | 1 |
| ANTXR1   | chr2  | 69409775/T//G  | nonsynonymous | 0 | 1 |
| RALB     | chr2  | 121050771/G//T | nonsynonymous | 0 | 1 |
| NEB      | chr2  | 152512986/G//T | synonymous    | 0 | 1 |
| FN1      | chr2  | 216286974/G//T | synonymous    | 0 | 1 |
| EIF4E2   | chr2  | 233431791/G//T | nonsynonymous | 0 | 1 |
| CPZ      | chr4  | 8621052/C//A   | nonsynonymous | 0 | 1 |
| DHX15    | chr4  | 24557884/G//T  | nonsynonymous | 0 | 1 |
| ADH1C    | chr4  | 100266117/C//A | nonsynonymous | 0 | 1 |
| FAT1     | chr4  | 187539681/C//G | nonsynonymous | 0 | 1 |
| GRIA1    | chr5  | 153078591/C//A | nonsynonymous | 0 | 1 |
| SLC17A1  | chr6  | 25811903/G//T  | synonymous    | 0 | 1 |
| AK9      | chr6  | 109954527/C//A | nonsynonymous | 0 | 1 |
| MAP7     | chr6  | 136732758/C//A | nonsynonymous | 0 | 1 |

|          |       |                |               |   |   |
|----------|-------|----------------|---------------|---|---|
| GRM8     | chr7  | 126173195/G//T | synonymous    | 0 | 1 |
| KMT2C    | chr7  | 151873360/C//A | nonsynonymous | 0 | 1 |
| PINX1    | chr8  | 10622973/C//A  | nonsynonymous | 0 | 1 |
| DLC1     | chr8  | 12943827/G//T  | nonsynonymous | 0 | 1 |
| CISD1    | chr10 | 60028986/C//A  | synonymous    | 0 | 1 |
| ACCSL    | chr11 | 44075057/G//T  | nonsynonymous | 0 | 1 |
| KBTBD7   | chr13 | 41767341/A//G  | synonymous    | 0 | 1 |
| MNAT1    | chr14 | 61346534/G//T  | nonsynonymous | 0 | 1 |
| CDH3     | chr16 | 68716280/A//T  | nonsynonymous | 0 | 1 |
| NGFR     | chr17 | 47587773/G//A  | nonsynonymous | 0 | 1 |
| SERINC3  | chr20 | 43142601/G//T  | synonymous    | 0 | 1 |
| EPHA2    | chr1  | 16461529/A//G  | nonsynonymous | 0 | 1 |
| CDC14A   | chr1  | 100963701/C//A | synonymous    | 0 | 1 |
| NOTCH2   | chr1  | 120469211/C//A | nonsynonymous | 0 | 1 |
| NUP210L  | chr1  | 154002435/C//A | nonsynonymous | 0 | 1 |
| CD1E     | chr1  | 158325818/C//T | nonsynonymous | 0 | 1 |
| ACTR1B   | chr2  | 98273309/C//T  | synonymous    | 0 | 1 |
| SCN3A    | chr2  | 166032822/C//A | nonsynonymous | 0 | 1 |
| XIRP2    | chr2  | 168107782/G//T | nonsynonymous | 0 | 1 |
| ANKAR    | chr2  | 190592631/C//A | nonsynonymous | 0 | 1 |
| ACTR8    | chr3  | 53907070/C//A  | nonsynonymous | 0 | 1 |
| MAATS1   | chr3  | 119459479/G//T | synonymous    | 0 | 1 |
| COL6A5   | chr3  | 130116479/G//T | synonymous    | 0 | 1 |
| EPHA5    | chr4  | 66467879/G//T  | synonymous    | 0 | 1 |
| TTC29    | chr4  | 147628224/T//C | synonymous    | 0 | 1 |
| KIAA0825 | chr5  | 93856361/T//A  | nonsynonymous | 0 | 1 |
| SH3TC2   | chr5  | 148384435/G//T | nonsynonymous | 0 | 1 |
| RBM22    | chr5  | 150072465/G//T | nonsynonymous | 0 | 1 |
| SKIV2L   | chr6  | 31935596/C//A  | synonymous    | 0 | 1 |
| RING1    | chr6  | 33179196/G//T  | synonymous    | 0 | 1 |
| STXBP5   | chr6  | 147680367/G//T | nonsynonymous | 0 | 1 |
| C8orf74  | chr8  | 10532308/G//T  | nonsynonymous | 0 | 1 |
| TRIM66   | chr11 | 8641076/G//T   | nonsynonymous | 0 | 1 |
| UBASH3B  | chr11 | 122669676/A//G | nonsynonymous | 0 | 1 |
| C3AR1    | chr12 | 8211721/G//C   | nonsynonymous | 0 | 1 |
| ABCC9    | chr12 | 22086768/C//A  | nonsynonymous | 0 | 1 |
| XPOT     | chr12 | 64819193/G//T  | nonsynonymous | 0 | 1 |
| AACS     | chr12 | 125561121/C//A | nonsynonymous | 0 | 1 |
| CLYBL    | chr13 | 100425254/C//A | nonsynonymous | 0 | 1 |
| GCNT3    | chr15 | 59911193/G//T  | nonsynonymous | 0 | 1 |
| NDE1     | chr16 | 15781280/C//A  | synonymous    | 0 | 1 |
| SULT1A1  | chr16 | 28619674/G//T  | nonsynonymous | 0 | 1 |
| ENO3     | chr17 | 4858823/G//T   | synonymous    | 0 | 1 |
| MRPS23   | chr17 | 55927420/C//T  | synonymous    | 0 | 1 |
| PPM1E    | chr17 | 56833475/C//A  | synonymous    | 0 | 1 |
| ALPK2    | chr18 | 56165323/C//G  | nonsynonymous | 0 | 1 |
| ZNF426   | chr19 | 9639029/C//A   | synonymous    | 0 | 1 |
| CACNA1A  | chr19 | 13373652/G//T  | synonymous    | 0 | 1 |
| ZNF99    | chr19 | 22940394/A//T  | nonsynonymous | 0 | 1 |
| EXOSC5   | chr19 | 41895700/G//A  | synonymous    | 0 | 1 |
| KLK7     | chr19 | 51487256/C//G  | synonymous    | 0 | 1 |
| TBC1D20  | chr20 | 422563/C//A    | synonymous    | 0 | 1 |
| ADNP     | chr20 | 49508115/G//T  | nonsynonymous | 0 | 1 |
| PPIL2    | chr22 | 22051288/C//A  | synonymous    | 0 | 1 |
| MIEF1    | chr22 | 39908251/C//T  | nonsynonymous | 0 | 1 |
| ACO2     | chr22 | 41916215/C//A  | nonsynonymous | 0 | 1 |
| HUWE1    | chrX  | 53561098/G//T  | nonsynonymous | 0 | 1 |
| HUWE1    | chrX  | 53595708/C//A  | synonymous    | 0 | 1 |
| MAGEE1   | chrX  | 75648911/A//G  | synonymous    | 0 | 1 |
| RAB3GAP1 | chr2  | 135920551/G//A | synonymous    | 0 | 1 |
| ASIC5    | chr4  | 156757953/C//T | nonsynonymous | 0 | 1 |
| OVCH2    | chr11 | 7726202/ACT//A | nonsynonymous | 0 | 1 |
| MMP19    | chr12 | 56236612/C//A  | nonsynonymous | 0 | 1 |
| CEACAM5  | chr19 | 42212588/A//G  | synonymous    | 0 | 1 |
| SPO11    | chr20 | 55910962/C//T  | nonsynonymous | 0 | 1 |
| DSCAM    | chr21 | 42080523/C//T  | nonsynonymous | 0 | 1 |
| PHKA2    | chrX  | 18926918/C//G  | nonsynonymous | 0 | 1 |
| KAZN     | chr1  | 15429883/A//G  | nonsynonymous | 0 | 1 |
| KLF17    | chr1  | 44595176/C//T  | nonsynonymous | 0 | 1 |
|          | chr1  | 154832233/C//T | synonymous    | 0 | 1 |

|          |       |                |               |   |   |
|----------|-------|----------------|---------------|---|---|
| CD5L     | chr1  | 157805922/C//G | nonsynonymous | 0 | 1 |
| SLAMF7   | chr1  | 160719819/C//T | synonymous    | 0 | 1 |
| CACNA1E  | chr1  | 181548207/G//A | nonsynonymous | 0 | 1 |
| TGFBRAP1 | chr2  | 105912951/G//A | synonymous    | 0 | 1 |
| LRP2     | chr2  | 170099968/C//T | synonymous    | 0 | 1 |
| HOXD11   | chr2  | 176973790/T//G | nonsynonymous | 0 | 1 |
| DAW1     | chr2  | 228786284/A//G | synonymous    | 0 | 1 |
| FAM208A  | chr3  | 56716768/G//A  | synonymous    | 0 | 1 |
| MAG11    | chr3  | 65425603/T//C  | synonymous    | 0 | 1 |
| ROBO2    | chr3  | 77526559/C//A  | synonymous    | 0 | 1 |
| CCDC80   | chr3  | 112358646/C//T | nonsynonymous | 0 | 1 |
| P3H2     | chr3  | 189706770/C//T | nonsynonymous | 0 | 1 |
| EDIL3    | chr5  | 83239326/T//C  | nonsynonymous | 0 | 1 |
| PRRC1    | chr5  | 126874762/C//T | nonsynonymous | 0 | 1 |
| FAT2     | chr5  | 150945441/C//T | nonsynonymous | 0 | 1 |
| MSX2     | chr5  | 174151854/G//A | synonymous    | 0 | 1 |
| LRFN2    | chr6  | 40400194/C//T  | nonsynonymous | 0 | 1 |
| ARMC2    | chr6  | 109282801/G//A | nonsynonymous | 0 | 1 |
| FAM20C   | chr7  | 193557/G//A    | nonsynonymous | 0 | 1 |
| ABCA13   | chr7  | 48413990/C//G  | nonsynonymous | 0 | 1 |
| BAIAP2L1 | chr7  | 97937061/G//A  | nonsynonymous | 0 | 1 |
| MUC17    | chr7  | 100676968/G//A | synonymous    | 0 | 1 |
| MUC17    | chr7  | 100676972/T//G | nonsynonymous | 0 | 1 |
| MUC17    | chr7  | 100676975/A//G | nonsynonymous | 0 | 1 |
| HILPDA   | chr7  | 128097383/G//A | nonsynonymous | 0 | 1 |
| TNKS     | chr8  | 9590821/A//G   | nonsynonymous | 0 | 1 |
| COL14A1  | chr8  | 121298173/T//A | synonymous    | 0 | 1 |
| C10orf10 | chr10 | 45473359/G//A  | synonymous    | 0 | 1 |
| SLF2     | chr10 | 102676985/A//G | synonymous    | 0 | 1 |
| CYP2E1   | chr10 | 135352289/C//T | nonsynonymous | 0 | 1 |
|          | chr11 | 74429886/C//T  | synonymous    | 0 | 1 |
| FAT3     | chr11 | 92088168/G//T  | nonsynonymous | 0 | 1 |
| CRYAB    | chr11 | 111779627/G//A | nonsynonymous | 0 | 1 |
| ATN1     | chr12 | 7045903/G//A   | synonymous    | 0 | 1 |
| CLEC12A  | chr12 | 10131668/G//T  | synonymous    | 0 | 1 |
| GUCY2C   | chr12 | 14769648/G//A  | synonymous    | 0 | 1 |
| CCDC175  | chr14 | 60018075/G//T  | nonsynonymous | 0 | 1 |
| PCNX4    | chr14 | 60592418/G//T  | synonymous    | 0 | 1 |
| OCA2     | chr15 | 28228486/C//T  | synonymous    | 0 | 1 |
| RASGRF1  | chr15 | 79341880/G//A  | synonymous    | 0 | 1 |
| PLIN1    | chr15 | 90213364/C//T  | nonsynonymous | 0 | 1 |
| HIRIP3   | chr16 | 30005902/A//G  | synonymous    | 0 | 1 |
| KAT8     | chr16 | 31131803/C//T  | nonsynonymous | 0 | 1 |
| P2RX1    | chr17 | 3801167/G//A   | nonsynonymous | 0 | 1 |
| MYH4     | chr17 | 10353795/G//A  | nonsynonymous | 0 | 1 |
| MPRIP    | chr17 | 17061749/G//A  | synonymous    | 0 | 1 |
| RAB11B   | chr19 | 8464941/G//A   | nonsynonymous | 0 | 1 |
| PDE4A    | chr19 | 10531603/G//A  | nonsynonymous | 0 | 1 |
| PSG6     | chr19 | 43411745/A//T  | nonsynonymous | 0 | 1 |
| PSG7     | chr19 | 43430635/G//A  | nonsynonymous | 0 | 1 |
| PNMAL2   | chr19 | 46998632/C//T  | nonsynonymous | 0 | 1 |
| NLRP2    | chr19 | 55494076/G//A  | nonsynonymous | 0 | 1 |
| ANKEF1   | chr20 | 10032366/C//T  | nonsynonymous | 0 | 1 |
| ADAMTS5  | chr21 | 28302341/C//T  | nonsynonymous | 0 | 1 |
| ITSN1    | chr21 | 35186250/G//A  | synonymous    | 0 | 1 |
| HIRA     | chr22 | 19373085/C//T  | nonsynonymous | 0 | 1 |
| PI4KA    | chr22 | 21174187/T//C  | synonymous    | 0 | 1 |
| ZNF280A  | chr22 | 22868586/G//A  | nonsynonymous | 0 | 1 |
| ADSL     | chr22 | 40742532/C//T  | synonymous    | 0 | 1 |
| PDHA1    | chrX  | 19375842/G//A  | synonymous    | 0 | 1 |
| MAGEB6   | chrX  | 26212489/G//T  | nonsynonymous | 0 | 1 |
| MED14    | chrX  | 40522239/C//G  | nonsynonymous | 0 | 1 |
| MAGIX    | chrX  | 49020184/G//A  | nonsynonymous | 0 | 1 |
| PRICKLE3 | chrX  | 49035641/G//A  | nonsynonymous | 0 | 1 |
| TBC1D8B  | chrX  | 106065296/T//A | nonsynonymous | 0 | 1 |
| CT47B1   | chrX  | 120009199/G//A | nonsynonymous | 0 | 1 |
| GPC3     | chrX  | 133119415/G//A | nonsynonymous | 0 | 1 |
| MAP7D3   | chrX  | 135313889/G//A | synonymous    | 0 | 1 |
| GPR50    | chrX  | 150348322/G//A | nonsynonymous | 0 | 1 |
| COL16A1  | chr1  | 32134409/C//T  | synonymous    | 0 | 1 |

|          |       |                 |               |   |   |
|----------|-------|-----------------|---------------|---|---|
| SLC5A9   | chr1  | 48713124/T//C   | nonsynonymous | 0 | 1 |
| AMIGO1   | chr1  | 110051285/G//A  | nonsynonymous | 0 | 1 |
| CACNA1E  | chr1  | 181768048/C//T  | synonymous    | 0 | 1 |
| LRP2     | chr2  | 170135978/C//T  | nonsynonymous | 0 | 1 |
| TTN      | chr2  | 179427828/G//A  | synonymous    | 0 | 1 |
| TTN      | chr2  | 179458769/G//A  | nonsynonymous | 0 | 1 |
| PRSS56   | chr2  | 233386821/G//A  | nonsynonymous | 0 | 1 |
| ESPNL    | chr2  | 239040113/G//A  | nonsynonymous | 0 | 1 |
| CFAP100  | chr3  | 126135307/G//A  | nonsynonymous | 0 | 1 |
| PARL     | chr3  | 183547352/G//A  | synonymous    | 0 | 1 |
| FBXL7    | chr5  | 15936822/C//T   | nonsynonymous | 0 | 1 |
| CAMK4    | chr5  | 110818625/G//A  | nonsynonymous | 0 | 1 |
| TRIM41   | chr5  | 180661938/A//G  | synonymous    | 0 | 1 |
| FOXC1    | chr6  | 1612242/C//T    | nonsynonymous | 0 | 1 |
| TULP1    | chr6  | 35480432/G//A   | nonsynonymous | 0 | 1 |
| DPYSL4   | chr10 | 134006288/G//A  | synonymous    | 0 | 1 |
| VWCE     | chr11 | 61026449/T//C   | nonsynonymous | 0 | 1 |
| ACSS3    | chr12 | 81471893/G//A   | synonymous    | 0 | 1 |
| CCDC60   | chr12 | 119926627/C//A  | nonsynonymous | 0 | 1 |
| TMEM132C | chr12 | 128900065/G//A  | nonsynonymous | 0 | 1 |
| DDX51    | chr12 | 132624721/G//A  | nonsynonymous | 0 | 1 |
| METTL21C | chr13 | 103346751/G//A  | nonsynonymous | 0 | 1 |
| CCDC168  | chr13 | 103400485/A//G  | synonymous    | 0 | 1 |
| ANKRD30B | chr18 | 14791416/T//C   | nonsynonymous | 0 | 1 |
| ZNF521   | chr18 | 22806591/C//A   | nonsynonymous | 0 | 1 |
| CDH19    | chr18 | 64211317/G//C   | nonsynonymous | 0 | 1 |
| DOCK6    | chr19 | 11313372/G//A   | nonsynonymous | 0 | 1 |
| SLC8A2   | chr19 | 47969386/C//T   | nonsynonymous | 0 | 1 |
| ZNF587B  | chr19 | 58355773/G//A   | synonymous    | 0 | 1 |
| WAS      | chrX  | 48544528/G//A   | synonymous    | 0 | 1 |
| RGAG4    | chrX  | 71350506/G//A   | synonymous    | 0 | 1 |
| LAGE3    | chrX  | 153707216/G//A  | synonymous    | 0 | 1 |
| CELSR2   | chr1  | 109812752/C//T  | synonymous    | 1 | 0 |
| SWT1     | chr1  | 185159711/GA//G | nonsynonymous | 1 | 0 |
| IFT172   | chr2  | 27707969/C//G   | nonsynonymous | 1 | 0 |
| PUS10    | chr2  | 61239025/T//C   | nonsynonymous | 1 | 0 |
| SCN9A    | chr2  | 167055257/T//A  | synonymous    | 1 | 0 |
| KALRN    | chr3  | 123983517/A//C  | nonsynonymous | 1 | 0 |
| SLC22A23 | chr6  | 3273153/G//A    | synonymous    | 1 | 0 |
| OPRK1    | chr8  | 54141897/G//T   | nonsynonymous | 1 | 0 |
| CHD7     | chr8  | 61768708/C//T   | nonsynonymous | 1 | 0 |
| KIAA1217 | chr10 | 24762383/G//A   | nonsynonymous | 1 | 0 |
| LUZP2    | chr11 | 25004714/T//G   | nonsynonymous | 1 | 0 |
| RARRES3  | chr11 | 63312108/C//A   | nonsynonymous | 1 | 0 |
| ARHGAP32 | chr11 | 128843082/G//C  | nonsynonymous | 1 | 0 |
| ADAMTS20 | chr12 | 43826131/A//C   | nonsynonymous | 1 | 0 |
| SFSWAP   | chr12 | 132195931/G//A  | nonsynonymous | 1 | 0 |
| TUBA3C   | chr13 | 19748256/T//C   | nonsynonymous | 1 | 0 |
| EDNRB    | chr13 | 78492569/G//A   | nonsynonymous | 1 | 0 |
| FES      | chr15 | 91436548/C//T   | nonsynonymous | 1 | 0 |
| SBNO2    | chr19 | 1122282/C//T    | nonsynonymous | 1 | 0 |
| FPR2     | chr19 | 52272632/C//T   | nonsynonymous | 1 | 0 |
| NEFH     | chr22 | 29876449/T//C   | synonymous    | 1 | 0 |
| USP11    | chrX  | 47103002/G//A   | nonsynonymous | 1 | 0 |
| TFE3     | chrX  | 48895939/C//T   | nonsynonymous | 1 | 0 |
| RPS6KA6  | chrX  | 83374897/A//C   | nonsynonymous | 1 | 0 |
| SAGE1    | chrX  | 134994053/A//G  | nonsynonymous | 1 | 0 |
| CCDC24   | chr1  | 44461299/G//A   | synonymous    | 1 | 0 |
| TNR      | chr1  | 175335178/C//T  | nonsynonymous | 1 | 0 |
| ASTN1    | chr1  | 176903419/G//A  | nonsynonymous | 1 | 0 |
| TGFB2    | chr1  | 218519986/G//GT | synonymous    | 1 | 0 |
| TTN      | chr2  | 179574482/G//C  | nonsynonymous | 1 | 0 |
|          | chr2  | 179611568/C//G  | synonymous    | 1 | 0 |
| FSIP2    | chr2  | 186657726/C//G  | nonsynonymous | 1 | 0 |
| ARHGEF3  | chr3  | 56763545/C//T   | nonsynonymous | 1 | 0 |
| LRIG1    | chr3  | 66501994/G//A   | synonymous    | 1 | 0 |
| TNIP2    | chr4  | 2749631/CCT//C  | nonsynonymous | 1 | 0 |
| GRXCR1   | chr4  | 42895362/C//T   | nonsynonymous | 1 | 0 |
| PCDH10   | chr4  | 134073249/C//T  | nonsynonymous | 1 | 0 |
| FREM3    | chr4  | 144617149/C//G  | nonsynonymous | 1 | 0 |

|            |       |                         |               |   |   |
|------------|-------|-------------------------|---------------|---|---|
| IRX4       | chr5  | 1878714/G//A            | nonsynonymous | 1 | 0 |
| FAM172A    | chr5  | 92956636/T//C           | synonymous    | 1 | 0 |
| PCDHGB2    | chr5  | 140741673/G//C          | synonymous    | 1 | 0 |
| KIAA0141   | chr5  | 141309253/C//T          | synonymous    | 1 | 0 |
| BCKDHB     | chr6  | 80910723/T//G           | nonsynonymous | 1 | 0 |
| BACH2      | chr6  | 90642386/G//A           | nonsynonymous | 1 | 0 |
| FIG4       | chr6  | 110064889/G//A          | nonsynonymous | 1 | 0 |
| ANLN       | chr7  | 36456702/C//T           | synonymous    | 1 | 0 |
| GLI3       | chr7  | 42187878/C//T           | nonsynonymous | 1 | 0 |
| HECW1      | chr7  | 43484524/G//A           | nonsynonymous | 1 | 0 |
| PTPRZ1     | chr7  | 121652025/G//A          | synonymous    | 1 | 0 |
| PNMA2      | chr8  | 26365313/G//A           | nonsynonymous | 1 | 0 |
| ANK1       | chr8  | 41575639/G//A           | synonymous    | 1 | 0 |
| TLN1       | chr9  | 35711339/G//A           | nonsynonymous | 1 | 0 |
| RECK       | chr9  | 36063805/G//A           | synonymous    | 1 | 0 |
| PTGES      | chr9  | 132502055/G//A          | synonymous    | 1 | 0 |
| GRID1      | chr10 | 87966159/C//T           | nonsynonymous | 1 | 0 |
| TEX36      | chr10 | 127350448/C//T          | synonymous    | 1 | 0 |
|            | chr11 | 10482912/A//C           | synonymous    | 1 | 0 |
| AHNAK      | chr11 | 62294220/C//T           | nonsynonymous | 1 | 0 |
| RPS6KA4    | chr11 | 64128707/G//A           | synonymous    | 1 | 0 |
| PPM1H      | chr12 | 63195861/C//T           | nonsynonymous | 1 | 0 |
| PPM1H      | chr12 | 63195862/GTACGCCACCA//G | nonsynonymous | 1 | 0 |
| TRPC4      | chr13 | 38211357/G//A           | nonsynonymous | 1 | 0 |
| SLITRK5    | chr13 | 88328216/T//A           | nonsynonymous | 1 | 0 |
| F7         | chr13 | 113772980/G//A          | synonymous    | 1 | 0 |
| RASGRF1    | chr15 | 79296172/G//A           | synonymous    | 1 | 0 |
| PEX11A     | chr15 | 90233895/G//A           | synonymous    | 1 | 0 |
| ZNF668     | chr16 | 31073213/C//T           | nonsynonymous | 1 | 0 |
| TP53       | chr17 | 7579377/G//A            | nonsynonymous | 1 | 0 |
| TMC6       | chr17 | 76113915/G//A           | synonymous    | 1 | 0 |
| L3MBTL4    | chr18 | 6263972/C//T            | nonsynonymous | 1 | 0 |
| DPP9-AS1   | chr19 | 4684914/G//A            | synonymous    | 1 | 0 |
| FBN3       | chr19 | 8174242/G//A            | nonsynonymous | 1 | 0 |
| CHST8      | chr19 | 34263492/G//A           | nonsynonymous | 1 | 0 |
| SYCN       | chr19 | 39694822/C//T           | nonsynonymous | 1 | 0 |
| ARHGEF1    | chr19 | 42406450/C//T           | nonsynonymous | 1 | 0 |
| PPFIA3     | chr19 | 49637110/G//C           | nonsynonymous | 1 | 0 |
| GPR32      | chr19 | 51274358/C//T           | synonymous    | 1 | 0 |
| GP6        | chr19 | 55543882/G//A           | nonsynonymous | 1 | 0 |
| SHISA7     | chr19 | 55952038/C//T           | nonsynonymous | 1 | 0 |
| HAO1       | chr20 | 7894946/C//T            | nonsynonymous | 1 | 0 |
| ZHX3       | chr20 | 39813844/G//A           | synonymous    | 1 | 0 |
| WISP2      | chr20 | 43348691/G//A           | nonsynonymous | 1 | 0 |
| GGA1       | chr22 | 38004855/G//A           | synonymous    | 1 | 0 |
| CPXCR1     | chrX  | 88009231/T//C           | synonymous    | 1 | 0 |
| PDZD4      | chrX  | 153069584/C//T          | nonsynonymous | 1 | 0 |
| RNF223     | chr1  | 1007863/G//C            | synonymous    | 0 | 1 |
| CEP104     | chr1  | 3731955/C//T            | synonymous    | 0 | 1 |
| USH2A      | chr1  | 215990450/G//A          | synonymous    | 0 | 1 |
| NMI        | chr2  | 152138493/G//A          | nonsynonymous | 0 | 1 |
| LY75-CD302 | chr2  | 160738683/G//A          | nonsynonymous | 0 | 1 |
| SLC41A3    | chr3  | 125786813/C//T          | nonsynonymous | 0 | 1 |
| IGSF10     | chr3  | 151161457/C//T          | nonsynonymous | 0 | 1 |
| BCHE       | chr3  | 165548795/G//A          | synonymous    | 0 | 1 |
| FYTTD1     | chr3  | 197476796/C//A          | synonymous    | 0 | 1 |
| SEMA6A     | chr5  | 115803401/G//A          | nonsynonymous | 0 | 1 |
| DGKB       | chr7  | 14653001/A//G           | nonsynonymous | 0 | 1 |
| C8orf34    | chr8  | 69243520/G//A           | synonymous    | 0 | 1 |
| RAD54B     | chr8  | 95404120/T//G           | nonsynonymous | 0 | 1 |
| TMEM262    | chr11 | 64856464/T//G           | nonsynonymous | 0 | 1 |
| CEP290     | chr12 | 88483023/C//T           | nonsynonymous | 0 | 1 |
| DRAM1      | chr12 | 102313933/C//T          | nonsynonymous | 0 | 1 |
| SHF        | chr15 | 45467553/C//A           | nonsynonymous | 0 | 1 |
| RABEP1     | chr17 | 5241350/A//G            | nonsynonymous | 0 | 1 |
| KRTAP4-7   | chr17 | 39240819/C//G           | nonsynonymous | 0 | 1 |
| DEFB127    | chr20 | 139618/G//T             | nonsynonymous | 0 | 1 |
| KRTAP10-6  | chr21 | 46012345/G//A           | synonymous    | 0 | 1 |
| EFHC2      | chrX  | 44037749/G//T           | nonsynonymous | 0 | 1 |
| MTMR8      | chrX  | 63488686/C//A           | nonsynonymous | 0 | 1 |

|           |       |                   |               |   |   |
|-----------|-------|-------------------|---------------|---|---|
| SAMD11    | chr1  | 878174/A/C        | nonsynonymous | 0 | 1 |
| ADAMTSL4  | chr1  | 150525993/C/T     | nonsynonymous | 0 | 1 |
| CACNA1S   | chr1  | 201021722/AGTT//A | nonsynonymous | 0 | 1 |
| OR2T1     | chr1  | 248569793/C//A    | synonymous    | 0 | 1 |
| PGBD2     | chr1  | 249211252/A//G    | nonsynonymous | 0 | 1 |
| MYT1L     | chr2  | 1927015/G//A      | nonsynonymous | 0 | 1 |
| DCTN1     | chr2  | 74592702/C//A     | nonsynonymous | 0 | 1 |
| REG3G     | chr2  | 79254176/G//C     | nonsynonymous | 0 | 1 |
| TMEM87B   | chr2  | 112813198/G//C    | synonymous    | 0 | 1 |
| NEB       | chr2  | 152521103/C//A    | nonsynonymous | 0 | 1 |
| ALPI      | chr2  | 233322567/C//T    | synonymous    | 0 | 1 |
| KCNJ13    | chr2  | 233641209/A//G    | synonymous    | 0 | 1 |
| SLC6A11   | chr3  | 10885979/C//T     | nonsynonymous | 0 | 1 |
| LRTM1     | chr3  | 54952775/G//T     | nonsynonymous | 0 | 1 |
| CADM2     | chr3  | 85961601/G//A     | nonsynonymous | 0 | 1 |
| KALRN     | chr3  | 124385304/G//A    | synonymous    | 0 | 1 |
| PIK3CA    | chr3  | 178952085/A//G    | nonsynonymous | 0 | 1 |
| ZAR1      | chr4  | 48493209/G//T     | nonsynonymous | 0 | 1 |
| NPFFR2    | chr4  | 73013024/A//T     | nonsynonymous | 0 | 1 |
| TTC29     | chr4  | 147724712/C//A    | nonsynonymous | 0 | 1 |
| SLC9A3    | chr5  | 482797/C//T       | nonsynonymous | 0 | 1 |
| UTP15     | chr5  | 72875849/G//A     | nonsynonymous | 0 | 1 |
| HIST1H2AC | chr6  | 26124432/C//T     | synonymous    | 0 | 1 |
| GLP1R     | chr6  | 39046774/T//G     | nonsynonymous | 0 | 1 |
| GRM1      | chr6  | 146755118/G//T    | nonsynonymous | 0 | 1 |
| TMEM184A  | chr7  | 1588272/G//C      | nonsynonymous | 0 | 1 |
| AP5Z1     | chr7  | 4830418/C//T      | nonsynonymous | 0 | 1 |
| HOXA3     | chr7  | 27147987/C//T     | synonymous    | 0 | 1 |
| PRKAG2    | chr7  | 151478366/G//T    | nonsynonymous | 0 | 1 |
| ZFH4      | chr8  | 77765934/C//A     | synonymous    | 0 | 1 |
| LRRC14    | chr8  | 145745317/C//G    | nonsynonymous | 0 | 1 |
| TTC39B    | chr9  | 15189759/C//T     | synonymous    | 0 | 1 |
| C9orf43   | chr9  | 116183406/G//A    | synonymous    | 0 | 1 |
|           | chr10 | 55566684/A//G     | synonymous    | 0 | 1 |
| TRPM5     | chr11 | 2443546/T//G      | synonymous    | 0 | 1 |
| LRRC4C    | chr11 | 40136068/T//A     | nonsynonymous | 0 | 1 |
| OR5AS1    | chr11 | 55797932/T//C     | nonsynonymous | 0 | 1 |
| SLCO1B3   | chr12 | 21033799/G//T     | nonsynonymous | 0 | 1 |
| KRT78     | chr12 | 53233099/G//T     | nonsynonymous | 0 | 1 |
| ATP5B     | chr12 | 57033869/G//C     | nonsynonymous | 0 | 1 |
| KSR2      | chr12 | 117923406/A//T    | synonymous    | 0 | 1 |
| KATNAL1   | chr13 | 30784483/T//C     | nonsynonymous | 0 | 1 |
| PSME2     | chr14 | 24614682/G//A     | synonymous    | 0 | 1 |
| NAA30     | chr14 | 57857785/G//A     | nonsynonymous | 0 | 1 |
| TRPM7     | chr15 | 50853865/A//T     | synonymous    | 0 | 1 |
| CFAP52    | chr17 | 9511466/G//A      | nonsynonymous | 0 | 1 |
| ANKRD30B  | chr18 | 14848935/C//T     | synonymous    | 0 | 1 |
| ATP13A1   | chr19 | 19762609/T//C     | synonymous    | 0 | 1 |
| ZNF90     | chr19 | 20229661/T//C     | nonsynonymous | 0 | 1 |
| ZNF460    | chr19 | 57802631/G//A     | nonsynonymous | 0 | 1 |
| ZNF134    | chr19 | 58131535/G//A     | nonsynonymous | 0 | 1 |
| RTFDC1    | chr20 | 55088407/C//G     | nonsynonymous | 0 | 1 |
|           | chr20 | 57415215/C//T     | synonymous    | 0 | 1 |
| TIAM1     | chr21 | 32493018/G//A     | nonsynonymous | 0 | 1 |
| CCT8L2    | chr22 | 17073058/G//T     | nonsynonymous | 0 | 1 |
| MRPL20    | chr1  | 1342552/C//G      | nonsynonymous | 1 | 0 |
| NPHP4     | chr1  | 5987724/G//A      | nonsynonymous | 1 | 0 |
| SPEN      | chr1  | 16256039/C//T     | nonsynonymous | 1 | 0 |
| SPEN      | chr1  | 16261225/C//T     | synonymous    | 1 | 0 |
| CROCC     | chr1  | 17297983/G//C     | nonsynonymous | 1 | 0 |
| PADI1     | chr1  | 17552618/C//G     | nonsynonymous | 1 | 0 |
| HSPG2     | chr1  | 22222460/C//G     | nonsynonymous | 1 | 0 |
| RCAN3     | chr1  | 24861734/G//A     | synonymous    | 1 | 0 |
| RPS6KA1   | chr1  | 26878163/C//T     | synonymous    | 1 | 0 |
| SPOCD1    | chr1  | 32265436/G//C     | nonsynonymous | 1 | 0 |
| EPHA10    | chr1  | 38192766/C//A     | synonymous    | 1 | 0 |
| SZT2      | chr1  | 43896169/G//A     | nonsynonymous | 1 | 0 |
| DPH2      | chr1  | 44437938/C//G     | nonsynonymous | 1 | 0 |
| TESK2     | chr1  | 45810473/G//T     | synonymous    | 1 | 0 |
| GPBP1L1   | chr1  | 46120949/T//C     | nonsynonymous | 1 | 0 |

|          |      |                         |               |   |   |
|----------|------|-------------------------|---------------|---|---|
| DMRTA2   | chr1 | 50887206/C//T           | nonsynonymous | 1 | 0 |
| USP24    | chr1 | 55573005/C//G           | nonsynonymous | 1 | 0 |
| KANK4    | chr1 | 62740567/G//C           | nonsynonymous | 1 | 0 |
| GBP5     | chr1 | 89732235/C//T           | nonsynonymous | 1 | 0 |
| C1orf146 | chr1 | 92709821/G//A           | nonsynonymous | 1 | 0 |
| PTBP2    | chr1 | 97250744/G//T           | nonsynonymous | 1 | 0 |
| COL11A1  | chr1 | 103488391/A//T          | nonsynonymous | 1 | 0 |
| DCLRE1B  | chr1 | 114454079/C//T          | synonymous    | 1 | 0 |
| C1orf68  | chr1 | 152692587/C//A          | nonsynonymous | 1 | 0 |
| S100A7L2 | chr1 | 153410694/C//A          | nonsynonymous | 1 | 0 |
| DENND4B  | chr1 | 153913442/T//G          | nonsynonymous | 1 | 0 |
| DCST1    | chr1 | 155014067/G//A          | synonymous    | 1 | 0 |
| GON4L    | chr1 | 155790453/G//A          | synonymous    | 1 | 0 |
| GON4L    | chr1 | 155796689/G//T          | synonymous    | 1 | 0 |
| ETV3     | chr1 | 157094855/G//A          | synonymous    | 1 | 0 |
| CD1D     | chr1 | 158152889/C//A          | nonsynonymous | 1 | 0 |
| PIGM     | chr1 | 160000555/C//T          | synonymous    | 1 | 0 |
| NECTIN4  | chr1 | 161047318/G//A          | nonsynonymous | 1 | 0 |
| KIFAP3   | chr1 | 169947249/C//T          | nonsynonymous | 1 | 0 |
| SLC9C2   | chr1 | 173502751/G//A          | synonymous    | 1 | 0 |
| AXDND1   | chr1 | 179497499/G//C          | nonsynonymous | 1 | 0 |
| HMCN1    | chr1 | 185946970/C//T          | nonsynonymous | 1 | 0 |
| ZBTB41   | chr1 | 197168703/C//A          | nonsynonymous | 1 | 0 |
| TMEM183A | chr1 | 202985249/G//A          | nonsynonymous | 1 | 0 |
| LRRN2    | chr1 | 204587181/G//A          | nonsynonymous | 1 | 0 |
| PTPN14   | chr1 | 214558098/T//C          | nonsynonymous | 1 | 0 |
| USH2A    | chr1 | 216497566/C//T          | nonsynonymous | 1 | 0 |
| HHIPL2   | chr1 | 222717268/G//A          | synonymous    | 1 | 0 |
| OBSCN    | chr1 | 228523518/G//T          | nonsynonymous | 1 | 0 |
| OBSCN    | chr1 | 228528507/AGC//A        | nonsynonymous | 1 | 0 |
| TARBP1   | chr1 | 234565430/T//G          | synonymous    | 1 | 0 |
| KMO      | chr1 | 241729895/C//T          | synonymous    | 1 | 0 |
| OR2W3    | chr1 | 248059652/T//C          | nonsynonymous | 1 | 0 |
| ID2      | chr2 | 8822196/G//A            | synonymous    | 1 | 0 |
| NCOA1    | chr2 | 24930098/G//C           | nonsynonymous | 1 | 0 |
| TCF23    | chr2 | 27372140/G//A           | nonsynonymous | 1 | 0 |
| ZNF512   | chr2 | 27823590/G//A           | nonsynonymous | 1 | 0 |
| BIRC6    | chr2 | 32774440/C//G           | nonsynonymous | 1 | 0 |
| RASGRP3  | chr2 | 33783357/G//C           | nonsynonymous | 1 | 0 |
| FAM98A   | chr2 | 33811695/C//A           | synonymous    | 1 | 0 |
| STRN     | chr2 | 37105099/C//T           | nonsynonymous | 1 | 0 |
| MSH2     | chr2 | 47637271/C//G           | synonymous    | 1 | 0 |
| VPS54    | chr2 | 64139739/G//A           | nonsynonymous | 1 | 0 |
| MXD1     | chr2 | 70162564/G//C           | nonsynonymous | 1 | 0 |
| LRRTM1   | chr2 | 80530279/G//T           | synonymous    | 1 | 0 |
| TRABD2A  | chr2 | 85097470/C//A           | nonsynonymous | 1 | 0 |
| LONRF2   | chr2 | 100900817/G//A          | synonymous    | 1 | 0 |
| PTPN4    | chr2 | 120684184/G//A          | nonsynonymous | 1 | 0 |
| TFCP2L1  | chr2 | 121989404/C//T          | nonsynonymous | 1 | 0 |
| SMPD4    | chr2 | 130930912/C//T          | synonymous    | 1 | 0 |
| NCKAP5   | chr2 | 133541623/C//T          | nonsynonymous | 1 | 0 |
| TMEM163  | chr2 | 135308176/G//T          | nonsynonymous | 1 | 0 |
| GPD2     | chr2 | 157352623/G//A          | nonsynonymous | 1 | 0 |
| SCN1A    | chr2 | 166897755/T//C          | nonsynonymous | 1 | 0 |
| TTN      | chr2 | 179472948/C//A          | nonsynonymous | 1 | 0 |
| MAP2     | chr2 | 210560981/G//A          | nonsynonymous | 1 | 0 |
| TRPM8    | chr2 | 234869685/G//A          | nonsynonymous | 1 | 0 |
| SRGAP3   | chr3 | 9166502/T//C            | nonsynonymous | 1 | 0 |
| CMTM6    | chr3 | 32533348/C//T           | nonsynonymous | 1 | 0 |
| CCDC13   | chr3 | 42787432/G//A           | nonsynonymous | 1 | 0 |
| ALS2CL   | chr3 | 46724796/C//T           | synonymous    | 1 | 0 |
| SEMA3B   | chr3 | 50311211/C//T           | nonsynonymous | 1 | 0 |
| BAP1     | chr3 | 52436285/G//C           | synonymous    | 1 | 0 |
| BAP1     | chr3 | 52436330/G//A           | nonsynonymous | 1 | 0 |
| DNAH12   | chr3 | 57475322/C//G           | nonsynonymous | 1 | 0 |
| CD96     | chr3 | 111368541/C//A          | synonymous    | 1 | 0 |
| KALRN    | chr3 | 124157739/G//T          | nonsynonymous | 1 | 0 |
| TRIM42   | chr3 | 140401444/G//A          | nonsynonymous | 1 | 0 |
| SPSB4    | chr3 | 140785227/C//T          | nonsynonymous | 1 | 0 |
| MECOM    | chr3 | 168845832/GCGATTATTC//G | nonsynonymous | 1 | 0 |



|           |      |                |               |   |   |
|-----------|------|----------------|---------------|---|---|
| TNIK      | chr3 | 170856176/G//C | synonymous    | 1 | 0 |
| FNDC3B    | chr3 | 172060887/A//G | synonymous    | 1 | 0 |
| PEX5L     | chr3 | 179597763/C//G | nonsynonymous | 1 | 0 |
| CLDN16    | chr3 | 190106082/C//T | synonymous    | 1 | 0 |
| UTS2B     | chr3 | 190995875/C//G | nonsynonymous | 1 | 0 |
| PAK2      | chr3 | 196534776/G//A | nonsynonymous | 1 | 0 |
| LIMCH1    | chr4 | 41652586/C//T  | synonymous    | 1 | 0 |
| SGCB      | chr4 | 52894910/C//A  | nonsynonymous | 1 | 0 |
| CENPC     | chr4 | 68385122/G//C  | nonsynonymous | 1 | 0 |
| SLC4A4    | chr4 | 72399967/G//A  | nonsynonymous | 1 | 0 |
| TKTL2     | chr4 | 164393443/C//A | nonsynonymous | 1 | 0 |
| SPOCK3    | chr4 | 167921542/G//C | nonsynonymous | 1 | 0 |
| TENM3     | chr4 | 183717888/C//G | nonsynonymous | 1 | 0 |
| IRF2      | chr4 | 185340693/C//T | nonsynonymous | 1 | 0 |
| SLC9A3    | chr5 | 482785/C//T    | nonsynonymous | 1 | 0 |
| SLC6A18   | chr5 | 1240703/G//C   | synonymous    | 1 | 0 |
| SLC6A18   | chr5 | 1244753/G//T   | synonymous    | 1 | 0 |
| ICE1      | chr5 | 5462631/G//A   | nonsynonymous | 1 | 0 |
| DNAH5     | chr5 | 13721120/T//C  | nonsynonymous | 1 | 0 |
| MTMR12    | chr5 | 32263251/C//T  | synonymous    | 1 | 0 |
| RAI14     | chr5 | 34811141/G//T  | nonsynonymous | 1 | 0 |
| SLC1A3    | chr5 | 36608615/G//C  | nonsynonymous | 1 | 0 |
| WDR70     | chr5 | 37479947/A//G  | nonsynonymous | 1 | 0 |
| TRIM23    | chr5 | 64907537/G//A  | nonsynonymous | 1 | 0 |
| HEXB      | chr5 | 73992547/C//G  | nonsynonymous | 1 | 0 |
| RFESD     | chr5 | 94991989/C//G  | nonsynonymous | 1 | 0 |
| SLCO4C1   | chr5 | 101597682/G//C | nonsynonymous | 1 | 0 |
| SLCO6A1   | chr5 | 101726715/C//A | nonsynonymous | 1 | 0 |
| WDR36     | chr5 | 110428030/G//T | nonsynonymous | 1 | 0 |
| TGFB1     | chr5 | 135391485/G//T | synonymous    | 1 | 0 |
| NDUFA2    | chr5 | 140027146/C//A | nonsynonymous | 1 | 0 |
| PCDHA6    | chr5 | 140207821/G//A | nonsynonymous | 1 | 0 |
| PCDHAC1   | chr5 | 140307589/C//G | nonsynonymous | 1 | 0 |
| ARAP3     | chr5 | 141033958/C//A | synonymous    | 1 | 0 |
| SH3RF2    | chr5 | 145393384/G//C | synonymous    | 1 | 0 |
| PDE6A     | chr5 | 149278933/C//T | synonymous    | 1 | 0 |
| FAM71B    | chr5 | 156592810/G//A | nonsynonymous | 1 | 0 |
| STK10     | chr5 | 171554431/G//C | synonymous    | 1 | 0 |
| PHYKPL    | chr5 | 177651723/G//A | nonsynonymous | 1 | 0 |
| BTNL8     | chr5 | 180338553/A//G | nonsynonymous | 1 | 0 |
| F13A1     | chr6 | 6305588/G//A   | synonymous    | 1 | 0 |
| CAP2      | chr6 | 17463309/G//C  | synonymous    | 1 | 0 |
| HIST1H2BN | chr6 | 27806547/G//A  | synonymous    | 1 | 0 |
| VARS2     | chr6 | 30893361/C//T  | synonymous    | 1 | 0 |
| TBC1D22B  | chr6 | 37259034/C//G  | nonsynonymous | 1 | 0 |
| CMTR1     | chr6 | 37442319/G//A  | nonsynonymous | 1 | 0 |
| FOXP4     | chr6 | 41558001/C//G  | synonymous    | 1 | 0 |
| CUL9      | chr6 | 43154098/G//A  | nonsynonymous | 1 | 0 |
| TTBK1     | chr6 | 43214412/C//T  | nonsynonymous | 1 | 0 |
| DST       | chr6 | 56366327/G//C  | nonsynonymous | 1 | 0 |
| PTP4A1    | chr6 | 64286822/A//G  | nonsynonymous | 1 | 0 |
| ADGRB3    | chr6 | 70049379/T//A  | nonsynonymous | 1 | 0 |
| OSTM1     | chr6 | 108395659/C//G | nonsynonymous | 1 | 0 |
| CLVS2     | chr6 | 123377142/G//A | synonymous    | 1 | 0 |
| AKAP12    | chr6 | 151627011/G//C | nonsynonymous | 1 | 0 |
| ARID1B    | chr6 | 157517446/G//A | nonsynonymous | 1 | 0 |
| DAGLB     | chr7 | 6472552/G//A   | synonymous    | 1 | 0 |
| AHR       | chr7 | 17379014/C//G  | nonsynonymous | 1 | 0 |
| ABCB5     | chr7 | 20767983/C//T  | synonymous    | 1 | 0 |
| FAM188B   | chr7 | 30890096/G//A  | nonsynonymous | 1 | 0 |
| NME8      | chr7 | 37916441/G//C  | nonsynonymous | 1 | 0 |
| AMPH      | chr7 | 38431513/C//T  | nonsynonymous | 1 | 0 |
| POLM      | chr7 | 44113777/G//A  | nonsynonymous | 1 | 0 |
| YKT6      | chr7 | 44240771/G//C  | nonsynonymous | 1 | 0 |
| DDC       | chr7 | 50531103/A//C  | synonymous    | 1 | 0 |
| EIF4H     | chr7 | 73604602/A//C  | nonsynonymous | 1 | 0 |
| FGL2      | chr7 | 76828832/C//T  | synonymous    | 1 | 0 |
| PPP1R9A   | chr7 | 94897931/C//T  | nonsynonymous | 1 | 0 |
| SYPL1     | chr7 | 105752658/C//G | nonsynonymous | 1 | 0 |
| DGKI      | chr7 | 137237260/T//A | nonsynonymous | 1 | 0 |

|           |       |                |               |   |   |
|-----------|-------|----------------|---------------|---|---|
| DENND2A   | chr7  | 140302044/C//T | nonsynonymous | 1 | 0 |
| DLGAP2    | chr8  | 1624730/G//A   | nonsynonymous | 1 | 0 |
| DLC1      | chr8  | 13356861/G//T  | synonymous    | 1 | 0 |
| DPYSL2    | chr8  | 26439542/G//A  | nonsynonymous | 1 | 0 |
| KIF13B    | chr8  | 28928189/C//T  | synonymous    | 1 | 0 |
| IDO2      | chr8  | 39836595/C//A  | nonsynonymous | 1 | 0 |
| C8orf46   | chr8  | 67428153/G//A  | nonsynonymous | 1 | 0 |
| PUF60     | chr8  | 144904075/G//C | nonsynonymous | 1 | 0 |
| SMARCA2   | chr9  | 2104044/A//T   | nonsynonymous | 1 | 0 |
| SMARCA2   | chr9  | 2104046/C//G   | nonsynonymous | 1 | 0 |
| SMARCA2   | chr9  | 2104048/TA//T  | nonsynonymous | 1 | 0 |
| ERMP1     | chr9  | 5832756/G//A   | nonsynonymous | 1 | 0 |
| ADAMTSL1  | chr9  | 18826437/G//A  | nonsynonymous | 1 | 0 |
| TAF1L     | chr9  | 32633458/C//T  | nonsynonymous | 1 | 0 |
| TAF1L     | chr9  | 32634335/G//A  | nonsynonymous | 1 | 0 |
| CDK20     | chr9  | 90582395/G//C  | synonymous    | 1 | 0 |
| INVS      | chr9  | 103015410/G//C | nonsynonymous | 1 | 0 |
| SMC2      | chr9  | 106864732/G//A | nonsynonymous | 1 | 0 |
| NIPSNAP3B | chr9  | 107528692/G//C | nonsynonymous | 1 | 0 |
| EPB41L4B  | chr9  | 111936884/C//T | nonsynonymous | 1 | 0 |
| TRIM32    | chr9  | 119461152/C//G | synonymous    | 1 | 0 |
| GSN       | chr9  | 124074734/G//C | nonsynonymous | 1 | 0 |
| CFAP157   | chr9  | 130476161/G//A | nonsynonymous | 1 | 0 |
| VAV2      | chr9  | 136654418/C//T | synonymous    | 1 | 0 |
| ITIH5     | chr10 | 7621750/G//A   | synonymous    | 1 | 0 |
| FRMD4A    | chr10 | 14372081/G//T  | synonymous    | 1 | 0 |
| MYO3A     | chr10 | 26310551/C//T  | synonymous    | 1 | 0 |
| C10orf71  | chr10 | 50530719/C//G  | synonymous    | 1 | 0 |
| CDH23     | chr10 | 73573101/C//A  | nonsynonymous | 1 | 0 |
| OIT3      | chr10 | 74684188/G//T  | nonsynonymous | 1 | 0 |
| DLG5      | chr10 | 79581809/G//C  | nonsynonymous | 1 | 0 |
| RBP4      | chr10 | 95351861/C//T  | nonsynonymous | 1 | 0 |
| SORBS1    | chr10 | 97097042/G//C  | nonsynonymous | 1 | 0 |
| PSD       | chr10 | 104171502/C//T | nonsynonymous | 1 | 0 |
| ATRNL1    | chr10 | 116919928/G//C | synonymous    | 1 | 0 |
| SYT9      | chr11 | 7324416/C//A   | nonsynonymous | 1 | 0 |
| NLRP10    | chr11 | 7982074/G//C   | nonsynonymous | 1 | 0 |
|           | chr11 | 17409622/C//G  | synonymous    | 1 | 0 |
| OR8K5     | chr11 | 55927026/G//C  | synonymous    | 1 | 0 |
| P2RX3     | chr11 | 57106083/G//C  | nonsynonymous | 1 | 0 |
| DAGLA     | chr11 | 61503230/C//T  | nonsynonymous | 1 | 0 |
| ZNHIT2    | chr11 | 64884774/C//T  | nonsynonymous | 1 | 0 |
| XRRA1     | chr11 | 74562136/C//A  | nonsynonymous | 1 | 0 |
| ME3       | chr11 | 86198404/C//G  | nonsynonymous | 1 | 0 |
| CEP295    | chr11 | 93432770/G//A  | synonymous    | 1 | 0 |
| ANKK1     | chr11 | 113258676/G//T | nonsynonymous | 1 | 0 |
| PHLDB1    | chr11 | 118498017/C//G | synonymous    | 1 | 0 |
| MCAM      | chr11 | 119183111/C//T | nonsynonymous | 1 | 0 |
| NANOGNB   | chr12 | 7926531/T//A   | synonymous    | 1 | 0 |
|           | chr12 | 16747187/C//T  | synonymous    | 1 | 0 |
| GYS2      | chr12 | 21728859/C//A  | nonsynonymous | 1 | 0 |
| C12orf40  | chr12 | 40114708/C//T  | synonymous    | 1 | 0 |
| ADAMTS20  | chr12 | 43846406/C//G  | nonsynonymous | 1 | 0 |
| ADAMTS20  | chr12 | 43862441/G//C  | synonymous    | 1 | 0 |
| KCNH3     | chr12 | 49944005/C//T  | nonsynonymous | 1 | 0 |
|           | chr12 | 51695910/G//A  | synonymous    | 1 | 0 |
| NCKAP1L   | chr12 | 54925595/G//C  | nonsynonymous | 1 | 0 |
| OR6C6     | chr12 | 55688576/C//G  | nonsynonymous | 1 | 0 |
| PTPRB     | chr12 | 70953371/T//C  | nonsynonymous | 1 | 0 |
| TPH2      | chr12 | 72388307/C//G  | nonsynonymous | 1 | 0 |
| PTPRQ     | chr12 | 80981994/G//T  | nonsynonymous | 1 | 0 |
| TMTC2     | chr12 | 83324329/G//C  | synonymous    | 1 | 0 |
| VEZT      | chr12 | 95611552/A//T  | synonymous    | 1 | 0 |
| ANKS1B    | chr12 | 100048949/C//T | nonsynonymous | 1 | 0 |
| MYBPC1    | chr12 | 102061589/G//C | nonsynonymous | 1 | 0 |
| STAB2     | chr12 | 104064519/G//T | nonsynonymous | 1 | 0 |
| SVOP      | chr12 | 109372378/C//T | synonymous    | 1 | 0 |
| ACACB     | chr12 | 109617856/G//A | nonsynonymous | 1 | 0 |
| NOS1      | chr12 | 117768355/G//T | nonsynonymous | 1 | 0 |
| NCOR2     | chr12 | 124829341/C//G | nonsynonymous | 1 | 0 |

|                 |       |                |               |   |   |
|-----------------|-------|----------------|---------------|---|---|
| TMEM132B        | chr12 | 125811205/T//A | synonymous    | 1 | 0 |
| TUBA3C          | chr13 | 19751629/G//T  | nonsynonymous | 1 | 0 |
| FLT3            | chr13 | 28631597/C//A  | nonsynonymous | 1 | 0 |
| USPL1           | chr13 | 31211949/G//A  | nonsynonymous | 1 | 0 |
| TRIM13          | chr13 | 50586434/C//T  | nonsynonymous | 1 | 0 |
| WDFY2           | chr13 | 52277747/G//A  | nonsynonymous | 1 | 0 |
| TBC1D4          | chr13 | 75936709/G//C  | nonsynonymous | 1 | 0 |
| MYCBP2          | chr13 | 77667359/A//G  | synonymous    | 1 | 0 |
| RPGRIP1         | chr14 | 21756151/G//T  | nonsynonymous | 1 | 0 |
| ARHGAP5         | chr14 | 32561803/A//G  | nonsynonymous | 1 | 0 |
| INSM2           | chr14 | 36004501/C//G  | nonsynonymous | 1 | 0 |
| BMP4            | chr14 | 54418769/C//A  | nonsynonymous | 1 | 0 |
| RTN1            | chr14 | 60070604/G//A  | synonymous    | 1 | 0 |
| SGPP1           | chr14 | 64194075/G//C  | synonymous    | 1 | 0 |
| HSPA2           | chr14 | 65008818/C//G  | nonsynonymous | 1 | 0 |
| ELMSAN1         | chr14 | 74192785/C//A  | nonsynonymous | 1 | 0 |
| YLFPM1          | chr14 | 75266097/G//T  | nonsynonymous | 1 | 0 |
| SEL1L           | chr14 | 81993311/G//A  | synonymous    | 1 | 0 |
| MTMR10          | chr15 | 31235118/G//A  | nonsynonymous | 1 | 0 |
| NUTM1           | chr15 | 34649246/C//T  | nonsynonymous | 1 | 0 |
| INO80           | chr15 | 41313318/G//A  | synonymous    | 1 | 0 |
| TP53BP1         | chr15 | 43738643/C//T  | nonsynonymous | 1 | 0 |
| CEP152          | chr15 | 49081119/G//A  | nonsynonymous | 1 | 0 |
| SHC4            | chr15 | 49217114/C//G  | nonsynonymous | 1 | 0 |
| DMXL2           | chr15 | 51799381/G//C  | nonsynonymous | 1 | 0 |
| MNS1            | chr15 | 56757190/C//T  | synonymous    | 1 | 0 |
| HERC1           | chr15 | 63987061/C//G  | nonsynonymous | 1 | 0 |
| PEAK1           | chr15 | 77472801/C//G  | nonsynonymous | 1 | 0 |
| VPS33B          | chr15 | 91550210/C//T  | nonsynonymous | 1 | 0 |
| PGPEP1L         | chr15 | 99514273/G//A  | nonsynonymous | 1 | 0 |
| RNF151          | chr16 | 2018556/C//T   | nonsynonymous | 1 | 0 |
| CREBBP          | chr16 | 3900983/T//C   | nonsynonymous | 1 | 0 |
| MKL2            | chr16 | 14351988/G//A  | nonsynonymous | 1 | 0 |
| DCUN1D3         | chr16 | 20871385/G//A  | synonymous    | 1 | 0 |
| STX1B           | chr16 | 31008001/C//G  | synonymous    | 1 | 0 |
| PSMB10          | chr16 | 67970115/C//T  | synonymous    | 1 | 0 |
| TLDC1           | chr16 | 84520388/G//C  | synonymous    | 1 | 0 |
| FOXC2           | chr16 | 86601504/C//G  | nonsynonymous | 1 | 0 |
| ANKRD11         | chr16 | 89347088/G//A  | synonymous    | 1 | 0 |
| CHMP1A          | chr16 | 89712414/G//A  | synonymous    | 1 | 0 |
| TP53            | chr17 | 7577580/T//C   | nonsynonymous | 1 | 0 |
| MFSD6L          | chr17 | 8700909/G//C   | synonymous    | 1 | 0 |
| MYH1            | chr17 | 10399420/C//T  | synonymous    | 1 | 0 |
| DNAH9           | chr17 | 11713684/C//G  | nonsynonymous | 1 | 0 |
| UBB             | chr17 | 16285668/G//C  | synonymous    | 1 | 0 |
| GAS2L2          | chr17 | 34074917/T//G  | synonymous    | 1 | 0 |
| ACACA           | chr17 | 35597396/C//T  | synonymous    | 1 | 0 |
| KRT36           | chr17 | 39643837/G//A  | synonymous    | 1 | 0 |
| CRHR1-IT1-CRHR1 | chr17 | 43907504/C//T  | nonsynonymous | 1 | 0 |
| DDX42           | chr17 | 61864566/C//G  | nonsynonymous | 1 | 0 |
| KPNA2           | chr17 | 66038383/G//T  | nonsynonymous | 1 | 0 |
| KCNJ16          | chr17 | 68128754/C//T  | nonsynonymous | 1 | 0 |
| JMJD6           | chr17 | 74717909/C//A  | synonymous    | 1 | 0 |
| BAHCC1          | chr17 | 79410341/G//T  | nonsynonymous | 1 | 0 |
| THOC1           | chr18 | 214879/A//G    | nonsynonymous | 1 | 0 |
| METTL4          | chr18 | 2567147/G//C   | nonsynonymous | 1 | 0 |
| EPB41L3         | chr18 | 5416267/C//T   | synonymous    | 1 | 0 |
| NPC1            | chr18 | 21124325/G//C  | nonsynonymous | 1 | 0 |
| DSC2            | chr18 | 28648974/C//A  | synonymous    | 1 | 0 |
| DSG1            | chr18 | 28919908/C//A  | nonsynonymous | 1 | 0 |
| DTNA            | chr18 | 32418063/C//A  | nonsynonymous | 1 | 0 |
| CELF4           | chr18 | 35145406/C//T  | nonsynonymous | 1 | 0 |
| CDH20           | chr18 | 59195273/T//A  | nonsynonymous | 1 | 0 |
| SERPINB12       | chr18 | 61232681/G//A  | nonsynonymous | 1 | 0 |
| CDH7            | chr18 | 63430135/G//T  | synonymous    | 1 | 0 |
| CCDC102B        | chr18 | 66504517/C//A  | nonsynonymous | 1 | 0 |
| NETO1           | chr18 | 70461607/G//A  | nonsynonymous | 1 | 0 |
|                 | chr18 | 72515917/C//G  | synonymous    | 1 | 0 |
| ZNF556          | chr19 | 2877456/G//C   | nonsynonymous | 1 | 0 |
| TJP3            | chr19 | 3747998/C//T   | synonymous    | 1 | 0 |

|          |       |                |               |   |   |
|----------|-------|----------------|---------------|---|---|
| LONP1    | chr19 | 5719727/G//C   | nonsynonymous | 1 | 0 |
| ARHGEF18 | chr19 | 7535055/C//T   | synonymous    | 1 | 0 |
| C19orf45 | chr19 | 7566083/C//G   | synonymous    | 1 | 0 |
| ZNF564   | chr19 | 12638467/G//A  | nonsynonymous | 1 | 0 |
| ZNF490   | chr19 | 12721450/G//C  | synonymous    | 1 | 0 |
| PKN1     | chr19 | 14574716/C//G  | synonymous    | 1 | 0 |
| CYP4F12  | chr19 | 15806826/C//G  | nonsynonymous | 1 | 0 |
| MYO9B    | chr19 | 17321599/G//A  | nonsynonymous | 1 | 0 |
| PIK3R2   | chr19 | 18278074/C//T  | nonsynonymous | 1 | 0 |
| LRP3     | chr19 | 33697178/C//T  | nonsynonymous | 1 | 0 |
| USF2     | chr19 | 35760872/C//G  | nonsynonymous | 1 | 0 |
| FFAR1    | chr19 | 35842963/G//T  | nonsynonymous | 1 | 0 |
| RBM42    | chr19 | 36128086/C//G  | nonsynonymous | 1 | 0 |
| POLR21   | chr19 | 36605737/C//G  | nonsynonymous | 1 | 0 |
| HKR1     | chr19 | 37853512/C//T  | nonsynonymous | 1 | 0 |
| EIF3K    | chr19 | 39125632/G//C  | nonsynonymous | 1 | 0 |
| ZNF526   | chr19 | 42729156/G//C  | nonsynonymous | 1 | 0 |
| CIC      | chr19 | 42794881/C//G  | nonsynonymous | 1 | 0 |
| ZNF155   | chr19 | 44500277/C//T  | nonsynonymous | 1 | 0 |
| SYMPK    | chr19 | 46338380/G//A  | nonsynonymous | 1 | 0 |
| ZNF497   | chr19 | 58867517/G//A  | synonymous    | 1 | 0 |
| ZNF497   | chr19 | 58868237/G//A  | synonymous    | 1 | 0 |
| PCNA     | chr20 | 5100319/C//G   | synonymous    | 1 | 0 |
| CDK5RAP1 | chr20 | 31954740/G//A  | synonymous    | 1 | 0 |
| SRC      | chr20 | 36026096/C//G  | synonymous    | 1 | 0 |
| KIAA1755 | chr20 | 36841902/C//T  | nonsynonymous | 1 | 0 |
| KIAA1755 | chr20 | 36856595/C//G  | nonsynonymous | 1 | 0 |
| TTPAL    | chr20 | 43117912/C//A  | synonymous    | 1 | 0 |
| DNTTIP1  | chr20 | 44433984/C//T  | synonymous    | 1 | 0 |
| ZMYND8   | chr20 | 45976607/G//A  | synonymous    | 1 | 0 |
| PREX1    | chr20 | 47276499/G//T  | nonsynonymous | 1 | 0 |
| SLC17A9  | chr20 | 61598069/G//T  | nonsynonymous | 1 | 0 |
| COL20A1  | chr20 | 61944141/C//T  | synonymous    | 1 | 0 |
| NCAM2    | chr21 | 22652925/G//T  | nonsynonymous | 1 | 0 |
| TTC3     | chr21 | 38573738/C//T  | synonymous    | 1 | 0 |
| ZBTB21   | chr21 | 43411101/G//A  | nonsynonymous | 1 | 0 |
| TRPM2    | chr21 | 45855102/T//A  | nonsynonymous | 1 | 0 |
| ZNF280A  | chr22 | 22868851/G//T  | synonymous    | 1 | 0 |
| NEFH     | chr22 | 29886138/G//C  | nonsynonymous | 1 | 0 |
| SEC14L3  | chr22 | 30857333/C//G  | nonsynonymous | 1 | 0 |
| KCNJ4    | chr22 | 38823441/C//A  | nonsynonymous | 1 | 0 |
| CELSR1   | chr22 | 46931990/C//T  | nonsynonymous | 1 | 0 |
| GRAMD4   | chr22 | 47070582/C//T  | synonymous    | 1 | 0 |
| PPP6R2   | chr22 | 50857359/C//G  | nonsynonymous | 1 | 0 |
| STS      | chrX  | 7171243/G//A   | nonsynonymous | 1 | 0 |
| DMD      | chrX  | 31496480/C//T  | nonsynonymous | 1 | 0 |
| BCOR     | chrX  | 39930385/C//G  | nonsynonymous | 1 | 0 |
| UBA1     | chrX  | 47058662/A//G  | synonymous    | 1 | 0 |
| GPR173   | chrX  | 53105836/G//C  | synonymous    | 1 | 0 |
| DIAPH2   | chrX  | 96369772/C//G  | nonsynonymous | 1 | 0 |
| H2BFWT   | chrX  | 103268009/T//C | nonsynonymous | 1 | 0 |
| CXorf66  | chrX  | 139038159/C//T | nonsynonymous | 1 | 0 |
| FAM50A   | chrX  | 153677643/G//C | synonymous    | 1 | 0 |
| COL3A1   | chr2  | 189872824/G//A | nonsynonymous | 0 | 1 |
| ANKAR    | chr2  | 190560987/T//C | nonsynonymous | 0 | 1 |
| OTOL1    | chr3  | 161221011/G//A | nonsynonymous | 0 | 1 |
| GYPA     | chr4  | 145038032/G//A | nonsynonymous | 0 | 1 |
| ATP10B   | chr5  | 160039910/C//T | synonymous    | 0 | 1 |
| FAM71F1  | chr7  | 128371177/C//T | synonymous    | 0 | 1 |
| TRIM49B  | chr11 | 49057845/C//T  | synonymous    | 0 | 1 |
| KANSL2   | chr12 | 49065687/G//A  | nonsynonymous | 0 | 1 |
| SYT1     | chr12 | 79679661/G//A  | synonymous    | 0 | 1 |
| FNDC3A   | chr13 | 49742767/T//C  | synonymous    | 0 | 1 |
| C16orf62 | chr16 | 19693720/A//G  | synonymous    | 0 | 1 |
| CDH8     | chr16 | 61761126/G//A  | synonymous    | 0 | 1 |
| KRT13    | chr17 | 39659342/C//T  | synonymous    | 0 | 1 |
| ZNF708   | chr19 | 21477189/T//C  | synonymous    | 0 | 1 |
| LILRA2   | chr19 | 55085760/C//T  | synonymous    | 0 | 1 |
| BRSK1    | chr19 | 55814164/C//T  | synonymous    | 0 | 1 |
| RBBP9    | chr20 | 18477719/C//T  | synonymous    | 0 | 1 |

|           |       |                |               |   |   |
|-----------|-------|----------------|---------------|---|---|
| TAB1      | chr22 | 39811633/C//T  | nonsynonymous | 0 | 1 |
| SLITRK4   | chrX  | 142718857/G//A | nonsynonymous | 0 | 1 |
| PLCH2     | chr1  | 2428368/T//C   | nonsynonymous | 0 | 1 |
| CHD5      | chr1  | 6181185/G//A   | nonsynonymous | 0 | 1 |
| ARHGEF10L | chr1  | 17964397/G//A  | nonsynonymous | 0 | 1 |
| SLC30A2   | chr1  | 26365741/C//T  | synonymous    | 0 | 1 |
| OPRD1     | chr1  | 29189248/G//T  | synonymous    | 0 | 1 |
| TMEM125   | chr1  | 43739056/G//A  | synonymous    | 0 | 1 |
| ZFYVE9    | chr1  | 52704941/C//T  | nonsynonymous | 0 | 1 |
| GLIS1     | chr1  | 54060134/C//T  | nonsynonymous | 0 | 1 |
| L1TD1     | chr1  | 62675709/T//C  | synonymous    | 0 | 1 |
| DPYD      | chr1  | 97915746/G//A  | nonsynonymous | 0 | 1 |
| TSPAN2    | chr1  | 115600176/C//T | synonymous    | 0 | 1 |
| CD101     | chr1  | 117559832/T//C | nonsynonymous | 0 | 1 |
| GBA       | chr1  | 155206170/C//G | nonsynonymous | 0 | 1 |
| RGSL1     | chr1  | 182443666/G//A | nonsynonymous | 0 | 1 |
| SNTG2     | chr2  | 1320038/A//G   | nonsynonymous | 0 | 1 |
| TPO       | chr2  | 1507752/C//T   | nonsynonymous | 0 | 1 |
| DTNB      | chr2  | 25655874/G//A  | synonymous    | 0 | 1 |
| AGBL5     | chr2  | 27279641/G//A  | nonsynonymous | 0 | 1 |
| XDH       | chr2  | 31596802/G//A  | synonymous    | 0 | 1 |
| LTBP1     | chr2  | 33590543/T//G  | nonsynonymous | 0 | 1 |
| SRBD1     | chr2  | 45647000/G//A  | synonymous    | 0 | 1 |
| EML6      | chr2  | 55074705/G//A  | nonsynonymous | 0 | 1 |
| ACTR2     | chr2  | 65473721/G//A  | nonsynonymous | 0 | 1 |
| KANSL3    | chr2  | 97267886/G//A  | nonsynonymous | 0 | 1 |
| VWA3B     | chr2  | 98928456/C//T  | synonymous    | 0 | 1 |
| ST6GAL2   | chr2  | 107459888/C//T | synonymous    | 0 | 1 |
| POLR1B    | chr2  | 113309425/G//A | nonsynonymous | 0 | 1 |
| MARCO     | chr2  | 119752009/G//A | synonymous    | 0 | 1 |
| INHBB     | chr2  | 121107494/C//T | synonymous    | 0 | 1 |
| GLI2      | chr2  | 121554883/G//C | synonymous    | 0 | 1 |
| SMPD4     | chr2  | 130910154/C//T | nonsynonymous | 0 | 1 |
| AMER3     | chr2  | 131521549/C//T | nonsynonymous | 0 | 1 |
| SCN1A     | chr2  | 166850913/C//T | nonsynonymous | 0 | 1 |
| XIRP2     | chr2  | 168100329/G//T | nonsynonymous | 0 | 1 |
| TTN       | chr2  | 179489342/C//T | nonsynonymous | 0 | 1 |
| TTN       | chr2  | 179578733/T//A | synonymous    | 0 | 1 |
|           | chr2  | 179614551/C//T | synonymous    | 0 | 1 |
|           | chr2  | 179614778/C//T | synonymous    | 0 | 1 |
| UBE2E3    | chr2  | 181927682/A//G | synonymous    | 0 | 1 |
| ZNF804A   | chr2  | 185803675/C//T | synonymous    | 0 | 1 |
| FSIP2     | chr2  | 186668103/G//A | synonymous    | 0 | 1 |
| DNAH7     | chr2  | 196682511/C//T | nonsynonymous | 0 | 1 |
| DNAH7     | chr2  | 196824997/C//T | nonsynonymous | 0 | 1 |
| PLCL1     | chr2  | 198948531/G//A | nonsynonymous | 0 | 1 |
| FAM117B   | chr2  | 203622149/C//T | nonsynonymous | 0 | 1 |
| ZDBF2     | chr2  | 207169608/C//T | nonsynonymous | 0 | 1 |
| PTPRN     | chr2  | 220167031/T//C | synonymous    | 0 | 1 |
| COL4A4    | chr2  | 227924234/C//T | nonsynonymous | 0 | 1 |
| COL4A4    | chr2  | 227966607/C//T | nonsynonymous | 0 | 1 |
| SLC16A14  | chr2  | 230923873/G//A | nonsynonymous | 0 | 1 |
| SP110     | chr2  | 231037580/G//A | synonymous    | 0 | 1 |
| UGT1A3    | chr2  | 234638302/C//T | nonsynonymous | 0 | 1 |
| ITPR1     | chr3  | 4735247/T//A   | nonsynonymous | 0 | 1 |
| GRM7      | chr3  | 7782124/G//A   | synonymous    | 0 | 1 |
| BRPF1     | chr3  | 9785404/C//T   | synonymous    | 0 | 1 |
| MLH1      | chr3  | 37090106/T//A  | synonymous    | 0 | 1 |
| CX3CR1    | chr3  | 39307580/G//T  | synonymous    | 0 | 1 |
| ZNF660    | chr3  | 44636445/G//A  | nonsynonymous | 0 | 1 |
| DUSP7     | chr3  | 52084895/T//C  | nonsynonymous | 0 | 1 |
| ERC2      | chr3  | 56044569/C//T  | nonsynonymous | 0 | 1 |
| DNAH12    | chr3  | 57327840/C//T  | nonsynonymous | 0 | 1 |
| FAM19A1   | chr3  | 68593678/G//A  | synonymous    | 0 | 1 |
| OR5H6     | chr3  | 97983134/C//T  | synonymous    | 0 | 1 |
| MYH15     | chr3  | 108218295/C//T | synonymous    | 0 | 1 |
| KALRN     | chr3  | 124385899/C//T | nonsynonymous | 0 | 1 |
| KALRN     | chr3  | 124413289/G//A | nonsynonymous | 0 | 1 |
| TF        | chr3  | 133472531/C//T | synonymous    | 0 | 1 |
| IGSF10    | chr3  | 151164158/G//A | nonsynonymous | 0 | 1 |

|           |      |                |               |   |   |
|-----------|------|----------------|---------------|---|---|
| WDR49     | chr3 | 167196602/C//T | synonymous    | 0 | 1 |
| GHSR      | chr3 | 172163253/C//G | nonsynonymous | 0 | 1 |
| HTT       | chr4 | 3136260/G//T   | nonsynonymous | 0 | 1 |
| GPR78     | chr4 | 8582779/G//A   | nonsynonymous | 0 | 1 |
| RHOH      | chr4 | 40244970/G//A  | synonymous    | 0 | 1 |
| NIPAL1    | chr4 | 48038100/G//A  | nonsynonymous | 0 | 1 |
| UGT2B28   | chr4 | 70146860/G//A  | nonsynonymous | 0 | 1 |
| UGT2B4    | chr4 | 70346551/C//T  | nonsynonymous | 0 | 1 |
| ENAM      | chr4 | 71507988/A//C  | nonsynonymous | 0 | 1 |
| FRAS1     | chr4 | 79440574/C//T  | synonymous    | 0 | 1 |
| FRAS1     | chr4 | 79462330/G//A  | synonymous    | 0 | 1 |
| GK2       | chr4 | 80327860/G//A  | nonsynonymous | 0 | 1 |
| STPG2     | chr4 | 98893466/C//T  | nonsynonymous | 0 | 1 |
| TACR3     | chr4 | 104511147/G//A | nonsynonymous | 0 | 1 |
| FAT4      | chr4 | 126373145/C//T | synonymous    | 0 | 1 |
| LRBA      | chr4 | 151207169/G//A | nonsynonymous | 0 | 1 |
| DCHS2     | chr4 | 155225899/C//T | nonsynonymous | 0 | 1 |
| GLRB      | chr4 | 158057999/C//T | nonsynonymous | 0 | 1 |
| NPY1R     | chr4 | 164246500/G//A | synonymous    | 0 | 1 |
| WDR17     | chr4 | 177083218/C//T | synonymous    | 0 | 1 |
| TENM3     | chr4 | 183673180/C//T | nonsynonymous | 0 | 1 |
| PRIMPOL   | chr4 | 185580515/G//A | nonsynonymous | 0 | 1 |
| ACSL1     | chr4 | 185678832/A//G | nonsynonymous | 0 | 1 |
| SORBS2    | chr4 | 186544118/T//C | nonsynonymous | 0 | 1 |
| TRIML1    | chr4 | 189068145/C//T | synonymous    | 0 | 1 |
| TRIP13    | chr5 | 908566/C//G    | nonsynonymous | 0 | 1 |
| TERT      | chr5 | 1254627/G//A   | synonymous    | 0 | 1 |
| RAI14     | chr5 | 34824414/C//T  | nonsynonymous | 0 | 1 |
| EGFLAM    | chr5 | 38409148/G//A  | nonsynonymous | 0 | 1 |
| C7        | chr5 | 40959612/A//T  | nonsynonymous | 0 | 1 |
| PLCXD3    | chr5 | 41382624/G//A  | nonsynonymous | 0 | 1 |
| SNX18     | chr5 | 53815498/A//T  | synonymous    | 0 | 1 |
| DMGDH     | chr5 | 78328564/G//A  | nonsynonymous | 0 | 1 |
| ANKRD34B  | chr5 | 79855227/C//T  | synonymous    | 0 | 1 |
| RASGRF2   | chr5 | 80388761/G//A  | nonsynonymous | 0 | 1 |
| ADGRV1    | chr5 | 90008209/C//T  | nonsynonymous | 0 | 1 |
| NREP      | chr5 | 111066608/G//A | synonymous    | 0 | 1 |
| FAM170A   | chr5 | 118965335/G//A | synonymous    | 0 | 1 |
| CDKL3     | chr5 | 133648042/C//T | synonymous    | 0 | 1 |
| TRPC7     | chr5 | 135567150/G//A | synonymous    | 0 | 1 |
| PCDHA8    | chr5 | 140222859/G//A | synonymous    | 0 | 1 |
| PCDHA10   | chr5 | 140235951/G//A | synonymous    | 0 | 1 |
| PCDHGA1   | chr5 | 140711414/G//A | nonsynonymous | 0 | 1 |
| SPRY4     | chr5 | 141693909/G//A | synonymous    | 0 | 1 |
| SYNPO     | chr5 | 150028681/C//T | nonsynonymous | 0 | 1 |
| GPX3      | chr5 | 150407685/G//A | synonymous    | 0 | 1 |
| SLC36A2   | chr5 | 150722526/C//T | nonsynonymous | 0 | 1 |
| NMUR2     | chr5 | 151771983/C//T | synonymous    | 0 | 1 |
| TIMD4     | chr5 | 156378573/G//A | nonsynonymous | 0 | 1 |
| ZNF354A   | chr5 | 178152459/G//A | synonymous    | 0 | 1 |
| MAML1     | chr5 | 179201473/C//T | synonymous    | 0 | 1 |
| SYCP2L    | chr6 | 10924851/C//T  | nonsynonymous | 0 | 1 |
| SYCP2L    | chr6 | 10928651/C//T  | nonsynonymous | 0 | 1 |
| OR2H1     | chr6 | 29430333/C//T  | nonsynonymous | 0 | 1 |
| NEU1      | chr6 | 31829180/G//A  | nonsynonymous | 0 | 1 |
| CUL9      | chr6 | 43153904/G//A  | nonsynonymous | 0 | 1 |
| COL21A1   | chr6 | 56033060/G//A  | synonymous    | 0 | 1 |
| DDX43     | chr6 | 74110056/G//A  | nonsynonymous | 0 | 1 |
| SCML4     | chr6 | 108067916/C//T | nonsynonymous | 0 | 1 |
| AK9       | chr6 | 109885451/G//A | nonsynonymous | 0 | 1 |
| TMEM200A  | chr6 | 130763029/G//A | nonsynonymous | 0 | 1 |
|           | chr6 | 134213066/C//G | synonymous    | 0 | 1 |
| ARID1B    | chr6 | 157405868/G//A | nonsynonymous | 0 | 1 |
| ZDHHC14   | chr6 | 157963612/G//A | synonymous    | 0 | 1 |
| SYNJ2     | chr6 | 158497676/G//A | nonsynonymous | 0 | 1 |
| TMEM181   | chr6 | 158957722/A//C | nonsynonymous | 0 | 1 |
| GET4      | chr7 | 927147/C//T    | synonymous    | 0 | 1 |
| DNAH11    | chr7 | 21818642/G//A  | nonsynonymous | 0 | 1 |
| ADCYAP1R1 | chr7 | 31126109/C//T  | nonsynonymous | 0 | 1 |
| KBTBD2    | chr7 | 32910246/G//A  | nonsynonymous | 0 | 1 |

|          |       |                |               |   |   |
|----------|-------|----------------|---------------|---|---|
| ADCY1    | chr7  | 45662327/C//T  | synonymous    | 0 | 1 |
| ADCY1    | chr7  | 45743249/C//T  | synonymous    | 0 | 1 |
| SAMD9    | chr7  | 92734014/G//A  | nonsynonymous | 0 | 1 |
| CALCR    | chr7  | 93098063/G//A  | nonsynonymous | 0 | 1 |
| CYP3A4   | chr7  | 99358551/C//T  | nonsynonymous | 0 | 1 |
| SLC26A3  | chr7  | 107414384/G//A | nonsynonymous | 0 | 1 |
| PRSS58   | chr7  | 141952127/C//T | nonsynonymous | 0 | 1 |
| BLK      | chr8  | 11406632/G//A  | nonsynonymous | 0 | 1 |
| FGL1     | chr8  | 17743049/G//A  | synonymous    | 0 | 1 |
|          | chr8  | 32505611/G//A  | synonymous    | 0 | 1 |
| KAT6A    | chr8  | 41834550/A//C  | nonsynonymous | 0 | 1 |
| RP1      | chr8  | 55533742/G//A  | synonymous    | 0 | 1 |
| RP1      | chr8  | 55533769/G//A  | synonymous    | 0 | 1 |
| XKR4     | chr8  | 56435915/G//A  | nonsynonymous | 0 | 1 |
| PDE7A    | chr8  | 66635783/G//A  | synonymous    | 0 | 1 |
| KCNB2    | chr8  | 73849846/C//T  | synonymous    | 0 | 1 |
| ZFHX4    | chr8  | 77766710/C//T  | nonsynonymous | 0 | 1 |
| ZFPM2    | chr8  | 106813886/C//T | nonsynonymous | 0 | 1 |
| MTBP     | chr8  | 121514750/C//T | nonsynonymous | 0 | 1 |
| POU5F1B  | chr8  | 128428104/C//T | synonymous    | 0 | 1 |
| PHF20L1  | chr8  | 133829667/C//T | nonsynonymous | 0 | 1 |
| PTPRD    | chr9  | 8375953/C//T   | synonymous    | 0 | 1 |
| TEK      | chr9  | 27203112/C//T  | nonsynonymous | 0 | 1 |
| RECK     | chr9  | 36087870/C//T  | nonsynonymous | 0 | 1 |
| GRIN3A   | chr9  | 104499726/G//A | nonsynonymous | 0 | 1 |
| ZNF462   | chr9  | 109689872/C//T | nonsynonymous | 0 | 1 |
| TXNDC8   | chr9  | 113100108/C//T | synonymous    | 0 | 1 |
| MUSK     | chr9  | 113496561/C//T | nonsynonymous | 0 | 1 |
| COL27A1  | chr9  | 116930567/C//T | synonymous    | 0 | 1 |
| PTGS1    | chr9  | 125154632/C//A | nonsynonymous | 0 | 1 |
| DENND1A  | chr9  | 126429324/A//G | nonsynonymous | 0 | 1 |
| OLFML2A  | chr9  | 127572289/G//A | synonymous    | 0 | 1 |
| SOHLH1   | chr9  | 138585425/C//T | synonymous    | 0 | 1 |
| HKDC1    | chr10 | 70987081/T//G  | nonsynonymous | 0 | 1 |
| ZFYVE27  | chr10 | 99510220/C//T  | nonsynonymous | 0 | 1 |
| PSD      | chr10 | 104176568/G//A | synonymous    | 0 | 1 |
| PLEKHS1  | chr10 | 115528614/C//T | nonsynonymous | 0 | 1 |
| HTRA1    | chr10 | 124273755/C//T | synonymous    | 0 | 1 |
| CHST15   | chr10 | 125804253/C//T | synonymous    | 0 | 1 |
| MKI67    | chr10 | 129905780/G//A | synonymous    | 0 | 1 |
| SLC22A18 | chr11 | 2924650/C//T   | synonymous    | 0 | 1 |
| ART5     | chr11 | 3660251/C//T   | nonsynonymous | 0 | 1 |
| OR52J3   | chr11 | 5067800/C//T   | synonymous    | 0 | 1 |
| NLRP10   | chr11 | 7981578/C//T   | synonymous    | 0 | 1 |
| RPL27A   | chr11 | 8704302/CG//C  | synonymous    | 0 | 1 |
| DGKZ     | chr11 | 46397632/T//A  | synonymous    | 0 | 1 |
| OR4C46   | chr11 | 51515461/C//T  | synonymous    | 0 | 1 |
| SLC43A1  | chr11 | 57256440/G//A  | nonsynonymous | 0 | 1 |
| OR10Q1   | chr11 | 57996108/C//T  | synonymous    | 0 | 1 |
| GLYATL2  | chr11 | 58601929/C//T  | nonsynonymous | 0 | 1 |
| LGALS12  | chr11 | 63283733/C//T  | synonymous    | 0 | 1 |
| SART1    | chr11 | 65733659/C//T  | synonymous    | 0 | 1 |
| GAL3ST3  | chr11 | 65811027/G//A  | synonymous    | 0 | 1 |
| LRFN4    | chr11 | 66627606/C//T  | synonymous    | 0 | 1 |
| SHANK2   | chr11 | 70653177/G//A  | synonymous    | 0 | 1 |
| P2RY2    | chr11 | 72945667/G//T  | nonsynonymous | 0 | 1 |
| INTS4    | chr11 | 77692623/C//T  | nonsynonymous | 0 | 1 |
| SLC6A12  | chr12 | 305982/G//A    | nonsynonymous | 0 | 1 |
| PRMT8    | chr12 | 3659116/T//C   | synonymous    | 0 | 1 |
| CRACR2A  | chr12 | 3782690/T//C   | nonsynonymous | 0 | 1 |
| GRIN2B   | chr12 | 13716857/G//A  | synonymous    | 0 | 1 |
| GRIN2B   | chr12 | 13769599/A//T  | synonymous    | 0 | 1 |
| PTPRO    | chr12 | 15734642/G//A  | synonymous    | 0 | 1 |
| CASC1    | chr12 | 25311453/C//T  | nonsynonymous | 0 | 1 |
| PDZRN4   | chr12 | 41587911/G//A  | nonsynonymous | 0 | 1 |
| AMIGO2   | chr12 | 47471999/A//G  | nonsynonymous | 0 | 1 |
| AMIGO2   | chr12 | 47472073/G//A  | nonsynonymous | 0 | 1 |
| KMT2D    | chr12 | 49435127/G//A  | synonymous    | 0 | 1 |
| FAM186A  | chr12 | 50745280/C//T  | nonsynonymous | 0 | 1 |
| TFCP2    | chr12 | 51566103/C//A  | nonsynonymous | 0 | 1 |

|           |       |                |               |   |   |
|-----------|-------|----------------|---------------|---|---|
| BEST3     | chr12 | 70049329/G//A  | synonymous    | 0 | 1 |
| PHLDA1    | chr12 | 76424287/T//A  | synonymous    | 0 | 1 |
| PTPRQ     | chr12 | 80839335/G//A  | nonsynonymous | 0 | 1 |
| RASSF9    | chr12 | 86198958/C//T  | nonsynonymous | 0 | 1 |
| TMPO      | chr12 | 98927753/A//C  | nonsynonymous | 0 | 1 |
| STAB2     | chr12 | 104126961/G//A | nonsynonymous | 0 | 1 |
| ISCU      | chr12 | 108961025/C//T | synonymous    | 0 | 1 |
| FAM109A   | chr12 | 111800556/G//A | nonsynonymous | 0 | 1 |
| OAS2      | chr12 | 113424940/G//A | nonsynonymous | 0 | 1 |
| KSR2      | chr12 | 117992969/C//T | synonymous    | 0 | 1 |
| HNF1A     | chr12 | 121416602/G//A | nonsynonymous | 0 | 1 |
| FLT3      | chr13 | 28636066/G//A  | synonymous    | 0 | 1 |
| KLHL1     | chr13 | 70413255/C//T  | nonsynonymous | 0 | 1 |
| COL4A1    | chr13 | 110826993/G//A | nonsynonymous | 0 | 1 |
| GRK1      | chr13 | 114321926/C//T | synonymous    | 0 | 1 |
| JPH4      | chr14 | 24040285/G//A  | nonsynonymous | 0 | 1 |
| DLL4      | chr15 | 41228477/G//A  | nonsynonymous | 0 | 1 |
| JMJD7     | chr15 | 42128991/C//T  | nonsynonymous | 0 | 1 |
| LRRC57    | chr15 | 42840614/G//A  | nonsynonymous | 0 | 1 |
| SORD      | chr15 | 45353299/A//T  | synonymous    | 0 | 1 |
| MAPK6     | chr15 | 52339162/A//G  | nonsynonymous | 0 | 1 |
| MAP2K5    | chr15 | 67842423/A//T  | synonymous    | 0 | 1 |
| NOX5      | chr15 | 69348989/G//A  | nonsynonymous | 0 | 1 |
| PPCDC     | chr15 | 75320597/C//T  | synonymous    | 0 | 1 |
| SCAPER    | chr15 | 77057343/G//A  | nonsynonymous | 0 | 1 |
| CHRN4     | chr15 | 78917469/G//A  | synonymous    | 0 | 1 |
| DET1      | chr15 | 89070909/G//A  | nonsynonymous | 0 | 1 |
| IDH2      | chr15 | 90628316/G//T  | nonsynonymous | 0 | 1 |
| SLCO3A1   | chr15 | 92669283/C//T  | synonymous    | 0 | 1 |
| GRIN2A    | chr16 | 9892190/T//A   | nonsynonymous | 0 | 1 |
| MKL2      | chr16 | 14340836/G//A  | synonymous    | 0 | 1 |
| XYLT1     | chr16 | 17211721/A//T  | nonsynonymous | 0 | 1 |
| SYT17     | chr16 | 19195159/C//T  | nonsynonymous | 0 | 1 |
| C17orf107 | chr17 | 4805148/C//T   | synonymous    | 0 | 1 |
| USP6      | chr17 | 5072213/G//A   | nonsynonymous | 0 | 1 |
| PFAS      | chr17 | 8157579/C//T   | nonsynonymous | 0 | 1 |
| DNAH9     | chr17 | 11671886/C//T  | synonymous    | 0 | 1 |
| DNAH9     | chr17 | 11790213/G//A  | synonymous    | 0 | 1 |
| FLCN      | chr17 | 17131337/G//A  | nonsynonymous | 0 | 1 |
| MYO15A    | chr17 | 18049396/C//T  | nonsynonymous | 0 | 1 |
| MIEF2     | chr17 | 18168135/C//T  | synonymous    | 0 | 1 |
| FAM83G    | chr17 | 18881680/G//A  | synonymous    | 0 | 1 |
| NUFIP2    | chr17 | 27621090/G//A  | synonymous    | 0 | 1 |
| ARHGAP23  | chr17 | 36623042/C//T  | nonsynonymous | 0 | 1 |
| KRT17     | chr17 | 39775939/C//T  | synonymous    | 0 | 1 |
| CNP       | chr17 | 40120746/G//A  | nonsynonymous | 0 | 1 |
| FAM134C   | chr17 | 40735557/G//A  | nonsynonymous | 0 | 1 |
| KIF18B    | chr17 | 43003834/G//A  | synonymous    | 0 | 1 |
| SCN4A     | chr17 | 62018761/G//A  | synonymous    | 0 | 1 |
| AXIN2     | chr17 | 63533737/G//A  | nonsynonymous | 0 | 1 |
|           | chr17 | 65882347/C//T  | synonymous    | 0 | 1 |
| GRIN2C    | chr17 | 72848489/C//T  | nonsynonymous | 0 | 1 |
| PIK3C3    | chr18 | 39584455/C//T  | nonsynonymous | 0 | 1 |
| RIT2      | chr18 | 40695401/T//A  | synonymous    | 0 | 1 |
| ELOA2     | chr18 | 44560659/C//T  | nonsynonymous | 0 | 1 |
| SERPINB12 | chr18 | 61233843/G//A  | nonsynonymous | 0 | 1 |
| SERPINB3  | chr18 | 61326713/C//T  | nonsynonymous | 0 | 1 |
| SHD       | chr19 | 4290474/C//T   | synonymous    | 0 | 1 |
| CHAF1A    | chr19 | 4433433/C//T   | nonsynonymous | 0 | 1 |
| ACSBG2    | chr19 | 6183050/G//A   | synonymous    | 0 | 1 |
| MUC16     | chr19 | 9047872/C//T   | synonymous    | 0 | 1 |
| MUC16     | chr19 | 9066569/G//A   | synonymous    | 0 | 1 |
| MUC16     | chr19 | 9076530/C//A   | nonsynonymous | 0 | 1 |
| MUC16     | chr19 | 9087450/G//A   | synonymous    | 0 | 1 |
| PRKACA    | chr19 | 14208406/C//T  | synonymous    | 0 | 1 |
| SYDE1     | chr19 | 15224595/C//T  | nonsynonymous | 0 | 1 |
| NOTCH3    | chr19 | 15271884/G//A  | synonymous    | 0 | 1 |
| CYP4F3    | chr19 | 15757879/G//A  | nonsynonymous | 0 | 1 |
|           | chr19 | 15791160/G//A  | synonymous    | 0 | 1 |
| EPS15L1   | chr19 | 16497011/G//A  | nonsynonymous | 0 | 1 |



|           |       |                       |               |   |   |
|-----------|-------|-----------------------|---------------|---|---|
| COMP      | chr19 | 18893907/G//A         | synonymous    | 0 | 1 |
| ZNF90     | chr19 | 20228644/C//T         | nonsynonymous | 0 | 1 |
| ZNF99     | chr19 | 22940859/T//A         | nonsynonymous | 0 | 1 |
| FAM187B   | chr19 | 35716061/G//A         | synonymous    | 0 | 1 |
| ATP4A     | chr19 | 36046336/G//A         | synonymous    | 0 | 1 |
| THAP8     | chr19 | 36526359/G//A         | nonsynonymous | 0 | 1 |
| ZNF260    | chr19 | 37005847/G//A         | synonymous    | 0 | 1 |
| CATSPERG  | chr19 | 38855605/G//A         | synonymous    | 0 | 1 |
| LRFN1     | chr19 | 39805113/G//A         | synonymous    | 0 | 1 |
| CYP2A7    | chr19 | 41381556/C//T         | synonymous    | 0 | 1 |
| CEACAM19  | chr19 | 45179640/C//T         | synonymous    | 0 | 1 |
| EML2-AS1  | chr19 | 46145533/C//T         | synonymous    | 0 | 1 |
| TRPM4     | chr19 | 49685858/C//T         | synonymous    | 0 | 1 |
| ZNF534    | chr19 | 52941227/T//A         | nonsynonymous | 0 | 1 |
| VN1R2     | chr19 | 53762045/C//T         | synonymous    | 0 | 1 |
| LILRA5    | chr19 | 54818745/G//A         | nonsynonymous | 0 | 1 |
| LILRA1    | chr19 | 55112178/G//A         | nonsynonymous | 0 | 1 |
| ZNF628    | chr19 | 55995769/G//A         | synonymous    | 0 | 1 |
| CCDC106   | chr19 | 56162764/C//T         | synonymous    | 0 | 1 |
| ZSCAN5A   | chr19 | 56735050/G//A         | nonsynonymous | 0 | 1 |
| ZNF582    | chr19 | 56901453/G//A         | nonsynonymous | 0 | 1 |
| ZIM2      | chr19 | 57286515/C//T         | synonymous    | 0 | 1 |
| PEG3      | chr19 | 57335807/C//T         | nonsynonymous | 0 | 1 |
| ZNF584    | chr19 | 58928499/G//A         | nonsynonymous | 0 | 1 |
|           | chr20 | 29976852/C//T         | synonymous    | 0 | 1 |
| SULF2     | chr20 | 46292868/T//G         | synonymous    | 0 | 1 |
| PREX1     | chr20 | 47307632/C//G         | nonsynonymous | 0 | 1 |
| ARFGEF2   | chr20 | 47649641/C//T         | synonymous    | 0 | 1 |
| DPM1      | chr20 | 49575082/G//A         | synonymous    | 0 | 1 |
| ZNF831    | chr20 | 57767889/G//A         | synonymous    | 0 | 1 |
| GRIK1     | chr21 | 31015210/G//A         | nonsynonymous | 0 | 1 |
| KRTAP15-1 | chr21 | 31812704/G//A         | nonsynonymous | 0 | 1 |
| TSPEAR    | chr21 | 45947200/C//T         | nonsynonymous | 0 | 1 |
| VPREB1    | chr22 | 22599717/G//A         | nonsynonymous | 0 | 1 |
| RAB36     | chr22 | 23498182/C//T         | synonymous    | 0 | 1 |
| CRYBB3    | chr22 | 25597363/G//A         | synonymous    | 0 | 1 |
| EMID1     | chr22 | 29639464/G//A         | nonsynonymous | 0 | 1 |
| GAL3ST1   | chr22 | 30953312/G//C         | nonsynonymous | 0 | 1 |
| INPP5J    | chr22 | 31522937/C//T         | synonymous    | 0 | 1 |
| KLHDC7B   | chr22 | 50986860/G//A         | nonsynonymous | 0 | 1 |
| MAGEE2    | chrX  | 75003804/A//G         | synonymous    | 0 | 1 |
| ITPKB     | chr1  | 226827281/T//C        | nonsynonymous | 0 | 1 |
| DNAH7     | chr2  | 196849429/C//T        | nonsynonymous | 0 | 1 |
| CYP8B1    | chr3  | 42916000/C//T         | nonsynonymous | 0 | 1 |
| ZNF717    | chr3  | 75787159/C//T         | nonsynonymous | 0 | 1 |
| PHF3      | chr6  | 64412430/AGTGG AAC//A | nonsynonymous | 0 | 1 |
| ZNF92     | chr7  | 64864074/C//T         | synonymous    | 0 | 1 |
| NYAP1     | chr7  | 100084509/G//A        | nonsynonymous | 0 | 1 |
| TFR2      | chr7  | 100218639/C//G        | synonymous    | 0 | 1 |
| SLC39A12  | chr10 | 18266997/G//A         | nonsynonymous | 0 | 1 |
| GABRG3    | chr15 | 27772774/C//T         | nonsynonymous | 0 | 1 |
| SPIRE2    | chr16 | 89916910/C//T         | nonsynonymous | 0 | 1 |
| SLC43A2   | chr17 | 1486571/C//T          | nonsynonymous | 0 | 1 |
| TP53      | chr17 | 7577609/C//T          | nonsynonymous | 0 | 1 |
| MAP2K3    | chr17 | 21207835/G//A         | synonymous    | 0 | 1 |
| ABCA7     | chr19 | 1054323/C//T          | nonsynonymous | 0 | 1 |
| DEDD2     | chr19 | 42721059/C//G         | nonsynonymous | 0 | 1 |
| JAKMIP2   | chr5  | 146971254/A//T        | synonymous    | 0 | 1 |
| BMT2      | chr7  | 112461978/T//C        | nonsynonymous | 0 | 1 |
| CCDC166   | chr8  | 144789931/G//A        | nonsynonymous | 0 | 1 |
| PKN3      | chr9  | 131468131/C//T        | synonymous    | 0 | 1 |
| ZFYVE26   | chr14 | 68249846/G//GCCA      | nonsynonymous | 0 | 1 |
| MYO5A     | chr15 | 52708452/C//G         | nonsynonymous | 0 | 1 |
| ZNF709    | chr19 | 12575035/C//T         | synonymous    | 0 | 1 |
| AJAP1     | chr1  | 4834599/C//T          | synonymous    | 1 | 0 |
| ZC3H12A   | chr1  | 37948856/G//A         | nonsynonymous | 1 | 0 |
| OR6Y1     | chr1  | 158517563/G//T        | synonymous    | 1 | 0 |
| NUF2      | chr1  | 163310172/A//G        | nonsynonymous | 1 | 0 |
| TNN       | chr1  | 175046943/G//A        | nonsynonymous | 1 | 0 |
| BRINP3    | chr1  | 190067657/G//A        | nonsynonymous | 1 | 0 |

|          |       |                   |               |   |   |
|----------|-------|-------------------|---------------|---|---|
| USP34    | chr2  | 61633162/C//G     | nonsynonymous | 1 | 0 |
| TTC31    | chr2  | 74720154/C//T     | nonsynonymous | 1 | 0 |
| CLK1     | chr2  | 201726007/C//A    | nonsynonymous | 1 | 0 |
| GPR1     | chr2  | 207041079/C//A    | nonsynonymous | 1 | 0 |
| ABCA12   | chr2  | 215876306/C//A    | nonsynonymous | 1 | 0 |
| PTPRN    | chr2  | 220173972/C//T    | nonsynonymous | 1 | 0 |
| TGM4     | chr3  | 44916130/G//T     | synonymous    | 1 | 0 |
| CCR3     | chr3  | 46306706/C//T     | synonymous    | 1 | 0 |
| COL7A1   | chr3  | 48621334/G//A     | nonsynonymous | 1 | 0 |
| ROBO1    | chr3  | 78667190/G//A     | nonsynonymous | 1 | 0 |
| JAKMIP1  | chr4  | 6086661/C//T      | nonsynonymous | 1 | 0 |
| MAD2L1   | chr4  | 120986839/C//A    | nonsynonymous | 1 | 0 |
| TENM3    | chr4  | 183267959/C//A    | nonsynonymous | 1 | 0 |
| WWC2     | chr4  | 184166609/C//T    | nonsynonymous | 1 | 0 |
| ADCY2    | chr5  | 7707861/C//T      | synonymous    | 1 | 0 |
| KCNN2    | chr5  | 113740487/C//A    | nonsynonymous | 1 | 0 |
| PCDHAC2  | chr5  | 140346543/G//A    | synonymous    | 1 | 0 |
| PCDHB12  | chr5  | 140590010/G//A    | nonsynonymous | 1 | 0 |
| PCDHGA8  | chr5  | 140772387/G//A    | nonsynonymous | 1 | 0 |
| IBTK     | chr6  | 82925884/C//G     | nonsynonymous | 1 | 0 |
| CALCR    | chr7  | 93125209/C//A     | synonymous    | 1 | 0 |
| TECPR1   | chr7  | 97874258/C//T     | nonsynonymous | 1 | 0 |
| RBM28    | chr7  | 127979361/G//A    | nonsynonymous | 1 | 0 |
| ZC3HAV1  | chr7  | 138764890/G//T    | nonsynonymous | 1 | 0 |
| GIMAP6   | chr7  | 150325337/C//T    | nonsynonymous | 1 | 0 |
| TNKS     | chr8  | 9634208/C//T      | nonsynonymous | 1 | 0 |
| PAG1     | chr8  | 81897534/G//A     | nonsynonymous | 1 | 0 |
| CNBD1    | chr8  | 88296971/G//A     | nonsynonymous | 1 | 0 |
| CPQ      | chr8  | 97797533/C//T     | synonymous    | 1 | 0 |
| UNC13B   | chr9  | 35378415/GGGA//G  | nonsynonymous | 1 | 0 |
| PAX6     | chr11 | 31824257/G//T     | nonsynonymous | 1 | 0 |
| OR5D16   | chr11 | 55606627/T//A     | nonsynonymous | 1 | 0 |
| OR8U8    | chr11 | 56143450/C//A     | synonymous    | 1 | 0 |
| HTR2A    | chr13 | 47409736/C//T     | nonsynonymous | 1 | 0 |
| CMA1     | chr14 | 24974804/C//T     | nonsynonymous | 1 | 0 |
| ESRRB    | chr14 | 76928919/C//T     | synonymous    | 1 | 0 |
| PPP1R14D | chr15 | 41120881/T//C     | synonymous    | 1 | 0 |
| FEM1B    | chr15 | 68570711/G//A     | synonymous    | 1 | 0 |
| KLHL25   | chr15 | 86312269/G//A     | nonsynonymous | 1 | 0 |
| C16orf96 | chr16 | 4638190/C//A      | nonsynonymous | 1 | 0 |
| BCAS3    | chr17 | 59024616/A//G     | nonsynonymous | 1 | 0 |
| DYRK1B   | chr19 | 40317921/G//T     | synonymous    | 1 | 0 |
| SLC8A2   | chr19 | 47960223/T//C     | nonsynonymous | 1 | 0 |
| NUCB1    | chr19 | 49414466/A//C     | nonsynonymous | 1 | 0 |
| TARM1    | chr19 | 54578145/C//G     | nonsynonymous | 1 | 0 |
| RRP1     | chr21 | 45219481/G//C     | nonsynonymous | 1 | 0 |
| PLXNB2   | chr22 | 50726369/C//A     | nonsynonymous | 1 | 0 |
| CT47B1   | chrX  | 120008869/G//A    | nonsynonymous | 1 | 0 |
| RYR2     | chr1  | 237954819/C//T    | synonymous    | 0 | 1 |
| CDCA7    | chr2  | 174232418/TCTA//T | synonymous    | 0 | 1 |
| TTN      | chr2  | 179576050/G//A    | nonsynonymous | 0 | 1 |
| POU4F2   | chr4  | 147561500/A//C    | nonsynonymous | 0 | 1 |
| FAXDC2   | chr5  | 154202034/C//A    | nonsynonymous | 0 | 1 |
| ELOVL2   | chr6  | 10983985/A//G     | synonymous    | 0 | 1 |
| CDC40    | chr6  | 110501698/G//A    | synonymous    | 0 | 1 |
| UTRN     | chr6  | 144872220/T//A    | nonsynonymous | 0 | 1 |
| PMS2     | chr7  | 6026860/G//T      | synonymous    | 0 | 1 |
| DPP6     | chr7  | 154561192/G//A    | nonsynonymous | 0 | 1 |
| NAT1     | chr8  | 18080283/A//G     | nonsynonymous | 0 | 1 |
| CEBPD    | chr8  | 48650359/G//A     | synonymous    | 0 | 1 |
| ARHGAP39 | chr8  | 145771019/C//T    | nonsynonymous | 0 | 1 |
|          | chr9  | 116356436/G//A    | synonymous    | 0 | 1 |
| ENKUR    | chr10 | 25304929/C//T     | synonymous    | 0 | 1 |
| SVIL     | chr10 | 29821810/C//T     | nonsynonymous | 0 | 1 |
| LSP1     | chr11 | 1901336/G//A      | nonsynonymous | 0 | 1 |
| OR52W1   | chr11 | 6221235/T//A      | nonsynonymous | 0 | 1 |
| MMP13    | chr11 | 102822868/G//A    | synonymous    | 0 | 1 |
| SLC2A3   | chr12 | 8083105/T//A      | nonsynonymous | 0 | 1 |
| C1QL4    | chr12 | 49726804/A//G     | synonymous    | 0 | 1 |
| CAND1    | chr12 | 67675775/A//T     | nonsynonymous | 0 | 1 |

|          |       |                |               |   |   |
|----------|-------|----------------|---------------|---|---|
| TBX3     | chr12 | 115114119/T//C | synonymous    | 0 | 1 |
| ARRB2    | chr17 | 4621220/G//A   | nonsynonymous | 0 | 1 |
| ZNF208   | chr19 | 22154249/A//G  | nonsynonymous | 0 | 1 |
| CD93     | chr20 | 23066178/C//A  | nonsynonymous | 0 | 1 |
|          | chr20 | 39802757/G//A  | synonymous    | 0 | 1 |
| DIP2A    | chr21 | 47957169/A//G  | nonsynonymous | 0 | 1 |
| PPM1F    | chr22 | 22287803/C//T  | nonsynonymous | 0 | 1 |
| MN1      | chr22 | 28195002/C//T  | synonymous    | 0 | 1 |
| SEC14L4  | chr22 | 30891602/G//T  | nonsynonymous | 0 | 1 |
| ZNF182   | chrX  | 47835963/T//G  | nonsynonymous | 0 | 1 |
| FAM132A  | chr1  | 1179386/C//A   | nonsynonymous | 1 | 0 |
| SCNN1D   | chr1  | 1225868/T//C   | nonsynonymous | 1 | 0 |
| ARHGEF16 | chr1  | 3383907/G//A   | synonymous    | 1 | 0 |
| KCNAB2   | chr1  | 6156688/G//T   | synonymous    | 1 | 0 |
| KLHL21   | chr1  | 6659234/C//G   | nonsynonymous | 1 | 0 |
| SLC2A5   | chr1  | 9098566/C//A   | nonsynonymous | 1 | 0 |
| EXOSC10  | chr1  | 11137685/C//T  | synonymous    | 1 | 0 |
| MTOR     | chr1  | 11194529/A//G  | synonymous    | 1 | 0 |
| DISP3    | chr1  | 11561097/G//A  | synonymous    | 1 | 0 |
| KIAA2013 | chr1  | 11985748/G//A  | nonsynonymous | 1 | 0 |
|          | chr1  | 19952003/G//A  | synonymous    | 1 | 0 |
| RAP1GAP  | chr1  | 21940493/C//T  | synonymous    | 1 | 0 |
| ZBTB40   | chr1  | 22817041/A//G  | synonymous    | 1 | 0 |
| EPHB2    | chr1  | 23191387/C//T  | nonsynonymous | 1 | 0 |
| AHDC1    | chr1  | 27876919/C//T  | nonsynonymous | 1 | 0 |
| OPRD1    | chr1  | 29189458/G//T  | nonsynonymous | 1 | 0 |
| MATN1    | chr1  | 31189101/G//T  | nonsynonymous | 1 | 0 |
| ZMYM1    | chr1  | 35579238/C//T  | nonsynonymous | 1 | 0 |
| CDCA8    | chr1  | 38158272/C//T  | synonymous    | 1 | 0 |
| EPHA10   | chr1  | 38192873/C//A  | nonsynonymous | 1 | 0 |
| MACF1    | chr1  | 39893807/C//T  | synonymous    | 1 | 0 |
| HIVEP3   | chr1  | 41976647/C//G  | synonymous    | 1 | 0 |
| KDM4A    | chr1  | 44156519/G//T  | nonsynonymous | 1 | 0 |
| CCDC24   | chr1  | 44458319/G//A  | synonymous    | 1 | 0 |
| C1orf228 | chr1  | 45190814/G//T  | nonsynonymous | 1 | 0 |
| MAST2    | chr1  | 46497987/C//T  | nonsynonymous | 1 | 0 |
| SSBP3    | chr1  | 54871722/C//T  | synonymous    | 1 | 0 |
| PARS2    | chr1  | 55224490/C//T  | synonymous    | 1 | 0 |
| C8A      | chr1  | 57373626/C//T  | synonymous    | 1 | 0 |
| KANK4    | chr1  | 62728944/C//A  | nonsynonymous | 1 | 0 |
| RPE65    | chr1  | 68904875/C//T  | nonsynonymous | 1 | 0 |
| ERICH3   | chr1  | 75036945/C//G  | nonsynonymous | 1 | 0 |
| SLC44A5  | chr1  | 75684230/T//G  | nonsynonymous | 1 | 0 |
| SYDE2    | chr1  | 85666410/G//C  | synonymous    | 1 | 0 |
| DDAH1    | chr1  | 85790518/C//G  | nonsynonymous | 1 | 0 |
| COL24A1  | chr1  | 86591119/G//T  | synonymous    | 1 | 0 |
| ZNF644   | chr1  | 91404519/C//T  | nonsynonymous | 1 | 0 |
| CD101    | chr1  | 117554544/C//T | nonsynonymous | 1 | 0 |
| GJA8     | chr1  | 147380416/G//A | nonsynonymous | 1 | 0 |
| FLG      | chr1  | 152276848/T//C | nonsynonymous | 1 | 0 |
| ATP8B2   | chr1  | 154321492/C//T | synonymous    | 1 | 0 |
| ZBTB7B   | chr1  | 154987160/G//C | synonymous    | 1 | 0 |
| ZBTB7B   | chr1  | 154987446/G//C | nonsynonymous | 1 | 0 |
| BCAN     | chr1  | 156616884/G//T | nonsynonymous | 1 | 0 |
| FCRL5    | chr1  | 157494075/C//T | nonsynonymous | 1 | 0 |
| OR6Y1    | chr1  | 158517412/T//A | nonsynonymous | 1 | 0 |
| SPTA1    | chr1  | 158590229/G//T | nonsynonymous | 1 | 0 |
| OR6K2    | chr1  | 158670205/T//G | nonsynonymous | 1 | 0 |
| OR6K3    | chr1  | 158687452/C//A | nonsynonymous | 1 | 0 |
| SLAMF6   | chr1  | 160466034/G//C | nonsynonymous | 1 | 0 |
| HSPA6    | chr1  | 161494885/T//C | nonsynonymous | 1 | 0 |
| ADCY10   | chr1  | 167793989/G//A | synonymous    | 1 | 0 |
| TBX19    | chr1  | 168278108/G//A | nonsynonymous | 1 | 0 |
| SELP     | chr1  | 169578873/G//T | nonsynonymous | 1 | 0 |
| FMO3     | chr1  | 171085371/G//T | nonsynonymous | 1 | 0 |
| FMO3     | chr1  | 171086425/G//A | nonsynonymous | 1 | 0 |
| FMO3     | chr1  | 171086501/G//A | synonymous    | 1 | 0 |
| PAPPA2   | chr1  | 176564136/G//A | nonsynonymous | 1 | 0 |
| CACNA1E  | chr1  | 181680125/G//A | nonsynonymous | 1 | 0 |
| RHOU     | chr1  | 228879380/C//G | nonsynonymous | 1 | 0 |

|          |      |                |               |   |   |
|----------|------|----------------|---------------|---|---|
| OR2W5    | chr1 | 247655163/C//A | nonsynonymous | 1 | 0 |
| OR2W3    | chr1 | 248058946/C//A | synonymous    | 1 | 0 |
| C2orf16  | chr2 | 27800241/G//A  | nonsynonymous | 1 | 0 |
| C2orf16  | chr2 | 27800409/G//A  | nonsynonymous | 1 | 0 |
| C2orf16  | chr2 | 27800754/G//C  | nonsynonymous | 1 | 0 |
| C2orf16  | chr2 | 27800813/G//T  | nonsynonymous | 1 | 0 |
|          | chr2 | 27851333/G//C  | synonymous    | 1 | 0 |
| TTC27    | chr2 | 32891832/C//G  | synonymous    | 1 | 0 |
| LTBP1    | chr2 | 33586558/G//A  | nonsynonymous | 1 | 0 |
| FSHR     | chr2 | 49190942/C//A  | nonsynonymous | 1 | 0 |
| EHBP1    | chr2 | 63091982/G//C  | nonsynonymous | 1 | 0 |
| AAK1     | chr2 | 69748088/G//T  | nonsynonymous | 1 | 0 |
| DYSF     | chr2 | 71791180/C//T  | synonymous    | 1 | 0 |
| SFXN5    | chr2 | 73172030/C//T  | synonymous    | 1 | 0 |
| ATOX8    | chr2 | 85981929/C//T  | nonsynonymous | 1 | 0 |
| TEX37    | chr2 | 88828811/G//T  | nonsynonymous | 1 | 0 |
| INPP4A   | chr2 | 99172190/G//A  | nonsynonymous | 1 | 0 |
| EIF5B    | chr2 | 99980269/G//C  | nonsynonymous | 1 | 0 |
| TMEM182  | chr2 | 103414356/G//A | synonymous    | 1 | 0 |
| MERTK    | chr2 | 112725811/C//G | nonsynonymous | 1 | 0 |
| PSD4     | chr2 | 113940771/C//T | synonymous    | 1 | 0 |
| TNFAIP6  | chr2 | 152222682/C//T | synonymous    | 1 | 0 |
| NEB      | chr2 | 152500642/T//C | nonsynonymous | 1 | 0 |
| BBS5     | chr2 | 170350334/A//G | synonymous    | 1 | 0 |
| TTN      | chr2 | 179500287/C//T | nonsynonymous | 1 | 0 |
| COL3A1   | chr2 | 189875015/G//A | nonsynonymous | 1 | 0 |
| HECW2    | chr2 | 197297950/G//A | synonymous    | 1 | 0 |
| PGAP1    | chr2 | 197738442/T//C | synonymous    | 1 | 0 |
| AOX1     | chr2 | 201527577/G//C | nonsynonymous | 1 | 0 |
| ZDBF2    | chr2 | 207169719/G//T | nonsynonymous | 1 | 0 |
| UNC80    | chr2 | 210640747/G//A | synonymous    | 1 | 0 |
| ACSL3    | chr2 | 223783839/C//T | nonsynonymous | 1 | 0 |
| SLC19A3  | chr2 | 228552941/T//G | nonsynonymous | 1 | 0 |
| PRSS56   | chr2 | 233386552/C//T | nonsynonymous | 1 | 0 |
| UGT1A3   | chr2 | 234638543/C//T | synonymous    | 1 | 0 |
| HDAC4    | chr2 | 240005892/G//A | nonsynonymous | 1 | 0 |
| CNTN6    | chr3 | 1427489/T//C   | synonymous    | 1 | 0 |
| CNOT10   | chr3 | 32726880/G//C  | synonymous    | 1 | 0 |
| UBP1     | chr3 | 33444402/G//C  | synonymous    | 1 | 0 |
| KIF15    | chr3 | 44852426/A//G  | nonsynonymous | 1 | 0 |
| CACNA2D2 | chr3 | 50405594/C//G  | nonsynonymous | 1 | 0 |
| DNAH12   | chr3 | 57431952/C//T  | nonsynonymous | 1 | 0 |
| OR5AC2   | chr3 | 97806690/T//G  | nonsynonymous | 1 | 0 |
| ABI3BP   | chr3 | 100585772/G//A | synonymous    | 1 | 0 |
| DZIP3    | chr3 | 108409708/C//T | synonymous    | 1 | 0 |
| MORC1    | chr3 | 108778716/T//A | nonsynonymous | 1 | 0 |
| USF3     | chr3 | 113379494/C//T | synonymous    | 1 | 0 |
| DIRC2    | chr3 | 122545776/C//G | synonymous    | 1 | 0 |
| MBD4     | chr3 | 129151452/G//A | synonymous    | 1 | 0 |
| COL6A5   | chr3 | 130110423/G//C | nonsynonymous | 1 | 0 |
| PLSCR2   | chr3 | 146173191/C//G | nonsynonymous | 1 | 0 |
| ZIC1     | chr3 | 147130417/G//A | synonymous    | 1 | 0 |
| PTX3     | chr3 | 157160444/G//T | nonsynonymous | 1 | 0 |
| IFT80    | chr3 | 160025526/C//T | nonsynonymous | 1 | 0 |
| VWA5B2   | chr3 | 183959568/G//A | synonymous    | 1 | 0 |
| CLCN2    | chr3 | 184070114/G//A | synonymous    | 1 | 0 |
| TNK2     | chr3 | 195611833/C//T | synonymous    | 1 | 0 |
|          | chr3 | 196669250/G//C | synonymous    | 1 | 0 |
| ZFYVE28  | chr4 | 2272555/G//A   | nonsynonymous | 1 | 0 |
| MAN2B2   | chr4 | 6590784/G//A   | nonsynonymous | 1 | 0 |
| TBCK     | chr4 | 107183324/C//T | synonymous    | 1 | 0 |
| ANK2     | chr4 | 114186118/G//A | synonymous    | 1 | 0 |
| KIAA1109 | chr4 | 123195581/C//T | nonsynonymous | 1 | 0 |
| PCDH10   | chr4 | 134072901/C//A | nonsynonymous | 1 | 0 |
| FREM3    | chr4 | 144617001/G//T | nonsynonymous | 1 | 0 |
| TLR2     | chr4 | 154625872/A//G | nonsynonymous | 1 | 0 |
| TKTL2    | chr4 | 164394508/C//A | nonsynonymous | 1 | 0 |
| TMA16    | chr4 | 164436581/G//T | nonsynonymous | 1 | 0 |
| HMGB2    | chr4 | 174253275/C//G | nonsynonymous | 1 | 0 |
| ICE1     | chr5 | 5462233/C//T   | nonsynonymous | 1 | 0 |

|          |      |                |               |   |   |
|----------|------|----------------|---------------|---|---|
| MED10    | chr5 | 6378600/C//T   | synonymous    | 1 | 0 |
| TRIO     | chr5 | 14498701/G//C  | nonsynonymous | 1 | 0 |
| MROH2B   | chr5 | 41000359/C//A  | nonsynonymous | 1 | 0 |
| FBXO4    | chr5 | 41930004/C//G  | nonsynonymous | 1 | 0 |
| GRAMD3   | chr5 | 125819198/A//C | nonsynonymous | 1 | 0 |
| LRRTM2   | chr5 | 138210132/A//T | nonsynonymous | 1 | 0 |
| ANKHD1   | chr5 | 139838217/A//G | nonsynonymous | 1 | 0 |
| GABRA1   | chr5 | 161324263/C//A | synonymous    | 1 | 0 |
| KIAA0319 | chr6 | 24559354/C//A  | nonsynonymous | 1 | 0 |
|          | chr6 | 28198257/GT//G | synonymous    | 1 | 0 |
| OR12D2   | chr6 | 29365385/G//T  | synonymous    | 1 | 0 |
| HCG4     | chr6 | 29759784/T//C  | synonymous    | 1 | 0 |
| PPP1R10  | chr6 | 30577613/A//T  | nonsynonymous | 1 | 0 |
| LY6G5B   | chr6 | 31640068/G//A  | synonymous    | 1 | 0 |
| C6orf10  | chr6 | 32335738/G//C  | synonymous    | 1 | 0 |
| TAP2     | chr6 | 32805897/T//C  | synonymous    | 1 | 0 |
| UHRF1BP1 | chr6 | 34804053/G//T  | nonsynonymous | 1 | 0 |
| CCDC167  | chr6 | 37467685/G//A  | synonymous    | 1 | 0 |
| KCNK16   | chr6 | 39290140/G//T  | synonymous    | 1 | 0 |
| TDRD6    | chr6 | 46661036/A//T  | nonsynonymous | 1 | 0 |
| GFRAL    | chr6 | 55223906/C//A  | nonsynonymous | 1 | 0 |
| DST      | chr6 | 56463388/T//C  | synonymous    | 1 | 0 |
| EYS      | chr6 | 65301559/C//G  | nonsynonymous | 1 | 0 |
| ADGRB3   | chr6 | 69640507/G//T  | nonsynonymous | 1 | 0 |
| COL12A1  | chr6 | 75806970/G//A  | nonsynonymous | 1 | 0 |
| IBTK     | chr6 | 82906088/T//G  | nonsynonymous | 1 | 0 |
| ZNF292   | chr6 | 87969468/G//T  | nonsynonymous | 1 | 0 |
| GABRR1   | chr6 | 89899919/A//T  | nonsynonymous | 1 | 0 |
| RRAGD    | chr6 | 90082230/A//G  | nonsynonymous | 1 | 0 |
| AK9      | chr6 | 109980517/C//T | nonsynonymous | 1 | 0 |
| HS3ST5   | chr6 | 114378975/C//T | nonsynonymous | 1 | 0 |
| PKIB     | chr6 | 123038945/G//A | synonymous    | 1 | 0 |
| SOGA3    | chr6 | 127837673/C//T | synonymous    | 1 | 0 |
| MOXD1    | chr6 | 132722341/G//A | synonymous    | 1 | 0 |
| REPS1    | chr6 | 139247574/C//T | synonymous    | 1 | 0 |
| HECA     | chr6 | 139487803/G//T | synonymous    | 1 | 0 |
| ADGB     | chr6 | 146993453/T//G | nonsynonymous | 1 | 0 |
| TULP4    | chr6 | 158922987/C//G | synonymous    | 1 | 0 |
| FNDC1    | chr6 | 159688918/A//G | synonymous    | 1 | 0 |
| ELFN1    | chr7 | 1785053/G//A   | nonsynonymous | 1 | 0 |
| RADIL    | chr7 | 4839315/C//G   | nonsynonymous | 1 | 0 |
| WIPI2    | chr7 | 5232787/G//T   | nonsynonymous | 1 | 0 |
| WIPI2    | chr7 | 5270512/C//T   | synonymous    | 1 | 0 |
| ACTB     | chr7 | 5569032/C//T   | nonsynonymous | 1 | 0 |
| GRID2IP  | chr7 | 6590823/A//T   | nonsynonymous | 1 | 0 |
| THSD7A   | chr7 | 11676395/A//T  | synonymous    | 1 | 0 |
| VWDE     | chr7 | 12379958/G//T  | nonsynonymous | 1 | 0 |
| SCIN     | chr7 | 12664670/G//A  | synonymous    | 1 | 0 |
| TRA2A    | chr7 | 23545814/T//C  | nonsynonymous | 1 | 0 |
| TBX20    | chr7 | 35288387/C//G  | synonymous    | 1 | 0 |
| HECW1    | chr7 | 43485109/G//T  | nonsynonymous | 1 | 0 |
| EGFR     | chr7 | 55273185/C//G  | nonsynonymous | 1 | 0 |
| SUMF2    | chr7 | 56147230/C//T  | nonsynonymous | 1 | 0 |
| PTPN12   | chr7 | 77256211/C//G  | synonymous    | 1 | 0 |
| PCLO     | chr7 | 82579872/C//T  | synonymous    | 1 | 0 |
| PCLO     | chr7 | 82584547/G//A  | nonsynonymous | 1 | 0 |
| SEMA3E   | chr7 | 83021900/C//A  | synonymous    | 1 | 0 |
| SEMA3D   | chr7 | 84727263/C//G  | nonsynonymous | 1 | 0 |
| DLX6     | chr7 | 96637029/C//A  | synonymous    | 1 | 0 |
| DLX5     | chr7 | 96653821/C//T  | nonsynonymous | 1 | 0 |
| BAIAP2L1 | chr7 | 97935801/C//T  | synonymous    | 1 | 0 |
| ZNF394   | chr7 | 99091493/C//A  | nonsynonymous | 1 | 0 |
| ZNF394   | chr7 | 99091913/C//T  | nonsynonymous | 1 | 0 |
| ZNF394   | chr7 | 99092228/C//G  | nonsynonymous | 1 | 0 |
| ZNF394   | chr7 | 99092237/C//T  | nonsynonymous | 1 | 0 |
| STAG3    | chr7 | 99811671/C//T  | synonymous    | 1 | 0 |
| FBXO24   | chr7 | 100189337/C//T | nonsynonymous | 1 | 0 |
| NAMPT    | chr7 | 105891624/C//G | nonsynonymous | 1 | 0 |
| FAM71F2  | chr7 | 128317840/G//A | synonymous    | 1 | 0 |
| CPA4     | chr7 | 129946665/C//T | synonymous    | 1 | 0 |

|          |       |                |               |   |   |
|----------|-------|----------------|---------------|---|---|
| LRGUK    | chr7  | 133827880/A//G | nonsynonymous | 1 | 0 |
| WDR60    | chr7  | 158662594/C//T | nonsynonymous | 1 | 0 |
| CSMD1    | chr8  | 3072125/G//T   | synonymous    | 1 | 0 |
| ZNF705G  | chr8  | 7215671/G//A   | nonsynonymous | 1 | 0 |
| VPS37A   | chr8  | 17137765/G//T  | nonsynonymous | 1 | 0 |
| NAT2     | chr8  | 18257584/T//C  | nonsynonymous | 1 | 0 |
| POLR3D   | chr8  | 22107969/G//T  | nonsynonymous | 1 | 0 |
| RHOBTB2  | chr8  | 22863521/C//G  | synonymous    | 1 | 0 |
| TRIM35   | chr8  | 27146728/G//C  | synonymous    | 1 | 0 |
| PTK2B    | chr8  | 27255180/G//T  | nonsynonymous | 1 | 0 |
| ZNF703   | chr8  | 37555125/G//T  | nonsynonymous | 1 | 0 |
| GOLGA7   | chr8  | 41348336/T//A  | synonymous    | 1 | 0 |
| SLC20A2  | chr8  | 42294700/C//T  | nonsynonymous | 1 | 0 |
| CLVS1    | chr8  | 62370901/C//A  | nonsynonymous | 1 | 0 |
| C8orf44  | chr8  | 67592100/C//A  | nonsynonymous | 1 | 0 |
| PRDM14   | chr8  | 70982062/G//A  | nonsynonymous | 1 | 0 |
|          | chr8  | 85097210/C//G  | synonymous    | 1 | 0 |
| RALYL    | chr8  | 85785527/G//A  | nonsynonymous | 1 | 0 |
| CDH17    | chr8  | 95164199/G//A  | nonsynonymous | 1 | 0 |
| RAD54B   | chr8  | 95423415/C//A  | nonsynonymous | 1 | 0 |
| PKHD1L1  | chr8  | 110464394/A//T | nonsynonymous | 1 | 0 |
| CSMD3    | chr8  | 113249445/T//C | nonsynonymous | 1 | 0 |
| AARD     | chr8  | 117954894/C//T | nonsynonymous | 1 | 0 |
| FAM83A   | chr8  | 124206337/G//A | nonsynonymous | 1 | 0 |
| FBXO32   | chr8  | 124546968/A//C | nonsynonymous | 1 | 0 |
| SQLE     | chr8  | 126021442/C//T | nonsynonymous | 1 | 0 |
| FAM135B  | chr8  | 139163519/T//C | nonsynonymous | 1 | 0 |
| TOP1MT   | chr8  | 144391641/G//A | synonymous    | 1 | 0 |
| MROH6    | chr8  | 144651884/C//A | nonsynonymous | 1 | 0 |
| PLEC     | chr8  | 144994074/G//A | synonymous    | 1 | 0 |
| PLEC     | chr8  | 144995739/G//A | synonymous    | 1 | 0 |
| PLEC     | chr8  | 144995893/G//A | nonsynonymous | 1 | 0 |
| FOXD4    | chr9  | 116940/C//T    | nonsynonymous | 1 | 0 |
| GLDC     | chr9  | 6553428/G//A   | synonymous    | 1 | 0 |
| PTPRD    | chr9  | 8340361/C//A   | nonsynonymous | 1 | 0 |
| HAUS6    | chr9  | 19102636/G//A  | nonsynonymous | 1 | 0 |
| FOCAD    | chr9  | 20789352/C//G  | synonymous    | 1 | 0 |
|          | chr9  | 21974583/G//A  | synonymous    | 1 | 0 |
| DNAI1    | chr9  | 34512430/C//A  | synonymous    | 1 | 0 |
| SPAG8    | chr9  | 35810968/C//G  | synonymous    | 1 | 0 |
| TRPM3    | chr9  | 73478031/A//G  | synonymous    | 1 | 0 |
| PRUNE2   | chr9  | 79325251/G//A  | nonsynonymous | 1 | 0 |
| FRMD3    | chr9  | 85913706/C//T  | nonsynonymous | 1 | 0 |
| CDK20    | chr9  | 90585703/T//A  | nonsynonymous | 1 | 0 |
| AUH      | chr9  | 93979572/T//C  | nonsynonymous | 1 | 0 |
| FRRS1L   | chr9  | 111903663/C//G | nonsynonymous | 1 | 0 |
| PKN3     | chr9  | 131468097/A//T | nonsynonymous | 1 | 0 |
| PRRC2B   | chr9  | 134308065/G//A | synonymous    | 1 | 0 |
| PRRC2B   | chr9  | 134363470/C//T | nonsynonymous | 1 | 0 |
| DDX31    | chr9  | 135545417/C//G | nonsynonymous | 1 | 0 |
| SLC2A6   | chr9  | 136339215/C//T | synonymous    | 1 | 0 |
| SLC2A6   | chr9  | 136342335/C//T | nonsynonymous | 1 | 0 |
| CAMSAP1  | chr9  | 138703218/G//C | nonsynonymous | 1 | 0 |
| SEC16A   | chr9  | 139350150/G//C | synonymous    | 1 | 0 |
| ZMYND19  | chr9  | 140477587/G//A | nonsynonymous | 1 | 0 |
| CACNA1B  | chr9  | 140880876/C//A | nonsynonymous | 1 | 0 |
| FAM170B  | chr10 | 50339892/G//T  | nonsynonymous | 1 | 0 |
| C10orf71 | chr10 | 50530816/C//A  | nonsynonymous | 1 | 0 |
| C10orf71 | chr10 | 50530830/C//A  | synonymous    | 1 | 0 |
| PCDH15   | chr10 | 55582167/A//G  | synonymous    | 1 | 0 |
| PCDH15   | chr10 | 55826601/G//T  | nonsynonymous | 1 | 0 |
| TBATA    | chr10 | 72538356/C//A  | nonsynonymous | 1 | 0 |
| CDH23    | chr10 | 73539144/G//C  | nonsynonymous | 1 | 0 |
| NDST2    | chr10 | 75567268/G//A  | synonymous    | 1 | 0 |
| CCSER2   | chr10 | 86131500/C//A  | nonsynonymous | 1 | 0 |
| PTEN     | chr10 | 89717615/C//T  | nonsynonymous | 1 | 0 |
| HTR7     | chr10 | 92502206/T//G  | synonymous    | 1 | 0 |
| TNKS2    | chr10 | 93601930/A//T  | nonsynonymous | 1 | 0 |
| LG11     | chr10 | 95553074/G//C  | nonsynonymous | 1 | 0 |
| MMS19    | chr10 | 99228139/G//A  | nonsynonymous | 1 | 0 |

|          |       |                |               |   |   |
|----------|-------|----------------|---------------|---|---|
| PNLIPRP3 | chr10 | 118231366/A//G | nonsynonymous | 1 | 0 |
| GPR26    | chr10 | 125434427/C//G | nonsynonymous | 1 | 0 |
| ANO9     | chr11 | 431698/T//C    | nonsynonymous | 1 | 0 |
| TRPM5    | chr11 | 2434743/A//C   | nonsynonymous | 1 | 0 |
| NAP1L4   | chr11 | 2992765/C//G   | nonsynonymous | 1 | 0 |
| OR51G2   | chr11 | 4936516/G//A   | synonymous    | 1 | 0 |
| OR52J3   | chr11 | 5068334/C//T   | synonymous    | 1 | 0 |
| OR52D1   | chr11 | 5510505/T//A   | nonsynonymous | 1 | 0 |
| MRGPRX4  | chr11 | 18194787/G//A  | synonymous    | 1 | 0 |
| HIPK3    | chr11 | 33308138/A//G  | nonsynonymous | 1 | 0 |
| TRIM44   | chr11 | 35747683/C//G  | nonsynonymous | 1 | 0 |
| MADD     | chr11 | 47311504/G//T  | nonsynonymous | 1 | 0 |
| OR5D18   | chr11 | 55587794/G//T  | nonsynonymous | 1 | 0 |
| OR5F1    | chr11 | 55761660/C//A  | nonsynonymous | 1 | 0 |
| OR8H2    | chr11 | 55873438/G//A  | nonsynonymous | 1 | 0 |
| OR9G4    | chr11 | 56510496/C//G  | nonsynonymous | 1 | 0 |
|          | chr11 | 61313652/C//G  | synonymous    | 1 | 0 |
| ROM1     | chr11 | 62382135/G//A  | nonsynonymous | 1 | 0 |
| GANAB    | chr11 | 62397707/C//A  | nonsynonymous | 1 | 0 |
| SLC22A6  | chr11 | 62747212/G//T  | nonsynonymous | 1 | 0 |
| SLC22A9  | chr11 | 63141134/G//T  | synonymous    | 1 | 0 |
| NRXN2    | chr11 | 64374593/G//T  | synonymous    | 1 | 0 |
| MEN1     | chr11 | 64575503/C//T  | nonsynonymous | 1 | 0 |
| CDC42BPG | chr11 | 64594187/G//C  | nonsynonymous | 1 | 0 |
| LTBP3    | chr11 | 65321727/G//A  | synonymous    | 1 | 0 |
|          | chr11 | 65479815/C//T  | synonymous    | 1 | 0 |
| DRAP1    | chr11 | 65686987/G//C  | nonsynonymous | 1 | 0 |
| DRAP1    | chr11 | 65687256/G//A  | synonymous    | 1 | 0 |
| GPR152   | chr11 | 67219059/C//A  | synonymous    | 1 | 0 |
| MYO7A    | chr11 | 76868003/G//T  | nonsynonymous | 1 | 0 |
| FAT3     | chr11 | 92258000/G//T  | nonsynonymous | 1 | 0 |
| GUCY1A2  | chr11 | 106888851/G//T | synonymous    | 1 | 0 |
| ATM      | chr11 | 108098602/G//A | nonsynonymous | 1 | 0 |
| CADM1    | chr11 | 115047300/G//T | nonsynonymous | 1 | 0 |
| BCL9L    | chr11 | 118772862/C//T | synonymous    | 1 | 0 |
| BCL9L    | chr11 | 118772879/C//T | nonsynonymous | 1 | 0 |
| OR10G4   | chr11 | 123886959/G//T | synonymous    | 1 | 0 |
| OR8D2    | chr11 | 124189167/C//A | nonsynonymous | 1 | 0 |
|          | chr11 | 126276146/G//T | synonymous    | 1 | 0 |
| KIRREL3  | chr11 | 126432769/C//A | nonsynonymous | 1 | 0 |
| CACNA1C  | chr12 | 2764391/C//A   | nonsynonymous | 1 | 0 |
| VWF      | chr12 | 6153620/C//T   | synonymous    | 1 | 0 |
| VAMP1    | chr12 | 6575058/C//G   | nonsynonymous | 1 | 0 |
| MLF2     | chr12 | 6858111/C//T   | synonymous    | 1 | 0 |
|          | chr12 | 6925068/G//A   | synonymous    | 1 | 0 |
| A2M      | chr12 | 9260184/T//C   | nonsynonymous | 1 | 0 |
| ITPR2    | chr12 | 26628328/A//G  | synonymous    | 1 | 0 |
| ADAMTS20 | chr12 | 43944991/G//A  | synonymous    | 1 | 0 |
| OR10AD1  | chr12 | 48596553/T//C  | nonsynonymous | 1 | 0 |
| SCN8A    | chr12 | 52139810/C//G  | nonsynonymous | 1 | 0 |
| ACVR1B   | chr12 | 52385756/C//T  | synonymous    | 1 | 0 |
| TNS2     | chr12 | 53454263/C//G  | nonsynonymous | 1 | 0 |
| TIMELESS | chr12 | 56818592/G//C  | nonsynonymous | 1 | 0 |
| USP15    | chr12 | 62715244/G//C  | nonsynonymous | 1 | 0 |
| CAPS2    | chr12 | 75685575/C//A  | nonsynonymous | 1 | 0 |
| HSP90B1  | chr12 | 104341494/C//T | synonymous    | 1 | 0 |
| ALDH1L2  | chr12 | 105418260/A//G | synonymous    | 1 | 0 |
| SPPL3    | chr12 | 121204063/C//A | synonymous    | 1 | 0 |
| SETD1B   | chr12 | 122248307/G//A | nonsynonymous | 1 | 0 |
| ULK1     | chr12 | 132397757/G//A | nonsynonymous | 1 | 0 |
| CENPJ    | chr13 | 25473709/C//T  | nonsynonymous | 1 | 0 |
| PCDH9    | chr13 | 67802323/C//T  | nonsynonymous | 1 | 0 |
| MZT1     | chr13 | 73301712/G//A  | nonsynonymous | 1 | 0 |
| SOX21    | chr13 | 95363411/C//A  | synonymous    | 1 | 0 |
| CCDC168  | chr13 | 103387959/T//C | nonsynonymous | 1 | 0 |
| CCDC168  | chr13 | 103389437/C//A | nonsynonymous | 1 | 0 |
| TUBGCP3  | chr13 | 113208413/C//A | synonymous    | 1 | 0 |
| EDDM3A   | chr14 | 21216139/G//C  | nonsynonymous | 1 | 0 |
| SLC39A2  | chr14 | 21469324/C//T  | synonymous    | 1 | 0 |
| OR4E2    | chr14 | 22133659/T//C  | nonsynonymous | 1 | 0 |

|           |       |                |               |   |   |
|-----------|-------|----------------|---------------|---|---|
| CEBPE     | chr14 | 23588197/T//A  | nonsynonymous | 1 | 0 |
| MYH6      | chr14 | 23866429/G//C  | nonsynonymous | 1 | 0 |
| EGLN3     | chr14 | 34419631/C//T  | nonsynonymous | 1 | 0 |
| NEMF      | chr14 | 50300193/G//T  | nonsynonymous | 1 | 0 |
| SYNE2     | chr14 | 64518507/G//C  | nonsynonymous | 1 | 0 |
| ZBTB25    | chr14 | 64954476/C//G  | nonsynonymous | 1 | 0 |
| PLEKHH1   | chr14 | 68044918/T//A  | nonsynonymous | 1 | 0 |
| GALNT16   | chr14 | 69795176/G//C  | nonsynonymous | 1 | 0 |
| LTBP2     | chr14 | 74970642/G//T  | nonsynonymous | 1 | 0 |
| AREL1     | chr14 | 75136712/C//A  | nonsynonymous | 1 | 0 |
| YLPM1     | chr14 | 75276398/G//T  | nonsynonymous | 1 | 0 |
| TMEM63C   | chr14 | 77715633/G//T  | nonsynonymous | 1 | 0 |
| CEP128    | chr14 | 81371163/C//T  | nonsynonymous | 1 | 0 |
| TTC7B     | chr14 | 91007590/C//G  | synonymous    | 1 | 0 |
| UNC79     | chr14 | 94088662/G//T  | nonsynonymous | 1 | 0 |
| BDKRB1    | chr14 | 96730361/C//T  | synonymous    | 1 | 0 |
| XRCC3     | chr14 | 104173386/G//A | synonymous    | 1 | 0 |
| AKT1      | chr14 | 105242094/G//C | synonymous    | 1 | 0 |
| CDCA4     | chr14 | 105477522/G//C | synonymous    | 1 | 0 |
| TMEM121   | chr14 | 105995871/G//C | nonsynonymous | 1 | 0 |
| GABRG3    | chr15 | 27778007/G//A  | nonsynonymous | 1 | 0 |
| SRP14     | chr15 | 40328521/A//G  | synonymous    | 1 | 0 |
| GANC      | chr15 | 42566705/T//C  | nonsynonymous | 1 | 0 |
| STARD9    | chr15 | 42984093/G//C  | nonsynonymous | 1 | 0 |
| WDR72     | chr15 | 54005060/G//A  | nonsynonymous | 1 | 0 |
| UNC13C    | chr15 | 54556551/C//A  | nonsynonymous | 1 | 0 |
| UNC13C    | chr15 | 54919042/A//T  | nonsynonymous | 1 | 0 |
| SAXO2     | chr15 | 82564106/T//A  | synonymous    | 1 | 0 |
| RHCG      | chr15 | 90021178/C//A  | nonsynonymous | 1 | 0 |
| TICRR     | chr15 | 90119385/G//A  | nonsynonymous | 1 | 0 |
| CRTC3-AS1 | chr15 | 91184298/G//T  | synonymous    | 1 | 0 |
| ADCY9     | chr16 | 4016403/C//T   | nonsynonymous | 1 | 0 |
| TEKT5     | chr16 | 10729649/C//G  | nonsynonymous | 1 | 0 |
| TEKT5     | chr16 | 10729730/C//G  | nonsynonymous | 1 | 0 |
| GP2       | chr16 | 20335462/C//A  | nonsynonymous | 1 | 0 |
| ERN2      | chr16 | 23724565/C//G  | synonymous    | 1 | 0 |
| GTF3C1    | chr16 | 27503952/G//A  | nonsynonymous | 1 | 0 |
| PHKG2     | chr16 | 30767938/G//C  | nonsynonymous | 1 | 0 |
| ZNF646    | chr16 | 31091190/T//C  | nonsynonymous | 1 | 0 |
|           | chr16 | 31476490/C//T  | synonymous    | 1 | 0 |
| MYLK3     | chr16 | 46766141/C//A  | nonsynonymous | 1 | 0 |
| CHD9      | chr16 | 53281210/G//A  | nonsynonymous | 1 | 0 |
| RBL2      | chr16 | 53496570/G//C  | synonymous    | 1 | 0 |
| NLRC5     | chr16 | 57111659/G//T  | nonsynonymous | 1 | 0 |
| CNOT1     | chr16 | 58585122/C//T  | nonsynonymous | 1 | 0 |
| CTCF      | chr16 | 67644949/C//G  | nonsynonymous | 1 | 0 |
| WDR59     | chr16 | 74926460/C//G  | nonsynonymous | 1 | 0 |
| VAT1L     | chr16 | 77896747/C//A  | nonsynonymous | 1 | 0 |
| JPH3      | chr16 | 87678560/G//T  | nonsynonymous | 1 | 0 |
| ZZEF1     | chr17 | 4007973/G//A   | synonymous    | 1 | 0 |
| TP53      | chr17 | 7578461/C//A   | nonsynonymous | 1 | 0 |
| CNTROB    | chr17 | 7843483/G//A   | nonsynonymous | 1 | 0 |
| MYO15A    | chr17 | 18022509/C//T  | nonsynonymous | 1 | 0 |
| ALDH3A1   | chr17 | 19642911/G//C  | nonsynonymous | 1 | 0 |
| LGALS9B   | chr17 | 20354898/C//T  | nonsynonymous | 1 | 0 |
| SARM1     | chr17 | 26708775/C//T  | nonsynonymous | 1 | 0 |
| NF1       | chr17 | 29587418/A//G  | nonsynonymous | 1 | 0 |
| EVI2A     | chr17 | 29645568/G//C  | nonsynonymous | 1 | 0 |
| EVI2A     | chr17 | 29645572/G//A  | synonymous    | 1 | 0 |
| NF1       | chr17 | 29654724/C//T  | nonsynonymous | 1 | 0 |
| CDK5R1    | chr17 | 30815538/G//T  | synonymous    | 1 | 0 |
| MMP28     | chr17 | 34095305/C//T  | nonsynonymous | 1 | 0 |
| KRT38     | chr17 | 39596456/G//T  | nonsynonymous | 1 | 0 |
| TMEM92    | chr17 | 48356248/C//A  | nonsynonymous | 1 | 0 |
| PTRH2     | chr17 | 57775303/G//A  | nonsynonymous | 1 | 0 |
| CACNG4    | chr17 | 65026770/G//C  | nonsynonymous | 1 | 0 |
| UNC13D    | chr17 | 73824173/G//A  | synonymous    | 1 | 0 |
| PRCD      | chr17 | 74536649/C//T  | nonsynonymous | 1 | 0 |
| RNF213    | chr17 | 78311731/G//C  | nonsynonymous | 1 | 0 |
| ENDOV     | chr17 | 78389521/C//G  | nonsynonymous | 1 | 0 |



|           |       |               |               |   |   |
|-----------|-------|---------------|---------------|---|---|
| CEP76     | chr18 | 12673455/C//T | nonsynonymous | 1 | 0 |
| SEH1L     | chr18 | 12948110/C//T | synonymous    | 1 | 0 |
| DSC1      | chr18 | 28719849/G//C | nonsynonymous | 1 | 0 |
| DSG2      | chr18 | 29118910/G//T | synonymous    | 1 | 0 |
| SLC39A6   | chr18 | 33694390/C//T | nonsynonymous | 1 | 0 |
| LOXHD1    | chr18 | 44087641/G//T | nonsynonymous | 1 | 0 |
| DCC       | chr18 | 50923746/G//T | synonymous    | 1 | 0 |
| DCC       | chr18 | 50985717/G//A | nonsynonymous | 1 | 0 |
| SERPINB5  | chr18 | 61151660/C//T | synonymous    | 1 | 0 |
| SOCS6     | chr18 | 67992285/C//T | synonymous    | 1 | 0 |
| ZNF236    | chr18 | 74583674/C//G | nonsynonymous | 1 | 0 |
| PRTN3     | chr19 | 843546/G//A   | synonymous    | 1 | 0 |
| PRTN3     | chr19 | 843922/G//A   | nonsynonymous | 1 | 0 |
| DOT1L     | chr19 | 2180709/C//G  | synonymous    | 1 | 0 |
| C19orf35  | chr19 | 2276358/C//G  | nonsynonymous | 1 | 0 |
| C19orf35  | chr19 | 2276386/C//T  | nonsynonymous | 1 | 0 |
| TMPRSS9   | chr19 | 2408554/C//T  | nonsynonymous | 1 | 0 |
| PNPLA6    | chr19 | 7620510/G//C  | nonsynonymous | 1 | 0 |
| MUC16     | chr19 | 9007823/C//A  | nonsynonymous | 1 | 0 |
| MUC16     | chr19 | 9082632/C//A  | nonsynonymous | 1 | 0 |
| OR7D4     | chr19 | 9325343/G//T  | synonymous    | 1 | 0 |
| ZNF491    | chr19 | 11917384/G//T | nonsynonymous | 1 | 0 |
| JUNB      | chr19 | 12903478/A//G | nonsynonymous | 1 | 0 |
| IL27RA    | chr19 | 14163014/C//A | nonsynonymous | 1 | 0 |
| BRD4      | chr19 | 15375222/G//A | nonsynonymous | 1 | 0 |
| BRD4      | chr19 | 15375245/G//C | nonsynonymous | 1 | 0 |
| BRD4      | chr19 | 15376368/G//A | nonsynonymous | 1 | 0 |
| MYO9B     | chr19 | 17256266/C//G | nonsynonymous | 1 | 0 |
| KCNN1     | chr19 | 18084632/C//T | synonymous    | 1 | 0 |
| MAST3     | chr19 | 18235458/G//C | nonsynonymous | 1 | 0 |
| MAU2      | chr19 | 19431858/G//C | nonsynonymous | 1 | 0 |
| ZNF253    | chr19 | 20003149/G//T | nonsynonymous | 1 | 0 |
| ZNF257    | chr19 | 22255730/C//G | synonymous    | 1 | 0 |
| ZNF98     | chr19 | 22574378/A//G | synonymous    | 1 | 0 |
| TSHZ3     | chr19 | 31767750/G//C | synonymous    | 1 | 0 |
| ATP4A     | chr19 | 36046622/G//A | synonymous    | 1 | 0 |
| ZNF585B   | chr19 | 37677661/G//A | nonsynonymous | 1 | 0 |
| EID2B     | chr19 | 40023261/G//C | nonsynonymous | 1 | 0 |
| LGALS13   | chr19 | 40097990/C//A | synonymous    | 1 | 0 |
| CEACAM3   | chr19 | 42315244/G//C | nonsynonymous | 1 | 0 |
|           | chr19 | 44896475/G//C | synonymous    | 1 | 0 |
| CLASRP    | chr19 | 45567278/C//T | nonsynonymous | 1 | 0 |
| CLASRP    | chr19 | 45567673/C//T | synonymous    | 1 | 0 |
| CCDC9     | chr19 | 47768149/C//A | nonsynonymous | 1 | 0 |
| DHX34     | chr19 | 47861273/G//T | nonsynonymous | 1 | 0 |
| EHD2      | chr19 | 48244378/G//C | nonsynonymous | 1 | 0 |
| NUCB1     | chr19 | 49425736/G//T | synonymous    | 1 | 0 |
| HRC       | chr19 | 49657090/T//A | nonsynonymous | 1 | 0 |
| SPIB      | chr19 | 50926966/G//T | synonymous    | 1 | 0 |
| FAM71E1   | chr19 | 50970959/C//G | nonsynonymous | 1 | 0 |
|           | chr19 | 50985126/C//T | synonymous    | 1 | 0 |
| PPP2R1A   | chr19 | 52719823/G//A | synonymous    | 1 | 0 |
| LAIR2     | chr19 | 55019361/G//A | nonsynonymous | 1 | 0 |
| BRSK1     | chr19 | 55805584/C//G | nonsynonymous | 1 | 0 |
| ZNF865    | chr19 | 56127194/C//G | nonsynonymous | 1 | 0 |
| USP29     | chr19 | 57642565/A//T | nonsynonymous | 1 | 0 |
| ZSCAN22   | chr19 | 58846324/C//A | nonsynonymous | 1 | 0 |
| SLC52A3   | chr20 | 744340/G//T   | nonsynonymous | 1 | 0 |
| UBOX5     | chr20 | 3090963/G//A  | synonymous    | 1 | 0 |
| SIGLEC1   | chr20 | 3677868/C//A  | synonymous    | 1 | 0 |
| PROKR2    | chr20 | 5294809/G//T  | synonymous    | 1 | 0 |
| MCM8      | chr20 | 5965591/C//G  | nonsynonymous | 1 | 0 |
| NECAB3    | chr20 | 32247332/C//T | nonsynonymous | 1 | 0 |
| RBL1      | chr20 | 35668613/G//A | nonsynonymous | 1 | 0 |
| PTPRT     | chr20 | 40735470/C//G | nonsynonymous | 1 | 0 |
| SNX21     | chr20 | 44462966/G//T | nonsynonymous | 1 | 0 |
| PMEPA1    | chr20 | 56227302/C//T | nonsynonymous | 1 | 0 |
| KRTAP19-6 | chr21 | 31914008/G//T | nonsynonymous | 1 | 0 |
| PWP2      | chr21 | 45545952/G//C | nonsynonymous | 1 | 0 |
| COL18A1   | chr21 | 46930135/G//T | nonsynonymous | 1 | 0 |

|            |       |                |               |   |   |
|------------|-------|----------------|---------------|---|---|
| THAP7      | chr22 | 21354209/A//G  | nonsynonymous | 1 | 0 |
| SPECC1L    | chr22 | 24718114/G//T  | nonsynonymous | 1 | 0 |
| SGSM1      | chr22 | 25243638/G//T  | synonymous    | 1 | 0 |
| GTPBP1     | chr22 | 39120351/G//T  | nonsynonymous | 1 | 0 |
| SUN2       | chr22 | 39132377/C//T  | synonymous    | 1 | 0 |
| ENTHD1     | chr22 | 40140264/G//T  | nonsynonymous | 1 | 0 |
| FAM118A    | chr22 | 45728463/A//G  | nonsynonymous | 1 | 0 |
| CELSR1     | chr22 | 46761239/C//T  | nonsynonymous | 1 | 0 |
| CERK       | chr22 | 47086028/C//T  | nonsynonymous | 1 | 0 |
| NLGN4X     | chrX  | 6069169/G//C   | nonsynonymous | 1 | 0 |
| VSIG4      | chrX  | 65252485/G//C  | nonsynonymous | 1 | 0 |
| HEPH       | chrX  | 65411995/G//T  | nonsynonymous | 1 | 0 |
| NONO       | chrX  | 70510482/G//T  | synonymous    | 1 | 0 |
| MAGEE1     | chrX  | 75649625/A//T  | synonymous    | 1 | 0 |
| ZCCHC5     | chrX  | 77913882/C//A  | synonymous    | 1 | 0 |
| SH3BGRL    | chrX  | 80457597/C//G  | synonymous    | 1 | 0 |
| TCEAL6     | chrX  | 101395922/C//A | nonsynonymous | 1 | 0 |
| TRPC5      | chrX  | 111095610/G//A | synonymous    | 1 | 0 |
| ZCCHC16    | chrX  | 111698128/C//A | nonsynonymous | 1 | 0 |
| MCF2       | chrX  | 138708799/G//T | nonsynonymous | 1 | 0 |
| HCFC1      | chrX  | 153225812/G//A | nonsynonymous | 1 | 0 |
| MECP2      | chrX  | 153296179/T//C | nonsynonymous | 1 | 0 |
| VAMP7      | chrX  | 155169418/G//T | nonsynonymous | 1 | 0 |
| UTY        | chrY  | 15448202/C//G  | nonsynonymous | 1 | 0 |
| TTN        | chr2  | 179516838/T//G | nonsynonymous | 0 | 1 |
| HSPE1-MOB4 | chr2  | 198404875/C//A | nonsynonymous | 0 | 1 |
|            | chr5  | 76987358/T//C  | synonymous    | 0 | 1 |
| C6orf223   | chr6  | 43968343/T//A  | synonymous    | 0 | 1 |
| ZNF627     | chr19 | 11708414/A//G  | synonymous    | 0 | 1 |
| ACTN2      | chr1  | 236898996/C//G | nonsynonymous | 0 | 1 |
| STEAP3     | chr2  | 120005350/G//A | synonymous    | 0 | 1 |
| SDPR       | chr2  | 192700549/C//T | synonymous    | 0 | 1 |
| RBMS3      | chr3  | 29804395/T//C  | synonymous    | 0 | 1 |
| IRX4       | chr5  | 1878831/G//A   | nonsynonymous | 0 | 1 |
| GRM1       | chr6  | 146719926/G//A | nonsynonymous | 0 | 1 |
| ADGB       | chr6  | 147062272/T//C | synonymous    | 0 | 1 |
| KRTAP5-7   | chr11 | 71238418/T//C  | synonymous    | 0 | 1 |
| ELF1       | chr13 | 41515375/G//T  | nonsynonymous | 0 | 1 |
| FSCB       | chr14 | 44975650/C//A  | nonsynonymous | 0 | 1 |
|            | chr14 | 76525620/C//T  | synonymous    | 0 | 1 |
| CDK5RAP3   | chr17 | 46058832/C//T  | synonymous    | 0 | 1 |
| FBLN1      | chr22 | 45923784/G//A  | nonsynonymous | 0 | 1 |
| CLCN4      | chrX  | 10176538/C//T  | nonsynonymous | 0 | 1 |
| CDX4       | chrX  | 72667577/C//T  | nonsynonymous | 0 | 1 |
| FGGY       | chr1  | 59844482/C//G  | nonsynonymous | 0 | 1 |
| NRXN1      | chr2  | 50318544/T//G  | nonsynonymous | 0 | 1 |
| IWS1       | chr2  | 128253649/G//A | synonymous    | 0 | 1 |
| FIP1L1     | chr4  | 54257307/G//T  | nonsynonymous | 0 | 1 |
| PDZD2      | chr5  | 32093017/G//T  | nonsynonymous | 0 | 1 |
| TTK        | chr6  | 80751855/G//A  | nonsynonymous | 0 | 1 |
| BRAT1      | chr7  | 2578199/A//C   | nonsynonymous | 0 | 1 |
| DDX58      | chr9  | 32492399/A//G  | synonymous    | 0 | 1 |
| GAL3ST3    | chr11 | 65810612/G//T  | nonsynonymous | 0 | 1 |
| P4HA3      | chr11 | 73978275/C//T  | synonymous    | 0 | 1 |
| CNTN5      | chr11 | 99827542/C//A  | synonymous    | 0 | 1 |
| NALCN      | chr13 | 101890123/G//A | nonsynonymous | 0 | 1 |
| BEAN1      | chr16 | 66514563/C//A  | nonsynonymous | 0 | 1 |
| PIK3R6     | chr17 | 8732065/G//A   | nonsynonymous | 0 | 1 |
| NCOR1      | chr17 | 16055279/A//G  | nonsynonymous | 0 | 1 |
| SLC27A1    | chr19 | 17612122/C//A  | synonymous    | 0 | 1 |
| ZNF845     | chr19 | 53856097/G//A  | synonymous    | 0 | 1 |
| NLRP12     | chr19 | 54314024/C//T  | nonsynonymous | 0 | 1 |
| TTC3       | chr21 | 38512955/T//TG | nonsynonymous | 0 | 1 |
| RGAG1      | chrX  | 109698430/C//A | nonsynonymous | 0 | 1 |
| TAS1R2     | chr1  | 19175994/G//T  | synonymous    | 1 | 0 |
| UBR4       | chr1  | 19415267/T//A  | nonsynonymous | 1 | 0 |
| PQLC2      | chr1  | 19653800/G//T  | nonsynonymous | 1 | 0 |
| C1orf234   | chr1  | 23337381/C//T  | synonymous    | 1 | 0 |
| GPN2       | chr1  | 27216603/C//T  | synonymous    | 1 | 0 |
| TGFBR3     | chr1  | 92187590/C//A  | nonsynonymous | 1 | 0 |

|           |      |                   |               |   |   |
|-----------|------|-------------------|---------------|---|---|
| SLC16A4   | chr1 | 110906499/A//G    | synonymous    | 1 | 0 |
| FCRL2     | chr1 | 157739788/C//T    | nonsynonymous | 1 | 0 |
| LRRC52    | chr1 | 165532993/G//C    | nonsynonymous | 1 | 0 |
| RGS18     | chr1 | 192128387/C//A    | nonsynonymous | 1 | 0 |
| IRF6      | chr1 | 209963889/A//T    | synonymous    | 1 | 0 |
| USH2A     | chr1 | 216420117/C//G    | synonymous    | 1 | 0 |
| PXDN      | chr2 | 1668756/G//A      | nonsynonymous | 1 | 0 |
| MAP4K3    | chr2 | 39553298/T//C     | synonymous    | 1 | 0 |
| PSME4     | chr2 | 54152713/C//A     | nonsynonymous | 1 | 0 |
| OTX1      | chr2 | 63281174/C//G     | synonymous    | 1 | 0 |
| ZNF638    | chr2 | 71654391/A//G     | nonsynonymous | 1 | 0 |
| DNAH6     | chr2 | 84864357/G//A     | synonymous    | 1 | 0 |
| EN1       | chr2 | 119600683/G//A    | nonsynonymous | 1 | 0 |
| PTPN4     | chr2 | 120704089/T//C    | synonymous    | 1 | 0 |
| CXCR4     | chr2 | 136872530/C//A    | nonsynonymous | 1 | 0 |
| MARCH7    | chr2 | 160608984/C//A    | nonsynonymous | 1 | 0 |
| TBR1      | chr2 | 162273225/G//A    | nonsynonymous | 1 | 0 |
| SLC4A10   | chr2 | 162762239/T//C    | synonymous    | 1 | 0 |
| TTN       | chr2 | 179594215/G//T    | nonsynonymous | 1 | 0 |
| CD28      | chr2 | 204599609/C//A    | nonsynonymous | 1 | 0 |
| PARD3B    | chr2 | 206023514/G//T    | synonymous    | 1 | 0 |
| UNC80     | chr2 | 210683944/AC//A   | nonsynonymous | 1 | 0 |
| DOCK10    | chr2 | 225639731/G//A    | synonymous    | 1 | 0 |
| IQSEC1    | chr3 | 12983224/G//A     | synonymous    | 1 | 0 |
| CYP8B1    | chr3 | 42916843/C//A     | nonsynonymous | 1 | 0 |
| STAB1     | chr3 | 52556576/C//T     | nonsynonymous | 1 | 0 |
| DNAH12    | chr3 | 57509595/T//C     | nonsynonymous | 1 | 0 |
| BTLA      | chr3 | 112185044/T//G    | nonsynonymous | 1 | 0 |
| ARHGAP31  | chr3 | 119134770/G//T    | nonsynonymous | 1 | 0 |
| RYK       | chr3 | 133896895/CAT//C  | nonsynonymous | 1 | 0 |
| CLSTN2    | chr3 | 140285027/G//T    | nonsynonymous | 1 | 0 |
| HTR3D     | chr3 | 183750728/A//G    | nonsynonymous | 1 | 0 |
| ZNF718    | chr4 | 155880/C//A       | nonsynonymous | 1 | 0 |
| ZNF721    | chr4 | 436217/C//T       | nonsynonymous | 1 | 0 |
| SLIT2     | chr4 | 20530600/T//A     | nonsynonymous | 1 | 0 |
| PCDH7     | chr4 | 30724248/G//T     | nonsynonymous | 1 | 0 |
| EPHA5     | chr4 | 66356264/A//C     | nonsynonymous | 1 | 0 |
| CENPC     | chr4 | 68374716/T//A     | nonsynonymous | 1 | 0 |
| TMPRSS11B | chr4 | 69093792/T//C     | nonsynonymous | 1 | 0 |
| ENAM      | chr4 | 71503558/G//T     | nonsynonymous | 1 | 0 |
| BMPR1B    | chr4 | 96036848/C//G     | nonsynonymous | 1 | 0 |
| FGG       | chr4 | 155531221/T//C    | nonsynonymous | 1 | 0 |
| TLL1      | chr4 | 166929161/T//A    | nonsynonymous | 1 | 0 |
| FAM149A   | chr4 | 187077194/A//T    | nonsynonymous | 1 | 0 |
| CDH18     | chr5 | 19473350/A//C     | synonymous    | 1 | 0 |
| C9        | chr5 | 39341753/C//T     | nonsynonymous | 1 | 0 |
| HAPLN1    | chr5 | 82969250/G//T     | nonsynonymous | 1 | 0 |
| ADGRV1    | chr5 | 90040901/T//C     | nonsynonymous | 1 | 0 |
| PCDHA11   | chr5 | 140249967/C//A    | synonymous    | 1 | 0 |
| PCDHB1    | chr5 | 140431237/C//A    | nonsynonymous | 1 | 0 |
| PCDHB5    | chr5 | 140515745/A//T    | nonsynonymous | 1 | 0 |
| FAM114A2  | chr5 | 153374519/G//A    | nonsynonymous | 1 | 0 |
| TIMD4     | chr5 | 156378738/G//T    | nonsynonymous | 1 | 0 |
| GCM2      | chr6 | 10874768/G//T     | synonymous    | 1 | 0 |
| TDP2      | chr6 | 24667031/A//G     | synonymous    | 1 | 0 |
| TRIM40    | chr6 | 30114824/G//A     | synonymous    | 1 | 0 |
| COL11A2   | chr6 | 33151951/G//A     | nonsynonymous | 1 | 0 |
| DNAH8     | chr6 | 38821058/G//C     | nonsynonymous | 1 | 0 |
| RHAG      | chr6 | 49585879/C//G     | nonsynonymous | 1 | 0 |
| HMGCLL1   | chr6 | 55364076/G//GT    | nonsynonymous | 1 | 0 |
| SPACA1    | chr6 | 88768436/G//A     | nonsynonymous | 1 | 0 |
| FUT9      | chr6 | 96651553/C//A     | nonsynonymous | 1 | 0 |
| MCHR2     | chr6 | 100382373/A//G    | nonsynonymous | 1 | 0 |
| CEP85L    | chr6 | 118803087/G//C    | nonsynonymous | 1 | 0 |
| ADGB      | chr6 | 147103239/A//T    | nonsynonymous | 1 | 0 |
| PLEKHG1   | chr6 | 151152926/G//A    | synonymous    | 1 | 0 |
| HOXA7     | chr7 | 27195942/C//A     | nonsynonymous | 1 | 0 |
| ELMO1     | chr7 | 37172821/TGGCA//T | nonsynonymous | 1 | 0 |
| CDK13     | chr7 | 40085593/A//G     | nonsynonymous | 1 | 0 |
| ZNF804B   | chr7 | 88966283/T//G     | synonymous    | 1 | 0 |

|           |       |                 |               |   |   |
|-----------|-------|-----------------|---------------|---|---|
| TMEM130   | chr7  | 98445672/G//T   | synonymous    | 1 | 0 |
| MUC17     | chr7  | 100681922/G//T  | nonsynonymous | 1 | 0 |
| SND1      | chr7  | 127292423/C//A  | synonymous    | 1 | 0 |
| DGKI      | chr7  | 137076061/C//A  | nonsynonymous | 1 | 0 |
| OR6B1     | chr7  | 143701942/C//G  | nonsynonymous | 1 | 0 |
| WDR60     | chr7  | 158719137/G//T  | nonsynonymous | 1 | 0 |
| CHD7      | chr8  | 61763075/C//A   | synonymous    | 1 | 0 |
| DCSTAMP   | chr8  | 105367193/T//C  | nonsynonymous | 1 | 0 |
| PKHD1L1   | chr8  | 110457826/T//A  | nonsynonymous | 1 | 0 |
| FAM135B   | chr8  | 139209851/A//T  | nonsynonymous | 1 | 0 |
| LY6K      | chr8  | 143784532/G//T  | nonsynonymous | 1 | 0 |
|           | chr8  | 144671206/C//A  | synonymous    | 1 | 0 |
| CDKN2A    | chr9  | 21971017/G//A   | nonsynonymous | 1 | 0 |
| ZNF462    | chr9  | 109688639/G//C  | nonsynonymous | 1 | 0 |
| BARHL1    | chr9  | 135464779/C//A  | nonsynonymous | 1 | 0 |
| TSC1      | chr9  | 135801105/C//A  | nonsynonymous | 1 | 0 |
| ABCA2     | chr9  | 139906796/C//A  | nonsynonymous | 1 | 0 |
| SPAG6     | chr10 | 22678174/G//A   | nonsynonymous | 1 | 0 |
| GPR158    | chr10 | 25510031/G//C   | nonsynonymous | 1 | 0 |
| HNRNPF    | chr10 | 43882712/T//C   | synonymous    | 1 | 0 |
| ALOX5     | chr10 | 45939200/G//T   | nonsynonymous | 1 | 0 |
|           | chr10 | 55570347/C//T   | synonymous    | 1 | 0 |
|           | chr10 | 79814481/A//C   | synonymous    | 1 | 0 |
| TAF5      | chr10 | 105137996/C//A  | nonsynonymous | 1 | 0 |
| FRG2B     | chr10 | 135438858/C//A  | nonsynonymous | 1 | 0 |
| OR56A4    | chr11 | 6024071/G//A    | nonsynonymous | 1 | 0 |
| OR52B2    | chr11 | 6190634/C//A    | nonsynonymous | 1 | 0 |
| FIBIN     | chr11 | 27016550/C//A   | nonsynonymous | 1 | 0 |
| KIAA1549L | chr11 | 33566485/TAA//T | nonsynonymous | 1 | 0 |
| SLC1A2    | chr11 | 35338940/G//T   | synonymous    | 1 | 0 |
| OR5R1     | chr11 | 56185229/G//C   | synonymous    | 1 | 0 |
| TCN1      | chr11 | 59629059/A//G   | nonsynonymous | 1 | 0 |
| MS4A3     | chr11 | 59828646/G//A   | nonsynonymous | 1 | 0 |
| MTMR2     | chr11 | 95574855/T//TG  | nonsynonymous | 1 | 0 |
| TRPC6     | chr11 | 101342020/G//A  | nonsynonymous | 1 | 0 |
| TMPRSS5   | chr11 | 113563894/C//A  | nonsynonymous | 1 | 0 |
| OR10G8    | chr11 | 123900829/A//C  | nonsynonymous | 1 | 0 |
| PATE3     | chr11 | 125659285/G//T  | synonymous    | 1 | 0 |
| KCNA6     | chr12 | 4920569/G//T    | synonymous    | 1 | 0 |
| KMT2D     | chr12 | 49426354/T//C   | nonsynonymous | 1 | 0 |
| KRT74     | chr12 | 52962018/G//A   | synonymous    | 1 | 0 |
| MON2      | chr12 | 62981861/G//T   | nonsynonymous | 1 | 0 |
| KCNMB4    | chr12 | 70824339/C//T   | nonsynonymous | 1 | 0 |
| AACS      | chr12 | 125609287/A//C  | synonymous    | 1 | 0 |
| CHFR      | chr12 | 133428309/C//T  | nonsynonymous | 1 | 0 |
| SKA3      | chr13 | 21742311/C//A   | nonsynonymous | 1 | 0 |
| MTUS2     | chr13 | 29598877/G//C   | nonsynonymous | 1 | 0 |
| KLHL1     | chr13 | 70681571/A//G   | synonymous    | 1 | 0 |
| GZMB      | chr14 | 25100291/T//C   | nonsynonymous | 1 | 0 |
| GPR33     | chr14 | 31953075/C//T   | nonsynonymous | 1 | 0 |
| ANGEL1    | chr14 | 77255689/C//G   | nonsynonymous | 1 | 0 |
| PPP4R4    | chr14 | 94640904/C//A   | synonymous    | 1 | 0 |
| PPP1R13B  | chr14 | 104206346/C//G  | nonsynonymous | 1 | 0 |
| CYFIP1    | chr15 | 22969157/C//G   | synonymous    | 1 | 0 |
| RYR3      | chr15 | 33936626/C//A   | nonsynonymous | 1 | 0 |
| SHC4      | chr15 | 49149902/T//C   | nonsynonymous | 1 | 0 |
| CEMIP     | chr15 | 81234184/G//A   | synonymous    | 1 | 0 |
| NTRK3     | chr15 | 88476420/G//A   | synonymous    | 1 | 0 |
| FAM169B   | chr15 | 98982906/C//T   | nonsynonymous | 1 | 0 |
| PTX4      | chr16 | 1536479/A//T    | nonsynonymous | 1 | 0 |
| RPL3L     | chr16 | 1997279/C//A    | nonsynonymous | 1 | 0 |
| SRRM2     | chr16 | 2820678/G//GA   | nonsynonymous | 1 | 0 |
| CDIP1     | chr16 | 4562627/C//T    | synonymous    | 1 | 0 |
| GRIN2A    | chr16 | 9862919/C//A    | nonsynonymous | 1 | 0 |
| ABCC1     | chr16 | 16150143/G//T   | synonymous    | 1 | 0 |
| GP2       | chr16 | 20334304/A//T   | synonymous    | 1 | 0 |
| ACSM1     | chr16 | 20638641/G//A   | synonymous    | 1 | 0 |
| CLN3      | chr16 | 28488850/C//A   | nonsynonymous | 1 | 0 |
| ZNF469    | chr16 | 88501863/C//G   | nonsynonymous | 1 | 0 |
| TP53      | chr17 | 7578490/A//C    | nonsynonymous | 1 | 0 |

|           |       |                  |               |   |   |
|-----------|-------|------------------|---------------|---|---|
| DHRS7B    | chr17 | 21087744/A/G     | nonsynonymous | 1 | 0 |
| CRLF3     | chr17 | 29123220/T/G     | nonsynonymous | 1 | 0 |
| ATXN7L3   | chr17 | 42275391/T/G     | synonymous    | 1 | 0 |
| IGF2BP1   | chr17 | 47122363/C/T     | nonsynonymous | 1 | 0 |
| ENPP7     | chr17 | 77708843/G//A    | nonsynonymous | 1 | 0 |
| NOL4      | chr18 | 31538256/C//A    | nonsynonymous | 1 | 0 |
| CCDC102B  | chr18 | 66541921/G//T    | nonsynonymous | 1 | 0 |
| EVI5L     | chr19 | 7911409/G//A     | synonymous    | 1 | 0 |
| MUC16     | chr19 | 9017003/C//A     | nonsynonymous | 1 | 0 |
| ICAM1     | chr19 | 10395145/A//G    | nonsynonymous | 1 | 0 |
| PRKCSH    | chr19 | 11548753/C//T    | synonymous    | 1 | 0 |
| MRI1      | chr19 | 13875781/G//A    | nonsynonymous | 1 | 0 |
| RAB8A     | chr19 | 16232590/G//A    | synonymous    | 1 | 0 |
| TMEM38A   | chr19 | 16797155/G//T    | nonsynonymous | 1 | 0 |
| CEP89     | chr19 | 33430789/C//T    | nonsynonymous | 1 | 0 |
| PDCD2L    | chr19 | 34895662/C//T    | nonsynonymous | 1 | 0 |
| ATP1A3    | chr19 | 42492166/C//A    | synonymous    | 1 | 0 |
| PSG11     | chr19 | 43530583/C//A    | synonymous    | 1 | 0 |
| DMWD      | chr19 | 46288981/G//A    | synonymous    | 1 | 0 |
| PRR12     | chr19 | 50124811/A//G    | nonsynonymous | 1 | 0 |
| MYBPC2    | chr19 | 50938469/A//G    | nonsynonymous | 1 | 0 |
| CEACAM18  | chr19 | 51983625/C//A    | nonsynonymous | 1 | 0 |
| PEG3      | chr19 | 57327547/T//A    | nonsynonymous | 1 | 0 |
| ZNF772    | chr19 | 57988758/T//A    | synonymous    | 1 | 0 |
| ZNF419    | chr19 | 58005010/G//A    | nonsynonymous | 1 | 0 |
| RBCK1     | chr20 | 401662/C//T      | nonsynonymous | 1 | 0 |
| PAK5      | chr20 | 9560813/C//A     | nonsynonymous | 1 | 0 |
| MACROD2   | chr20 | 15866458/T//A    | nonsynonymous | 1 | 0 |
| DTD1      | chr20 | 18576673/G//A    | nonsynonymous | 1 | 0 |
| C20orf78  | chr20 | 18810827/G//T    | synonymous    | 1 | 0 |
| ZNF341    | chr20 | 32369109/T//C    | synonymous    | 1 | 0 |
| ZNFX1     | chr20 | 47869275/A//G    | synonymous    | 1 | 0 |
| KRTAP13-2 | chr21 | 31744537/C//T    | synonymous    | 1 | 0 |
| P2RX6     | chr22 | 21381027/C//T    | synonymous    | 1 | 0 |
| ANKRD54   | chr22 | 38228970/T//C    | nonsynonymous | 1 | 0 |
| ZC3H7B    | chr22 | 41752341/G//A    | synonymous    | 1 | 0 |
| SMS       | chrX  | 21997031/A//G    | nonsynonymous | 1 | 0 |
| DMD       | chrX  | 32360321/C//A    | nonsynonymous | 1 | 0 |
| FAM133A   | chrX  | 92965053/G//C    | nonsynonymous | 1 | 0 |
| MORC4     | chrX  | 106186060/G//T   | nonsynonymous | 1 | 0 |
| MAGEC3    | chrX  | 140983132/T//G   | nonsynonymous | 1 | 0 |
| LCE1E     | chr1  | 152759950/A//G   | nonsynonymous | 0 | 1 |
| SCN3A     | chr2  | 166003539/C//A   | nonsynonymous | 0 | 1 |
| ZDBF2     | chr2  | 207173138/G//A   | nonsynonymous | 0 | 1 |
| PECR      | chr2  | 216946472/G//C   | synonymous    | 0 | 1 |
| CATIP     | chr2  | 219221813/T//C   | synonymous    | 0 | 1 |
| MINA      | chr3  | 97673296/G//A    | nonsynonymous | 0 | 1 |
| TF        | chr3  | 133485261/C//T   | synonymous    | 0 | 1 |
| PRR23C    | chr3  | 138763069/C//T   | nonsynonymous | 0 | 1 |
| PCOLCE2   | chr3  | 142537195/T//A   | nonsynonymous | 0 | 1 |
| FAM193A   | chr4  | 2695335/C//A     | nonsynonymous | 0 | 1 |
| GRID2     | chr4  | 94128609/G//A    | nonsynonymous | 0 | 1 |
| PCDHAC2   | chr5  | 140348518/A//G   | nonsynonymous | 0 | 1 |
| PCDHB15   | chr5  | 140627399/C//T   | synonymous    | 0 | 1 |
| GRM6      | chr5  | 178413475/C//T   | nonsynonymous | 0 | 1 |
| UTRN      | chr6  | 144844161/G//T   | nonsynonymous | 0 | 1 |
| CSMD1     | chr8  | 2820916/G//A     | synonymous    | 0 | 1 |
| COL15A1   | chr9  | 101706315/C//T   | synonymous    | 0 | 1 |
| ANK3      | chr10 | 61835684/TTAA//T | nonsynonymous | 0 | 1 |
| LUZP2     | chr11 | 24753667/T//A    | nonsynonymous | 0 | 1 |
| NRXN3     | chr14 | 79454485/G//A    | nonsynonymous | 0 | 1 |
| AQR       | chr15 | 35253019/T//C    | synonymous    | 0 | 1 |
| ZNF205    | chr16 | 3170156/C//T     | nonsynonymous | 0 | 1 |
| RNF40     | chr16 | 30783423/G//A    | nonsynonymous | 0 | 1 |
| ZNF799    | chr19 | 12502412/G//A    | nonsynonymous | 0 | 1 |
| ZNF93     | chr19 | 20044889/C//A    | synonymous    | 0 | 1 |
| ZNF600    | chr19 | 53270784/G//T    | nonsynonymous | 0 | 1 |
| TMC4      | chr19 | 54667551/G//A    | synonymous    | 0 | 1 |
| KRTAP19-4 | chr21 | 31869296/C//T    | nonsynonymous | 0 | 1 |
| RRP1B     | chr21 | 45107760/C//T    | nonsynonymous | 0 | 1 |

|              |       |                 |               |   |   |
|--------------|-------|-----------------|---------------|---|---|
| GGT1         | chr22 | 25007132/A//G   | synonymous    | 0 | 1 |
| NR1I3        | chr1  | 161200707/G//A  | synonymous    | 0 | 1 |
| PATE4        | chr11 | 125708198/C//A  | synonymous    | 0 | 1 |
| FOXO1        | chr13 | 41133688/G//A   | nonsynonymous | 0 | 1 |
| HERC2        | chr15 | 28356991/T//G   | nonsynonymous | 0 | 1 |
| FADS6        | chr17 | 72889685/G//A   | synonymous    | 0 | 1 |
| TRIM28       | chr19 | 59056419/G//A   | nonsynonymous | 0 | 1 |
| MOB1A        | chr2  | 74405956/C//G   | synonymous    | 0 | 1 |
| LOC102724428 | chr21 | 44837551/G//A   | synonymous    | 0 | 1 |
| GRAMD4       | chr22 | 47022753/C//T   | synonymous    | 0 | 1 |
| PCDHB8       | chr5  | 140558317/C//G  | synonymous    | 0 | 1 |
| MMEL1        | chr1  | 2541230/C//T    | synonymous    | 0 | 1 |
| AHDC1        | chr1  | 27874481/C//T   | synonymous    | 0 | 1 |
| PHACTR4      | chr1  | 28800071/C//T   | synonymous    | 0 | 1 |
| KHDRBS1      | chr1  | 32508212/A//G   | nonsynonymous | 0 | 1 |
| ROR1         | chr1  | 64608187/A//C   | nonsynonymous | 0 | 1 |
| HIPK1        | chr1  | 114483921/C//T  | nonsynonymous | 0 | 1 |
| IGSF3        | chr1  | 117142835/G//A  | nonsynonymous | 0 | 1 |
| ARHGEF2      | chr1  | 155938954/G//A  | synonymous    | 0 | 1 |
| ETV3         | chr1  | 157095674/C//T  | synonymous    | 0 | 1 |
| COPA         | chr1  | 160305051/C//T  | nonsynonymous | 0 | 1 |
| PAPPA2       | chr1  | 176563716/C//T  | nonsynonymous | 0 | 1 |
| PXDN         | chr2  | 1670017/G//A    | synonymous    | 0 | 1 |
| SRBD1        | chr2  | 45620101/C//T   | nonsynonymous | 0 | 1 |
| AAK1         | chr2  | 69732795/G//A   | synonymous    | 0 | 1 |
| ST6GAL2      | chr2  | 107459657/C//T  | synonymous    | 0 | 1 |
| AMER3        | chr2  | 131520745/T//C  | nonsynonymous | 0 | 1 |
| FASTKD1      | chr2  | 170428416/G//A  | nonsynonymous | 0 | 1 |
| PDK1         | chr2  | 173457728/G//C  | nonsynonymous | 0 | 1 |
| TTN          | chr2  | 179649066/C//T  | nonsynonymous | 0 | 1 |
| CCDC36       | chr3  | 49294248/G//A   | nonsynonymous | 0 | 1 |
| SI           | chr3  | 164777683/T//C  | synonymous    | 0 | 1 |
| ADGRL3       | chr4  | 62598506/C//A   | nonsynonymous | 0 | 1 |
| EPHA5        | chr4  | 66230819/G//A   | nonsynonymous | 0 | 1 |
|              | chr4  | 71665917/C//A   | synonymous    | 0 | 1 |
| PITX2        | chr4  | 111539468/G//A  | nonsynonymous | 0 | 1 |
| ANK2         | chr4  | 114199051/T//G  | nonsynonymous | 0 | 1 |
| FBXL7        | chr5  | 15928350/C//T   | nonsynonymous | 0 | 1 |
| CD180        | chr5  | 66479727/G//A   | nonsynonymous | 0 | 1 |
| PCDHA13      | chr5  | 140263638/C//T  | synonymous    | 0 | 1 |
| PCDHGB2      | chr5  | 140741694/C//T  | synonymous    | 0 | 1 |
| HIST1H3I     | chr6  | 27840069/G//A   | nonsynonymous | 0 | 1 |
| ZNF311       | chr6  | 28963337/C//T   | nonsynonymous | 0 | 1 |
| MTCH1        | chr6  | 36953902/G//T   | synonymous    | 0 | 1 |
|              | chr6  | 56481129/G//A   | synonymous    | 0 | 1 |
| FBXL4        | chr6  | 99365519/G//C   | nonsynonymous | 0 | 1 |
| COL10A1      | chr6  | 116442924/C//T  | nonsynonymous | 0 | 1 |
| LPA          | chr6  | 160978540/G//A  | synonymous    | 0 | 1 |
| AFDN         | chr6  | 168315993/G//A  | synonymous    | 0 | 1 |
| ZNF736       | chr7  | 63809448/G//A   | nonsynonymous | 0 | 1 |
| TRRAP        | chr7  | 98535281/A//T   | nonsynonymous | 0 | 1 |
| GPC2         | chr7  | 99773327/C//G   | nonsynonymous | 0 | 1 |
| GIMAP1       | chr7  | 150417172/C//T  | nonsynonymous | 0 | 1 |
| EXTL3        | chr8  | 28573891/C//T   | synonymous    | 0 | 1 |
| C9orf66      | chr9  | 215209/G//A     | nonsynonymous | 0 | 1 |
| CNTLN        | chr9  | 17394657/TAC//T | nonsynonymous | 0 | 1 |
| TRPM3        | chr9  | 73152239/G//A   | nonsynonymous | 0 | 1 |
|              | chr9  | 74477530/A//T   | synonymous    | 0 | 1 |
| SHC3         | chr9  | 91657028/C//T   | nonsynonymous | 0 | 1 |
| NOL8         | chr9  | 95077787/G//A   | nonsynonymous | 0 | 1 |
| COL27A1      | chr9  | 116931433/G//C  | nonsynonymous | 0 | 1 |
| KIF11        | chr10 | 94381149/C//T   | nonsynonymous | 0 | 1 |
| ATRNL1       | chr10 | 116919910/C//T  | synonymous    | 0 | 1 |
| IFITM2       | chr11 | 309199/C//G     | synonymous    | 0 | 1 |
| B4GALNT4     | chr11 | 380410/G//A     | nonsynonymous | 0 | 1 |
| OR4C16       | chr11 | 55340288/G//T   | nonsynonymous | 0 | 1 |
| PYGM         | chr11 | 64514805/G//A   | nonsynonymous | 0 | 1 |
| OR10G8       | chr11 | 123900645/C//A  | nonsynonymous | 0 | 1 |
| PLXNC1       | chr12 | 94673392/C//A   | nonsynonymous | 0 | 1 |
| LTA4H        | chr12 | 96429326/C//T   | synonymous    | 0 | 1 |

|           |       |                   |               |   |   |
|-----------|-------|-------------------|---------------|---|---|
| TMTC4     | chr13 | 101264658/T//C    | synonymous    | 0 | 1 |
| AHNAK2    | chr14 | 105418199/C//G    | nonsynonymous | 0 | 1 |
| CTDSP2    | chr15 | 44776443/A//C     | nonsynonymous | 0 | 1 |
| RASGRF1   | chr15 | 79382616/G//A     | synonymous    | 0 | 1 |
| TNFRSF12A | chr16 | 3070438/G//A      | nonsynonymous | 0 | 1 |
| SLC12A3   | chr16 | 56918064/C//T     | synonymous    | 0 | 1 |
| CCDC113   | chr16 | 58293780/G//A     | nonsynonymous | 0 | 1 |
| PHLPP2    | chr16 | 71689260/C//G     | nonsynonymous | 0 | 1 |
| VTN       | chr17 | 26694992/G//A     | synonymous    | 0 | 1 |
| CCL7      | chr17 | 32598748/C//A     | nonsynonymous | 0 | 1 |
| KRT33A    | chr17 | 39504881/C//T     | nonsynonymous | 0 | 1 |
| ATP6V0A1  | chr17 | 40622210/C//A     | nonsynonymous | 0 | 1 |
| KIF2B     | chr17 | 51900267/G//A     | synonymous    | 0 | 1 |
| KIF2B     | chr17 | 51900872/C//T     | nonsynonymous | 0 | 1 |
| CA4       | chr17 | 58235127/C//T     | nonsynonymous | 0 | 1 |
| RHBDF2    | chr17 | 74473778/G//A     | synonymous    | 0 | 1 |
| DSEL      | chr18 | 65178219/C//T     | synonymous    | 0 | 1 |
| C19orf12  | chr19 | 30193733/G//A     | synonymous    | 0 | 1 |
| LTBP4     | chr19 | 41132965/C//T     | synonymous    | 0 | 1 |
| IGLON5    | chr19 | 51830117/C//T     | nonsynonymous | 0 | 1 |
| ZNF528    | chr19 | 52919895/G//T     | nonsynonymous | 0 | 1 |
| LAMA5     | chr20 | 60893632/G//A     | nonsynonymous | 0 | 1 |
| DGCR2     | chr22 | 19026298/G//C     | synonymous    | 0 | 1 |
| SGSM1     | chr22 | 25270520/C//T     | nonsynonymous | 0 | 1 |
| SH3BGRL   | chrX  | 80533877/C//T     | synonymous    | 0 | 1 |
| HTR2C     | chrX  | 113965848/G//A    | nonsynonymous | 0 | 1 |
| AADA4     | chr1  | 12711251/G//A     | nonsynonymous | 1 | 0 |
| DDOST     | chr1  | 20987697/G//T     | nonsynonymous | 1 | 0 |
| HECTD3    | chr1  | 45469408/C//T     | nonsynonymous | 1 | 0 |
| KCND3     | chr1  | 112525257/G//A    | nonsynonymous | 1 | 0 |
|           | chr1  | 155658228/G//A    | synonymous    | 1 | 0 |
| DHX9      | chr1  | 182852461/A//G    | synonymous    | 1 | 0 |
| USH2A     | chr1  | 216260092/C//T    | synonymous    | 1 | 0 |
| MSH6      | chr2  | 48026269/A//C     | synonymous    | 1 | 0 |
| CLK1      | chr2  | 201726566/G//A    | nonsynonymous | 1 | 0 |
| RAPH1     | chr2  | 204354447/C//T    | nonsynonymous | 1 | 0 |
| MDH1B     | chr2  | 207604353/T//A    | nonsynonymous | 1 | 0 |
|           | chr2  | 238647952/G//A    | synonymous    | 1 | 0 |
| STAC      | chr3  | 36570364/T//G     | nonsynonymous | 1 | 0 |
| MCM2      | chr3  | 127338106/G//C    | synonymous    | 1 | 0 |
| AHSG      | chr3  | 186335024/C//A    | nonsynonymous | 1 | 0 |
| MASP1     | chr3  | 186937921/C//G    | nonsynonymous | 1 | 0 |
| CCDC50    | chr3  | 191087779/C//T    | synonymous    | 1 | 0 |
| LYAR      | chr4  | 4276203/G//T      | synonymous    | 1 | 0 |
| ADH1A     | chr4  | 100203628/C//T    | nonsynonymous | 1 | 0 |
| MCUB      | chr4  | 110606494/TACA//T | nonsynonymous | 1 | 0 |
| ANK2      | chr4  | 114153375/A//G    | nonsynonymous | 1 | 0 |
| LARP1B    | chr4  | 129131169/A//T    | nonsynonymous | 1 | 0 |
| FBXW7     | chr4  | 153332826/G//A    | nonsynonymous | 1 | 0 |
| APC       | chr5  | 112175095/AAT//A  | nonsynonymous | 1 | 0 |
| SLC4A9    | chr5  | 139743402/C//T    | nonsynonymous | 1 | 0 |
| PCDHB1    | chr5  | 140431468/C//T    | nonsynonymous | 1 | 0 |
| STK32A    | chr5  | 146730662/G//A    | synonymous    | 1 | 0 |
| FAT2      | chr5  | 150922622/G//A    | nonsynonymous | 1 | 0 |
| ZNF391    | chr6  | 27368827/T//C     | synonymous    | 1 | 0 |
| MCHR2     | chr6  | 100395746/C//A    | nonsynonymous | 1 | 0 |
| SEPT7     | chr7  | 35923586/G//C     | nonsynonymous | 1 | 0 |
| HGF       | chr7  | 81399245/C//T     | nonsynonymous | 1 | 0 |
| EZH2      | chr7  | 148504759/T//A    | nonsynonymous | 1 | 0 |
| ZNF398    | chr7  | 148876317/C//T    | synonymous    | 1 | 0 |
| GSDMC     | chr8  | 130789650/G//A    | nonsynonymous | 1 | 0 |
| IFNW1     | chr9  | 21141555/G//A     | synonymous    | 1 | 0 |
| KIF27     | chr9  | 86530211/A//G     | nonsynonymous | 1 | 0 |
| AFAP1L2   | chr10 | 116055783/T//G    | synonymous    | 1 | 0 |
| DPYSL4    | chr10 | 134014433/C//T    | synonymous    | 1 | 0 |
| PAX6      | chr11 | 31815600/G//C     | nonsynonymous | 1 | 0 |
| OR4C11    | chr11 | 55371464/C//T     | nonsynonymous | 1 | 0 |
| FGF4      | chr11 | 69588116/C//T     | synonymous    | 1 | 0 |
| TENM4     | chr11 | 78440584/G//C     | nonsynonymous | 1 | 0 |
| STT3A     | chr11 | 125478028/G//T    | nonsynonymous | 1 | 0 |

|          |       |                   |               |   |   |
|----------|-------|-------------------|---------------|---|---|
| CHD4     | chr12 | 6711326/G//A      | nonsynonymous | 1 | 0 |
| TMEM132B | chr12 | 126138519/C//T    | nonsynonymous | 1 | 0 |
| SACS     | chr13 | 23908639/G//C     | nonsynonymous | 1 | 0 |
| PARP4    | chr13 | 25058885/C//A     | nonsynonymous | 1 | 0 |
| DCLK1    | chr13 | 36428695/G//A     | nonsynonymous | 1 | 0 |
| MYO16    | chr13 | 109318373/C//T    | synonymous    | 1 | 0 |
| NDRG2    | chr14 | 21486174/G//C     | nonsynonymous | 1 | 0 |
| ANPEP    | chr15 | 90347621/C//A     | nonsynonymous | 1 | 0 |
| USP31    | chr16 | 23080221/T//A     | nonsynonymous | 1 | 0 |
| PALB2    | chr16 | 23619229/G//A     | synonymous    | 1 | 0 |
| IL21R    | chr16 | 27455948/T//G     | nonsynonymous | 1 | 0 |
| MYH8     | chr17 | 10318675/G//A     | synonymous    | 1 | 0 |
| FZD2     | chr17 | 42635766/C//G     | nonsynonymous | 1 | 0 |
| NOG      | chr17 | 54672083/C//T     | nonsynonymous | 1 | 0 |
| MPO      | chr17 | 56355502/G//A     | nonsynonymous | 1 | 0 |
| TANC2    | chr17 | 61473124/C//T     | synonymous    | 1 | 0 |
| CASKIN2  | chr17 | 73500919/C//A     | nonsynonymous | 1 | 0 |
| DNAH17   | chr17 | 76486909/G//A     | synonymous    | 1 | 0 |
| GAA      | chr17 | 78086718/C//T     | synonymous    | 1 | 0 |
| EPB41L3  | chr18 | 5419724/G//A      | nonsynonymous | 1 | 0 |
| DNM2     | chr19 | 10887882/G//A     | synonymous    | 1 | 0 |
| ZNF709   | chr19 | 12575517/A//T     | nonsynonymous | 1 | 0 |
| PRKACA   | chr19 | 14208621/G//A     | synonymous    | 1 | 0 |
| GATAD2A  | chr19 | 19609311/C//A     | synonymous    | 1 | 0 |
| ZNF208   | chr19 | 22155691/A//G     | synonymous    | 1 | 0 |
| NUDT19   | chr19 | 33200188/CCTCT//C | nonsynonymous | 1 | 0 |
| FBXO17   | chr19 | 39435697/C//T     | nonsynonymous | 1 | 0 |
| SUPT5H   | chr19 | 39965358/G//A     | synonymous    | 1 | 0 |
| CEACAM21 | chr19 | 42085788/T//A     | nonsynonymous | 1 | 0 |
| SRRM5    | chr19 | 44116502/C//T     | nonsynonymous | 1 | 0 |
| EPS8L1   | chr19 | 55592678/G//T     | nonsynonymous | 1 | 0 |
| KIAA1755 | chr20 | 36874362/C//T     | nonsynonymous | 1 | 0 |
| RBPJL    | chr20 | 43940894/G//C     | nonsynonymous | 1 | 0 |
| COL9A3   | chr20 | 61468445/A//G     | synonymous    | 1 | 0 |
| ELFN2    | chr22 | 37770993/G//A     | synonymous    | 1 | 0 |
| NHS      | chrX  | 17745463/T//C     | synonymous    | 1 | 0 |
| KIAA2022 | chrX  | 73959338/A//G     | synonymous    | 1 | 0 |
| TENM1    | chrX  | 123518560/T//G    | nonsynonymous | 1 | 0 |
| DCAF12L2 | chrX  | 125298944/C//T    | nonsynonymous | 1 | 0 |
| CAMSAP2  | chr1  | 200822405/G//A    | nonsynonymous | 0 | 1 |
| PSD4     | chr2  | 113953346/G//A    | nonsynonymous | 0 | 1 |
| MAML3    | chr4  | 140646965/G//T    | synonymous    | 0 | 1 |
| ERBIN    | chr5  | 65349668/G//A     | nonsynonymous | 0 | 1 |
|          | chr6  | 43399821/G//A     | synonymous    | 0 | 1 |
| VENTX    | chr10 | 135053603/C//T    | synonymous    | 0 | 1 |
| LRR4C    | chr11 | 40136424/A//G     | synonymous    | 0 | 1 |
| GLT1D1   | chr12 | 129442144/G//A    | nonsynonymous | 0 | 1 |
| TBL3     | chr16 | 2026949/G//A      | nonsynonymous | 0 | 1 |
| ZFR2     | chr19 | 3827588/C//T      | nonsynonymous | 0 | 1 |
| CASS4    | chr20 | 55033453/C//T     | nonsynonymous | 0 | 1 |
| PBDC1    | chrX  | 75392990/G//T     | nonsynonymous | 0 | 1 |
| UEVLD    | chr11 | 18568435/G//A     | nonsynonymous | 1 | 0 |
| NCOR1    | chr17 | 15960927/G//A     | nonsynonymous | 1 | 0 |
| BCL9     | chr1  | 147091043/G//T    | nonsynonymous | 0 | 1 |
| GPR161   | chr1  | 168065851/G//A    | nonsynonymous | 0 | 1 |
| EFCAB2   | chr1  | 245246963/G//C    | nonsynonymous | 0 | 1 |
| XCR1     | chr3  | 46063022/C//T     | nonsynonymous | 0 | 1 |
| ZNF717   | chr3  | 75787194/C//T     | nonsynonymous | 0 | 1 |
| ITGB5    | chr3  | 124567148/T//C    | synonymous    | 0 | 1 |
| TRIM42   | chr3  | 140419756/G//C    | nonsynonymous | 0 | 1 |
| APOD     | chr3  | 195295950/C//A    | nonsynonymous | 0 | 1 |
| APC      | chr5  | 112174833/T//G    | nonsynonymous | 0 | 1 |
|          | chr7  | 34917833/G//T     | synonymous    | 0 | 1 |
| CLDN4    | chr7  | 73245608/C//T     | nonsynonymous | 0 | 1 |
| CHID1    | chr11 | 902274/G//A       | synonymous    | 0 | 1 |
| SLC43A1  | chr11 | 57252562/G//A     | synonymous    | 0 | 1 |
| NBEA     | chr13 | 36229880/A//G     | nonsynonymous | 0 | 1 |
| FREM2    | chr13 | 39446912/C//T     | nonsynonymous | 0 | 1 |
| RNASE11  | chr14 | 21052358/A//C     | synonymous    | 0 | 1 |
| ATG2B    | chr14 | 96798938/G//C     | nonsynonymous | 0 | 1 |



|          |       |                  |               |   |   |
|----------|-------|------------------|---------------|---|---|
| TDRD9    | chr14 | 104491992/C//T   | nonsynonymous | 0 | 1 |
| ZNF594   | chr17 | 5086092/G//T     | nonsynonymous | 0 | 1 |
| TP53     | chr17 | 7578475/G//A     | nonsynonymous | 0 | 1 |
| PIPOX    | chr17 | 27381673/C//T    | synonymous    | 0 | 1 |
| ESCO1    | chr18 | 19154044/G//A    | nonsynonymous | 0 | 1 |
| ZNF20    | chr19 | 12243769/C//T    | nonsynonymous | 0 | 1 |
| RSPH6A   | chr19 | 46308136/G//A    | nonsynonymous | 0 | 1 |
| CCDC61   | chr19 | 46520028/C//G    | nonsynonymous | 0 | 1 |
| YWHAB    | chr20 | 43532699/A//C    | nonsynonymous | 0 | 1 |
| ZBP1     | chr20 | 56188364/C//G    | nonsynonymous | 0 | 1 |
| SLC25A17 | chr22 | 41195070/C//A    | nonsynonymous | 0 | 1 |
| TBL1X    | chrX  | 9679803/T//C     | nonsynonymous | 0 | 1 |
| OTUD6A   | chrX  | 69283143/G//C    | nonsynonymous | 0 | 1 |
| PLXNB3   | chrX  | 153033043/G//A   | nonsynonymous | 0 | 1 |
| AGO4     | chr1  | 36297040/G//A    | synonymous    | 0 | 1 |
| BTF3L4   | chr1  | 52530527/C//T    | nonsynonymous | 0 | 1 |
| OR2T1    | chr1  | 248569520/T//A   | synonymous    | 0 | 1 |
| SCN3A    | chr2  | 166032716/A//G   | synonymous    | 0 | 1 |
| GBX2     | chr2  | 237076454/A//G   | nonsynonymous | 0 | 1 |
| PCDH7    | chr4  | 30724207/G//A    | nonsynonymous | 0 | 1 |
| SH3D19   | chr4  | 152053536/C//A   | nonsynonymous | 0 | 1 |
| CD180    | chr5  | 66479864/C//T    | synonymous    | 0 | 1 |
| VCAN     | chr5  | 82816946/C//A    | nonsynonymous | 0 | 1 |
| FAM81B   | chr5  | 94784045/C//G    | nonsynonymous | 0 | 1 |
| MCC      | chr5  | 112437487/A//T   | synonymous    | 0 | 1 |
| TRIM31   | chr6  | 30071922/A//C    | nonsynonymous | 0 | 1 |
| C6orf226 | chr6  | 42858380/G//A    | synonymous    | 0 | 1 |
| COL12A1  | chr6  | 75865571/C//T    | nonsynonymous | 0 | 1 |
| MMRN2    | chr10 | 88702351/A//C    | synonymous    | 0 | 1 |
| DHRS4L2  | chr14 | 24458201/G//C    | nonsynonymous | 0 | 1 |
| TIGD7    | chr16 | 3350459/A//T     | synonymous    | 0 | 1 |
| SLC6A2   | chr16 | 55729208/C//T    | synonymous    | 0 | 1 |
| RYR1     | chr19 | 38942419/G//C    | nonsynonymous | 0 | 1 |
| NUDT10   | chrX  | 51075841/A//G    | synonymous    | 0 | 1 |
| GPR50    | chrX  | 150348483/G//A   | nonsynonymous | 0 | 1 |
| PADI6    | chr1  | 17720860/T//C    | nonsynonymous | 1 | 0 |
| NKAIN1   | chr1  | 31656799/C//A    | synonymous    | 1 | 0 |
| STK40    | chr1  | 36819977/A//T    | nonsynonymous | 1 | 0 |
| GBP3     | chr1  | 89476668/T//C    | synonymous    | 1 | 0 |
| ABCD3    | chr1  | 94955523/C//T    | synonymous    | 1 | 0 |
|          | chr1  | 100950069/T//A   | synonymous    | 1 | 0 |
| FLG      | chr1  | 152280094/T//A   | nonsynonymous | 1 | 0 |
| BCAN     | chr1  | 156627487/T//C   | nonsynonymous | 1 | 0 |
| DUSP23   | chr1  | 159751082/C//T   | synonymous    | 1 | 0 |
| PIGM     | chr1  | 160001056/G//C   | synonymous    | 1 | 0 |
| MAEL     | chr1  | 166974631/C//A   | nonsynonymous | 1 | 0 |
| XCL1     | chr1  | 168549415/T//A   | nonsynonymous | 1 | 0 |
| CFH      | chr1  | 196648809/A//G   | nonsynonymous | 1 | 0 |
| OSR1     | chr2  | 19552915/G//C    | nonsynonymous | 1 | 0 |
| PLB1     | chr2  | 28828759/A//G    | nonsynonymous | 1 | 0 |
| VIT      | chr2  | 36994354/G//T    | nonsynonymous | 1 | 0 |
| CTNNA2   | chr2  | 80085237/G//A    | nonsynonymous | 1 | 0 |
| MARCO    | chr2  | 119731958/G//A   | synonymous    | 1 | 0 |
| HECW2    | chr2  | 197087019/A//C   | nonsynonymous | 1 | 0 |
|          | chr2  | 202027946/A//G   | synonymous    | 1 | 0 |
| CXCR2    | chr2  | 219000428/C//A   | nonsynonymous | 1 | 0 |
| DNER     | chr2  | 230312058/G//A   | nonsynonymous | 1 | 0 |
| ING5     | chr2  | 242651426/G//A   | nonsynonymous | 1 | 0 |
| KAT2B    | chr3  | 20178532/C//CTTT | nonsynonymous | 1 | 0 |
| PLCD1    | chr3  | 38052782/T//C    | nonsynonymous | 1 | 0 |
| TMIE     | chr3  | 46742983/G//T    | synonymous    | 1 | 0 |
| PLXND1   | chr3  | 129284220/G//T   | nonsynonymous | 1 | 0 |
| GMPS     | chr3  | 155652818/A//C   | nonsynonymous | 1 | 0 |
| FNDC3B   | chr3  | 171969142/G//A   | nonsynonymous | 1 | 0 |
| SOD3     | chr4  | 24801260/C//T    | synonymous    | 1 | 0 |
| KLHL5    | chr4  | 39064521/A//T    | synonymous    | 1 | 0 |
| FIP1L1   | chr4  | 54245266/G//C    | nonsynonymous | 1 | 0 |
| ALB      | chr4  | 74282003/C//T    | nonsynonymous | 1 | 0 |
| ANXA3    | chr4  | 79525498/A//G    | nonsynonymous | 1 | 0 |
| WDFY3    | chr4  | 85609382/T//C    | nonsynonymous | 1 | 0 |

|          |       |                 |               |   |   |
|----------|-------|-----------------|---------------|---|---|
| FBXW7    | chr4  | 153244219/T//C  | synonymous    | 1 | 0 |
| MUC22    | chr6  | 30993985/G//C   | synonymous    | 1 | 0 |
| SPDEF    | chr6  | 34511800/C//T   | nonsynonymous | 1 | 0 |
| PKHD1    | chr6  | 51747908/C//G   | nonsynonymous | 1 | 0 |
| POPDC3   | chr6  | 105607581/C//T  | synonymous    | 1 | 0 |
| SASH1    | chr6  | 148865843/G//T  | synonymous    | 1 | 0 |
| LMTK2    | chr7  | 97823423/G//T   | nonsynonymous | 1 | 0 |
| TRIM24   | chr7  | 138269649/C//T  | nonsynonymous | 1 | 0 |
| PARP12   | chr7  | 139726085/G//A  | synonymous    | 1 | 0 |
| OR9A4    | chr7  | 141619594/C//T  | nonsynonymous | 1 | 0 |
| KCNU1    | chr8  | 36675170/T//A   | nonsynonymous | 1 | 0 |
| ZFPM2    | chr8  | 106814002/A//G  | synonymous    | 1 | 0 |
| COL22A1  | chr8  | 139833607/A//T  | synonymous    | 1 | 0 |
| SLC39A4  | chr8  | 145640240/A//T  | nonsynonymous | 1 | 0 |
| FNBP1    | chr9  | 132652692/C//G  | synonymous    | 1 | 0 |
| NOTCH1   | chr9  | 139400097/G//A  | synonymous    | 1 | 0 |
| PHYHIP1  | chr10 | 60994215/C//A   | nonsynonymous | 1 | 0 |
| MYOF     | chr10 | 95069887/A//C   | nonsynonymous | 1 | 0 |
| DKK3     | chr11 | 11990022/C//G   | nonsynonymous | 1 | 0 |
| IGSF22   | chr11 | 18738367/G//A   | nonsynonymous | 1 | 0 |
| ANO3     | chr11 | 26353806/G//T   | synonymous    | 1 | 0 |
| TRAF6    | chr11 | 36522977/A//G   | nonsynonymous | 1 | 0 |
| MS4A4A   | chr11 | 60064720/G//T   | nonsynonymous | 1 | 0 |
| MAML2    | chr11 | 95712793/A//G   | synonymous    | 1 | 0 |
| APOA1-AS | chr11 | 116706953/C//T  | synonymous    | 1 | 0 |
| SC5D     | chr11 | 121177145/A//G  | nonsynonymous | 1 | 0 |
| EPS8     | chr12 | 15822733/C//A   | synonymous    | 1 | 0 |
| KRT76    | chr12 | 53164871/G//T   | nonsynonymous | 1 | 0 |
| MMP19    | chr12 | 56233528/G//A   | synonymous    | 1 | 0 |
| TSC22D1  | chr13 | 45147536/A//T   | nonsynonymous | 1 | 0 |
| MYCBP2   | chr13 | 77817263/G//T   | nonsynonymous | 1 | 0 |
| OR4K13   | chr14 | 20502600/G//A   | synonymous    | 1 | 0 |
| VRK1     | chr14 | 97322495/A//G   | nonsynonymous | 1 | 0 |
| DIO3     | chr14 | 102028060/G//T  | nonsynonymous | 1 | 0 |
| ATP10A   | chr15 | 25932898/G//A   | synonymous    | 1 | 0 |
| GJD2     | chr15 | 35044867/C//A   | nonsynonymous | 1 | 0 |
| ITGA11   | chr15 | 68695322/G//T   | synonymous    | 1 | 0 |
| PRMT7    | chr16 | 68380124/C//G   | nonsynonymous | 1 | 0 |
| SERPINF1 | chr17 | 1680813/G//T    | synonymous    | 1 | 0 |
| MYH2     | chr17 | 10432652/C//A   | nonsynonymous | 1 | 0 |
| TANC2    | chr17 | 61345101/C//A   | synonymous    | 1 | 0 |
| AQP4     | chr18 | 24442424/T//G   | nonsynonymous | 1 | 0 |
| TSHZ1    | chr18 | 72999886/G//T   | nonsynonymous | 1 | 0 |
| EEF2     | chr19 | 3977959/T//C    | nonsynonymous | 1 | 0 |
| PTPRS    | chr19 | 5245831/G//A    | nonsynonymous | 1 | 0 |
| CAMSAP3  | chr19 | 7676670/A//G    | nonsynonymous | 1 | 0 |
|          | chr19 | 7831118/C//G    | synonymous    | 1 | 0 |
| ADGRL1   | chr19 | 14288480/C//A   | synonymous    | 1 | 0 |
| GDF15    | chr19 | 18499616/C//T   | synonymous    | 1 | 0 |
| ZNF429   | chr19 | 21720038/G//A   | nonsynonymous | 1 | 0 |
| SIRT2    | chr19 | 39384156/G//A   | nonsynonymous | 1 | 0 |
| RPS16    | chr19 | 39924385/A//C   | nonsynonymous | 1 | 0 |
| OPA3     | chr19 | 46056968/T//A   | nonsynonymous | 1 | 0 |
| CALM3    | chr19 | 47112409/G//C   | nonsynonymous | 1 | 0 |
| ZNF415   | chr19 | 53612963/G//A   | nonsynonymous | 1 | 0 |
| NLRP8    | chr19 | 56466692/C//A   | nonsynonymous | 1 | 0 |
| MTG2     | chr20 | 60770908/A//T   | synonymous    | 1 | 0 |
| ADAMTS1  | chr21 | 28212733/C//T   | synonymous    | 1 | 0 |
| TIAM1    | chr21 | 32624382/G//A   | nonsynonymous | 1 | 0 |
| DSCAM    | chr21 | 41719740/G//T   | nonsynonymous | 1 | 0 |
| SF3A1    | chr22 | 30735013/T//C   | nonsynonymous | 1 | 0 |
| RASD2    | chr22 | 35948196/ACC//A | synonymous    | 1 | 0 |
| HUWE1    | chrX  | 53588796/A//G   | synonymous    | 1 | 0 |
| KCNJ9    | chr1  | 160053797/A//C  | synonymous    | 0 | 1 |
| TXNDC9   | chr2  | 99938574/T//C   | nonsynonymous | 0 | 1 |
| FAIM     | chr3  | 138341028/A//G  | nonsynonymous | 0 | 1 |
| LRIT3    | chr4  | 110791778/A//G  | nonsynonymous | 0 | 1 |
| ADAMTS16 | chr5  | 5303867/C//T    | synonymous    | 0 | 1 |
| TRIM41   | chr5  | 180651221/G//A  | synonymous    | 0 | 1 |
| SCIN     | chr7  | 12680135/T//A   | nonsynonymous | 0 | 1 |

|           |       |                  |               |   |   |
|-----------|-------|------------------|---------------|---|---|
| ZNF273    | chr7  | 64388845/G//A    | nonsynonymous | 0 | 1 |
| ZNF804B   | chr7  | 88847471/T//G    | nonsynonymous | 0 | 1 |
| RAD21     | chr8  | 117869521/C//A   | nonsynonymous | 0 | 1 |
| SLA       | chr8  | 134114789/C//A   | synonymous    | 0 | 1 |
| TOR4A     | chr9  | 140173611/T//C   | nonsynonymous | 0 | 1 |
| ADRB1     | chr10 | 115804459/T//C   | nonsynonymous | 0 | 1 |
| CCDC86    | chr11 | 60609552/C//A    | synonymous    | 0 | 1 |
| RAB39A    | chr11 | 107832683/G//A   | nonsynonymous | 0 | 1 |
| CACNA1C   | chr12 | 2783786/C//G     | nonsynonymous | 0 | 1 |
| TM9SF2    | chr13 | 100214940/T//G   | synonymous    | 0 | 1 |
| CYFIP1    | chr15 | 22999526/C//T    | nonsynonymous | 0 | 1 |
| ASPHD1    | chr16 | 29912823/A//G    | synonymous    | 0 | 1 |
| MT4       | chr16 | 56601692/A//G    | nonsynonymous | 0 | 1 |
| FANCA     | chr16 | 89857913/G//A    | synonymous    | 0 | 1 |
| CENPV     | chr17 | 16253298/T//C    | synonymous    | 0 | 1 |
| KRTAP1-3  | chr17 | 39190640/C//A    | nonsynonymous | 0 | 1 |
| KRTAP4-11 | chr17 | 39274364/T//G    | nonsynonymous | 0 | 1 |
| USHBP1    | chr19 | 17370450/C//T    | nonsynonymous | 0 | 1 |
| PPP2R1A   | chr19 | 52716213/G//A    | synonymous    | 0 | 1 |
| CST8      | chr20 | 23473648/C//A    | nonsynonymous | 0 | 1 |
| BRWD1     | chr21 | 40641853/C//T    | nonsynonymous | 0 | 1 |
| TTC28     | chr22 | 28378314/G//A    | synonymous    | 0 | 1 |
| IRS4      | chrX  | 107977199/G//T   | nonsynonymous | 0 | 1 |
| ACVR2A    | chr2  | 148672879/G//A   | synonymous    | 0 | 1 |
| JMY       | chr5  | 78610494/C//T    | nonsynonymous | 0 | 1 |
|           | chr5  | 148897408/T//G   | synonymous    | 0 | 1 |
| SYNCRIP   | chr6  | 86325067/T//G    | nonsynonymous | 0 | 1 |
| ELN       | chr7  | 73466304/G//A    | nonsynonymous | 0 | 1 |
| CPQ       | chr8  | 98155433/T//C    | synonymous    | 0 | 1 |
| COL27A1   | chr9  | 117052349/A//G   | synonymous    | 0 | 1 |
| COL13A1   | chr10 | 71640267/C//G    | synonymous    | 0 | 1 |
| DYNC2H1   | chr11 | 103049827/A//G   | nonsynonymous | 0 | 1 |
| DYNC2H1   | chr11 | 103049842/T//C   | nonsynonymous | 0 | 1 |
| GLT1D1    | chr12 | 129383793/T//G   | synonymous    | 0 | 1 |
| CTDSPL2   | chr15 | 44783186/C//T    | nonsynonymous | 0 | 1 |
| SLC12A4   | chr16 | 67979865/C//G    | nonsynonymous | 0 | 1 |
| ALDH3A1   | chr17 | 19646652/T//G    | nonsynonymous | 0 | 1 |
| C18orf8   | chr18 | 21111671/T//G    | synonymous    | 0 | 1 |
| PAXBP1    | chr21 | 34110601/G//A    | synonymous    | 0 | 1 |
| CABIN1    | chr22 | 24515573/G//A    | nonsynonymous | 0 | 1 |
| RBM10     | chrX  | 47038751/TG//T   | nonsynonymous | 0 | 1 |
| TENM1     | chrX  | 124029835/T//C   | nonsynonymous | 0 | 1 |
| ALDH9A1   | chr1  | 165664638/T//C   | synonymous    | 1 | 0 |
| CFHR1     | chr1  | 196797356/C//A   | nonsynonymous | 1 | 0 |
| ZP4       | chr1  | 238048784/G//C   | nonsynonymous | 1 | 0 |
| STARD7    | chr2  | 96853022/T//G    | nonsynonymous | 1 | 0 |
| TTN       | chr2  | 179604692/T//G   | nonsynonymous | 1 | 0 |
| TRIP12    | chr2  | 230683204/T//A   | nonsynonymous | 1 | 0 |
| TRANK1    | chr3  | 36873129/G//A    | nonsynonymous | 1 | 0 |
| ABHD14A   | chr3  | 52015014/T//C    | nonsynonymous | 1 | 0 |
| WNT5A     | chr3  | 55508594/C//T    | nonsynonymous | 1 | 0 |
| APC       | chr5  | 112175266/AGT//A | nonsynonymous | 1 | 0 |
| PCDHGB6   | chr5  | 140789709/G//A   | nonsynonymous | 1 | 0 |
| HIST1H2BJ | chr6  | 27100381/T//A    | nonsynonymous | 1 | 0 |
| MOG       | chr6  | 29638498/C//T    | nonsynonymous | 1 | 0 |
| TUBB      | chr6  | 30691933/T//C    | nonsynonymous | 1 | 0 |
| GPR63     | chr6  | 97246998/C//T    | nonsynonymous | 1 | 0 |
| TIAM2     | chr6  | 155485673/G//A   | nonsynonymous | 1 | 0 |
| T         | chr6  | 166580128/G//A   | synonymous    | 1 | 0 |
| SLC20A2   | chr8  | 42287753/G//A    | nonsynonymous | 1 | 0 |
| FRMPD1    | chr9  | 37737218/G//A    | synonymous    | 1 | 0 |
| CIZ1      | chr9  | 130932334/C//T   | nonsynonymous | 1 | 0 |
| EHMT1     | chr9  | 140605438/AG//A  | nonsynonymous | 1 | 0 |
| EPS8L2    | chr11 | 724785/C//T      | nonsynonymous | 1 | 0 |
| DCDC1     | chr11 | 31327282/C//T    | nonsynonymous | 1 | 0 |
| CAPN1     | chr11 | 64951014/C//T    | nonsynonymous | 1 | 0 |
| NLRX1     | chr11 | 119050423/C//T   | nonsynonymous | 1 | 0 |
| ITPR2     | chr12 | 26731707/G//A    | synonymous    | 1 | 0 |
| OR7D2     | chr19 | 9297229/G//A     | nonsynonymous | 1 | 0 |
| LDLR      | chr19 | 11227644/G//T    | synonymous    | 1 | 0 |

|              |       |                |               |   |   |
|--------------|-------|----------------|---------------|---|---|
| ZNF709       | chr19 | 12575060/G//A  | nonsynonymous | 1 | 0 |
| PSG3         | chr19 | 43228185/G//T  | synonymous    | 1 | 0 |
| MYPOP        | chr19 | 46393982/G//C  | nonsynonymous | 1 | 0 |
| RFPL4A       | chr19 | 56273285/A//G  | nonsynonymous | 1 | 0 |
| CHMP4B       | chr20 | 32399313/T//C  | synonymous    | 1 | 0 |
| MICALL1      | chr22 | 38327935/C//T  | nonsynonymous | 1 | 0 |
| NLGN4X       | chrX  | 5811586/T//C   | nonsynonymous | 1 | 0 |
| DMD          | chrX  | 31140005/C//T  | synonymous    | 1 | 0 |
| PASD1        | chrX  | 150817153/T//C | synonymous    | 1 | 0 |
| TNFRSF14     | chr1  | 2492099/C//T   | nonsynonymous | 0 | 1 |
| FAM229A      | chr1  | 32826930/T//C  | synonymous    | 0 | 1 |
| MKNK1        | chr1  | 47048932/C//T  | nonsynonymous | 0 | 1 |
| ZFYVE9       | chr1  | 52704972/C//A  | nonsynonymous | 0 | 1 |
| ARHGAP29     | chr1  | 94639604/C//T  | nonsynonymous | 0 | 1 |
| KCND3        | chr1  | 112524533/G//A | synonymous    | 0 | 1 |
| ATP1A1       | chr1  | 116932947/G//A | nonsynonymous | 0 | 1 |
| HORMAD1      | chr1  | 150672638/T//A | nonsynonymous | 0 | 1 |
| TCHH         | chr1  | 152081608/A//C | nonsynonymous | 0 | 1 |
| ATP8B2       | chr1  | 154316887/C//T | synonymous    | 0 | 1 |
| SMG7         | chr1  | 183520021/G//C | nonsynonymous | 0 | 1 |
| RGL1         | chr1  | 183876153/C//G | nonsynonymous | 0 | 1 |
| KMO          | chr1  | 241724031/A//C | nonsynonymous | 0 | 1 |
| IL1R1        | chr2  | 102792849/G//A | nonsynonymous | 0 | 1 |
| ST6GAL2      | chr2  | 107459634/G//A | nonsynonymous | 0 | 1 |
| ZEB2         | chr2  | 145157570/A//G | nonsynonymous | 0 | 1 |
| ATF2         | chr2  | 175986250/G//T | nonsynonymous | 0 | 1 |
| UBE2E3       | chr2  | 181927645/G//A | synonymous    | 0 | 1 |
| TM4SF20      | chr2  | 228228351/T//G | synonymous    | 0 | 1 |
| SCN10A       | chr3  | 38760228/G//A  | synonymous    | 0 | 1 |
| TRAK1        | chr3  | 42265286/C//T  | synonymous    | 0 | 1 |
| FRG2C        | chr3  | 75714707/A//G  | nonsynonymous | 0 | 1 |
| ROBO1        | chr3  | 78688903/T//C  | nonsynonymous | 0 | 1 |
| OR5K4        | chr3  | 98073186/A//G  | synonymous    | 0 | 1 |
| MORC1        | chr3  | 108751608/G//A | synonymous    | 0 | 1 |
| KY           | chr3  | 134329177/G//A | synonymous    | 0 | 1 |
| JAKMIP1      | chr4  | 6082016/C//T   | synonymous    | 0 | 1 |
| LG12         | chr4  | 25032164/C//T  | nonsynonymous | 0 | 1 |
| ADGRL3       | chr4  | 62599246/A//G  | nonsynonymous | 0 | 1 |
| WDFY3        | chr4  | 85657456/C//T  | nonsynonymous | 0 | 1 |
| ADH4         | chr4  | 100047803/G//A | nonsynonymous | 0 | 1 |
| PAPSS1       | chr4  | 108622350/C//T | nonsynonymous | 0 | 1 |
| ABCE1        | chr4  | 146044699/G//A | synonymous    | 0 | 1 |
| LOC100130744 | chr5  | 14712970/G//A  | synonymous    | 0 | 1 |
| TENM2        | chr5  | 167674683/C//T | nonsynonymous | 0 | 1 |
| GPX5         | chr6  | 28501748/C//T  | nonsynonymous | 0 | 1 |
| SYNGAP1      | chr6  | 33410682/C//T  | nonsynonymous | 0 | 1 |
| COL12A1      | chr6  | 75841698/G//A  | synonymous    | 0 | 1 |
| SNAP91       | chr6  | 84265899/C//T  | synonymous    | 0 | 1 |
| CEP162       | chr6  | 84879151/C//T  | nonsynonymous | 0 | 1 |
| INTS1        | chr7  | 1538761/G//A   | synonymous    | 0 | 1 |
| DNAH11       | chr7  | 21600793/G//C  | synonymous    | 0 | 1 |
| PDE1C        | chr7  | 31904610/G//A  | synonymous    | 0 | 1 |
| PSMA2        | chr7  | 42964371/G//C  | nonsynonymous | 0 | 1 |
| ZNF716       | chr7  | 57529806/A//G  | synonymous    | 0 | 1 |
| TMEM120A     | chr7  | 75616443/A//T  | synonymous    | 0 | 1 |
| SMO          | chr7  | 128850838/G//C | nonsynonymous | 0 | 1 |
| XKR4         | chr8  | 56436305/C//T  | nonsynonymous | 0 | 1 |
| ZFH4         | chr8  | 77768162/C//T  | nonsynonymous | 0 | 1 |
| CPSF1        | chr8  | 145626174/C//T | nonsynonymous | 0 | 1 |
| FOCAD        | chr9  | 20885192/G//A  | nonsynonymous | 0 | 1 |
| PALM2-AKAP2  | chr9  | 112900761/C//A | nonsynonymous | 0 | 1 |
| STOM         | chr9  | 124115534/G//T | nonsynonymous | 0 | 1 |
| RPL35        | chr9  | 127623798/T//C | nonsynonymous | 0 | 1 |
| SETX         | chr9  | 135202959/A//G | synonymous    | 0 | 1 |
| RALGDS       | chr9  | 135977392/G//C | nonsynonymous | 0 | 1 |
| LARP4B       | chr10 | 910123/C//G    | nonsynonymous | 0 | 1 |
| ANKRD30A     | chr10 | 37430724/A//G  | nonsynonymous | 0 | 1 |
| CH17-360D5.1 | chr10 | 47087611/G//A  | synonymous    | 0 | 1 |
| ZMIZ1        | chr10 | 81060645/C//T  | synonymous    | 0 | 1 |
| FRA10AC1     | chr10 | 95443831/T//G  | nonsynonymous | 0 | 1 |

|          |       |                       |               |   |   |
|----------|-------|-----------------------|---------------|---|---|
| GPAM     | chr10 | 113928224/C//T        | nonsynonymous | 0 | 1 |
| ZRANB1   | chr10 | 126631316/C//G        | nonsynonymous | 0 | 1 |
|          | chr10 | 126716179/C//A        | synonymous    | 0 | 1 |
| PIDD1    | chr11 | 802350/C//T           | nonsynonymous | 0 | 1 |
| SBF2     | chr11 | 9810655/C//G          | nonsynonymous | 0 | 1 |
| TSPAN9   | chr12 | 3390479/C//T          | nonsynonymous | 0 | 1 |
| SLCO1B7  | chr12 | 21174450/T//G         | nonsynonymous | 0 | 1 |
| PDZRN4   | chr12 | 41966268/C//T         | nonsynonymous | 0 | 1 |
| SLC4A8   | chr12 | 51856203/C//G         | nonsynonymous | 0 | 1 |
| BEST3    | chr12 | 70049581/G//A         | synonymous    | 0 | 1 |
| ZFC3H1   | chr12 | 72025951/G//C         | nonsynonymous | 0 | 1 |
| UTP20    | chr12 | 101750706/T//G        | nonsynonymous | 0 | 1 |
| POSTN    | chr13 | 38162117/G//A         | nonsynonymous | 0 | 1 |
| LRFN5    | chr14 | 42357120/C//T         | nonsynonymous | 0 | 1 |
| ESR2     | chr14 | 64727364/G//A         | nonsynonymous | 0 | 1 |
| BTBD6    | chr14 | 105716419/CTAGAGGA//C | nonsynonymous | 0 | 1 |
| BTBD6    | chr14 | 105716429/TTGCCAAC//T | nonsynonymous | 0 | 1 |
| OR4N4    | chr15 | 22383341/G//A         | nonsynonymous | 0 | 1 |
| RYR3     | chr15 | 34094075/C//G         | nonsynonymous | 0 | 1 |
| UNC13C   | chr15 | 54786890/G//A         | nonsynonymous | 0 | 1 |
| NMB      | chr15 | 85200529/C//T         | nonsynonymous | 0 | 1 |
| MYH11    | chr16 | 15851692/C//T         | nonsynonymous | 0 | 1 |
| ERN2     | chr16 | 23724460/G//A         | nonsynonymous | 0 | 1 |
| SEZ6L2   | chr16 | 29891281/G//A         | nonsynonymous | 0 | 1 |
| ADAMTS18 | chr16 | 77359805/G//A         | nonsynonymous | 0 | 1 |
| PRPF8    | chr17 | 1580469/G//C          | synonymous    | 0 | 1 |
| ABCA9    | chr17 | 66980313/C//T         | synonymous    | 0 | 1 |
| SLC39A11 | chr17 | 70644965/G//A         | synonymous    | 0 | 1 |
| MTCL1    | chr18 | 8784582/C//T          | nonsynonymous | 0 | 1 |
| MUC16    | chr19 | 9074748/T//C          | nonsynonymous | 0 | 1 |
| CYP4F8   | chr19 | 15734038/C//T         | synonymous    | 0 | 1 |
| HAPLN4   | chr19 | 19368878/G//A         | synonymous    | 0 | 1 |
| ZNF208   | chr19 | 22156279/A//G         | synonymous    | 0 | 1 |
| NUCB1    | chr19 | 49409095/G//A         | nonsynonymous | 0 | 1 |
| SIGLEC7  | chr19 | 51645694/G//A         | nonsynonymous | 0 | 1 |
| KIR3DL1  | chr19 | 55333096/T//C         | synonymous    | 0 | 1 |
|          | chr19 | 57742423/C//T         | synonymous    | 0 | 1 |
| CENPB    | chr20 | 3765547/G//A          | synonymous    | 0 | 1 |
| CST8     | chr20 | 23473638/G//A         | nonsynonymous | 0 | 1 |
| OGFR     | chr20 | 61440970/C//T         | nonsynonymous | 0 | 1 |
| KCNQ2    | chr20 | 62046388/G//A         | nonsynonymous | 0 | 1 |
| KRTAP7-1 | chr21 | 32201924/G//C         | nonsynonymous | 0 | 1 |
| URB1     | chr21 | 33735517/G//A         | nonsynonymous | 0 | 1 |
| UBASH3A  | chr21 | 43833258/C//T         | synonymous    | 0 | 1 |
| COL6A1   | chr21 | 47406935/C//T         | synonymous    | 0 | 1 |
| COL6A1   | chr21 | 47421199/G//A         | nonsynonymous | 0 | 1 |
| RGL4     | chr22 | 24034602/G//C         | nonsynonymous | 0 | 1 |
| APOBEC3F | chr22 | 39448694/C//T         | synonymous    | 0 | 1 |
| WNK3     | chrX  | 54360023/C//A         | nonsynonymous | 0 | 1 |
| FGD1     | chrX  | 54475683/G//A         | nonsynonymous | 0 | 1 |
| MAMLD1   | chrX  | 149638791/G//T        | nonsynonymous | 0 | 1 |
| CCDC27   | chr1  | 3669010/A//C          | synonymous    | 1 | 0 |
| ZBTB48   | chr1  | 6640743/A//T          | nonsynonymous | 1 | 0 |
| KIF17    | chr1  | 21036260/C//A         | nonsynonymous | 1 | 0 |
| SLC9A1   | chr1  | 27428988/C//T         | nonsynonymous | 1 | 0 |
| EPB41    | chr1  | 29314409/G//C         | nonsynonymous | 1 | 0 |
| EPHA10   | chr1  | 38227621/G//T         | nonsynonymous | 1 | 0 |
| EXO5     | chr1  | 40980323/A//C         | nonsynonymous | 1 | 0 |
| KIF2C    | chr1  | 45213331/A//T         | nonsynonymous | 1 | 0 |
| GLIS1    | chr1  | 54060606/G//A         | synonymous    | 1 | 0 |
| C8A      | chr1  | 57383351/T//C         | nonsynonymous | 1 | 0 |
| CLCA2    | chr1  | 86894233/G//C         | nonsynonymous | 1 | 0 |
| STXBP3   | chr1  | 109336276/A//G        | synonymous    | 1 | 0 |
| DCST1    | chr1  | 155013975/A//T        | nonsynonymous | 1 | 0 |
| OR10K1   | chr1  | 158435420/G//T        | synonymous    | 1 | 0 |
| SLAMF8   | chr1  | 159799930/G//T        | nonsynonymous | 1 | 0 |
| SLAMF1   | chr1  | 160607098/G//T        | nonsynonymous | 1 | 0 |
| TNR      | chr1  | 175375559/G//A        | synonymous    | 1 | 0 |
| RFWD2    | chr1  | 176085819/T//A        | nonsynonymous | 1 | 0 |
| RGSL1    | chr1  | 182517879/C//G        | nonsynonymous | 1 | 0 |

|          |      |                |               |   |   |
|----------|------|----------------|---------------|---|---|
| HMCN1    | chr1 | 186072734/C//A | synonymous    | 1 | 0 |
| TMEM9    | chr1 | 201104861/T//G | nonsynonymous | 1 | 0 |
| PPFIA4   | chr1 | 203033055/G//T | nonsynonymous | 1 | 0 |
| HHIPL2   | chr1 | 222705401/C//A | nonsynonymous | 1 | 0 |
| OBSCN    | chr1 | 228401914/G//T | nonsynonymous | 1 | 0 |
| OBSCN    | chr1 | 228506637/C//T | synonymous    | 1 | 0 |
| RYR2     | chr1 | 237765331/C//A | nonsynonymous | 1 | 0 |
| ZP4      | chr1 | 238050862/C//T | nonsynonymous | 1 | 0 |
| OR2T12   | chr1 | 248458084/G//C | nonsynonymous | 1 | 0 |
| OR2T6    | chr1 | 248551360/G//T | nonsynonymous | 1 | 0 |
| OR2G6    | chr1 | 248685323/G//T | nonsynonymous | 1 | 0 |
| NBAS     | chr2 | 15555788/T//C  | nonsynonymous | 1 | 0 |
| PFN4     | chr2 | 24345326/T//C  | nonsynonymous | 1 | 0 |
| ITSN2    | chr2 | 24533419/T//C  | synonymous    | 1 | 0 |
| DNMT3A   | chr2 | 25463523/C//A  | nonsynonymous | 1 | 0 |
| DNMT3A   | chr2 | 25466857/C//G  | synonymous    | 1 | 0 |
| C2orf73  | chr2 | 54570921/G//A  | nonsynonymous | 1 | 0 |
| EML6     | chr2 | 55077234/T//C  | synonymous    | 1 | 0 |
| EML6     | chr2 | 55155882/A//C  | nonsynonymous | 1 | 0 |
| REG1B    | chr2 | 79313551/A//C  | nonsynonymous | 1 | 0 |
| AFF3     | chr2 | 100209956/C//A | nonsynonymous | 1 | 0 |
| CFAP221  | chr2 | 120413990/G//T | nonsynonymous | 1 | 0 |
| GLI2     | chr2 | 121747822/G//A | nonsynonymous | 1 | 0 |
| CNTNAP5  | chr2 | 125521556/C//A | nonsynonymous | 1 | 0 |
| CNTNAP5  | chr2 | 125671823/G//T | nonsynonymous | 1 | 0 |
| KYNU     | chr2 | 143712411/G//T | nonsynonymous | 1 | 0 |
| RIF1     | chr2 | 152321666/G//C | nonsynonymous | 1 | 0 |
| NEB      | chr2 | 152534686/C//A | nonsynonymous | 1 | 0 |
| CCDC173  | chr2 | 170507014/C//G | nonsynonymous | 1 | 0 |
| TTN      | chr2 | 179485462/G//A | nonsynonymous | 1 | 0 |
| HECW2    | chr2 | 197298155/G//C | synonymous    | 1 | 0 |
| FN1      | chr2 | 216286816/C//T | nonsynonymous | 1 | 0 |
| DES      | chr2 | 220290413/G//T | nonsynonymous | 1 | 0 |
| SPHKAP   | chr2 | 228860413/G//T | synonymous    | 1 | 0 |
| SP100    | chr2 | 231311547/A//T | nonsynonymous | 1 | 0 |
| KLHL30   | chr2 | 239057695/T//C | nonsynonymous | 1 | 0 |
| GRM7     | chr3 | 6903538/G//C   | nonsynonymous | 1 | 0 |
| MAPKAPK3 | chr3 | 50681855/T//C  | nonsynonymous | 1 | 0 |
| TRMT10C  | chr3 | 101284616/C//A | nonsynonymous | 1 | 0 |
| TIGIT    | chr3 | 114012958/C//T | nonsynonymous | 1 | 0 |
| SEMA5B   | chr3 | 122647469/C//A | synonymous    | 1 | 0 |
| KALRN    | chr3 | 124418737/C//T | nonsynonymous | 1 | 0 |
| CCNL1    | chr3 | 156867178/C//T | synonymous    | 1 | 0 |
| IFT80    | chr3 | 160095215/T//C | synonymous    | 1 | 0 |
| MECOM    | chr3 | 168840416/C//G | nonsynonymous | 1 | 0 |
| NCEH1    | chr3 | 172353761/A//G | nonsynonymous | 1 | 0 |
| NCEH1    | chr3 | 172353767/C//G | nonsynonymous | 1 | 0 |
| ABCC5    | chr3 | 183667822/C//A | synonymous    | 1 | 0 |
| DGKG     | chr3 | 185969560/G//T | nonsynonymous | 1 | 0 |
| ZNF141   | chr4 | 366896/G//C    | nonsynonymous | 1 | 0 |
| NKX3-2   | chr4 | 13544069/CG//C | nonsynonymous | 1 | 0 |
| GBA3     | chr4 | 22749488/C//T  | nonsynonymous | 1 | 0 |
| BEND4    | chr4 | 42119656/C//T  | nonsynonymous | 1 | 0 |
| GABRB1   | chr4 | 47163420/A//G  | nonsynonymous | 1 | 0 |
| PCDH10   | chr4 | 134111320/T//A | synonymous    | 1 | 0 |
| RAPGEF2  | chr4 | 160263098/A//G | nonsynonymous | 1 | 0 |
|          | chr4 | 186559228/C//A | synonymous    | 1 | 0 |
| ADAMTS16 | chr5 | 5146343/C//A   | synonymous    | 1 | 0 |
| CDH9     | chr5 | 26889971/C//T  | nonsynonymous | 1 | 0 |
| C9       | chr5 | 39306822/A//T  | nonsynonymous | 1 | 0 |
| NNT      | chr5 | 43704430/C//T  | nonsynonymous | 1 | 0 |
| GPBP1    | chr5 | 56527134/G//A  | nonsynonymous | 1 | 0 |
| AP3B1    | chr5 | 77396788/T//C  | nonsynonymous | 1 | 0 |
| PCDHA6   | chr5 | 140209902/C//T | synonymous    | 1 | 0 |
| PCDHB12  | chr5 | 140590526/G//T | nonsynonymous | 1 | 0 |
| PCDHB15  | chr5 | 140626806/G//C | nonsynonymous | 1 | 0 |
| GRIA1    | chr5 | 153078550/G//C | nonsynonymous | 1 | 0 |
| FLT4     | chr5 | 180056404/G//T | synonymous    | 1 | 0 |
| FOXQ1    | chr6 | 1312836/G//A   | synonymous    | 1 | 0 |
| POM121L2 | chr6 | 27278964/T//A  | nonsynonymous | 1 | 0 |

|              |       |                |               |   |   |
|--------------|-------|----------------|---------------|---|---|
| TRIM39-RPP21 | chr6  | 30314265/C//T  | nonsynonymous | 1 | 0 |
| HLA-B        | chr6  | 31324586/C//T  | synonymous    | 1 | 0 |
| TBC1D22B     | chr6  | 37259112/G//A  | nonsynonymous | 1 | 0 |
| PRPH2        | chr6  | 42689487/C//T  | synonymous    | 1 | 0 |
| DEFB112      | chr6  | 50011494/T//A  | nonsynonymous | 1 | 0 |
| COL21A1      | chr6  | 56035861/C//A  | nonsynonymous | 1 | 0 |
| COL12A1      | chr6  | 75831029/C//A  | nonsynonymous | 1 | 0 |
| TBX18        | chr6  | 85454021/C//T  | nonsynonymous | 1 | 0 |
| ZNF292       | chr6  | 87969667/G//T  | nonsynonymous | 1 | 0 |
| POU3F2       | chr6  | 99283908/C//T  | nonsynonymous | 1 | 0 |
| TRDN         | chr6  | 123824904/C//A | nonsynonymous | 1 | 0 |
| HBS1L        | chr6  | 135315006/T//C | nonsynonymous | 1 | 0 |
| SYNE1        | chr6  | 152469233/T//C | nonsynonymous | 1 | 0 |
| TAGAP        | chr6  | 159457357/G//T | synonymous    | 1 | 0 |
| PARK2        | chr6  | 162864343/T//C | nonsynonymous | 1 | 0 |
| WDR27        | chr6  | 170068258/T//C | nonsynonymous | 1 | 0 |
| CARD11       | chr7  | 2976663/C//T   | synonymous    | 1 | 0 |
| SOSTDC1      | chr7  | 16505400/G//C  | synonymous    | 1 | 0 |
| GLI3         | chr7  | 42006210/C//A  | nonsynonymous | 1 | 0 |
| OGDH         | chr7  | 44735710/G//A  | synonymous    | 1 | 0 |
| TBRG4        | chr7  | 45148473/T//C  | nonsynonymous | 1 | 0 |
| CYP3A4       | chr7  | 99361483/T//A  | nonsynonymous | 1 | 0 |
| PILRB        | chr7  | 99957091/G//T  | nonsynonymous | 1 | 0 |
| TSC22D4      | chr7  | 100075364/G//T | nonsynonymous | 1 | 0 |
| CDHR3        | chr7  | 105636787/C//T | nonsynonymous | 1 | 0 |
| LAMB4        | chr7  | 107746318/T//C | nonsynonymous | 1 | 0 |
| ZNF277       | chr7  | 111981073/C//A | nonsynonymous | 1 | 0 |
| ASB15        | chr7  | 123269038/T//C | synonymous    | 1 | 0 |
| TRPV5        | chr7  | 142630456/T//G | nonsynonymous | 1 | 0 |
| C7orf33      | chr7  | 148312423/G//A | nonsynonymous | 1 | 0 |
| DPP6         | chr7  | 154564595/G//T | nonsynonymous | 1 | 0 |
| ZNF596       | chr8  | 192976/T//C    | synonymous    | 1 | 0 |
| PRAG1        | chr8  | 8185318/G//T   | nonsynonymous | 1 | 0 |
| WRN          | chr8  | 30916685/G//A  | nonsynonymous | 1 | 0 |
| NKX6-3       | chr8  | 41503937/C//A  | synonymous    | 1 | 0 |
| WWP1         | chr8  | 87447875/C//T  | nonsynonymous | 1 | 0 |
| LRRRC69      | chr8  | 92201837/G//A  | nonsynonymous | 1 | 0 |
| KIAA1429     | chr8  | 95521950/T//C  | nonsynonymous | 1 | 0 |
| DCSTAMP      | chr8  | 105361005/C//T | synonymous    | 1 | 0 |
| CSMD3        | chr8  | 113237030/G//C | synonymous    | 1 | 0 |
| ENPP2        | chr8  | 120569881/T//A | synonymous    | 1 | 0 |
| ARC          | chr8  | 143694723/G//T | nonsynonymous | 1 | 0 |
| MAF1         | chr8  | 145160556/C//T | synonymous    | 1 | 0 |
| IFNE         | chr9  | 21481352/A//G  | synonymous    | 1 | 0 |
| FRMPD1       | chr9  | 37708396/G//C  | nonsynonymous | 1 | 0 |
| PRUNE2       | chr9  | 79322543/C//A  | nonsynonymous | 1 | 0 |
| TLE1         | chr9  | 84300771/C//A  | nonsynonymous | 1 | 0 |
| SPIN1        | chr9  | 91077454/C//T  | nonsynonymous | 1 | 0 |
| HSD17B3      | chr9  | 99015139/C//T  | nonsynonymous | 1 | 0 |
| RABGAP1      | chr9  | 125860043/G//C | synonymous    | 1 | 0 |
| ZMYND19      | chr9  | 140481441/C//A | nonsynonymous | 1 | 0 |
| ARMC3        | chr10 | 23248029/A//G  | nonsynonymous | 1 | 0 |
| GPR158       | chr10 | 25888205/A//G  | synonymous    | 1 | 0 |
| PGBD3        | chr10 | 50723370/T//G  | synonymous    | 1 | 0 |
| JMJD1C       | chr10 | 64960406/C//A  | nonsynonymous | 1 | 0 |
| STOX1        | chr10 | 70652343/A//G  | nonsynonymous | 1 | 0 |
| MSS51        | chr10 | 75187453/C//T  | nonsynonymous | 1 | 0 |
| PPIF         | chr10 | 81112084/A//T  | nonsynonymous | 1 | 0 |
| NRG3         | chr10 | 83635804/C//A  | nonsynonymous | 1 | 0 |
| FGFBP3       | chr10 | 93668747/C//G  | synonymous    | 1 | 0 |
| CEP55        | chr10 | 95287948/A//G  | synonymous    | 1 | 0 |
| PDE6C        | chr10 | 95380670/T//C  | nonsynonymous | 1 | 0 |
| SORCS3       | chr10 | 106907418/C//A | nonsynonymous | 1 | 0 |
| ADAM12       | chr10 | 127797169/A//T | nonsynonymous | 1 | 0 |
| RASSF7       | chr11 | 562612/G//A    | nonsynonymous | 1 | 0 |
| PDDC1        | chr11 | 772447/C//T    | nonsynonymous | 1 | 0 |
| OR52K1       | chr11 | 4510574/G//T   | nonsynonymous | 1 | 0 |
| OR51G1       | chr11 | 4945085/G//T   | nonsynonymous | 1 | 0 |
| OR56A3       | chr11 | 5968608/C//A   | nonsynonymous | 1 | 0 |
| CCKBR        | chr11 | 6290998/G//A   | nonsynonymous | 1 | 0 |

|                |       |                |               |   |   |
|----------------|-------|----------------|---------------|---|---|
| TAF10          | chr11 | 6632128/G//T   | synonymous    | 1 | 0 |
| GAS2           | chr11 | 22759284/G//T  | nonsynonymous | 1 | 0 |
| KIF18A         | chr11 | 28090864/C//A  | nonsynonymous | 1 | 0 |
| CD82           | chr11 | 44636848/G//T  | synonymous    | 1 | 0 |
| PTPRJ          | chr11 | 48161299/C//A  | nonsynonymous | 1 | 0 |
| OR4A15         | chr11 | 55135859/G//T  | nonsynonymous | 1 | 0 |
| OR4S2          | chr11 | 55419186/G//A  | synonymous    | 1 | 0 |
| OR5D18         | chr11 | 55587408/A//T  | nonsynonymous | 1 | 0 |
| OR5AP2         | chr11 | 56409913/C//G  | nonsynonymous | 1 | 0 |
| OR5B17         | chr11 | 58126440/T//A  | nonsynonymous | 1 | 0 |
| PACS1          | chr11 | 65998332/G//C  | nonsynonymous | 1 | 0 |
| USP28          | chr11 | 113683190/C//A | nonsynonymous | 1 | 0 |
| CADM1          | chr11 | 115088653/C//T | synonymous    | 1 | 0 |
| DSCAML1        | chr11 | 117332320/G//T | synonymous    | 1 | 0 |
| KDM5A          | chr12 | 394646/C//A    | nonsynonymous | 1 | 0 |
| C12orf40       | chr12 | 40076470/T//C  | synonymous    | 1 | 0 |
| C12orf40       | chr12 | 40076606/G//T  | nonsynonymous | 1 | 0 |
| NELL2          | chr12 | 45108493/A//G  | synonymous    | 1 | 0 |
| KMT2D          | chr12 | 49439843/C//A  | synonymous    | 1 | 0 |
| NEUROD4        | chr12 | 55420319/G//T  | nonsynonymous | 1 | 0 |
| AGAP2          | chr12 | 58123542/G//A  | nonsynonymous | 1 | 0 |
| MON2           | chr12 | 62926222/G//T  | nonsynonymous | 1 | 0 |
| PTPRQ          | chr12 | 81062862/T//G  | nonsynonymous | 1 | 0 |
| WSCD2          | chr12 | 108604025/G//T | nonsynonymous | 1 | 0 |
| DDX54          | chr12 | 113603774/C//G | nonsynonymous | 1 | 0 |
| GCN1           | chr12 | 120582806/G//C | nonsynonymous | 1 | 0 |
| HNF1A          | chr12 | 121426784/C//A | synonymous    | 1 | 0 |
| P2RX7          | chr12 | 121593889/C//T | nonsynonymous | 1 | 0 |
| ANAPC5         | chr12 | 121746496/T//C | nonsynonymous | 1 | 0 |
| DNAH10         | chr12 | 124403382/T//C | synonymous    | 1 | 0 |
| RIMBP2         | chr12 | 130907084/G//T | nonsynonymous | 1 | 0 |
| POLE           | chr12 | 133202351/C//A | synonymous    | 1 | 0 |
| TUBA3C         | chr13 | 19751605/G//T  | nonsynonymous | 1 | 0 |
| CCDC169-SOHLH2 | chr13 | 36801502/C//A  | nonsynonymous | 1 | 0 |
| RB1            | chr13 | 48934254/G//T  | nonsynonymous | 1 | 0 |
| CCDC168        | chr13 | 103383558/T//C | nonsynonymous | 1 | 0 |
| CCDC168        | chr13 | 103384484/T//A | nonsynonymous | 1 | 0 |
| CCDC168        | chr13 | 103392414/C//A | nonsynonymous | 1 | 0 |
| KDELC1         | chr13 | 103445751/A//G | synonymous    | 1 | 0 |
| ATP11A         | chr13 | 113481091/G//T | nonsynonymous | 1 | 0 |
| TGM1           | chr14 | 24724726/G//C  | synonymous    | 1 | 0 |
| SOS2           | chr14 | 50585478/C//T  | nonsynonymous | 1 | 0 |
| DLGAP5         | chr14 | 55618520/A//T  | nonsynonymous | 1 | 0 |
| AREL1          | chr14 | 75139593/T//C  | nonsynonymous | 1 | 0 |
| POMT2          | chr14 | 77765851/G//A  | synonymous    | 1 | 0 |
| SERPINA10      | chr14 | 94754894/T//C  | nonsynonymous | 1 | 0 |
| SERPINA1       | chr14 | 94849205/G//A  | nonsynonymous | 1 | 0 |
| SETD3          | chr14 | 99865307/C//T  | synonymous    | 1 | 0 |
| BRF1           | chr14 | 105707631/C//T | nonsynonymous | 1 | 0 |
| TMEM121        | chr14 | 105995375/C//T | synonymous    | 1 | 0 |
| TJP1           | chr15 | 30008992/C//A  | nonsynonymous | 1 | 0 |
| MEIS2          | chr15 | 37388528/C//T  | nonsynonymous | 1 | 0 |
| SH3GL3         | chr15 | 84287216/T//C  | synonymous    | 1 | 0 |
| LINS1          | chr15 | 101120475/C//A | nonsynonymous | 1 | 0 |
| OR4F6          | chr15 | 102346650/A//T | nonsynonymous | 1 | 0 |
| ZNF205         | chr16 | 3169581/G//A   | nonsynonymous | 1 | 0 |
| GSPT1          | chr16 | 11981553/T//A  | synonymous    | 1 | 0 |
| ERI2           | chr16 | 20809677/G//A  | nonsynonymous | 1 | 0 |
| ITGAM          | chr16 | 31341637/C//T  | synonymous    | 1 | 0 |
| ZNF267         | chr16 | 31885291/G//T  | nonsynonymous | 1 | 0 |
| CHD9           | chr16 | 53262954/A//T  | nonsynonymous | 1 | 0 |
| SLC6A2         | chr16 | 55734137/G//C  | nonsynonymous | 1 | 0 |
| NDRG4          | chr16 | 58540830/C//G  | nonsynonymous | 1 | 0 |
| B3GNT9         | chr16 | 67184389/C//G  | synonymous    | 1 | 0 |
|                | chr16 | 75301866/C//A  | synonymous    | 1 | 0 |
| ZNF469         | chr16 | 88496192/G//C  | nonsynonymous | 1 | 0 |
| GAS8           | chr16 | 90103775/G//T  | nonsynonymous | 1 | 0 |
| SMYD4          | chr17 | 1703217/C//T   | nonsynonymous | 1 | 0 |
| CAMKK1         | chr17 | 3773092/G//A   | synonymous    | 1 | 0 |
| MYOCD          | chr17 | 12655975/C//A  | nonsynonymous | 1 | 0 |



|             |       |                   |               |   |   |
|-------------|-------|-------------------|---------------|---|---|
| PIPOX       | chr17 | 27370247/G//A     | nonsynonymous | 1 | 0 |
| TMEM132E    | chr17 | 32959848/G//T     | nonsynonymous | 1 | 0 |
| ACLY        | chr17 | 40039389/T//C     | nonsynonymous | 1 | 0 |
| ACLY        | chr17 | 40062806/C//A     | nonsynonymous | 1 | 0 |
| EFTUD2      | chr17 | 42960467/G//A     | synonymous    | 1 | 0 |
| ABI3        | chr17 | 47299492/C//T     | nonsynonymous | 1 | 0 |
| EFCAB3      | chr17 | 60484387/A//G     | nonsynonymous | 1 | 0 |
| CDH2        | chr18 | 25565717/G//T     | nonsynonymous | 1 | 0 |
| LOXHD1      | chr18 | 44069044/G//T     | synonymous    | 1 | 0 |
| TLE6        | chr19 | 2987052/C//G      | nonsynonymous | 1 | 0 |
| SH2D3A      | chr19 | 6754916/G//A      | nonsynonymous | 1 | 0 |
| ADAMTS10    | chr19 | 8666008/C//A      | nonsynonymous | 1 | 0 |
| OR1M1       | chr19 | 9204223/G//T      | nonsynonymous | 1 | 0 |
| ZNF317      | chr19 | 9271156/G//C      | nonsynonymous | 1 | 0 |
| S1PR2       | chr19 | 10335411/C//T     | synonymous    | 1 | 0 |
| HSH2D       | chr19 | 16268148/G//T     | nonsynonymous | 1 | 0 |
| IL12RB1     | chr19 | 18170743/T//A     | synonymous    | 1 | 0 |
| ZNF208      | chr19 | 22155945/G//T     | nonsynonymous | 1 | 0 |
| ZNF676      | chr19 | 22363018/C//A     | nonsynonymous | 1 | 0 |
| SPTBN4      | chr19 | 41029415/T//C     | synonymous    | 1 | 0 |
| LTBP4       | chr19 | 41111456/G//C     | synonymous    | 1 | 0 |
| ATP1A3      | chr19 | 42490091/G//T     | synonymous    | 1 | 0 |
| PSG9        | chr19 | 43766236/A//G     | nonsynonymous | 1 | 0 |
| QPCTL       | chr19 | 46196785/G//A     | nonsynonymous | 1 | 0 |
| PGLYRP1     | chr19 | 46522894/C//G     | nonsynonymous | 1 | 0 |
| PRKD2       | chr19 | 47195026/C//T     | synonymous    | 1 | 0 |
| NUP62       | chr19 | 50411560/A//G     | nonsynonymous | 1 | 0 |
| SIGLEC12    | chr19 | 52004887/A//T     | nonsynonymous | 1 | 0 |
| NLRP2       | chr19 | 55493625/G//A     | nonsynonymous | 1 | 0 |
| ZNF304      | chr19 | 57868842/A//G     | synonymous    | 1 | 0 |
| GPCPD1      | chr20 | 5559220/C//A      | nonsynonymous | 1 | 0 |
| PAK5        | chr20 | 9523252/C//A      | nonsynonymous | 1 | 0 |
| PDRG1       | chr20 | 30533666/A//C     | nonsynonymous | 1 | 0 |
| CDK5RAP1    | chr20 | 31960495/C//G     | nonsynonymous | 1 | 0 |
| TOX2        | chr20 | 42680053/G//A     | synonymous    | 1 | 0 |
| SALL4       | chr20 | 50407914/C//G     | nonsynonymous | 1 | 0 |
| CASS4       | chr20 | 55027898/C//A     | nonsynonymous | 1 | 0 |
| BIRC7       | chr20 | 61870843/C//A     | synonymous    | 1 | 0 |
| GRIK1       | chr21 | 31023576/G//T     | nonsynonymous | 1 | 0 |
| KRTAP12-1   | chr21 | 46101836/G//T     | nonsynonymous | 1 | 0 |
| SEC14L4     | chr22 | 30890909/T//C     | nonsynonymous | 1 | 0 |
| GAL3ST1     | chr22 | 30951143/T//A     | nonsynonymous | 1 | 0 |
| EFCAB6      | chr22 | 44028111/T//C     | synonymous    | 1 | 0 |
| DDX53       | chrX  | 23018643/A//G     | nonsynonymous | 1 | 0 |
| DDX53       | chrX  | 23018896/G//C     | nonsynonymous | 1 | 0 |
| AKAP4       | chrX  | 49955570/G//T     | synonymous    | 1 | 0 |
| ARMCX1      | chrX  | 100808746/C//T    | nonsynonymous | 1 | 0 |
| CT83        | chrX  | 115594047/G//A    | synonymous    | 1 | 0 |
| PER3        | chr1  | 7844810/G//A      | synonymous    | 0 | 1 |
| EFCAB14-AS1 | chr1  | 47152395/C//T     | synonymous    | 0 | 1 |
| WLS         | chr1  | 68614325/G//A     | nonsynonymous | 0 | 1 |
| NRAS        | chr1  | 115251176/A//T    | nonsynonymous | 0 | 1 |
| SV2A        | chr1  | 149884831/A//C    | nonsynonymous | 0 | 1 |
| RFX5        | chr1  | 151316199/G//A    | nonsynonymous | 0 | 1 |
| UAP1        | chr1  | 162560144/G//C    | nonsynonymous | 0 | 1 |
| FMO4        | chr1  | 171303720/C//A    | nonsynonymous | 0 | 1 |
| PAPPA2      | chr1  | 176564100/T//G    | nonsynonymous | 0 | 1 |
| C4BPA       | chr1  | 207314561/G//A    | nonsynonymous | 0 | 1 |
| SERTAD4     | chr1  | 210415483/A//G    | nonsynonymous | 0 | 1 |
| MARK1       | chr1  | 220835207/A//C    | nonsynonymous | 0 | 1 |
| MIA3        | chr1  | 222801754/A//T    | nonsynonymous | 0 | 1 |
| KCNK1       | chr1  | 233807097/A//C    | nonsynonymous | 0 | 1 |
| RBM34       | chr1  | 235323818/T//TTAC | synonymous    | 0 | 1 |
| FMN2        | chr1  | 240371827/C//T    | nonsynonymous | 0 | 1 |
| FAM228B     | chr2  | 24384470/A//G     | nonsynonymous | 0 | 1 |
| THUMP2      | chr2  | 39988537/A//C     | synonymous    | 0 | 1 |
| INSIG2      | chr2  | 118854299/C//T    | nonsynonymous | 0 | 1 |
| GPR17       | chr2  | 128409305/G//A    | synonymous    | 0 | 1 |
| LRP1B       | chr2  | 141356217/C//T    | nonsynonymous | 0 | 1 |
|             | chr2  | 152448582/A//G    | synonymous    | 0 | 1 |

|              |       |                        |               |   |   |
|--------------|-------|------------------------|---------------|---|---|
| FMNL2        | chr2  | 153486345/T//G         | nonsynonymous | 0 | 1 |
| TTN          | chr2  | 179498694/C//A         | nonsynonymous | 0 | 1 |
| ZNF804A      | chr2  | 185801900/A//C         | nonsynonymous | 0 | 1 |
| COQ10B       | chr2  | 198324736/G//A         | nonsynonymous | 0 | 1 |
| COL4A4       | chr2  | 227920748/G//A         | nonsynonymous | 0 | 1 |
| SH3BP4       | chr2  | 235962240/T//C         | nonsynonymous | 0 | 1 |
| WNT7A        | chr3  | 13896033/C//T          | nonsynonymous | 0 | 1 |
| LOC105377102 | chr3  | 57312115/T//G          | synonymous    | 0 | 1 |
| DRD3         | chr3  | 113849961/T//G         | synonymous    | 0 | 1 |
| AGTR1        | chr3  | 148458970/G//A         | nonsynonymous | 0 | 1 |
| SORCS2       | chr4  | 7684507/A//C           | nonsynonymous | 0 | 1 |
| GSTCD        | chr4  | 106650592/C//G         | synonymous    | 0 | 1 |
| SPOCK3       | chr4  | 167675888/C//G         | synonymous    | 0 | 1 |
| ADAMTS12     | chr5  | 33549457/A//T          | nonsynonymous | 0 | 1 |
| MRPS30       | chr5  | 44815406/G//A          | synonymous    | 0 | 1 |
| APC          | chr5  | 112128142/G//C         | nonsynonymous | 0 | 1 |
| UBE2D2       | chr5  | 138941330/C//T         | synonymous    | 0 | 1 |
| PPP2R2B      | chr5  | 146414779/A//G         | synonymous    | 0 | 1 |
| UNC5A        | chr5  | 176304256/C//T         | nonsynonymous | 0 | 1 |
|              | chr5  | 176917415/A//G         | synonymous    | 0 | 1 |
| GFPT2        | chr5  | 179762895/C//T         | synonymous    | 0 | 1 |
| MUC22        | chr6  | 30993987/C//G          | nonsynonymous | 0 | 1 |
| COL12A1      | chr6  | 75844552/T//C          | nonsynonymous | 0 | 1 |
| IBTK         | chr6  | 82930431/C//G          | nonsynonymous | 0 | 1 |
| NMBR         | chr6  | 142409490/C//T         | synonymous    | 0 | 1 |
| UTRN         | chr6  | 144837479/A//C         | nonsynonymous | 0 | 1 |
| AKAP12       | chr6  | 151672611/G//A         | nonsynonymous | 0 | 1 |
| LPA          | chr6  | 161011999/G//A         | nonsynonymous | 0 | 1 |
| DNAH11       | chr7  | 21599414/A//C          | synonymous    | 0 | 1 |
| ELMO1        | chr7  | 37298780/G//C          | synonymous    | 0 | 1 |
|              | chr7  | 44198722/C//T          | synonymous    | 0 | 1 |
| KIAA1324L    | chr7  | 86568191/G//T          | synonymous    | 0 | 1 |
| AGBL3        | chr7  | 134800342/C//A         | nonsynonymous | 0 | 1 |
| KMT2C        | chr7  | 151842372/C//T         | synonymous    | 0 | 1 |
| RAB11FIP1    | chr8  | 37730615/AAGGAAGAGG//A | nonsynonymous | 0 | 1 |
| CNBD1        | chr8  | 88365992/C//T          | synonymous    | 0 | 1 |
| RAD54B       | chr8  | 95470624/T//A          | nonsynonymous | 0 | 1 |
| HAS2         | chr8  | 122641070/C//T         | nonsynonymous | 0 | 1 |
| DMRT3        | chr9  | 990616/G//T            | nonsynonymous | 0 | 1 |
| MPDZ         | chr9  | 13113003/A//C          | synonymous    | 0 | 1 |
| MPDZ         | chr9  | 13222420/G//T          | nonsynonymous | 0 | 1 |
| SPATA31E1    | chr9  | 90500960/G//A          | nonsynonymous | 0 | 1 |
| CTNNAL1      | chr9  | 111741629/G//A         | nonsynonymous | 0 | 1 |
| ITIH2        | chr10 | 7774439/C//T           | nonsynonymous | 0 | 1 |
| ZNF33A       | chr10 | 38344460/G//C          | nonsynonymous | 0 | 1 |
| IPMK         | chr10 | 59997561/G//A          | nonsynonymous | 0 | 1 |
| HOGA1        | chr10 | 99361627/C//T          | synonymous    | 0 | 1 |
| HPSE2        | chr10 | 100481555/C//T         | nonsynonymous | 0 | 1 |
| BBIP1        | chr10 | 112660288/A//C         | synonymous    | 0 | 1 |
| EBF3         | chr10 | 131760427/T//G         | synonymous    | 0 | 1 |
| CYP2E1       | chr10 | 135345184/A//G         | nonsynonymous | 0 | 1 |
| CHRNA10      | chr11 | 3687482/G//A           | nonsynonymous | 0 | 1 |
| PC           | chr11 | 66616565/C//T          | synonymous    | 0 | 1 |
| DLG2         | chr11 | 83676428/T//G          | nonsynonymous | 0 | 1 |
| SESN3        | chr11 | 94910997/T//G          | nonsynonymous | 0 | 1 |
| DYNC2H1      | chr11 | 103027315/T//C         | nonsynonymous | 0 | 1 |
| DDI1         | chr11 | 103907477/C//T         | synonymous    | 0 | 1 |
| ALG9         | chr11 | 111731303/C//A         | nonsynonymous | 0 | 1 |
| OVCH1        | chr12 | 29649172/T//G          | nonsynonymous | 0 | 1 |
| PDZRN4       | chr12 | 41903633/T//C          | nonsynonymous | 0 | 1 |
| MRPS31       | chr13 | 41340972/G//T          | nonsynonymous | 0 | 1 |
| DNAJC3       | chr13 | 96438294/C//T          | nonsynonymous | 0 | 1 |
| TAT          | chr16 | 71607434/A//C          | synonymous    | 0 | 1 |
| CNTNAP4      | chr16 | 76482789/G//A          | nonsynonymous | 0 | 1 |
| CNTNAP4      | chr16 | 76555983/G//C          | nonsynonymous | 0 | 1 |
| DNAH2        | chr17 | 7683470/T//C           | synonymous    | 0 | 1 |
| DDX52        | chr17 | 35988675/G//C          | nonsynonymous | 0 | 1 |
| KRT27        | chr17 | 38936568/T//C          | nonsynonymous | 0 | 1 |
| CD300A       | chr17 | 72469704/G//A          | nonsynonymous | 0 | 1 |
| TGIF1        | chr18 | 3457679/C//T           | nonsynonymous | 0 | 1 |

|          |       |                   |               |   |   |
|----------|-------|-------------------|---------------|---|---|
| ADAMTSL5 | chr19 | 1506176/C//T      | synonymous    | 0 | 1 |
| ZNF676   | chr19 | 22363207/C//T     | nonsynonymous | 0 | 1 |
| KIAA0355 | chr19 | 34819054/A//T     | nonsynonymous | 0 | 1 |
| NFKBID   | chr19 | 36387703/C//T     | synonymous    | 0 | 1 |
| LILRA2   | chr19 | 55085309/C//T     | synonymous    | 0 | 1 |
| LILRA2   | chr19 | 55085345/C//T     | synonymous    | 0 | 1 |
| KIF16B   | chr20 | 16360383/T//A     | nonsynonymous | 0 | 1 |
| C20orf78 | chr20 | 18790746/C//T     | nonsynonymous | 0 | 1 |
| APMAP    | chr20 | 24954344/G//A     | nonsynonymous | 0 | 1 |
| BPIFB2   | chr20 | 31609157/C//T     | synonymous    | 0 | 1 |
| CTNBL1   | chr20 | 36406063/G//A     | synonymous    | 0 | 1 |
| ZMYND8   | chr20 | 45850020/G//A     | nonsynonymous | 0 | 1 |
| SYCP2    | chr20 | 58456073/C//T     | nonsynonymous | 0 | 1 |
| CDH4     | chr20 | 60504690/C//T     | nonsynonymous | 0 | 1 |
| TEX33    | chr22 | 37387220/C//A     | nonsynonymous | 0 | 1 |
| BAIAP2L2 | chr22 | 38484909/C//T     | nonsynonymous | 0 | 1 |
| TMEM27   | chrX  | 15682848/A//G     | synonymous    | 0 | 1 |
| KCNH1    | chr1  | 211192426/C//T    | nonsynonymous | 0 | 1 |
| C7       | chr5  | 40909614/G//C     | synonymous    | 0 | 1 |
| DBN1     | chr5  | 176885149/C//T    | synonymous    | 0 | 1 |
| VARS     | chr6  | 31745355/G//A     | synonymous    | 0 | 1 |
| ATM      | chr11 | 108216623/ACTT//A | nonsynonymous | 0 | 1 |
| PLIN4    | chr19 | 4511575/C//G      | synonymous    | 0 | 1 |
| CD52     | chr1  | 26644535/C//T     | synonymous    | 0 | 1 |
| ZSCAN20  | chr1  | 33961016/C//A     | nonsynonymous | 0 | 1 |
| MROH7    | chr1  | 55139709/G//T     | synonymous    | 0 | 1 |
| PRPF3    | chr1  | 150305648/C//A    | nonsynonymous | 0 | 1 |
| RUSC1    | chr1  | 155295653/A//G    | nonsynonymous | 0 | 1 |
| KCNJ9    | chr1  | 160054338/TCTC//T | nonsynonymous | 0 | 1 |
| LMX1A    | chr1  | 165322441/C//A    | nonsynonymous | 0 | 1 |
| LRRCS2   | chr1  | 165532959/G//A    | synonymous    | 0 | 1 |
| ASTN1    | chr1  | 176983962/G//A    | synonymous    | 0 | 1 |
| OBSCN    | chr1  | 228528950/TGAA//T | nonsynonymous | 0 | 1 |
| VRK2     | chr2  | 58373454/G//T     | nonsynonymous | 0 | 1 |
| TACR1    | chr2  | 75425746/G//T     | nonsynonymous | 0 | 1 |
| NEB      | chr2  | 152466344/C//A    | nonsynonymous | 0 | 1 |
| NEB      | chr2  | 152527602/A//G    | nonsynonymous | 0 | 1 |
| HIBCH    | chr2  | 191077780/T//C    | nonsynonymous | 0 | 1 |
| ABCA12   | chr2  | 215872531/T//C    | nonsynonymous | 0 | 1 |
| PTPRN    | chr2  | 220168485/G//A    | nonsynonymous | 0 | 1 |
| EIF4E2   | chr2  | 233431864/G//A    | nonsynonymous | 0 | 1 |
| UBA7     | chr3  | 49847996/C//T     | nonsynonymous | 0 | 1 |
| SEMA3G   | chr3  | 52475350/GAGA//G  | nonsynonymous | 0 | 1 |
| PBRM1    | chr3  | 52610695/G//A     | nonsynonymous | 0 | 1 |
| ZNF654   | chr3  | 88188681/G//A     | nonsynonymous | 0 | 1 |
| SPICE1   | chr3  | 113225453/CT//C   | nonsynonymous | 0 | 1 |
| PLXNA1   | chr3  | 126723491/C//T    | nonsynonymous | 0 | 1 |
| MCM2     | chr3  | 127340009/C//T    | nonsynonymous | 0 | 1 |
| LRRCS4   | chr3  | 169513364/CCTT//C | nonsynonymous | 0 | 1 |
| RTP1     | chr3  | 186915345/G//C    | synonymous    | 0 | 1 |
|          | chr4  | 5894524/C//T      | synonymous    | 0 | 1 |
| TLR3     | chr4  | 187004187/C//T    | synonymous    | 0 | 1 |
| APC      | chr5  | 112175097/TA//T   | nonsynonymous | 0 | 1 |
| LVRN     | chr5  | 115361714/A//T    | nonsynonymous | 0 | 1 |
| EDN1     | chr6  | 12292689/TAAAG//T | nonsynonymous | 0 | 1 |
| SLC17A5  | chr6  | 74363647/A//G     | synonymous    | 0 | 1 |
| FILIP1   | chr6  | 76124433/T//C     | nonsynonymous | 0 | 1 |
| HTR1E    | chr6  | 87725621/C//T     | nonsynonymous | 0 | 1 |
| HTR1E    | chr6  | 87725844/G//A     | synonymous    | 0 | 1 |
| CFAP206  | chr6  | 88125559/C//T     | nonsynonymous | 0 | 1 |
| PM20D2   | chr6  | 89856287/G//A     | nonsynonymous | 0 | 1 |
| ADGB     | chr6  | 146993375/G//C    | nonsynonymous | 0 | 1 |
| NOX3     | chr6  | 155750119/C//T    | synonymous    | 0 | 1 |
| COBL     | chr7  | 51111153/C//T     | nonsynonymous | 0 | 1 |
| ZNF727   | chr7  | 63538770/G//A     | nonsynonymous | 0 | 1 |
| CLIP2    | chr7  | 73778611/TGGA//T  | nonsynonymous | 0 | 1 |
| OR2AE1   | chr7  | 99473990/T//A     | nonsynonymous | 0 | 1 |
| RELN     | chr7  | 103206762/A//G    | synonymous    | 0 | 1 |
| KMT2C    | chr7  | 151853423/A//G    | synonymous    | 0 | 1 |
| CSMD3    | chr8  | 113562966/T//C    | nonsynonymous | 0 | 1 |

|               |       |                   |               |   |   |
|---------------|-------|-------------------|---------------|---|---|
| CDK5RAP2      | chr9  | 123165286/G//A    | nonsynonymous | 0 | 1 |
| TTF1          | chr9  | 135266140/ATCT//A | nonsynonymous | 0 | 1 |
| NDOR1         | chr9  | 140108792/CAG//C  | nonsynonymous | 0 | 1 |
| CUBN          | chr10 | 16882464/T//A     | synonymous    | 0 | 1 |
| CASC10        | chr10 | 21785840/G//A     | synonymous    | 0 | 1 |
| C10orf71      | chr10 | 50533669/C//A     | nonsynonymous | 0 | 1 |
| CCNJ          | chr10 | 97816519/T//TA    | nonsynonymous | 0 | 1 |
| NRIP3         | chr11 | 9009762/C//T      | nonsynonymous | 0 | 1 |
| ATG13         | chr11 | 46670710/A//G     | nonsynonymous | 0 | 1 |
| BTBD18        | chr11 | 57518682/CCTT//C  | synonymous    | 0 | 1 |
| KMT2A         | chr11 | 118344015/C//T    | nonsynonymous | 0 | 1 |
| ARHGEF12      | chr11 | 120295075/A//C    | synonymous    | 0 | 1 |
| FOXM1         | chr12 | 2975690/GGAA//G   | synonymous    | 0 | 1 |
| TAS2R50       | chr12 | 11139209/GAAGT//G | nonsynonymous | 0 | 1 |
| TMTC1         | chr12 | 29904634/G//A     | synonymous    | 0 | 1 |
| SLC25A3       | chr12 | 98991753/ACT//A   | nonsynonymous | 0 | 1 |
| MAPKAPK5      | chr12 | 112306614/C//T    | synonymous    | 0 | 1 |
| GJA3          | chr13 | 20717032/C//T     | synonymous    | 0 | 1 |
| TRPC4         | chr13 | 38229402/C//A     | nonsynonymous | 0 | 1 |
| COG6          | chr13 | 40230001/G//A     | synonymous    | 0 | 1 |
| CCDC168       | chr13 | 103391055/T//C    | nonsynonymous | 0 | 1 |
| OR10G3        | chr14 | 22038380/G//A     | nonsynonymous | 0 | 1 |
| BCL2L2-PABPN1 | chr14 | 23777028/G//T     | nonsynonymous | 0 | 1 |
| SYNE2         | chr14 | 64687196/C//G     | synonymous    | 0 | 1 |
| TDRD9         | chr14 | 104501374/G//A    | nonsynonymous | 0 | 1 |
| GABRG3        | chr15 | 27773121/A//G     | nonsynonymous | 0 | 1 |
| SEMA6D        | chr15 | 48063247/T//C     | synonymous    | 0 | 1 |
| MYO5A         | chr15 | 52656824/T//C     | nonsynonymous | 0 | 1 |
| RHOT2         | chr16 | 722370/G//A       | nonsynonymous | 0 | 1 |
| MMP25         | chr16 | 3100249/C//T      | synonymous    | 0 | 1 |
| KCTD19        | chr16 | 67328477/GCTTA//G | nonsynonymous | 0 | 1 |
| GPR179        | chr17 | 36482529/CCTT//C  | nonsynonymous | 0 | 1 |
| FAM134C       | chr17 | 40761321/G//A     | nonsynonymous | 0 | 1 |
| EPX           | chr17 | 56276569/G//T     | synonymous    | 0 | 1 |
| CLTC          | chr17 | 57768030/AAAG//A  | nonsynonymous | 0 | 1 |
| GGA3          | chr17 | 73237555/T//C     | nonsynonymous | 0 | 1 |
| RHBDF2        | chr17 | 74471161/G//A     | nonsynonymous | 0 | 1 |
| PIGU          | chr20 | 33264825/G//C     | nonsynonymous | 0 | 1 |
| EMILIN3       | chr20 | 39991219/ACACT//A | nonsynonymous | 0 | 1 |
| CDH22         | chr20 | 44841656/T//C     | nonsynonymous | 0 | 1 |
| COL20A1       | chr20 | 61943889/C//T     | nonsynonymous | 0 | 1 |
| TMPRSS15      | chr21 | 19770649/A//G     | synonymous    | 0 | 1 |
| IL10RB        | chr21 | 34649060/T//G     | nonsynonymous | 0 | 1 |
| IL10RB        | chr21 | 34649062/A//T     | synonymous    | 0 | 1 |
|               | chrX  | 131842512/A//C    | synonymous    | 0 | 1 |
| EVI5          | chr1  | 93170107/A//G     | synonymous    | 1 | 0 |
| TUFT1         | chr1  | 151547482/G//C    | nonsynonymous | 1 | 0 |
| THEM5         | chr1  | 151820687/G//A    | synonymous    | 1 | 0 |
| HDGF          | chr1  | 156713499/C//G    | nonsynonymous | 1 | 0 |
| AOX1          | chr2  | 201527611/C//T    | synonymous    | 1 | 0 |
| SFMBT1        | chr3  | 52939283/C//G     | nonsynonymous | 1 | 0 |
| NIT2          | chr3  | 100074154/T//C    | synonymous    | 1 | 0 |
|               | chr4  | 122148570/C//A    | synonymous    | 1 | 0 |
| PCDHA5        | chr5  | 140202808/C//T    | nonsynonymous | 1 | 0 |
| COL28A1       | chr7  | 7529063/G//A      | nonsynonymous | 1 | 0 |
| ZNF92         | chr7  | 64864377/T//A     | nonsynonymous | 1 | 0 |
| SLC26A5       | chr7  | 103017274/T//C    | synonymous    | 1 | 0 |
| GIMAP8        | chr7  | 150171469/T//A    | nonsynonymous | 1 | 0 |
| NEBL          | chr10 | 21076214/G//T     | nonsynonymous | 1 | 0 |
| PDE3A         | chr12 | 20799806/G//A     | synonymous    | 1 | 0 |
| METTTL7B      | chr12 | 56075897/A//T     | nonsynonymous | 1 | 0 |
| MYBPC1        | chr12 | 102069131/C//T    | synonymous    | 1 | 0 |
| MYBPC1        | chr12 | 102071165/C//T    | synonymous    | 1 | 0 |
| DDX54         | chr12 | 113618768/C//CTTT | nonsynonymous | 1 | 0 |
| PAX9          | chr14 | 37132303/G//A     | nonsynonymous | 1 | 0 |
| PRKCB         | chr16 | 24135288/G//A     | nonsynonymous | 1 | 0 |
| PRKCB         | chr16 | 24135292/G//A     | nonsynonymous | 1 | 0 |
| RNF157        | chr17 | 74158640/T//A     | nonsynonymous | 1 | 0 |
| CBLN2         | chr18 | 70205557/G//T     | nonsynonymous | 1 | 0 |
| CYP4F2        | chr19 | 16003209/G//T     | nonsynonymous | 1 | 0 |

|             |       |                             |               |   |   |
|-------------|-------|-----------------------------|---------------|---|---|
| FPGT-TNNI3K | chr1  | 75009635/G//A               | nonsynonymous | 0 | 1 |
| ACTA1       | chr1  | 229568022/G//A              | nonsynonymous | 0 | 1 |
| OR2M4       | chr1  | 248402692/T//A              | synonymous    | 0 | 1 |
| USP39       | chr2  | 85843229/G//T               | synonymous    | 0 | 1 |
| HOXD10      | chr2  | 176983761/GCAC//G           | nonsynonymous | 0 | 1 |
| TTN         | chr2  | 179498143/C//T              | nonsynonymous | 0 | 1 |
| SNED1       | chr2  | 241992622/C//T              | synonymous    | 0 | 1 |
| RTP1        | chr3  | 186915535/C//A              | nonsynonymous | 0 | 1 |
| HSPA9       | chr5  | 137903256/G//T              | synonymous    | 0 | 1 |
| FIG4        | chr6  | 110059570/G//A              | nonsynonymous | 0 | 1 |
| RPA3        | chr7  | 7677540/A//C                | nonsynonymous | 0 | 1 |
| AMPH        | chr7  | 38515010/C//A               | nonsynonymous | 0 | 1 |
| ZNF3        | chr7  | 99669695/T//TTTTTCAGACTGACT | nonsynonymous | 0 | 1 |
| MUC17       | chr7  | 100683521/G//A              | nonsynonymous | 0 | 1 |
| PENK        | chr8  | 57354184/C//T               | nonsynonymous | 0 | 1 |
| TSPYL5      | chr8  | 98289971/G//A               | synonymous    | 0 | 1 |
| LRP12       | chr8  | 105510312/G//T              | synonymous    | 0 | 1 |
| PPP1R3C     | chr10 | 93390459/G//T               | nonsynonymous | 0 | 1 |
| MMS19       | chr10 | 99220700/C//T               | synonymous    | 0 | 1 |
| ADAM8       | chr10 | 135085450/G//T              | nonsynonymous | 0 | 1 |
| NT5DC3      | chr12 | 104171660/C//G              | nonsynonymous | 0 | 1 |
| ATP7B       | chr13 | 52515275/A//C               | nonsynonymous | 0 | 1 |
|             | chr16 | 66582929/A//G               | synonymous    | 0 | 1 |
| ZFHX3       | chr16 | 72993436/G//A               | synonymous    | 0 | 1 |
| USP10       | chr16 | 84778593/A//T               | nonsynonymous | 0 | 1 |
| CCDC144NL   | chr17 | 20769899/G//T               | nonsynonymous | 0 | 1 |
| CCDC144NL   | chr17 | 20769904/G//A               | synonymous    | 0 | 1 |
| ABCA10      | chr17 | 67160237/G//C               | nonsynonymous | 0 | 1 |
| C18orf8     | chr18 | 21109621/T//C               | nonsynonymous | 0 | 1 |
| MBD3        | chr19 | 1581165/C//G                | nonsynonymous | 0 | 1 |
| ZNF208      | chr19 | 22154522/C//T               | nonsynonymous | 0 | 1 |
| CEACAM5     | chr19 | 42223790/ATGCCTGTGAGGAATC   | nonsynonymous | 0 | 1 |
| ZNF835      | chr19 | 57175312/T//C               | nonsynonymous | 0 | 1 |
| BPIFA1      | chr20 | 31829869/C//G               | nonsynonymous | 0 | 1 |
| IL1RAPL1    | chrX  | 29973480/A//G               | nonsynonymous | 0 | 1 |
| ANAPC4      | chr4  | 25408830/T//C               | synonymous    | 0 | 1 |
| NAALADL1    | chr11 | 64825678/T//C               | nonsynonymous | 0 | 1 |
| ULK3        | chr15 | 75130094/T//C               | nonsynonymous | 0 | 1 |
| ZNF626      | chr19 | 20807474/G//T               | synonymous    | 0 | 1 |
| ADGRB2      | chr1  | 32203115/C//A               | nonsynonymous | 0 | 1 |
|             | chr1  | 33476387/C//T               | synonymous    | 0 | 1 |
|             | chr1  | 33476396/G//A               | synonymous    | 0 | 1 |
|             | chr1  | 33476404/T//G               | synonymous    | 0 | 1 |
| SERBP1      | chr1  | 67889969/A//G               | synonymous    | 0 | 1 |
| TTN         | chr2  | 179396885/G//A              | synonymous    | 0 | 1 |
| DMGDH       | chr5  | 78365412/C//T               | nonsynonymous | 0 | 1 |
| MUC17       | chr7  | 100683233/A//G              | nonsynonymous | 0 | 1 |
| MUC17       | chr7  | 100683240/G//C              | nonsynonymous | 0 | 1 |
| MUC17       | chr7  | 100684389/A//C              | nonsynonymous | 0 | 1 |
| MEST        | chr7  | 130138309/T//C              | nonsynonymous | 0 | 1 |
| KIAA1549    | chr7  | 138601659/C//T              | nonsynonymous | 0 | 1 |
| MMP16       | chr8  | 89209517/C//T               | nonsynonymous | 0 | 1 |
| OR1L8       | chr9  | 125330145/T//C              | synonymous    | 0 | 1 |
| LCN1        | chr9  | 138416725/C//T              | synonymous    | 0 | 1 |
| PALD1       | chr10 | 72324237/G//A               | nonsynonymous | 0 | 1 |
| ALG8        | chr11 | 77815396/G//A               | synonymous    | 0 | 1 |
| TMEM132C    | chr12 | 128899647/C//T              | synonymous    | 0 | 1 |
| CHFR        | chr12 | 133425249/G//A              | synonymous    | 0 | 1 |
| CYFIP1      | chr15 | 22925862/C//G               | nonsynonymous | 0 | 1 |
| FBN1        | chr15 | 48776038/G//A               | nonsynonymous | 0 | 1 |
| TP53        | chr17 | 7578253/C//A                | nonsynonymous | 0 | 1 |
| C18orf32    | chr18 | 47010042/G//T               | nonsynonymous | 0 | 1 |
| ZNF493      | chr19 | 21607030/C//A               | synonymous    | 0 | 1 |
| GAPDHS      | chr19 | 36029295/C//T               | nonsynonymous | 0 | 1 |
| FCGBP       | chr19 | 40434072/G//A               | nonsynonymous | 0 | 1 |
| TRPM4       | chr19 | 49693561/C//T               | nonsynonymous | 0 | 1 |
| ZNF776      | chr19 | 58265741/T//TG              | nonsynonymous | 0 | 1 |
| ASIP        | chr20 | 32850684/G//T               | nonsynonymous | 0 | 1 |
| RGS19       | chr20 | 62707990/G//A               | nonsynonymous | 0 | 1 |
| COL6A2      | chr21 | 47546454/A//G               | synonymous    | 0 | 1 |

|          |       |                    |               |   |   |
|----------|-------|--------------------|---------------|---|---|
| NUDT10   | chrX  | 51075748/G//C      | synonymous    | 0 | 1 |
| NUDT10   | chrX  | 51075755/A//G      | synonymous    | 0 | 1 |
| NHSL2    | chrX  | 71359952/G//A      | nonsynonymous | 0 | 1 |
| SCNN1D   | chr1  | 1223181/C//T       | nonsynonymous | 0 | 1 |
| WDTC1    | chr1  | 27632878/C//T      | synonymous    | 0 | 1 |
| S1PR1    | chr1  | 101705240/C//T     | nonsynonymous | 0 | 1 |
| PRPF3    | chr1  | 150312945/A//G     | nonsynonymous | 0 | 1 |
| OR6Y1    | chr1  | 158517100/G//A     | nonsynonymous | 0 | 1 |
| SPTA1    | chr1  | 158582712/C//A     | synonymous    | 0 | 1 |
| TP53BP2  | chr1  | 224009051/G//GATAC | nonsynonymous | 0 | 1 |
| DNAH14   | chr1  | 225418830/C//T     | synonymous    | 0 | 1 |
| DNAH14   | chr1  | 225418856/C//T     | synonymous    | 0 | 1 |
| MYT1L    | chr2  | 1914112/C//T       | nonsynonymous | 0 | 1 |
| OTOF     | chr2  | 26712121/C//T      | nonsynonymous | 0 | 1 |
| DYSF     | chr2  | 71755516/C//T      | synonymous    | 0 | 1 |
| ZNF514   | chr2  | 95818911/T//G      | nonsynonymous | 0 | 1 |
| SH3RF3   | chr2  | 110049067/C//T     | nonsynonymous | 0 | 1 |
| PTPRN    | chr2  | 220161043/C//T     | nonsynonymous | 0 | 1 |
| NYAP2    | chr2  | 226447359/C//T     | nonsynonymous | 0 | 1 |
| ALPPL2   | chr2  | 233273244/C//A     | nonsynonymous | 0 | 1 |
| HRH1     | chr3  | 11300836/G//T      | nonsynonymous | 0 | 1 |
| ULK4     | chr3  | 41795958/C//T      | nonsynonymous | 0 | 1 |
| FLNB     | chr3  | 58110223/T//C      | nonsynonymous | 0 | 1 |
| KY       | chr3  | 134323032/C//A     | nonsynonymous | 0 | 1 |
| SKIL     | chr3  | 170078221/G//C     | synonymous    | 0 | 1 |
| NAALADL2 | chr3  | 174951783/A//T     | nonsynonymous | 0 | 1 |
| DNAJB11  | chr3  | 186302347/A//C     | synonymous    | 0 | 1 |
| ZFYVE28  | chr4  | 2341196/C//T       | nonsynonymous | 0 | 1 |
| SLIT2    | chr4  | 20255355/G//A      | synonymous    | 0 | 1 |
| COMMD8   | chr4  | 47465645/G//A      | synonymous    | 0 | 1 |
| RNF150   | chr4  | 141832422/G//A     | synonymous    | 0 | 1 |
| TRIO     | chr5  | 14369609/G//A      | nonsynonymous | 0 | 1 |
| SLC38A9  | chr5  | 54922354/C//T      | nonsynonymous | 0 | 1 |
| ARHGEF28 | chr5  | 73207312/G//A      | synonymous    | 0 | 1 |
| APC      | chr5  | 112175480/G//T     | nonsynonymous | 0 | 1 |
| PCDHB13  | chr5  | 140595723/G//A     | synonymous    | 0 | 1 |
| PCDHGB3  | chr5  | 140750854/C//T     | nonsynonymous | 0 | 1 |
| HDAC3    | chr5  | 141005808/G//A     | synonymous    | 0 | 1 |
| KIF13A   | chr6  | 17783899/T//G      | synonymous    | 0 | 1 |
| HLA-DRA  | chr6  | 32410347/C//T      | nonsynonymous | 0 | 1 |
| FOXP4    | chr6  | 41559001/A//G      | nonsynonymous | 0 | 1 |
| ZNF292   | chr6  | 87969545/A//G      | synonymous    | 0 | 1 |
| AKAP12   | chr6  | 151673991/T//C     | nonsynonymous | 0 | 1 |
| CCDC129  | chr7  | 31614355/C//T      | synonymous    | 0 | 1 |
| PDE1C    | chr7  | 31890277/T//A      | nonsynonymous | 0 | 1 |
| COL1A2   | chr7  | 94057162/G//A      | nonsynonymous | 0 | 1 |
| CCDC136  | chr7  | 128457907/G//A     | synonymous    | 0 | 1 |
| HTR5A    | chr7  | 154862972/C//T     | synonymous    | 0 | 1 |
| DLGAP2   | chr8  | 1616768/G//A       | nonsynonymous | 0 | 1 |
| HR       | chr8  | 21976581/G//A      | synonymous    | 0 | 1 |
| NRG1     | chr8  | 32617751/C//T      | synonymous    | 0 | 1 |
| RBM12B   | chr8  | 94747853/T//G      | nonsynonymous | 0 | 1 |
| ADGRB1   | chr8  | 143614743/C//T     | synonymous    | 0 | 1 |
| ZFP41    | chr8  | 144332401/G//A     | nonsynonymous | 0 | 1 |
| PLEC     | chr8  | 144998262/C//T     | synonymous    | 0 | 1 |
| KIAA2026 | chr9  | 5944921/T//A       | nonsynonymous | 0 | 1 |
| NOL8     | chr9  | 95078250/C//G      | nonsynonymous | 0 | 1 |
| CCDC180  | chr9  | 100111480/A//C     | nonsynonymous | 0 | 1 |
| COL15A1  | chr9  | 101777835/G//A     | nonsynonymous | 0 | 1 |
| TNC      | chr9  | 117849524/G//A     | synonymous    | 0 | 1 |
| TSC1     | chr9  | 135772018/T//TC    | nonsynonymous | 0 | 1 |
| CACNA1B  | chr9  | 140919436/G//T     | nonsynonymous | 0 | 1 |
| ITPRIP   | chr10 | 106074893/G//A     | nonsynonymous | 0 | 1 |
| CACUL1   | chr10 | 120445584/C//T     | synonymous    | 0 | 1 |
| IKZF5    | chr10 | 124753870/C//T     | nonsynonymous | 0 | 1 |
| MUC2     | chr11 | 1086062/G//C       | nonsynonymous | 0 | 1 |
| NAV2     | chr11 | 20005744/C//T      | nonsynonymous | 0 | 1 |
| PCNX3    | chr11 | 65385924/C//T      | nonsynonymous | 0 | 1 |
| SLCO1C1  | chr12 | 20858984/C//T      | nonsynonymous | 0 | 1 |
| FZD10    | chr12 | 130647807/G//A     | nonsynonymous | 0 | 1 |

|            |       |                 |               |   |   |
|------------|-------|-----------------|---------------|---|---|
| GALNT9     | chr12 | 132688190/C//T  | nonsynonymous | 0 | 1 |
| GJA3       | chr13 | 20716950/C//T   | nonsynonymous | 0 | 1 |
| WDR89      | chr14 | 64065773/G//T   | nonsynonymous | 0 | 1 |
| DCAF5      | chr14 | 69521868/C//T   | nonsynonymous | 0 | 1 |
| ABCD4      | chr14 | 74763130/C//T   | nonsynonymous | 0 | 1 |
| KCNK10     | chr14 | 88652306/C//T   | nonsynonymous | 0 | 1 |
| AHNAK2     | chr14 | 105407965/G//A  | nonsynonymous | 0 | 1 |
| ATP10A     | chr15 | 25959144/G//A   | nonsynonymous | 0 | 1 |
| RYR3       | chr15 | 34152846/C//T   | nonsynonymous | 0 | 1 |
| ACTC1      | chr15 | 35084689/C//T   | nonsynonymous | 0 | 1 |
| DUOXA1     | chr15 | 45415067/G//A   | nonsynonymous | 0 | 1 |
| PIGB       | chr15 | 55647094/A//T   | nonsynonymous | 0 | 1 |
| SYNM       | chr15 | 99670458/C//T   | synonymous    | 0 | 1 |
| ABCA3      | chr16 | 2329026/G//A    | nonsynonymous | 0 | 1 |
| TP53       | chr17 | 7579349/A//G    | nonsynonymous | 0 | 1 |
| KRT33A     | chr17 | 39506777/G//A   | synonymous    | 0 | 1 |
| SDK2       | chr17 | 71410804/G//A   | synonymous    | 0 | 1 |
| MIR6785    | chr17 | 73494642/C//T   | synonymous    | 0 | 1 |
|            | chr19 | 3852565/C//G    | synonymous    | 0 | 1 |
| ZBTB7A     | chr19 | 4054557/G//T    | nonsynonymous | 0 | 1 |
| TIMM44     | chr19 | 7997740/C//T    | nonsynonymous | 0 | 1 |
| PPFIA3     | chr19 | 49636350/C//T   | synonymous    | 0 | 1 |
| TSKS       | chr19 | 50266451/G//A   | synonymous    | 0 | 1 |
| PPP6R1     | chr19 | 55752908/G//A   | synonymous    | 0 | 1 |
| HSPBP1     | chr19 | 55789129/A//G   | nonsynonymous | 0 | 1 |
| ZNF418     | chr19 | 58441821/C//A   | nonsynonymous | 0 | 1 |
| CTSA       | chr20 | 44520671/GT//G  | synonymous    | 0 | 1 |
| OCSTAMP    | chr20 | 45170434/C//T   | nonsynonymous | 0 | 1 |
| CDH26      | chr20 | 58558000/G//A   | nonsynonymous | 0 | 1 |
| ABHD16B    | chr20 | 62493892/CCT//C | nonsynonymous | 0 | 1 |
| TPTE       | chr21 | 10916424/G//T   | nonsynonymous | 0 | 1 |
| KRTAP10-6  | chr21 | 46011459/A//T   | nonsynonymous | 0 | 1 |
| KRTAP10-10 | chr21 | 46057634/T//C   | synonymous    | 0 | 1 |
| IL17RA     | chr22 | 17590339/G//A   | nonsynonymous | 0 | 1 |
| GABRA3     | chrX  | 151376560/C//T  | nonsynonymous | 0 | 1 |
| IL9R       | chrX  | 155232691/G//A  | synonymous    | 0 | 1 |
| C1orf127   | chr1  | 11015069/G//A   | nonsynonymous | 0 | 1 |
| MTOR       | chr1  | 11291472/C//T   | nonsynonymous | 0 | 1 |
| NUDC       | chr1  | 27269428/C//T   | nonsynonymous | 0 | 1 |
| CSMD2      | chr1  | 34042990/G//A   | synonymous    | 0 | 1 |
| ADGRL2     | chr1  | 82445558/T//G   | nonsynonymous | 0 | 1 |
| ATP1A1     | chr1  | 116940595/G//GA | nonsynonymous | 0 | 1 |
| CD2        | chr1  | 117311137/G//A  | nonsynonymous | 0 | 1 |
| PDE4DIP    | chr1  | 144917819/C//T  | synonymous    | 0 | 1 |
| SNX27      | chr1  | 151665508/C//T  | nonsynonymous | 0 | 1 |
| FLG        | chr1  | 152279766/C//T  | synonymous    | 0 | 1 |
| MROH9      | chr1  | 170952642/G//T  | nonsynonymous | 0 | 1 |
| LMOD1      | chr1  | 201868770/G//A  | synonymous    | 0 | 1 |
| PTPN7      | chr1  | 202127427/C//T  | nonsynonymous | 0 | 1 |
| PPP1R12B   | chr1  | 202462309/C//G  | nonsynonymous | 0 | 1 |
| SYT2       | chr1  | 202571524/A//T  | nonsynonymous | 0 | 1 |
| PIK3C2B    | chr1  | 204438146/G//A  | nonsynonymous | 0 | 1 |
| NFASC      | chr1  | 204956671/A//G  | synonymous    | 0 | 1 |
| CAPN9      | chr1  | 230898463/G//A  | nonsynonymous | 0 | 1 |
| OPN3       | chr1  | 241757901/C//A  | nonsynonymous | 0 | 1 |
| OPN3       | chr1  | 241757914/C//T  | nonsynonymous | 0 | 1 |
| LYPD8      | chr1  | 248902813/C//T  | synonymous    | 0 | 1 |
| PXDN       | chr2  | 1647152/C//T    | nonsynonymous | 0 | 1 |
| GREB1      | chr2  | 11725913/G//A   | synonymous    | 0 | 1 |
| EFR3B      | chr2  | 25344633/C//T   | nonsynonymous | 0 | 1 |
| STON1      | chr2  | 48822492/C//T   | synonymous    | 0 | 1 |
| CD207      | chr2  | 71061146/G//T   | synonymous    | 0 | 1 |
| TLX2       | chr2  | 74743192/G//A   | nonsynonymous | 0 | 1 |
| NPHP1      | chr2  | 110959012/T//C  | synonymous    | 0 | 1 |
| FIGN       | chr2  | 164466711/C//G  | nonsynonymous | 0 | 1 |
| XIRP2      | chr2  | 168105787/C//T  | nonsynonymous | 0 | 1 |
| RAPGEF4    | chr2  | 173916484/C//T  | nonsynonymous | 0 | 1 |
| TTN        | chr2  | 179588222/G//T  | nonsynonymous | 0 | 1 |
| ZNF804A    | chr2  | 185800665/C//A  | nonsynonymous | 0 | 1 |
| SDPR       | chr2  | 192701184/C//T  | nonsynonymous | 0 | 1 |

|          |       |                 |               |   |   |
|----------|-------|-----------------|---------------|---|---|
| SF3B1    | chr2  | 198268383/G//A  | nonsynonymous | 0 | 1 |
| FAM124B  | chr2  | 225266035/C//G  | nonsynonymous | 0 | 1 |
| UBE2E2   | chr3  | 23631309/G//A   | nonsynonymous | 0 | 1 |
| ARPP21   | chr3  | 35780803/T//G   | synonymous    | 0 | 1 |
| SETD2    | chr3  | 47147574/G//A   | synonymous    | 0 | 1 |
| IMPDH2   | chr3  | 49065725/T//G   | nonsynonymous | 0 | 1 |
| MAGI1    | chr3  | 65425594/C//A   | nonsynonymous | 0 | 1 |
| LRIG1    | chr3  | 66455621/C//G   | nonsynonymous | 0 | 1 |
| MITF     | chr3  | 70014217/G//A   | nonsynonymous | 0 | 1 |
| FRG2C    | chr3  | 75714950/C//A   | nonsynonymous | 0 | 1 |
| FRG2C    | chr3  | 75714980/C//A   | synonymous    | 0 | 1 |
| DTX3L    | chr3  | 122288808/TC//T | nonsynonymous | 0 | 1 |
| PLXNA1   | chr3  | 126707962/G//A  | nonsynonymous | 0 | 1 |
| CLDN18   | chr3  | 137749822/G//A  | nonsynonymous | 0 | 1 |
| CHST2    | chr3  | 142840662/G//A  | nonsynonymous | 0 | 1 |
| BCHE     | chr3  | 165548605/T//G  | nonsynonymous | 0 | 1 |
| EPHB3    | chr3  | 184299294/AC//A | synonymous    | 0 | 1 |
| MUC4     | chr3  | 195477791/G//A  | synonymous    | 0 | 1 |
| ZFYVE28  | chr4  | 2272571/G//A    | nonsynonymous | 0 | 1 |
|          | chr4  | 6043906/G//T    | synonymous    | 0 | 1 |
| NWD2     | chr4  | 37445570/G//A   | nonsynonymous | 0 | 1 |
| DCAF4L1  | chr4  | 41985017/G//A   | synonymous    | 0 | 1 |
| KDR      | chr4  | 55968597/G//A   | nonsynonymous | 0 | 1 |
| UNC5C    | chr4  | 96469992/C//T   | nonsynonymous | 0 | 1 |
| PCDH10   | chr4  | 134072608/G//A  | nonsynonymous | 0 | 1 |
| PCDH10   | chr4  | 134073220/G//A  | nonsynonymous | 0 | 1 |
| FREM3    | chr4  | 144619718/T//C  | nonsynonymous | 0 | 1 |
| SH3D19   | chr4  | 152048847/C//G  | nonsynonymous | 0 | 1 |
| AADAT    | chr4  | 171010904/G//A  | synonymous    | 0 | 1 |
| TRIML1   | chr4  | 189063516/A//G  | synonymous    | 0 | 1 |
| APC      | chr5  | 112175324/G//T  | nonsynonymous | 0 | 1 |
| PCDHA7   | chr5  | 140215612/C//T  | synonymous    | 0 | 1 |
| PCDHB5   | chr5  | 140515898/C//T  | synonymous    | 0 | 1 |
| PCDHB7   | chr5  | 140554747/A//C  | synonymous    | 0 | 1 |
| CCDC69   | chr5  | 150562922/C//T  | synonymous    | 0 | 1 |
| HIST1H4B | chr6  | 26027476/G//A   | nonsynonymous | 0 | 1 |
| TRIM10   | chr6  | 30122008/C//T   | nonsynonymous | 0 | 1 |
| C2       | chr6  | 31911201/C//A   | nonsynonymous | 0 | 1 |
| PHF1     | chr6  | 33382788/G//A   | nonsynonymous | 0 | 1 |
| ADGRB3   | chr6  | 69943287/G//T   | nonsynonymous | 0 | 1 |
| FAXC     | chr6  | 99771429/C//T   | synonymous    | 0 | 1 |
| AKAP12   | chr6  | 151670824/C//T  | nonsynonymous | 0 | 1 |
| SYNE1    | chr6  | 152652719/G//A  | synonymous    | 0 | 1 |
| LPA      | chr6  | 160968970/C//G  | nonsynonymous | 0 | 1 |
| GRID2IP  | chr7  | 6590860/G//A    | nonsynonymous | 0 | 1 |
| MET      | chr7  | 116339238/G//A  | nonsynonymous | 0 | 1 |
| RBM28    | chr7  | 127983793/G//A  | nonsynonymous | 0 | 1 |
| TMEM213  | chr7  | 138487844/C//T  | synonymous    | 0 | 1 |
| TMEM178B | chr7  | 140912470/G//A  | synonymous    | 0 | 1 |
| CSMD1    | chr8  | 3165968/C//T    | nonsynonymous | 0 | 1 |
| BLK      | chr8  | 11406628/A//G   | nonsynonymous | 0 | 1 |
| USP17L2  | chr8  | 11995059/G//A   | nonsynonymous | 0 | 1 |
| MSR1     | chr8  | 15978003/G//A   | synonymous    | 0 | 1 |
| STMN4    | chr8  | 27094329/C//T   | synonymous    | 0 | 1 |
| PRKDC    | chr8  | 48771530/C//T   | synonymous    | 0 | 1 |
| NPBWR1   | chr8  | 53852577/C//A   | nonsynonymous | 0 | 1 |
|          | chr8  | 85097141/T//C   | synonymous    | 0 | 1 |
| MMP16    | chr8  | 89179901/C//T   | nonsynonymous | 0 | 1 |
| TSPYL5   | chr8  | 98289940/C//T   | nonsynonymous | 0 | 1 |
| ZFP41    | chr8  | 144332656/G//A  | synonymous    | 0 | 1 |
| CCDC171  | chr9  | 15744625/C//T   | nonsynonymous | 0 | 1 |
| UBAP1    | chr9  | 34241696/T//C   | nonsynonymous | 0 | 1 |
| CD72     | chr9  | 35618230/C//T   | nonsynonymous | 0 | 1 |
| C9orf64  | chr9  | 86570455/T//C   | synonymous    | 0 | 1 |
| ZNF782   | chr9  | 99581108/G//A   | synonymous    | 0 | 1 |
| ZFP37    | chr9  | 115806161/C//A  | nonsynonymous | 0 | 1 |
| SFMBT2   | chr10 | 7409746/C//T    | nonsynonymous | 0 | 1 |
| ARMC3    | chr10 | 23290920/G//A   | nonsynonymous | 0 | 1 |
| ZEB1     | chr10 | 31810508/A//T   | nonsynonymous | 0 | 1 |
| WDFY4    | chr10 | 50108272/G//A   | nonsynonymous | 0 | 1 |



|           |       |                  |               |   |   |
|-----------|-------|------------------|---------------|---|---|
| MYPN      | chr10 | 69959257/G//A    | nonsynonymous | 0 | 1 |
| RBM20     | chr10 | 112583354/G//T   | nonsynonymous | 0 | 1 |
| TCERG1L   | chr10 | 133107543/G//C   | nonsynonymous | 0 | 1 |
| OR51D1    | chr11 | 4661424/G//A     | nonsynonymous | 0 | 1 |
| OR51G1    | chr11 | 4944909/C//T     | nonsynonymous | 0 | 1 |
| PRKCDBP   | chr11 | 6340592/C//T     | nonsynonymous | 0 | 1 |
| DCHS1     | chr11 | 6661827/G//A     | nonsynonymous | 0 | 1 |
| SBF2      | chr11 | 10051373/G//T    | nonsynonymous | 0 | 1 |
| ADM       | chr11 | 10327269/C//T    | synonymous    | 0 | 1 |
| BTBD10    | chr11 | 13435172/C//T    | nonsynonymous | 0 | 1 |
| PRMT3     | chr11 | 20515739/C//G    | nonsynonymous | 0 | 1 |
| KIAA1549L | chr11 | 33631349/C//T    | nonsynonymous | 0 | 1 |
| LRRC55    | chr11 | 56954811/A//G    | nonsynonymous | 0 | 1 |
| SLC22A9   | chr11 | 63177310/G//A    | synonymous    | 0 | 1 |
| DYNC2H1   | chr11 | 103006456/C//T   | nonsynonymous | 0 | 1 |
| GRIA4     | chr11 | 105774539/G//A   | nonsynonymous | 0 | 1 |
| FGF23     | chr12 | 4479711/G//A     | nonsynonymous | 0 | 1 |
| KCNA5     | chr12 | 5153592/C//T     | synonymous    | 0 | 1 |
| CLEC12A   | chr12 | 10131592/G//A    | nonsynonymous | 0 | 1 |
| ITPR2     | chr12 | 26839532/G//A    | nonsynonymous | 0 | 1 |
| DENND5B   | chr12 | 31633096/G//A    | nonsynonymous | 0 | 1 |
| ADAMTS20  | chr12 | 43895992/G//T    | nonsynonymous | 0 | 1 |
| DIP2B     | chr12 | 51135262/G//A    | nonsynonymous | 0 | 1 |
| TARBP2    | chr12 | 53898584/C//T    | nonsynonymous | 0 | 1 |
| TESPA1    | chr12 | 55356244/G//A    | nonsynonymous | 0 | 1 |
| USP15     | chr12 | 62778051/G//C    | nonsynonymous | 0 | 1 |
| CLIP1     | chr12 | 122825735/G//A   | synonymous    | 0 | 1 |
| TNFRSF19  | chr13 | 24200860/C//T    | nonsynonymous | 0 | 1 |
| WASF3     | chr13 | 27216411/C//T    | nonsynonymous | 0 | 1 |
| CSNK1A1L  | chr13 | 37679574/G//A    | synonymous    | 0 | 1 |
|           | chr13 | 45911548/T//A    | synonymous    | 0 | 1 |
| COL4A2    | chr13 | 111125291/G//A   | nonsynonymous | 0 | 1 |
| OR4K15    | chr14 | 20443944/C//T    | synonymous    | 0 | 1 |
| RAB2B     | chr14 | 21930566/G//A    | synonymous    | 0 | 1 |
| MIS18BP1  | chr14 | 45711497/T//G    | nonsynonymous | 0 | 1 |
| MAP3K9    | chr14 | 71275841/A//AGCG | nonsynonymous | 0 | 1 |
| MAP3K9    | chr14 | 71275847/G//GGC  | nonsynonymous | 0 | 1 |
| SPTBN5    | chr15 | 42160355/C//T    | nonsynonymous | 0 | 1 |
| ZNF106    | chr15 | 42731621/C//T    | nonsynonymous | 0 | 1 |
| PYGO1     | chr15 | 55838402/T//C    | nonsynonymous | 0 | 1 |
| IGDCC4    | chr15 | 65688147/C//T    | nonsynonymous | 0 | 1 |
| EFL1      | chr15 | 82521441/T//C    | nonsynonymous | 0 | 1 |
| KIF7      | chr15 | 90192286/G//A    | nonsynonymous | 0 | 1 |
| CASKIN1   | chr16 | 2239249/C//T     | nonsynonymous | 0 | 1 |
| FOXC2     | chr16 | 86601863/G//A    | nonsynonymous | 0 | 1 |
| FOXL1     | chr16 | 86612374/G//A    | synonymous    | 0 | 1 |
| TP53      | chr17 | 7577570/C//A     | nonsynonymous | 0 | 1 |
| MAPK7     | chr17 | 19283207/C//T    | synonymous    | 0 | 1 |
| RHBDL3    | chr17 | 30648078/G//A    | nonsynonymous | 0 | 1 |
| KRT12     | chr17 | 39023165/C//G    | nonsynonymous | 0 | 1 |
| KRTAP17-1 | chr17 | 39471556/G//A    | synonymous    | 0 | 1 |
| B4GALNT2  | chr17 | 47241524/C//T    | nonsynonymous | 0 | 1 |
| TMEM200C  | chr18 | 5891154/C//A     | synonymous    | 0 | 1 |
| MTCL1     | chr18 | 8825566/G//C     | nonsynonymous | 0 | 1 |
| PIEZO2    | chr18 | 10759788/G//T    | synonymous    | 0 | 1 |
| CDH2      | chr18 | 25591863/G//A    | nonsynonymous | 0 | 1 |
| SMAD4     | chr18 | 48593530/T//C    | synonymous    | 0 | 1 |
| STARD6    | chr18 | 51858190/C//T    | nonsynonymous | 0 | 1 |
| KCNG2     | chr18 | 77659375/C//T    | synonymous    | 0 | 1 |
| PTPRS     | chr19 | 5223298/G//A     | synonymous    | 0 | 1 |
| S1PR5     | chr19 | 10625298/C//T    | synonymous    | 0 | 1 |
| TSHZ3     | chr19 | 31767972/C//T    | synonymous    | 0 | 1 |
|           | chr19 | 34302791/A//G    | synonymous    | 0 | 1 |
| CBLC      | chr19 | 45284578/C//T    | synonymous    | 0 | 1 |
| VSIG10L   | chr19 | 51837453/C//T    | nonsynonymous | 0 | 1 |
| KIR3DL1   | chr19 | 55333029/A//G    | nonsynonymous | 0 | 1 |
| KCNQ2     | chr20 | 62038051/C//T    | synonymous    | 0 | 1 |
| AP1B1     | chr22 | 29736694/G//A    | nonsynonymous | 0 | 1 |
| TBL1X     | chrX  | 9656230/G//A     | synonymous    | 0 | 1 |
| ZRSR2     | chrX  | 15836766/G//A    | nonsynonymous | 0 | 1 |

|           |       |                   |               |   |   |
|-----------|-------|-------------------|---------------|---|---|
| SSX3      | chrX  | 48209429/C//A     | nonsynonymous | 0 | 1 |
| CACNA1F   | chrX  | 49071665/G//A     | nonsynonymous | 0 | 1 |
| CCNB3     | chrX  | 50090672/C//T     | synonymous    | 0 | 1 |
| IGSF1     | chrX  | 130419222/G//A    | nonsynonymous | 0 | 1 |
| FLNA      | chrX  | 153587681/G//A    | synonymous    | 0 | 1 |
| PRDM16    | chr1  | 3328111/T//C      | synonymous    | 0 | 1 |
| ERICH3    | chr1  | 75038849/T//C     | nonsynonymous | 0 | 1 |
| ADAR      | chr1  | 154562723/T//A    | synonymous    | 0 | 1 |
| KLF7      | chr2  | 207945886/G//A    | synonymous    | 0 | 1 |
| CHRD      | chr3  | 184099086/T//G    | nonsynonymous | 0 | 1 |
| ETFDH     | chr4  | 159620273/T//C    | synonymous    | 0 | 1 |
| F12       | chr5  | 176831638/C//T    | nonsynonymous | 0 | 1 |
| DPCR1     | chr6  | 30918017/G//C     | nonsynonymous | 0 | 1 |
| DPCR1     | chr6  | 30918020/G//A     | synonymous    | 0 | 1 |
| RECQL4    | chr8  | 145738082/G//A    | nonsynonymous | 0 | 1 |
| FAM208B   | chr10 | 5805045/T//C      | synonymous    | 0 | 1 |
| PPRC1     | chr10 | 103900431/C//G    | nonsynonymous | 0 | 1 |
| LRP4      | chr11 | 46911611/T//C     | nonsynonymous | 0 | 1 |
| CEP295    | chr11 | 93430558/G//T     | nonsynonymous | 0 | 1 |
| FRY       | chr13 | 32869430/C//A     | nonsynonymous | 0 | 1 |
| KRTAP10-8 | chr21 | 46032704/T//C     | synonymous    | 0 | 1 |
| ARHGEF6   | chrX  | 135750333/G//C    | synonymous    | 0 | 1 |
| MIB2      | chr1  | 1560204/C//T      | nonsynonymous | 0 | 1 |
| HMGCL     | chr1  | 24134657/G//T     | nonsynonymous | 0 | 1 |
| VANGL1    | chr1  | 116227966/G//C    | nonsynonymous | 0 | 1 |
| IGSF3     | chr1  | 117156796/C//T    | synonymous    | 0 | 1 |
| HIST2H2BF | chr1  | 149783907/T//A    | synonymous    | 0 | 1 |
| MPZ       | chr1  | 161275569/G//A    | synonymous    | 0 | 1 |
| GREB1     | chr2  | 11720839/C//T     | nonsynonymous | 0 | 1 |
| AGBL5     | chr2  | 27282095/C//T     | nonsynonymous | 0 | 1 |
| GALNT14   | chr2  | 31165136/C//T     | nonsynonymous | 0 | 1 |
| SIX3      | chr2  | 45169522/C//T     | synonymous    | 0 | 1 |
| QARS      | chr3  | 49139136/C//T     | nonsynonymous | 0 | 1 |
| XRN1      | chr3  | 142137350/ATAC//A | nonsynonymous | 0 | 1 |
| KIAA0232  | chr4  | 6865370/C//T      | synonymous    | 0 | 1 |
| RAB28     | chr4  | 13378248/T//G     | nonsynonymous | 0 | 1 |
| ADGRL3    | chr4  | 62936159/A//G     | nonsynonymous | 0 | 1 |
| TDO2      | chr4  | 156837016/G//A    | nonsynonymous | 0 | 1 |
| IL7R      | chr5  | 35876479/G//C     | nonsynonymous | 0 | 1 |
| RICTOR    | chr5  | 38945012/C//T     | synonymous    | 0 | 1 |
| IPO11     | chr5  | 61822020/C//T     | nonsynonymous | 0 | 1 |
| HNRNPAB   | chr5  | 177637232/C//T    | nonsynonymous | 0 | 1 |
| SYCP2L    | chr6  | 10956394/A//G     | synonymous    | 0 | 1 |
| RGL2      | chr6  | 33261072/C//T     | nonsynonymous | 0 | 1 |
| EYS       | chr6  | 65301401/G//A     | synonymous    | 0 | 1 |
| FAXC      | chr6  | 99796976/G//A     | synonymous    | 0 | 1 |
| ABCB5     | chr7  | 20721273/C//T     | nonsynonymous | 0 | 1 |
| NACAD     | chr7  | 45120762/A//T     | nonsynonymous | 0 | 1 |
| GRM3      | chr7  | 86416012/G//A     | nonsynonymous | 0 | 1 |
| ADCK5     | chr8  | 145603132/G//A    | synonymous    | 0 | 1 |
| C9orf170  | chr9  | 89771645/A//G     | nonsynonymous | 0 | 1 |
| GOLGA2    | chr9  | 131038214/C//T    | synonymous    | 0 | 1 |
| HBB       | chr11 | 5248295/C//A      | synonymous    | 0 | 1 |
| CHST1     | chr11 | 45671853/C//T     | synonymous    | 0 | 1 |
| SLC22A12  | chr11 | 64368987/G//A     | synonymous    | 0 | 1 |
| NRXN2     | chr11 | 64480524/G//A     | synonymous    | 0 | 1 |
| STRAP     | chr12 | 16035611/C//T     | synonymous    | 0 | 1 |
| GYS2      | chr12 | 21692213/C//T     | synonymous    | 0 | 1 |
| TUBA1B    | chr12 | 49522666/C//T     | nonsynonymous | 0 | 1 |
| SOAT2     | chr12 | 53517620/A//G     | nonsynonymous | 0 | 1 |
| PPFIA2    | chr12 | 81741421/A//C     | nonsynonymous | 0 | 1 |
| SLITRK5   | chr13 | 88328471/C//T     | synonymous    | 0 | 1 |
| IRS2      | chr13 | 110436459/C//T    | nonsynonymous | 0 | 1 |
| AK7       | chr14 | 96909081/C//T     | synonymous    | 0 | 1 |
| KLC1      | chr14 | 104123917/TG//T   | nonsynonymous | 0 | 1 |
| CALML4    | chr15 | 68491996/A//G     | nonsynonymous | 0 | 1 |
| ZNF768    | chr16 | 30537217/C//G     | nonsynonymous | 0 | 1 |
| SLC9A5    | chr16 | 67300126/C//G     | nonsynonymous | 0 | 1 |
|           | chr17 | 7121584/A//G      | synonymous    | 0 | 1 |
| TP53      | chr17 | 7577124/C//CTT    | nonsynonymous | 0 | 1 |

|           |       |                |               |   |   |
|-----------|-------|----------------|---------------|---|---|
| NCOR1     | chr17 | 16004608/C//G  | synonymous    | 0 | 1 |
| HOXB3     | chr17 | 46627821/G//A  | nonsynonymous | 0 | 1 |
| CD300A    | chr17 | 72469865/C//A  | synonymous    | 0 | 1 |
| NT5C      | chr17 | 73126588/C//T  | nonsynonymous | 0 | 1 |
| CDH2      | chr18 | 25582977/G//T  | nonsynonymous | 0 | 1 |
| ST8SIA3   | chr18 | 55024422/C//T  | nonsynonymous | 0 | 1 |
| CHAF1A    | chr19 | 4442261A//G    | nonsynonymous | 0 | 1 |
| ZNF700    | chr19 | 12058103/C//G  | nonsynonymous | 0 | 1 |
| TEAD2     | chr19 | 49858459/G//A  | nonsynonymous | 0 | 1 |
| ZNF583    | chr19 | 56935224/G//C  | nonsynonymous | 0 | 1 |
| ZNF835    | chr19 | 57176313/G//A  | nonsynonymous | 0 | 1 |
| ABHD12    | chr20 | 25288635/G//A  | synonymous    | 0 | 1 |
| TPX2      | chr20 | 30363766/C//A  | nonsynonymous | 0 | 1 |
| NCOA6     | chr20 | 33329429/G//C  | nonsynonymous | 0 | 1 |
| MYH7B     | chr20 | 33576054/C//A  | nonsynonymous | 0 | 1 |
| KRTAP10-9 | chr21 | 46047670A//G   | synonymous    | 0 | 1 |
| DRICH1    | chr22 | 23967083/T//C  | synonymous    | 0 | 1 |
| CSDC2     | chr22 | 41967840/C//G  | synonymous    | 0 | 1 |
| MAMLD1    | chrX  | 149639020/C//T | nonsynonymous | 0 | 1 |
| STARD7    | chr2  | 96852993A//G   | nonsynonymous | 0 | 1 |
| SPSB2     | chr12 | 6981758/T//C   | nonsynonymous | 0 | 1 |
| MAD2L2    | chr1  | 11735727/G//A  | synonymous    | 0 | 1 |
| KLHDC7A   | chr1  | 18808363/T//C  | synonymous    | 0 | 1 |
| ALPL      | chr1  | 21887209/C//A  | nonsynonymous | 0 | 1 |
| ARID1A    | chr1  | 27106536/G//A  | nonsynonymous | 0 | 1 |
| CSMD2     | chr1  | 34128578/C//T  | synonymous    | 0 | 1 |
| DENND2C   | chr1  | 115143437/T//G | synonymous    | 0 | 1 |
| ATP1A1    | chr1  | 116940535/G//A | nonsynonymous | 0 | 1 |
| CD1C      | chr1  | 158262140/T//C | nonsynonymous | 0 | 1 |
| OR10K2    | chr1  | 158390331/C//A | nonsynonymous | 0 | 1 |
| LY9       | chr1  | 160793466/C//T | synonymous    | 0 | 1 |
| RXRG      | chr1  | 165376098/C//A | nonsynonymous | 0 | 1 |
| FMO3      | chr1  | 171077224A//T  | synonymous    | 0 | 1 |
| PAPPA2    | chr1  | 176564001/G//C | nonsynonymous | 0 | 1 |
| F13B      | chr1  | 197031053/T//C | synonymous    | 0 | 1 |
| ADORA1    | chr1  | 203134525/G//A | nonsynonymous | 0 | 1 |
| RASSF5    | chr1  | 206711531/G//A | nonsynonymous | 0 | 1 |
|           | chr1  | 215179287/G//T | synonymous    | 0 | 1 |
| USH2A     | chr1  | 216262483/T//G | nonsynonymous | 0 | 1 |
| ESRRG     | chr1  | 216850659/G//A | synonymous    | 0 | 1 |
| DNAH14    | chr1  | 225548376/T//A | synonymous    | 0 | 1 |
| ACTN2     | chr1  | 236917258/C//T | synonymous    | 0 | 1 |
| RYR2      | chr1  | 237580416A//C  | synonymous    | 0 | 1 |
| WDR64     | chr1  | 241964434/G//A | nonsynonymous | 0 | 1 |
| EFR3B     | chr2  | 25361930/C//T  | synonymous    | 0 | 1 |
| SRBD1     | chr2  | 45645611A//G   | synonymous    | 0 | 1 |
| FER1L5    | chr2  | 97327433A//T   | nonsynonymous | 0 | 1 |
| ZAP70     | chr2  | 98354343/G//A  | nonsynonymous | 0 | 1 |
| SH3RF3    | chr2  | 110036026/C//T | nonsynonymous | 0 | 1 |
| MARCO     | chr2  | 119735509/C//A | nonsynonymous | 0 | 1 |
| HS6ST1    | chr2  | 129025861/G//A | nonsynonymous | 0 | 1 |
| LRP1B     | chr2  | 141474353A//C  | nonsynonymous | 0 | 1 |
| SCN3A     | chr2  | 166010980/C//A | nonsynonymous | 0 | 1 |
| XIRP2     | chr2  | 167760150/C//G | nonsynonymous | 0 | 1 |
| LRP2      | chr2  | 170148849/G//C | nonsynonymous | 0 | 1 |
| TTN       | chr2  | 179411203/G//C | nonsynonymous | 0 | 1 |
| TTN       | chr2  | 179517245/C//A | nonsynonymous | 0 | 1 |
| TTN       | chr2  | 179604859/C//T | synonymous    | 0 | 1 |
| CTLA4     | chr2  | 204735510/C//T | nonsynonymous | 0 | 1 |
| ABCA12    | chr2  | 215901721/T//A | nonsynonymous | 0 | 1 |
| OBSL1     | chr2  | 220422558/G//A | synonymous    | 0 | 1 |
| SNED1     | chr2  | 242009413/C//T | nonsynonymous | 0 | 1 |
| CHL1      | chr3  | 367653/C//A    | nonsynonymous | 0 | 1 |
| CHL1      | chr3  | 407651/T//A    | nonsynonymous | 0 | 1 |
| TADA3     | chr3  | 9831547/T//A   | nonsynonymous | 0 | 1 |
| IL17RE    | chr3  | 9957221/C//T   | synonymous    | 0 | 1 |
| KCNH8     | chr3  | 19554722A//T   | nonsynonymous | 0 | 1 |
| KCNH8     | chr3  | 19554726/G//T  | nonsynonymous | 0 | 1 |
| UBE2E1    | chr3  | 23932001/C//T  | synonymous    | 0 | 1 |
| KIF9      | chr3  | 47277620A//G   | synonymous    | 0 | 1 |

|          |       |                |               |   |   |
|----------|-------|----------------|---------------|---|---|
| ROBO2    | chr3  | 77614097/C//T  | synonymous    | 0 | 1 |
| HTR1F    | chr3  | 88040708/C//A  | nonsynonymous | 0 | 1 |
| OR5K4    | chr3  | 98073425/C//A  | nonsynonymous | 0 | 1 |
| CD200R1  | chr3  | 112647756/T//G | nonsynonymous | 0 | 1 |
| GPR156   | chr3  | 119886815/G//T | nonsynonymous | 0 | 1 |
| EPHB1    | chr3  | 134851558/G//A | nonsynonymous | 0 | 1 |
| ANKUB1   | chr3  | 149485255/C//T | synonymous    | 0 | 1 |
| WFS1     | chr4  | 6302839/T//A   | nonsynonymous | 0 | 1 |
| CC2D2A   | chr4  | 15511774/G//A  | nonsynonymous | 0 | 1 |
| RBPJ     | chr4  | 26430416/A//G  | synonymous    | 0 | 1 |
| ARHGAP24 | chr4  | 86893204/C//G  | nonsynonymous | 0 | 1 |
| ZGRF1    | chr4  | 113506819/C//G | nonsynonymous | 0 | 1 |
| ANK2     | chr4  | 114120177/C//A | nonsynonymous | 0 | 1 |
| ANK2     | chr4  | 114262959/C//A | nonsynonymous | 0 | 1 |
| PCDH10   | chr4  | 134073712/A//C | nonsynonymous | 0 | 1 |
| POU4F2   | chr4  | 147561590/A//G | nonsynonymous | 0 | 1 |
| DCLK2    | chr4  | 151168779/C//A | synonymous    | 0 | 1 |
| FBXW7    | chr4  | 153245404/G//C | nonsynonymous | 0 | 1 |
| GALNTL6  | chr4  | 173269747/A//C | nonsynonymous | 0 | 1 |
| DNAH5    | chr5  | 13753353/T//A  | nonsynonymous | 0 | 1 |
| NPR3     | chr5  | 32712350/G//A  | synonymous    | 0 | 1 |
| ESM1     | chr5  | 54275199/G//A  | synonymous    | 0 | 1 |
| IQGAP2   | chr5  | 75950778/T//A  | nonsynonymous | 0 | 1 |
| APC      | chr5  | 112155032/A//T | nonsynonymous | 0 | 1 |
| FTMT     | chr5  | 121187824/C//A | synonymous    | 0 | 1 |
| PCDHB15  | chr5  | 140626994/C//T | synonymous    | 0 | 1 |
| PCDHGA10 | chr5  | 140793243/C//T | synonymous    | 0 | 1 |
| TIGD6    | chr5  | 149375015/C//T | synonymous    | 0 | 1 |
| MRPL22   | chr5  | 154339607/T//A | nonsynonymous | 0 | 1 |
| GABRB2   | chr5  | 160721398/T//C | nonsynonymous | 0 | 1 |
| DOCK2    | chr5  | 169445988/C//A | nonsynonymous | 0 | 1 |
| GMDS     | chr6  | 1742775/T//C   | nonsynonymous | 0 | 1 |
| HLA-A    | chr6  | 29911321/G//T  | nonsynonymous | 0 | 1 |
| UNC5CL   | chr6  | 41002489/C//G  | nonsynonymous | 0 | 1 |
| DEFB113  | chr6  | 49936451/G//A  | nonsynonymous | 0 | 1 |
| EYS      | chr6  | 65301875/T//G  | nonsynonymous | 0 | 1 |
| COL12A1  | chr6  | 75847298/G//T  | synonymous    | 0 | 1 |
| EPHA7    | chr6  | 94120608/G//T  | nonsynonymous | 0 | 1 |
| ASCC3    | chr6  | 101127562/T//G | nonsynonymous | 0 | 1 |
| SYNE1    | chr6  | 152473245/G//A | nonsynonymous | 0 | 1 |
| PLG      | chr6  | 161155096/G//A | nonsynonymous | 0 | 1 |
| AMPH     | chr7  | 38574608/G//A  | nonsynonymous | 0 | 1 |
| ADCY1    | chr7  | 45743024/G//A  | nonsynonymous | 0 | 1 |
| HEPACAM2 | chr7  | 92848743/A//G  | nonsynonymous | 0 | 1 |
| COL1A2   | chr7  | 94033901/G//T  | nonsynonymous | 0 | 1 |
| FBXL13   | chr7  | 102665681/C//T | synonymous    | 0 | 1 |
| CADPS2   | chr7  | 122261662/G//A | nonsynonymous | 0 | 1 |
| GRM8     | chr7  | 126086408/T//G | nonsynonymous | 0 | 1 |
| KEL      | chr7  | 142658568/C//T | synonymous    | 0 | 1 |
| ZNF862   | chr7  | 149547424/T//A | nonsynonymous | 0 | 1 |
| TMUB1    | chr7  | 150778577/G//A | synonymous    | 0 | 1 |
| AGAP3    | chr7  | 150815406/C//T | synonymous    | 0 | 1 |
| CSMD1    | chr8  | 2820133/G//A   | synonymous    | 0 | 1 |
| UNC5D    | chr8  | 35608327/G//T  | nonsynonymous | 0 | 1 |
| SFRP1    | chr8  | 41166478/C//A  | synonymous    | 0 | 1 |
| PRKDC    | chr8  | 48824969/C//T  | nonsynonymous | 0 | 1 |
| PXDNL    | chr8  | 52505201/T//G  | nonsynonymous | 0 | 1 |
| ATP6V1H  | chr8  | 54628532/G//A  | nonsynonymous | 0 | 1 |
| ASPH     | chr8  | 62479779/T//C  | synonymous    | 0 | 1 |
| C8orf46  | chr8  | 67417720/G//A  | synonymous    | 0 | 1 |
| FER1L6   | chr8  | 124992839/G//A | nonsynonymous | 0 | 1 |
| FAM135B  | chr8  | 139255226/A//C | nonsynonymous | 0 | 1 |
| CCDC166  | chr8  | 144789984/C//T | nonsynonymous | 0 | 1 |
| NOL6     | chr9  | 33472321/G//A  | synonymous    | 0 | 1 |
| RNF20    | chr9  | 104323504/C//T | nonsynonymous | 0 | 1 |
| C9orf50  | chr9  | 132382719/G//A | synonymous    | 0 | 1 |
| COL5A1   | chr9  | 137591774/C//A | nonsynonymous | 0 | 1 |
| TRAF2    | chr9  | 139811067/G//A | synonymous    | 0 | 1 |
| SFMBT2   | chr10 | 7205784/C//A   | nonsynonymous | 0 | 1 |
| ITIH2    | chr10 | 7763613/C//T   | nonsynonymous | 0 | 1 |

|          |       |                |               |   |   |
|----------|-------|----------------|---------------|---|---|
| ST8SIA6  | chr10 | 17365142/G//A  | nonsynonymous | 0 | 1 |
| CHAT     | chr10 | 50822475/G//A  | synonymous    | 0 | 1 |
|          | chr10 | 55583193/G//C  | synonymous    | 0 | 1 |
| TFAM     | chr10 | 60154773/G//A  | nonsynonymous | 0 | 1 |
| NOLC1    | chr10 | 103921417/A//G | nonsynonymous | 0 | 1 |
| GFRA1    | chr10 | 118029084/C//A | nonsynonymous | 0 | 1 |
| KNDC1    | chr10 | 135020825/C//T | nonsynonymous | 0 | 1 |
| OR51L1   | chr11 | 5021063/T//G   | nonsynonymous | 0 | 1 |
| OR52A1   | chr11 | 5172828/C//A   | nonsynonymous | 0 | 1 |
| AMPD3    | chr11 | 10503746/C//T  | nonsynonymous | 0 | 1 |
| OR10AG1  | chr11 | 55735262/A//C  | synonymous    | 0 | 1 |
| FAT3     | chr11 | 92088309/C//T  | nonsynonymous | 0 | 1 |
| MTNR1B   | chr11 | 92715424/G//C  | synonymous    | 0 | 1 |
| DSCAML1  | chr11 | 117307909/C//T | nonsynonymous | 0 | 1 |
| IGSF9B   | chr11 | 133790944/C//T | synonymous    | 0 | 1 |
| KRAS     | chr12 | 25398285/C//G  | nonsynonymous | 0 | 1 |
| LRRK2    | chr12 | 40702389/A//T  | synonymous    | 0 | 1 |
| NELL2    | chr12 | 45108499/G//A  | synonymous    | 0 | 1 |
| AMIGO2   | chr12 | 47472836/C//G  | synonymous    | 0 | 1 |
| NT5DC3   | chr12 | 104187022/G//A | synonymous    | 0 | 1 |
| BTBD11   | chr12 | 107914351/C//T | nonsynonymous | 0 | 1 |
| CUX2     | chr12 | 111748069/G//T | nonsynonymous | 0 | 1 |
| KDM2B    | chr12 | 121880605/G//A | nonsynonymous | 0 | 1 |
| HIP1R    | chr12 | 123343709/C//T | nonsynonymous | 0 | 1 |
| FZD10    | chr12 | 130648815/G//A | nonsynonymous | 0 | 1 |
| PIWIL1   | chr12 | 130840137/G//T | nonsynonymous | 0 | 1 |
| SACS     | chr13 | 23929780/T//G  | nonsynonymous | 0 | 1 |
| CCNA1    | chr13 | 37012228/C//T  | nonsynonymous | 0 | 1 |
| THSD1    | chr13 | 52952261/C//A  | nonsynonymous | 0 | 1 |
|          | chr13 | 78493594/A//C  | synonymous    | 0 | 1 |
| MCF2L    | chr13 | 113742087/G//A | nonsynonymous | 0 | 1 |
| ATP4B    | chr13 | 114307232/C//T | nonsynonymous | 0 | 1 |
| MYH7     | chr14 | 23884312/C//T  | synonymous    | 0 | 1 |
| RTN1     | chr14 | 60194232/G//A  | synonymous    | 0 | 1 |
| SIX6     | chr14 | 60976504/C//G  | nonsynonymous | 0 | 1 |
| TSHR     | chr14 | 81609501/G//T  | nonsynonymous | 0 | 1 |
| STON2    | chr14 | 81862474/G//A  | nonsynonymous | 0 | 1 |
| RYR3     | chr15 | 33938601/C//T  | nonsynonymous | 0 | 1 |
| OIP5     | chr15 | 41605468/T//G  | synonymous    | 0 | 1 |
| MAP1A    | chr15 | 43814174/G//A  | nonsynonymous | 0 | 1 |
| SMAD3    | chr15 | 67479795/C//T  | nonsynonymous | 0 | 1 |
| SPESP1   | chr15 | 69223037/G//A  | synonymous    | 0 | 1 |
| ZNF423   | chr16 | 49671686/G//A  | synonymous    | 0 | 1 |
| PAPD5    | chr16 | 50261799/C//T  | nonsynonymous | 0 | 1 |
| NFAT5    | chr16 | 69726407/G//A  | synonymous    | 0 | 1 |
| LDHD     | chr16 | 75149198/C//T  | synonymous    | 0 | 1 |
| PKD1L2   | chr16 | 81134713/G//A  | synonymous    | 0 | 1 |
| PAFAH1B1 | chr17 | 2570317/C//A   | nonsynonymous | 0 | 1 |
| TP53     | chr17 | 7577520/A//C   | nonsynonymous | 0 | 1 |
| ACACA    | chr17 | 35687345/C//T  | synonymous    | 0 | 1 |
| GPR179   | chr17 | 36486308/G//A  | synonymous    | 0 | 1 |
| TUBD1    | chr17 | 57955630/G//A  | synonymous    | 0 | 1 |
| MGAT5B   | chr17 | 74902155/G//A  | nonsynonymous | 0 | 1 |
| NETO1    | chr18 | 70417579/A//G  | nonsynonymous | 0 | 1 |
| STXBP2   | chr19 | 7703933/G//A   | nonsynonymous | 0 | 1 |
| MUC16    | chr19 | 9058790/A//T   | synonymous    | 0 | 1 |
| DOCK6    | chr19 | 11327936/G//A  | nonsynonymous | 0 | 1 |
| ANGPTL8  | chr19 | 11350332/T//G  | nonsynonymous | 0 | 1 |
| ZNF844   | chr19 | 12186726/G//C  | nonsynonymous | 0 | 1 |
| ZNF20    | chr19 | 12244163/C//A  | nonsynonymous | 0 | 1 |
| DNASE2   | chr19 | 12986962/C//T  | nonsynonymous | 0 | 1 |
| CACNA1A  | chr19 | 13394176/G//A  | nonsynonymous | 0 | 1 |
| USHBP1   | chr19 | 17369094/T//G  | nonsynonymous | 0 | 1 |
| MAP1S    | chr19 | 17838795/C//T  | nonsynonymous | 0 | 1 |
| HAPLN4   | chr19 | 19368852/G//A  | nonsynonymous | 0 | 1 |
| ZNF536   | chr19 | 30934917/C//T  | nonsynonymous | 0 | 1 |
| RHPN2    | chr19 | 33481468/G//A  | synonymous    | 0 | 1 |
| WTIP     | chr19 | 34973365/C//T  | synonymous    | 0 | 1 |
| LRFN3    | chr19 | 36435648/G//A  | synonymous    | 0 | 1 |
| SELENOV  | chr19 | 40006100/G//A  | nonsynonymous | 0 | 1 |

|              |       |                 |               |   |   |
|--------------|-------|-----------------|---------------|---|---|
| CNTD2        | chr19 | 40729317/G//A   | nonsynonymous | 0 | 1 |
| SPTBN4       | chr19 | 40996147/C//T   | nonsynonymous | 0 | 1 |
| SPHK2        | chr19 | 49129596/G//T   | nonsynonymous | 0 | 1 |
| NTN5         | chr19 | 49173642/G//T   | nonsynonymous | 0 | 1 |
| VSIG10L      | chr19 | 51841274/C//T   | nonsynonymous | 0 | 1 |
| ZNF611       | chr19 | 53209907/T//C   | nonsynonymous | 0 | 1 |
| ZNF816       | chr19 | 53453169/G//C   | nonsynonymous | 0 | 1 |
| VPS16        | chr20 | 2842500/C//T    | nonsynonymous | 0 | 1 |
| LBP          | chr20 | 36997684/G//T   | nonsynonymous | 0 | 1 |
| PABPC1L      | chr20 | 43566719/C//T   | nonsynonymous | 0 | 1 |
|              | chr21 | 35209291/G//C   | synonymous    | 0 | 1 |
| RUNX1        | chr21 | 36164821/C//T   | nonsynonymous | 0 | 1 |
| DSCAM        | chr21 | 41684059/C//A   | nonsynonymous | 0 | 1 |
| APOBEC3G     | chr22 | 39475008/G//A   | nonsynonymous | 0 | 1 |
| TAB1         | chr22 | 39813809/G//A   | nonsynonymous | 0 | 1 |
| PKDREJ       | chr22 | 46657020/G//C   | nonsynonymous | 0 | 1 |
| DMD          | chrX  | 31792079/T//A   | nonsynonymous | 0 | 1 |
| HUWE1        | chrX  | 53622245/C//T   | synonymous    | 0 | 1 |
| PJA1         | chrX  | 68382826/C//A   | nonsynonymous | 0 | 1 |
| TEX13B       | chrX  | 107225289/C//A  | nonsynonymous | 0 | 1 |
| KIAA1210     | chrX  | 118220565/T//A  | nonsynonymous | 0 | 1 |
| KIAA1210     | chrX  | 118223438/C//T  | synonymous    | 0 | 1 |
| PANK4        | chr1  | 2458010/G//T    | nonsynonymous | 1 | 0 |
| GLMP         | chr1  | 156264693/C//G  | nonsynonymous | 1 | 0 |
| BRINP2       | chr1  | 177199032/C//A  | nonsynonymous | 1 | 0 |
| CACNA1S      | chr1  | 201047035/G//A  | nonsynonymous | 1 | 0 |
| OBSCN        | chr1  | 228495974/G//A  | nonsynonymous | 1 | 0 |
| ALK          | chr2  | 29917871/C//T   | nonsynonymous | 1 | 0 |
| RTN4         | chr2  | 55253892/G//A   | nonsynonymous | 1 | 0 |
| POLR1A       | chr2  | 86332948/C//G   | synonymous    | 1 | 0 |
| THSD7B       | chr2  | 138400105/G//T  | nonsynonymous | 1 | 0 |
| TADA3        | chr3  | 9821952/C//A    | synonymous    | 1 | 0 |
| TGM4         | chr3  | 44948677/T//C   | nonsynonymous | 1 | 0 |
| CCR3         | chr3  | 46307474/G//A   | synonymous    | 1 | 0 |
| PRSS46       | chr3  | 46775651/G//A   | nonsynonymous | 1 | 0 |
| HTT          | chr4  | 3205840/C//T    | nonsynonymous | 1 | 0 |
| PRDM8        | chr4  | 81123543/C//T   | synonymous    | 1 | 0 |
| TDO2         | chr4  | 156838615/C//A  | nonsynonymous | 1 | 0 |
| SLC36A2      | chr5  | 150722499/T//G  | synonymous    | 1 | 0 |
| RANBP17      | chr5  | 170610431/C//A  | nonsynonymous | 1 | 0 |
| LOC100129636 | chr6  | 29044208/G//A   | synonymous    | 1 | 0 |
| LST1         | chr6  | 31555071/G//C   | synonymous    | 1 | 0 |
| CYP39A1      | chr6  | 46563742/C//A   | synonymous    | 1 | 0 |
|              | chr6  | 56482136/T//G   | synonymous    | 1 | 0 |
| PNISR        | chr6  | 99848395/C//G   | synonymous    | 1 | 0 |
| TAAR5        | chr6  | 132910335/G//A  | nonsynonymous | 1 | 0 |
| TNRC18       | chr7  | 5427992/T//G    | nonsynonymous | 1 | 0 |
| THSD7A       | chr7  | 11441461/G//A   | synonymous    | 1 | 0 |
| CHN2         | chr7  | 29394262/C//T   | nonsynonymous | 1 | 0 |
| PPP1R17      | chr7  | 31746967/G//T   | synonymous    | 1 | 0 |
| PKD1L1       | chr7  | 47944794/T//C   | nonsynonymous | 1 | 0 |
| PEX1         | chr7  | 92120639/A//T   | nonsynonymous | 1 | 0 |
| DNAJC2       | chr7  | 102964073/C//A  | nonsynonymous | 1 | 0 |
| EFCAB10      | chr7  | 105205609/T//TG | synonymous    | 1 | 0 |
| ATP6V1H      | chr8  | 54723717/T//C   | synonymous    | 1 | 0 |
| LACTB2       | chr8  | 71581325/G//C   | nonsynonymous | 1 | 0 |
| LAPTM4B      | chr8  | 98831390/A//C   | nonsynonymous | 1 | 0 |
| ANP32B       | chr9  | 100774709/G//A  | nonsynonymous | 1 | 0 |
| OR1Q1        | chr9  | 125377624/G//T  | nonsynonymous | 1 | 0 |
| MVB12B       | chr9  | 129102902/A//G  | nonsynonymous | 1 | 0 |
| SAPCD2       | chr9  | 139959140/C//T  | nonsynonymous | 1 | 0 |
| PNPLA7       | chr9  | 140392676/G//C  | synonymous    | 1 | 0 |
| CALML5       | chr10 | 5541148/A//G    | nonsynonymous | 1 | 0 |
| VSTM4        | chr10 | 50315995/A//C   | nonsynonymous | 1 | 0 |
| ANK3         | chr10 | 61822912/T//A   | nonsynonymous | 1 | 0 |
| HHEX         | chr10 | 94452138/C//A   | synonymous    | 1 | 0 |
| COX15        | chr10 | 101478178/G//C  | nonsynonymous | 1 | 0 |
| CPXM2        | chr10 | 125601920/G//T  | synonymous    | 1 | 0 |
| FSHB         | chr11 | 30255167/C//A   | synonymous    | 1 | 0 |
| OR4C46       | chr11 | 51515417/A//T   | nonsynonymous | 1 | 0 |

|           |       |                           |               |   |   |
|-----------|-------|---------------------------|---------------|---|---|
| SSRP1     | chr11 | 57099876/A//G             | synonymous    | 1 | 0 |
| SYVN1     | chr11 | 64898270/GCCGCTGGAA//G    | nonsynonymous | 1 | 0 |
| SHANK2    | chr11 | 70333519/G//C             | nonsynonymous | 1 | 0 |
| KDM5A     | chr12 | 420128/C//A               | nonsynonymous | 1 | 0 |
| A2M       | chr12 | 9262457/C//G              | synonymous    | 1 | 0 |
| LRP6      | chr12 | 12274312/T//C             | synonymous    | 1 | 0 |
|           | chr12 | 16757897/G//A             | synonymous    | 1 | 0 |
| OR6C70    | chr12 | 55863565/G//A             | nonsynonymous | 1 | 0 |
| POC1B     | chr12 | 89918934/G//A             | synonymous    | 1 | 0 |
| DIABLO    | chr12 | 122702952/A//G            | synonymous    | 1 | 0 |
| POLE      | chr12 | 133202856/G//C            | nonsynonymous | 1 | 0 |
| ANKLE2    | chr12 | 133313503/G//T            | nonsynonymous | 1 | 0 |
| RXFP2     | chr13 | 32356838/T//A             | nonsynonymous | 1 | 0 |
| SLITRK5   | chr13 | 88329811/C//A             | nonsynonymous | 1 | 0 |
| STARD9    | chr15 | 42979501/C//G             | nonsynonymous | 1 | 0 |
| TMC7      | chr16 | 19049350/C//T             | nonsynonymous | 1 | 0 |
| NLRC5     | chr16 | 57056185/G//C             | nonsynonymous | 1 | 0 |
| CNGB1     | chr16 | 57921976/C//T             | nonsynonymous | 1 | 0 |
| PLCG2     | chr16 | 81891927/G//A             | nonsynonymous | 1 | 0 |
| COASY     | chr17 | 40717746/A//C             | nonsynonymous | 1 | 0 |
| DHX8      | chr17 | 41584964/G//T             | nonsynonymous | 1 | 0 |
| EPN3      | chr17 | 48614006/A//G             | nonsynonymous | 1 | 0 |
| TSPAN10   | chr17 | 79612227/C//G             | synonymous    | 1 | 0 |
| DSC1      | chr18 | 28742522/G//A             | synonymous    | 1 | 0 |
| SETBP1    | chr18 | 42532265/G//T             | nonsynonymous | 1 | 0 |
| SERPIN2   | chr18 | 61570162/C//G             | nonsynonymous | 1 | 0 |
| DSEL      | chr18 | 65181902/T//A             | synonymous    | 1 | 0 |
|           | chr19 | 36001410/G//T             | synonymous    | 1 | 0 |
| SPTBN4    | chr19 | 41063070/G//A             | nonsynonymous | 1 | 0 |
| GYS1      | chr19 | 49473097/G//T             | nonsynonymous | 1 | 0 |
| ZNF813    | chr19 | 53995084/A//C             | nonsynonymous | 1 | 0 |
| ZNF773    | chr19 | 58018506/A//G             | nonsynonymous | 1 | 0 |
| ZNF417    | chr19 | 58419841/G//T             | synonymous    | 1 | 0 |
| ZNF417    | chr19 | 58419874/T//C             | synonymous    | 1 | 0 |
|           | chr20 | 35414974/T//C             | synonymous    | 1 | 0 |
| NCOA5     | chr20 | 44708043/T//C             | synonymous    | 1 | 0 |
| SALL4     | chr20 | 50408326/G//A             | synonymous    | 1 | 0 |
| NTSR1     | chr20 | 61391627/G//C             | synonymous    | 1 | 0 |
| C21orf59  | chr21 | 33984548/AACCATGGCGGTCCCI | nonsynonymous | 1 | 0 |
| TOB2      | chr22 | 41832941/C//T             | nonsynonymous | 1 | 0 |
| MAGEB4    | chrX  | 30260774/C//G             | nonsynonymous | 1 | 0 |
| CFAP47    | chrX  | 35969974/A//G             | nonsynonymous | 1 | 0 |
| TRPC5     | chrX  | 111155645/T//G            | nonsynonymous | 1 | 0 |
| BCORL1    | chrX  | 129190186/G//A            | synonymous    | 1 | 0 |
| CPSF3L    | chr1  | 1249718/G//A              | nonsynonymous | 0 | 1 |
| CTPS1     | chr1  | 41456915/G//A             | nonsynonymous | 0 | 1 |
| ZNF678    | chr1  | 227842469/A//T            | nonsynonymous | 0 | 1 |
| CPOX      | chr3  | 98312301/C//T             | synonymous    | 0 | 1 |
| CEP63     | chr3  | 134256054/G//A            | nonsynonymous | 0 | 1 |
| APC       | chr5  | 112162917/CT//C           | nonsynonymous | 0 | 1 |
| TCP11     | chr6  | 35089892/A//G             | nonsynonymous | 0 | 1 |
| EYS       | chr6  | 65098712/G//A             | synonymous    | 0 | 1 |
| PTPRK     | chr6  | 128302368/G//T            | nonsynonymous | 0 | 1 |
| DNAH11    | chr7  | 21784642/C//T             | nonsynonymous | 0 | 1 |
| OR56A5    | chr11 | 5989028/C//A              | nonsynonymous | 0 | 1 |
| MPPED2    | chr11 | 30439146/G//T             | nonsynonymous | 0 | 1 |
| TRIM64C   | chr11 | 49078797/T//G             | nonsynonymous | 0 | 1 |
| FAT3      | chr11 | 92533838/C//T             | synonymous    | 0 | 1 |
| CEP57     | chr11 | 95546241/G//A             | synonymous    | 0 | 1 |
| USP5      | chr12 | 6966014/C//T              | nonsynonymous | 0 | 1 |
| ARHGEF7   | chr13 | 111767996/C//T            | synonymous    | 0 | 1 |
| SYNE2     | chr14 | 64469455/A//G             | nonsynonymous | 0 | 1 |
| DYNC1H1   | chr14 | 102476243/T//C            | nonsynonymous | 0 | 1 |
| EXOC3L4   | chr14 | 103574836/G//A            | nonsynonymous | 0 | 1 |
| RUNDC3A   | chr17 | 42390005/G//A             | synonymous    | 0 | 1 |
| MRPL38    | chr17 | 73895028/G//A             | nonsynonymous | 0 | 1 |
| TNFAIP8L1 | chr19 | 4652078/T//C              | nonsynonymous | 0 | 1 |
| TSPAN16   | chr19 | 11409609/T//C             | nonsynonymous | 0 | 1 |
| NAPA      | chr19 | 47995335/G//A             | synonymous    | 0 | 1 |
| SIGLEC6   | chr19 | 52033213/G//C             | synonymous    | 0 | 1 |

|          |       |                |               |   |   |
|----------|-------|----------------|---------------|---|---|
| CTSS     | chr1  | 150724280/C//T | nonsynonymous | 0 | 1 |
| VANGL2   | chr1  | 160385686/C//T | nonsynonymous | 0 | 1 |
| SLC26A9  | chr1  | 205895684/C//T | nonsynonymous | 0 | 1 |
| OBSCN    | chr1  | 228482667/G//T | nonsynonymous | 0 | 1 |
| APOB     | chr2  | 21224728/G//A  | synonymous    | 0 | 1 |
| FEZ2     | chr2  | 36818146/T//A  | nonsynonymous | 0 | 1 |
| SATB2    | chr2  | 200137235/T//C | nonsynonymous | 0 | 1 |
| NRP2     | chr2  | 206659485/C//T | synonymous    | 0 | 1 |
| CPS1     | chr2  | 211525284/G//T | nonsynonymous | 0 | 1 |
|          | chr3  | 97367184/A//G  | synonymous    | 0 | 1 |
| CHST2    | chr3  | 142840545/G//A | nonsynonymous | 0 | 1 |
| SHOX2    | chr3  | 157816005/G//C | synonymous    | 0 | 1 |
| TRIO     | chr5  | 14358394/G//C  | nonsynonymous | 0 | 1 |
| TRERF1   | chr6  | 42227245/G//C  | nonsynonymous | 0 | 1 |
| BCLAF1   | chr6  | 136599399/G//T | nonsynonymous | 0 | 1 |
| EPHB6    | chr7  | 142564330/C//T | synonymous    | 0 | 1 |
| EFCAB1   | chr8  | 49647736/C//T  | synonymous    | 0 | 1 |
| MTDH     | chr8  | 98673327/G//C  | nonsynonymous | 0 | 1 |
| KANK1    | chr9  | 712620/A//C    | synonymous    | 0 | 1 |
| CRAT     | chr9  | 131857899/C//T | synonymous    | 0 | 1 |
| GOT1     | chr10 | 101163281/G//A | nonsynonymous | 0 | 1 |
|          | chr11 | 31824419/G//A  | synonymous    | 0 | 1 |
| SMTNL1   | chr11 | 57310324/C//T  | nonsynonymous | 0 | 1 |
| PTPRQ    | chr12 | 81046548/T//A  | nonsynonymous | 0 | 1 |
| ING1     | chr13 | 111367738/T//G | synonymous    | 0 | 1 |
| BFAR     | chr16 | 14748998/C//T  | synonymous    | 0 | 1 |
| NCOR1    | chr17 | 15971361/G//C  | nonsynonymous | 0 | 1 |
| ADAP2    | chr17 | 29283470/C//T  | nonsynonymous | 0 | 1 |
| PTPRM    | chr18 | 7906587/T//C   | synonymous    | 0 | 1 |
| ELAVL1   | chr19 | 8038751/A//C   | synonymous    | 0 | 1 |
| KLC3     | chr19 | 45848934/TG//T | nonsynonymous | 0 | 1 |
| ZXDB     | chrX  | 57618472/G//C  | synonymous    | 0 | 1 |
| IRS4     | chrX  | 107978461/G//A | nonsynonymous | 0 | 1 |
| SPANXN1  | chrX  | 144337254/G//A | nonsynonymous | 0 | 1 |
| MROH9    | chr1  | 170955772/C//G | nonsynonymous | 0 | 1 |
| PXDN     | chr2  | 1667376/C//A   | nonsynonymous | 0 | 1 |
| TTC31    | chr2  | 74710237/A//G  | synonymous    | 0 | 1 |
| UBR3     | chr2  | 170937194/G//C | nonsynonymous | 0 | 1 |
| KBTBD12  | chr3  | 127641985/A//G | synonymous    | 0 | 1 |
| KLHL5    | chr4  | 39098384/A//G  | nonsynonymous | 0 | 1 |
| DDX39B   | chr6  | 31508245/G//A  | nonsynonymous | 0 | 1 |
| TOMM6    | chr6  | 41755403/T//C  | synonymous    | 0 | 1 |
| ASZ1     | chr7  | 117023052/T//C | nonsynonymous | 0 | 1 |
| ERI1     | chr8  | 8860616/G//A   | nonsynonymous | 0 | 1 |
| WWP1     | chr8  | 87439967/G//A  | nonsynonymous | 0 | 1 |
| RAD54B   | chr8  | 95412698/G//A  | synonymous    | 0 | 1 |
| IFNA14   | chr9  | 21239700/C//T  | nonsynonymous | 0 | 1 |
| GRIN3A   | chr9  | 104500150/A//G | nonsynonymous | 0 | 1 |
| CBL      | chr11 | 119156088/C//T | nonsynonymous | 0 | 1 |
| CHD3     | chr17 | 7806315/A//G   | nonsynonymous | 0 | 1 |
| AP2B1    | chr17 | 33998903/A//T  | nonsynonymous | 0 | 1 |
| ADARB1   | chr21 | 46645524/G//A  | synonymous    | 0 | 1 |
| FOXD3    | chr1  | 63789981/C//T  | nonsynonymous | 0 | 1 |
| TTN      | chr2  | 179582010/G//T | nonsynonymous | 0 | 1 |
| TOP2B    | chr3  | 25705730/A//AC | nonsynonymous | 0 | 1 |
| ST3GAL6  | chr3  | 98503879/A//G  | nonsynonymous | 0 | 1 |
| ADAM2    | chr8  | 39679151/C//A  | nonsynonymous | 0 | 1 |
| ZNF408   | chr11 | 46724304/T//C  | synonymous    | 0 | 1 |
| CSRP2    | chr12 | 77257081/G//A  | synonymous    | 0 | 1 |
| PTGER2   | chr14 | 52781651/G//T  | nonsynonymous | 0 | 1 |
| NOXRED1  | chr14 | 77860856/C//A  | synonymous    | 0 | 1 |
| LOXHD1   | chr18 | 44172522/A//G  | nonsynonymous | 0 | 1 |
| MRO      | chr18 | 48325712/G//A  | synonymous    | 0 | 1 |
| SLC2A7   | chr1  | 9063367/A//G   | nonsynonymous | 1 | 0 |
|          | chr1  | 10364222/C//T  | synonymous    | 1 | 0 |
| TESK2    | chr1  | 45813330/G//A  | nonsynonymous | 1 | 0 |
| COL11A1  | chr1  | 103428215/A//G | synonymous    | 1 | 0 |
| TRIM33   | chr1  | 114968100/G//C | nonsynonymous | 1 | 0 |
| TOR1AIP1 | chr1  | 179887116/T//C | synonymous    | 1 | 0 |
| CFHR2    | chr1  | 196928171/G//C | nonsynonymous | 1 | 0 |



|           |       |                           |               |   |   |
|-----------|-------|---------------------------|---------------|---|---|
| KIF14     | chr1  | 200586864/C//T            | nonsynonymous | 1 | 0 |
| THUMP2    | chr2  | 39995585/G//T             | nonsynonymous | 1 | 0 |
| LRP1B     | chr2  | 141812688/T//TGCATGACCC   | nonsynonymous | 1 | 0 |
| ZEB2      | chr2  | 145157244/T//C            | nonsynonymous | 1 | 0 |
| ABCA12    | chr2  | 215862491/C//G            | nonsynonymous | 1 | 0 |
| NBEAL2    | chr3  | 47048739/G//C             | synonymous    | 1 | 0 |
| FAT1      | chr4  | 187542871/T//G            | nonsynonymous | 1 | 0 |
| RP1       | chr8  | 55541514/C//G             | nonsynonymous | 1 | 0 |
| CCDC166   | chr8  | 144790077/C//T            | nonsynonymous | 1 | 0 |
| MURC      | chr9  | 103340578/G//A            | synonymous    | 1 | 0 |
| KYAT1     | chr9  | 131597934/C//T            | nonsynonymous | 1 | 0 |
| ABCA2     | chr9  | 139909224/G//A            | synonymous    | 1 | 0 |
| LRRC27    | chr10 | 134165210/G//A            | synonymous    | 1 | 0 |
| OR52A1    | chr11 | 5172757/G//A              | synonymous    | 1 | 0 |
| DGKZ      | chr11 | 46388098/A//G             | nonsynonymous | 1 | 0 |
| VWCE      | chr11 | 61026214/G//T             | nonsynonymous | 1 | 0 |
| LTBP3     | chr11 | 65314008/G//T             | nonsynonymous | 1 | 0 |
| SPTBN2    | chr11 | 66472646/G//C             | nonsynonymous | 1 | 0 |
| FCHSD2    | chr11 | 72794733/A//T             | synonymous    | 1 | 0 |
| TRIM77    | chr11 | 89443791/A//T             | nonsynonymous | 1 | 0 |
|           | chr11 | 131240661/G//A            | synonymous    | 1 | 0 |
| VWF       | chr12 | 6132880/C//A              | nonsynonymous | 1 | 0 |
| C3AR1     | chr12 | 8211947/C//T              | nonsynonymous | 1 | 0 |
| PABPC3    | chr13 | 25671106/A//G             | nonsynonymous | 1 | 0 |
| FOXA1     | chr14 | 38061458/C//T             | synonymous    | 1 | 0 |
| DRC7      | chr16 | 57735938/G//A             | nonsynonymous | 1 | 0 |
| TP53      | chr17 | 7579439/GC//G             | nonsynonymous | 1 | 0 |
| ALOX12B   | chr17 | 7976064/G//A              | synonymous    | 1 | 0 |
| QRICH2    | chr17 | 74288961/T//A             | nonsynonymous | 1 | 0 |
|           | chr18 | 690748/G//T               | synonymous    | 1 | 0 |
| ANKRD24   | chr19 | 4217339/A//C              | synonymous    | 1 | 0 |
| FEM1A     | chr19 | 4793055/G//A              | nonsynonymous | 1 | 0 |
| CCNE1     | chr19 | 30311669/C//T             | nonsynonymous | 1 | 0 |
| SIGLEC10  | chr19 | 51920166/G//T             | nonsynonymous | 1 | 0 |
| ZNF816    | chr19 | 53453811/T//C             | nonsynonymous | 1 | 0 |
| LILRB2    | chr19 | 54778533/C//T             | synonymous    | 1 | 0 |
| DNTTIP1   | chr20 | 44424012/G//A             | nonsynonymous | 1 | 0 |
| KRTAP10-6 | chr21 | 46012279/G//A             | synonymous    | 1 | 0 |
| CNTN2     | chr1  | 205042928/G//A            | synonymous    | 1 | 0 |
| HLA-C     | chr6  | 31239006/G//T             | nonsynonymous | 1 | 0 |
| ZNF92     | chr7  | 64864109/T//G             | nonsynonymous | 1 | 0 |
| BRCA1     | chr17 | 41228556/T//C             | nonsynonymous | 1 | 0 |
| DDX42     | chr17 | 61886190/A//G             | nonsynonymous | 1 | 0 |
| FCRL3     | chr1  | 157650499/T//G            | nonsynonymous | 0 | 1 |
| FMO3      | chr1  | 171083389/T//G            | nonsynonymous | 0 | 1 |
| DENND1B   | chr1  | 197480861/A//G            | synonymous    | 0 | 1 |
| ZNF281    | chr1  | 200376637/G//A            | nonsynonymous | 0 | 1 |
| HSD11B1   | chr1  | 209879232/G//A            | synonymous    | 0 | 1 |
| ZP4       | chr1  | 238054027/A//C            | synonymous    | 0 | 1 |
| FMN2      | chr1  | 240371923/T//C            | synonymous    | 0 | 1 |
| FMN2      | chr1  | 240497208/T//C            | nonsynonymous | 0 | 1 |
| KIF26B    | chr1  | 245851399/G//A            | nonsynonymous | 0 | 1 |
| HEATR5B   | chr2  | 37255878/C//G             | nonsynonymous | 0 | 1 |
| DHX57     | chr2  | 39088395/C//T             | nonsynonymous | 0 | 1 |
| PSME4     | chr2  | 54159145/A//C             | synonymous    | 0 | 1 |
| NEB       | chr2  | 152423720/C//A            | nonsynonymous | 0 | 1 |
|           | chr2  | 166020347/A//G            | synonymous    | 0 | 1 |
| SCN1A     | chr2  | 166848771/T//G            | nonsynonymous | 0 | 1 |
|           | chr2  | 179610825/T//G            | synonymous    | 0 | 1 |
| SP140     | chr2  | 231112630/G//C            | nonsynonymous | 0 | 1 |
|           | chr3  | 384687/A//G               | synonymous    | 0 | 1 |
| PSMD6     | chr3  | 64008042/G//C             | synonymous    | 0 | 1 |
| PRICKLE2  | chr3  | 64148769/C//G             | nonsynonymous | 0 | 1 |
| CPA3      | chr3  | 148601406/C//A            | nonsynonymous | 0 | 1 |
| SOX2      | chr3  | 181430210/GCGGCGGCAACTCC, | nonsynonymous | 0 | 1 |
| GABRB1    | chr4  | 47163459/C//A             | nonsynonymous | 0 | 1 |
| WDFY3     | chr4  | 85715820/A//T             | synonymous    | 0 | 1 |
| ADGRV1    | chr5  | 89948189/G//C             | nonsynonymous | 0 | 1 |
| SH3TC2    | chr5  | 148431729/A//G            | nonsynonymous | 0 | 1 |
| FAM71B    | chr5  | 156590428/G//T            | nonsynonymous | 0 | 1 |

|          |       |                |               |   |   |
|----------|-------|----------------|---------------|---|---|
| RNF145   | chr5  | 158585737/C//A | nonsynonymous | 0 | 1 |
| TDRD6    | chr6  | 46656182/C//T  | nonsynonymous | 0 | 1 |
| DNAH11   | chr7  | 21599376/T//C  | nonsynonymous | 0 | 1 |
| HECW1    | chr7  | 43485066/C//T  | synonymous    | 0 | 1 |
| DGKI     | chr7  | 137170128/G//T | nonsynonymous | 0 | 1 |
| SVOPL    | chr7  | 138281172/C//T | nonsynonymous | 0 | 1 |
| SSPO     | chr7  | 149503904/C//T | nonsynonymous | 0 | 1 |
| BLK      | chr8  | 11412370/G//A  | synonymous    | 0 | 1 |
| PXDNL    | chr8  | 52287285/G//A  | synonymous    | 0 | 1 |
| CSPP1    | chr8  | 67998281/A//G  | nonsynonymous | 0 | 1 |
| ZFHX4    | chr8  | 77766282/C//T  | synonymous    | 0 | 1 |
| RIMS2    | chr8  | 104955133/A//G | nonsynonymous | 0 | 1 |
| VLDLR    | chr9  | 2647544/C//T   | nonsynonymous | 0 | 1 |
| WDFY4    | chr10 | 50165260/C//T  | synonymous    | 0 | 1 |
| DMBT1    | chr10 | 124353101/G//A | synonymous    | 0 | 1 |
| DCDC1    | chr11 | 31349702/T//C  | synonymous    | 0 | 1 |
| DDB2     | chr11 | 47238556/C//A  | nonsynonymous | 0 | 1 |
| OR4C46   | chr11 | 51515421/T//G  | nonsynonymous | 0 | 1 |
| AHNAK    | chr11 | 62287766/T//C  | nonsynonymous | 0 | 1 |
| KLRB1    | chr12 | 9747961/G//C   | nonsynonymous | 0 | 1 |
| LDHB     | chr12 | 21795029/A//C  | nonsynonymous | 0 | 1 |
| MPHOSPH9 | chr12 | 123641410/A//T | nonsynonymous | 0 | 1 |
| GTF3A    | chr13 | 27998802/G//A  | synonymous    | 0 | 1 |
| MAB21L1  | chr13 | 36049417/G//T  | synonymous    | 0 | 1 |
| NBEA     | chr13 | 36202224/G//C  | nonsynonymous | 0 | 1 |
| OR4K15   | chr14 | 20443837/A//C  | nonsynonymous | 0 | 1 |
| ADAM21   | chr14 | 70924301/T//A  | nonsynonymous | 0 | 1 |
| SPRED1   | chr15 | 38643710/G//C  | nonsynonymous | 0 | 1 |
| C15orf52 | chr15 | 40627653/A//G  | synonymous    | 0 | 1 |
| HDC      | chr15 | 50535210/G//T  | synonymous    | 0 | 1 |
| GP2      | chr16 | 20330949/T//A  | nonsynonymous | 0 | 1 |
| SRCAP    | chr16 | 30720956/C//G  | nonsynonymous | 0 | 1 |
| CES1     | chr16 | 55854390/A//C  | nonsynonymous | 0 | 1 |
| JUP      | chr17 | 39912005/C//A  | nonsynonymous | 0 | 1 |
| MRC2     | chr17 | 60749511/C//G  | nonsynonymous | 0 | 1 |
| RYR1     | chr19 | 39052022/C//T  | synonymous    | 0 | 1 |
| NLRP5    | chr19 | 56561901/G//C  | synonymous    | 0 | 1 |
| TASP1    | chr20 | 13604101/C//T  | nonsynonymous | 0 | 1 |
| PTPRT    | chr20 | 41400106/T//G  | nonsynonymous | 0 | 1 |
| SEMG2    | chr20 | 43851235/A//C  | nonsynonymous | 0 | 1 |
| PCBP3    | chr21 | 47269966/T//C  | synonymous    | 0 | 1 |
| TSSK2    | chr22 | 19119970/T//C  | nonsynonymous | 0 | 1 |
| SFI1     | chr22 | 32012989/G//C  | nonsynonymous | 0 | 1 |
| PPEF1    | chrX  | 18751900/A//C  | nonsynonymous | 0 | 1 |
| KDM6A    | chrX  | 44918338/G//A  | nonsynonymous | 0 | 1 |
| GRIPAP1  | chrX  | 48849996/C//G  | synonymous    | 0 | 1 |
| TRO      | chrX  | 54953538/A//C  | nonsynonymous | 0 | 1 |
| AWAT1    | chrX  | 69458119/A//G  | nonsynonymous | 0 | 1 |
| LRCH2    | chrX  | 114361445/A//C | nonsynonymous | 0 | 1 |
| TENM1    | chrX  | 124029830/C//A | nonsynonymous | 0 | 1 |
| ADGRG4   | chrX  | 135470021/T//A | synonymous    | 0 | 1 |
| ARHGEF6  | chrX  | 135750147/G//C | synonymous    | 0 | 1 |
| PRKCZ    | chr1  | 2116433/C//T   | synonymous    | 0 | 1 |
| CASZ1    | chr1  | 10720214/C//T  | synonymous    | 0 | 1 |
| CROCC    | chr1  | 17257875/G//A  | synonymous    | 0 | 1 |
| CSMD2    | chr1  | 34192255/G//A  | synonymous    | 0 | 1 |
| PDE4B    | chr1  | 66723359/T//A  | nonsynonymous | 0 | 1 |
| ANP32E   | chr1  | 150208146/G//T | synonymous    | 0 | 1 |
| DENND4B  | chr1  | 153909208/T//C | nonsynonymous | 0 | 1 |
| OR6Y1    | chr1  | 158517832/A//T | nonsynonymous | 0 | 1 |
| OR10X1   | chr1  | 158549540/G//C | synonymous    | 0 | 1 |
| VANGL2   | chr1  | 160388931/C//T | nonsynonymous | 0 | 1 |
| TNN      | chr1  | 175066648/G//A | nonsynonymous | 0 | 1 |
| TNR      | chr1  | 175375396/C//T | nonsynonymous | 0 | 1 |
| RYR2     | chr1  | 237666611/C//T | nonsynonymous | 0 | 1 |
| SOX11    | chr2  | 5833483/C//T   | synonymous    | 0 | 1 |
| TEX37    | chr2  | 88829078/A//G  | synonymous    | 0 | 1 |
| CCDC93   | chr2  | 118732437/C//T | nonsynonymous | 0 | 1 |
| MGAT5    | chr2  | 135119934/G//C | nonsynonymous | 0 | 1 |
| TTN      | chr2  | 179549431/G//T | nonsynonymous | 0 | 1 |

|          |       |                |               |   |   |
|----------|-------|----------------|---------------|---|---|
| ZNF804A  | chr2  | 185800753/C//A | nonsynonymous | 0 | 1 |
| TMEFF2   | chr2  | 192818466/C//T | nonsynonymous | 0 | 1 |
| GPR55    | chr2  | 231774771/G//A | nonsynonymous | 0 | 1 |
| B3GNT7   | chr2  | 232263023/G//A | nonsynonymous | 0 | 1 |
| ITPR1    | chr3  | 4722294/C//T   | nonsynonymous | 0 | 1 |
| DOCK3    | chr3  | 51265479/C//A  | nonsynonymous | 0 | 1 |
| TF       | chr3  | 133478162/G//A | nonsynonymous | 0 | 1 |
| NWD2     | chr4  | 37447889/G//A  | nonsynonymous | 0 | 1 |
| PDGFRA   | chr4  | 55144540/A//G  | nonsynonymous | 0 | 1 |
| TRPC3    | chr4  | 122854128/G//A | synonymous    | 0 | 1 |
| ABCE1    | chr4  | 146030403/T//C | nonsynonymous | 0 | 1 |
| FAT1     | chr4  | 187540638/G//C | nonsynonymous | 0 | 1 |
| HTR1A    | chr5  | 63257077/A//T  | nonsynonymous | 0 | 1 |
| MEGF10   | chr5  | 126792936/C//T | nonsynonymous | 0 | 1 |
| ARHGAP26 | chr5  | 142283133/C//A | nonsynonymous | 0 | 1 |
| FAM193B  | chr5  | 176952051/C//G | nonsynonymous | 0 | 1 |
| CAP2     | chr6  | 17507405/C//T  | synonymous    | 0 | 1 |
| DDX39B   | chr6  | 31498649/C//T  | nonsynonymous | 0 | 1 |
| PNPLA1   | chr6  | 36262156/T//A  | nonsynonymous | 0 | 1 |
| SRSF12   | chr6  | 89808392/A//G  | nonsynonymous | 0 | 1 |
| ANKRD6   | chr6  | 90333675/A//T  | nonsynonymous | 0 | 1 |
| ARMC2    | chr6  | 109258205/C//G | synonymous    | 0 | 1 |
| SYNE1    | chr6  | 152804279/C//T | nonsynonymous | 0 | 1 |
| ARID1B   | chr6  | 157528716/G//A | synonymous    | 0 | 1 |
| THBS2    | chr6  | 169620303/G//A | synonymous    | 0 | 1 |
| SOSTDC1  | chr7  | 16505207/T//C  | synonymous    | 0 | 1 |
| PDE1C    | chr7  | 31855647/C//T  | synonymous    | 0 | 1 |
| AEBP1    | chr7  | 44149705/C//T  | synonymous    | 0 | 1 |
| ZNF736   | chr7  | 63796713/G//A  | nonsynonymous | 0 | 1 |
| TBL2     | chr7  | 72985185/G//A  | synonymous    | 0 | 1 |
| POR      | chr7  | 75583397/G//A  | synonymous    | 0 | 1 |
| MAGI2    | chr7  | 77708256/A//G  | synonymous    | 0 | 1 |
| AKAP9    | chr7  | 91708438/A//G  | nonsynonymous | 0 | 1 |
| SGCE     | chr7  | 94285433/G//A  | synonymous    | 0 | 1 |
| PEG10    | chr7  | 94293791/G//T  | nonsynonymous | 0 | 1 |
| GPR22    | chr7  | 107114494/T//C | synonymous    | 0 | 1 |
| KRBA1    | chr7  | 149430564/C//T | nonsynonymous | 0 | 1 |
| CYHR1    | chr8  | 145689968/G//A | synonymous    | 0 | 1 |
| FREM1    | chr9  | 14868828/C//A  | nonsynonymous | 0 | 1 |
| BICD2    | chr9  | 95480947/C//A  | nonsynonymous | 0 | 1 |
| COL15A1  | chr9  | 101802811/C//T | synonymous    | 0 | 1 |
| ZNF462   | chr9  | 109686504/C//A | nonsynonymous | 0 | 1 |
| GLE1     | chr9  | 131277825/G//A | synonymous    | 0 | 1 |
| OLFM1    | chr9  | 137998685/C//G | nonsynonymous | 0 | 1 |
| GJD4     | chr10 | 35897459/G//A  | nonsynonymous | 0 | 1 |
| HBG2     | chr11 | 5274533/T//G   | nonsynonymous | 0 | 1 |
| MRGPRX1  | chr11 | 18955511/A//G  | nonsynonymous | 0 | 1 |
| OR4S1    | chr11 | 48327866/T//A  | nonsynonymous | 0 | 1 |
| CDC42BPG | chr11 | 64602033/G//A  | nonsynonymous | 0 | 1 |
| ZFPL1    | chr11 | 64855507/G//A  | nonsynonymous | 0 | 1 |
| UBASH3B  | chr11 | 122526634/C//A | synonymous    | 0 | 1 |
| EI24     | chr11 | 125453595/A//T | synonymous    | 0 | 1 |
| CHD4     | chr12 | 6691871/G//C   | nonsynonymous | 0 | 1 |
| EPS8     | chr12 | 15823847/C//T  | synonymous    | 0 | 1 |
| LRRK2    | chr12 | 40728922/C//A  | nonsynonymous | 0 | 1 |
| COPZ1    | chr12 | 54737046/C//G  | nonsynonymous | 0 | 1 |
| TRHDE    | chr12 | 73046878/C//A  | nonsynonymous | 0 | 1 |
| CMKLR1   | chr12 | 108685821/C//T | nonsynonymous | 0 | 1 |
| SRRM4    | chr12 | 119568586/C//T | nonsynonymous | 0 | 1 |
| SOHLH2   | chr13 | 36767830/A//G  | synonymous    | 0 | 1 |
| HTR2A    | chr13 | 47409051/A//G  | nonsynonymous | 0 | 1 |
| TBC1D4   | chr13 | 75898454/G//T  | nonsynonymous | 0 | 1 |
| SLITRK6  | chr13 | 86368219/T//A  | nonsynonymous | 0 | 1 |
| SLITRK6  | chr13 | 86369344/G//A  | nonsynonymous | 0 | 1 |
| IRS2     | chr13 | 110435221/T//C | synonymous    | 0 | 1 |
| SOX1     | chr13 | 112722295/G//A | nonsynonymous | 0 | 1 |
| POTEG    | chr14 | 19553556/G//A  | nonsynonymous | 0 | 1 |
| LRP10    | chr14 | 23346314/C//T  | nonsynonymous | 0 | 1 |
| DLGAP5   | chr14 | 55655725/C//A  | nonsynonymous | 0 | 1 |
| C14orf39 | chr14 | 60951662/T//G  | synonymous    | 0 | 1 |

|           |       |                           |               |   |   |
|-----------|-------|---------------------------|---------------|---|---|
| EIF2B2    | chr14 | 75473387/C//G             | synonymous    | 0 | 1 |
| NRXN3     | chr14 | 80158612/G//A             | synonymous    | 0 | 1 |
| PKM       | chr15 | 72492851/C//T             | nonsynonymous | 0 | 1 |
| ADAMTSL3  | chr15 | 84582090/G//A             | synonymous    | 0 | 1 |
| CLUAP1    | chr16 | 3556415/G//A              | nonsynonymous | 0 | 1 |
| GSPT1     | chr16 | 11971412/A//G             | nonsynonymous | 0 | 1 |
| PAPD5     | chr16 | 50186916/C//A             | nonsynonymous | 0 | 1 |
| SPNS2     | chr17 | 4436706/G//A              | synonymous    | 0 | 1 |
| CSHL1     | chr17 | 61988667/C//T             | synonymous    | 0 | 1 |
| ABCA8     | chr17 | 66915620/G//T             | synonymous    | 0 | 1 |
| DNAH17    | chr17 | 76475198/G//C             | nonsynonymous | 0 | 1 |
| BAHCC1    | chr17 | 79426527/C//T             | synonymous    | 0 | 1 |
| CBLN2     | chr18 | 70209248/G//A             | nonsynonymous | 0 | 1 |
| HDGFRP2   | chr19 | 4494222/G//A              | nonsynonymous | 0 | 1 |
| SAFB      | chr19 | 5661648/G//A              | nonsynonymous | 0 | 1 |
| TSHZ3     | chr19 | 31768675/C//T             | nonsynonymous | 0 | 1 |
| PSMC4     | chr19 | 40478074/G//A             | nonsynonymous | 0 | 1 |
| PSG1      | chr19 | 43372462/C//T             | nonsynonymous | 0 | 1 |
| HAO1      | chr20 | 7864263/G//T              | nonsynonymous | 0 | 1 |
| HCK       | chr20 | 30681743/T//C             | synonymous    | 0 | 1 |
| SLC32A1   | chr20 | 37357130/T//A             | nonsynonymous | 0 | 1 |
| GNAS      | chr20 | 57429128/G//A             | nonsynonymous | 0 | 1 |
| CDH4      | chr20 | 60448790/A//G             | nonsynonymous | 0 | 1 |
| DIP2A     | chr21 | 47957204/G//A             | synonymous    | 0 | 1 |
| MKL1      | chr22 | 40816477/C//T             | nonsynonymous | 0 | 1 |
| TRABD     | chr22 | 50632768/G//C             | nonsynonymous | 0 | 1 |
| SCML1     | chrX  | 17768154/T//G             | nonsynonymous | 0 | 1 |
| SMS       | chrX  | 21997083/AGG//A           | nonsynonymous | 0 | 1 |
| MTRNR2L10 | chrX  | 55208360/C//T             | nonsynonymous | 0 | 1 |
| CAPN6     | chrX  | 110496310/G//A            | synonymous    | 0 | 1 |
| MAP7D3    | chrX  | 135313132/A//G            | synonymous    | 0 | 1 |
| GNL1      | chr6  | 30524043/CCG//C           | synonymous    | 1 | 0 |
| ATXN3     | chr14 | 92537354/C//G             | nonsynonymous | 1 | 0 |
| ZNF726    | chr19 | 24115797/A//T             | synonymous    | 1 | 0 |
| KPTN      | chr19 | 47986463/A//G             | nonsynonymous | 1 | 0 |
| ZBTB17    | chr1  | 16272253/A//T             | synonymous    | 1 | 0 |
| PATJ      | chr1  | 62483535/A//G             | nonsynonymous | 1 | 0 |
| NTNG1     | chr1  | 107867537/C//T            | nonsynonymous | 1 | 0 |
| ATP1A2    | chr1  | 160106108/G//A            | synonymous    | 1 | 0 |
| CCDC142   | chr2  | 74702189/A//AG            | nonsynonymous | 1 | 0 |
| TMEM131   | chr2  | 98412846/T//C             | nonsynonymous | 1 | 0 |
| KIF5C     | chr2  | 149806950/C//A            | synonymous    | 1 | 0 |
| NFE2L2    | chr2  | 178098965/T//A            | nonsynonymous | 1 | 0 |
| TTN       | chr2  | 179569463/C//G            | nonsynonymous | 1 | 0 |
| SATB2     | chr2  | 200320707/G//A            | synonymous    | 1 | 0 |
| FN1       | chr2  | 216271962/G//C            | synonymous    | 1 | 0 |
| PER2      | chr2  | 239186564/G//A            | nonsynonymous | 1 | 0 |
| IL17RD    | chr3  | 57139962/T//A             | nonsynonymous | 1 | 0 |
| ATP13A5   | chr3  | 193039582/G//T            | synonymous    | 1 | 0 |
| CPN2      | chr3  | 194062814/A//G            | synonymous    | 1 | 0 |
| TNIP2     | chr4  | 2743855/T//C              | synonymous    | 1 | 0 |
| KIT       | chr4  | 55593602/G//A             | synonymous    | 1 | 0 |
| SELENOP   | chr5  | 42808417/G//A             | synonymous    | 1 | 0 |
| MAST4     | chr5  | 66460411/G//A             | nonsynonymous | 1 | 0 |
| CDK7      | chr5  | 68531284/A//G             | synonymous    | 1 | 0 |
| GRIA1     | chr5  | 153144132/G//A            | synonymous    | 1 | 0 |
| GFPT2     | chr5  | 179745866/G//C            | synonymous    | 1 | 0 |
| TUBB2A    | chr6  | 3155948/G//T              | nonsynonymous | 1 | 0 |
| FAM83B    | chr6  | 54735002/ATGAATGGACATT//A | synonymous    | 1 | 0 |
| DST       | chr6  | 56433383/T//G             | nonsynonymous | 1 | 0 |
| LGSN      | chr6  | 63990729/G//C             | nonsynonymous | 1 | 0 |
| BACH2     | chr6  | 90642375/A//C             | nonsynonymous | 1 | 0 |
| SOGA3     | chr6  | 127797356/G//A            | synonymous    | 1 | 0 |
| MACC1     | chr7  | 20197843/A//G             | nonsynonymous | 1 | 0 |
| SLC12A9   | chr7  | 100457527/A//G            | nonsynonymous | 1 | 0 |
| WDR34     | chr9  | 131397011/G//C            | nonsynonymous | 1 | 0 |
| SEC31B    | chr10 | 102255156/G//A            | nonsynonymous | 1 | 0 |
| C10orf95  | chr10 | 104210700/C//CG           | nonsynonymous | 1 | 0 |
| CTBP2     | chr10 | 126686672/G//A            | synonymous    | 1 | 0 |
|           | chr11 | 3062265/C//T              | synonymous    | 1 | 0 |

|          |       |                  |               |   |   |
|----------|-------|------------------|---------------|---|---|
| OVCH2    | chr11 | 7718314/C//T     | nonsynonymous | 1 | 0 |
| LDHA     | chr11 | 18421044/C//A    | nonsynonymous | 1 | 0 |
| KCNA4    | chr11 | 30033399/A//C    | nonsynonymous | 1 | 0 |
| DNM1L    | chr12 | 32895531/A//G    | nonsynonymous | 1 | 0 |
| SLC38A4  | chr12 | 47186907/T//A//T | synonymous    | 1 | 0 |
| XPOT     | chr12 | 64803758/C//T    | synonymous    | 1 | 0 |
| HECTD4   | chr12 | 112613591/C//T   | nonsynonymous | 1 | 0 |
| NYNRIN   | chr14 | 24884321/C//G    | synonymous    | 1 | 0 |
| AHNAK2   | chr14 | 105415279/T//C   | nonsynonymous | 1 | 0 |
| AHNAK2   | chr14 | 105415281/G//C   | synonymous    | 1 | 0 |
| RYR3     | chr15 | 34150071/G//A    | nonsynonymous | 1 | 0 |
| PKM      | chr15 | 72494854/G//A    | synonymous    | 1 | 0 |
| SAXO2    | chr15 | 82574607/C//A    | nonsynonymous | 1 | 0 |
| IGF1R    | chr15 | 99500580/C//T    | nonsynonymous | 1 | 0 |
| UNKL     | chr16 | 1420252/C//T     | synonymous    | 1 | 0 |
| ZC3H7A   | chr16 | 11845315/T//C    | nonsynonymous | 1 | 0 |
| DHX38    | chr16 | 72142239/C//G    | nonsynonymous | 1 | 0 |
| GAS8-AS1 | chr16 | 90095838/A//G    | synonymous    | 1 | 0 |
| TLCD1    | chr17 | 27051637/A//T    | nonsynonymous | 1 | 0 |
| BRCA1    | chr17 | 41209153/C//G    | nonsynonymous | 1 | 0 |
| MMD      | chr17 | 53488660/G//C    | nonsynonymous | 1 | 0 |
| MTCL1    | chr18 | 8784096/G//A     | nonsynonymous | 1 | 0 |
| MUC16    | chr19 | 9063751/C//T     | nonsynonymous | 1 | 0 |
| KRI1     | chr19 | 10665806/A//C    | nonsynonymous | 1 | 0 |
| PLPPR2   | chr19 | 11475288/G//C    | synonymous    | 1 | 0 |
| ZNF526   | chr19 | 42729030/C//T    | nonsynonymous | 1 | 0 |
| ADAM33   | chr20 | 3662619/G//A     | synonymous    | 1 | 0 |
| NINL     | chr20 | 25434140/G//A    | nonsynonymous | 1 | 0 |
| ZNF337   | chr20 | 25655979/T//C    | nonsynonymous | 1 | 0 |
| MXRA5    | chrX  | 3239617/G//A     | nonsynonymous | 1 | 0 |
| KLHL34   | chrX  | 21675450/A//T    | nonsynonymous | 1 | 0 |
| DUSP9    | chrX  | 152915467/G//A   | nonsynonymous | 1 | 0 |
| AGMAT    | chr1  | 15911364/G//A    | synonymous    | 1 | 0 |
| CLSPN    | chr1  | 36212457/G//C    | nonsynonymous | 1 | 0 |
| CSF3R    | chr1  | 36937740/G//T    | nonsynonymous | 1 | 0 |
| HPCAL4   | chr1  | 40148316/C//T    | synonymous    | 1 | 0 |
| CACHD1   | chr1  | 65117915/A//T    | nonsynonymous | 1 | 0 |
| LRR7     | chr1  | 70478661/G//A    | nonsynonymous | 1 | 0 |
| NEXN     | chr1  | 78401558/G//C    | synonymous    | 1 | 0 |
| BTBD8    | chr1  | 92573536/G//T    | nonsynonymous | 1 | 0 |
| PALMD    | chr1  | 100155068/A//T   | nonsynonymous | 1 | 0 |
| TSHB     | chr1  | 115576615/C//A   | nonsynonymous | 1 | 0 |
| TARS2    | chr1  | 150468996/G//A   | synonymous    | 1 | 0 |
| NPR1     | chr1  | 153655941/C//A   | nonsynonymous | 1 | 0 |
| TPM3     | chr1  | 154143148/T//C   | nonsynonymous | 1 | 0 |
| FCGR3A   | chr1  | 161514606/A//C   | nonsynonymous | 1 | 0 |
| RGS8     | chr1  | 182641960/G//C   | synonymous    | 1 | 0 |
| LAMC2    | chr1  | 183197751/C//T   | nonsynonymous | 1 | 0 |
| TPR      | chr1  | 186324573/T//C   | nonsynonymous | 1 | 0 |
| PLEKHA6  | chr1  | 204210820/G//C   | synonymous    | 1 | 0 |
| VN1R5    | chr1  | 247419973/T//C   | synonymous    | 1 | 0 |
| YWHAQ    | chr2  | 9770300/G//A     | synonymous    | 1 | 0 |
| GREB1    | chr2  | 11728987/C//T    | synonymous    | 1 | 0 |
| WDPC     | chr2  | 24262091/G//C    | nonsynonymous | 1 | 0 |
| ERLEC1   | chr2  | 54028705/G//A    | nonsynonymous | 1 | 0 |
| TGFA     | chr2  | 70680399/C//T    | synonymous    | 1 | 0 |
| DCTN1    | chr2  | 74605138/G//A    | nonsynonymous | 1 | 0 |
| CTNNA2   | chr2  | 80136827/C//T    | synonymous    | 1 | 0 |
| ARID5A   | chr2  | 97216870/A//G    | nonsynonymous | 1 | 0 |
| UGGT1    | chr2  | 128903374/C//G   | synonymous    | 1 | 0 |
| XIRP2    | chr2  | 168104191/G//C   | nonsynonymous | 1 | 0 |
| GORASP2  | chr2  | 171807839/C//G   | nonsynonymous | 1 | 0 |
| GPR155   | chr2  | 175346374/T//C   | nonsynonymous | 1 | 0 |
| NFE2L2   | chr2  | 178098973/C//G   | nonsynonymous | 1 | 0 |
| TTN      | chr2  | 179406036/T//A   | nonsynonymous | 1 | 0 |
| COL3A1   | chr2  | 189851860/C//A   | nonsynonymous | 1 | 0 |
| HIBCH    | chr2  | 191161620/C//T   | synonymous    | 1 | 0 |
| SMARCAL1 | chr2  | 217332742/C//T   | synonymous    | 1 | 0 |
| CFAP65   | chr2  | 219892540/C//A   | nonsynonymous | 1 | 0 |
| SPEG     | chr2  | 220346397/T//G   | nonsynonymous | 1 | 0 |

|            |      |                     |               |   |   |
|------------|------|---------------------|---------------|---|---|
| OBSL1      | chr2 | 220422286/G//T      | nonsynonymous | 1 | 0 |
| ACSL3      | chr2 | 223781119/T//A      | nonsynonymous | 1 | 0 |
| COL4A3     | chr2 | 228155479/G//T      | nonsynonymous | 1 | 0 |
| DAW1       | chr2 | 228786132/A//T      | nonsynonymous | 1 | 0 |
| SP140L     | chr2 | 231191947/C//G      | synonymous    | 1 | 0 |
| ACKR3      | chr2 | 237489344/C//T      | nonsynonymous | 1 | 0 |
| PASK       | chr2 | 242082415/C//T      | synonymous    | 1 | 0 |
| ZCWPW2     | chr3 | 28454717/A//G       | nonsynonymous | 1 | 0 |
| HHATL      | chr3 | 42734298/T//A       | nonsynonymous | 1 | 0 |
| SMARCC1    | chr3 | 47703896/T//C       | nonsynonymous | 1 | 0 |
| ZNF589     | chr3 | 48310279/C//G       | synonymous    | 1 | 0 |
| IMPDH2     | chr3 | 49065918/C//G       | synonymous    | 1 | 0 |
| OR5AC2     | chr3 | 97806690/T//C       | nonsynonymous | 1 | 0 |
| TMEM45A    | chr3 | 100287738/C//G      | nonsynonymous | 1 | 0 |
| ADGRG7     | chr3 | 100387900/G//C      | nonsynonymous | 1 | 0 |
| MYH15      | chr3 | 108163486/C//A      | nonsynonymous | 1 | 0 |
| POGLUT1    | chr3 | 119209542/C//G      | synonymous    | 1 | 0 |
| MAATS1     | chr3 | 119456274/G//T      | nonsynonymous | 1 | 0 |
| LRRRC58    | chr3 | 120050193/G//A      | nonsynonymous | 1 | 0 |
| HCLS1      | chr3 | 121351997/G//A      | nonsynonymous | 1 | 0 |
| LINC01565  | chr3 | 128292561/C//T      | synonymous    | 1 | 0 |
|            | chr3 | 132086560/T//C      | synonymous    | 1 | 0 |
| TF         | chr3 | 133467323/G//A      | synonymous    | 1 | 0 |
| BCHE       | chr3 | 165548790/C//G      | nonsynonymous | 1 | 0 |
| NAALADL2   | chr3 | 175184961/G//A      | nonsynonymous | 1 | 0 |
| PIK3CA     | chr3 | 178952074/G//C      | nonsynonymous | 1 | 0 |
| CHRD       | chr3 | 184104472/G//A      | nonsynonymous | 1 | 0 |
| IQCG       | chr3 | 197616555/G//A      | nonsynonymous | 1 | 0 |
| ZNF595     | chr4 | 87169/T//A          | nonsynonymous | 1 | 0 |
| TXK        | chr4 | 48106911/GA//G      | synonymous    | 1 | 0 |
| UGT2B4     | chr4 | 70355242/A//C       | nonsynonymous | 1 | 0 |
| SULT1B1    | chr4 | 70592755/C//G       | synonymous    | 1 | 0 |
| CABS1      | chr4 | 71200803/A//C       | nonsynonymous | 1 | 0 |
| SEC31A     | chr4 | 83765578/G//GAC     | nonsynonymous | 1 | 0 |
| RAP1GDS1   | chr4 | 99363214/A//T       | nonsynonymous | 1 | 0 |
| ZGRF1      | chr4 | 113509055/T//C      | nonsynonymous | 1 | 0 |
| PRDM5      | chr4 | 121737672/G//T      | nonsynonymous | 1 | 0 |
| HMGB2      | chr4 | 174254661/T//C      | nonsynonymous | 1 | 0 |
| ADAM29     | chr4 | 175898400/G//T      | nonsynonymous | 1 | 0 |
| SLC25A4    | chr4 | 186066254/G//A      | nonsynonymous | 1 | 0 |
| GHR        | chr5 | 42719379/G//T       | nonsynonymous | 1 | 0 |
| IQGAP2     | chr5 | 75699191/G//C       | synonymous    | 1 | 0 |
| FTMT       | chr5 | 121187819/C//G      | nonsynonymous | 1 | 0 |
| RAD50      | chr5 | 131925511/C//G      | nonsynonymous | 1 | 0 |
| PCDHB9     | chr5 | 140567805/G//T      | nonsynonymous | 1 | 0 |
| FAT2       | chr5 | 150911499/CCGGCA//C | nonsynonymous | 1 | 0 |
| CYFIP2     | chr5 | 156787289/G//T      | nonsynonymous | 1 | 0 |
| CDHR2      | chr5 | 176005447/C//G      | synonymous    | 1 | 0 |
| PPP1R3G    | chr6 | 5086563/G//T        | nonsynonymous | 1 | 0 |
| SYCP2L     | chr6 | 10894436/A//G       | nonsynonymous | 1 | 0 |
| ZNF184     | chr6 | 27419657/G//T       | nonsynonymous | 1 | 0 |
| TAP2       | chr6 | 32800441/C//G       | nonsynonymous | 1 | 0 |
| UHRF1BP1   | chr6 | 34827325/G//T       | nonsynonymous | 1 | 0 |
| SLC25A27   | chr6 | 46620956/G//T       | nonsynonymous | 1 | 0 |
| COL9A1     | chr6 | 71004216/A//T       | nonsynonymous | 1 | 0 |
| PNRC1      | chr6 | 89793532/C//G       | nonsynonymous | 1 | 0 |
| HSF2       | chr6 | 122743351/C//T      | synonymous    | 1 | 0 |
| ARFGEF3    | chr6 | 138584734/C//T      | nonsynonymous | 1 | 0 |
| STXBP5     | chr6 | 147684656/G//A      | nonsynonymous | 1 | 0 |
| SYNE1      | chr6 | 152737903/G//A      | nonsynonymous | 1 | 0 |
| IGF2R      | chr6 | 160482960/G//A      | synonymous    | 1 | 0 |
| STK31      | chr7 | 23871758/G//A       | nonsynonymous | 1 | 0 |
| STK17A     | chr7 | 43622953/C//G       | synonymous    | 1 | 0 |
| IKZF1      | chr7 | 50467949/A//G       | nonsynonymous | 1 | 0 |
| CACNA2D1   | chr7 | 81689745/G//A       | nonsynonymous | 1 | 0 |
| PCLO       | chr7 | 82584446/A//G       | synonymous    | 1 | 0 |
| SEMA3E     | chr7 | 83022001/G//C       | nonsynonymous | 1 | 0 |
| DYNC111    | chr7 | 95614255/G//C       | nonsynonymous | 1 | 0 |
| PCOLCE-AS1 | chr7 | 100187294/G//T      | synonymous    | 1 | 0 |
| MUC12      | chr7 | 100635220/C//T      | nonsynonymous | 1 | 0 |

|          |       |                         |               |   |   |
|----------|-------|-------------------------|---------------|---|---|
| PMPCB    | chr7  | 102949402/C//T          | nonsynonymous | 1 | 0 |
| TMEM209  | chr7  | 129841684/C//T          | synonymous    | 1 | 0 |
| TRPV5    | chr7  | 142625311/G//A          | nonsynonymous | 1 | 0 |
| PRSS55   | chr8  | 10383256/A//G           | synonymous    | 1 | 0 |
| C8orf86  | chr8  | 38386148/G//T           | nonsynonymous | 1 | 0 |
| C8orf86  | chr8  | 38386158/C//G           | synonymous    | 1 | 0 |
| RP1      | chr8  | 55542442/G//C           | nonsynonymous | 1 | 0 |
|          | chr8  | 93107453/A//T           | synonymous    | 1 | 0 |
| PKHD1L1  | chr8  | 110441625/G//A          | synonymous    | 1 | 0 |
| CSMD3    | chr8  | 113516053/A//G          | synonymous    | 1 | 0 |
| FRMPD1   | chr9  | 37745224/A//C           | nonsynonymous | 1 | 0 |
| TRPM3    | chr9  | 73736147/T//C           | nonsynonymous | 1 | 0 |
| RASEF    | chr9  | 85677596/T//C           | nonsynonymous | 1 | 0 |
| TRIM32   | chr9  | 119461904/G//C          | nonsynonymous | 1 | 0 |
| OLFML2A  | chr9  | 127561585/C//A          | synonymous    | 1 | 0 |
| LRSAM1   | chr9  | 130258290/G//A          | synonymous    | 1 | 0 |
| FAM129B  | chr9  | 130271353/C//A          | nonsynonymous | 1 | 0 |
| FAM188A  | chr10 | 15831256/C//G           | nonsynonymous | 1 | 0 |
| GPR158   | chr10 | 25878011/C//G           | nonsynonymous | 1 | 0 |
| ITGB1    | chr10 | 33211612/G//C           | nonsynonymous | 1 | 0 |
| PCDH15   | chr10 | 55583117/G//C           | nonsynonymous | 1 | 0 |
| GRID1    | chr10 | 87966397/G//C           | nonsynonymous | 1 | 0 |
| CYP26C1  | chr10 | 94828248/G//A           | nonsynonymous | 1 | 0 |
| ABCC2    | chr10 | 101610461/C//A          | nonsynonymous | 1 | 0 |
| ERLIN1   | chr10 | 101935806/T//C          | nonsynonymous | 1 | 0 |
| PITX3    | chr10 | 103990410/C//G          | nonsynonymous | 1 | 0 |
| SH3PXD2A | chr10 | 105386868/G//C          | nonsynonymous | 1 | 0 |
| CCDC172  | chr10 | 118084569/C//G          | nonsynonymous | 1 | 0 |
| PNLIP    | chr10 | 118318726/T//A          | nonsynonymous | 1 | 0 |
| PLEKHA1  | chr10 | 124166086/C//G          | synonymous    | 1 | 0 |
| DNHD1    | chr11 | 6549937/A//C            | nonsynonymous | 1 | 0 |
| ABCC8    | chr11 | 17428330/G//A           | synonymous    | 1 | 0 |
| FANCF    | chr11 | 22646888/G//T           | nonsynonymous | 1 | 0 |
| OVOL1    | chr11 | 65561716/G//A           | nonsynonymous | 1 | 0 |
| C11orf86 | chr11 | 66742996/G//C           | nonsynonymous | 1 | 0 |
| C2CD3    | chr11 | 73820158/A//G           | nonsynonymous | 1 | 0 |
| FOLH1B   | chr11 | 89413830/A//G           | nonsynonymous | 1 | 0 |
| TRIM77   | chr11 | 89450612/T//A           | nonsynonymous | 1 | 0 |
| USP28    | chr11 | 113688563/A//T          | synonymous    | 1 | 0 |
| CADM1    | chr11 | 115080343/G//T          | synonymous    | 1 | 0 |
| TECTA    | chr11 | 121023726/C//G          | synonymous    | 1 | 0 |
| FGF23    | chr12 | 4488761/T//C            | synonymous    | 1 | 0 |
| CDKN1B   | chr12 | 12871149/G//T           | nonsynonymous | 1 | 0 |
| EPS8     | chr12 | 15835901/T//C           | synonymous    | 1 | 0 |
| DBX2     | chr12 | 45444751/C//T           | synonymous    | 1 | 0 |
| KMT2D    | chr12 | 49426270/G//T           | nonsynonymous | 1 | 0 |
| POU6F1   | chr12 | 51585527/C//G           | nonsynonymous | 1 | 0 |
| MFSD5    | chr12 | 53646729/C//G           | nonsynonymous | 1 | 0 |
| OR6C70   | chr12 | 55863201/G//C           | nonsynonymous | 1 | 0 |
| MIP      | chr12 | 56845061/C//A           | synonymous    | 1 | 0 |
| SRGAP1   | chr12 | 64437329/A//C           | nonsynonymous | 1 | 0 |
| ZFC3H1   | chr12 | 72025913/C//G           | nonsynonymous | 1 | 0 |
| TMEM132C | chr12 | 129190037/G//A          | nonsynonymous | 1 | 0 |
| FNDC3A   | chr13 | 49749536/A//T           | synonymous    | 1 | 0 |
| KLHL1    | chr13 | 70293531/T//C           | nonsynonymous | 1 | 0 |
| ABCC4    | chr13 | 95724056/GTGCTTCTTTT//G | nonsynonymous | 1 | 0 |
| EFS      | chr14 | 23834235/G//C           | synonymous    | 1 | 0 |
| PSME2    | chr14 | 24612705/G//A           | synonymous    | 1 | 0 |
| RALGAPA1 | chr14 | 36147299/C//A           | nonsynonymous | 1 | 0 |
| TBPL2    | chr14 | 55907242/C//G           | nonsynonymous | 1 | 0 |
| SPTB     | chr14 | 65271724/A//T           | nonsynonymous | 1 | 0 |
| C14orf1  | chr14 | 76117842/GGAA//G        | synonymous    | 1 | 0 |
| SPTLC2   | chr14 | 78043230/T//C           | nonsynonymous | 1 | 0 |
| PPP4R3A  | chr14 | 91928438/C//T           | nonsynonymous | 1 | 0 |
| MKRN3    | chr15 | 23811712/C//T           | synonymous    | 1 | 0 |
| MAP1A    | chr15 | 43821137/G//C           | nonsynonymous | 1 | 0 |
| ATP8B4   | chr15 | 50154444/G//T           | nonsynonymous | 1 | 0 |
| RFX7     | chr15 | 56390279/C//T           | synonymous    | 1 | 0 |
|          | chr15 | 67665847/G//A           | synonymous    | 1 | 0 |
| CSPG4    | chr15 | 75983014/G//C           | nonsynonymous | 1 | 0 |

|           |       |                     |               |   |   |
|-----------|-------|---------------------|---------------|---|---|
| CRAMP1    | chr16 | 1723904/G//A        | nonsynonymous | 1 | 0 |
| ELOB      | chr16 | 2822044/C//T        | nonsynonymous | 1 | 0 |
| CCP110    | chr16 | 19547609/A//T       | synonymous    | 1 | 0 |
| SRCAP     | chr16 | 30735164/G//A       | synonymous    | 1 | 0 |
| SALL1     | chr16 | 51171420/C//T       | nonsynonymous | 1 | 0 |
| TPPP3     | chr16 | 67424925/C//T       | nonsynonymous | 1 | 0 |
| ESRP2     | chr16 | 68265073/G//A       | synonymous    | 1 | 0 |
| HYDIN     | chr16 | 70906055/C//A       | nonsynonymous | 1 | 0 |
| CDYL2     | chr16 | 80718975/G//C       | nonsynonymous | 1 | 0 |
| FBXO31    | chr16 | 87369787/C//T       | nonsynonymous | 1 | 0 |
| ANKFY1    | chr17 | 4074136/C//T        | nonsynonymous | 1 | 0 |
| C17orf107 | chr17 | 4805130/G//A        | synonymous    | 1 | 0 |
| POLR2A    | chr17 | 7401049/G//A        | synonymous    | 1 | 0 |
| MYH4      | chr17 | 10366429/G//A       | synonymous    | 1 | 0 |
| NF1       | chr17 | 29496952/C//G       | nonsynonymous | 1 | 0 |
| C17orf50  | chr17 | 34091073/G//C       | nonsynonymous | 1 | 0 |
| KRT25     | chr17 | 38906791/G//A       | nonsynonymous | 1 | 0 |
| KLHL10    | chr17 | 40004265/C//T       | synonymous    | 1 | 0 |
| CHAD      | chr17 | 48545832/G//A       | nonsynonymous | 1 | 0 |
| EPN3      | chr17 | 48616632/G//C       | nonsynonymous | 1 | 0 |
| ERN1      | chr17 | 62130266/G//C       | nonsynonymous | 1 | 0 |
| ERN1      | chr17 | 62130278/G//C       | nonsynonymous | 1 | 0 |
| ABCA6     | chr17 | 67092423/T//C       | synonymous    | 1 | 0 |
| ABCA6     | chr17 | 67092434/T//C       | nonsynonymous | 1 | 0 |
| USP14     | chr18 | 210474/A//G         | synonymous    | 1 | 0 |
| MTCL1     | chr18 | 8783697/C//G        | nonsynonymous | 1 | 0 |
| ZNF521    | chr18 | 22804644/G//A       | synonymous    | 1 | 0 |
| ZNF521    | chr18 | 22804647/C//A       | nonsynonymous | 1 | 0 |
| SOCS6     | chr18 | 67993270/G//C       | nonsynonymous | 1 | 0 |
| TMIGD2    | chr19 | 4292691/G//T        | nonsynonymous | 1 | 0 |
| PLIN5     | chr19 | 4534063/C//T        | synonymous    | 1 | 0 |
| TRIP10    | chr19 | 6751159/C//G        | synonymous    | 1 | 0 |
| MUC16     | chr19 | 9073852/G//T        | nonsynonymous | 1 | 0 |
| ICAM1     | chr19 | 10395209/G//A       | synonymous    | 1 | 0 |
| LDLR      | chr19 | 11227573/C//A       | nonsynonymous | 1 | 0 |
| OR10H2    | chr19 | 15839630/C//G       | nonsynonymous | 1 | 0 |
| BABAM1    | chr19 | 17382409/A//G       | nonsynonymous | 1 | 0 |
| DDA1      | chr19 | 17424889/G//A       | nonsynonymous | 1 | 0 |
| KLHL26    | chr19 | 18779580/C//T       | nonsynonymous | 1 | 0 |
| PDCD5     | chr19 | 33078225/C//T       | synonymous    | 1 | 0 |
| B3GNT8    | chr19 | 41932536/G//T       | nonsynonymous | 1 | 0 |
| TMEM145   | chr19 | 42827751/C//T       | nonsynonymous | 1 | 0 |
| PSG7      | chr19 | 43439924/A//G       | synonymous    | 1 | 0 |
| CD3EAP    | chr19 | 45911557/C//A       | nonsynonymous | 1 | 0 |
| NTN5      | chr19 | 49167063/C//G       | nonsynonymous | 1 | 0 |
| PPFIA3    | chr19 | 49636324/C//G       | nonsynonymous | 1 | 0 |
| TRPM4     | chr19 | 49691973/G//C       | nonsynonymous | 1 | 0 |
| PNKP      | chr19 | 50364953/C//G       | nonsynonymous | 1 | 0 |
| ZNF766    | chr19 | 52793492/C//G       | nonsynonymous | 1 | 0 |
| ZNF611    | chr19 | 53208318/G//A       | nonsynonymous | 1 | 0 |
| ZNF835    | chr19 | 57175103/C//T       | synonymous    | 1 | 0 |
| ZNF256    | chr19 | 58455348/C//G       | synonymous    | 1 | 0 |
| KAT14     | chr20 | 18143353/C//G       | nonsynonymous | 1 | 0 |
| PREX1     | chr20 | 47253165/C//G       | nonsynonymous | 1 | 0 |
| BMP7      | chr20 | 55746009/G//A       | synonymous    | 1 | 0 |
| PHACTR3   | chr20 | 58415419/C//T       | synonymous    | 1 | 0 |
| CABLES2   | chr20 | 60966347/G//C       | nonsynonymous | 1 | 0 |
| TCFL5     | chr20 | 61473367/TGTGCAG//T | nonsynonymous | 1 | 0 |
| CHAF1B    | chr21 | 37785511/C//T       | nonsynonymous | 1 | 0 |
| PCNT      | chr21 | 47831296/G//A       | nonsynonymous | 1 | 0 |
| CECR2     | chr22 | 18021615/C//T       | nonsynonymous | 1 | 0 |
| SNAP29    | chr22 | 21213488/C//G       | nonsynonymous | 1 | 0 |
| MICALL1   | chr22 | 38318186/C//T       | synonymous    | 1 | 0 |
| RPL3      | chr22 | 39710697/G//T       | nonsynonymous | 1 | 0 |
| RPS19BP1  | chr22 | 39928758/C//T       | synonymous    | 1 | 0 |
| PHKA2     | chrX  | 18924697/G//A       | nonsynonymous | 1 | 0 |
| MED14     | chrX  | 40522245/G//C       | nonsynonymous | 1 | 0 |
| SLITRK4   | chrX  | 142718488/A//G      | nonsynonymous | 1 | 0 |
| PTPN22    | chr1  | 114397664/C//T      | nonsynonymous | 0 | 1 |
| GDF7      | chr2  | 20870897/C//T       | synonymous    | 0 | 1 |



|              |       |                |               |   |   |
|--------------|-------|----------------|---------------|---|---|
| DNAH6        | chr2  | 84811376/T//A  | nonsynonymous | 0 | 1 |
| IPCEF1       | chr6  | 154533903/C//A | nonsynonymous | 0 | 1 |
| OSBPL3       | chr7  | 24843993/C//T  | synonymous    | 0 | 1 |
| NUCB2        | chr11 | 17352482/C//G  | nonsynonymous | 0 | 1 |
| MTNR1B       | chr11 | 92703025/C//T  | nonsynonymous | 0 | 1 |
| KRT4         | chr12 | 53207759/A//T  | synonymous    | 0 | 1 |
| ARHGEF40     | chr14 | 21549107/G//A  | nonsynonymous | 0 | 1 |
| ADCY9        | chr16 | 4163864/C//T   | nonsynonymous | 0 | 1 |
| ZNF714       | chr19 | 21300853/C//T  | synonymous    | 0 | 1 |
| ZNF208       | chr19 | 22153917/T//C  | synonymous    | 0 | 1 |
| MED29        | chr19 | 39888400/A//G  | synonymous    | 0 | 1 |
| IGLON5       | chr19 | 51831093/G//A  | nonsynonymous | 0 | 1 |
| XRCC6        | chr22 | 42046836/A//G  | nonsynonymous | 0 | 1 |
| MXRA5        | chrX  | 3228449/C//T   | nonsynonymous | 0 | 1 |
| DCAF12L1     | chrX  | 125685851/C//A | synonymous    | 0 | 1 |
| ARHGEF6      | chrX  | 135764105/G//A | nonsynonymous | 0 | 1 |
| MAST4        | chr5  | 66459566/G//A  | nonsynonymous | 1 | 0 |
| BAZ1A        | chr14 | 35269495/T//A  | nonsynonymous | 1 | 0 |
| SYNE2        | chr14 | 64488666/A//G  | nonsynonymous | 1 | 0 |
| BTBD7        | chr14 | 93761226/T//C  | nonsynonymous | 1 | 0 |
| PPP1R13B     | chr14 | 104209054/G//A | synonymous    | 1 | 0 |
| AHNAK2       | chr14 | 105405542/G//A | nonsynonymous | 1 | 0 |
| SMAD6        | chr15 | 66996033/C//T  | nonsynonymous | 1 | 0 |
| LOC100506388 | chr17 | 182928/C//A    | synonymous    | 1 | 0 |
| UNC45B       | chr17 | 33503014/A//G  | synonymous    | 1 | 0 |
| RBBP8        | chr18 | 20548821/A//G  | nonsynonymous | 1 | 0 |
| OR7C1        | chr19 | 14910531/G//C  | nonsynonymous | 1 | 0 |
| ZBTB40       | chr1  | 22852920/G//A  | synonymous    | 0 | 1 |
| ZNHIT6       | chr1  | 86171980/T//C  | nonsynonymous | 0 | 1 |
| DPYD         | chr1  | 97981309/G//T  | synonymous    | 0 | 1 |
| GLUL         | chr1  | 182354907/G//T | synonymous    | 0 | 1 |
| RPS6KC1      | chr1  | 213303064/C//T | nonsynonymous | 0 | 1 |
| GDF7         | chr2  | 20870478/G//T  | nonsynonymous | 0 | 1 |
| PLB1         | chr2  | 28812545/G//T  | nonsynonymous | 0 | 1 |
| PHOSPHO2     | chr2  | 170557486/A//G | nonsynonymous | 0 | 1 |
| TTN          | chr2  | 179605569/A//T | nonsynonymous | 0 | 1 |
| CRYGC        | chr2  | 208993033/C//T | nonsynonymous | 0 | 1 |
| SCN10A       | chr3  | 38739123/C//T  | nonsynonymous | 0 | 1 |
| KALRN        | chr3  | 124380731/C//T | nonsynonymous | 0 | 1 |
| GATA2        | chr3  | 128205115/G//A | nonsynonymous | 0 | 1 |
| SLC7A14      | chr3  | 170198349/G//T | synonymous    | 0 | 1 |
| BST1         | chr4  | 15704955/G//A  | nonsynonymous | 0 | 1 |
| KLF3         | chr4  | 38690369/C//T  | nonsynonymous | 0 | 1 |
| RASGEF1B     | chr4  | 82355053/A//T  | nonsynonymous | 0 | 1 |
| LARP1B       | chr4  | 129028426/T//G | nonsynonymous | 0 | 1 |
| PCDH10       | chr4  | 134071517/C//T | synonymous    | 0 | 1 |
| SPOCK3       | chr4  | 167983675/C//T | nonsynonymous | 0 | 1 |
| VEGFC        | chr4  | 177649053/A//G | nonsynonymous | 0 | 1 |
| FBN2         | chr5  | 127686594/G//A | synonymous    | 0 | 1 |
| BRD8         | chr5  | 137503684/C//A | nonsynonymous | 0 | 1 |
| PCDHAC1      | chr5  | 140307474/G//A | nonsynonymous | 0 | 1 |
| TENM2        | chr5  | 167645618/G//T | nonsynonymous | 0 | 1 |
| JARID2       | chr6  | 15507592/C//G  | synonymous    | 0 | 1 |
| EHMT2        | chr6  | 31852191/G//A  | nonsynonymous | 0 | 1 |
| SOBP         | chr6  | 107955548/G//A | synonymous    | 0 | 1 |
|              | chr6  | 128330421/G//T | synonymous    | 0 | 1 |
| MTHFD1L      | chr6  | 151247339/T//C | synonymous    | 0 | 1 |
| LPA          | chr6  | 160958890/G//T | nonsynonymous | 0 | 1 |
| BBS9         | chr7  | 33297025/A//G  | synonymous    | 0 | 1 |
| ABCA13       | chr7  | 48626793/C//T  | nonsynonymous | 0 | 1 |
| TECPR1       | chr7  | 97854396/C//A  | synonymous    | 0 | 1 |
| ZAN          | chr7  | 100356153/G//A | nonsynonymous | 0 | 1 |
| IFNA6        | chr9  | 21350872/A//G  | synonymous    | 0 | 1 |
| TAF1L        | chr9  | 32631814/C//T  | nonsynonymous | 0 | 1 |
| OR13D1       | chr9  | 107457487/G//C | nonsynonymous | 0 | 1 |
| OLFML2A      | chr9  | 127561615/C//T | nonsynonymous | 0 | 1 |
| KIAA1462     | chr10 | 30318048/C//T  | synonymous    | 0 | 1 |
| INA          | chr10 | 105036950/C//T | synonymous    | 0 | 1 |
| JAKMIP3      | chr10 | 133980544/T//G | synonymous    | 0 | 1 |
| SPON1        | chr11 | 14284464/C//T  | nonsynonymous | 0 | 1 |

|          |       |                |               |   |   |
|----------|-------|----------------|---------------|---|---|
| NAV2     | chr11 | 19954790/G//A  | nonsynonymous | 0 | 1 |
| MS4A1    | chr11 | 60230542/T//C  | nonsynonymous | 0 | 1 |
| SRSF8    | chr11 | 94800918/A//C  | synonymous    | 0 | 1 |
| ATM      | chr11 | 108203625/G//T | nonsynonymous | 0 | 1 |
| ITFG2    | chr12 | 2932038/C//T   | nonsynonymous | 0 | 1 |
| ACSM4    | chr12 | 7477149/T//A   | synonymous    | 0 | 1 |
| PHC1     | chr12 | 9085283/G//T   | synonymous    | 0 | 1 |
| KLRC2    | chr12 | 10583820/C//T  | nonsynonymous | 0 | 1 |
| BICD1    | chr12 | 32481245/G//A  | nonsynonymous | 0 | 1 |
| DNM1L    | chr12 | 32832340/T//C  | nonsynonymous | 0 | 1 |
| TUBA1A   | chr12 | 49582843/G//T  | synonymous    | 0 | 1 |
| LRP1     | chr12 | 57599465/C//G  | synonymous    | 0 | 1 |
| LHX5     | chr12 | 113901367/G//A | synonymous    | 0 | 1 |
| SHISA2   | chr13 | 26621109/G//A  | nonsynonymous | 0 | 1 |
| VSX2     | chr14 | 74706361/G//A  | nonsynonymous | 0 | 1 |
| DIO3     | chr14 | 102028652/C//T | synonymous    | 0 | 1 |
| CEP152   | chr15 | 49060527/T//C  | nonsynonymous | 0 | 1 |
| NTRK3    | chr15 | 88472649/C//T  | nonsynonymous | 0 | 1 |
| WDR90    | chr16 | 705326/G//A    | nonsynonymous | 0 | 1 |
| MSRB1    | chr16 | 1993167/G//A   | synonymous    | 0 | 1 |
| CCP110   | chr16 | 19548388/G//T  | nonsynonymous | 0 | 1 |
| DNAH3    | chr16 | 21060982/C//T  | nonsynonymous | 0 | 1 |
| PRMT7    | chr16 | 68382273/A//T  | nonsynonymous | 0 | 1 |
| ABCA10   | chr17 | 67146120/C//G  | synonymous    | 0 | 1 |
| LOXHD1   | chr18 | 44121805/C//T  | nonsynonymous | 0 | 1 |
| ZNF532   | chr18 | 56587348/C//T  | nonsynonymous | 0 | 1 |
| TSHZ3    | chr19 | 31768624/T//G  | nonsynonymous | 0 | 1 |
| TSHZ3    | chr19 | 31768640/G//T  | nonsynonymous | 0 | 1 |
| CD22     | chr19 | 35837695/G//A  | synonymous    | 0 | 1 |
| HAUS5    | chr19 | 36109316/G//A  | synonymous    | 0 | 1 |
| CLIP3    | chr19 | 36507118/G//A  | synonymous    | 0 | 1 |
| SPRED3   | chr19 | 38880956/G//A  | nonsynonymous | 0 | 1 |
| PLEKHA4  | chr19 | 49348816/G//A  | nonsynonymous | 0 | 1 |
| NLRP5    | chr19 | 56511154/G//A  | nonsynonymous | 0 | 1 |
| NKX2-4   | chr20 | 21376793/C//T  | nonsynonymous | 0 | 1 |
| ZBTB46   | chr20 | 62407156/G//A  | nonsynonymous | 0 | 1 |
| TOP3B    | chr22 | 22326297/G//A  | synonymous    | 0 | 1 |
| MEI1     | chr22 | 42189884/G//C  | nonsynonymous | 0 | 1 |
| FBLN1    | chr22 | 45944486/G//A  | synonymous    | 0 | 1 |
| IL3RA    | chrX  | 1471272/C//T   | synonymous    | 0 | 1 |
| USP9X    | chrX  | 41025363/C//T  | nonsynonymous | 0 | 1 |
| BCORL1   | chrX  | 129148993/G//T | nonsynonymous | 0 | 1 |
| GPR50    | chrX  | 150349664/C//A | nonsynonymous | 0 | 1 |
| PIK3CD   | chr1  | 9784478/C//T   | nonsynonymous | 0 | 1 |
| ASB17    | chr1  | 76397784/C//T  | nonsynonymous | 0 | 1 |
| IRF6     | chr1  | 209964203/G//A | nonsynonymous | 0 | 1 |
| DNAH6    | chr2  | 84804474/T//C  | nonsynonymous | 0 | 1 |
| RMND5A   | chr2  | 86968045/T//A  | synonymous    | 0 | 1 |
| TTN      | chr2  | 179575433/G//A | nonsynonymous | 0 | 1 |
| BRPF1    | chr3  | 9784744/C//T   | synonymous    | 0 | 1 |
| KBTBD12  | chr3  | 127642773/G//C | nonsynonymous | 0 | 1 |
|          | chr3  | 178984599/C//T | synonymous    | 0 | 1 |
| LG12     | chr4  | 25014073/G//A  | nonsynonymous | 0 | 1 |
| PLK4     | chr4  | 128802215/G//A | synonymous    | 0 | 1 |
| ADAMTS16 | chr5  | 5182287/C//A   | nonsynonymous | 0 | 1 |
| APC      | chr5  | 112111354/G//T | nonsynonymous | 0 | 1 |
| SEMA6A   | chr5  | 115840540/C//T | nonsynonymous | 0 | 1 |
| TXNDC15  | chr5  | 134223822/A//C | nonsynonymous | 0 | 1 |
| HIST1H4L | chr6  | 27841253/G//A  | synonymous    | 0 | 1 |
| TAAR2    | chr6  | 132938394/G//T | nonsynonymous | 0 | 1 |
| SYNE1    | chr6  | 152725390/C//G | synonymous    | 0 | 1 |
| MAGI2    | chr7  | 78636403/C//G  | synonymous    | 0 | 1 |
| CSMD1    | chr8  | 3611512/G//A   | nonsynonymous | 0 | 1 |
| UBXN8    | chr8  | 30612264/C//T  | nonsynonymous | 0 | 1 |
| CCDC107  | chr9  | 35658340/G//A  | synonymous    | 0 | 1 |
| PNLIPRP1 | chr10 | 118360611/G//A | nonsynonymous | 0 | 1 |
| FOLR3    | chr11 | 71850797/C//T  | synonymous    | 0 | 1 |
| TRHDE    | chr12 | 73056901/G//A  | nonsynonymous | 0 | 1 |
| SDS      | chr12 | 113836598/C//T | nonsynonymous | 0 | 1 |
| KLHL1    | chr13 | 70535512/T//C  | nonsynonymous | 0 | 1 |

|           |       |                 |               |   |   |
|-----------|-------|-----------------|---------------|---|---|
| SLITRK6   | chr13 | 86369681/G//C   | synonymous    | 0 | 1 |
| TMTC4     | chr13 | 101278382/T//C  | nonsynonymous | 0 | 1 |
| FAM177A1  | chr14 | 35550459/A//T   | synonymous    | 0 | 1 |
|           | chr14 | 79746837/C//CT  | synonymous    | 0 | 1 |
| SHC4      | chr15 | 49127200/C//A   | nonsynonymous | 0 | 1 |
| HS3ST4    | chr16 | 26147192/C//T   | nonsynonymous | 0 | 1 |
| ALDH3A1   | chr17 | 19641771/G//A   | synonymous    | 0 | 1 |
| HOXB3     | chr17 | 46629809/C//T   | nonsynonymous | 0 | 1 |
| LOXHD1    | chr18 | 44057729/C//T   | synonymous    | 0 | 1 |
| ZNF433    | chr19 | 12125995/C//T   | nonsynonymous | 0 | 1 |
| CILP2     | chr19 | 19654863/C//T   | synonymous    | 0 | 1 |
| TTC9B     | chr19 | 40724038/G//A   | nonsynonymous | 0 | 1 |
| SAMD10    | chr20 | 62608427/G//A   | synonymous    | 0 | 1 |
| DSCAM     | chr21 | 41710235/G//A   | nonsynonymous | 0 | 1 |
| SHANK3    | chr22 | 51169172/T//C   | nonsynonymous | 0 | 1 |
| NUDC      | chr1  | 27272169/T//C   | synonymous    | 0 | 1 |
| IGSF3     | chr1  | 117146268/A//G  | synonymous    | 0 | 1 |
| TBCE      | chr1  | 235599161/T//G  | synonymous    | 0 | 1 |
| THSD7B    | chr2  | 137814006/T//A  | nonsynonymous | 0 | 1 |
| ALPI      | chr2  | 233321977/G//T  | nonsynonymous | 0 | 1 |
| PCDH10    | chr4  | 134084409/G//A  | synonymous    | 0 | 1 |
| IRX1      | chr5  | 3599510/C//T    | nonsynonymous | 0 | 1 |
| TMED4     | chr7  | 44620760/G//C   | nonsynonymous | 0 | 1 |
| ZNF705G   | chr8  | 7215812/C//T    | nonsynonymous | 0 | 1 |
| HAUS6     | chr9  | 19082998/A//C   | nonsynonymous | 0 | 1 |
| PDCD4     | chr10 | 112635836/A//G  | synonymous    | 0 | 1 |
| CLEC4A    | chr12 | 8276483/G//A    | synonymous    | 0 | 1 |
| MAP1A     | chr15 | 43821123/G//C   | synonymous    | 0 | 1 |
| MAP1A     | chr15 | 43821125/C//G   | nonsynonymous | 0 | 1 |
| POLG      | chr15 | 89876861/C//T   | nonsynonymous | 0 | 1 |
| SRRM2     | chr16 | 2819213/C//T    | nonsynonymous | 0 | 1 |
| KIFC3     | chr16 | 57803585/G//A   | synonymous    | 0 | 1 |
| DVL2      | chr17 | 7137551/C//A    | nonsynonymous | 0 | 1 |
| MED1      | chr17 | 37566602/AG//A  | nonsynonymous | 0 | 1 |
| SGSH      | chr17 | 78185988/G//A   | synonymous    | 0 | 1 |
| FAM71E2   | chr19 | 55870520/A//T   | synonymous    | 0 | 1 |
| ZSCAN22   | chr19 | 58850710/G//A   | synonymous    | 0 | 1 |
| ADGRB2    | chr1  | 32196442/G//A   | nonsynonymous | 0 | 1 |
| HCN3      | chr1  | 155258051/C//T  | nonsynonymous | 0 | 1 |
| UBQLN4    | chr1  | 156021547/G//A  | synonymous    | 0 | 1 |
| BRINP2    | chr1  | 177198978/C//T  | synonymous    | 0 | 1 |
| ALMS1     | chr2  | 73827844/G//A   | nonsynonymous | 0 | 1 |
| COL6A3    | chr2  | 238277378/C//A  | synonymous    | 0 | 1 |
| TWIST2    | chr2  | 239757059/G//A  | nonsynonymous | 0 | 1 |
| PRRT3     | chr3  | 9991145/T//C    | nonsynonymous | 0 | 1 |
| ADGRA3    | chr4  | 22389403/C//T   | synonymous    | 0 | 1 |
| NPFFR2    | chr4  | 73003776/G//A   | synonymous    | 0 | 1 |
| USO1      | chr4  | 76725353/A//G   | nonsynonymous | 0 | 1 |
| SEPT11    | chr4  | 77949872/A//G   | synonymous    | 0 | 1 |
| PRDM9     | chr5  | 23510135/A//T   | nonsynonymous | 0 | 1 |
| C7        | chr5  | 40972656/G//T   | nonsynonymous | 0 | 1 |
| ISL1      | chr5  | 50685738/T//C   | nonsynonymous | 0 | 1 |
| MCTP1     | chr5  | 94253682/G//T   | synonymous    | 0 | 1 |
| CAMK4     | chr5  | 110819898/G//A  | nonsynonymous | 0 | 1 |
| APC       | chr5  | 112175145/A//AT | nonsynonymous | 0 | 1 |
| PCDHB11   | chr5  | 140581615/G//A  | synonymous    | 0 | 1 |
| HIST1H2BD | chr6  | 26158611/G//C   | nonsynonymous | 0 | 1 |
| LPA       | chr6  | 161085267/C//T  | synonymous    | 0 | 1 |
| LPA       | chr6  | 161085295/A//G  | synonymous    | 0 | 1 |
| TNRC18    | chr7  | 5372346/C//T    | synonymous    | 0 | 1 |
| ZNF479    | chr7  | 57188200/C//A   | nonsynonymous | 0 | 1 |
| KCP       | chr7  | 128531004/G//T  | nonsynonymous | 0 | 1 |
| OR2A5     | chr7  | 143748195/G//A  | nonsynonymous | 0 | 1 |
| DLGAP2    | chr8  | 1496882/G//A    | nonsynonymous | 0 | 1 |
| FGFR1     | chr8  | 38274873/G//A   | synonymous    | 0 | 1 |
| C9orf47   | chr9  | 91605803/C//T   | synonymous    | 0 | 1 |
| DENND1A   | chr9  | 126319981/A//G  | synonymous    | 0 | 1 |
| FGF8      | chr10 | 103530314/C//T  | synonymous    | 0 | 1 |
| SMNDC1    | chr10 | 112058411/A//G  | synonymous    | 0 | 1 |
| RIC8A     | chr11 | 208728/C//T     | synonymous    | 0 | 1 |

|           |       |                          |               |   |   |
|-----------|-------|--------------------------|---------------|---|---|
| HPD       | chr12 | 122277638/A//G           | nonsynonymous | 0 | 1 |
| GSC       | chr14 | 95234970/C//CA           | nonsynonymous | 0 | 1 |
| MAGEL2    | chr15 | 23892671/G//A            | synonymous    | 0 | 1 |
| ZNF106    | chr15 | 42742213/T//C            | nonsynonymous | 0 | 1 |
| TRPM7     | chr15 | 50875281/C//A            | synonymous    | 0 | 1 |
| TMC3      | chr15 | 81651776/A//C            | nonsynonymous | 0 | 1 |
| TUFM      | chr16 | 28857638/CAGA//C         | synonymous    | 0 | 1 |
| JPH3      | chr16 | 87636782/C//T            | synonymous    | 0 | 1 |
| TEKT1     | chr17 | 6719159/T//C             | nonsynonymous | 0 | 1 |
| DBF4B     | chr17 | 42828503/C//T            | nonsynonymous | 0 | 1 |
| ADCYAP1   | chr18 | 909533/G//A              | nonsynonymous | 0 | 1 |
| C18orf8   | chr18 | 21083555/G//A            | synonymous    | 0 | 1 |
| GPX4      | chr19 | 1104121/A//G             | nonsynonymous | 0 | 1 |
| DCAF15    | chr19 | 14071820/C//T            | synonymous    | 0 | 1 |
|           | chr19 | 41066381/C//T            | synonymous    | 0 | 1 |
|           | chr20 | 48732132/G//A            | synonymous    | 0 | 1 |
| CDH4      | chr20 | 60485505/G//A            | nonsynonymous | 0 | 1 |
| C21orf62  | chr21 | 34166740/C//T            | synonymous    | 0 | 1 |
| TRPM2     | chr21 | 45846968/G//A            | synonymous    | 0 | 1 |
| RNF215    | chr22 | 30783097/T//C            | nonsynonymous | 0 | 1 |
| TNRC6B    | chr22 | 40673147/G//T            | nonsynonymous | 0 | 1 |
| TAF1      | chrX  | 70596914/AGGAAGCAACACAGG | nonsynonymous | 0 | 1 |
| GPR88     | chr1  | 101005074/C//T           | synonymous    | 0 | 1 |
| DENND2D   | chr1  | 111734882/C//T           | synonymous    | 0 | 1 |
| LRRTM4    | chr2  | 76975878/G//A            | synonymous    | 0 | 1 |
| EIF5B     | chr2  | 99953958/A//G            | synonymous    | 0 | 1 |
| PDE11A    | chr2  | 178704994/G//A           | nonsynonymous | 0 | 1 |
| FAM171B   | chr2  | 187618753/C//T           | nonsynonymous | 0 | 1 |
| COL3A1    | chr2  | 189859318/C//T           | nonsynonymous | 0 | 1 |
| GBX2      | chr2  | 237074648/C//T           | nonsynonymous | 0 | 1 |
| CCNL1     | chr3  | 156877986/G//T           | synonymous    | 0 | 1 |
| C4orf22   | chr4  | 81256976/C//T            | synonymous    | 0 | 1 |
| LMNB1     | chr5  | 126141282/C//T           | nonsynonymous | 0 | 1 |
| FOX11     | chr5  | 169535487/T//C           | nonsynonymous | 0 | 1 |
| SYNE1     | chr6  | 152804264/C//T           | nonsynonymous | 0 | 1 |
| ADAMDEC1  | chr8  | 24256552/A//C            | nonsynonymous | 0 | 1 |
| PURG      | chr8  | 30890254/G//A            | synonymous    | 0 | 1 |
| WRN       | chr8  | 30922424/G//A            | synonymous    | 0 | 1 |
| UBR5      | chr8  | 103424470/T//C           | synonymous    | 0 | 1 |
| PSMA1     | chr11 | 14536002/A//G            | nonsynonymous | 0 | 1 |
| RAG1      | chr11 | 36596373/C//T            | nonsynonymous | 0 | 1 |
| FAT3      | chr11 | 92531160/G//A            | nonsynonymous | 0 | 1 |
| PDE3A     | chr12 | 20833032/A//T            | nonsynonymous | 0 | 1 |
| DPY19L2   | chr12 | 63954278/G//T            | synonymous    | 0 | 1 |
| PNP       | chr14 | 20944576/G//A            | nonsynonymous | 0 | 1 |
| DUOXA2    | chr15 | 45408760/G//A            | synonymous    | 0 | 1 |
| TSPD1     | chr16 | 1306973/A//G             | nonsynonymous | 0 | 1 |
| DDX19B    | chr16 | 70333255/T//C            | nonsynonymous | 0 | 1 |
| PTPRS     | chr19 | 5245794/C//T             | synonymous    | 0 | 1 |
| ZNF430    | chr19 | 21240831/T//A            | synonymous    | 0 | 1 |
| ZNF135    | chr19 | 58570640/G//A            | synonymous    | 0 | 1 |
|           | chr2  | 27592873/G//A            | synonymous    | 0 | 1 |
| C2orf54   | chr2  | 241831142/G//A           | nonsynonymous | 0 | 1 |
| TMEM158   | chr3  | 45267352/G//C            | synonymous    | 0 | 1 |
| DCUN1D1   | chr3  | 182683473/T//C           | synonymous    | 0 | 1 |
| IGF2BP2   | chr3  | 185410517/A//G           | nonsynonymous | 0 | 1 |
| MUC17     | chr7  | 100680571/C//T           | synonymous    | 0 | 1 |
| MUC17     | chr7  | 100680587/A//G           | nonsynonymous | 0 | 1 |
| KCNB2     | chr8  | 73480147/C//T            | nonsynonymous | 0 | 1 |
| ZC3H3     | chr8  | 144557739/G//A           | nonsynonymous | 0 | 1 |
| SPATA31C1 | chr9  | 90534206/T//C            | nonsynonymous | 0 | 1 |
| MRPL51    | chr12 | 6602313/T//TCCCC         | synonymous    | 0 | 1 |
| ACTR10    | chr14 | 58701118/T//C            | nonsynonymous | 0 | 1 |
| LIPC      | chr15 | 58834078/T//C            | nonsynonymous | 0 | 1 |
| C16orf58  | chr16 | 31504842/A//G            | nonsynonymous | 0 | 1 |
| ZNF652    | chr17 | 47375931/G//C            | nonsynonymous | 0 | 1 |
| APLP1     | chr19 | 36365454/C//T            | nonsynonymous | 0 | 1 |
| ZNF850    | chr19 | 37240387/C//T            | nonsynonymous | 0 | 1 |
| ZNF665    | chr19 | 53668200/T//C            | nonsynonymous | 0 | 1 |
| MCM3AP    | chr21 | 47704043/T//C            | synonymous    | 0 | 1 |

|           |      |                  |               |   |   |
|-----------|------|------------------|---------------|---|---|
| DCAF8L1   | chrX | 27998721/T//C    | nonsynonymous | 0 | 1 |
| UBA1      | chrX | 47062165/A//G    | synonymous    | 0 | 1 |
| NHSL2     | chrX | 71363224/G//T    | nonsynonymous | 0 | 1 |
| THOC2     | chrX | 122765652/T//C   | nonsynonymous | 0 | 1 |
| SAMD11    | chr1 | 878199/C//T      | nonsynonymous | 0 | 1 |
| PLEKHN1   | chr1 | 909351/G//A      | nonsynonymous | 0 | 1 |
| CCNL2     | chr1 | 1333703/A//G     | nonsynonymous | 0 | 1 |
| PRKCZ     | chr1 | 2082319/C//T     | nonsynonymous | 0 | 1 |
| MORN1     | chr1 | 2268202/G//A     | nonsynonymous | 0 | 1 |
| TNFRSF9   | chr1 | 7980847/T//C     | synonymous    | 0 | 1 |
| UBE4B     | chr1 | 10155612/G//A    | nonsynonymous | 0 | 1 |
| OTUD3     | chr1 | 20224037/G//A    | nonsynonymous | 0 | 1 |
| OTUD3     | chr1 | 20231407/C//T    | synonymous    | 0 | 1 |
| MYOM3     | chr1 | 24417349/A//G    | nonsynonymous | 0 | 1 |
| SRRM1     | chr1 | 24995972/G//A    | nonsynonymous | 0 | 1 |
| CNKSR1    | chr1 | 26508877/G//A    | nonsynonymous | 0 | 1 |
| ARID1A    | chr1 | 27057801/G//A    | synonymous    | 0 | 1 |
| OPRD1     | chr1 | 29138971/G//A    | nonsynonymous | 0 | 1 |
| COL16A1   | chr1 | 32131521/G//A    | nonsynonymous | 0 | 1 |
|           | chr1 | 38227015/T//A    | synonymous    | 0 | 1 |
| RIMKLA    | chr1 | 42880572/C//T    | nonsynonymous | 0 | 1 |
| ZMYND12   | chr1 | 42915598/C//G    | nonsynonymous | 0 | 1 |
| SZT2      | chr1 | 43906230/G//A    | synonymous    | 0 | 1 |
| KDM4A     | chr1 | 44160566/G//A    | nonsynonymous | 0 | 1 |
| CCDC24    | chr1 | 44457614/C//T    | nonsynonymous | 0 | 1 |
| SLC6A9    | chr1 | 44482838/C//T    | synonymous    | 0 | 1 |
| CYP4B1    | chr1 | 47276601/A//C    | nonsynonymous | 0 | 1 |
| ACOT11    | chr1 | 55069616/G//A    | synonymous    | 0 | 1 |
| MROH7     | chr1 | 55138759/C//A    | synonymous    | 0 | 1 |
| TACSTD2   | chr1 | 59042681/C//A    | nonsynonymous | 0 | 1 |
| LRR1Q3    | chr1 | 74492601/T//A    | nonsynonymous | 0 | 1 |
| ODF2L     | chr1 | 86841988/A//G    | synonymous    | 0 | 1 |
| BARHL2    | chr1 | 91182512/C//T    | nonsynonymous | 0 | 1 |
| ATP1A1    | chr1 | 116916128/G//A   | synonymous    | 0 | 1 |
| TBX15     | chr1 | 119441645/C//A   | synonymous    | 0 | 1 |
| CHD1L     | chr1 | 146757979/G//A   | nonsynonymous | 0 | 1 |
| GJA8      | chr1 | 147380139/C//T   | synonymous    | 0 | 1 |
| MTMR11    | chr1 | 149901110/G//A   | nonsynonymous | 0 | 1 |
| ANXA9     | chr1 | 150956814/GCT//G | nonsynonymous | 0 | 1 |
| TNFAIP8L2 | chr1 | 151131667/C//T   | nonsynonymous | 0 | 1 |
| LCE5A     | chr1 | 152484135/C//T   | nonsynonymous | 0 | 1 |
| CRTC2     | chr1 | 153923811/G//A   | synonymous    | 0 | 1 |
| DCST2     | chr1 | 154996948/C//T   | nonsynonymous | 0 | 1 |
| TTC24     | chr1 | 156554729/G//A   | nonsynonymous | 0 | 1 |
| NES       | chr1 | 156646783/C//T   | nonsynonymous | 0 | 1 |
| INSRR     | chr1 | 156815188/G//A   | nonsynonymous | 0 | 1 |
| SPTA1     | chr1 | 158651438/C//T   | nonsynonymous | 0 | 1 |
| PYHIN1    | chr1 | 158946527/A//G   | synonymous    | 0 | 1 |
| CFAP45    | chr1 | 159842312/C//T   | nonsynonymous | 0 | 1 |
| COPA      | chr1 | 160260457/G//A   | nonsynonymous | 0 | 1 |
| NHLH1     | chr1 | 160340709/G//A   | nonsynonymous | 0 | 1 |
| CD48      | chr1 | 160654748/C//T   | nonsynonymous | 0 | 1 |
| HSPA6     | chr1 | 161496265/G//A   | nonsynonymous | 0 | 1 |
| NUF2      | chr1 | 163317624/G//A   | synonymous    | 0 | 1 |
| SUCO      | chr1 | 172558041/A//G   | synonymous    | 0 | 1 |
| RC3H1     | chr1 | 173933300/A//G   | nonsynonymous | 0 | 1 |
| BRINP2    | chr1 | 177249704/C//T   | synonymous    | 0 | 1 |
| QSOX1     | chr1 | 180153164/C//T   | nonsynonymous | 0 | 1 |
| ZNF648    | chr1 | 182025929/C//T   | nonsynonymous | 0 | 1 |
| LAMC1     | chr1 | 183105726/C//T   | synonymous    | 0 | 1 |
| NMNAT2    | chr1 | 183253929/T//C   | synonymous    | 0 | 1 |
| NCF2      | chr1 | 183556087/T//C   | nonsynonymous | 0 | 1 |
| TRMT1L    | chr1 | 185112528/G//A   | nonsynonymous | 0 | 1 |
| HMCN1     | chr1 | 185878496/C//T   | nonsynonymous | 0 | 1 |
| HMCN1     | chr1 | 186057797/C//T   | nonsynonymous | 0 | 1 |
| HMCN1     | chr1 | 186123088/G//T   | synonymous    | 0 | 1 |
| KIF21B    | chr1 | 200972715/G//A   | nonsynonymous | 0 | 1 |
| PKP1      | chr1 | 201289496/G//A   | nonsynonymous | 0 | 1 |
| PKP1      | chr1 | 201293684/C//T   | synonymous    | 0 | 1 |
| PPP1R12B  | chr1 | 202385972/G//A   | nonsynonymous | 0 | 1 |

|            |      |                   |               |   |   |
|------------|------|-------------------|---------------|---|---|
| PIK3C2B    | chr1 | 204418312/C//T    | nonsynonymous | 0 | 1 |
| DSTYK      | chr1 | 205116802/C//A    | nonsynonymous | 0 | 1 |
| PLXNA2     | chr1 | 208215630/T//A    | nonsynonymous | 0 | 1 |
| SPATA17    | chr1 | 217856639/C//A    | nonsynonymous | 0 | 1 |
|            | chr1 | 222922755/C//T    | synonymous    | 0 | 1 |
| PARP1      | chr1 | 226573298/G//A    | synonymous    | 0 | 1 |
| CDC42BPA   | chr1 | 227181944/C//T    | synonymous    | 0 | 1 |
| MAP10      | chr1 | 232941955/G//A    | nonsynonymous | 0 | 1 |
| PCNX2      | chr1 | 233121865/T//C    | synonymous    | 0 | 1 |
| ARID4B     | chr1 | 235377278/T//C    | synonymous    | 0 | 1 |
| FMN2       | chr1 | 240255915/C//T    | nonsynonymous | 0 | 1 |
| KIF26B     | chr1 | 245530503/A//G    | nonsynonymous | 0 | 1 |
| KIF26B     | chr1 | 245851576/C//T    | nonsynonymous | 0 | 1 |
| OR2L8      | chr1 | 248112665/G//A    | nonsynonymous | 0 | 1 |
| TPO        | chr2 | 1481195/G//A      | nonsynonymous | 0 | 1 |
| COLEC11    | chr2 | 3691338/C//T      | nonsynonymous | 0 | 1 |
| RHOB       | chr2 | 20647177/G//A     | synonymous    | 0 | 1 |
| ASXL2      | chr2 | 25991735/C//T     | synonymous    | 0 | 1 |
| OTOF       | chr2 | 26684696/C//A     | nonsynonymous | 0 | 1 |
| TMEM214    | chr2 | 27263686/C//T     | nonsynonymous | 0 | 1 |
| AGBL5      | chr2 | 27281318/G//A     | synonymous    | 0 | 1 |
| ABHD1      | chr2 | 27353142/T//C     | synonymous    | 0 | 1 |
| NLRC4      | chr2 | 32475512/A//G     | nonsynonymous | 0 | 1 |
| STRN       | chr2 | 37152349/G//T     | synonymous    | 0 | 1 |
| ATL2       | chr2 | 38525643/C//T     | synonymous    | 0 | 1 |
| PRKCE      | chr2 | 46203692/G//A     | synonymous    | 0 | 1 |
| MCFD2      | chr2 | 47168943/G//C     | synonymous    | 0 | 1 |
| MSH6       | chr2 | 48027332/C//T     | nonsynonymous | 0 | 1 |
| STON1      | chr2 | 48809633/T//G     | nonsynonymous | 0 | 1 |
| RTKN       | chr2 | 74657762/G//A     | synonymous    | 0 | 1 |
| CD8B       | chr2 | 87073853/G//A     | synonymous    | 0 | 1 |
| VWA3B      | chr2 | 98920243/C//A     | nonsynonymous | 0 | 1 |
| AFF3       | chr2 | 100209937/C//A    | nonsynonymous | 0 | 1 |
| IL18RAP    | chr2 | 103053711/G//A    | nonsynonymous | 0 | 1 |
| IL18RAP    | chr2 | 103067368/C//T    | nonsynonymous | 0 | 1 |
| SLC9A2     | chr2 | 103281757/A//G    | nonsynonymous | 0 | 1 |
| SLC20A1    | chr2 | 113418089/T//G    | nonsynonymous | 0 | 1 |
| CNTNAP5    | chr2 | 125504946/G//A    | nonsynonymous | 0 | 1 |
| POTEF      | chr2 | 130832934/T//A    | nonsynonymous | 0 | 1 |
| SMPD4      | chr2 | 130910926/T//C    | nonsynonymous | 0 | 1 |
| LRP1B      | chr2 | 141625226/A//G    | synonymous    | 0 | 1 |
| EPC2       | chr2 | 149528665/G//T    | nonsynonymous | 0 | 1 |
| NEB        | chr2 | 152432838/G//A    | nonsynonymous | 0 | 1 |
| NEB        | chr2 | 152534548/A//G    | nonsynonymous | 0 | 1 |
| CACNB4     | chr2 | 152728958/T//C    | nonsynonymous | 0 | 1 |
| TANC1      | chr2 | 160087093/G//A    | nonsynonymous | 0 | 1 |
| LY75-CD302 | chr2 | 160732144/G//A    | synonymous    | 0 | 1 |
| ITGB6      | chr2 | 160982913/A//G    | synonymous    | 0 | 1 |
| CSRNP3     | chr2 | 166514422/C//T    | synonymous    | 0 | 1 |
| SCN1A      | chr2 | 166903389/G//A    | nonsynonymous | 0 | 1 |
| SP5        | chr2 | 171573116/G//A    | synonymous    | 0 | 1 |
| DCAF17     | chr2 | 172325452/G//A    | nonsynonymous | 0 | 1 |
|            | chr2 | 173686678/G//A    | synonymous    | 0 | 1 |
| MTX2       | chr2 | 177134382/G//A    | nonsynonymous | 0 | 1 |
| PRKRA      | chr2 | 179308038/C//A    | nonsynonymous | 0 | 1 |
| TTN        | chr2 | 179396115/G//A    | nonsynonymous | 0 | 1 |
| TTN        | chr2 | 179476842/G//A    | nonsynonymous | 0 | 1 |
| PDE1A      | chr2 | 183070725/G//A    | nonsynonymous | 0 | 1 |
| ZNF804A    | chr2 | 185463618/G//A    | synonymous    | 0 | 1 |
| FSIP2      | chr2 | 186669432/T//G    | synonymous    | 0 | 1 |
| FAM171B    | chr2 | 187559062/A//ACAG | nonsynonymous | 0 | 1 |
| COL5A2     | chr2 | 189904278/A//G    | synonymous    | 0 | 1 |
| HIBCH      | chr2 | 191152343/A//C    | nonsynonymous | 0 | 1 |
| HECW2      | chr2 | 197086952/C//T    | nonsynonymous | 0 | 1 |
| GTF3C3     | chr2 | 197636573/C//T    | nonsynonymous | 0 | 1 |
| MAIP1      | chr2 | 200820625/C//A    | nonsynonymous | 0 | 1 |
| FZD5       | chr2 | 208632393/C//T    | synonymous    | 0 | 1 |
| IKZF2      | chr2 | 213914467/C//T    | nonsynonymous | 0 | 1 |
| IGFBP5     | chr2 | 217543673/C//T    | nonsynonymous | 0 | 1 |
| TNS1       | chr2 | 218749836/G//A    | nonsynonymous | 0 | 1 |

|           |      |                      |               |   |   |
|-----------|------|----------------------|---------------|---|---|
| CATIP-AS1 | chr2 | 219232312/A//G       | nonsynonymous | 0 | 1 |
| CTDSP1    | chr2 | 219267856/C//T       | synonymous    | 0 | 1 |
| STK16     | chr2 | 220112915/T//A       | nonsynonymous | 0 | 1 |
| EPHA4     | chr2 | 222290844/A//G       | synonymous    | 0 | 1 |
| WDFY1     | chr2 | 224770664/C//A       | nonsynonymous | 0 | 1 |
| SLC19A3   | chr2 | 228564253/T//C       | nonsynonymous | 0 | 1 |
| GIGYF2    | chr2 | 233710455/G//A       | nonsynonymous | 0 | 1 |
| TRPM8     | chr2 | 234871975/C//T       | nonsynonymous | 0 | 1 |
| OR6B3     | chr2 | 240985360/C//T       | nonsynonymous | 0 | 1 |
| ANKMY1    | chr2 | 241465688/G//A       | synonymous    | 0 | 1 |
| TRNT1     | chr3 | 3188208/G//A         | nonsynonymous | 0 | 1 |
| LRRN1     | chr3 | 3887170/A//G         | nonsynonymous | 0 | 1 |
| ITPR1     | chr3 | 4824376/C//T         | nonsynonymous | 0 | 1 |
| EDEM1     | chr3 | 5229604/G//A         | synonymous    | 0 | 1 |
| WNT7A     | chr3 | 13860616/C//T        | nonsynonymous | 0 | 1 |
| PP2D1     | chr3 | 20043179/C//T        | nonsynonymous | 0 | 1 |
| XIRP1     | chr3 | 39229709/C//T        | nonsynonymous | 0 | 1 |
|           | chr3 | 46305920/T//C        | synonymous    | 0 | 1 |
| NBEAL2    | chr3 | 47035448/G//A        | nonsynonymous | 0 | 1 |
| SCAP      | chr3 | 47459938/G//A        | nonsynonymous | 0 | 1 |
| SMARCC1   | chr3 | 47651714/T//C        | nonsynonymous | 0 | 1 |
| PLXNB1    | chr3 | 48450804/G//A        | nonsynonymous | 0 | 1 |
| PLXNB1    | chr3 | 48453975/C//T        | nonsynonymous | 0 | 1 |
| RBM6      | chr3 | 50112685/C//T        | synonymous    | 0 | 1 |
| CYB561D2  | chr3 | 50390809/C//T        | synonymous    | 0 | 1 |
| ZNF654    | chr3 | 88189029/T//C        | nonsynonymous | 0 | 1 |
| ABHD10    | chr3 | 111697936/G//A       | nonsynonymous | 0 | 1 |
| RABL3     | chr3 | 120428633/C//T       | nonsynonymous | 0 | 1 |
| EFCAB12   | chr3 | 129127507/T//C       | synonymous    | 0 | 1 |
| ALG1L2    | chr3 | 129800761/A//G       | synonymous    | 0 | 1 |
| MFSD1     | chr3 | 158546867/A//G       | synonymous    | 0 | 1 |
| MYNN      | chr3 | 169497342/T//A       | synonymous    | 0 | 1 |
| EIF5A2    | chr3 | 170612207/T//C       | nonsynonymous | 0 | 1 |
| USP13     | chr3 | 179501916/G//A       | nonsynonymous | 0 | 1 |
| PSMD2     | chr3 | 184023889/T//C       | nonsynonymous | 0 | 1 |
| MAP3K13   | chr3 | 185191267/C//A       | synonymous    | 0 | 1 |
| GP5       | chr3 | 194118248/G//A       | nonsynonymous | 0 | 1 |
| CTBP1     | chr4 | 1207295/G//A         | nonsynonymous | 0 | 1 |
| CCDC96    | chr4 | 7043169/G//A         | synonymous    | 0 | 1 |
| SLIT2     | chr4 | 20535220/G//T        | nonsynonymous | 0 | 1 |
| RFC1      | chr4 | 39329302/G//T        | nonsynonymous | 0 | 1 |
| SCFD2     | chr4 | 54218838/T//C        | nonsynonymous | 0 | 1 |
| KDR       | chr4 | 55980401/C//T        | synonymous    | 0 | 1 |
| DCK       | chr4 | 71889425/T//C        | nonsynonymous | 0 | 1 |
| C4orf26   | chr4 | 76489380/G//A        | nonsynonymous | 0 | 1 |
| TACR3     | chr4 | 104510910/T//A       | nonsynonymous | 0 | 1 |
| FABP2     | chr4 | 120240802/C//CATAATA | synonymous    | 0 | 1 |
| PCDH18    | chr4 | 138449888/G//A       | synonymous    | 0 | 1 |
| KIAA0922  | chr4 | 154544214/G//A       | nonsynonymous | 0 | 1 |
| PLEKHG4B  | chr5 | 163461/G//A          | nonsynonymous | 0 | 1 |
| PLEKHG4B  | chr5 | 169489/G//A          | nonsynonymous | 0 | 1 |
| ADAMTS16  | chr5 | 5235166/C//T         | synonymous    | 0 | 1 |
| PDZD2     | chr5 | 32090300/G//A        | nonsynonymous | 0 | 1 |
| RXFP3     | chr5 | 33937352/C//T        | synonymous    | 0 | 1 |
| NUP155    | chr5 | 37342749/C//A        | nonsynonymous | 0 | 1 |
| DEPDC1B   | chr5 | 59982947/C//T        | nonsynonymous | 0 | 1 |
| TNPO1     | chr5 | 72201176/G//A        | nonsynonymous | 0 | 1 |
| AGGF1     | chr5 | 76330241/A//G        | nonsynonymous | 0 | 1 |
| ACOT12    | chr5 | 80641755/A//T        | nonsynonymous | 0 | 1 |
| MCC       | chr5 | 112363143/CTT//C     | nonsynonymous | 0 | 1 |
| KCNN2     | chr5 | 113698604/C//T       | synonymous    | 0 | 1 |
| SLC22A4   | chr5 | 131630667/A//T       | nonsynonymous | 0 | 1 |
| TMEM173   | chr5 | 138860370/C//T       | synonymous    | 0 | 1 |
| PCDHGC4   | chr5 | 140865385/C//T       | synonymous    | 0 | 1 |
| PCDHGC5   | chr5 | 140869930/C//T       | nonsynonymous | 0 | 1 |
| SH3RF2    | chr5 | 145428746/C//T       | synonymous    | 0 | 1 |
| ARHGEF37  | chr5 | 149001459/C//T       | nonsynonymous | 0 | 1 |
| PPARGC1B  | chr5 | 149216359/G//A       | nonsynonymous | 0 | 1 |
| CSF1R     | chr5 | 149435891/T//A       | nonsynonymous | 0 | 1 |
| CAMK2A    | chr5 | 149602213/C//A       | synonymous    | 0 | 1 |

|           |      |                |               |   |   |
|-----------|------|----------------|---------------|---|---|
| SYNPO     | chr5 | 150027890/C//T | nonsynonymous | 0 | 1 |
| GRIA1     | chr5 | 153190672/G//A | nonsynonymous | 0 | 1 |
| GEMIN5    | chr5 | 154291403/C//T | nonsynonymous | 0 | 1 |
| ADAM19    | chr5 | 156929996/A//C | synonymous    | 0 | 1 |
| TENM2     | chr5 | 167627028/C//T | nonsynonymous | 0 | 1 |
| DOCK2     | chr5 | 169483771/C//A | nonsynonymous | 0 | 1 |
| HIVEP1    | chr6 | 12122491/G//T  | nonsynonymous | 0 | 1 |
| HIST1H4E  | chr6 | 26204873/A//G  | nonsynonymous | 0 | 1 |
| BTN3A1    | chr6 | 26409796/G//A  | nonsynonymous | 0 | 1 |
| HIST1H2AL | chr6 | 27833416/A//G  | nonsynonymous | 0 | 1 |
| ZSCAN31   | chr6 | 28297163/G//A  | nonsynonymous | 0 | 1 |
| GABBR1    | chr6 | 29574685/G//T  | synonymous    | 0 | 1 |
| TRIM15    | chr6 | 30140183/C//T  | synonymous    | 0 | 1 |
| MSH5      | chr6 | 31730334/C//A  | synonymous    | 0 | 1 |
| SKIV2L    | chr6 | 31929106/C//A  | synonymous    | 0 | 1 |
| TNXB      | chr6 | 32037339/C//T  | nonsynonymous | 0 | 1 |
| PPT2      | chr6 | 32130376/G//A  | nonsynonymous | 0 | 1 |
| TMEM217   | chr6 | 37183047/C//T  | nonsynonymous | 0 | 1 |
| TRERF1    | chr6 | 42196321/G//A  | nonsynonymous | 0 | 1 |
| PTK7      | chr6 | 43109906/A//T  | synonymous    | 0 | 1 |
| ZNF318    | chr6 | 43307593/G//T  | synonymous    | 0 | 1 |
| CDC5L     | chr6 | 44358054/C//A  | nonsynonymous | 0 | 1 |
| KHDRBS2   | chr6 | 62390821/C//A  | synonymous    | 0 | 1 |
| UBE3D     | chr6 | 83748171/G//A  | nonsynonymous | 0 | 1 |
| PRSS35    | chr6 | 84233731/A//G  | nonsynonymous | 0 | 1 |
| TBX18     | chr6 | 85473784/C//T  | nonsynonymous | 0 | 1 |
| ZNF292    | chr6 | 87965690/T//C  | synonymous    | 0 | 1 |
| CFAP206   | chr6 | 88125476/A//G  | nonsynonymous | 0 | 1 |
| PNRC1     | chr6 | 89791084/G//A  | synonymous    | 0 | 1 |
| MDN1      | chr6 | 90398365/G//T  | nonsynonymous | 0 | 1 |
| PRDM13    | chr6 | 100062179/C//T | synonymous    | 0 | 1 |
| ASCC3     | chr6 | 101248174/A//G | nonsynonymous | 0 | 1 |
| LACE1     | chr6 | 108668225/T//C | nonsynonymous | 0 | 1 |
| CDC40     | chr6 | 110534291/C//T | synonymous    | 0 | 1 |
| FAM162B   | chr6 | 117086676/C//T | nonsynonymous | 0 | 1 |
| MCM9      | chr6 | 119137260/A//G | nonsynonymous | 0 | 1 |
| GRM1      | chr6 | 146350563/C//T | synonymous    | 0 | 1 |
| SYNE1     | chr6 | 152748950/G//T | nonsynonymous | 0 | 1 |
| FNDC1     | chr6 | 159667980/G//A | nonsynonymous | 0 | 1 |
| PLG       | chr6 | 161157944/G//T | nonsynonymous | 0 | 1 |
| FAM20C    | chr7 | 300057/C//T    | synonymous    | 0 | 1 |
| ADAP1     | chr7 | 943769/G//A    | synonymous    | 0 | 1 |
| TTYH3     | chr7 | 2698055/G//A   | synonymous    | 0 | 1 |
| AP5Z1     | chr7 | 4815378/A//G   | nonsynonymous | 0 | 1 |
| RADIL     | chr7 | 4854934/G//A   | nonsynonymous | 0 | 1 |
| FSCN1     | chr7 | 5645141/C//T   | synonymous    | 0 | 1 |
| MPP6      | chr7 | 24718758/C//T  | nonsynonymous | 0 | 1 |
| EVX1      | chr7 | 27284929/C//T  | synonymous    | 0 | 1 |
| EVX1      | chr7 | 27285725/G//A  | nonsynonymous | 0 | 1 |
| NOD1      | chr7 | 30492448/A//C  | synonymous    | 0 | 1 |
| CRHR2     | chr7 | 30693147/G//A  | nonsynonymous | 0 | 1 |
| ELMO1     | chr7 | 36917634/G//A  | synonymous    | 0 | 1 |
| AMPH      | chr7 | 38671029/C//A  | synonymous    | 0 | 1 |
| ZMIZ2     | chr7 | 44800102/G//A  | nonsynonymous | 0 | 1 |
| SUN3      | chr7 | 48046787/G//T  | nonsynonymous | 0 | 1 |
| PHKG1     | chr7 | 56149727/G//A  | synonymous    | 0 | 1 |
| TRIM50    | chr7 | 72730677/G//T  | nonsynonymous | 0 | 1 |
| POR       | chr7 | 75615146/C//T  | nonsynonymous | 0 | 1 |
| MAGI2     | chr7 | 77797242/G//A  | synonymous    | 0 | 1 |
| ABCB4     | chr7 | 87042961/A//G  | nonsynonymous | 0 | 1 |
| SLC25A40  | chr7 | 87488015/T//C  | nonsynonymous | 0 | 1 |
|           | chr7 | 94833007/G//T  | synonymous    | 0 | 1 |
| ZNF394    | chr7 | 99091416/G//A  | synonymous    | 0 | 1 |
| ACTL6B    | chr7 | 100244443/C//T | synonymous    | 0 | 1 |
| SH2B2     | chr7 | 101944121/C//T | nonsynonymous | 0 | 1 |
| ALKBH4    | chr7 | 102098235/T//G | nonsynonymous | 0 | 1 |
| RELN      | chr7 | 103276917/T//G | nonsynonymous | 0 | 1 |
| DOCK4     | chr7 | 111629193/C//T | nonsynonymous | 0 | 1 |
| CFTR      | chr7 | 117304805/G//T | nonsynonymous | 0 | 1 |
| SPAM1     | chr7 | 123593838/C//A | nonsynonymous | 0 | 1 |



|             |       |                         |               |   |   |
|-------------|-------|-------------------------|---------------|---|---|
| FSCN3       | chr7  | 127236036/C//T          | nonsynonymous | 0 | 1 |
| SND1        | chr7  | 127732214/G//T          | synonymous    | 0 | 1 |
| ATP6V0A4    | chr7  | 138434041/C//T          | nonsynonymous | 0 | 1 |
| PARP12      | chr7  | 139727072/G//A          | synonymous    | 0 | 1 |
| RAB19       | chr7  | 140125841/G//A          | nonsynonymous | 0 | 1 |
| ZNF786      | chr7  | 148769135/G//A          | synonymous    | 0 | 1 |
| ZNF783      | chr7  | 148979241/G//A          | nonsynonymous | 0 | 1 |
| ABCB8       | chr7  | 150732754/C//T          | synonymous    | 0 | 1 |
| ASIC3       | chr7  | 150748266/G//C          | nonsynonymous | 0 | 1 |
| AGAP3       | chr7  | 150814491/G//A          | nonsynonymous | 0 | 1 |
| AGAP3       | chr7  | 150820980/G//A          | synonymous    | 0 | 1 |
| ERICH1      | chr8  | 665927/C//T             | nonsynonymous | 0 | 1 |
| CLN8        | chr8  | 1719331/C//T            | synonymous    | 0 | 1 |
| KBTBD11     | chr8  | 1950591/C//T            | synonymous    | 0 | 1 |
| CSMD1       | chr8  | 2944682/C//T            | nonsynonymous | 0 | 1 |
| RP1L1       | chr8  | 10470609/G//A           | synonymous    | 0 | 1 |
| TNFRSF10D   | chr8  | 22995716/C//T           | nonsynonymous | 0 | 1 |
| NEFM        | chr8  | 24772369/G//A           | nonsynonymous | 0 | 1 |
| CDCA2       | chr8  | 25346186/C//T           | nonsynonymous | 0 | 1 |
| KIF13B      | chr8  | 28929225/G//A           | synonymous    | 0 | 1 |
| LEPROTL1    | chr8  | 29963280/G//A           | nonsynonymous | 0 | 1 |
| HTRA4       | chr8  | 38831993/G//A           | nonsynonymous | 0 | 1 |
| NKAIN3      | chr8  | 63492148/G//A           | synonymous    | 0 | 1 |
| NCOA2       | chr8  | 71036301/A//G           | nonsynonymous | 0 | 1 |
| KIAA1429    | chr8  | 95556105/T//C           | nonsynonymous | 0 | 1 |
| ODF1        | chr8  | 103572755/C//T          | synonymous    | 0 | 1 |
| CTHRC1      | chr8  | 104383929/CCTCCTGCTG//C | nonsynonymous | 0 | 1 |
|             | chr8  | 105010412/G//T          | synonymous    | 0 | 1 |
| FAM91A1     | chr8  | 124787446/G//T          | nonsynonymous | 0 | 1 |
| ZNF572      | chr8  | 125989904/A//G          | nonsynonymous | 0 | 1 |
| NSMCE2      | chr8  | 126369992/C//T          | synonymous    | 0 | 1 |
| PHF20L1     | chr8  | 133848922/C//T          | nonsynonymous | 0 | 1 |
| SCRIB       | chr8  | 144875164/A//G          | synonymous    | 0 | 1 |
| SCRIB       | chr8  | 144887474/C//T          | synonymous    | 0 | 1 |
| PUF60       | chr8  | 144906524/C//T          | nonsynonymous | 0 | 1 |
| PARP10      | chr8  | 145051796/G//A          | synonymous    | 0 | 1 |
| LRRC24      | chr8  | 145748646/T//C          | nonsynonymous | 0 | 1 |
| ZNF517      | chr8  | 146033433/C//T          | nonsynonymous | 0 | 1 |
| COMMD5      | chr8  | 146076122/C//T          | nonsynonymous | 0 | 1 |
| DOCK8       | chr9  | 439289/C//T             | synonymous    | 0 | 1 |
| VLDLR       | chr9  | 2643294/G//A            | nonsynonymous | 0 | 1 |
| KIAA2026    | chr9  | 5968121/G//A            | nonsynonymous | 0 | 1 |
| ELAVL2      | chr9  | 23692366/A//G           | synonymous    | 0 | 1 |
| SPATA31A6   | chr9  | 43627415/G//A           | synonymous    | 0 | 1 |
| TRPM6       | chr9  | 77365604/C//A           | nonsynonymous | 0 | 1 |
| TLE1        | chr9  | 84205934/G//A           | synonymous    | 0 | 1 |
| DAPK1       | chr9  | 90321943/G//A           | synonymous    | 0 | 1 |
| DAPK1       | chr9  | 90322041/A//G           | nonsynonymous | 0 | 1 |
| IPPK        | chr9  | 95400291/C//T           | nonsynonymous | 0 | 1 |
| ZNF169      | chr9  | 97062405/G//A           | nonsynonymous | 0 | 1 |
| XPA         | chr9  | 100449380/G//C          | nonsynonymous | 0 | 1 |
| TBC1D2      | chr9  | 100961717/G//A          | synonymous    | 0 | 1 |
| ACTL7A      | chr9  | 111625335/G//A          | nonsynonymous | 0 | 1 |
| PALM2-AKAP2 | chr9  | 112899423/T//C          | synonymous    | 0 | 1 |
| PAPPA       | chr9  | 119033623/G//A          | nonsynonymous | 0 | 1 |
| OLFML2A     | chr9  | 127572206/C//T          | nonsynonymous | 0 | 1 |
| SPTAN1      | chr9  | 131394454/G//A          | nonsynonymous | 0 | 1 |
| GTF3C4      | chr9  | 135553865/G//A          | nonsynonymous | 0 | 1 |
| NOTCH1      | chr9  | 139417422/C//T          | nonsynonymous | 0 | 1 |
| NOTCH1      | chr9  | 139417596/C//T          | nonsynonymous | 0 | 1 |
| EXD3        | chr9  | 140243564/G//A          | nonsynonymous | 0 | 1 |
| PNPLA7      | chr9  | 140391642/G//A          | synonymous    | 0 | 1 |
| CACNA1B     | chr9  | 140941438/G//A          | nonsynonymous | 0 | 1 |
| PRKCQ       | chr10 | 6483996/G//A            | synonymous    | 0 | 1 |
| FAM171A1    | chr10 | 15256185/C//T           | nonsynonymous | 0 | 1 |
| FAM171A1    | chr10 | 15325874/T//C           | synonymous    | 0 | 1 |
| VIM         | chr10 | 17277333/G//A           | nonsynonymous | 0 | 1 |
| ZEB1        | chr10 | 31810281/G//T           | nonsynonymous | 0 | 1 |
|             | chr10 | 49632560/A//G           | synonymous    | 0 | 1 |
|             | chr10 | 55566748/A//G           | synonymous    | 0 | 1 |

|             |       |                  |               |   |   |
|-------------|-------|------------------|---------------|---|---|
| SIRT1       | chr10 | 69648669/A//T    | nonsynonymous | 0 | 1 |
| RUFY2       | chr10 | 70166932/G//T    | synonymous    | 0 | 1 |
| SUPV3L1     | chr10 | 70968481/A//C    | nonsynonymous | 0 | 1 |
| TYSND1      | chr10 | 71905392/G//C    | synonymous    | 0 | 1 |
| RGR         | chr10 | 86008724/G//T    | nonsynonymous | 0 | 1 |
| RGR         | chr10 | 86018506/G//A    | synonymous    | 0 | 1 |
| OPN4        | chr10 | 88419077/C//T    | synonymous    | 0 | 1 |
| IFIT1       | chr10 | 91162860/G//T    | nonsynonymous | 0 | 1 |
| ALDH18A1    | chr10 | 97380874/C//T    | nonsynonymous | 0 | 1 |
| FGF8        | chr10 | 103534502/G//A   | synonymous    | 0 | 1 |
| GBF1        | chr10 | 104128144/GCT//G | nonsynonymous | 0 | 1 |
| CALHM3      | chr10 | 105238777/G//A   | nonsynonymous | 0 | 1 |
| SORCS3      | chr10 | 106401130/G//A   | synonymous    | 0 | 1 |
| NRAP        | chr10 | 115423113/G//A   | synonymous    | 0 | 1 |
| TRUB1       | chr10 | 116698102/A//C   | synonymous    | 0 | 1 |
| TRUB1       | chr10 | 116698105/G//T   | nonsynonymous | 0 | 1 |
| SHTN1       | chr10 | 118764561/C//T   | synonymous    | 0 | 1 |
| PDZD8       | chr10 | 119134384/C//T   | nonsynonymous | 0 | 1 |
| EIF3A       | chr10 | 120809460/G//A   | synonymous    | 0 | 1 |
| BUB3        | chr10 | 124920065/C//T   | nonsynonymous | 0 | 1 |
| BCCIP       | chr10 | 127524676/G//A   | nonsynonymous | 0 | 1 |
| DOCK1       | chr10 | 129237356/A//G   | nonsynonymous | 0 | 1 |
| MKI67       | chr10 | 129908758/G//A   | nonsynonymous | 0 | 1 |
| DPYSL4      | chr10 | 134008415/C//T   | nonsynonymous | 0 | 1 |
| DPYSL4      | chr10 | 134010549/C//T   | nonsynonymous | 0 | 1 |
| CYP2E1      | chr10 | 135345128/G//A   | nonsynonymous | 0 | 1 |
| EPS8L2      | chr11 | 720751/G//T      | synonymous    | 0 | 1 |
| LSP1        | chr11 | 1901345/G//A     | nonsynonymous | 0 | 1 |
| CHRNA10     | chr11 | 3688759/C//T     | nonsynonymous | 0 | 1 |
| APBB1       | chr11 | 6432517/C//T     | nonsynonymous | 0 | 1 |
| SCUBE2      | chr11 | 9087461/C//T     | nonsynonymous | 0 | 1 |
| MYOD1       | chr11 | 17741650/C//T    | synonymous    | 0 | 1 |
| LMO2        | chr11 | 33880858/C//T    | synonymous    | 0 | 1 |
| API5        | chr11 | 43342458/C//T    | nonsynonymous | 0 | 1 |
| ACCS        | chr11 | 44105394/G//A    | synonymous    | 0 | 1 |
| KBTD4       | chr11 | 47600430/A//T    | synonymous    | 0 | 1 |
| LRRCS5      | chr11 | 56955012/G//A    | synonymous    | 0 | 1 |
| PATL1       | chr11 | 59426365/G//A    | nonsynonymous | 0 | 1 |
| TMEM109     | chr11 | 60689554/C//T    | nonsynonymous | 0 | 1 |
| CPSF7       | chr11 | 61187409/G//A    | nonsynonymous | 0 | 1 |
| LRRN4CL     | chr11 | 62455697/G//A    | nonsynonymous | 0 | 1 |
| STIP1       | chr11 | 63971000/G//A    | nonsynonymous | 0 | 1 |
| KCNK4-TEX40 | chr11 | 64065728/G//A    | synonymous    | 0 | 1 |
| CDC42BPG    | chr11 | 64606350/C//T    | nonsynonymous | 0 | 1 |
| NAALADL1    | chr11 | 64824854/G//A    | nonsynonymous | 0 | 1 |
| PITPNM1     | chr11 | 67261435/C//T    | nonsynonymous | 0 | 1 |
| NUMA1       | chr11 | 71725554/G//A    | nonsynonymous | 0 | 1 |
| RSF1        | chr11 | 77383222/G//A    | nonsynonymous | 0 | 1 |
| CCDC89      | chr11 | 85396236/C//T    | nonsynonymous | 0 | 1 |
| CCDC83      | chr11 | 85630527/T//A    | nonsynonymous | 0 | 1 |
| TYR         | chr11 | 88911551/A//G    | nonsynonymous | 0 | 1 |
| CEP126      | chr11 | 101832467/T//C   | synonymous    | 0 | 1 |
| RDX         | chr11 | 110128835/A//T   | nonsynonymous | 0 | 1 |
| NCAM1       | chr11 | 113078059/C//T   | synonymous    | 0 | 1 |
| ZW10        | chr11 | 113639667/C//T   | nonsynonymous | 0 | 1 |
| ZBTB16      | chr11 | 114121208/C//T   | synonymous    | 0 | 1 |
| DSCAML1     | chr11 | 117302334/A//G   | nonsynonymous | 0 | 1 |
| C2CD2L      | chr11 | 118981304/C//T   | nonsynonymous | 0 | 1 |
| GRAMD1B     | chr11 | 123493225/G//A   | synonymous    | 0 | 1 |
| SRPRA       | chr11 | 126134389/C//T   | nonsynonymous | 0 | 1 |
| FKBP4       | chr12 | 2906347/G//T     | nonsynonymous | 0 | 1 |
| CHD4        | chr12 | 6687043/G//A     | nonsynonymous | 0 | 1 |
| HEBP1       | chr12 | 13128371/T//G    | nonsynonymous | 0 | 1 |
| CAPZA3      | chr12 | 18891993/G//A    | nonsynonymous | 0 | 1 |
| PDE3A       | chr12 | 20803540/T//C    | synonymous    | 0 | 1 |
| SLCO1B1     | chr12 | 21353476/T//A    | nonsynonymous | 0 | 1 |
| RASSF8      | chr12 | 26217518/A//G    | nonsynonymous | 0 | 1 |
| ITPR2       | chr12 | 26775278/G//A    | synonymous    | 0 | 1 |
| ADAMTS20    | chr12 | 43748048/A//C    | synonymous    | 0 | 1 |
| KMT2D       | chr12 | 49443503/G//A    | nonsynonymous | 0 | 1 |

|          |       |                |               |   |   |
|----------|-------|----------------|---------------|---|---|
| NCKAP5L  | chr12 | 50190161/G//A  | synonymous    | 0 | 1 |
| GPD1     | chr12 | 50497867/G//A  | nonsynonymous | 0 | 1 |
| CERS5    | chr12 | 50536906/G//A  | nonsynonymous | 0 | 1 |
| TARBP2   | chr12 | 53899446/G//A  | nonsynonymous | 0 | 1 |
| SUOX     | chr12 | 56397780/C//T  | synonymous    | 0 | 1 |
| CAND1    | chr12 | 67703684/A//T  | nonsynonymous | 0 | 1 |
| CAPS2    | chr12 | 75678746/G//A  | nonsynonymous | 0 | 1 |
| TMTC2    | chr12 | 83250836/C//T  | nonsynonymous | 0 | 1 |
| PARPBP   | chr12 | 102517728/G//A | nonsynonymous | 0 | 1 |
| WSCD2    | chr12 | 108641899/C//T | nonsynonymous | 0 | 1 |
| UBE3B    | chr12 | 109921677/A//G | nonsynonymous | 0 | 1 |
| SH2B3    | chr12 | 111856065/G//A | nonsynonymous | 0 | 1 |
| ATXN2    | chr12 | 111908477/G//A | nonsynonymous | 0 | 1 |
| TPCN1    | chr12 | 113726017/G//A | nonsynonymous | 0 | 1 |
| GCN1     | chr12 | 120572451/A//G | nonsynonymous | 0 | 1 |
| C12orf43 | chr12 | 121448948/A//G | synonymous    | 0 | 1 |
| P2RX7    | chr12 | 121622316/G//A | nonsynonymous | 0 | 1 |
| MORN3    | chr12 | 122107322/C//A | nonsynonymous | 0 | 1 |
| WDR66    | chr12 | 122441592/C//T | synonymous    | 0 | 1 |
| CLIP1    | chr12 | 122757390/T//C | synonymous    | 0 | 1 |
| SBNO1    | chr12 | 123815060/C//T | synonymous    | 0 | 1 |
| DNAH10   | chr12 | 124270304/C//T | synonymous    | 0 | 1 |
| FBRSL1   | chr12 | 133159750/C//T | nonsynonymous | 0 | 1 |
| GOLGA3   | chr12 | 133360756/C//A | nonsynonymous | 0 | 1 |
| ATP12A   | chr13 | 25265211/G//A  | synonymous    | 0 | 1 |
| WASF3    | chr13 | 27255363/G//A  | nonsynonymous | 0 | 1 |
| GTF3A    | chr13 | 28009569/G//T  | nonsynonymous | 0 | 1 |
| FRY      | chr13 | 32752579/G//A  | synonymous    | 0 | 1 |
| POSTN    | chr13 | 38144729/G//A  | nonsynonymous | 0 | 1 |
| DGKH     | chr13 | 42803314/C//T  | nonsynonymous | 0 | 1 |
| ZC3H13   | chr13 | 46542110/G//A  | nonsynonymous | 0 | 1 |
| VPS36    | chr13 | 52992189/C//T  | synonymous    | 0 | 1 |
| DNAJC3   | chr13 | 96443193/G//A  | nonsynonymous | 0 | 1 |
| MYO16    | chr13 | 109793153/G//A | synonymous    | 0 | 1 |
| TUBGCP3  | chr13 | 113174261/G//A | nonsynonymous | 0 | 1 |
| TUBGCP3  | chr13 | 113212536/C//T | synonymous    | 0 | 1 |
| ADPRHL1  | chr13 | 114077287/G//A | synonymous    | 0 | 1 |
| SUPT16H  | chr14 | 21831393/C//A  | nonsynonymous | 0 | 1 |
| MMP14    | chr14 | 23312593/C//T  | synonymous    | 0 | 1 |
| LRP10    | chr14 | 23345585/A//G  | synonymous    | 0 | 1 |
| SLC22A17 | chr14 | 23817755/G//A  | nonsynonymous | 0 | 1 |
| HEATR5A  | chr14 | 31782236/G//A  | nonsynonymous | 0 | 1 |
| MBIP     | chr14 | 36784005/G//A  | synonymous    | 0 | 1 |
| FOXA1    | chr14 | 38061208/G//A  | nonsynonymous | 0 | 1 |
| CLEC14A  | chr14 | 38725058/C//G  | nonsynonymous | 0 | 1 |
| FANCM    | chr14 | 45654560/T//G  | synonymous    | 0 | 1 |
|          | chr14 | 50789458/C//T  | synonymous    | 0 | 1 |
| CGRRF1   | chr14 | 55005089/G//A  | synonymous    | 0 | 1 |
| TMEM260  | chr14 | 57052475/G//A  | synonymous    | 0 | 1 |
| ARID4A   | chr14 | 58796296/C//T  | nonsynonymous | 0 | 1 |
| RTN1     | chr14 | 60069777/A//G  | synonymous    | 0 | 1 |
| PLEKHD1  | chr14 | 69995141/C//T  | synonymous    | 0 | 1 |
| PCNX1    | chr14 | 71444742/G//A  | nonsynonymous | 0 | 1 |
| LTBP2    | chr14 | 74969592/C//T  | nonsynonymous | 0 | 1 |
| CPSF2    | chr14 | 92622936/C//A  | nonsynonymous | 0 | 1 |
| GOLGA5   | chr14 | 93299517/A//C  | synonymous    | 0 | 1 |
| UNC79    | chr14 | 94069669/G//A  | nonsynonymous | 0 | 1 |
| SERPINA5 | chr14 | 95056484/T//C  | synonymous    | 0 | 1 |
| DICER1   | chr14 | 95574784/A//G  | synonymous    | 0 | 1 |
| CEP170B  | chr14 | 105342672/G//T | nonsynonymous | 0 | 1 |
| AHNAK2   | chr14 | 105416320/A//G | nonsynonymous | 0 | 1 |
| GPR132   | chr14 | 105518274/G//A | nonsynonymous | 0 | 1 |
| GABRA5   | chr15 | 27188433/G//A  | nonsynonymous | 0 | 1 |
| NSMCE3   | chr15 | 29561737/T//C  | nonsynonymous | 0 | 1 |
| FAM98B   | chr15 | 38776806/A//T  | synonymous    | 0 | 1 |
| MGA      | chr15 | 41988912/T//C  | synonymous    | 0 | 1 |
| ZNF106   | chr15 | 42742512/C//T  | nonsynonymous | 0 | 1 |
| STARD9   | chr15 | 43011022/C//T  | nonsynonymous | 0 | 1 |
| FBN1     | chr15 | 48729576/G//A  | nonsynonymous | 0 | 1 |
| FBN1     | chr15 | 48777571/C//T  | nonsynonymous | 0 | 1 |

|          |       |               |               |   |   |
|----------|-------|---------------|---------------|---|---|
| LEO1     | chr15 | 52230255/A/G  | synonymous    | 0 | 1 |
| RFX7     | chr15 | 56388616/G//A | nonsynonymous | 0 | 1 |
| LDHAL6B  | chr15 | 59499582/G//A | nonsynonymous | 0 | 1 |
| TLN2     | chr15 | 63009863/A//G | nonsynonymous | 0 | 1 |
| HERC1    | chr15 | 63970259/C//T | synonymous    | 0 | 1 |
| HERC1    | chr15 | 64019934/G//A | synonymous    | 0 | 1 |
| KBTBD13  | chr15 | 65369649/G//A | nonsynonymous | 0 | 1 |
| UBAP1L   | chr15 | 65394744/C//T | synonymous    | 0 | 1 |
| MEGF11   | chr15 | 66191105/G//A | nonsynonymous | 0 | 1 |
| EDC3     | chr15 | 74925040/G//A | synonymous    | 0 | 1 |
| SIN3A    | chr15 | 75694229/C//T | nonsynonymous | 0 | 1 |
| ARNT2    | chr15 | 80845031/A//G | synonymous    | 0 | 1 |
| BTBD1    | chr15 | 83735814/T//C | synonymous    | 0 | 1 |
| WFIKK1   | chr16 | 683074/CAG//C | nonsynonymous | 0 | 1 |
| PRR25    | chr16 | 863752/C//T   | nonsynonymous | 0 | 1 |
| TPSB2    | chr16 | 1279460/G//T  | synonymous    | 0 | 1 |
| CRAMP1   | chr16 | 1682272/C//T  | synonymous    | 0 | 1 |
| MAPK8IP3 | chr16 | 1818983/C//T  | synonymous    | 0 | 1 |
| TRAF7    | chr16 | 2225837/C//A  | synonymous    | 0 | 1 |
| E4F1     | chr16 | 2284731/G//A  | nonsynonymous | 0 | 1 |
| AMDHD2   | chr16 | 2578385/A//G  | synonymous    | 0 | 1 |
| ZSCAN10  | chr16 | 3139035/G//A  | synonymous    | 0 | 1 |
| CIITA    | chr16 | 10989169/G//T | nonsynonymous | 0 | 1 |
| XYLT1    | chr16 | 17294417/G//A | synonymous    | 0 | 1 |
| SYT17    | chr16 | 19184096/C//T | synonymous    | 0 | 1 |
| GP2      | chr16 | 20325987/C//T | nonsynonymous | 0 | 1 |
| TNRC6A   | chr16 | 24829938/C//T | nonsynonymous | 0 | 1 |
| CCDC189  | chr16 | 30771047/T//C | nonsynonymous | 0 | 1 |
| ABCC11   | chr16 | 48234378/C//A | nonsynonymous | 0 | 1 |
| CDH16    | chr16 | 66946249/C//T | nonsynonymous | 0 | 1 |
| RRAD     | chr16 | 66959009/C//T | nonsynonymous | 0 | 1 |
| ESRP2    | chr16 | 68267742/C//T | nonsynonymous | 0 | 1 |
| PHLPP2   | chr16 | 71715672/C//T | nonsynonymous | 0 | 1 |
| TMEM231  | chr16 | 75575345/C//T | nonsynonymous | 0 | 1 |
| GSE1     | chr16 | 85690916/A//C | nonsynonymous | 0 | 1 |
| SLC7A5   | chr16 | 87873326/C//T | synonymous    | 0 | 1 |
| ANKRD11  | chr16 | 89346901/C//T | nonsynonymous | 0 | 1 |
| RPH3AL   | chr17 | 97041/C//T    | synonymous    | 0 | 1 |
| CLUH     | chr17 | 2595924/C//T  | nonsynonymous | 0 | 1 |
| P2RX1    | chr17 | 3802999/C//T  | synonymous    | 0 | 1 |
| NLGN2    | chr17 | 7320485/C//T  | synonymous    | 0 | 1 |
| NLGN2    | chr17 | 7320545/G//A  | synonymous    | 0 | 1 |
| DNAH2    | chr17 | 7722533/C//T  | nonsynonymous | 0 | 1 |
|          | chr17 | 8025353/C//T  | synonymous    | 0 | 1 |
| MYH10    | chr17 | 8439232/T//C  | synonymous    | 0 | 1 |
| PIRT     | chr17 | 10728805/C//T | nonsynonymous | 0 | 1 |
| FLII     | chr17 | 18149949/G//A | synonymous    | 0 | 1 |
| TAOK1    | chr17 | 27870038/T//C | nonsynonymous | 0 | 1 |
| SLC6A4   | chr17 | 28537597/C//T | nonsynonymous | 0 | 1 |
| TEFM     | chr17 | 29226143/C//T | synonymous    | 0 | 1 |
| SYNRG    | chr17 | 35913996/T//G | nonsynonymous | 0 | 1 |
| SYNRG    | chr17 | 35969448/G//A | synonymous    | 0 | 1 |
| CDK12    | chr17 | 37627158/G//C | nonsynonymous | 0 | 1 |
| WIPF2    | chr17 | 38430198/C//T | nonsynonymous | 0 | 1 |
| KRT15    | chr17 | 39674848/C//T | nonsynonymous | 0 | 1 |
| WNK4     | chr17 | 40937386/G//A | synonymous    | 0 | 1 |
| BRCA1    | chr17 | 41251786/C//A | synonymous    | 0 | 1 |
| ARHGAP27 | chr17 | 43481033/G//A | synonymous    | 0 | 1 |
| FAM117A  | chr17 | 47793619/G//T | synonymous    | 0 | 1 |
| CACNA1G  | chr17 | 48667850/G//A | nonsynonymous | 0 | 1 |
| PCTP     | chr17 | 53852214/C//T | synonymous    | 0 | 1 |
| EPX      | chr17 | 56271153/G//A | nonsynonymous | 0 | 1 |
| TUBD1    | chr17 | 57955556/T//C | nonsynonymous | 0 | 1 |
| TBX4     | chr17 | 59533889/C//T | nonsynonymous | 0 | 1 |
| STRADA   | chr17 | 61790815/C//T | nonsynonymous | 0 | 1 |
| ERN1     | chr17 | 62135251/C//T | nonsynonymous | 0 | 1 |
| AXIN2    | chr17 | 63533488/T//C | nonsynonymous | 0 | 1 |
| EXOC7    | chr17 | 74090654/T//A | nonsynonymous | 0 | 1 |
| RNF157   | chr17 | 74141315/C//T | synonymous    | 0 | 1 |
| CCDC40   | chr17 | 78058708/G//A | nonsynonymous | 0 | 1 |

|          |       |               |               |   |   |
|----------|-------|---------------|---------------|---|---|
| SLC16A3  | chr17 | 80195340/G//A | nonsynonymous | 0 | 1 |
| ANKRD30B | chr18 | 14852512/A//T | synonymous    | 0 | 1 |
| DSG1     | chr18 | 28906935/T//C | synonymous    | 0 | 1 |
| CNDP2    | chr18 | 72168698/A//G | synonymous    | 0 | 1 |
| ATP9B    | chr18 | 77134003/C//T | nonsynonymous | 0 | 1 |
| NFATC1   | chr18 | 77246347/G//A | nonsynonymous | 0 | 1 |
| PARD6G   | chr18 | 77918073/C//T | nonsynonymous | 0 | 1 |
| BSG      | chr19 | 580444/C//T   | nonsynonymous | 0 | 1 |
| MED16    | chr19 | 871987/G//A   | synonymous    | 0 | 1 |
| ABCA7    | chr19 | 1047222/G//C  | nonsynonymous | 0 | 1 |
| MEX3D    | chr19 | 1555805/G//A  | synonymous    | 0 | 1 |
| DIRAS1   | chr19 | 2717669/G//A  | nonsynonymous | 0 | 1 |
| CHAF1A   | chr19 | 4422572/C//T  | nonsynonymous | 0 | 1 |
| NRTN     | chr19 | 5828223/G//A  | synonymous    | 0 | 1 |
| PEX11G   | chr19 | 7543211/C//T  | synonymous    | 0 | 1 |
| CD209    | chr19 | 7812374/T//C  | synonymous    | 0 | 1 |
| OR7E24   | chr19 | 9361754/T//C  | nonsynonymous | 0 | 1 |
| PPAN     | chr19 | 10221240/C//A | synonymous    | 0 | 1 |
| S1PR2    | chr19 | 10335094/C//T | nonsynonymous | 0 | 1 |
| ICAM1    | chr19 | 10394255/G//A | nonsynonymous | 0 | 1 |
| TYK2     | chr19 | 10465191/G//A | synonymous    | 0 | 1 |
| CDC37    | chr19 | 10506606/T//C | nonsynonymous | 0 | 1 |
| KANK2    | chr19 | 11303802/C//T | nonsynonymous | 0 | 1 |
| RGL3     | chr19 | 11512916/A//G | nonsynonymous | 0 | 1 |
| DHPS     | chr19 | 12788210/T//A | nonsynonymous | 0 | 1 |
| DHPS     | chr19 | 12791072/C//T | nonsynonymous | 0 | 1 |
| HOOK2    | chr19 | 12878668/C//T | nonsynonymous | 0 | 1 |
| JUNB     | chr19 | 12902436/G//A | synonymous    | 0 | 1 |
| FARSA    | chr19 | 13035326/G//A | nonsynonymous | 0 | 1 |
| NACC1    | chr19 | 13246278/A//G | nonsynonymous | 0 | 1 |
| RFX1     | chr19 | 14074087/G//A | synonymous    | 0 | 1 |
| PKN1     | chr19 | 14580619/G//A | nonsynonymous | 0 | 1 |
| ZNF333   | chr19 | 14830122/G//A | synonymous    | 0 | 1 |
| KCNN1    | chr19 | 18092643/G//A | synonymous    | 0 | 1 |
| GMIP     | chr19 | 19744695/G//A | nonsynonymous | 0 | 1 |
| ZNF91    | chr19 | 23543531/T//A | synonymous    | 0 | 1 |
| ARHGAP33 | chr19 | 36271872/C//T | nonsynonymous | 0 | 1 |
| ACTN4    | chr19 | 39212332/C//T | synonymous    | 0 | 1 |
| SPTBN4   | chr19 | 40996001/G//A | nonsynonymous | 0 | 1 |
| MEGF8    | chr19 | 42848196/G//A | nonsynonymous | 0 | 1 |
| APOE     | chr19 | 45412298/G//A | nonsynonymous | 0 | 1 |
| PPP1R37  | chr19 | 45646858/G//A | synonymous    | 0 | 1 |
| PPM1N    | chr19 | 46002284/C//T | nonsynonymous | 0 | 1 |
| QPCTL    | chr19 | 46206267/G//A | nonsynonymous | 0 | 1 |
| PRKD2    | chr19 | 47207834/C//T | nonsynonymous | 0 | 1 |
| ARHGAP35 | chr19 | 47423198/G//T | nonsynonymous | 0 | 1 |
| NTN5     | chr19 | 49165166/C//T | nonsynonymous | 0 | 1 |
| FLT3LG   | chr19 | 49977874/G//T | synonymous    | 0 | 1 |
| CPT1C    | chr19 | 50204577/C//A | nonsynonymous | 0 | 1 |
| ZNF473   | chr19 | 50548081/C//T | synonymous    | 0 | 1 |
| POLD1    | chr19 | 50912789/C//T | synonymous    | 0 | 1 |
| SHANK1   | chr19 | 51171129/G//A | nonsynonymous | 0 | 1 |
| EPS8L1   | chr19 | 55598206/G//A | synonymous    | 0 | 1 |
| PPP1R12C | chr19 | 55602640/G//A | synonymous    | 0 | 1 |
| ZNF134   | chr19 | 58132398/T//C | nonsynonymous | 0 | 1 |
| ZNF837   | chr19 | 58879247/C//T | nonsynonymous | 0 | 1 |
| MZF1     | chr19 | 59080905/G//A | nonsynonymous | 0 | 1 |
| RBCK1    | chr20 | 398229/G//A   | nonsynonymous | 0 | 1 |
| IDH3B    | chr20 | 2641196/C//T  | nonsynonymous | 0 | 1 |
| FASTKD5  | chr20 | 3128656/C//T  | nonsynonymous | 0 | 1 |
| LZTS3    | chr20 | 3145465/C//T  | nonsynonymous | 0 | 1 |
| ESF1     | chr20 | 13763615/G//A | nonsynonymous | 0 | 1 |
| NINL     | chr20 | 25484647/C//T | nonsynonymous | 0 | 1 |
| SNTA1    | chr20 | 32031304/G//T | synonymous    | 0 | 1 |
| MMP24    | chr20 | 33839819/C//A | synonymous    | 0 | 1 |
| DSN1     | chr20 | 35381173/G//A | synonymous    | 0 | 1 |
| TGM2     | chr20 | 36766591/G//T | synonymous    | 0 | 1 |
| PPP1R16B | chr20 | 37546998/G//A | nonsynonymous | 0 | 1 |
| JPH2     | chr20 | 42744506/C//T | synonymous    | 0 | 1 |
| ZNF334   | chr20 | 45131009/A//G | synonymous    | 0 | 1 |

|              |       |                |               |   |   |
|--------------|-------|----------------|---------------|---|---|
| PREX1        | chr20 | 47364404/C//T  | nonsynonymous | 0 | 1 |
| SNAI1        | chr20 | 48604570/G//A  | nonsynonymous | 0 | 1 |
| TFAP2C       | chr20 | 55206341/G//A  | synonymous    | 0 | 1 |
| SPO11        | chr20 | 55904875/C//T  | synonymous    | 0 | 1 |
| GNAS         | chr20 | 57428326/C//T  | synonymous    | 0 | 1 |
| LAMA5        | chr20 | 60891033/G//A  | nonsynonymous | 0 | 1 |
| DIDO1        | chr20 | 61542401/C//T  | synonymous    | 0 | 1 |
| COL20A1      | chr20 | 61941114/G//A  | synonymous    | 0 | 1 |
| SOX18        | chr20 | 62679779/G//A  | nonsynonymous | 0 | 1 |
| LTN1         | chr21 | 30329802/A//G  | synonymous    | 0 | 1 |
| GRIK1        | chr21 | 30971233/G//A  | nonsynonymous | 0 | 1 |
| SON          | chr21 | 34918513/G//A  | synonymous    | 0 | 1 |
|              | chr21 | 36265220/A//G  | synonymous    | 0 | 1 |
| TFF2         | chr21 | 43771051/C//T  | nonsynonymous | 0 | 1 |
| UBASH3A      | chr21 | 43838653/C//T  | synonymous    | 0 | 1 |
| SLC37A1      | chr21 | 43963540/C//T  | synonymous    | 0 | 1 |
| CBSL         | chr21 | 44474040/C//T  | nonsynonymous | 0 | 1 |
| RRP1B        | chr21 | 45107928/C//T  | nonsynonymous | 0 | 1 |
| AIRE         | chr21 | 45713744/G//A  | nonsynonymous | 0 | 1 |
| MICAL3       | chr22 | 18368670/C//T  | nonsynonymous | 0 | 1 |
| TRMT2A       | chr22 | 20100968/G//A  | synonymous    | 0 | 1 |
| KLHL22       | chr22 | 20796627/G//T  | synonymous    | 0 | 1 |
| AIFM3        | chr22 | 21329977/G//A  | synonymous    | 0 | 1 |
| HIC2         | chr22 | 21800692/G//A  | nonsynonymous | 0 | 1 |
| CCDC116      | chr22 | 21989363/C//A  | synonymous    | 0 | 1 |
| ZNF280B      | chr22 | 22843423/C//T  | nonsynonymous | 0 | 1 |
| MYO18B       | chr22 | 26388399/G//A  | nonsynonymous | 0 | 1 |
| GAS2L1       | chr22 | 29707952/C//T  | nonsynonymous | 0 | 1 |
| LARGE1       | chr22 | 34000543/G//A  | nonsynonymous | 0 | 1 |
| SSTR3        | chr22 | 37603678/G//A  | synonymous    | 0 | 1 |
| JOSD1        | chr22 | 39095928/G//A  | nonsynonymous | 0 | 1 |
| CHADL        | chr22 | 41633559/C//T  | nonsynonymous | 0 | 1 |
| TCF20        | chr22 | 42607828/G//A  | nonsynonymous | 0 | 1 |
| PRR5-ARHGAP8 | chr22 | 45182492/G//A  | synonymous    | 0 | 1 |
| PHF21B       | chr22 | 45312312/C//T  | nonsynonymous | 0 | 1 |
| CELSR1       | chr22 | 46931191/G//T  | nonsynonymous | 0 | 1 |
| PLXNB2       | chr22 | 50728676/C//T  | nonsynonymous | 0 | 1 |
| PPP2R3B      | chrX  | 347448/G//A    | synonymous    | 0 | 1 |
| MAGEB2       | chrX  | 30236744/G//A  | nonsynonymous | 0 | 1 |
| DDX3X        | chrX  | 41204467/G//A  | nonsynonymous | 0 | 1 |
| GATA1        | chrX  | 48650883/C//T  | synonymous    | 0 | 1 |
| TRO          | chrX  | 54957244/T//C  | nonsynonymous | 0 | 1 |
| PHKA1        | chrX  | 71864297/C//A  | nonsynonymous | 0 | 1 |
| KIAA2022     | chrX  | 73961577/T//C  | nonsynonymous | 0 | 1 |
| BRWD3        | chrX  | 79984249/A//G  | nonsynonymous | 0 | 1 |
| RHOXF1       | chrX  | 119249408/A//G | nonsynonymous | 0 | 1 |
| ZNF75D       | chrX  | 134421629/T//G | nonsynonymous | 0 | 1 |
| BRS3         | chrX  | 135570611/G//T | nonsynonymous | 0 | 1 |
| MAMLD1       | chrX  | 149638916/A//C | synonymous    | 0 | 1 |
| PASD1        | chrX  | 150840104/G//A | synonymous    | 0 | 1 |
| UTY          | chrY  | 15417973/C//A  | nonsynonymous | 0 | 1 |
| KIF17        | chr1  | 21009263/C//T  | synonymous    | 0 | 1 |
| HEYL         | chr1  | 40092321/G//A  | nonsynonymous | 0 | 1 |
| NTRK1        | chr1  | 156849867/G//A | nonsynonymous | 0 | 1 |
| NCSTN        | chr1  | 160321968/G//A | nonsynonymous | 0 | 1 |
| FASTKD2      | chr2  | 207652704/T//C | synonymous    | 0 | 1 |
| ANO10        | chr3  | 43591341/C//G  | nonsynonymous | 0 | 1 |
| PCLO         | chr7  | 82390770/T//A  | nonsynonymous | 0 | 1 |
| C8orf74      | chr8  | 10557965/C//T  | nonsynonymous | 0 | 1 |
| CNTRL        | chr9  | 123870180/A//G | synonymous    | 0 | 1 |
| RTF1         | chr15 | 41709342/C//T  | nonsynonymous | 0 | 1 |
| GTF3C1       | chr16 | 27506538/C//A  | nonsynonymous | 0 | 1 |
| NOB1         | chr16 | 69776309/C//G  | nonsynonymous | 0 | 1 |
|              | chr17 | 80904962/T//C  | synonymous    | 0 | 1 |
| ME2          | chr18 | 48439194/A//G  | nonsynonymous | 0 | 1 |
|              | chr20 | 50179158/T//C  | synonymous    | 0 | 1 |
| TRMT2B       | chrX  | 100297217/C//A | nonsynonymous | 0 | 1 |
| FLNA         | chrX  | 153588741/G//A | nonsynonymous | 0 | 1 |
| LRRC47       | chr1  | 3703599/C//T   | synonymous    | 0 | 1 |
| MTOR         | chr1  | 11169361/C//G  | nonsynonymous | 0 | 1 |

|           |      |                           |               |   |   |
|-----------|------|---------------------------|---------------|---|---|
| UBR4      | chr1 | 19482877/G//A             | nonsynonymous | 0 | 1 |
| THRAP3    | chr1 | 36769555/A//T             | nonsynonymous | 0 | 1 |
| CSF3R     | chr1 | 36934832/C//T             | nonsynonymous | 0 | 1 |
| SLC5A9    | chr1 | 48695052/A//G             | nonsynonymous | 0 | 1 |
| WDR47     | chr1 | 109545026/T//A            | nonsynonymous | 0 | 1 |
| CELSR2    | chr1 | 109804222/G//A            | synonymous    | 0 | 1 |
| OR10X1    | chr1 | 158549238/A//G            | nonsynonymous | 0 | 1 |
| SELP      | chr1 | 169572304/A//T            | synonymous    | 0 | 1 |
| C1orf112  | chr1 | 169820997/C//T            | nonsynonymous | 0 | 1 |
| PAPPA2    | chr1 | 176738902/C//T            | nonsynonymous | 0 | 1 |
| NEK7      | chr1 | 198262082/G//A            | synonymous    | 0 | 1 |
| LRRN2     | chr1 | 204587549/G//A            | synonymous    | 0 | 1 |
| CNIH3     | chr1 | 224918258/T//G            | nonsynonymous | 0 | 1 |
| ARF1      | chr1 | 228285714/A//G            | nonsynonymous | 0 | 1 |
| GREM2     | chr1 | 240656228/G//A            | synonymous    | 0 | 1 |
| TMEM247   | chr2 | 46707760/G//A             | nonsynonymous | 0 | 1 |
| BMP10     | chr2 | 69093273/C//T             | synonymous    | 0 | 1 |
| MOGS      | chr2 | 74692319/G//C             | nonsynonymous | 0 | 1 |
| RGPD3     | chr2 | 107040985/T//C            | synonymous    | 0 | 1 |
| NXPH2     | chr2 | 139537756/C//T            | synonymous    | 0 | 1 |
| LRP1B     | chr2 | 141004675/T//G            | nonsynonymous | 0 | 1 |
| LRP1B     | chr2 | 141473567/A//G            | nonsynonymous | 0 | 1 |
| LRP1B     | chr2 | 141665551/G//C            | nonsynonymous | 0 | 1 |
| XIRP2     | chr2 | 168106537/A//C            | nonsynonymous | 0 | 1 |
| ZNF804A   | chr2 | 185803858/G//A            | synonymous    | 0 | 1 |
| COL3A1    | chr2 | 189875411/T//C            | nonsynonymous | 0 | 1 |
| ALS2CR12  | chr2 | 202153371/T//G            | synonymous    | 0 | 1 |
| ALS2CR11  | chr2 | 202352441/A//G            | nonsynonymous | 0 | 1 |
| CHL1      | chr3 | 425526/G//T               | nonsynonymous | 0 | 1 |
| SETMAR    | chr3 | 4355071/G//A              | nonsynonymous | 0 | 1 |
| NEK10     | chr3 | 27343282/G//C             | nonsynonymous | 0 | 1 |
| TRAIP     | chr3 | 49879364/A//C             | nonsynonymous | 0 | 1 |
| CEP97     | chr3 | 101474304/C//A            | synonymous    | 0 | 1 |
| SIDT1     | chr3 | 113335006/A//C            | nonsynonymous | 0 | 1 |
| TMEM39A   | chr3 | 119151018/A//C            | nonsynonymous | 0 | 1 |
| LINC01565 | chr3 | 128292265/A//G            | synonymous    | 0 | 1 |
| COL6A6    | chr3 | 130380702/C//T            | nonsynonymous | 0 | 1 |
| CCNL1     | chr3 | 156877237/T//A            | nonsynonymous | 0 | 1 |
| RNF212    | chr4 | 1075206/C//A              | nonsynonymous | 0 | 1 |
| PPARGC1A  | chr4 | 23797471/C//T             | nonsynonymous | 0 | 1 |
| LRRC66    | chr4 | 52861782/A//C             | nonsynonymous | 0 | 1 |
| SGCB      | chr4 | 52890046/C//T             | synonymous    | 0 | 1 |
| WDFY3     | chr4 | 85715821/G//A             | nonsynonymous | 0 | 1 |
| NDST3     | chr4 | 119161715/T//A            | nonsynonymous | 0 | 1 |
| SEC24D    | chr4 | 119745770/C//T            | synonymous    | 0 | 1 |
| GUCY1B3   | chr4 | 156723524/T//G            | synonymous    | 0 | 1 |
| DNAH5     | chr5 | 13901621/C//T             | nonsynonymous | 0 | 1 |
| CMYA5     | chr5 | 79030594/A//C             | nonsynonymous | 0 | 1 |
| SLC27A6   | chr5 | 128326109/G//T            | synonymous    | 0 | 1 |
| PCDHA3    | chr5 | 140181496/C//T            | synonymous    | 0 | 1 |
| STK10     | chr5 | 171533645/G//A            | nonsynonymous | 0 | 1 |
| OR12D2    | chr6 | 29365080/G//A             | nonsynonymous | 0 | 1 |
| LGSN      | chr6 | 63990218/G//C             | nonsynonymous | 0 | 1 |
| NKAIN2    | chr6 | 125112532/A//C            | nonsynonymous | 0 | 1 |
| HINT3     | chr6 | 126296015/T//C            | nonsynonymous | 0 | 1 |
| RSPH3     | chr6 | 159421015/G//A            | synonymous    | 0 | 1 |
| VWDE      | chr7 | 12376686/T//G             | nonsynonymous | 0 | 1 |
| SKAP2     | chr7 | 26904037/G//C             | synonymous    | 0 | 1 |
| MYL7      | chr7 | 44179386/C//A             | nonsynonymous | 0 | 1 |
| ABCA13    | chr7 | 48315615/A//T             | nonsynonymous | 0 | 1 |
| ABCA13    | chr7 | 48378049/T//C             | nonsynonymous | 0 | 1 |
| CYP3A5    | chr7 | 99247847/T//G             | nonsynonymous | 0 | 1 |
| MCM7      | chr7 | 99695536/C//T             | synonymous    | 0 | 1 |
| TAF6      | chr7 | 99711291/G//A             | synonymous    | 0 | 1 |
| SNAI2     | chr8 | 49832510/G//A             | synonymous    | 0 | 1 |
| SULF1     | chr8 | 70540097/C//A             | nonsynonymous | 0 | 1 |
| PRDM14    | chr8 | 70981551/G//A             | nonsynonymous | 0 | 1 |
| OTUD6B    | chr8 | 92092954/TTGAGGTAAGTTTGTA | nonsynonymous | 0 | 1 |
| ADCY8     | chr8 | 132051710/G//C            | synonymous    | 0 | 1 |
| ARC       | chr8 | 143695314/G//A            | nonsynonymous | 0 | 1 |

|          |       |                   |               |   |   |
|----------|-------|-------------------|---------------|---|---|
| EEF1D    | chr8  | 144669019/T//C    | synonymous    | 0 | 1 |
| ARHGAP39 | chr8  | 145772787/C//A    | nonsynonymous | 0 | 1 |
| ACO1     | chr9  | 32408615/A//G     | nonsynonymous | 0 | 1 |
| ZNF189   | chr9  | 104171713/C//G    | nonsynonymous | 0 | 1 |
| KLF4     | chr9  | 110249544/C//T    | synonymous    | 0 | 1 |
| OR1K1    | chr9  | 125562933/T//G    | nonsynonymous | 0 | 1 |
| ABL1     | chr9  | 133761044/G//A    | nonsynonymous | 0 | 1 |
| WDFY4    | chr10 | 49984922/G//C     | nonsynonymous | 0 | 1 |
| WDFY4    | chr10 | 49985007/G//C     | nonsynonymous | 0 | 1 |
| C10orf71 | chr10 | 50531657/C//A     | nonsynonymous | 0 | 1 |
| ARL3     | chr10 | 104436669/G//A    | synonymous    | 0 | 1 |
| FAM175B  | chr10 | 126490438/T//C    | nonsynonymous | 0 | 1 |
| OR51V1   | chr11 | 5221722/T//A      | nonsynonymous | 0 | 1 |
| TUB      | chr11 | 8120325/A//C      | nonsynonymous | 0 | 1 |
| OR4C13   | chr11 | 49974877/T//A     | nonsynonymous | 0 | 1 |
| SHANK2   | chr11 | 70653176/C//T     | nonsynonymous | 0 | 1 |
| SLCO2B1  | chr11 | 74915475/A//G     | synonymous    | 0 | 1 |
| PAFAH1B2 | chr11 | 117038186/C//A    | nonsynonymous | 0 | 1 |
| SORL1    | chr11 | 121429469/C//T    | nonsynonymous | 0 | 1 |
| OR10S1   | chr11 | 123847696/TGAA//T | nonsynonymous | 0 | 1 |
| PZP      | chr12 | 9310401/C//A      | nonsynonymous | 0 | 1 |
| PIK3C2G  | chr12 | 18715683/T//G     | nonsynonymous | 0 | 1 |
| AMN1     | chr12 | 31850315/G//A     | nonsynonymous | 0 | 1 |
| NELL2    | chr12 | 45105162/G//T     | nonsynonymous | 0 | 1 |
| KMT2D    | chr12 | 49447055/C//A     | nonsynonymous | 0 | 1 |
| AMHR2    | chr12 | 53825073/A//G     | nonsynonymous | 0 | 1 |
| RASSF9   | chr12 | 86199033/T//G     | nonsynonymous | 0 | 1 |
| TMCC3    | chr12 | 94965451/T//G     | nonsynonymous | 0 | 1 |
| CAMKK2   | chr12 | 121711939/C//T    | nonsynonymous | 0 | 1 |
| PITPNM2  | chr12 | 123485680/C//T    | nonsynonymous | 0 | 1 |
| MPHOSPH9 | chr12 | 123678990/G//A    | synonymous    | 0 | 1 |
| POLE     | chr12 | 133201305/T//A    | nonsynonymous | 0 | 1 |
| RNF17    | chr13 | 25435416/T//A     | nonsynonymous | 0 | 1 |
| NBEA     | chr13 | 36006465/G//A     | nonsynonymous | 0 | 1 |
| GPR183   | chr13 | 99948240/C//A     | nonsynonymous | 0 | 1 |
| ITGBL1   | chr13 | 102231737/G//A    | nonsynonymous | 0 | 1 |
| IRS2     | chr13 | 110434954/G//A    | synonymous    | 0 | 1 |
| RNF31    | chr14 | 24617291/T//G     | nonsynonymous | 0 | 1 |
| FAM177A1 | chr14 | 35515734/C//T     | synonymous    | 0 | 1 |
| ERO1A    | chr14 | 53133093/T//G     | nonsynonymous | 0 | 1 |
| AREL1    | chr14 | 75139812/G//T     | nonsynonymous | 0 | 1 |
| YLPM1    | chr14 | 75245248/G//T     | nonsynonymous | 0 | 1 |
| ATG2B    | chr14 | 96798984/C//T     | nonsynonymous | 0 | 1 |
| ATG2B    | chr14 | 96798993/C//G     | nonsynonymous | 0 | 1 |
| CYFIP1   | chr15 | 22960813/A//G     | nonsynonymous | 0 | 1 |
| ZSCAN29  | chr15 | 43656313/C//T     | nonsynonymous | 0 | 1 |
| FBN1     | chr15 | 48703440/G//A     | nonsynonymous | 0 | 1 |
| UNC13C   | chr15 | 54306141/T//G     | synonymous    | 0 | 1 |
| CCDC78   | chr16 | 774980/C//T       | synonymous    | 0 | 1 |
| USP7     | chr16 | 9014215/C//T      | nonsynonymous | 0 | 1 |
| CDH11    | chr16 | 64984688/A//C     | nonsynonymous | 0 | 1 |
| PHLPP2   | chr16 | 71686829/G//A     | nonsynonymous | 0 | 1 |
| CYBA     | chr16 | 88709701/G//C     | synonymous    | 0 | 1 |
| NLRP1    | chr17 | 5436279/C//T      | synonymous    | 0 | 1 |
| MYO15A   | chr17 | 18023636/G//A     | nonsynonymous | 0 | 1 |
| TBX4     | chr17 | 59534026/G//A     | nonsynonymous | 0 | 1 |
| SCN4A    | chr17 | 62019236/C//T     | nonsynonymous | 0 | 1 |
| TMEM105  | chr17 | 79287759/C//G     | nonsynonymous | 0 | 1 |
| TXNDC2   | chr18 | 9886658/A//T      | nonsynonymous | 0 | 1 |
| OSBPL1A  | chr18 | 21921577/C//A     | nonsynonymous | 0 | 1 |
| LOXHD1   | chr18 | 44229200/G//A     | nonsynonymous | 0 | 1 |
| ADGRE2   | chr19 | 14862338/T//G     | nonsynonymous | 0 | 1 |
| HSH2D    | chr19 | 16268205/G//A     | synonymous    | 0 | 1 |
| AP1M1    | chr19 | 16319964/C//T     | synonymous    | 0 | 1 |
| LGALS14  | chr19 | 40195160/G//C     | synonymous    | 0 | 1 |
| MEGF8    | chr19 | 42875551/G//A     | nonsynonymous | 0 | 1 |
| PSG11    | chr19 | 43529202/A//C     | nonsynonymous | 0 | 1 |
| HAS1     | chr19 | 52222852/G//C     | synonymous    | 0 | 1 |
| RALGAPA2 | chr20 | 20486184/A//C     | synonymous    | 0 | 1 |
| CST8     | chr20 | 23472335/C//T     | nonsynonymous | 0 | 1 |



|          |       |                           |               |   |   |
|----------|-------|---------------------------|---------------|---|---|
| NCOA5    | chr20 | 44708080/G//T             | synonymous    | 0 | 1 |
| SALL4    | chr20 | 50408075/T//A             | nonsynonymous | 0 | 1 |
| TPTC     | chr21 | 10943025/G//C             | synonymous    | 0 | 1 |
| RSPH1    | chr21 | 43913192/G//C             | synonymous    | 0 | 1 |
| LZTR1    | chr22 | 21337331/A//T             | synonymous    | 0 | 1 |
| SH3BP1   | chr22 | 38039722/C//T             | nonsynonymous | 0 | 1 |
| C22orf23 | chr22 | 38347484/ATGTGGCGCTGCTG// | nonsynonymous | 0 | 1 |
| KDM5C    | chrX  | 53230858/C//T             | synonymous    | 0 | 1 |
| ZDHHC15  | chrX  | 74670630/A//G             | synonymous    | 0 | 1 |
| USP26    | chrX  | 132161785/A//T            | nonsynonymous | 0 | 1 |
| CDC14B   | chr9  | 99272029/T//C             | synonymous    | 0 | 1 |
| KREMEN2  | chr16 | 3018055/C//T              | synonymous    | 0 | 1 |
| CLEC18B  | chr16 | 74451990/A//G             | synonymous    | 0 | 1 |
| CDC27    | chr17 | 45214643/A//C             | synonymous    | 0 | 1 |
| CDC27    | chr17 | 45214648/G//C             | nonsynonymous | 0 | 1 |
| CDC27    | chr17 | 45214651/T//G             | nonsynonymous | 0 | 1 |
| CDC27    | chr17 | 45214654/C//T             | nonsynonymous | 0 | 1 |
| ZNF83    | chr19 | 53116867/G//A             | synonymous    | 0 | 1 |
| TTLL10   | chr1  | 1132059/T//C              | nonsynonymous | 0 | 1 |
| EXOSC10  | chr1  | 11147946/T//C             | nonsynonymous | 0 | 1 |
| POU2F1   | chr1  | 167381461/A//G            | synonymous    | 0 | 1 |
|          | chr1  | 247150512/G//A            | synonymous    | 0 | 1 |
| SLC16A14 | chr2  | 230914479/G//A            | nonsynonymous | 0 | 1 |
| CAND2    | chr3  | 12856892/C//A             | nonsynonymous | 0 | 1 |
|          | chr4  | 38054802/T//C             | synonymous    | 0 | 1 |
| SEC24B   | chr4  | 110402912/AGAG//A         | nonsynonymous | 0 | 1 |
| ADAMTS19 | chr5  | 128797427/T//C            | nonsynonymous | 0 | 1 |
| NEUROG1  | chr5  | 134871211/C//T            | nonsynonymous | 0 | 1 |
| PCDHGC5  | chr5  | 140869419/C//A            | synonymous    | 0 | 1 |
| FREM1    | chr9  | 14797646/A//T             | synonymous    | 0 | 1 |
| MUC5B    | chr11 | 1264742/G//C              | nonsynonymous | 0 | 1 |
| TNKS1BP1 | chr11 | 57080868/C//G             | nonsynonymous | 0 | 1 |
| AHNAK2   | chr14 | 105411957/G//A            | synonymous    | 0 | 1 |
| VPS4B    | chr18 | 61089516/A//G             | synonymous    | 0 | 1 |
| DNMT1    | chr19 | 10262449/G//T             | nonsynonymous | 0 | 1 |
| MAST1    | chr19 | 12984488/C//T             | nonsynonymous | 0 | 1 |
| ZNF208   | chr19 | 22156143/A//G             | nonsynonymous | 0 | 1 |
| GSPT2    | chrX  | 51488362/C//G             | nonsynonymous | 0 | 1 |
| NONO     | chrX  | 70516465/A//G             | nonsynonymous | 0 | 1 |
| TGIF2LX  | chrX  | 89177249/A//G             | synonymous    | 0 | 1 |
| THOC2    | chrX  | 122802038/T//C            | nonsynonymous | 0 | 1 |
| CASR     | chr3  | 122002833/C//T            | nonsynonymous | 1 | 0 |
| VEGFC    | chr4  | 177609015/C//A            | synonymous    | 1 | 0 |
| ZNF622   | chr5  | 16463367/C//G             | nonsynonymous | 1 | 0 |
| THSD7A   | chr7  | 11630234/G//T             | nonsynonymous | 1 | 0 |
| ZNF273   | chr7  | 64389263/T//C             | synonymous    | 1 | 0 |
| SAMD9    | chr7  | 92733853/C//A             | nonsynonymous | 1 | 0 |
| DLX6     | chr7  | 96635585/C//A             | nonsynonymous | 1 | 0 |
| TAF6     | chr7  | 99705993/C//A             | synonymous    | 1 | 0 |
| SLC12A9  | chr7  | 100459499/G//T            | synonymous    | 1 | 0 |
| MUC17    | chr7  | 100676260/G//A            | nonsynonymous | 1 | 0 |
| MUC17    | chr7  | 100676262/C//T            | nonsynonymous | 1 | 0 |
| MUC17    | chr7  | 100682639/T//C            | nonsynonymous | 1 | 0 |
| GCC1     | chr7  | 127224254/G//A            | nonsynonymous | 1 | 0 |
| FSCN3    | chr7  | 127236496/C//G            | nonsynonymous | 1 | 0 |
| DCSTAMP  | chr8  | 105361626/T//C            | synonymous    | 1 | 0 |
| WDYHV1   | chr8  | 124440257/G//T            | nonsynonymous | 1 | 0 |
| ZNF7     | chr8  | 146066742/T//C            | nonsynonymous | 1 | 0 |
| STARD9   | chr15 | 43008875/G//C             | nonsynonymous | 1 | 0 |
| CA12     | chr15 | 63637706/G//C             | nonsynonymous | 1 | 0 |
|          | chr15 | 65992923/C//A             | synonymous    | 1 | 0 |
| CACNA1G  | chr17 | 48652912/C//A             | synonymous    | 1 | 0 |
| RASIP1   | chr19 | 49232760/A//AC            | nonsynonymous | 1 | 0 |
| PPFIA3   | chr19 | 49632690/G//T             | nonsynonymous | 1 | 0 |
| LZTR1    | chr22 | 21346649/T//C             | synonymous    | 1 | 0 |
| MCF2     | chrX  | 138724739/A//G            | synonymous    | 1 | 0 |
| PLCH2    | chr1  | 2428283/G//C              | nonsynonymous | 0 | 1 |
| OR2AK2   | chr1  | 248128832/A//G            | nonsynonymous | 0 | 1 |
| SP140    | chr2  | 231115734/G//T            | nonsynonymous | 0 | 1 |
| ABI3BP   | chr3  | 100569519/G//A            | nonsynonymous | 0 | 1 |

|           |       |                |               |   |   |
|-----------|-------|----------------|---------------|---|---|
| LRRC15    | chr3  | 194081215/G//A | synonymous    | 0 | 1 |
| ARHGAP24  | chr4  | 86491743/C//T  | nonsynonymous | 0 | 1 |
| SEC24B    | chr4  | 110448573/C//G | nonsynonymous | 0 | 1 |
| KIAA1109  | chr4  | 123166278/A//G | nonsynonymous | 0 | 1 |
| SLC25A2   | chr5  | 140683333/T//A | nonsynonymous | 0 | 1 |
| TENM2     | chr5  | 167645219/C//T | synonymous    | 0 | 1 |
| CEP162    | chr6  | 84884484/A//G  | nonsynonymous | 0 | 1 |
| CTTNBP2   | chr7  | 117407125/G//A | synonymous    | 0 | 1 |
| GTF3C4    | chr9  | 135546293/T//C | nonsynonymous | 0 | 1 |
| VAV2      | chr9  | 136635554/A//T | nonsynonymous | 0 | 1 |
| CAMK1D    | chr10 | 12870807/C//T  | nonsynonymous | 0 | 1 |
| CDH23     | chr10 | 73491904/C//T  | synonymous    | 0 | 1 |
| NRAP      | chr10 | 115368195/A//C | nonsynonymous | 0 | 1 |
| LRRC55    | chr11 | 56954716/C//T  | synonymous    | 0 | 1 |
| RSF1      | chr11 | 77451933/T//G  | nonsynonymous | 0 | 1 |
| TAGLN     | chr11 | 117074140/G//A | nonsynonymous | 0 | 1 |
|           | chr11 | 128804929/C//G | synonymous    | 0 | 1 |
| FAIM2     | chr12 | 50264148/C//G  | synonymous    | 0 | 1 |
| LOC283710 | chr15 | 31522990/A//G  | synonymous    | 0 | 1 |
| MAPKBP1   | chr15 | 42117624/G//A  | nonsynonymous | 0 | 1 |
| CNDP2     | chr18 | 72180911/T//C  | nonsynonymous | 0 | 1 |
| TSHZ1     | chr18 | 72998791/C//T  | nonsynonymous | 0 | 1 |
| PCSK4     | chr19 | 1490397/C//T   | synonymous    | 0 | 1 |
| ZNF266    | chr19 | 9523870/T//TA  | synonymous    | 0 | 1 |
| DOCK6     | chr19 | 11332540/C//T  | synonymous    | 0 | 1 |
| ALKBH6    | chr19 | 36501839/T//C  | nonsynonymous | 0 | 1 |
| PLCB4     | chr20 | 9389753/G//T   | nonsynonymous | 0 | 1 |
| RNF220    | chr1  | 45101728/T//C  | synonymous    | 0 | 1 |
| PGLYRP3   | chr1  | 153270488/A//G | nonsynonymous | 0 | 1 |
| LMLN      | chr3  | 197687156/T//C | nonsynonymous | 0 | 1 |
| FAT4      | chr4  | 126389938/A//G | synonymous    | 0 | 1 |
| MCUR1     | chr6  | 13792139/T//C  | nonsynonymous | 0 | 1 |
| AGPAT5    | chr8  | 6588351/A//G   | synonymous    | 0 | 1 |
| LY96      | chr8  | 74917041/A//G  | synonymous    | 0 | 1 |
| HDHD3     | chr9  | 116136099/A//C | nonsynonymous | 0 | 1 |
| TSPAN18   | chr11 | 44950703/A//G  | nonsynonymous | 0 | 1 |
| BTBD18    | chr11 | 57511734/T//C  | nonsynonymous | 0 | 1 |
| ABCD2     | chr12 | 39947686/A//G  | synonymous    | 0 | 1 |
| SBNO1     | chr12 | 123834868/A//G | nonsynonymous | 0 | 1 |
| STX4      | chr16 | 31045861/A//G  | synonymous    | 0 | 1 |
| SCARF1    | chr17 | 1538482/A//G   | nonsynonymous | 0 | 1 |
| SPATA20   | chr17 | 48628085/G//A  | nonsynonymous | 0 | 1 |
| MAP3K3    | chr17 | 61771097/A//G  | nonsynonymous | 0 | 1 |
| RNF213    | chr17 | 78263537/A//G  | nonsynonymous | 0 | 1 |
| CYP4F3    | chr19 | 15770027/A//T  | synonymous    | 0 | 1 |
| CFAP61    | chr20 | 20232263/T//C  | synonymous    | 0 | 1 |
| GABPA     | chr21 | 27117611/A//G  | synonymous    | 0 | 1 |
| KRTAP10-5 | chr21 | 45999963/A//T  | nonsynonymous | 0 | 1 |
| A4GALT    | chr22 | 43089941/T//C  | nonsynonymous | 0 | 1 |
| KLHL15    | chrX  | 24024389/T//C  | nonsynonymous | 0 | 1 |
| GNB1      | chr1  | 1756910/C//T   | synonymous    | 0 | 1 |
| OR10Z1    | chr1  | 158576955/T//G | nonsynonymous | 0 | 1 |
| EXOC8     | chr1  | 231471992/G//A | synonymous    | 0 | 1 |
| CCDC141   | chr2  | 179702381/C//T | nonsynonymous | 0 | 1 |
| PGAP1     | chr2  | 197729782/G//C | nonsynonymous | 0 | 1 |
| OBSL1     | chr2  | 220427387/G//A | nonsynonymous | 0 | 1 |
| ALG1L2    | chr3  | 129810972/C//T | nonsynonymous | 0 | 1 |
| RASGEF1B  | chr4  | 82368684/G//A  | nonsynonymous | 0 | 1 |
| KDM3B     | chr5  | 137727034/C//T | synonymous    | 0 | 1 |
| ICK       | chr6  | 52874346/G//A  | synonymous    | 0 | 1 |
| EPHA7     | chr6  | 93956542/A//C  | nonsynonymous | 0 | 1 |
| ESR1      | chr6  | 152265445/C//T | nonsynonymous | 0 | 1 |
| TRRAP     | chr7  | 98610000/G//A  | synonymous    | 0 | 1 |
| PENK      | chr8  | 57354070/A//C  | nonsynonymous | 0 | 1 |
| C8orf87   | chr8  | 94179040/G//T  | synonymous    | 0 | 1 |
| ADGRB1    | chr8  | 143546219/G//A | synonymous    | 0 | 1 |
| PFKP      | chr10 | 3174577/C//T   | synonymous    | 0 | 1 |
| FAM149B1  | chr10 | 74937633/T//G  | nonsynonymous | 0 | 1 |
| FGFR2     | chr10 | 123256169/C//G | nonsynonymous | 0 | 1 |
| OVCH2     | chr11 | 7726152/A//T   | nonsynonymous | 0 | 1 |

|           |       |                   |               |   |   |
|-----------|-------|-------------------|---------------|---|---|
| PAX6      | chr11 | 31823185/C//A     | nonsynonymous | 0 | 1 |
| GRAMD1B   | chr11 | 123464880/T//A    | synonymous    | 0 | 1 |
| KRT84     | chr12 | 52779085/C//A     | synonymous    | 0 | 1 |
| PTPRQ     | chr12 | 80899949/A//C     | nonsynonymous | 0 | 1 |
| DMXL2     | chr15 | 51828855/G//A     | nonsynonymous | 0 | 1 |
| WDR72     | chr15 | 53815505/C//A     | nonsynonymous | 0 | 1 |
| ZSCAN10   | chr16 | 3139914/G//A      | synonymous    | 0 | 1 |
| MGRN1     | chr16 | 4714719/G//T      | nonsynonymous | 0 | 1 |
| CSNK1D    | chr17 | 80206849/G//A     | nonsynonymous | 0 | 1 |
| DSC1      | chr18 | 28711608/G//T     | synonymous    | 0 | 1 |
| TRMT1     | chr19 | 13221039/C//T     | nonsynonymous | 0 | 1 |
| ZNF208    | chr19 | 22154503/T//C     | synonymous    | 0 | 1 |
| SULT2B1   | chr19 | 49094891/G//A     | nonsynonymous | 0 | 1 |
| C19orf84  | chr19 | 51893761/T//C     | synonymous    | 0 | 1 |
| ZNF836    | chr19 | 52660639/C//T     | synonymous    | 0 | 1 |
| MGAT3     | chr22 | 39883471/C//T     | nonsynonymous | 0 | 1 |
| GRIPAP1   | chrX  | 48839501/G//A     | nonsynonymous | 0 | 1 |
| L1CAM     | chrX  | 153134029/G//A    | synonymous    | 0 | 1 |
| CTNNA2    | chr2  | 80136928/G//A     | synonymous    | 0 | 1 |
| CCNT2     | chr2  | 135712242/C//T    | synonymous    | 0 | 1 |
| BAP1      | chr3  | 52436267/C//T     | synonymous    | 0 | 1 |
| SMC4      | chr3  | 160130142/A//G    | nonsynonymous | 0 | 1 |
| AFF1      | chr4  | 88029402/TCAGA//T | nonsynonymous | 0 | 1 |
| GHR       | chr5  | 42719249/C//A     | nonsynonymous | 0 | 1 |
| RNF5      | chr6  | 32148107/A//G     | synonymous    | 0 | 1 |
| ADGRB3    | chr6  | 69666056/G//T     | nonsynonymous | 0 | 1 |
| WIPI2     | chr7  | 5270618/T//C      | synonymous    | 0 | 1 |
| MUC17     | chr7  | 100684790/G//A    | nonsynonymous | 0 | 1 |
| VPS13B    | chr8  | 100829981/A//G    | nonsynonymous | 0 | 1 |
| SLC38A2   | chr12 | 46757700/TACTC//T | synonymous    | 0 | 1 |
| FGD6      | chr12 | 95603492/G//C     | nonsynonymous | 0 | 1 |
| KIAA0556  | chr16 | 27763232/G//A     | nonsynonymous | 0 | 1 |
| TEN1      | chr17 | 73996244/G//A     | synonymous    | 0 | 1 |
| LOXHD1    | chr18 | 44146331/G//A     | nonsynonymous | 0 | 1 |
| S1PR4     | chr19 | 3179191/T//C      | nonsynonymous | 0 | 1 |
| ADAMTS10  | chr19 | 8650345/A//G      | nonsynonymous | 0 | 1 |
| ZBTB45    | chr19 | 59025341/A//G     | synonymous    | 0 | 1 |
| SS18L1    | chr20 | 60738567/G//A     | nonsynonymous | 0 | 1 |
| RPS6KA3   | chrX  | 20183018/T//C     | nonsynonymous | 0 | 1 |
| ARHGEF10L | chr1  | 17934289/G//A     | synonymous    | 0 | 1 |
| C1orf94   | chr1  | 34663360/G//C     | synonymous    | 0 | 1 |
| SLC1A7    | chr1  | 53569209/G//T     | nonsynonymous | 0 | 1 |
| PDE4DIP   | chr1  | 144856900/C//T    | synonymous    | 0 | 1 |
| SCAMP3    | chr1  | 155226201/A//C    | nonsynonymous | 0 | 1 |
| NPHS2     | chr1  | 179530429/C//T    | nonsynonymous | 0 | 1 |
| NCF2      | chr1  | 183542323/C//T    | synonymous    | 0 | 1 |
| EIF2D     | chr1  | 206776391/C//T    | nonsynonymous | 0 | 1 |
| FMN2      | chr1  | 240255801/C//T    | nonsynonymous | 0 | 1 |
| TPO       | chr2  | 1507741/G//T      | nonsynonymous | 0 | 1 |
| PXDN      | chr2  | 1648512/C//G      | synonymous    | 0 | 1 |
| ITSN2     | chr2  | 24521629/G//A     | nonsynonymous | 0 | 1 |
| CLIP4     | chr2  | 29404441/G//A     | synonymous    | 0 | 1 |
| CWC22     | chr2  | 180838512/G//T    | nonsynonymous | 0 | 1 |
| CREB1     | chr2  | 208461769/A//G    | nonsynonymous | 0 | 1 |
| SPAG16    | chr2  | 214794853/A//T    | nonsynonymous | 0 | 1 |
| IGFBP5    | chr2  | 217541438/T//A    | synonymous    | 0 | 1 |
| EPHA4     | chr2  | 222301844/T//C    | nonsynonymous | 0 | 1 |
| RBP1      | chr3  | 139258420/C//G    | nonsynonymous | 0 | 1 |
| ARHGEF26  | chr3  | 153912502/A//C    | nonsynonymous | 0 | 1 |
| TMEM175   | chr4  | 945016/A//G       | synonymous    | 0 | 1 |
| SH3TC1    | chr4  | 8218826/G//A      | synonymous    | 0 | 1 |
| CEP135    | chr4  | 56865746/C//G     | nonsynonymous | 0 | 1 |
| GRIA2     | chr4  | 158284007/C//T    | synonymous    | 0 | 1 |
| ADAMTS12  | chr5  | 33596160/G//A     | nonsynonymous | 0 | 1 |
| ZFP62     | chr5  | 180277836/G//T    | nonsynonymous | 0 | 1 |
| BTN2A1    | chr6  | 26468702/C//G     | synonymous    | 0 | 1 |
| GPX5      | chr6  | 28501782/T//C     | synonymous    | 0 | 1 |
| MRPS18B   | chr6  | 30593463/T//C     | synonymous    | 0 | 1 |
| CD109     | chr6  | 74440269/A//G     | nonsynonymous | 0 | 1 |
| LCA5      | chr6  | 80223150/C//A     | nonsynonymous | 0 | 1 |

|            |       |                  |               |   |   |
|------------|-------|------------------|---------------|---|---|
| SYNE1      | chr6  | 152652849/C//T   | nonsynonymous | 0 | 1 |
| DNAH11     | chr7  | 21939024/G//A    | nonsynonymous | 0 | 1 |
| STK31      | chr7  | 23823196/C//A    | synonymous    | 0 | 1 |
| ASB15      | chr7  | 123269198/C//G   | nonsynonymous | 0 | 1 |
| MYBL1      | chr8  | 67477030/C//T    | nonsynonymous | 0 | 1 |
| ZNF16      | chr8  | 146157094/C//T   | nonsynonymous | 0 | 1 |
| ARMC3      | chr10 | 23326314/C//A    | nonsynonymous | 0 | 1 |
| EGR2       | chr10 | 64572891/G//T    | synonymous    | 0 | 1 |
| JMJD1C     | chr10 | 64973993/A//C    | nonsynonymous | 0 | 1 |
| SLIT1      | chr10 | 98763926/T//C    | nonsynonymous | 0 | 1 |
| R3HCC1L    | chr10 | 99968930/T//C    | synonymous    | 0 | 1 |
| ASRGL1     | chr11 | 62124620/A//C    | synonymous    | 0 | 1 |
| VEGFB      | chr11 | 64005838/C//T    | synonymous    | 0 | 1 |
| TMTC1      | chr12 | 29673632/C//A    | nonsynonymous | 0 | 1 |
| KIF21A     | chr12 | 39740293/C//A    | nonsynonymous | 0 | 1 |
| SSH1       | chr12 | 109186370/A//C   | nonsynonymous | 0 | 1 |
| CIT        | chr12 | 120152003/G//A   | synonymous    | 0 | 1 |
| RPLP0      | chr12 | 120638605/A//G   | synonymous    | 0 | 1 |
| GSX1       | chr13 | 28368072/C//T    | nonsynonymous | 0 | 1 |
| BIVM-ERCC5 | chr13 | 103528250/C//T   | synonymous    | 0 | 1 |
| PCNX1      | chr14 | 71500737/A//C    | nonsynonymous | 0 | 1 |
| RTF1       | chr15 | 41750023/G//A    | nonsynonymous | 0 | 1 |
| UNC45A     | chr15 | 91479641/A//C    | nonsynonymous | 0 | 1 |
| CDIP1      | chr16 | 4562631/A//G     | nonsynonymous | 0 | 1 |
| CES2       | chr16 | 66972112/T//C    | synonymous    | 0 | 1 |
| WNT3       | chr17 | 44845917/G//T    | nonsynonymous | 0 | 1 |
| COL1A1     | chr17 | 48272129/G//A    | nonsynonymous | 0 | 1 |
| RNF213     | chr17 | 78321349/T//C    | nonsynonymous | 0 | 1 |
| ADGRE1     | chr19 | 6887606/A//G     | synonymous    | 0 | 1 |
| OLFM2      | chr19 | 9968104/A//C     | nonsynonymous | 0 | 1 |
| CCDC105    | chr19 | 15121827/C//T    | nonsynonymous | 0 | 1 |
| NOTCH3     | chr19 | 15276255/C//T    | synonymous    | 0 | 1 |
| ZNF676     | chr19 | 22362888/C//G    | nonsynonymous | 0 | 1 |
| ZNF676     | chr19 | 22362898/C//A    | nonsynonymous | 0 | 1 |
| ZNF223     | chr19 | 44564724/G//T    | synonymous    | 0 | 1 |
| C5AR1      | chr19 | 47823135/G//A    | nonsynonymous | 0 | 1 |
| ZNF480     | chr19 | 52825419/C//G    | nonsynonymous | 0 | 1 |
| RALGAPB    | chr20 | 37191223/G//C    | nonsynonymous | 0 | 1 |
| APOBEC3C   | chr22 | 39414309/GATA//G | nonsynonymous | 0 | 1 |
| MEI1       | chr22 | 42154467/G//C    | nonsynonymous | 0 | 1 |
| MOV10L1    | chr22 | 50580514/G//C    | nonsynonymous | 0 | 1 |
| USP51      | chrX  | 55513535/A//G    | nonsynonymous | 0 | 1 |
| DGAT2L6    | chrX  | 69419128/T//C    | synonymous    | 0 | 1 |
| ATRX       | chrX  | 76855247/C//G    | nonsynonymous | 0 | 1 |
| LRCH2      | chrX  | 114414073/C//T   | nonsynonymous | 0 | 1 |
| FMR1       | chrX  | 147011561/G//T   | nonsynonymous | 0 | 1 |
| MAGEA10    | chrX  | 151303608/T//C   | nonsynonymous | 0 | 1 |
| ACAP3      | chr1  | 1229464/T//C     | synonymous    | 0 | 1 |
| AURKAIP1   | chr1  | 1309159/G//T     | synonymous    | 0 | 1 |
| ILDR2      | chr1  | 166927263/C//T   | nonsynonymous | 0 | 1 |
| MAP3K2     | chr2  | 128087571/T//C   | nonsynonymous | 0 | 1 |
| KCNH7      | chr2  | 163374576/C//T   | nonsynonymous | 0 | 1 |
| CHRNA1     | chr2  | 175612935/G//A   | nonsynonymous | 0 | 1 |
| C2orf54    | chr2  | 241829520/C//T   | nonsynonymous | 0 | 1 |
| SETD2      | chr3  | 47108598/C//T    | nonsynonymous | 0 | 1 |
| STAB1      | chr3  | 52544193/TCTC//T | nonsynonymous | 0 | 1 |
| PDGFC      | chr4  | 157693833/C//T   | synonymous    | 0 | 1 |
| CDH6       | chr5  | 31317954/C//T    | nonsynonymous | 0 | 1 |
| PCDHB13    | chr5  | 140594626/G//A   | nonsynonymous | 0 | 1 |
| SNAP91     | chr6  | 84366469/C//A    | synonymous    | 0 | 1 |
| ADCY1      | chr7  | 45701752/G//A    | nonsynonymous | 0 | 1 |
| TRPV5      | chr7  | 142627457/G//A   | synonymous    | 0 | 1 |
| DNAJC25    | chr9  | 114393692/G//C   | nonsynonymous | 0 | 1 |
| ITIH5      | chr10 | 7605017/T//G     | synonymous    | 0 | 1 |
| FAM170B    | chr10 | 50341994/C//T    | synonymous    | 0 | 1 |
| TCF7L2     | chr10 | 114912149/C//T   | nonsynonymous | 0 | 1 |
| MUC5B      | chr11 | 1272570/T//A     | synonymous    | 0 | 1 |
| CAPN1      | chr11 | 64950983/C//G    | nonsynonymous | 0 | 1 |
| P4HA3      | chr11 | 73979206/C//A    | synonymous    | 0 | 1 |
| KMT2D      | chr12 | 49426280/A//T    | nonsynonymous | 0 | 1 |

|          |       |                          |               |   |   |
|----------|-------|--------------------------|---------------|---|---|
| PPFIA2   | chr12 | 81751992/G//A            | nonsynonymous | 0 | 1 |
| RALGAPA1 | chr14 | 36278108/T//C            | synonymous    | 0 | 1 |
| TSHR     | chr14 | 81609934/C//T            | nonsynonymous | 0 | 1 |
| BCL11B   | chr14 | 99640811/T//C            | nonsynonymous | 0 | 1 |
| MAN2A2   | chr15 | 91449992/G//T            | nonsynonymous | 0 | 1 |
| TP53     | chr17 | 7578381/TGAGCAGCGCTCATGG | nonsynonymous | 0 | 1 |
| DNAH2    | chr17 | 7680960/A//G             | synonymous    | 0 | 1 |
| TOM1L1   | chr17 | 52978229/G//T            | nonsynonymous | 0 | 1 |
| LGALS3BP | chr17 | 76972097/A//G            | nonsynonymous | 0 | 1 |
| RNF213   | chr17 | 78311721/A//G            | nonsynonymous | 0 | 1 |
| SMCHD1   | chr18 | 2694612/G//A             | nonsynonymous | 0 | 1 |
| SMAD7    | chr18 | 46448268/A//G            | nonsynonymous | 0 | 1 |
| NR2F6    | chr19 | 17343260/G//A            | synonymous    | 0 | 1 |
| HKR1     | chr19 | 37835677/G//A            | nonsynonymous | 0 | 1 |
| HRC      | chr19 | 49657345/T//C            | nonsynonymous | 0 | 1 |
| A1BG     | chr19 | 58861853/A//G            | nonsynonymous | 0 | 1 |
| LBP      | chr20 | 36982695/G//T            | nonsynonymous | 0 | 1 |
| EYA2     | chr20 | 45702829/C//G            | nonsynonymous | 0 | 1 |
| DIDO1    | chr20 | 61525207/G//A            | nonsynonymous | 0 | 1 |
| CACNG2   | chr22 | 36960800/G//A            | synonymous    | 0 | 1 |
| PLCXD1   | chrX  | 209787/A//G              | nonsynonymous | 0 | 1 |
| CSF2RA   | chrX  | 1407734/G//A             | synonymous    | 0 | 1 |
| CSF1     | chr1  | 110465892/C//T           | nonsynonymous | 0 | 1 |
| ARNT     | chr1  | 150849036/G//C           | nonsynonymous | 0 | 1 |
| GRM7     | chr3  | 6903418/G//A             | nonsynonymous | 0 | 1 |
| PTPN23   | chr3  | 47448087/C//T            | synonymous    | 0 | 1 |
| C3orf22  | chr3  | 126272281/A//G           | synonymous    | 0 | 1 |
| GPR149   | chr3  | 154055972/G//T           | nonsynonymous | 0 | 1 |
| SI       | chr3  | 164712053/A//G           | synonymous    | 0 | 1 |
| MSX1     | chr4  | 4864599/C//T             | nonsynonymous | 0 | 1 |
| GRID2    | chr4  | 94344060/T//G            | nonsynonymous | 0 | 1 |
| APC      | chr5  | 112128206/T//C           | nonsynonymous | 0 | 1 |
| PCDHGA5  | chr5  | 140745223/A//C           | synonymous    | 0 | 1 |
| MELK     | chr9  | 36633188/C//T            | synonymous    | 0 | 1 |
| SCAI     | chr9  | 127733651/G//A           | nonsynonymous | 0 | 1 |
| RNF169   | chr11 | 74460312/G//A            | synonymous    | 0 | 1 |
| RILPL1   | chr12 | 124017805/G//A           | synonymous    | 0 | 1 |
| SPG11    | chr15 | 44876252/C//T            | nonsynonymous | 0 | 1 |
| SLC43A2  | chr17 | 1531170/G//A             | synonymous    | 0 | 1 |
| SLC26A11 | chr17 | 78199707/A//G            | synonymous    | 0 | 1 |
| ANO8     | chr19 | 17435562/C//T            | nonsynonymous | 0 | 1 |
| FCGBP    | chr19 | 40430514/C//T            | nonsynonymous | 0 | 1 |
| ZIM3     | chr19 | 57646336/C//T            | nonsynonymous | 0 | 1 |
| ZNF530   | chr19 | 58117835/A//T            | nonsynonymous | 0 | 1 |
| AAR2     | chr20 | 34828241/G//A            | nonsynonymous | 0 | 1 |
| PAXBP1   | chr21 | 34123526/T//G            | nonsynonymous | 0 | 1 |
| IGSF1    | chrX  | 130408613/C//T           | nonsynonymous | 0 | 1 |
| MCF2     | chrX  | 138669937/T//A           | nonsynonymous | 0 | 1 |
| KCNH7    | chr2  | 163374251/T//C           | nonsynonymous | 0 | 1 |
| DHX36    | chr3  | 154042007/C//T           | nonsynonymous | 0 | 1 |
| DCTN4    | chr5  | 150110638/T//C           | nonsynonymous | 0 | 1 |
| VARS2    | chr6  | 30882929/T//C            | synonymous    | 0 | 1 |
| MICAL1   | chr6  | 109775394/A//T           | synonymous    | 0 | 1 |
| PTPRK    | chr6  | 128330369/G//A           | nonsynonymous | 0 | 1 |
| HOXA1    | chr7  | 27135437/T//C            | nonsynonymous | 0 | 1 |
| AASS     | chr7  | 121756788/A//C           | nonsynonymous | 0 | 1 |
| ZNF425   | chr7  | 148802010/G//A           | nonsynonymous | 0 | 1 |
| IPPK     | chr9  | 95396747/G//A            | nonsynonymous | 0 | 1 |
| XPA      | chr9  | 100459581/C//A           | synonymous    | 0 | 1 |
| FZD8     | chr10 | 35930179/T//C            | nonsynonymous | 0 | 1 |
| TALDO1   | chr11 | 747450/G//A              | synonymous    | 0 | 1 |
| NUP98    | chr11 | 3793076/C//T             | nonsynonymous | 0 | 1 |
| LRP5     | chr11 | 68115681/C//T            | nonsynonymous | 0 | 1 |
| NLRX1    | chr11 | 119045358/A//G           | nonsynonymous | 0 | 1 |
| VWF      | chr12 | 6172164/C//T             | nonsynonymous | 0 | 1 |
| HECTD4   | chr12 | 112623041/C//T           | synonymous    | 0 | 1 |
| ATP6V0A2 | chr12 | 124203253/G//A           | synonymous    | 0 | 1 |
| AHNAK2   | chr14 | 105409721/C//T           | nonsynonymous | 0 | 1 |
| PRTG     | chr15 | 55929504/T//TG           | nonsynonymous | 0 | 1 |
| SCAPER   | chr15 | 77021000/G//A            | nonsynonymous | 0 | 1 |

|                |       |                          |               |   |   |
|----------------|-------|--------------------------|---------------|---|---|
| ZFHX3          | chr16 | 72831900/G//A            | synonymous    | 0 | 1 |
| PIEZO1         | chr16 | 88783576/T//C            | nonsynonymous | 0 | 1 |
| RNF135         | chr17 | 29298258/G//T            | nonsynonymous | 0 | 1 |
| HDAC5          | chr17 | 42160935/T//C            | nonsynonymous | 0 | 1 |
| TBC1D16        | chr17 | 77984383/A//G            | nonsynonymous | 0 | 1 |
| CBLN2          | chr18 | 70209237/G//A            | synonymous    | 0 | 1 |
| KRTAP10-1      | chr21 | 45959724/A//G            | nonsynonymous | 0 | 1 |
| SHOX           | chrX  | 591627/C//T              | synonymous    | 0 | 1 |
| ESPN           | chr1  | 6511917/T//C             | nonsynonymous | 0 | 1 |
| FLG            | chr1  | 152282662/C//T           | nonsynonymous | 0 | 1 |
| DENND4B        | chr1  | 153914749/C//G           | nonsynonymous | 0 | 1 |
| LYST           | chr1  | 235969483/CAAGCCTATAA//C | nonsynonymous | 0 | 1 |
| TRIM58         | chr1  | 248039736/G//T           | nonsynonymous | 0 | 1 |
| OR2L3          | chr1  | 248224618/C//G           | nonsynonymous | 0 | 1 |
| ZNF385D        | chr3  | 21552504/C//T            | synonymous    | 0 | 1 |
| ARIH2          | chr3  | 49006000/G//A            | nonsynonymous | 0 | 1 |
| PRR27          | chr4  | 71024177/A//G            | nonsynonymous | 0 | 1 |
| MRPL1          | chr4  | 78830471/A//G            | nonsynonymous | 0 | 1 |
| CYP21A2        | chr6  | 31975246/A//G            | nonsynonymous | 0 | 1 |
| FAM184A        | chr6  | 119345743/T//G           | nonsynonymous | 0 | 1 |
| CUX1           | chr7  | 101740713/C//G           | nonsynonymous | 0 | 1 |
| C7orf55-LUC7L2 | chr7  | 139094332/G//A           | synonymous    | 0 | 1 |
| RSPO2          | chr8  | 109001362/G//A           | nonsynonymous | 0 | 1 |
| PLEC           | chr8  | 145007382/G//A           | synonymous    | 0 | 1 |
| CNTNAP3B       | chr9  | 43861150/G//A            | nonsynonymous | 0 | 1 |
| TLE1           | chr9  | 84208155/T//C            | nonsynonymous | 0 | 1 |
| PPP1R32        | chr11 | 61249390/G//A            | nonsynonymous | 0 | 1 |
| SRRM4          | chr12 | 119568591/G//A           | synonymous    | 0 | 1 |
| CARS2          | chr13 | 111335443/A//G           | nonsynonymous | 0 | 1 |
| RPS6KL1        | chr14 | 75376355/C//T            | synonymous    | 0 | 1 |
| AHNAK2         | chr14 | 105417837/A//G           | synonymous    | 0 | 1 |
| HERC2          | chr15 | 28463760/A//G            | nonsynonymous | 0 | 1 |
| KLHL25         | chr15 | 86312695/T//C            | nonsynonymous | 0 | 1 |
| ENPP7          | chr17 | 77709384/G//A            | synonymous    | 0 | 1 |
| LMNB2          | chr19 | 2431858/T//C             | nonsynonymous | 0 | 1 |
| LMTK3          | chr19 | 49004271/A//G            | nonsynonymous | 0 | 1 |
| L3MBTL1        | chr20 | 42143284/A//C            | nonsynonymous | 0 | 1 |
| ADAMTS1        | chr21 | 28212236/G//A            | nonsynonymous | 0 | 1 |
| TIAM1          | chr21 | 32595738/G//T            | nonsynonymous | 0 | 1 |
| HDX            | chrX  | 83591858/G//T            | nonsynonymous | 0 | 1 |
| PRAMEF1        | chr1  | 12855721/G//A            | nonsynonymous | 0 | 1 |
| FAM46B         | chr1  | 27332618/C//T            | synonymous    | 0 | 1 |
| ATXN7L2        | chr1  | 110030371/T//C           | synonymous    | 0 | 1 |
| C1orf198       | chr1  | 230979385/C//A           | nonsynonymous | 0 | 1 |
| EIF2AK3        | chr2  | 88870428/T//A            | synonymous    | 0 | 1 |
| CCDC141        | chr2  | 179701781/G//A           | nonsynonymous | 0 | 1 |
| FN1            | chr2  | 216259331/G//T           | nonsynonymous | 0 | 1 |
| SEPT2          | chr2  | 242277146/C//T           | nonsynonymous | 0 | 1 |
| NBEAL2         | chr3  | 47041434/C//G            | nonsynonymous | 0 | 1 |
| ATP13A3        | chr3  | 194175013/C//T           | nonsynonymous | 0 | 1 |
| UNC5C          | chr4  | 96199504/T//G            | nonsynonymous | 0 | 1 |
| PCDHA12        | chr5  | 140257256/G//A           | synonymous    | 0 | 1 |
| PGK2           | chr6  | 49753902/T//A            | synonymous    | 0 | 1 |
| SOBP           | chr6  | 107955326/G//A           | synonymous    | 0 | 1 |
| SF3B5          | chr6  | 144416555/G//A           | nonsynonymous | 0 | 1 |
| PCLO           | chr7  | 82586093/G//T            | synonymous    | 0 | 1 |
| ZAN            | chr7  | 100331777/C//G           | synonymous    | 0 | 1 |
| MCPH1          | chr8  | 6299584/T//G             | synonymous    | 0 | 1 |
| GLI4           | chr8  | 144358341/A//G           | synonymous    | 0 | 1 |
| WNK2           | chr9  | 96051273/A//G            | nonsynonymous | 0 | 1 |
| SDHAF2         | chr11 | 61205189/C//A            | synonymous    | 0 | 1 |
| MYO16          | chr13 | 109535423/T//A           | nonsynonymous | 0 | 1 |
| ZNF839         | chr14 | 102792579/G//T           | synonymous    | 0 | 1 |
| RPLP1          | chr15 | 69745341/C//T            | synonymous    | 0 | 1 |
|                | chr15 | 74327709/C//T            | synonymous    | 0 | 1 |
| RAB40C         | chr16 | 677575/CAG//C            | nonsynonymous | 0 | 1 |
| CRISPLD2       | chr16 | 84883102/C//T            | synonymous    | 0 | 1 |
| HOXB3          | chr17 | 46627936/G//A            | synonymous    | 0 | 1 |
| LOXHD1         | chr18 | 44157825/G//A            | synonymous    | 0 | 1 |
| PNPLA6         | chr19 | 7621540/G//A             | nonsynonymous | 0 | 1 |

|           |       |                     |               |   |   |
|-----------|-------|---------------------|---------------|---|---|
| LDLR      | chr19 | 11200178/G//A       | synonymous    | 0 | 1 |
| PSG6      | chr19 | 43420585/G//C       | nonsynonymous | 0 | 1 |
| CKM       | chr19 | 45810055/ACTT//A    | nonsynonymous | 0 | 1 |
| TMC4      | chr19 | 54664092/AAGACTT//A | nonsynonymous | 0 | 1 |
| NLRP8     | chr19 | 56487554/T//C       | nonsynonymous | 0 | 1 |
| EYA2      | chr20 | 45633652/C//T       | nonsynonymous | 0 | 1 |
| IDS       | chrX  | 148579841/T//A      | synonymous    | 0 | 1 |
| TMIGD3    | chr1  | 112031612/G//T      | nonsynonymous | 0 | 1 |
| ROBO2     | chr3  | 77693915/C//A       | nonsynonymous | 0 | 1 |
| SEC61A1   | chr3  | 127779466/G//A      | nonsynonymous | 0 | 1 |
| KIAA0232  | chr4  | 6882650/T//C        | nonsynonymous | 0 | 1 |
| GUF1      | chr4  | 44684392/C//T       | synonymous    | 0 | 1 |
| MMRN1     | chr4  | 90856821/A//G       | nonsynonymous | 0 | 1 |
| ZGRF1     | chr4  | 113540373/T//C      | synonymous    | 0 | 1 |
| SETD7     | chr4  | 140439129/A//G      | nonsynonymous | 0 | 1 |
| CLDN22    | chr4  | 184240951/C//A      | nonsynonymous | 0 | 1 |
| FAM71B    | chr5  | 156592669/G//A      | nonsynonymous | 0 | 1 |
| RP1       | chr8  | 55533727/G//T       | synonymous    | 0 | 1 |
| RP1       | chr8  | 55542929/ACT//A     | synonymous    | 0 | 1 |
| C8orf89   | chr8  | 74171568/T//C       | synonymous    | 0 | 1 |
| TOR2A     | chr9  | 130494553/G//A      | synonymous    | 0 | 1 |
| ITIH5     | chr10 | 7683943/G//A        | synonymous    | 0 | 1 |
| AGBL2     | chr11 | 47701525/C//T       | synonymous    | 0 | 1 |
| SSTR1     | chr14 | 38679346/G//A       | nonsynonymous | 0 | 1 |
| UNC13C    | chr15 | 54435818/C//G       | nonsynonymous | 0 | 1 |
| CSK       | chr15 | 75091012/C//G       | synonymous    | 0 | 1 |
| ZNF232    | chr17 | 5009519/A//G        | nonsynonymous | 0 | 1 |
| CLEC10A   | chr17 | 6982153/A//G        | synonymous    | 0 | 1 |
| MRC2      | chr17 | 60751524/G//T       | nonsynonymous | 0 | 1 |
| ZNF844    | chr19 | 12187206/G//A       | nonsynonymous | 0 | 1 |
| NWD1      | chr19 | 16842067/A//G       | nonsynonymous | 0 | 1 |
| BAGE3     | chr21 | 11049596/C//T       | nonsynonymous | 0 | 1 |
| PI4KA     | chr22 | 21066824/C//A       | nonsynonymous | 0 | 1 |
| GTPBP6    | chrX  | 228217/C//T         | nonsynonymous | 0 | 1 |
| KCNE5     | chrX  | 108868228/G//A      | nonsynonymous | 0 | 1 |
| CXorf56   | chrX  | 118675352/G//T      | nonsynonymous | 0 | 1 |
| ABCD1     | chrX  | 152991032/G//A      | nonsynonymous | 0 | 1 |
| AGO1      | chr1  | 36367669/C//T       | nonsynonymous | 0 | 1 |
| OR2W3     | chr1  | 248058989/C//T      | nonsynonymous | 0 | 1 |
| KLHL30    | chr2  | 239049843/G//A      | nonsynonymous | 0 | 1 |
| ROBO2     | chr3  | 77611855/T//G       | synonymous    | 0 | 1 |
| U2SURP    | chr3  | 142735740/G//A      | nonsynonymous | 0 | 1 |
| VEPH1     | chr3  | 156978959/T//A      | nonsynonymous | 0 | 1 |
| PI4K2B    | chr4  | 25235844/A//G       | nonsynonymous | 0 | 1 |
| MAPK10    | chr4  | 86938432/G//A       | synonymous    | 0 | 1 |
| MMRN1     | chr4  | 90857387/C//G       | synonymous    | 0 | 1 |
| SLC6A3    | chr5  | 1403172/T//C        | synonymous    | 0 | 1 |
| APC       | chr5  | 112173668/CAA//C    | nonsynonymous | 0 | 1 |
| PPIC      | chr5  | 122364464/C//T      | synonymous    | 0 | 1 |
| PCDHGB5   | chr5  | 140779334/T//C      | nonsynonymous | 0 | 1 |
| KIF4B     | chr5  | 154393956/G//T      | nonsynonymous | 0 | 1 |
| NIPAL4    | chr5  | 156887257/C//T      | nonsynonymous | 0 | 1 |
| MXD3      | chr5  | 176738873/G//A      | synonymous    | 0 | 1 |
| ADAMTS2   | chr5  | 178699962/C//T      | nonsynonymous | 0 | 1 |
| MBOAT1    | chr6  | 20124776/G//A       | nonsynonymous | 0 | 1 |
| STK31     | chr7  | 23775208/A//G       | nonsynonymous | 0 | 1 |
| CA1       | chr8  | 86240910/A//G       | synonymous    | 0 | 1 |
| FAM120AOS | chr9  | 96214617/G//C       | synonymous    | 0 | 1 |
| PYROXD2   | chr10 | 100152753/A//G      | synonymous    | 0 | 1 |
| ACER3     | chr11 | 76726116/G//A       | nonsynonymous | 0 | 1 |
| ARHGAP20  | chr11 | 110501477/A//G      | nonsynonymous | 0 | 1 |
| RTL1      | chr14 | 101349773/G//A      | synonymous    | 0 | 1 |
| EXOC3L4   | chr14 | 103574772/G//A      | nonsynonymous | 0 | 1 |
| TDRD9     | chr14 | 104433138/G//A      | synonymous    | 0 | 1 |
| DHODH     | chr16 | 72057510/C//T       | nonsynonymous | 0 | 1 |
| ANKFY1    | chr17 | 4088189/G//T        | synonymous    | 0 | 1 |
| EPG5      | chr18 | 43440124/G//A       | synonymous    | 0 | 1 |
| ZNF30     | chr19 | 35435001/C//T       | synonymous    | 0 | 1 |
| ZNF772    | chr19 | 57985332/G//A       | synonymous    | 0 | 1 |
| NDUFAF5   | chr20 | 13797787/C//T       | synonymous    | 0 | 1 |

|          |       |                    |               |   |   |
|----------|-------|--------------------|---------------|---|---|
| RALGAPB  | chr20 | 37137768/C//A      | synonymous    | 0 | 1 |
| PCNT     | chr21 | 47744105/C//T      | synonymous    | 0 | 1 |
| MYO18B   | chr22 | 26164433/G//A      | nonsynonymous | 0 | 1 |
| CELA3A   | chr1  | 22333860/T//C      | synonymous    | 0 | 1 |
| FANCD2   | chr3  | 10122775/TTATTA//T | nonsynonymous | 0 | 1 |
| NBEAL2   | chr3  | 47042645/G//A      | nonsynonymous | 0 | 1 |
| DDX60L   | chr4  | 169292905/G//A     | nonsynonymous | 0 | 1 |
| BHMT     | chr5  | 78421907/A//G      | nonsynonymous | 0 | 1 |
| SKP1     | chr5  | 133509644/A//G     | nonsynonymous | 0 | 1 |
| NME5     | chr5  | 137464275/A//G     | synonymous    | 0 | 1 |
| GRIA1    | chr5  | 153026518/C//T     | nonsynonymous | 0 | 1 |
| PRPF4B   | chr6  | 4021638/C//A       | synonymous    | 0 | 1 |
| SLCO5A1  | chr8  | 70585189/T//C      | nonsynonymous | 0 | 1 |
| PLEC     | chr8  | 144999791/T//C     | nonsynonymous | 0 | 1 |
| PLAA     | chr9  | 26913896/G//A      | synonymous    | 0 | 1 |
|          | chr9  | 124062408/A//G     | synonymous    | 0 | 1 |
| MKI67    | chr10 | 129910533/T//C     | synonymous    | 0 | 1 |
| PHLDB1   | chr11 | 118516165/C//T     | synonymous    | 0 | 1 |
| KIRREL3  | chr11 | 126391239/C//T     | nonsynonymous | 0 | 1 |
| CACNA1C  | chr12 | 2714265/C//T       | synonymous    | 0 | 1 |
| SLITRK5  | chr13 | 88329425/G//A      | synonymous    | 0 | 1 |
| HECTD1   | chr14 | 31570023/A//G      | synonymous    | 0 | 1 |
| SAMD15   | chr14 | 77845345/C//T      | synonymous    | 0 | 1 |
| RYR3     | chr15 | 34040685/C//T      | nonsynonymous | 0 | 1 |
| SLC5A11  | chr16 | 24918033/A//G      | synonymous    | 0 | 1 |
| RCVRN    | chr17 | 9804370/G//A       | synonymous    | 0 | 1 |
| EPB41L3  | chr18 | 5410605/C//T       | nonsynonymous | 0 | 1 |
| ANKRD24  | chr19 | 4200118/T//C       | nonsynonymous | 0 | 1 |
| OR7D4    | chr19 | 9325369/C//T       | nonsynonymous | 0 | 1 |
| ZNF101   | chr19 | 19790270/C//T      | nonsynonymous | 0 | 1 |
| ZNF536   | chr19 | 31039694/G//A      | synonymous    | 0 | 1 |
| PEG3     | chr19 | 57335875/C//T      | nonsynonymous | 0 | 1 |
| AGRN     | chr1  | 981871/C//T        | synonymous    | 1 | 0 |
| B3GALT6  | chr1  | 1168066/G//A       | synonymous    | 1 | 0 |
| B3GALT6  | chr1  | 1168074/T//C       | nonsynonymous | 1 | 0 |
| VWA1     | chr1  | 1374475/C//T       | nonsynonymous | 1 | 0 |
| ATAD3C   | chr1  | 1396281/G//A       | nonsynonymous | 1 | 0 |
| SLC35E2B | chr1  | 1602978/G//A       | nonsynonymous | 1 | 0 |
| AJAP1    | chr1  | 4832475/C//T       | synonymous    | 1 | 0 |
| CA6      | chr1  | 9017227/G//A       | nonsynonymous | 1 | 0 |
| H6PD     | chr1  | 9307049/C//T       | nonsynonymous | 1 | 0 |
| CLSTN1   | chr1  | 9801240/C//T       | synonymous    | 1 | 0 |
| DISP3    | chr1  | 11579424/T//C      | synonymous    | 1 | 0 |
| MAD2L2   | chr1  | 11735211/C//T      | synonymous    | 1 | 0 |
| DNAJC16  | chr1  | 15870904/T//C      | synonymous    | 1 | 0 |
| PADI1    | chr1  | 17550162/G//A      | nonsynonymous | 1 | 0 |
| NBPF3    | chr1  | 21799981/G//A      | synonymous    | 1 | 0 |
| CELA3B   | chr1  | 22304903/G//A      | nonsynonymous | 1 | 0 |
| EPHA8    | chr1  | 22922613/G//A      | nonsynonymous | 1 | 0 |
| AUNIP    | chr1  | 26163988/CCTTT//C  | nonsynonymous | 1 | 0 |
|          | chr1  | 26872423/G//A      | synonymous    | 1 | 0 |
| GPATCH3  | chr1  | 27224193/T//C      | nonsynonymous | 1 | 0 |
| AHDC1    | chr1  | 27874822/G//A      | nonsynonymous | 1 | 0 |
| COL16A1  | chr1  | 32122666/C//T      | nonsynonymous | 1 | 0 |
| RBBP4    | chr1  | 33150106/A//G      | synonymous    | 1 | 0 |
| ZSCAN20  | chr1  | 33945009/C//T      | synonymous    | 1 | 0 |
| CSMD2    | chr1  | 34401390/G//A      | nonsynonymous | 1 | 0 |
| ZMYM1    | chr1  | 35578622/T//C      | synonymous    | 1 | 0 |
| SH3D21   | chr1  | 36785375/G//A      | nonsynonymous | 1 | 0 |
| MACF1    | chr1  | 39903506/C//T      | nonsynonymous | 1 | 0 |
| KCNQ4    | chr1  | 41289794/G//A      | nonsynonymous | 1 | 0 |
| HIVEP3   | chr1  | 42046399/T//A      | nonsynonymous | 1 | 0 |
| ZNF691   | chr1  | 43317082/G//A      | synonymous    | 1 | 0 |
| MPL      | chr1  | 43812266/C//T      | synonymous    | 1 | 0 |
| C1orf228 | chr1  | 45190334/G//A      | synonymous    | 1 | 0 |
| IPP      | chr1  | 46165795/C//T      | nonsynonymous | 1 | 0 |
| POMGNT1  | chr1  | 46657790/T//C      | nonsynonymous | 1 | 0 |
| RAD54L   | chr1  | 46743519/C//T      | nonsynonymous | 1 | 0 |
| FAAH     | chr1  | 46872016/G//A      | synonymous    | 1 | 0 |
| DMRTA2   | chr1  | 50887031/C//T      | nonsynonymous | 1 | 0 |



|           |      |                   |               |   |   |
|-----------|------|-------------------|---------------|---|---|
| CC2D1B    | chr1 | 52823496/A//G     | synonymous    | 1 | 0 |
| SLC1A7    | chr1 | 53558467/C//T     | synonymous    | 1 | 0 |
| DIO1      | chr1 | 54359956/G//A     | nonsynonymous | 1 | 0 |
| L1TD1     | chr1 | 62675694/A//G     | synonymous    | 1 | 0 |
| DOCK7     | chr1 | 62941773/TAG//T   | nonsynonymous | 1 | 0 |
| LRRC7     | chr1 | 70505050/C//T     | synonymous    | 1 | 0 |
| ANKRD13C  | chr1 | 70781186/C//T     | nonsynonymous | 1 | 0 |
| CLCA2     | chr1 | 86921118/G//T     | nonsynonymous | 1 | 0 |
| BCAR3     | chr1 | 94048000/AAGG//A  | nonsynonymous | 1 | 0 |
| DPYD      | chr1 | 98293695/G//A     | nonsynonymous | 1 | 0 |
| VCAM1     | chr1 | 101198237/CA//C   | nonsynonymous | 1 | 0 |
| COL11A1   | chr1 | 103444449/A//G    | synonymous    | 1 | 0 |
| AMPD2     | chr1 | 110170884/G//A    | synonymous    | 1 | 0 |
| KCNC4     | chr1 | 110766299/C//T    | synonymous    | 1 | 0 |
| IGSF3     | chr1 | 117208901/C//T    | synonymous    | 1 | 0 |
| PTGFRN    | chr1 | 117527334/G//A    | nonsynonymous | 1 | 0 |
| PDE4DIP   | chr1 | 144866673/G//A    | nonsynonymous | 1 | 0 |
| GJA5      | chr1 | 147231087/G//A    | nonsynonymous | 1 | 0 |
| FCGR1A    | chr1 | 149760138/G//A    | nonsynonymous | 1 | 0 |
| CTSK      | chr1 | 150778432/T//G    | nonsynonymous | 1 | 0 |
| PI4KB     | chr1 | 151266968/C//T    | nonsynonymous | 1 | 0 |
| CELF3     | chr1 | 151680350/C//T    | nonsynonymous | 1 | 0 |
| FLG       | chr1 | 152278610/A//T    | nonsynonymous | 1 | 0 |
| FLG       | chr1 | 152281795/C//T    | nonsynonymous | 1 | 0 |
| S100A16   | chr1 | 153580156/G//A    | nonsynonymous | 1 | 0 |
| ADAR      | chr1 | 154562843/G//T    | synonymous    | 1 | 0 |
| ASH1L     | chr1 | 155330147/G//A    | nonsynonymous | 1 | 0 |
| GON4L     | chr1 | 155721649/C//T    | nonsynonymous | 1 | 0 |
| SEMA4A    | chr1 | 156130310/G//A    | synonymous    | 1 | 0 |
| CD1D      | chr1 | 158152697/C//A    | nonsynonymous | 1 | 0 |
| OR6K3     | chr1 | 158687028/T//C    | nonsynonymous | 1 | 0 |
| TADA1     | chr1 | 166829551/C//T    | synonymous    | 1 | 0 |
| ADCY10    | chr1 | 167791382/AAG//A  | synonymous    | 1 | 0 |
| F5        | chr1 | 169511621/C//T    | nonsynonymous | 1 | 0 |
| PRRC2C    | chr1 | 171501770/C//T    | nonsynonymous | 1 | 0 |
| SUCO      | chr1 | 172558328/CTGT//C | nonsynonymous | 1 | 0 |
| ASTN1     | chr1 | 176913089/G//A    | nonsynonymous | 1 | 0 |
| LAMC2     | chr1 | 183204870/G//A    | synonymous    | 1 | 0 |
| APOBEC4   | chr1 | 183616825/TTTC//T | nonsynonymous | 1 | 0 |
| ASPM      | chr1 | 197060089/T//A    | nonsynonymous | 1 | 0 |
| SOX13     | chr1 | 204095006/A//G    | nonsynonymous | 1 | 0 |
| GOLT1A    | chr1 | 204183081/A//G    | synonymous    | 1 | 0 |
| CNTN2     | chr1 | 205034377/G//A    | nonsynonymous | 1 | 0 |
| ELK4      | chr1 | 205592918/C//T    | synonymous    | 1 | 0 |
| AVPR1B    | chr1 | 206224329/C//T    | synonymous    | 1 | 0 |
| RASSF5    | chr1 | 206757860/A//T    | nonsynonymous | 1 | 0 |
| C4BPA     | chr1 | 207288791/G//A    | nonsynonymous | 1 | 0 |
| IRF6      | chr1 | 209961873/G//A    | synonymous    | 1 | 0 |
| NSL1      | chr1 | 212911820/TTTC//T | nonsynonymous | 1 | 0 |
|           | chr1 | 216348525/G//A    | synonymous    | 1 | 0 |
| CAPN2     | chr1 | 223951883/C//T    | nonsynonymous | 1 | 0 |
| RAB4A     | chr1 | 229433239/T//A    | nonsynonymous | 1 | 0 |
| LYST      | chr1 | 235922762/T//G    | synonymous    | 1 | 0 |
| ACTN2     | chr1 | 236914816/C//T    | nonsynonymous | 1 | 0 |
| ZP4       | chr1 | 238050848/A//T    | nonsynonymous | 1 | 0 |
| RGS7      | chr1 | 241100003/T//A    | nonsynonymous | 1 | 0 |
| EXO1      | chr1 | 242042551/G//T    | nonsynonymous | 1 | 0 |
| KIF26B    | chr1 | 245530163/G//A    | nonsynonymous | 1 | 0 |
| ZNF124    | chr1 | 247320049/C//T    | nonsynonymous | 1 | 0 |
| ZNF496    | chr1 | 247463849/C//T    | nonsynonymous | 1 | 0 |
| OR6F1     | chr1 | 247875316/C//A    | nonsynonymous | 1 | 0 |
| SH3BP5L   | chr1 | 249106231/G//A    | synonymous    | 1 | 0 |
| PXDN      | chr2 | 1647234/G//A      | synonymous    | 1 | 0 |
|           | chr2 | 1796046/C//T      | synonymous    | 1 | 0 |
| KIDINS220 | chr2 | 8871451/T//C      | nonsynonymous | 1 | 0 |
| ASAP2     | chr2 | 9498960/T//C      | nonsynonymous | 1 | 0 |
| YWHAQ     | chr2 | 9770391/C//T      | nonsynonymous | 1 | 0 |
| WDR35     | chr2 | 20160311/T//G     | synonymous    | 1 | 0 |
| PUM2      | chr2 | 20455850/T//C     | nonsynonymous | 1 | 0 |
| IFT172    | chr2 | 27699557/T//C     | synonymous    | 1 | 0 |

|               |      |                      |               |   |   |
|---------------|------|----------------------|---------------|---|---|
| PLB1          | chr2 | 28820884/C//T        | synonymous    | 1 | 0 |
| EHD3          | chr2 | 31457713/A//G        | nonsynonymous | 1 | 0 |
| BIRC6         | chr2 | 32832696/C//T        | nonsynonymous | 1 | 0 |
| RASGRP3       | chr2 | 33780611/T//C        | nonsynonymous | 1 | 0 |
| THADA         | chr2 | 43520054/G//A        | synonymous    | 1 | 0 |
| STON1-GTF2A1L | chr2 | 48848415/T//C        | nonsynonymous | 1 | 0 |
| NRXN1         | chr2 | 50724736/A//C        | nonsynonymous | 1 | 0 |
| TSPYL6        | chr2 | 54482768/G//A        | nonsynonymous | 1 | 0 |
| TSPYL6        | chr2 | 54483379/C//T        | synonymous    | 1 | 0 |
| SPTBN1        | chr2 | 54856197/GTTC//G     | nonsynonymous | 1 | 0 |
| SPTBN1        | chr2 | 54883115/G//A        | nonsynonymous | 1 | 0 |
| EML6          | chr2 | 55181179/C//T        | nonsynonymous | 1 | 0 |
| FAM161A       | chr2 | 62067586/ACT//A      | nonsynonymous | 1 | 0 |
| ETAA1         | chr2 | 67630506/A//T        | nonsynonymous | 1 | 0 |
| CLEC4F        | chr2 | 71044114/C//T        | synonymous    | 1 | 0 |
| VAX2          | chr2 | 71160418/G//A        | synonymous    | 1 | 0 |
| SFXN5         | chr2 | 73298860/C//T        | synonymous    | 1 | 0 |
| TET3          | chr2 | 74274855/G//A        | nonsynonymous | 1 | 0 |
| TET3          | chr2 | 74320727/G//A        | synonymous    | 1 | 0 |
| LOXL3         | chr2 | 74776642/C//T        | synonymous    | 1 | 0 |
| LRRTM4        | chr2 | 77746710/A//C        | nonsynonymous | 1 | 0 |
| POLR1A        | chr2 | 86254541/AGCT//A     | synonymous    | 1 | 0 |
| RNF103        | chr2 | 86831237/C//A        | nonsynonymous | 1 | 0 |
| RMND5A        | chr2 | 86998712/A//T        | nonsynonymous | 1 | 0 |
| GPAT2         | chr2 | 96688935/G//A        | nonsynonymous | 1 | 0 |
| SLC9A2        | chr2 | 103324702/GAAGA//G   | nonsynonymous | 1 | 0 |
| SLC5A7        | chr2 | 108604648/G//A       | nonsynonymous | 1 | 0 |
| GCC2          | chr2 | 109124124/CTATT//C   | synonymous    | 1 | 0 |
| RANBP2        | chr2 | 109383727/T//C       | synonymous    | 1 | 0 |
| CKAP2L        | chr2 | 113522198/T//G       | synonymous    | 1 | 0 |
| INSIG2        | chr2 | 118854234/G//T       | synonymous    | 1 | 0 |
| INSIG2        | chr2 | 118854301/C//T       | nonsynonymous | 1 | 0 |
| STEAP3        | chr2 | 120003349/C//T       | nonsynonymous | 1 | 0 |
| CFAP221       | chr2 | 120362373/G//A       | synonymous    | 1 | 0 |
| MYO7B         | chr2 | 128347805/G//T       | nonsynonymous | 1 | 0 |
| LIMS2         | chr2 | 128397861/A//G       | synonymous    | 1 | 0 |
| WDR33         | chr2 | 128466334/C//T       | nonsynonymous | 1 | 0 |
| RAB6C         | chr2 | 130738148/G//A       | nonsynonymous | 1 | 0 |
| GPR39         | chr2 | 133402692/TG//T      | nonsynonymous | 1 | 0 |
| ZRANB3        | chr2 | 136103170/T//G       | nonsynonymous | 1 | 0 |
| LRP1B         | chr2 | 141283486/C//T       | synonymous    | 1 | 0 |
| MBD5          | chr2 | 149247747/ACTGTGG//A | nonsynonymous | 1 | 0 |
| GALNT13       | chr2 | 154996845/T//C       | synonymous    | 1 | 0 |
| KCNJ3         | chr2 | 155711572/G//C       | nonsynonymous | 1 | 0 |
| ACVR1C        | chr2 | 158406720/C//T       | nonsynonymous | 1 | 0 |
| WDSUB1        | chr2 | 160105008/C//T       | nonsynonymous | 1 | 0 |
| MARCH7        | chr2 | 160605043/C//G       | synonymous    | 1 | 0 |
| TANK          | chr2 | 162091890/C//T       | nonsynonymous | 1 | 0 |
| TBR1          | chr2 | 162279931/G//A       | synonymous    | 1 | 0 |
| SCN2A         | chr2 | 166237705/G//A       | nonsynonymous | 1 | 0 |
| SCN1A         | chr2 | 166894292/G//A       | synonymous    | 1 | 0 |
| SCN7A         | chr2 | 167284444/G//A       | nonsynonymous | 1 | 0 |
| XIRP2         | chr2 | 168067299/G//A       | nonsynonymous | 1 | 0 |
| STK39         | chr2 | 168997201/G//A       | synonymous    | 1 | 0 |
| KLHL41        | chr2 | 170377509/CAT//C     | nonsynonymous | 1 | 0 |
| WIPF1         | chr2 | 175436410/G//A       | nonsynonymous | 1 | 0 |
| CHRNA1        | chr2 | 175614840/A//G       | nonsynonymous | 1 | 0 |
| HOXD9         | chr2 | 176987598/C//T       | synonymous    | 1 | 0 |
| HOXD3         | chr2 | 177036623/C//T       | nonsynonymous | 1 | 0 |
| TTN           | chr2 | 179404558/A//G       | nonsynonymous | 1 | 0 |
| TTN           | chr2 | 179425019/C//T       | nonsynonymous | 1 | 0 |
| TTN           | chr2 | 179426155/G//A       | nonsynonymous | 1 | 0 |
| TTN           | chr2 | 179427827/C//T       | nonsynonymous | 1 | 0 |
| TTN           | chr2 | 179481856/C//T       | nonsynonymous | 1 | 0 |
| TTN           | chr2 | 179495927/C//T       | synonymous    | 1 | 0 |
| TTN           | chr2 | 179593733/G//A       | synonymous    | 1 | 0 |
| TTN           | chr2 | 179658219/G//T       | nonsynonymous | 1 | 0 |
| DNAJC10       | chr2 | 183623615/A//G       | synonymous    | 1 | 0 |
| SDPR          | chr2 | 192701125/T//C       | nonsynonymous | 1 | 0 |
| SLC39A10      | chr2 | 196581534/G//A       | nonsynonymous | 1 | 0 |

|             |      |                   |               |   |   |
|-------------|------|-------------------|---------------|---|---|
| DNAH7       | chr2 | 196729464/ATTG//A | nonsynonymous | 1 | 0 |
| C2orf69     | chr2 | 200776332/T//C    | synonymous    | 1 | 0 |
| SPATS2L     | chr2 | 201342423/C//G    | nonsynonymous | 1 | 0 |
| NBEAL1      | chr2 | 204075830/G//T    | nonsynonymous | 1 | 0 |
|             | chr2 | 206608305/G//A    | synonymous    | 1 | 0 |
| MDH1B       | chr2 | 207621736/G//A    | nonsynonymous | 1 | 0 |
| PLEKHM3     | chr2 | 208795674/G//A    | nonsynonymous | 1 | 0 |
| CRYGB       | chr2 | 209007370/A//G    | synonymous    | 1 | 0 |
| PIKFYVE     | chr2 | 209191033/T//A    | nonsynonymous | 1 | 0 |
| ERBB4       | chr2 | 212578340/C//G    | nonsynonymous | 1 | 0 |
| XRCC5       | chr2 | 216986893/G//A    | synonymous    | 1 | 0 |
| TNS1        | chr2 | 218683225/G//A    | nonsynonymous | 1 | 0 |
| NYAP2       | chr2 | 226447618/C//T    | synonymous    | 1 | 0 |
| COL4A3      | chr2 | 228167820/G//C    | nonsynonymous | 1 | 0 |
| MFF         | chr2 | 228212087/G//C    | nonsynonymous | 1 | 0 |
| USP40       | chr2 | 234465631/C//T    | nonsynonymous | 1 | 0 |
| ACKR3       | chr2 | 237489345/G//A    | synonymous    | 1 | 0 |
| ESPNL       | chr2 | 239036341/C//A    | nonsynonymous | 1 | 0 |
| SNED1       | chr2 | 241988107/C//T    | synonymous    | 1 | 0 |
| HDLBP       | chr2 | 242186201/G//A    | nonsynonymous | 1 | 0 |
| SSUH2       | chr3 | 8671412/C//A      | nonsynonymous | 1 | 0 |
| SRGAP3      | chr3 | 9146411/C//T      | nonsynonymous | 1 | 0 |
| CIDEC       | chr3 | 9908698/G//A      | synonymous    | 1 | 0 |
| FANCD2      | chr3 | 10084326/A//C     | synonymous    | 1 | 0 |
| TOP2B       | chr3 | 25677436/C//A     | nonsynonymous | 1 | 0 |
| DCLK3       | chr3 | 36779904/G//A     | nonsynonymous | 1 | 0 |
| ULK4        | chr3 | 41973348/T//A     | nonsynonymous | 1 | 0 |
| TGM4        | chr3 | 44932115/T//G     | nonsynonymous | 1 | 0 |
| CCR3        | chr3 | 46306741/C//A     | nonsynonymous | 1 | 0 |
| ALS2CL      | chr3 | 46725332/C//T     | synonymous    | 1 | 0 |
| SCAP        | chr3 | 47459927/C//T     | nonsynonymous | 1 | 0 |
| ELP6        | chr3 | 47539884/C//T     | synonymous    | 1 | 0 |
| CDHR4       | chr3 | 49833072/GA//G    | nonsynonymous | 1 | 0 |
| MST1R       | chr3 | 49924952/G//A     | nonsynonymous | 1 | 0 |
| RBM6        | chr3 | 50005308/A//G     | synonymous    | 1 | 0 |
| RBM6        | chr3 | 50005421/G//A     | nonsynonymous | 1 | 0 |
| WDR82       | chr3 | 52295490/A//G     | nonsynonymous | 1 | 0 |
| FEZF2       | chr3 | 62355871/C//T     | nonsynonymous | 1 | 0 |
| CNTN3       | chr3 | 74350837/G//A     | nonsynonymous | 1 | 0 |
| ROBO1       | chr3 | 78706415/C//T     | nonsynonymous | 1 | 0 |
| POU1F1      | chr3 | 87313475/CTT//C   | nonsynonymous | 1 | 0 |
| TRAT1       | chr3 | 108568047/A//C    | nonsynonymous | 1 | 0 |
| DRD3        | chr3 | 113850098/C//T    | synonymous    | 1 | 0 |
| NR1I2       | chr3 | 119536019/C//T    | nonsynonymous | 1 | 0 |
| GPR156      | chr3 | 119887219/T//C    | nonsynonymous | 1 | 0 |
| PDIA5       | chr3 | 122842941/C//T    | nonsynonymous | 1 | 0 |
| KALRN       | chr3 | 124385375/G//A    | nonsynonymous | 1 | 0 |
| OSBPL11     | chr3 | 125249357/T//G    | synonymous    | 1 | 0 |
| MCM2        | chr3 | 127339589/C//T    | nonsynonymous | 1 | 0 |
| RHO         | chr3 | 129249765/C//T    | synonymous    | 1 | 0 |
| ACAD11      | chr3 | 132294684/G//A    | nonsynonymous | 1 | 0 |
| ZIC1        | chr3 | 147128453/G//A    | nonsynonymous | 1 | 0 |
| HLTF        | chr3 | 148750058/G//A    | synonymous    | 1 | 0 |
| PFN2        | chr3 | 149683983/C//T    | synonymous    | 1 | 0 |
| P2RY14      | chr3 | 150931793/G//A    | synonymous    | 1 | 0 |
| IQCJ-SCHIP1 | chr3 | 159583963/TGA//T  | nonsynonymous | 1 | 0 |
| NLGN1       | chr3 | 173997257/A//G    | nonsynonymous | 1 | 0 |
| CCDC39      | chr3 | 180332761/G//T    | nonsynonymous | 1 | 0 |
| YEATS2      | chr3 | 183524790/CAAG//C | nonsynonymous | 1 | 0 |
| DGKG        | chr3 | 185997644/T//C    | nonsynonymous | 1 | 0 |
| CLDN1       | chr3 | 190026113/T//C    | nonsynonymous | 1 | 0 |
| GMNC        | chr3 | 190573409/G//A    | nonsynonymous | 1 | 0 |
|             | chr3 | 196746640/A//T    | synonymous    | 1 | 0 |
|             | chr3 | 196910748/G//A    | synonymous    | 1 | 0 |
| FYTTD1      | chr3 | 197476735/G//A    | synonymous    | 1 | 0 |
| IQCG        | chr3 | 197665551/G//A    | nonsynonymous | 1 | 0 |
| POLN        | chr4 | 2200401/C//T      | nonsynonymous | 1 | 0 |
| NSG1        | chr4 | 4393312/G//T      | nonsynonymous | 1 | 0 |
| HTRA3       | chr4 | 8293178/G//A      | nonsynonymous | 1 | 0 |
| CPZ         | chr4 | 8603208/G//A      | synonymous    | 1 | 0 |

|           |      |                |               |   |   |
|-----------|------|----------------|---------------|---|---|
| BOD1L1    | chr4 | 13604564/C//T  | synonymous    | 1 | 0 |
| CC2D2A    | chr4 | 15589532/A//G  | nonsynonymous | 1 | 0 |
| LAP3      | chr4 | 17585107/G//A  | synonymous    | 1 | 0 |
| FAM184B   | chr4 | 17707453/T//C  | synonymous    | 1 | 0 |
| PI4K2B    | chr4 | 25256828/G//A  | nonsynonymous | 1 | 0 |
| LIMCH1    | chr4 | 41615555/C//T  | nonsynonymous | 1 | 0 |
| PHOX2B    | chr4 | 41749534/C//T  | synonymous    | 1 | 0 |
| TXK       | chr4 | 48091781/G//A  | nonsynonymous | 1 | 0 |
| LRRC66    | chr4 | 52861404/G//A  | nonsynonymous | 1 | 0 |
| TMPRSS11A | chr4 | 68777063/G//A  | synonymous    | 1 | 0 |
| CSN2      | chr4 | 70823054/T//G  | nonsynonymous | 1 | 0 |
| CABS1     | chr4 | 71201008/C//T  | synonymous    | 1 | 0 |
| THAP9     | chr4 | 83829088/C//T  | nonsynonymous | 1 | 0 |
| WDFY3     | chr4 | 85738542/T//G  | synonymous    | 1 | 0 |
| ABCG2     | chr4 | 89034639/A//T  | nonsynonymous | 1 | 0 |
| TBCK      | chr4 | 107154789/A//T | nonsynonymous | 1 | 0 |
| KIAA1109  | chr4 | 123267786/G//T | nonsynonymous | 1 | 0 |
| ANKRD50   | chr4 | 125590284/C//T | nonsynonymous | 1 | 0 |
| SMAD1     | chr4 | 146479027/C//T | synonymous    | 1 | 0 |
| DCLK2     | chr4 | 151160952/C//T | nonsynonymous | 1 | 0 |
| FGB       | chr4 | 155487066/G//A | nonsynonymous | 1 | 0 |
| SPOCK3    | chr4 | 167921589/G//T | nonsynonymous | 1 | 0 |
| ACSL1     | chr4 | 185724511/G//A | nonsynonymous | 1 | 0 |
| FAM149A   | chr4 | 187088380/G//A | nonsynonymous | 1 | 0 |
| TRIML2    | chr4 | 189012873/C//T | nonsynonymous | 1 | 0 |
| FRG1      | chr4 | 190883087/G//T | nonsynonymous | 1 | 0 |
| LRRC14B   | chr5 | 192284/G//A    | nonsynonymous | 1 | 0 |
| SEMA5A    | chr5 | 9119183/G//A   | nonsynonymous | 1 | 0 |
| ANKRD33B  | chr5 | 10618520/G//A  | nonsynonymous | 1 | 0 |
| CDH10     | chr5 | 24498555/A//T  | nonsynonymous | 1 | 0 |
| ZFR       | chr5 | 32444742/A//G  | nonsynonymous | 1 | 0 |
| ITGA2     | chr5 | 52386383/C//T  | nonsynonymous | 1 | 0 |
| MAP3K1    | chr5 | 56178237/A//T  | synonymous    | 1 | 0 |
| GPBP1     | chr5 | 56542967/A//G  | synonymous    | 1 | 0 |
| MARVELD2  | chr5 | 68715229/G//T  | nonsynonymous | 1 | 0 |
| NAIP      | chr5 | 70308603/G//A  | nonsynonymous | 1 | 0 |
| MCCC2     | chr5 | 70895518/G//A  | nonsynonymous | 1 | 0 |
| PPIP5K2   | chr5 | 102494271/T//A | nonsynonymous | 1 | 0 |
| CXCL14    | chr5 | 134914483/C//T | nonsynonymous | 1 | 0 |
| SPATA24   | chr5 | 138737518/G//T | synonymous    | 1 | 0 |
| PCDHA4    | chr5 | 140188813/C//T | nonsynonymous | 1 | 0 |
| TAF7      | chr5 | 140699293/C//T | nonsynonymous | 1 | 0 |
| ABLIM3    | chr5 | 148620265/T//A | nonsynonymous | 1 | 0 |
| AFAP1L1   | chr5 | 148709328/G//A | nonsynonymous | 1 | 0 |
| SLC36A1   | chr5 | 150858891/T//C | nonsynonymous | 1 | 0 |
| FAT2      | chr5 | 150923897/T//C | nonsynonymous | 1 | 0 |
| GEMIN5    | chr5 | 154296712/G//C | nonsynonymous | 1 | 0 |
| KIF4B     | chr5 | 154394866/T//C | nonsynonymous | 1 | 0 |
| ADAM19    | chr5 | 156908868/A//G | synonymous    | 1 | 0 |
| ADAM19    | chr5 | 156915406/G//T | nonsynonymous | 1 | 0 |
| SLIT3     | chr5 | 168216615/T//G | synonymous    | 1 | 0 |
| LCP2      | chr5 | 169675759/C//T | nonsynonymous | 1 | 0 |
| RANBP17   | chr5 | 170610211/A//T | nonsynonymous | 1 | 0 |
| SH3PXD2B  | chr5 | 171765654/G//A | nonsynonymous | 1 | 0 |
| SLC22A23  | chr6 | 3273552/G//A   | nonsynonymous | 1 | 0 |
| FARS2     | chr6 | 5404837/G//A   | synonymous    | 1 | 0 |
| FARS2     | chr6 | 5771583/C//T   | nonsynonymous | 1 | 0 |
| NEDD9     | chr6 | 11213645/G//T  | nonsynonymous | 1 | 0 |
| NUP153    | chr6 | 17632936/A//G  | synonymous    | 1 | 0 |
| CDKAL1    | chr6 | 20548906/C//T  | nonsynonymous | 1 | 0 |
| NRSN1     | chr6 | 24146260/C//T  | synonymous    | 1 | 0 |
| GPLD1     | chr6 | 24429141/A//G  | synonymous    | 1 | 0 |
| CARMIL1   | chr6 | 25551146/T//G  | synonymous    | 1 | 0 |
| HIST1H2BA | chr6 | 25727357/G//A  | nonsynonymous | 1 | 0 |
| SLC17A2   | chr6 | 25914865/T//A  | nonsynonymous | 1 | 0 |
| HIST1H2BH | chr6 | 26252186/T//A  | nonsynonymous | 1 | 0 |
| ZSCAN26   | chr6 | 28239934/C//G  | nonsynonymous | 1 | 0 |
| GABBR1    | chr6 | 29574685/G//A  | nonsynonymous | 1 | 0 |
| GABBR1    | chr6 | 29588948/G//A  | nonsynonymous | 1 | 0 |
| ZFP57     | chr6 | 29643227/C//T  | synonymous    | 1 | 0 |

|              |      |                  |               |   |   |
|--------------|------|------------------|---------------|---|---|
| CFB          | chr6 | 31915247/C//T    | nonsynonymous | 1 | 0 |
| PHF1         | chr6 | 33382066/A//T    | nonsynonymous | 1 | 0 |
| ITPR3        | chr6 | 33626528/ACT//A  | nonsynonymous | 1 | 0 |
| UHRF1BP1     | chr6 | 34823441/C//T    | nonsynonymous | 1 | 0 |
| ANKS1A       | chr6 | 34952864/G//A    | nonsynonymous | 1 | 0 |
| TCP11        | chr6 | 35086154/G//A    | synonymous    | 1 | 0 |
| ZNF76        | chr6 | 35255628/C//T    | synonymous    | 1 | 0 |
| BRPF3        | chr6 | 36198206/G//A    | synonymous    | 1 | 0 |
| DNAH8        | chr6 | 38791392/T//C    | nonsynonymous | 1 | 0 |
| UNC5CL       | chr6 | 41001860/T//C    | nonsynonymous | 1 | 0 |
| UBR2         | chr6 | 42637910/C//T    | nonsynonymous | 1 | 0 |
| CUL7         | chr6 | 43010919/C//T    | nonsynonymous | 1 | 0 |
| CUL7         | chr6 | 43016165/C//T    | synonymous    | 1 | 0 |
| POLH         | chr6 | 43581581/A//C    | nonsynonymous | 1 | 0 |
| MUT          | chr6 | 49425735/G//A    | nonsynonymous | 1 | 0 |
| PKHD1        | chr6 | 51613426/G//A    | synonymous    | 1 | 0 |
| GSTA4        | chr6 | 52859023/G//A    | nonsynonymous | 1 | 0 |
| TINAG        | chr6 | 54185435/C//T    | synonymous    | 1 | 0 |
| BMP5         | chr6 | 55639039/G//A    | nonsynonymous | 1 | 0 |
| RIMS1        | chr6 | 72945331/C//T    | nonsynonymous | 1 | 0 |
| CD109        | chr6 | 74517822/A//T    | nonsynonymous | 1 | 0 |
| PGM3         | chr6 | 83889614/T//C    | nonsynonymous | 1 | 0 |
| CEP162       | chr6 | 84904743/A//G    | nonsynonymous | 1 | 0 |
| LOC101929057 | chr6 | 90397923/A//G    | synonymous    | 1 | 0 |
| MDN1         | chr6 | 90432740/A//G    | synonymous    | 1 | 0 |
| MDN1         | chr6 | 90466033/A//C    | nonsynonymous | 1 | 0 |
| MAP3K7       | chr6 | 91261906/T//C    | synonymous    | 1 | 0 |
| MCHR2        | chr6 | 100403974/T//C   | nonsynonymous | 1 | 0 |
| SCML4        | chr6 | 108067978/G//A   | synonymous    | 1 | 0 |
| ARMC2        | chr6 | 109274324/G//A   | nonsynonymous | 1 | 0 |
| REV3L        | chr6 | 111654417/C//T   | nonsynonymous | 1 | 0 |
| HS3ST5       | chr6 | 114378576/G//A   | nonsynonymous | 1 | 0 |
| RSPH4A       | chr6 | 116938163/A//C   | nonsynonymous | 1 | 0 |
| RNF217       | chr6 | 125379190/C//T   | nonsynonymous | 1 | 0 |
| NCOA7        | chr6 | 126236555/G//T   | nonsynonymous | 1 | 0 |
| MTFR2        | chr6 | 136560720/C//T   | synonymous    | 1 | 0 |
| PCMT1        | chr6 | 150123393/G//A   | nonsynonymous | 1 | 0 |
| SYNE1        | chr6 | 152809633/TTC//T | nonsynonymous | 1 | 0 |
| OPRM1        | chr6 | 154412543/G//A   | nonsynonymous | 1 | 0 |
| TFB1M        | chr6 | 155606337/T//C   | synonymous    | 1 | 0 |
| ARID1B       | chr6 | 157511253/C//T   | synonymous    | 1 | 0 |
| SOD2         | chr6 | 160105957/C//G   | nonsynonymous | 1 | 0 |
| IGF2R        | chr6 | 160445699/G//A   | synonymous    | 1 | 0 |
| RPS6KA2      | chr6 | 166844003/G//A   | nonsynonymous | 1 | 0 |
| THBS2        | chr6 | 169634937/G//A   | nonsynonymous | 1 | 0 |
| DNAAF5       | chr7 | 810139/C//T      | synonymous    | 1 | 0 |
| MAD1L1       | chr7 | 1997278/G//A     | nonsynonymous | 1 | 0 |
|              | chr7 | 2552899/A//G     | synonymous    | 1 | 0 |
| SDK1         | chr7 | 4014070/C//T     | synonymous    | 1 | 0 |
| TNRC18       | chr7 | 5352793/T//C     | nonsynonymous | 1 | 0 |
| CCZ1B        | chr7 | 6862938/G//A     | synonymous    | 1 | 0 |
| THSD7A       | chr7 | 11521477/C//A    | nonsynonymous | 1 | 0 |
| BZW2         | chr7 | 16705063/A//T    | synonymous    | 1 | 0 |
| HDAC9        | chr7 | 18767220/G//A    | synonymous    | 1 | 0 |
| HOXA13       | chr7 | 27237694/A//G    | synonymous    | 1 | 0 |
| AMPH         | chr7 | 38424397/CCTT//C | synonymous    | 1 | 0 |
| HECW1        | chr7 | 43484439/G//A    | synonymous    | 1 | 0 |
| HECW1        | chr7 | 43484745/C//T    | synonymous    | 1 | 0 |
| NACAD        | chr7 | 45120841/G//A    | nonsynonymous | 1 | 0 |
| ABCA13       | chr7 | 48315537/A//T    | nonsynonymous | 1 | 0 |
| ABCA13       | chr7 | 48315623/A//C    | nonsynonymous | 1 | 0 |
| ZPBP         | chr7 | 50097705/C//A    | nonsynonymous | 1 | 0 |
| C7orf72      | chr7 | 50198670/C//T    | nonsynonymous | 1 | 0 |
| GRB10        | chr7 | 50671770/G//T    | nonsynonymous | 1 | 0 |
| PHKG1        | chr7 | 56155352/C//T    | synonymous    | 1 | 0 |
| ZNF680       | chr7 | 63982619/A//T    | nonsynonymous | 1 | 0 |
| ZNF273       | chr7 | 64388485/A//T    | nonsynonymous | 1 | 0 |
| AUTS2        | chr7 | 70255623/C//T    | nonsynonymous | 1 | 0 |
| SSC4D        | chr7 | 76019569/C//T    | nonsynonymous | 1 | 0 |
| UPK3B        | chr7 | 76144547/G//T    | synonymous    | 1 | 0 |

|            |      |                 |               |   |   |
|------------|------|-----------------|---------------|---|---|
| RSBN1L     | chr7 | 77408061/A/G    | nonsynonymous | 1 | 0 |
| KIAA1324L  | chr7 | 86521059/A/T    | nonsynonymous | 1 | 0 |
| TMEM243    | chr7 | 86825978/G/T    | nonsynonymous | 1 | 0 |
| ADAM22     | chr7 | 87774511/C/T    | synonymous    | 1 | 0 |
| AKAP9      | chr7 | 91632259/C/G    | nonsynonymous | 1 | 0 |
| AKAP9      | chr7 | 91671391/C/CAG  | nonsynonymous | 1 | 0 |
| AKAP9      | chr7 | 91671391/CAG/C  | nonsynonymous | 1 | 0 |
| DLX6       | chr7 | 96639226/C/T    | nonsynonymous | 1 | 0 |
| BHLHA15    | chr7 | 97841714/G/A    | synonymous    | 1 | 0 |
| TECPR1     | chr7 | 97866237/GAA/G  | synonymous    | 1 | 0 |
| BAIAP2L1   | chr7 | 97941417/TTC/T  | nonsynonymous | 1 | 0 |
| PTCD1      | chr7 | 99021415/G/T    | nonsynonymous | 1 | 0 |
| ZNF789     | chr7 | 99084964/G/A    | synonymous    | 1 | 0 |
| ZNF394     | chr7 | 99096363/CCTT/C | nonsynonymous | 1 | 0 |
| GATS       | chr7 | 99821630/C/A    | nonsynonymous | 1 | 0 |
| MUC12      | chr7 | 100635818/T/C   | synonymous    | 1 | 0 |
| FBXL13     | chr7 | 102572379/G/T   | nonsynonymous | 1 | 0 |
| FBXL13     | chr7 | 102667935/A/T   | nonsynonymous | 1 | 0 |
| DNAJC2     | chr7 | 102960240/C/A   | nonsynonymous | 1 | 0 |
| LAMB1      | chr7 | 107569989/T/G   | nonsynonymous | 1 | 0 |
| LAMB1      | chr7 | 107580772/C/T   | synonymous    | 1 | 0 |
| FOXP2      | chr7 | 114066640/G/A   | nonsynonymous | 1 | 0 |
| MET        | chr7 | 116340103/T/G   | nonsynonymous | 1 | 0 |
| MET        | chr7 | 116380016/C/T   | nonsynonymous | 1 | 0 |
| CTTNBP2    | chr7 | 117431448/T/G   | nonsynonymous | 1 | 0 |
| KCND2      | chr7 | 119914673/C/T   | synonymous    | 1 | 0 |
| AASS       | chr7 | 121716586/G/A   | nonsynonymous | 1 | 0 |
| RNF148     | chr7 | 122342863/A/G   | synonymous    | 1 | 0 |
| GRM8       | chr7 | 126086295/C/A   | nonsynonymous | 1 | 0 |
| UBE2H      | chr7 | 129519401/A/C   | synonymous    | 1 | 0 |
| KLHDC10    | chr7 | 129770502/G/A   | synonymous    | 1 | 0 |
| CPA4       | chr7 | 129938592/A/C   | nonsynonymous | 1 | 0 |
| ATP6V0A4   | chr7 | 138437551/C/T   | nonsynonymous | 1 | 0 |
| DENND2A    | chr7 | 140221739/G/A   | nonsynonymous | 1 | 0 |
| TAS2R38    | chr7 | 141672670/G/A   | nonsynonymous | 1 | 0 |
| EPHB6      | chr7 | 142567571/G/A   | nonsynonymous | 1 | 0 |
| EPHA1      | chr7 | 143098621/G/A   | synonymous    | 1 | 0 |
| ZNF467     | chr7 | 149462454/G/A   | synonymous    | 1 | 0 |
| SSPO       | chr7 | 149477491/C/T   | nonsynonymous | 1 | 0 |
| GIMAP1     | chr7 | 150417581/C/T   | synonymous    | 1 | 0 |
| ATG9B      | chr7 | 150721080/G/T   | nonsynonymous | 1 | 0 |
| CDK5       | chr7 | 150751560/C/T   | synonymous    | 1 | 0 |
|            | chr7 | 150759818/T/C   | synonymous    | 1 | 0 |
| PAXIP1-AS2 | chr7 | 154738364/C/T   | synonymous    | 1 | 0 |
| PAXIP1     | chr7 | 154775046/A/C   | synonymous    | 1 | 0 |
| CSMD1      | chr8 | 3265502/C/T     | nonsynonymous | 1 | 0 |
| SPAG11B    | chr8 | 7308410/G/A     | synonymous    | 1 | 0 |
| PPP1R3B    | chr8 | 8998461/C/T     | nonsynonymous | 1 | 0 |
| XKR6       | chr8 | 10755924/G/A    | synonymous    | 1 | 0 |
| SGCZ       | chr8 | 13948034/C/A    | nonsynonymous | 1 | 0 |
| MTMR7      | chr8 | 17218640/T/C    | nonsynonymous | 1 | 0 |
| CCAR2      | chr8 | 22471637/G/A    | nonsynonymous | 1 | 0 |
| CCAR2      | chr8 | 22473325/C/A    | nonsynonymous | 1 | 0 |
| LOXL2      | chr8 | 23167207/G/A    | synonymous    | 1 | 0 |
| NKX3-1     | chr8 | 23538913/G/A    | nonsynonymous | 1 | 0 |
| ADAM28     | chr8 | 24151625/CGAG/C | synonymous    | 1 | 0 |
| PTK2B      | chr8 | 27289827/G/A    | synonymous    | 1 | 0 |
| INTS9      | chr8 | 28717005/C/T    | nonsynonymous | 1 | 0 |
| GTF2E2     | chr8 | 30436510/T/C    | synonymous    | 1 | 0 |
| TTI2       | chr8 | 33367316/G/T    | nonsynonymous | 1 | 0 |
| IDO2       | chr8 | 39847357/G/A    | nonsynonymous | 1 | 0 |
| POLB       | chr8 | 42229091/A/C    | synonymous    | 1 | 0 |
| PRKDC      | chr8 | 48839861/T/C    | nonsynonymous | 1 | 0 |
| PXDNL      | chr8 | 52336239/G/A    | nonsynonymous | 1 | 0 |
| ST18       | chr8 | 53079447/G/A    | nonsynonymous | 1 | 0 |
| ST18       | chr8 | 53084645/G/A    | nonsynonymous | 1 | 0 |
| LYPLA1     | chr8 | 54965240/A/G    | nonsynonymous | 1 | 0 |
| RRS1       | chr8 | 67342012/G/A    | nonsynonymous | 1 | 0 |
| ZFHX4      | chr8 | 77763378/A/G    | synonymous    | 1 | 0 |
| ZFHX4      | chr8 | 77763388/A/T    | nonsynonymous | 1 | 0 |

|           |       |                    |               |   |   |
|-----------|-------|--------------------|---------------|---|---|
| CA3       | chr8  | 86358426/G//A      | nonsynonymous | 1 | 0 |
| UBR5      | chr8  | 103274241/G//T     | nonsynonymous | 1 | 0 |
| PKHD1L1   | chr8  | 110456058/C//T     | nonsynonymous | 1 | 0 |
| COLEC10   | chr8  | 120101977/C//T     | synonymous    | 1 | 0 |
| COL14A1   | chr8  | 121256213/C//T     | synonymous    | 1 | 0 |
| ATAD2     | chr8  | 124382161/A//T     | nonsynonymous | 1 | 0 |
| NDRG1     | chr8  | 134270645/T//C     | synonymous    | 1 | 0 |
| TRAPPC9   | chr8  | 140743452/G//A     | nonsynonymous | 1 | 0 |
| AGO2      | chr8  | 141569591/G//A     | synonymous    | 1 | 0 |
| PTK2      | chr8  | 141900634/G//A     | synonymous    | 1 | 0 |
| ADGRB1    | chr8  | 143545613/A//ACTG  | nonsynonymous | 1 | 0 |
| ADGRB1    | chr8  | 143562726/G//T     | synonymous    | 1 | 0 |
| ZC3H3     | chr8  | 144618480/G//A     | nonsynonymous | 1 | 0 |
| EPPK1     | chr8  | 144942425/G//A     | nonsynonymous | 1 | 0 |
| PLEC      | chr8  | 145007393/G//A     | nonsynonymous | 1 | 0 |
| GPT       | chr8  | 145732422/T//C     | synonymous    | 1 | 0 |
| KCNV2     | chr9  | 2729544/C//T       | synonymous    | 1 | 0 |
| GLIS3     | chr9  | 3932477/GAGAA//G   | synonymous    | 1 | 0 |
| UBAP1     | chr9  | 34241382/T//C      | nonsynonymous | 1 | 0 |
| ARID3C    | chr9  | 34621507/G//A      | nonsynonymous | 1 | 0 |
| RUSC2     | chr9  | 35548488/C//T      | nonsynonymous | 1 | 0 |
| FAM189A2  | chr9  | 72006723/C//A      | synonymous    | 1 | 0 |
| VPS13A    | chr9  | 79980443/A//G      | nonsynonymous | 1 | 0 |
| BICD2     | chr9  | 95482664/G//A      | nonsynonymous | 1 | 0 |
| FBP1      | chr9  | 97367752/CTCT//C   | nonsynonymous | 1 | 0 |
| LOC158434 | chr9  | 98876971/G//T      | synonymous    | 1 | 0 |
| ALG2      | chr9  | 101980646/ACT//A   | nonsynonymous | 1 | 0 |
| ABCA1     | chr9  | 107576738/C//T     | nonsynonymous | 1 | 0 |
| SVEP1     | chr9  | 113173602/C//T     | nonsynonymous | 1 | 0 |
| OR2K2     | chr9  | 114090169/G//A     | nonsynonymous | 1 | 0 |
| AKNA      | chr9  | 117124045/G//A     | nonsynonymous | 1 | 0 |
| WHRN      | chr9  | 117266881/C//T     | synonymous    | 1 | 0 |
| PSMD5     | chr9  | 123589114/CCCTT//C | nonsynonymous | 1 | 0 |
| TRAF1     | chr9  | 123675814/C//T     | nonsynonymous | 1 | 0 |
| RAB14     | chr9  | 123943776/A//G     | synonymous    | 1 | 0 |
| RC3H2     | chr9  | 125620999/C//T     | synonymous    | 1 | 0 |
| CIZ1      | chr9  | 130929386/T//C     | nonsynonymous | 1 | 0 |
| SLC27A4   | chr9  | 131105522/C//T     | synonymous    | 1 | 0 |
| ABL1      | chr9  | 133748333/C//T     | nonsynonymous | 1 | 0 |
| DBH       | chr9  | 136507554/C//A     | nonsynonymous | 1 | 0 |
| COL5A1    | chr9  | 137646164/G//A     | nonsynonymous | 1 | 0 |
| NOTCH1    | chr9  | 139390545/C//T     | nonsynonymous | 1 | 0 |
| NOTCH1    | chr9  | 139401345/C//T     | nonsynonymous | 1 | 0 |
| STPG3     | chr9  | 140147634/C//T     | synonymous    | 1 | 0 |
| NELFB     | chr9  | 140157598/C//T     | nonsynonymous | 1 | 0 |
| IDI2      | chr10 | 1068645/C//T       | synonymous    | 1 | 0 |
| CALML3    | chr10 | 5567348/C//T       | synonymous    | 1 | 0 |
| KIN       | chr10 | 7804456/C//T       | nonsynonymous | 1 | 0 |
| GATA3     | chr10 | 8100385/C//T       | nonsynonymous | 1 | 0 |
| MCM10     | chr10 | 13214463/G//A      | nonsynonymous | 1 | 0 |
| RSU1      | chr10 | 16796963/G//A      | nonsynonymous | 1 | 0 |
| PLXDC2    | chr10 | 20106038/C//T      | synonymous    | 1 | 0 |
| SPAG6     | chr10 | 22634526/G//A      | synonymous    | 1 | 0 |
| THNSL1    | chr10 | 25313813/G//A      | nonsynonymous | 1 | 0 |
| SVIL      | chr10 | 29759374/C//T      | nonsynonymous | 1 | 0 |
| ZNF33A    | chr10 | 38345239/C//T      | synonymous    | 1 | 0 |
|           | chr10 | 38404289/C//A      | synonymous    | 1 | 0 |
| TMEM72    | chr10 | 45429081/C//T      | synonymous    | 1 | 0 |
| FRMPD2    | chr10 | 49395262/CAG//C    | nonsynonymous | 1 | 0 |
| VSTM4     | chr10 | 50285340/G//A      | synonymous    | 1 | 0 |
| ERCC6     | chr10 | 50669425/C//G      | nonsynonymous | 1 | 0 |
| DKK1      | chr10 | 54074727/C//T      | synonymous    | 1 | 0 |
| ARID5B    | chr10 | 63700111/C//A      | nonsynonymous | 1 | 0 |
| JMJD1C    | chr10 | 64936171/C//T      | nonsynonymous | 1 | 0 |
| HK1       | chr10 | 71146123/C//T      | synonymous    | 1 | 0 |
| TACR2     | chr10 | 71164812/G//A      | nonsynonymous | 1 | 0 |
| AIFM2     | chr10 | 71877583/C//T      | nonsynonymous | 1 | 0 |
| EIF4EBP2  | chr10 | 72179787/T//A      | nonsynonymous | 1 | 0 |
| DNAJB12   | chr10 | 74097988/T//C      | nonsynonymous | 1 | 0 |
| MRPS16    | chr10 | 75012240/T//C      | nonsynonymous | 1 | 0 |

|          |       |                    |               |   |   |
|----------|-------|--------------------|---------------|---|---|
| ZSWIM8   | chr10 | 75552600/G//T      | nonsynonymous | 1 | 0 |
| VCL      | chr10 | 75857078/T//A      | synonymous    | 1 | 0 |
| SH2D4B   | chr10 | 82330038/C//T      | nonsynonymous | 1 | 0 |
| CCSER2   | chr10 | 86130961/C//T      | synonymous    | 1 | 0 |
| MMRN2    | chr10 | 88696451/G//A      | synonymous    | 1 | 0 |
| EXOC6    | chr10 | 94816756/C//T      | nonsynonymous | 1 | 0 |
| MYOF     | chr10 | 95191232/C//T      | nonsynonymous | 1 | 0 |
| SORBS1   | chr10 | 97158877/C//A      | nonsynonymous | 1 | 0 |
| HOGA1    | chr10 | 99371343/C//T      | nonsynonymous | 1 | 0 |
| DNMBP    | chr10 | 101646266/G//A     | nonsynonymous | 1 | 0 |
| POLL     | chr10 | 103339476/G//A     | nonsynonymous | 1 | 0 |
| ELOVL3   | chr10 | 103988225/C//T     | synonymous    | 1 | 0 |
| GBF1     | chr10 | 104128503/G//A     | nonsynonymous | 1 | 0 |
| NFKB2    | chr10 | 104160959/C//T     | synonymous    | 1 | 0 |
| INA      | chr10 | 105037661/C//T     | synonymous    | 1 | 0 |
| SH3PXD2A | chr10 | 105362551/G//A     | synonymous    | 1 | 0 |
| SH3PXD2A | chr10 | 105428364/A//G     | nonsynonymous | 1 | 0 |
| ZDHHC6   | chr10 | 114201968/GTACA//G | nonsynonymous | 1 | 0 |
| DCLRE1A  | chr10 | 115605438/A//G     | synonymous    | 1 | 0 |
| TRUB1    | chr10 | 116698259/G//A     | nonsynonymous | 1 | 0 |
| ATRNL1   | chr10 | 117059645/C//T     | synonymous    | 1 | 0 |
| CPXM2    | chr10 | 125528096/C//A     | synonymous    | 1 | 0 |
| METTL10  | chr10 | 126454007/C//T     | synonymous    | 1 | 0 |
| FAM196A  | chr10 | 128973879/G//T     | nonsynonymous | 1 | 0 |
| KNDC1    | chr10 | 135012703/G//A     | synonymous    | 1 | 0 |
| TUBGCP2  | chr10 | 135096700/C//T     | nonsynonymous | 1 | 0 |
| CYP2E1   | chr10 | 135352468/A//C     | nonsynonymous | 1 | 0 |
| LMNTD2   | chr11 | 555766/C//T        | synonymous    | 1 | 0 |
| MUC6     | chr11 | 1016181/G//A       | nonsynonymous | 1 | 0 |
| MUC6     | chr11 | 1027416/C//T       | nonsynonymous | 1 | 0 |
| MUC5B    | chr11 | 1260191/G//A       | nonsynonymous | 1 | 0 |
| MRPL23   | chr11 | 1977505/C//T       | nonsynonymous | 1 | 0 |
| TRPM5    | chr11 | 2432869/C//T       | nonsynonymous | 1 | 0 |
| OSBPL5   | chr11 | 3111907/C//T       | nonsynonymous | 1 | 0 |
| OSBPL5   | chr11 | 3114838/G//A       | nonsynonymous | 1 | 0 |
| TRIM68   | chr11 | 4621807/T//A       | nonsynonymous | 1 | 0 |
| TRIM68   | chr11 | 4621826/C//A       | nonsynonymous | 1 | 0 |
| FAM160A2 | chr11 | 6244992/G//A       | nonsynonymous | 1 | 0 |
| TIMM10B  | chr11 | 6502733/G//A       | synonymous    | 1 | 0 |
| DNHD1    | chr11 | 6579307/C//T       | nonsynonymous | 1 | 0 |
| DCHS1    | chr11 | 6651093/G//A       | synonymous    | 1 | 0 |
| DENND5A  | chr11 | 9200512/T//A       | nonsynonymous | 1 | 0 |
| KCNA4    | chr11 | 30033223/C//T      | nonsynonymous | 1 | 0 |
| RAG1     | chr11 | 36595034/G//A      | synonymous    | 1 | 0 |
| ACCSL    | chr11 | 44077820/T//C      | nonsynonymous | 1 | 0 |
| ACCSL    | chr11 | 44081396/C//T      | nonsynonymous | 1 | 0 |
| EXT2     | chr11 | 44265712/A//G      | nonsynonymous | 1 | 0 |
| LARGE2   | chr11 | 45949735/G//A      | nonsynonymous | 1 | 0 |
| CREB3L1  | chr11 | 46341846/C//T      | synonymous    | 1 | 0 |
| AMBRA1   | chr11 | 46564956/G//A      | synonymous    | 1 | 0 |
| SPI1     | chr11 | 47399980/C//T      | synonymous    | 1 | 0 |
| C1QTNF4  | chr11 | 47611937/G//A      | synonymous    | 1 | 0 |
| SSRP1    | chr11 | 57100236/G//A      | nonsynonymous | 1 | 0 |
| RTN4RL2  | chr11 | 57244377/A//G      | nonsynonymous | 1 | 0 |
| UBE2L6   | chr11 | 57319894/C//T      | synonymous    | 1 | 0 |
| OR9Q2    | chr11 | 57958188/G//A      | nonsynonymous | 1 | 0 |
| ZP1      | chr11 | 60642695/G//A      | nonsynonymous | 1 | 0 |
| TMEM109  | chr11 | 60688363/G//A      | synonymous    | 1 | 0 |
| TKFC     | chr11 | 61106630/G//A      | nonsynonymous | 1 | 0 |
| FEN1     | chr11 | 61563190/C//T      | synonymous    | 1 | 0 |
| RTN3     | chr11 | 63487703/G//T      | nonsynonymous | 1 | 0 |
| TRPT1    | chr11 | 63992065/G//A      | nonsynonymous | 1 | 0 |
| NRXN2    | chr11 | 64398008/G//A      | nonsynonymous | 1 | 0 |
| ATG2A    | chr11 | 64665390/C//T      | nonsynonymous | 1 | 0 |
| CAPN1    | chr11 | 64955904/G//A      | nonsynonymous | 1 | 0 |
| LTBP3    | chr11 | 65306813/C//T      | nonsynonymous | 1 | 0 |
| PCNX3    | chr11 | 65402067/T//C      | nonsynonymous | 1 | 0 |
| EFEMP2   | chr11 | 65635430/C//T      | nonsynonymous | 1 | 0 |
| CATSPER1 | chr11 | 65792928/G//A      | nonsynonymous | 1 | 0 |
| CTSF     | chr11 | 66331417/G//A      | nonsynonymous | 1 | 0 |



|          |       |                          |               |   |   |
|----------|-------|--------------------------|---------------|---|---|
| SPTBN2   | chr11 | 66478070/G//A            | synonymous    | 1 | 0 |
| RAD9A    | chr11 | 67161081/G//A            | nonsynonymous | 1 | 0 |
| CARNS1   | chr11 | 67191750/G//A            | nonsynonymous | 1 | 0 |
| RPS6KB2  | chr11 | 67202501/C//T            | nonsynonymous | 1 | 0 |
| RPS6KB2  | chr11 | 67202561/C//T            | nonsynonymous | 1 | 0 |
| CORO1B   | chr11 | 67206223/C//T            | synonymous    | 1 | 0 |
| RNF121   | chr11 | 71701702/A//T            | nonsynonymous | 1 | 0 |
| INPPL1   | chr11 | 71946411/C//T            | nonsynonymous | 1 | 0 |
| PGM2L1   | chr11 | 74058250/A//G            | synonymous    | 1 | 0 |
| RNF169   | chr11 | 74547252/A//G            | nonsynonymous | 1 | 0 |
| SLCO2B1  | chr11 | 74880777/G//A            | nonsynonymous | 1 | 0 |
| MYO7A    | chr11 | 76910723/C//T            | nonsynonymous | 1 | 0 |
|          | chr11 | 85689112/C//T            | synonymous    | 1 | 0 |
| ME3      | chr11 | 86158135/G//A            | nonsynonymous | 1 | 0 |
| NOX4     | chr11 | 89106601/T//C            | synonymous    | 1 | 0 |
| FAT3     | chr11 | 92590382/G//A            | nonsynonymous | 1 | 0 |
| MRE11    | chr11 | 94209558/C//T            | nonsynonymous | 1 | 0 |
| RDX      | chr11 | 110143339/G//A           | synonymous    | 1 | 0 |
| C11orf52 | chr11 | 111796699/G//T           | nonsynonymous | 1 | 0 |
| TTC12    | chr11 | 113194114/G//A           | nonsynonymous | 1 | 0 |
| ANKK1    | chr11 | 113270139/G//A           | nonsynonymous | 1 | 0 |
| CCDC84   | chr11 | 118869767/G//A           | nonsynonymous | 1 | 0 |
| OR8D1    | chr11 | 124179867/T//A           | nonsynonymous | 1 | 0 |
| TBRG1    | chr11 | 124496402/C//T           | nonsynonymous | 1 | 0 |
| HYLS1    | chr11 | 125769890/G//C           | nonsynonymous | 1 | 0 |
| ARHGAP32 | chr11 | 128842779/T//C           | nonsynonymous | 1 | 0 |
| BARX2    | chr11 | 129306798/G//A           | nonsynonymous | 1 | 0 |
| CACNA1C  | chr12 | 2566843/G//A             | nonsynonymous | 1 | 0 |
| ANO2     | chr12 | 5685129/T//A             | nonsynonymous | 1 | 0 |
| CD163    | chr12 | 7633810/C//T             | nonsynonymous | 1 | 0 |
| GDF3     | chr12 | 7842887/A//C             | nonsynonymous | 1 | 0 |
| A2M      | chr12 | 9220331/A//G             | synonymous    | 1 | 0 |
| DUSP16   | chr12 | 12630318/G//A            | nonsynonymous | 1 | 0 |
| GRIN2B   | chr12 | 13716975/T//C            | nonsynonymous | 1 | 0 |
| RERG     | chr12 | 15262301/A//T            | nonsynonymous | 1 | 0 |
| SLCO1B1  | chr12 | 21392016/A//G            | nonsynonymous | 1 | 0 |
| ITPR2    | chr12 | 26492303/G//T            | synonymous    | 1 | 0 |
| ITPR2    | chr12 | 26540523/A//G            | synonymous    | 1 | 0 |
| SLC38A1  | chr12 | 46591833/G//A            | nonsynonymous | 1 | 0 |
| TMEM106C | chr12 | 48358117/A//C            | nonsynonymous | 1 | 0 |
| WNT1     | chr12 | 49374262/G//A            | synonymous    | 1 | 0 |
| KMT2D    | chr12 | 49420034/G//A            | nonsynonymous | 1 | 0 |
| TUBA1B   | chr12 | 49521828/T//G            | nonsynonymous | 1 | 0 |
| METTL7A  | chr12 | 51319005/C//A            | nonsynonymous | 1 | 0 |
| SCN8A    | chr12 | 52096685/A//T            | nonsynonymous | 1 | 0 |
| ACVR1B   | chr12 | 52374782/G//A            | nonsynonymous | 1 | 0 |
| KRT6C    | chr12 | 52863037/C//T            | nonsynonymous | 1 | 0 |
| KRT6C    | chr12 | 52865898/T//A            | nonsynonymous | 1 | 0 |
| TNS2     | chr12 | 53450839/C//T            | synonymous    | 1 | 0 |
| C12orf10 | chr12 | 53699803/C//T            | nonsynonymous | 1 | 0 |
| MAP3K12  | chr12 | 53876390/G//T            | nonsynonymous | 1 | 0 |
| OR6C3    | chr12 | 55726169/A//G            | nonsynonymous | 1 | 0 |
| ZC3H10   | chr12 | 56514380/G//A            | nonsynonymous | 1 | 0 |
| SMARCC2  | chr12 | 56559297/C//T            | nonsynonymous | 1 | 0 |
| TIMELESS | chr12 | 56822668/G//A            | nonsynonymous | 1 | 0 |
| GPR182   | chr12 | 57389445/G//A            | nonsynonymous | 1 | 0 |
| LRP1     | chr12 | 57589752/C//T            | synonymous    | 1 | 0 |
| LRP1     | chr12 | 57602927/C//T            | synonymous    | 1 | 0 |
| CTDSP2   | chr12 | 58223341/G//A            | nonsynonymous | 1 | 0 |
| E2F7     | chr12 | 77423610/CCTTGGGCATGA//C | nonsynonymous | 1 | 0 |
| NAV3     | chr12 | 78512077/G//A            | nonsynonymous | 1 | 0 |
| OTOGL    | chr12 | 80647292/A//G            | synonymous    | 1 | 0 |
| ACSS3    | chr12 | 81472059/C//T            | synonymous    | 1 | 0 |
| TMTC3    | chr12 | 88588912/A//G            | nonsynonymous | 1 | 0 |
| NR2C1    | chr12 | 95452105/C//T            | synonymous    | 1 | 0 |
| CDK17    | chr12 | 96679828/C//T            | nonsynonymous | 1 | 0 |
| GAS2L3   | chr12 | 101005850/G//A           | nonsynonymous | 1 | 0 |
| STAB2    | chr12 | 104025461/G//T           | nonsynonymous | 1 | 0 |
| MVK      | chr12 | 110019275/C//T           | synonymous    | 1 | 0 |
| FAM222A  | chr12 | 110206569/G//A           | nonsynonymous | 1 | 0 |

|           |       |                   |               |   |   |
|-----------|-------|-------------------|---------------|---|---|
| RASAL1    | chr12 | 113565611/G//A    | synonymous    | 1 | 0 |
| RASAL1    | chr12 | 113565892/C//T    | nonsynonymous | 1 | 0 |
| KDM2B     | chr12 | 121879044/C//A    | synonymous    | 1 | 0 |
| TMEM120B  | chr12 | 122150739/G//A    | synonymous    | 1 | 0 |
| LRRC43    | chr12 | 122669280/CCTT//C | nonsynonymous | 1 | 0 |
| LRRC43    | chr12 | 122674895/G//A    | nonsynonymous | 1 | 0 |
| PITPNM2   | chr12 | 123480003/G//A    | nonsynonymous | 1 | 0 |
| NCOR2     | chr12 | 124829476/T//C    | nonsynonymous | 1 | 0 |
| SACS      | chr13 | 23915737/A//C     | nonsynonymous | 1 | 0 |
| DCLK1     | chr13 | 36367516/A//T     | nonsynonymous | 1 | 0 |
| SMAD9     | chr13 | 37453735/T//C     | nonsynonymous | 1 | 0 |
| FAM216B   | chr13 | 43362907/G//A     | nonsynonymous | 1 | 0 |
| SIAH3     | chr13 | 46357845/G//A     | synonymous    | 1 | 0 |
| TBC1D4    | chr13 | 75936553/C//T     | nonsynonymous | 1 | 0 |
| IRS2      | chr13 | 110435247/T//C    | nonsynonymous | 1 | 0 |
| MCF2L     | chr13 | 113750949/C//T    | nonsynonymous | 1 | 0 |
| TEP1      | chr14 | 20864043/G//T     | synonymous    | 1 | 0 |
| CHD8      | chr14 | 21859717/T//A     | nonsynonymous | 1 | 0 |
| SLC7A8    | chr14 | 23598893/C//T     | nonsynonymous | 1 | 0 |
| NPAS3     | chr14 | 34269589/G//A     | synonymous    | 1 | 0 |
| SEC23A    | chr14 | 39545272/C//T     | nonsynonymous | 1 | 0 |
| DHRS7     | chr14 | 60619659/G//A     | nonsynonymous | 1 | 0 |
| MAX       | chr14 | 65569181/A//G     | synonymous    | 1 | 0 |
| DCAF5     | chr14 | 69522003/C//T     | nonsynonymous | 1 | 0 |
| EXD2      | chr14 | 69704341/A//G     | nonsynonymous | 1 | 0 |
| SIPA1L1   | chr14 | 72138170/C//T     | nonsynonymous | 1 | 0 |
| RPS6KL1   | chr14 | 75373831/CAG//C   | synonymous    | 1 | 0 |
| IRF2BPL   | chr14 | 77492076/G//A     | nonsynonymous | 1 | 0 |
| UNC79     | chr14 | 94088440/C//G     | nonsynonymous | 1 | 0 |
| BDKRB1    | chr14 | 96730711/C//T     | nonsynonymous | 1 | 0 |
| BCL11B    | chr14 | 99641745/C//T     | synonymous    | 1 | 0 |
| BEGAIN    | chr14 | 101005071/G//A    | synonymous    | 1 | 0 |
| HSP90AA1  | chr14 | 102549948/A//G    | nonsynonymous | 1 | 0 |
| MAGEL2    | chr15 | 23890249/G//A     | nonsynonymous | 1 | 0 |
| LOC283710 | chr15 | 31515380/G//T     | synonymous    | 1 | 0 |
| ACTC1     | chr15 | 35085681/G//A     | synonymous    | 1 | 0 |
| PLA2G4E   | chr15 | 42289349/C//A     | nonsynonymous | 1 | 0 |
| ZNF106    | chr15 | 42717214/G//A     | nonsynonymous | 1 | 0 |
| DUOX1     | chr15 | 45440497/C//T     | synonymous    | 1 | 0 |
| COPS2     | chr15 | 49429384/A//T     | nonsynonymous | 1 | 0 |
| UNC13C    | chr15 | 54916051/A//G     | synonymous    | 1 | 0 |
| TLN2      | chr15 | 62990954/C//G     | nonsynonymous | 1 | 0 |
| TLE3      | chr15 | 70349854/C//T     | nonsynonymous | 1 | 0 |
| PARP6     | chr15 | 72552975/T//C     | synonymous    | 1 | 0 |
| EDC3      | chr15 | 74963814/G//A     | nonsynonymous | 1 | 0 |
| ADAMTS7   | chr15 | 79083560/A//C     | synonymous    | 1 | 0 |
| CTSH      | chr15 | 79215337/G//A     | synonymous    | 1 | 0 |
| RASGRF1   | chr15 | 79265671/G//A     | synonymous    | 1 | 0 |
| TMED3     | chr15 | 79606219/G//A     | nonsynonymous | 1 | 0 |
| WFIKKN1   | chr16 | 683118/G//A       | nonsynonymous | 1 | 0 |
| FBXL16    | chr16 | 744667/C//G       | nonsynonymous | 1 | 0 |
| CCDC78    | chr16 | 774456/G//A       | synonymous    | 1 | 0 |
| CACNA1H   | chr16 | 1254199/C//T      | nonsynonymous | 1 | 0 |
| CACNA1H   | chr16 | 1270066/C//T      | nonsynonymous | 1 | 0 |
| CLCN7     | chr16 | 1510911/G//A      | synonymous    | 1 | 0 |
| ZNF598    | chr16 | 2050440/G//A      | nonsynonymous | 1 | 0 |
| SLC9A3R2  | chr16 | 2088026/C//T      | synonymous    | 1 | 0 |
| TSC2      | chr16 | 2138594/T//G      | nonsynonymous | 1 | 0 |
| SRRM2     | chr16 | 2820429/C//T      | nonsynonymous | 1 | 0 |
| CREBBP    | chr16 | 3779009/C//A      | nonsynonymous | 1 | 0 |
| NUDT16L1  | chr16 | 4743811/C//T      | synonymous    | 1 | 0 |
| ABAT      | chr16 | 8862092/G//A      | nonsynonymous | 1 | 0 |
| TEKT5     | chr16 | 10788719/A//G     | synonymous    | 1 | 0 |
| CIITA     | chr16 | 11004047/C//T     | nonsynonymous | 1 | 0 |
| CPPED1    | chr16 | 12798692/G//A     | synonymous    | 1 | 0 |
| NDE1      | chr16 | 15818080/C//T     | nonsynonymous | 1 | 0 |
| XYLT1     | chr16 | 17202750/G//A     | synonymous    | 1 | 0 |
| ARL6IP1   | chr16 | 18810016/CACTT//C | synonymous    | 1 | 0 |
| DNAH3     | chr16 | 21098318/G//A     | nonsynonymous | 1 | 0 |
| SCNN1B    | chr16 | 23360039/G//A     | nonsynonymous | 1 | 0 |

|           |       |                  |               |   |   |
|-----------|-------|------------------|---------------|---|---|
| PALB2     | chr16 | 23637666/G//A    | nonsynonymous | 1 | 0 |
| ERN2      | chr16 | 23713589/G//T    | nonsynonymous | 1 | 0 |
| ZKSCAN2   | chr16 | 25258678/C//T    | nonsynonymous | 1 | 0 |
| IL21R     | chr16 | 27441411/G//A    | nonsynonymous | 1 | 0 |
| ATP2A1    | chr16 | 28912037/G//A    | nonsynonymous | 1 | 0 |
| KCTD13    | chr16 | 29922307/GCTT//G | nonsynonymous | 1 | 0 |
| TAOK2     | chr16 | 29993080/G//A    | synonymous    | 1 | 0 |
| TBX6      | chr16 | 30097630/C//T    | synonymous    | 1 | 0 |
| CORO1A    | chr16 | 30198700/CAGG//C | nonsynonymous | 1 | 0 |
| ITGAL     | chr16 | 30533122/A//G    | synonymous    | 1 | 0 |
| ZNF646    | chr16 | 31091876/A//C    | nonsynonymous | 1 | 0 |
| N4BP1     | chr16 | 48595366/TTC//T  | nonsynonymous | 1 | 0 |
| PAPD5     | chr16 | 50263126/C//A    | nonsynonymous | 1 | 0 |
| NKD1      | chr16 | 50667212/A//G    | synonymous    | 1 | 0 |
| SNX20     | chr16 | 50707502/G//A    | nonsynonymous | 1 | 0 |
| IRX5      | chr16 | 54966711/G//T    | nonsynonymous | 1 | 0 |
| SLC12A3   | chr16 | 56914061/T//G    | nonsynonymous | 1 | 0 |
| ADGRG3    | chr16 | 57702231/GCTC//G | synonymous    | 1 | 0 |
| KIFC3     | chr16 | 57803598/C//T    | nonsynonymous | 1 | 0 |
|           | chr16 | 58045005/G//T    | synonymous    | 1 | 0 |
| MMP15     | chr16 | 58075586/C//T    | nonsynonymous | 1 | 0 |
| C16orf70  | chr16 | 67144124/C//T    | nonsynonymous | 1 | 0 |
| ESRP2     | chr16 | 68265914/C//T    | nonsynonymous | 1 | 0 |
| PLA2G15   | chr16 | 68289862/C//T    | synonymous    | 1 | 0 |
| MTSS1L    | chr16 | 70698083/C//T    | nonsynonymous | 1 | 0 |
| CMTR2     | chr16 | 71318208/G//C    | nonsynonymous | 1 | 0 |
| TAT       | chr16 | 71602163/G//A    | nonsynonymous | 1 | 0 |
| ZFH3      | chr16 | 72984509/G//A    | synonymous    | 1 | 0 |
| LDHD      | chr16 | 75148559/CAG//C  | nonsynonymous | 1 | 0 |
| CHST5     | chr16 | 75563212/G//A    | synonymous    | 1 | 0 |
| CNTNAP4   | chr16 | 76461484/G//A    | nonsynonymous | 1 | 0 |
| ADAD2     | chr16 | 84229054/T//A    | nonsynonymous | 1 | 0 |
| KIAA0513  | chr16 | 85100714/G//A    | nonsynonymous | 1 | 0 |
| COX4I1    | chr16 | 85838590/C//T    | nonsynonymous | 1 | 0 |
| MVD       | chr16 | 88721602/G//A    | synonymous    | 1 | 0 |
| MVD       | chr16 | 88722528/G//A    | synonymous    | 1 | 0 |
| CBFA2T3   | chr16 | 88951498/C//T    | nonsynonymous | 1 | 0 |
| SPG7      | chr16 | 89614493/C//T    | synonymous    | 1 | 0 |
| DPEP1     | chr16 | 89702753/C//T    | nonsynonymous | 1 | 0 |
| SPIRE2    | chr16 | 89929937/C//T    | synonymous    | 1 | 0 |
| CTNS      | chr17 | 3560069/G//A     | nonsynonymous | 1 | 0 |
| SPNS3     | chr17 | 4352565/C//T     | nonsynonymous | 1 | 0 |
| ARRB2     | chr17 | 4619476/G//T     | nonsynonymous | 1 | 0 |
| ENO3      | chr17 | 4859365/G//A     | nonsynonymous | 1 | 0 |
| NUP88     | chr17 | 5290776/G//A     | nonsynonymous | 1 | 0 |
| BCL6B     | chr17 | 6930348/G//A     | nonsynonymous | 1 | 0 |
| ZBTB4     | chr17 | 7366280/C//T     | nonsynonymous | 1 | 0 |
| POLR2A    | chr17 | 7414827/G//A     | nonsynonymous | 1 | 0 |
| TP53      | chr17 | 7577106/G//T     | nonsynonymous | 1 | 0 |
| KDM6B     | chr17 | 7752560/G//A     | nonsynonymous | 1 | 0 |
| TMEM88    | chr17 | 7758850/G//A     | nonsynonymous | 1 | 0 |
| CNTROB    | chr17 | 7852767/G//A     | nonsynonymous | 1 | 0 |
| CCDC42    | chr17 | 8644901/C//T     | nonsynonymous | 1 | 0 |
| FAM83G    | chr17 | 18881426/C//T    | nonsynonymous | 1 | 0 |
| SPECC1    | chr17 | 20149379/G//A    | nonsynonymous | 1 | 0 |
| FAM222B   | chr17 | 27086837/G//A    | nonsynonymous | 1 | 0 |
| LIG3      | chr17 | 33325268/C//T    | nonsynonymous | 1 | 0 |
| SRCIN1    | chr17 | 36714554/G//A    | nonsynonymous | 1 | 0 |
| MLL7      | chr17 | 36873780/C//A    | nonsynonymous | 1 | 0 |
| RPL23     | chr17 | 37006725/T//G    | nonsynonymous | 1 | 0 |
| ERBB2     | chr17 | 37880988/G//A    | nonsynonymous | 1 | 0 |
| MED24     | chr17 | 38183216/A//G    | synonymous    | 1 | 0 |
| KRT26     | chr17 | 38928009/G//A    | synonymous    | 1 | 0 |
| KRT28     | chr17 | 38954552/C//T    | nonsynonymous | 1 | 0 |
| TMEM99    | chr17 | 38990756/GGA//G  | synonymous    | 1 | 0 |
| KRT12     | chr17 | 39019784/G//A    | nonsynonymous | 1 | 0 |
| KRTAP16-1 | chr17 | 39465179/G//T    | nonsynonymous | 1 | 0 |
| KRT38     | chr17 | 39593735/G//A    | nonsynonymous | 1 | 0 |
| KRT14     | chr17 | 39742999/G//A    | nonsynonymous | 1 | 0 |
| KRT16     | chr17 | 39766102/C//T    | synonymous    | 1 | 0 |

|          |       |                  |               |   |   |
|----------|-------|------------------|---------------|---|---|
| KRT16    | chr17 | 39768832/C//T    | nonsynonymous | 1 | 0 |
| ETV4     | chr17 | 41606588/C//T    | nonsynonymous | 1 | 0 |
| FAM171A2 | chr17 | 42436994/G//A    | nonsynonymous | 1 | 0 |
| EFTUD2   | chr17 | 42962639/G//A    | nonsynonymous | 1 | 0 |
| NMT1     | chr17 | 43180413/C//T    | nonsynonymous | 1 | 0 |
| KPNB1    | chr17 | 45747218/G//A    | nonsynonymous | 1 | 0 |
| SKAP1    | chr17 | 46257560/TTTC//T | nonsynonymous | 1 | 0 |
| HOXB7    | chr17 | 46688163/G//A    | nonsynonymous | 1 | 0 |
| TTLL6    | chr17 | 46847200/A//G    | nonsynonymous | 1 | 0 |
| CALCOCO2 | chr17 | 46933448/T//C    | synonymous    | 1 | 0 |
| ZNF652   | chr17 | 47375724/C//T    | synonymous    | 1 | 0 |
| NGFR     | chr17 | 47590273/G//A    | nonsynonymous | 1 | 0 |
| FAM117A  | chr17 | 47810082/G//A    | nonsynonymous | 1 | 0 |
| ACSF2    | chr17 | 48540901/T//A    | nonsynonymous | 1 | 0 |
| RSAD1    | chr17 | 48559597/C//T    | nonsynonymous | 1 | 0 |
| SPATA20  | chr17 | 48628420/C//A    | nonsynonymous | 1 | 0 |
| ABCC3    | chr17 | 48734136/G//A    | nonsynonymous | 1 | 0 |
| ANKRD40  | chr17 | 48777241/ATCT//A | nonsynonymous | 1 | 0 |
| STXBP4   | chr17 | 53158490/G//C    | nonsynonymous | 1 | 0 |
| METTL2A  | chr17 | 60501252/G//T    | synonymous    | 1 | 0 |
| SMURF2   | chr17 | 62543856/G//T    | nonsynonymous | 1 | 0 |
| CACNG5   | chr17 | 64875117/T//C    | nonsynonymous | 1 | 0 |
| ABCA9    | chr17 | 66980276/C//T    | nonsynonymous | 1 | 0 |
| ABCA10   | chr17 | 67187331/G//A    | nonsynonymous | 1 | 0 |
| ABCA5    | chr17 | 67252413/G//A    | nonsynonymous | 1 | 0 |
| DNAI2    | chr17 | 72308360/G//A    | synonymous    | 1 | 0 |
| CDR2L    | chr17 | 72999773/C//T    | synonymous    | 1 | 0 |
| MRPL58   | chr17 | 73015818/C//T    | nonsynonymous | 1 | 0 |
| RHBDF2   | chr17 | 74471178/C//T    | synonymous    | 1 | 0 |
| TMC6     | chr17 | 76115097/G//A    | synonymous    | 1 | 0 |
| TMC6     | chr17 | 76116846/C//T    | nonsynonymous | 1 | 0 |
| CBX8     | chr17 | 77768438/CTT//C  | nonsynonymous | 1 | 0 |
| RNF213   | chr17 | 78318781/C//T    | nonsynonymous | 1 | 0 |
| CEP131   | chr17 | 79173559/C//T    | nonsynonymous | 1 | 0 |
| TEPSIN   | chr17 | 79207302/G//A    | synonymous    | 1 | 0 |
| SLC38A10 | chr17 | 79249934/G//A    | synonymous    | 1 | 0 |
| CCDC57   | chr17 | 80159757/T//A    | nonsynonymous | 1 | 0 |
| CETN1    | chr18 | 580357/G//A      | synonymous    | 1 | 0 |
| CETN1    | chr18 | 580369/G//A      | synonymous    | 1 | 0 |
| TUBB6    | chr18 | 12308790/A//G    | synonymous    | 1 | 0 |
| MC2R     | chr18 | 13884764/C//T    | nonsynonymous | 1 | 0 |
| DSG1     | chr18 | 28935186/A//G    | synonymous    | 1 | 0 |
| GAREM1   | chr18 | 29848495/G//A    | nonsynonymous | 1 | 0 |
| CCDC178  | chr18 | 30936289/A//G    | nonsynonymous | 1 | 0 |
| INO80C   | chr18 | 33048616/CG//C   | nonsynonymous | 1 | 0 |
| ELP2     | chr18 | 33738797/G//C    | nonsynonymous | 1 | 0 |
| FHOD3    | chr18 | 34205551/C//T    | synonymous    | 1 | 0 |
| FHOD3    | chr18 | 34335224/C//T    | nonsynonymous | 1 | 0 |
| EPG5     | chr18 | 43447720/G//T    | synonymous    | 1 | 0 |
| SERPINB3 | chr18 | 61322907/C//T    | nonsynonymous | 1 | 0 |
| ZNF516   | chr18 | 74091620/C//T    | nonsynonymous | 1 | 0 |
| POLRMT   | chr19 | 617326/G//A      | synonymous    | 1 | 0 |
| CSNK1G2  | chr19 | 1969838/G//A     | nonsynonymous | 1 | 0 |
| MOB3A    | chr19 | 2076952/C//T     | nonsynonymous | 1 | 0 |
| AP3D1    | chr19 | 2114786/G//T     | nonsynonymous | 1 | 0 |
| PLEKHJ1  | chr19 | 2233843/G//A     | nonsynonymous | 1 | 0 |
| AMH      | chr19 | 2250865/G//A     | nonsynonymous | 1 | 0 |
| C19orf35 | chr19 | 2279068/G//A     | nonsynonymous | 1 | 0 |
| TMPRSS9  | chr19 | 2422173/G//A     | nonsynonymous | 1 | 0 |
| ZNF57    | chr19 | 2917068/C//T     | nonsynonymous | 1 | 0 |
| TLE6     | chr19 | 2994074/C//T     | nonsynonymous | 1 | 0 |
| DAPK3    | chr19 | 3959469/G//T     | nonsynonymous | 1 | 0 |
| ZBTB7A   | chr19 | 4054972/C//T     | nonsynonymous | 1 | 0 |
| PTPRS    | chr19 | 5286176/G//A     | synonymous    | 1 | 0 |
| SAFB2    | chr19 | 5592866/C//T     | nonsynonymous | 1 | 0 |
| ZNF557   | chr19 | 7082930/G//C     | nonsynonymous | 1 | 0 |
| ZNF557   | chr19 | 7082995/G//T     | nonsynonymous | 1 | 0 |
| ARHGEF18 | chr19 | 7521296/A//C     | synonymous    | 1 | 0 |
| CLEC4G   | chr19 | 7794324/C//T     | synonymous    | 1 | 0 |
| MAP2K7   | chr19 | 7975600/T//C     | nonsynonymous | 1 | 0 |

|          |       |                  |               |   |   |
|----------|-------|------------------|---------------|---|---|
| TIMM44   | chr19 | 7997819/T//C     | nonsynonymous | 1 | 0 |
| FBN3     | chr19 | 8196139/C//T     | nonsynonymous | 1 | 0 |
| HNRNPM   | chr19 | 8553704/G//A     | nonsynonymous | 1 | 0 |
| PRAM1    | chr19 | 8564192/G//A     | nonsynonymous | 1 | 0 |
| MUC16    | chr19 | 9070823/G//A     | synonymous    | 1 | 0 |
| ZNF177   | chr19 | 9491671/C//T     | nonsynonymous | 1 | 0 |
| DNMT1    | chr19 | 10249170/C//A    | nonsynonymous | 1 | 0 |
| KANK2    | chr19 | 11286574/G//A    | synonymous    | 1 | 0 |
| DOCK6    | chr19 | 11352717/G//A    | synonymous    | 1 | 0 |
| RGL3     | chr19 | 11517431/G//A    | synonymous    | 1 | 0 |
| CNN1     | chr19 | 11657660/G//A    | nonsynonymous | 1 | 0 |
| ZNF563   | chr19 | 12429897/G//A    | synonymous    | 1 | 0 |
| ZNF799   | chr19 | 12501888/T//C    | nonsynonymous | 1 | 0 |
| ZNF799   | chr19 | 12502261/C//T    | synonymous    | 1 | 0 |
| C19orf43 | chr19 | 12841773/C//T    | synonymous    | 1 | 0 |
| MRI1     | chr19 | 13879811/C//T    | nonsynonymous | 1 | 0 |
| PODNL1   | chr19 | 14043709/C//T    | nonsynonymous | 1 | 0 |
| PODNL1   | chr19 | 14046601/C//T    | nonsynonymous | 1 | 0 |
| SYDE1    | chr19 | 15221401/C//T    | nonsynonymous | 1 | 0 |
| WIZ      | chr19 | 15538174/G//A    | nonsynonymous | 1 | 0 |
| OR10H1   | chr19 | 15918479/G//A    | synonymous    | 1 | 0 |
| CYP4F2   | chr19 | 16000324/C//T    | nonsynonymous | 1 | 0 |
| SMIM7    | chr19 | 16764883/C//T    | nonsynonymous | 1 | 0 |
| CPAMD8   | chr19 | 17038901/G//A    | synonymous    | 1 | 0 |
| BABAM1   | chr19 | 17382421/C//A    | nonsynonymous | 1 | 0 |
| NXNL1    | chr19 | 17566739/C//T    | nonsynonymous | 1 | 0 |
| PGLS     | chr19 | 17631789/G//A    | nonsynonymous | 1 | 0 |
| ISYNA1   | chr19 | 18545769/T//C    | nonsynonymous | 1 | 0 |
| COMP     | chr19 | 18895107/CTG//C  | nonsynonymous | 1 | 0 |
| RFXANK   | chr19 | 19309497/G//A    | nonsynonymous | 1 | 0 |
| ZNF429   | chr19 | 21719602/A//T    | nonsynonymous | 1 | 0 |
| ZNF91    | chr19 | 23545374/T//C    | nonsynonymous | 1 | 0 |
| POP4     | chr19 | 30102763/C//T    | synonymous    | 1 | 0 |
| GPATCH1  | chr19 | 33603414/C//T    | nonsynonymous | 1 | 0 |
| GRAMD1A  | chr19 | 35500994/A//G    | nonsynonymous | 1 | 0 |
| GRAMD1A  | chr19 | 35506762/C//A    | synonymous    | 1 | 0 |
| FFAR2    | chr19 | 35940962/C//T    | nonsynonymous | 1 | 0 |
| KMT2B    | chr19 | 36212289/G//A    | synonymous    | 1 | 0 |
| KMT2B    | chr19 | 36219720/CTA//C  | nonsynonymous | 1 | 0 |
| U2AF1L4  | chr19 | 36234972/G//A    | synonymous    | 1 | 0 |
| NPHS1    | chr19 | 36342558/C//T    | synonymous    | 1 | 0 |
| ZNF585B  | chr19 | 37677399/A//T    | nonsynonymous | 1 | 0 |
| CAPN12   | chr19 | 39230703/G//A    | synonymous    | 1 | 0 |
| RINL     | chr19 | 39361545/C//A    | nonsynonymous | 1 | 0 |
| PAK4     | chr19 | 39667346/C//T    | synonymous    | 1 | 0 |
| ZNF780B  | chr19 | 40541063/C//T    | nonsynonymous | 1 | 0 |
| CYP2A7   | chr19 | 41387975/G//C    | synonymous    | 1 | 0 |
| GRIK5    | chr19 | 42509946/C//T    | nonsynonymous | 1 | 0 |
| CLPTM1   | chr19 | 45480633/G//A    | nonsynonymous | 1 | 0 |
| PPP1R37  | chr19 | 45648175/C//T    | nonsynonymous | 1 | 0 |
| NKPD1    | chr19 | 45655705/G//A    | nonsynonymous | 1 | 0 |
| RUVBL2   | chr19 | 49514566/C//T    | nonsynonymous | 1 | 0 |
| TRPM4    | chr19 | 49661040/T//A    | synonymous    | 1 | 0 |
| RRAS     | chr19 | 50139926/AGTC//A | nonsynonymous | 1 | 0 |
| NUP62    | chr19 | 50412230/C//T    | nonsynonymous | 1 | 0 |
| KCNC3    | chr19 | 50826961/G//A    | nonsynonymous | 1 | 0 |
| MYBPC2   | chr19 | 50949234/G//A    | nonsynonymous | 1 | 0 |
| ZNF614   | chr19 | 52520008/A//G    | synonymous    | 1 | 0 |
| ZNF611   | chr19 | 53219136/C//T    | synonymous    | 1 | 0 |
| ZNF331   | chr19 | 54080005/A//G    | nonsynonymous | 1 | 0 |
| NLRP12   | chr19 | 54313858/C//T    | nonsynonymous | 1 | 0 |
| LILRB2   | chr19 | 54778647/C//T    | nonsynonymous | 1 | 0 |
| LENG9    | chr19 | 54974156/T//C    | nonsynonymous | 1 | 0 |
| ZNF628   | chr19 | 55994419/G//A    | nonsynonymous | 1 | 0 |
| SSC5D    | chr19 | 56002261/C//T    | nonsynonymous | 1 | 0 |
| SBK3     | chr19 | 56052682/C//T    | nonsynonymous | 1 | 0 |
| NLRP13   | chr19 | 56443371/C//A    | nonsynonymous | 1 | 0 |
| ZNF444   | chr19 | 56658390/C//T    | nonsynonymous | 1 | 0 |
| ZNF583   | chr19 | 56934369/C//T    | synonymous    | 1 | 0 |
| ZNF835   | chr19 | 57175082/C//T    | synonymous    | 1 | 0 |

|           |       |                     |               |   |   |
|-----------|-------|---------------------|---------------|---|---|
| ZNF419    | chr19 | 58005429/C//T       | nonsynonymous | 1 | 0 |
| ZNF416    | chr19 | 58083987/G//A       | nonsynonymous | 1 | 0 |
| ZNF418    | chr19 | 58439152/C//T       | nonsynonymous | 1 | 0 |
| ZNF135    | chr19 | 58579099/G//A       | nonsynonymous | 1 | 0 |
| ZNF324B   | chr19 | 58967509/G//A       | nonsynonymous | 1 | 0 |
| TRIM28    | chr19 | 59061102/A//G       | nonsynonymous | 1 | 0 |
| CHMP2A    | chr19 | 59063477/TCTC//T    | nonsynonymous | 1 | 0 |
| UBE2M     | chr19 | 59069703/ACTC//A    | nonsynonymous | 1 | 0 |
| TRIB3     | chr20 | 372216/C//T         | nonsynonymous | 1 | 0 |
| ANGPT4    | chr20 | 853512/T//C         | synonymous    | 1 | 0 |
| TMC2      | chr20 | 2597946/C//T        | synonymous    | 1 | 0 |
| MRPS26    | chr20 | 3028480/G//A        | nonsynonymous | 1 | 0 |
| ITPA      | chr20 | 3194024/C//T        | nonsynonymous | 1 | 0 |
| ADAM33    | chr20 | 3655217/G//T        | synonymous    | 1 | 0 |
| SIGLEC1   | chr20 | 3672664/G//A        | nonsynonymous | 1 | 0 |
| HSPA12B   | chr20 | 3732828/G//T        | synonymous    | 1 | 0 |
| ADRA1D    | chr20 | 4228580/C//T        | nonsynonymous | 1 | 0 |
| C2orf196  | chr20 | 5843777/C//T        | nonsynonymous | 1 | 0 |
| LRRN4     | chr20 | 6022512/TCTC//T     | nonsynonymous | 1 | 0 |
| MACROD2   | chr20 | 16030540/G//T       | synonymous    | 1 | 0 |
| SNRPB2    | chr20 | 16721665/G//A       | synonymous    | 1 | 0 |
| XRN2      | chr20 | 21321480/A//G       | nonsynonymous | 1 | 0 |
| THBD      | chr20 | 23028959/C//T       | nonsynonymous | 1 | 0 |
| GZF1      | chr20 | 23351050/A//T       | nonsynonymous | 1 | 0 |
| CST2      | chr20 | 23804668/G//A       | nonsynonymous | 1 | 0 |
| PYGB      | chr20 | 25273163/C//T       | synonymous    | 1 | 0 |
| PYGB      | chr20 | 25277023/CAAG//C    | nonsynonymous | 1 | 0 |
| REM1      | chr20 | 30070124/G//T       | nonsynonymous | 1 | 0 |
| DNMT3B    | chr20 | 31375124/CAG//C     | nonsynonymous | 1 | 0 |
| BPIFA3    | chr20 | 31814763/G//A       | nonsynonymous | 1 | 0 |
| RALY      | chr20 | 32664890/AGCGGTG//A | nonsynonymous | 1 | 0 |
| AHCY      | chr20 | 32868904/T//C       | nonsynonymous | 1 | 0 |
| MMP24     | chr20 | 33842556/C//T       | synonymous    | 1 | 0 |
| CPNE1     | chr20 | 34220286/T//C       | nonsynonymous | 1 | 0 |
| ROMO1     | chr20 | 34288723/C//T       | synonymous    | 1 | 0 |
| DLGAP4    | chr20 | 35155500/CAG//C     | synonymous    | 1 | 0 |
|           | chr20 | 35414971/G//A       | synonymous    | 1 | 0 |
| MANBAL    | chr20 | 35929811/G//A       | nonsynonymous | 1 | 0 |
| PPP1R16B  | chr20 | 37464624/C//T       | nonsynonymous | 1 | 0 |
| PLCG1     | chr20 | 39801484/C//A       | synonymous    | 1 | 0 |
| PTPRT     | chr20 | 40747137/G//A       | nonsynonymous | 1 | 0 |
| SERINC3   | chr20 | 43135617/C//T       | nonsynonymous | 1 | 0 |
| SLC13A3   | chr20 | 45192149/C//T       | synonymous    | 1 | 0 |
| PREX1     | chr20 | 47273667/C//T       | synonymous    | 1 | 0 |
| ARFGEF2   | chr20 | 47626942/G//T       | nonsynonymous | 1 | 0 |
| KCNG1     | chr20 | 49626651/C//T       | synonymous    | 1 | 0 |
| ZBP1      | chr20 | 56179473/C//T       | synonymous    | 1 | 0 |
| STX16     | chr20 | 57251333/G//A       | nonsynonymous | 1 | 0 |
| LAMA5     | chr20 | 60912868/C//T       | nonsynonymous | 1 | 0 |
| SLC17A9   | chr20 | 61594022/G//A       | nonsynonymous | 1 | 0 |
| HELZ2     | chr20 | 62197125/G//A       | nonsynonymous | 1 | 0 |
| ZNF512B   | chr20 | 62591275/C//T       | nonsynonymous | 1 | 0 |
| BTG3      | chr21 | 18981355/T//C       | synonymous    | 1 | 0 |
| BACH1     | chr21 | 30693737/C//T       | nonsynonymous | 1 | 0 |
| KRTAP13-2 | chr21 | 31744546/T//A       | synonymous    | 1 | 0 |
| KRTAP20-3 | chr21 | 32015371/T//A       | synonymous    | 1 | 0 |
| IFNGR2    | chr21 | 34787307/C//T       | synonymous    | 1 | 0 |
| RUNX1     | chr21 | 36253003/G//A       | nonsynonymous | 1 | 0 |
| HLCS      | chr21 | 38126601/C//T       | synonymous    | 1 | 0 |
| DSCR3     | chr21 | 38600558/G//A       | synonymous    | 1 | 0 |
| WDR4      | chr21 | 44279795/C//T       | nonsynonymous | 1 | 0 |
| AIRE      | chr21 | 45707415/C//T       | nonsynonymous | 1 | 0 |
| TRPM2     | chr21 | 45837892/C//T       | nonsynonymous | 1 | 0 |
| KRTAP10-1 | chr21 | 45959727/C//T       | nonsynonymous | 1 | 0 |
| COL6A1    | chr21 | 47414095/G//A       | synonymous    | 1 | 0 |
| PCNT      | chr21 | 47809165/G//T       | nonsynonymous | 1 | 0 |
| CECR1     | chr22 | 17684517/C//T       | nonsynonymous | 1 | 0 |
| ATP6V1E1  | chr22 | 18077351/G//T       | nonsynonymous | 1 | 0 |
|           | chr22 | 18347656/T//C       | synonymous    | 1 | 0 |
| DGCR14    | chr22 | 19121797/G//A       | nonsynonymous | 1 | 0 |

|          |       |                   |               |   |   |
|----------|-------|-------------------|---------------|---|---|
| CLDN5    | chr22 | 19511514/G//A     | synonymous    | 1 | 0 |
| DGCR6L   | chr22 | 20303645/T//C     | synonymous    | 1 | 0 |
| SCARF2   | chr22 | 20784741/AC//A    | nonsynonymous | 1 | 0 |
| CCDC116  | chr22 | 21988654/G//A     | nonsynonymous | 1 | 0 |
| TOP3B    | chr22 | 22318660/G//A     | nonsynonymous | 1 | 0 |
| RSPH14   | chr22 | 23401659/A//G     | nonsynonymous | 1 | 0 |
| CRYBB3   | chr22 | 25603057/G//A     | nonsynonymous | 1 | 0 |
| GAL3ST1  | chr22 | 30951135/G//A     | synonymous    | 1 | 0 |
| SMTN     | chr22 | 31491563/C//T     | nonsynonymous | 1 | 0 |
| MKL1     | chr22 | 40814898/C//T     | nonsynonymous | 1 | 0 |
| ACO2     | chr22 | 41924512/C//T     | synonymous    | 1 | 0 |
| TTLL1    | chr22 | 43464472/G//A     | synonymous    | 1 | 0 |
| MPPED1   | chr22 | 43820980/C//T     | synonymous    | 1 | 0 |
| MPPED1   | chr22 | 43901551/C//T     | synonymous    | 1 | 0 |
| FBLN1    | chr22 | 45944507/G//A     | nonsynonymous | 1 | 0 |
| FBLN1    | chr22 | 45996293/C//T     | synonymous    | 1 | 0 |
| ZBED4    | chr22 | 50279963/A//G     | nonsynonymous | 1 | 0 |
| ZBED4    | chr22 | 50280174/G//A     | nonsynonymous | 1 | 0 |
| PLXNB2   | chr22 | 50715280/ATCT//A  | nonsynonymous | 1 | 0 |
| AKAP17A  | chrX  | 1720304/C//T      | synonymous    | 1 | 0 |
| ARSE     | chrX  | 2861212/C//A      | nonsynonymous | 1 | 0 |
| SHROOM2  | chrX  | 9912752/C//T      | synonymous    | 1 | 0 |
| MSL3     | chrX  | 11781060/C//T     | synonymous    | 1 | 0 |
| PDHA1    | chrX  | 19372623/T//C     | synonymous    | 1 | 0 |
| CNKSR2   | chrX  | 21450833/A//G     | nonsynonymous | 1 | 0 |
| KLHL34   | chrX  | 21675110/G//A     | nonsynonymous | 1 | 0 |
| POLA1    | chrX  | 24766500/C//T     | nonsynonymous | 1 | 0 |
| USP9X    | chrX  | 41084056/T//G     | nonsynonymous | 1 | 0 |
| GPR34    | chrX  | 41555109/G//A     | nonsynonymous | 1 | 0 |
| GPR34    | chrX  | 41555509/G//A     | nonsynonymous | 1 | 0 |
| KDM6A    | chrX  | 44929411/CACAA//C | nonsynonymous | 1 | 0 |
| CCDC120  | chrX  | 48924858/G//A     | nonsynonymous | 1 | 0 |
| DGAT2L6  | chrX  | 69421880/C//T     | nonsynonymous | 1 | 0 |
| SLC7A3   | chrX  | 70148046/C//T     | nonsynonymous | 1 | 0 |
| GCNA     | chrX  | 70823781/G//C     | nonsynonymous | 1 | 0 |
| BRWD3    | chrX  | 79938099/G//A     | nonsynonymous | 1 | 0 |
| SATL1    | chrX  | 84362545/C//T     | nonsynonymous | 1 | 0 |
| SYTL4    | chrX  | 99943435/C//T     | synonymous    | 1 | 0 |
| RAB40AL  | chrX  | 102192261/C//T    | synonymous    | 1 | 0 |
| RAB40AL  | chrX  | 102192301/C//T    | synonymous    | 1 | 0 |
|          | chrX  | 107018602/G//A    | synonymous    | 1 | 0 |
| DOCK11   | chrX  | 117727239/T//A    | nonsynonymous | 1 | 0 |
| ATP1B4   | chrX  | 119504684/G//A    | nonsynonymous | 1 | 0 |
| CT47B1   | chrX  | 120008923/G//A    | nonsynonymous | 1 | 0 |
| TENM1    | chrX  | 123554504/C//T    | nonsynonymous | 1 | 0 |
| SLITRK2  | chrX  | 144905707/C//A    | synonymous    | 1 | 0 |
| MTMR1    | chrX  | 149867750/G//T    | nonsynonymous | 1 | 0 |
| PNMA3    | chrX  | 152226290/G//A    | nonsynonymous | 1 | 0 |
| PDZD4    | chrX  | 153073810/C//T    | synonymous    | 1 | 0 |
| AGRN     | chr1  | 989220/G//A       | synonymous    | 1 | 0 |
| SDF4     | chr1  | 1152775/T//G      | synonymous    | 1 | 0 |
| ACAP3    | chr1  | 1231196/T//C      | nonsynonymous | 1 | 0 |
| TMEM52   | chr1  | 1850663/C//T      | synonymous    | 1 | 0 |
| SKI      | chr1  | 2238048/G//A      | synonymous    | 1 | 0 |
| FAM213B  | chr1  | 2522398/G//A      | synonymous    | 1 | 0 |
| ARHGEF16 | chr1  | 3379949/A//G      | nonsynonymous | 1 | 0 |
| MEGF6    | chr1  | 3414992/G//T      | nonsynonymous | 1 | 0 |
| WRAP73   | chr1  | 3548111/G//A      | nonsynonymous | 1 | 0 |
| TNFRSF25 | chr1  | 6524611/C//T      | nonsynonymous | 1 | 0 |
| SLC2A7   | chr1  | 9078354/C//T      | nonsynonymous | 1 | 0 |
| SLC2A5   | chr1  | 9107757/G//A      | synonymous    | 1 | 0 |
| PRDM2    | chr1  | 14142916/G//A     | synonymous    | 1 | 0 |
| CROCC    | chr1  | 17266568/C//T     | synonymous    | 1 | 0 |
| KLHDC7A  | chr1  | 18809401/G//A     | synonymous    | 1 | 0 |
| SH2D5    | chr1  | 21048348/C//T     | synonymous    | 1 | 0 |
| LUZP1    | chr1  | 23420706/G//A     | nonsynonymous | 1 | 0 |
| AIM1L    | chr1  | 26672915/G//A     | synonymous    | 1 | 0 |
| EYA3     | chr1  | 28339675/G//A     | nonsynonymous | 1 | 0 |
| COL16A1  | chr1  | 32149309/T//A     | nonsynonymous | 1 | 0 |
| YARS     | chr1  | 33263372/C//T     | nonsynonymous | 1 | 0 |

|             |      |                       |               |   |   |
|-------------|------|-----------------------|---------------|---|---|
| PHC2        | chr1 | 33820473/G//A         | nonsynonymous | 1 | 0 |
| CSMD2       | chr1 | 34043056/T//C         | synonymous    | 1 | 0 |
| CLSPN       | chr1 | 36226719/C//T         | nonsynonymous | 1 | 0 |
| MACF1       | chr1 | 39816482/G//A         | nonsynonymous | 1 | 0 |
| PABPC4      | chr1 | 40029354/G//A         | nonsynonymous | 1 | 0 |
| TIE1        | chr1 | 43787300/C//T         | nonsynonymous | 1 | 0 |
| SZT2        | chr1 | 43892784/C//T         | nonsynonymous | 1 | 0 |
| HYI         | chr1 | 43919347/G//A         | nonsynonymous | 1 | 0 |
| MOB3C       | chr1 | 47075273/G//A         | synonymous    | 1 | 0 |
| CYP4A22     | chr1 | 47610279/A//G         | nonsynonymous | 1 | 0 |
| PLPP3       | chr1 | 56977797/G//A         | nonsynonymous | 1 | 0 |
| KANK4       | chr1 | 62728894/G//A         | synonymous    | 1 | 0 |
| LRRC7       | chr1 | 70504950/C//T         | nonsynonymous | 1 | 0 |
| FPGT-TNNI3K | chr1 | 74808751/A//G         | synonymous    | 1 | 0 |
| ERICH3      | chr1 | 75039054/C//T         | synonymous    | 1 | 0 |
| DPYD        | chr1 | 97915735/G//T         | synonymous    | 1 | 0 |
| NTNG1       | chr1 | 107867019/C//T        | nonsynonymous | 1 | 0 |
| WDR3        | chr1 | 118492373/G//A        | nonsynonymous | 1 | 0 |
| HMGCS2      | chr1 | 120307195/G//A        | synonymous    | 1 | 0 |
| BCL9        | chr1 | 147096063/C//T        | nonsynonymous | 1 | 0 |
| LCE4A       | chr1 | 152681817/G//T        | nonsynonymous | 1 | 0 |
| LCE6A       | chr1 | 152816139/G//T        | nonsynonymous | 1 | 0 |
| S100A7A     | chr1 | 153390684/T//C        | synonymous    | 1 | 0 |
| DCST2       | chr1 | 155006064/C//T        | synonymous    | 1 | 0 |
| NES         | chr1 | 156640832/C//A        | nonsynonymous | 1 | 0 |
| INSRR       | chr1 | 156810756/G//C        | nonsynonymous | 1 | 0 |
| IGSF9       | chr1 | 159897269/T//C        | nonsynonymous | 1 | 0 |
| ATF6        | chr1 | 161789463/G//A        | nonsynonymous | 1 | 0 |
|             | chr1 | 170993552/G//A        | synonymous    | 1 | 0 |
| FMO2        | chr1 | 171173187/C//A        | nonsynonymous | 1 | 0 |
| CENPL       | chr1 | 173772301/C//T        | nonsynonymous | 1 | 0 |
| TNR         | chr1 | 175299294/C//T        | nonsynonymous | 1 | 0 |
| PAPPA2      | chr1 | 176564651/C//T        | synonymous    | 1 | 0 |
| CACNA1E     | chr1 | 181767775/G//A        | synonymous    | 1 | 0 |
| CRB1        | chr1 | 197326074/G//A        | nonsynonymous | 1 | 0 |
| PRELP       | chr1 | 203453234/G//A        | nonsynonymous | 1 | 0 |
| INTS7       | chr1 | 212118170/TCAGA//T    | nonsynonymous | 1 | 0 |
| EPHX1       | chr1 | 226027607/G//A        | nonsynonymous | 1 | 0 |
| OBSCN       | chr1 | 228437778/G//A        | synonymous    | 1 | 0 |
| NUP133      | chr1 | 229623219/C//T        | nonsynonymous | 1 | 0 |
| SPRTN       | chr1 | 231474135/T//C        | synonymous    | 1 | 0 |
| SPRTN       | chr1 | 231488936/T//A        | nonsynonymous | 1 | 0 |
| LYST        | chr1 | 235926125/G//A        | nonsynonymous | 1 | 0 |
| NID1        | chr1 | 236142389/G//A        | synonymous    | 1 | 0 |
| AKT3        | chr1 | 243716141/A//G        | synonymous    | 1 | 0 |
| ZNF692      | chr1 | 249144986/G//T        | synonymous    | 1 | 0 |
| ASAP2       | chr2 | 9531330/G//A          | synonymous    | 1 | 0 |
| GREB1       | chr2 | 11733078/G//A         | nonsynonymous | 1 | 0 |
| KCNS3       | chr2 | 18112750/T//C         | nonsynonymous | 1 | 0 |
| CENPO       | chr2 | 25039667/C//T         | synonymous    | 1 | 0 |
| DPYSL5      | chr2 | 27150167/C//T         | nonsynonymous | 1 | 0 |
| ZFP36L2     | chr2 | 43452670/CGCCGCGCT//C | nonsynonymous | 1 | 0 |
| SLC3A1      | chr2 | 44531406/G//A         | nonsynonymous | 1 | 0 |
| EPAS1       | chr2 | 46605076/C//T         | synonymous    | 1 | 0 |
| PSME4       | chr2 | 54114505/T//C         | synonymous    | 1 | 0 |
| SPRED2      | chr2 | 65571892/G//A         | synonymous    | 1 | 0 |
| GKN1        | chr2 | 69207131/C//T         | synonymous    | 1 | 0 |
| ANXA4       | chr2 | 70008698/A//G         | nonsynonymous | 1 | 0 |
| AUP1        | chr2 | 74755401/G//A         | synonymous    | 1 | 0 |
| REG3A       | chr2 | 79386576/C//T         | synonymous    | 1 | 0 |
| EIF2AK3     | chr2 | 88885388/G//A         | nonsynonymous | 1 | 0 |
| ARID5A      | chr2 | 97215998/C//T         | nonsynonymous | 1 | 0 |
| FER1L5      | chr2 | 97359382/C//A         | nonsynonymous | 1 | 0 |
| ACTR1B      | chr2 | 98277102/G//A         | nonsynonymous | 1 | 0 |
| ZAP70       | chr2 | 98340514/G//A         | synonymous    | 1 | 0 |
| RPL31       | chr2 | 101620642/C//T        | nonsynonymous | 1 | 0 |
| PAX8        | chr2 | 114035992/C//T        | synonymous    | 1 | 0 |
| RABL2A      | chr2 | 114392711/C//T        | synonymous    | 1 | 0 |
| DPP10       | chr2 | 116594084/C//T        | synonymous    | 1 | 0 |
| DPP10       | chr2 | 116599789/C//A        | synonymous    | 1 | 0 |



|          |      |                    |               |   |   |
|----------|------|--------------------|---------------|---|---|
| CLASP1   | chr2 | 122182758/G//A     | synonymous    | 1 | 0 |
| GPR17    | chr2 | 128409228/G//A     | nonsynonymous | 1 | 0 |
| PTPN18   | chr2 | 131130760/G//A     | nonsynonymous | 1 | 0 |
| NCKAP5   | chr2 | 133542260/T//G     | nonsynonymous | 1 | 0 |
| MMADHC   | chr2 | 150432267/C/AAA//C | nonsynonymous | 1 | 0 |
| NEB      | chr2 | 152536281/G//A     | nonsynonymous | 1 | 0 |
| ERMN     | chr2 | 158177848/G//A     | nonsynonymous | 1 | 0 |
| PLA2R1   | chr2 | 160798643/T//C     | nonsynonymous | 1 | 0 |
| ABCB11   | chr2 | 169836414/G//A     | nonsynonymous | 1 | 0 |
| HOXD10   | chr2 | 176982075/G//T     | nonsynonymous | 1 | 0 |
| PRKRA    | chr2 | 179296971/G//A     | synonymous    | 1 | 0 |
| TTN      | chr2 | 179659805/C//T     | synonymous    | 1 | 0 |
| ANKRD44  | chr2 | 198011816/C//T     | nonsynonymous | 1 | 0 |
| C2orf69  | chr2 | 200776337/C//T     | nonsynonymous | 1 | 0 |
| CASP10   | chr2 | 202074219/G//A     | nonsynonymous | 1 | 0 |
| ALS2CR11 | chr2 | 202352432/C//T     | nonsynonymous | 1 | 0 |
| ALS2CR11 | chr2 | 202483904/G//A     | synonymous    | 1 | 0 |
| NBEAL1   | chr2 | 203942536/T//G     | nonsynonymous | 1 | 0 |
| MARCH4   | chr2 | 217234862/C//T     | nonsynonymous | 1 | 0 |
| PLCD4    | chr2 | 219499283/G//A     | nonsynonymous | 1 | 0 |
| BCS1L    | chr2 | 219526204/G//T     | nonsynonymous | 1 | 0 |
| ABCB6    | chr2 | 220083308/TGAA//T  | nonsynonymous | 1 | 0 |
| SPEG     | chr2 | 220313218/G//A     | synonymous    | 1 | 0 |
| SGPP2    | chr2 | 223423149/G//A     | synonymous    | 1 | 0 |
| CCL20    | chr2 | 228680224/A//T     | nonsynonymous | 1 | 0 |
| CAB39    | chr2 | 231682475/G//A     | nonsynonymous | 1 | 0 |
| NEU2     | chr2 | 233899595/C//T     | nonsynonymous | 1 | 0 |
| INPP5D   | chr2 | 234085947/C//A     | nonsynonymous | 1 | 0 |
| COL6A3   | chr2 | 238268795/C//T     | nonsynonymous | 1 | 0 |
| HDAC4    | chr2 | 239988469/G//A     | synonymous    | 1 | 0 |
| ING5     | chr2 | 242648665/G//A     | synonymous    | 1 | 0 |
| CHL1     | chr3 | 403423/G//A        | nonsynonymous | 1 | 0 |
| CNTN6    | chr3 | 1427482/G//A       | nonsynonymous | 1 | 0 |
| ITPR1    | chr3 | 4752022/C//T       | nonsynonymous | 1 | 0 |
| GRM7     | chr3 | 7620225/C//A       | synonymous    | 1 | 0 |
| SRGAP3   | chr3 | 9166509/G//A       | nonsynonymous | 1 | 0 |
| ATP2B2   | chr3 | 10370571/G//A      | nonsynonymous | 1 | 0 |
| C3orf20  | chr3 | 14801459/C//A      | nonsynonymous | 1 | 0 |
| RBSN     | chr3 | 15115637/C//G      | nonsynonymous | 1 | 0 |
| TOP2B    | chr3 | 25665185/G//T      | nonsynonymous | 1 | 0 |
| CMTM7    | chr3 | 32483464/C//T      | nonsynonymous | 1 | 0 |
| SLC22A14 | chr3 | 38357177/G//A      | nonsynonymous | 1 | 0 |
| CTNNB1   | chr3 | 41266136/T//C      | nonsynonymous | 1 | 0 |
| ULK4     | chr3 | 41723277/G//A      | nonsynonymous | 1 | 0 |
| TRAK1    | chr3 | 42242320/C//T      | nonsynonymous | 1 | 0 |
| SNRK     | chr3 | 43381981/G//A      | nonsynonymous | 1 | 0 |
| TOPAZ1   | chr3 | 44283618/C//T      | nonsynonymous | 1 | 0 |
| CCR5     | chr3 | 46414567/C//T      | synonymous    | 1 | 0 |
| TMIE     | chr3 | 46747287/C//T      | nonsynonymous | 1 | 0 |
| PRSS50   | chr3 | 46759307/C//T      | nonsynonymous | 1 | 0 |
| SETD2    | chr3 | 47147573/C//T      | nonsynonymous | 1 | 0 |
| PTPN23   | chr3 | 47449380/TGAG//T   | nonsynonymous | 1 | 0 |
| BSN      | chr3 | 49693165/G//A      | nonsynonymous | 1 | 0 |
| MST1     | chr3 | 49725324/C//T      | nonsynonymous | 1 | 0 |
| AMIGO3   | chr3 | 49755784/T//C      | nonsynonymous | 1 | 0 |
| UBA7     | chr3 | 49845499/C//T      | nonsynonymous | 1 | 0 |
| MANF     | chr3 | 51422837/A//G      | nonsynonymous | 1 | 0 |
| DCAF1    | chr3 | 51457518/C//T      | nonsynonymous | 1 | 0 |
| PCBP4    | chr3 | 51994635/G//A      | synonymous    | 1 | 0 |
| ALAS1    | chr3 | 52237952/G//A      | synonymous    | 1 | 0 |
| PHF7     | chr3 | 52456888/G//A      | nonsynonymous | 1 | 0 |
| NISCH    | chr3 | 52525953/G//A      | nonsynonymous | 1 | 0 |
| NT5DC2   | chr3 | 52558701/G//A      | nonsynonymous | 1 | 0 |
| NT5DC2   | chr3 | 52563158/C//T      | synonymous    | 1 | 0 |
| CACNA1D  | chr3 | 53766861/A//G      | synonymous    | 1 | 0 |
| FLNB     | chr3 | 58108948/C//T      | synonymous    | 1 | 0 |
| ROBO1    | chr3 | 78666908/G//A      | nonsynonymous | 1 | 0 |
| DCBLD2   | chr3 | 98568405/T//C      | synonymous    | 1 | 0 |
| USF3     | chr3 | 113378424/T//A     | nonsynonymous | 1 | 0 |
| GPR156   | chr3 | 119886465/A//G     | nonsynonymous | 1 | 0 |

|           |      |                |               |   |   |
|-----------|------|----------------|---------------|---|---|
| ILDR1     | chr3 | 121707170/C//T | synonymous    | 1 | 0 |
| PARP14    | chr3 | 122418965/T//C | nonsynonymous | 1 | 0 |
| MUC13     | chr3 | 124635234/A//G | synonymous    | 1 | 0 |
| PLXNA1    | chr3 | 126730914/T//C | synonymous    | 1 | 0 |
| DNAJB8    | chr3 | 128181453/G//A | synonymous    | 1 | 0 |
| RPN1      | chr3 | 128369394/G//T | nonsynonymous | 1 | 0 |
| H1FOO     | chr3 | 129266245/G//A | nonsynonymous | 1 | 0 |
| P2RY14    | chr3 | 150931533/A//G | nonsynonymous | 1 | 0 |
| RSRC1     | chr3 | 157839961/G//A | nonsynonymous | 1 | 0 |
| GFM1      | chr3 | 158364662/C//T | synonymous    | 1 | 0 |
| SLITRK3   | chr3 | 164906038/G//A | nonsynonymous | 1 | 0 |
| PIK3CA    | chr3 | 178952007/A//G | nonsynonymous | 1 | 0 |
| TTC14     | chr3 | 180322086/A//G | nonsynonymous | 1 | 0 |
|           | chr3 | 183951081/A//G | synonymous    | 1 | 0 |
| PIGG      | chr4 | 517607/G//A    | synonymous    | 1 | 0 |
| CRIPAK    | chr4 | 1389637/G//A   | synonymous    | 1 | 0 |
| FGFR3     | chr4 | 1803556/C//A   | synonymous    | 1 | 0 |
| CFAP99    | chr4 | 2438661/C//T   | nonsynonymous | 1 | 0 |
| CFAP99    | chr4 | 2461810/G//A   | nonsynonymous | 1 | 0 |
| MFSD10    | chr4 | 2934340/C//T   | nonsynonymous | 1 | 0 |
| BOD1L1    | chr4 | 13603250/T//C  | synonymous    | 1 | 0 |
| CLRN2     | chr4 | 17528510/C//T  | synonymous    | 1 | 0 |
| CCDC149   | chr4 | 24810405/G//A  | nonsynonymous | 1 | 0 |
| UGDH      | chr4 | 39501788/G//T  | nonsynonymous | 1 | 0 |
| PHOX2B    | chr4 | 41749414/A//T  | synonymous    | 1 | 0 |
| UBA6      | chr4 | 68488568/C//T  | nonsynonymous | 1 | 0 |
| UBA6      | chr4 | 68530933/C//G  | nonsynonymous | 1 | 0 |
| TMPRSS11D | chr4 | 68698915/G//A  | synonymous    | 1 | 0 |
| ODAM      | chr4 | 71068035/A//T  | nonsynonymous | 1 | 0 |
| AMTN      | chr4 | 71396954/A//G  | nonsynonymous | 1 | 0 |
| COX18     | chr4 | 73935133/C//T  | synonymous    | 1 | 0 |
| SHROOM3   | chr4 | 77675533/G//T  | nonsynonymous | 1 | 0 |
| SEPT11    | chr4 | 77871062/C//A  | synonymous    | 1 | 0 |
| COPS4     | chr4 | 83978544/C//T  | nonsynonymous | 1 | 0 |
| GRID2     | chr4 | 94159544/G//C  | nonsynonymous | 1 | 0 |
| ARHGEF38  | chr4 | 106580459/C//T | synonymous    | 1 | 0 |
| SEC24D    | chr4 | 119661900/G//A | nonsynonymous | 1 | 0 |
| MAML3     | chr4 | 140811552/A//G | synonymous    | 1 | 0 |
| TTC29     | chr4 | 147824706/G//A | synonymous    | 1 | 0 |
| MAB21L2   | chr4 | 151505150/C//T | synonymous    | 1 | 0 |
| FHDC1     | chr4 | 153896654/A//G | synonymous    | 1 | 0 |
| KIAA0922  | chr4 | 154512317/T//C | nonsynonymous | 1 | 0 |
| UBE2QL1   | chr5 | 6449286/C//A   | nonsynonymous | 1 | 0 |
| SEMA5A    | chr5 | 9224811/C//T   | synonymous    | 1 | 0 |
| TRIO      | chr5 | 14462967/T//A  | nonsynonymous | 1 | 0 |
| OTULIN    | chr5 | 14690341/G//A  | nonsynonymous | 1 | 0 |
| CDH10     | chr5 | 24535360/C//T  | nonsynonymous | 1 | 0 |
| GDNF      | chr5 | 37815999/C//CA | nonsynonymous | 1 | 0 |
| EGFLAM    | chr5 | 38407070/C//T  | synonymous    | 1 | 0 |
| HCN1      | chr5 | 45695953/G//A  | synonymous    | 1 | 0 |
| MIER3     | chr5 | 56224635/T//C  | nonsynonymous | 1 | 0 |
| PDE4D     | chr5 | 59189534/G//C  | synonymous    | 1 | 0 |
| IPO11     | chr5 | 61887492/T//C  | nonsynonymous | 1 | 0 |
| SLCO6A1   | chr5 | 101724475/A//G | nonsynonymous | 1 | 0 |
| TSLP      | chr5 | 110411737/C//T | nonsynonymous | 1 | 0 |
| PRDM6     | chr5 | 122426245/G//A | nonsynonymous | 1 | 0 |
| FBN2      | chr5 | 127595357/G//A | synonymous    | 1 | 0 |
| KDM3B     | chr5 | 137756622/T//G | nonsynonymous | 1 | 0 |
| PCDHA5    | chr5 | 140202710/C//T | synonymous    | 1 | 0 |
| PCDHA7    | chr5 | 140215715/C//T | nonsynonymous | 1 | 0 |
| PCDHA11   | chr5 | 140248642/T//C | synonymous    | 1 | 0 |
| PCDHA12   | chr5 | 140257286/C//T | synonymous    | 1 | 0 |
| PCDHB7    | chr5 | 140554409/G//A | nonsynonymous | 1 | 0 |
| PCDHB11   | chr5 | 140579920/C//T | synonymous    | 1 | 0 |
| PCDHGB4   | chr5 | 140769185/C//T | synonymous    | 1 | 0 |
| PCDHGA8   | chr5 | 140772680/G//A | synonymous    | 1 | 0 |
| PCDHGB6   | chr5 | 140788613/C//T | nonsynonymous | 1 | 0 |
| PCDHGB6   | chr5 | 140789295/C//T | nonsynonymous | 1 | 0 |
| C5orf46   | chr5 | 147281224/G//A | synonymous    | 1 | 0 |
| ARSI      | chr5 | 149677184/C//T | nonsynonymous | 1 | 0 |

|          |      |                    |               |   |   |
|----------|------|--------------------|---------------|---|---|
| ANXA6    | chr5 | 150509025/G//A     | synonymous    | 1 | 0 |
| FAT2     | chr5 | 150930198/T//C     | nonsynonymous | 1 | 0 |
| NUDCD2   | chr5 | 162883944/G//T     | nonsynonymous | 1 | 0 |
| SLIT3    | chr5 | 168100254/C//A     | nonsynonymous | 1 | 0 |
| SLIT3    | chr5 | 168151461/C//T     | nonsynonymous | 1 | 0 |
| UNC5A    | chr5 | 176295797/C//T     | nonsynonymous | 1 | 0 |
| FGFR4    | chr5 | 176524664/G//T     | nonsynonymous | 1 | 0 |
| NSD1     | chr5 | 176637095/A//G     | synonymous    | 1 | 0 |
| ZNF354C  | chr5 | 178505998/A//G     | nonsynonymous | 1 | 0 |
| RUFY1    | chr5 | 179020630/T//C     | nonsynonymous | 1 | 0 |
| MGAT4B   | chr5 | 179225383/G//A     | nonsynonymous | 1 | 0 |
| IRF4     | chr6 | 393304/G//A        | nonsynonymous | 1 | 0 |
| HUS1B    | chr6 | 656746/G//A        | nonsynonymous | 1 | 0 |
| RIOK1    | chr6 | 7405163/A//C       | synonymous    | 1 | 0 |
| KIF13A   | chr6 | 17826103/G//A      | nonsynonymous | 1 | 0 |
| DCDC2    | chr6 | 24301956/C//T      | nonsynonymous | 1 | 0 |
| HIST1H3E | chr6 | 26225583/G//A      | synonymous    | 1 | 0 |
| ZNF311   | chr6 | 28967299/A//C      | nonsynonymous | 1 | 0 |
| GABBR1   | chr6 | 29600151/C//T      | synonymous    | 1 | 0 |
| PSORS1C2 | chr6 | 31105788/C//A      | nonsynonymous | 1 | 0 |
| PSORS1C2 | chr6 | 31105852/C//T      | nonsynonymous | 1 | 0 |
| LTB      | chr6 | 31548630/G//A      | synonymous    | 1 | 0 |
| BAG6     | chr6 | 31616682/C//T      | synonymous    | 1 | 0 |
| CLIC1    | chr6 | 31700145/T//C      | nonsynonymous | 1 | 0 |
| EHMT2    | chr6 | 31848026/G//A      | synonymous    | 1 | 0 |
| HSD17B8  | chr6 | 33172677/A//G      | nonsynonymous | 1 | 0 |
| RING1    | chr6 | 33179725/C//T      | synonymous    | 1 | 0 |
| ITPR3    | chr6 | 33654823/G//A      | nonsynonymous | 1 | 0 |
| MTCH1    | chr6 | 36945437/A//G      | nonsynonymous | 1 | 0 |
| NFYA     | chr6 | 41048612/C//T      | synonymous    | 1 | 0 |
| GCM1     | chr6 | 52999058/G//A      | nonsynonymous | 1 | 0 |
| GFRAL    | chr6 | 55192316/C//T      | synonymous    | 1 | 0 |
| DST      | chr6 | 56324972/G//A      | synonymous    | 1 | 0 |
| KIAA1586 | chr6 | 56917664/T//C      | nonsynonymous | 1 | 0 |
| KHDRBS2  | chr6 | 62390854/G//T      | synonymous    | 1 | 0 |
| SMAP1    | chr6 | 71567701/C//T      | synonymous    | 1 | 0 |
| KCNQ5    | chr6 | 73332193/G//A      | synonymous    | 1 | 0 |
| KCNQ5    | chr6 | 73904416/C//T      | nonsynonymous | 1 | 0 |
| ZNF292   | chr6 | 87970160/G//T      | synonymous    | 1 | 0 |
| MDN1     | chr6 | 90466104/G//A      | nonsynonymous | 1 | 0 |
| MAP3K7   | chr6 | 91226119/C//T      | synonymous    | 1 | 0 |
| EPHA7    | chr6 | 93982109/C//A      | nonsynonymous | 1 | 0 |
| MICAL1   | chr6 | 109765958/G//C     | nonsynonymous | 1 | 0 |
| GTF3C6   | chr6 | 111288798/C//T     | synonymous    | 1 | 0 |
| REV3L    | chr6 | 111694065/G//A     | synonymous    | 1 | 0 |
| TCF21    | chr6 | 134210497/G//GTCTC | synonymous    | 1 | 0 |
| UTRN     | chr6 | 145095468/T//A     | nonsynonymous | 1 | 0 |
| FBXO30   | chr6 | 146121277/G//A     | nonsynonymous | 1 | 0 |
| FBXO30   | chr6 | 146127488/G//A     | synonymous    | 1 | 0 |
| SHPRH    | chr6 | 146262903/G//A     | synonymous    | 1 | 0 |
| PLEKHG1  | chr6 | 151055123/C//T     | synonymous    | 1 | 0 |
| SYNE1    | chr6 | 152527420/C//T     | synonymous    | 1 | 0 |
| SYNE1    | chr6 | 152652494/G//A     | synonymous    | 1 | 0 |
| SERAC1   | chr6 | 158549197/G//A     | nonsynonymous | 1 | 0 |
| GTF2H5   | chr6 | 158613095/C//A     | nonsynonymous | 1 | 0 |
| PNLDC1   | chr6 | 160221714/C//T     | synonymous    | 1 | 0 |
| C6orf118 | chr6 | 165715178/G//A     | synonymous    | 1 | 0 |
| AFDN     | chr6 | 168348530/C//T     | synonymous    | 1 | 0 |
| GNA12    | chr7 | 2771274/G//A       | synonymous    | 1 | 0 |
| AP5Z1    | chr7 | 4827933/G//A       | synonymous    | 1 | 0 |
| RBAK     | chr7 | 5104163/A//G       | nonsynonymous | 1 | 0 |
| FBXL18   | chr7 | 5541567/G//A       | synonymous    | 1 | 0 |
| FSCN1    | chr7 | 5643177/T//C       | nonsynonymous | 1 | 0 |
| THSD7A   | chr7 | 11509563/CCTT//C   | nonsynonymous | 1 | 0 |
| HOXA9    | chr7 | 27204717/G//T      | synonymous    | 1 | 0 |
| DPY19L1  | chr7 | 34978931/G//A      | nonsynonymous | 1 | 0 |
| ELMO1    | chr7 | 37382350/G//A      | synonymous    | 1 | 0 |
| VPS41    | chr7 | 38836354/G//A      | synonymous    | 1 | 0 |
| AEBP1    | chr7 | 44151515/T//C      | synonymous    | 1 | 0 |
| ADCY1    | chr7 | 45725723/C//T      | nonsynonymous | 1 | 0 |

|           |      |                 |               |   |   |
|-----------|------|-----------------|---------------|---|---|
| AUTS2     | chr7 | 70252422/G//T   | synonymous    | 1 | 0 |
| CLDN3     | chr7 | 73184298/T//C   | nonsynonymous | 1 | 0 |
| GRM3      | chr7 | 86415798/C//T   | synonymous    | 1 | 0 |
| SAMD9L    | chr7 | 92762645/G//A   | synonymous    | 1 | 0 |
| BAIAP2L1  | chr7 | 97935802/G//A   | nonsynonymous | 1 | 0 |
| STAG3     | chr7 | 99808801/G//A   | nonsynonymous | 1 | 0 |
| GNB2      | chr7 | 100275168/C//T  | synonymous    | 1 | 0 |
| ZAN       | chr7 | 100365467/G//A  | nonsynonymous | 1 | 0 |
| CDHR3     | chr7 | 105660944/C//T  | synonymous    | 1 | 0 |
| NAMPT     | chr7 | 105902034/C//A  | nonsynonymous | 1 | 0 |
| PIK3CG    | chr7 | 106508067/C//T  | nonsynonymous | 1 | 0 |
| PIK3CG    | chr7 | 106523549/G//T  | nonsynonymous | 1 | 0 |
| COG5      | chr7 | 106876918/G//A  | nonsynonymous | 1 | 0 |
| DOCK4     | chr7 | 111430583/C//T  | nonsynonymous | 1 | 0 |
| PTPRZ1    | chr7 | 121695051/C//T  | synonymous    | 1 | 0 |
| TMEM229A  | chr7 | 123672446/C//T  | synonymous    | 1 | 0 |
| FLNC      | chr7 | 128477738/G//A  | nonsynonymous | 1 | 0 |
| BPGM      | chr7 | 134346364/G//A  | nonsynonymous | 1 | 0 |
| KIAA1549  | chr7 | 138546052/C//T  | nonsynonymous | 1 | 0 |
| EPHB6     | chr7 | 142566013/T//C  | nonsynonymous | 1 | 0 |
| TRPV5     | chr7 | 142626135/T//G  | synonymous    | 1 | 0 |
| OR2A25    | chr7 | 143772135/C//T  | synonymous    | 1 | 0 |
| GIMAP7    | chr7 | 150217478/G//A  | nonsynonymous | 1 | 0 |
| SLC4A2    | chr7 | 150771333/G//A  | nonsynonymous | 1 | 0 |
| SLC4A2    | chr7 | 150771522/G//A  | nonsynonymous | 1 | 0 |
| FASTK     | chr7 | 150775740/T//C  | nonsynonymous | 1 | 0 |
| ABCF2     | chr7 | 150921922/C//T  | nonsynonymous | 1 | 0 |
| CHPF2     | chr7 | 150935458/G//A  | synonymous    | 1 | 0 |
| ZNF596    | chr8 | 196305/A//G     | synonymous    | 1 | 0 |
| CLDN23    | chr8 | 8560335/G//A    | nonsynonymous | 1 | 0 |
| MSRA      | chr8 | 10159113/T//C   | nonsynonymous | 1 | 0 |
| BLK       | chr8 | 11400760/G//A   | synonymous    | 1 | 0 |
| FGF20     | chr8 | 16859275/C//T   | synonymous    | 1 | 0 |
| PSD3      | chr8 | 18793584/T//A   | nonsynonymous | 1 | 0 |
| ATP6V1B2  | chr8 | 20072417/G//T   | nonsynonymous | 1 | 0 |
| TNFRSF10A | chr8 | 23054709/T//G   | synonymous    | 1 | 0 |
| LOXL2     | chr8 | 23190928/C//A   | nonsynonymous | 1 | 0 |
| FZD3      | chr8 | 28360385/C//T   | synonymous    | 1 | 0 |
| UBXN8     | chr8 | 30620812/G//A   | nonsynonymous | 1 | 0 |
| UNC5D     | chr8 | 35406823/C//T   | synonymous    | 1 | 0 |
| ZNF703    | chr8 | 37555026/C//T   | nonsynonymous | 1 | 0 |
| ADAM32    | chr8 | 39080734/G//A   | nonsynonymous | 1 | 0 |
| PRKDC     | chr8 | 48691172/G//A   | nonsynonymous | 1 | 0 |
| PRKDC     | chr8 | 48769760/ATC//A | nonsynonymous | 1 | 0 |
| PXDNL     | chr8 | 52321615/C//T   | nonsynonymous | 1 | 0 |
| CYP7B1    | chr8 | 65528557/A//G   | nonsynonymous | 1 | 0 |
| CRISPLD1  | chr8 | 75926256/C//T   | nonsynonymous | 1 | 0 |
| PLEKHF2   | chr8 | 96166751/G//A   | nonsynonymous | 1 | 0 |
| MATN2     | chr8 | 98943567/G//A   | nonsynonymous | 1 | 0 |
| DCAF13    | chr8 | 104432628/CA//C | nonsynonymous | 1 | 0 |
| PKHD1L1   | chr8 | 110457292/C//T  | nonsynonymous | 1 | 0 |
| ENPP2     | chr8 | 120638874/G//A  | nonsynonymous | 1 | 0 |
| ZHX2      | chr8 | 123966105/C//T  | synonymous    | 1 | 0 |
| TMEM65    | chr8 | 125339630/A//G  | nonsynonymous | 1 | 0 |
| TG        | chr8 | 133918958/C//T  | synonymous    | 1 | 0 |
| ADGRB1    | chr8 | 143623568/A//G  | nonsynonymous | 1 | 0 |
| ARC       | chr8 | 143694798/G//T  | nonsynonymous | 1 | 0 |
| ARC       | chr8 | 143695069/G//A  | synonymous    | 1 | 0 |
| PARP10    | chr8 | 145051805/G//A  | synonymous    | 1 | 0 |
| FBXL6     | chr8 | 145579840/C//T  | synonymous    | 1 | 0 |
| RECQL4    | chr8 | 145739084/G//A  | synonymous    | 1 | 0 |
| LRRCL4    | chr8 | 145746161/G//A  | nonsynonymous | 1 | 0 |
| ZNF34     | chr8 | 145998644/G//A  | synonymous    | 1 | 0 |
| PUM3      | chr9 | 2837263/C//A    | nonsynonymous | 1 | 0 |
| RIC1      | chr9 | 5732441/A//G    | synonymous    | 1 | 0 |
| PTPRD     | chr9 | 8500774/A//G    | nonsynonymous | 1 | 0 |
| KLHL9     | chr9 | 21333243/C//T   | nonsynonymous | 1 | 0 |
| DNAI1     | chr9 | 34514385/C//A   | synonymous    | 1 | 0 |
| TPM2      | chr9 | 35685714/C//A   | nonsynonymous | 1 | 0 |
| ZCCHC7    | chr9 | 37304314/C//T   | synonymous    | 1 | 0 |

|             |       |                  |               |   |   |
|-------------|-------|------------------|---------------|---|---|
|             | chr9  | 37592392/G//T    | synonymous    | 1 | 0 |
| TJP2        | chr9  | 71869274/G//A    | nonsynonymous | 1 | 0 |
| APBA1       | chr9  | 72131117/C//T    | nonsynonymous | 1 | 0 |
| APBA1       | chr9  | 72131845/G//A    | synonymous    | 1 | 0 |
| TRPM3       | chr9  | 73152232/G//A    | nonsynonymous | 1 | 0 |
| VPS13A      | chr9  | 79891080/G//A    | nonsynonymous | 1 | 0 |
| RASEF       | chr9  | 85622344/G//A    | synonymous    | 1 | 0 |
| DAPK1       | chr9  | 90254311/C//T    | nonsynonymous | 1 | 0 |
| SPATA31E1   | chr9  | 90502800/G//A    | nonsynonymous | 1 | 0 |
| C9orf47     | chr9  | 91605924/G//T    | nonsynonymous | 1 | 0 |
|             | chr9  | 95477424/G//A    | synonymous    | 1 | 0 |
| PHF2        | chr9  | 96439054/C//T    | nonsynonymous | 1 | 0 |
| COL15A1     | chr9  | 101824293/C//T   | nonsynonymous | 1 | 0 |
| RNF20       | chr9  | 104302910/C//CGA | nonsynonymous | 1 | 0 |
| PALM2-AKAP2 | chr9  | 112542757/C//T   | synonymous    | 1 | 0 |
| KIAA0368    | chr9  | 114140900/A//G   | nonsynonymous | 1 | 0 |
| FKBP15      | chr9  | 115938956/G//A   | synonymous    | 1 | 0 |
| COL27A1     | chr9  | 117005815/G//A   | nonsynonymous | 1 | 0 |
| PAPPA       | chr9  | 118950361/C//T   | synonymous    | 1 | 0 |
| ASTN2       | chr9  | 119976939/C//T   | nonsynonymous | 1 | 0 |
| BRINP1      | chr9  | 121930339/C//T   | nonsynonymous | 1 | 0 |
| TRAF1       | chr9  | 123675634/C//T   | nonsynonymous | 1 | 0 |
| CNTRL       | chr9  | 123930567/G//A   | nonsynonymous | 1 | 0 |
| DAB2IP      | chr9  | 124545883/G//A   | synonymous    | 1 | 0 |
| LHX2        | chr9  | 126777612/G//A   | nonsynonymous | 1 | 0 |
| ARPC5L      | chr9  | 127636006/G//A   | nonsynonymous | 1 | 0 |
| ZBTB43      | chr9  | 129595364/C//T   | synonymous    | 1 | 0 |
| URM1        | chr9  | 131152007/C//T   | synonymous    | 1 | 0 |
| DOLK        | chr9  | 131708453/C//T   | nonsynonymous | 1 | 0 |
| PTPA        | chr9  | 131890299/C//T   | synonymous    | 1 | 0 |
| RAPGEF1     | chr9  | 134455722/T//C   | nonsynonymous | 1 | 0 |
| NTNG2       | chr9  | 135073572/C//T   | nonsynonymous | 1 | 0 |
| SARDH       | chr9  | 136599036/T//C   | nonsynonymous | 1 | 0 |
| OLFM1       | chr9  | 138011815/G//A   | nonsynonymous | 1 | 0 |
| KCNT1       | chr9  | 138664620/G//A   | nonsynonymous | 1 | 0 |
| SEC16A      | chr9  | 139370287/G//A   | nonsynonymous | 1 | 0 |
| NOTCH1      | chr9  | 139401003/G//A   | synonymous    | 1 | 0 |
| NOTCH1      | chr9  | 139401089/G//A   | nonsynonymous | 1 | 0 |
| FBXW5       | chr9  | 139835485/G//A   | synonymous    | 1 | 0 |
| C8G         | chr9  | 139839792/C//T   | nonsynonymous | 1 | 0 |
| NPDC1       | chr9  | 139934854/A//G   | nonsynonymous | 1 | 0 |
| ARRDC1      | chr9  | 140509520/C//T   | synonymous    | 1 | 0 |
| LARP4B      | chr10 | 858884/G//A      | synonymous    | 1 | 0 |
| LARP4B      | chr10 | 859077/TG//T     | nonsynonymous | 1 | 0 |
| PITRM1      | chr10 | 3207620/C//T     | nonsynonymous | 1 | 0 |
| TUBAL3      | chr10 | 5437426/G//A     | nonsynonymous | 1 | 0 |
| FBXO18      | chr10 | 5953056/C//T     | synonymous    | 1 | 0 |
| ITIH5       | chr10 | 7605068/G//A     | nonsynonymous | 1 | 0 |
| UPF2        | chr10 | 11963304/C//T    | nonsynonymous | 1 | 0 |
| SEPHS1      | chr10 | 13364974/C//T    | synonymous    | 1 | 0 |
| SUV39H2     | chr10 | 14941597/G//A    | synonymous    | 1 | 0 |
| VIM         | chr10 | 17271347/G//A    | synonymous    | 1 | 0 |
| MLLT10      | chr10 | 21823613/G//A    | nonsynonymous | 1 | 0 |
| ARHGAP21    | chr10 | 24886483/C//T    | nonsynonymous | 1 | 0 |
| ABI1        | chr10 | 27149712/A//G    | synonymous    | 1 | 0 |
| PTCHD3      | chr10 | 27702994/C//T    | synonymous    | 1 | 0 |
| ZNF438      | chr10 | 31139161/C//T    | nonsynonymous | 1 | 0 |
| RET         | chr10 | 43612056/C//T    | nonsynonymous | 1 | 0 |
| RBP3        | chr10 | 48390151/C//T    | nonsynonymous | 1 | 0 |
| H2AFY2      | chr10 | 71851605/G//A    | synonymous    | 1 | 0 |
| PPA1        | chr10 | 71978523/C//A    | nonsynonymous | 1 | 0 |
| C10orf11    | chr10 | 77818442/G//A    | synonymous    | 1 | 0 |
| KCNMA1      | chr10 | 78709021/G//A    | nonsynonymous | 1 | 0 |
| LRIT1       | chr10 | 85991863/G//T    | synonymous    | 1 | 0 |
| IFIT5       | chr10 | 91177797/ACTT//A | nonsynonymous | 1 | 0 |
| PLCE1       | chr10 | 95892086/C//T    | synonymous    | 1 | 0 |
| HELLS       | chr10 | 96350209/C//T    | nonsynonymous | 1 | 0 |
| SLIT1       | chr10 | 98761002/G//A    | nonsynonymous | 1 | 0 |
| RRP12       | chr10 | 99150504/G//T    | nonsynonymous | 1 | 0 |
| ABCC2       | chr10 | 101560169/G//A   | nonsynonymous | 1 | 0 |

|          |       |                   |               |   |   |
|----------|-------|-------------------|---------------|---|---|
| GBF1     | chr10 | 104019816/C//T    | nonsynonymous | 1 | 0 |
| COL17A1  | chr10 | 105821178/C//T    | nonsynonymous | 1 | 0 |
| SORCS3   | chr10 | 106926988/A//ATTG | synonymous    | 1 | 0 |
| SORCS1   | chr10 | 108924007/C//T    | nonsynonymous | 1 | 0 |
| TRUB1    | chr10 | 116731937/A//G    | nonsynonymous | 1 | 0 |
| STK32C   | chr10 | 134041593/C//T    | nonsynonymous | 1 | 0 |
| TUBGCP2  | chr10 | 135103461/G//A    | synonymous    | 1 | 0 |
| PKP3     | chr11 | 397420/C//T       | nonsynonymous | 1 | 0 |
| PKP3     | chr11 | 404597/G//A       | synonymous    | 1 | 0 |
| AP2A2    | chr11 | 994183/C//T       | nonsynonymous | 1 | 0 |
| MUC5B    | chr11 | 1281870/C//T      | nonsynonymous | 1 | 0 |
|          | chr11 | 1507749/G//A      | synonymous    | 1 | 0 |
| OR52I1   | chr11 | 4615644/C//T      | nonsynonymous | 1 | 0 |
| OR52N2   | chr11 | 5841861/G//A      | nonsynonymous | 1 | 0 |
|          | chr11 | 6413410/A//G      | synonymous    | 1 | 0 |
| TRIM3    | chr11 | 6478033/G//A      | nonsynonymous | 1 | 0 |
| TRIM3    | chr11 | 6478232/G//A      | nonsynonymous | 1 | 0 |
| ZNF215   | chr11 | 6977466/A//G      | nonsynonymous | 1 | 0 |
| ZNF214   | chr11 | 7021162/G//A      | synonymous    | 1 | 0 |
| TUB      | chr11 | 8111175/C//T      | synonymous    | 1 | 0 |
| STK33    | chr11 | 8413932/C//T      | synonymous    | 1 | 0 |
| AMPD3    | chr11 | 10500123/C//T     | nonsynonymous | 1 | 0 |
| MRVI1    | chr11 | 10647725/G//A     | nonsynonymous | 1 | 0 |
| MICAL2   | chr11 | 12225989/T//G     | nonsynonymous | 1 | 0 |
| MICAL2   | chr11 | 12280095/CAA//C   | nonsynonymous | 1 | 0 |
| CYP2R1   | chr11 | 14900968/T//C     | nonsynonymous | 1 | 0 |
| SOX6     | chr11 | 15994483/C//T     | nonsynonymous | 1 | 0 |
| LDHAL6A  | chr11 | 18499264/G//T     | nonsynonymous | 1 | 0 |
| MRGPRX1  | chr11 | 18956155/G//A     | synonymous    | 1 | 0 |
| ZDHHC13  | chr11 | 19194340/C//T     | nonsynonymous | 1 | 0 |
| DEPDC7   | chr11 | 33050316/C//A     | nonsynonymous | 1 | 0 |
| APIP     | chr11 | 34937823/G//A     | synonymous    | 1 | 0 |
| ALKBH3   | chr11 | 43911301/A//T     | nonsynonymous | 1 | 0 |
| PACSIN3  | chr11 | 47204043/C//T     | nonsynonymous | 1 | 0 |
| FOLH1    | chr11 | 49196466/A//G     | synonymous    | 1 | 0 |
| OR4C13   | chr11 | 49974299/G//A     | nonsynonymous | 1 | 0 |
| OR8U8    | chr11 | 56143125/C//T     | nonsynonymous | 1 | 0 |
| VWCE     | chr11 | 61042027/C//T     | nonsynonymous | 1 | 0 |
| PPP1R32  | chr11 | 61252271/C//T     | nonsynonymous | 1 | 0 |
| METTL12  | chr11 | 62434856/G//A     | synonymous    | 1 | 0 |
| FLRT1    | chr11 | 63884457/G//A     | nonsynonymous | 1 | 0 |
| ESRRA    | chr11 | 64082287/G//A     | nonsynonymous | 1 | 0 |
| ZFPL1    | chr11 | 64855516/G//A     | nonsynonymous | 1 | 0 |
| CAPN1    | chr11 | 64978746/A//G     | nonsynonymous | 1 | 0 |
| SNX32    | chr11 | 65617637/C//T     | nonsynonymous | 1 | 0 |
| LRFN4    | chr11 | 66626391/C//T     | synonymous    | 1 | 0 |
| PITPNM1  | chr11 | 67267252/C//T     | nonsynonymous | 1 | 0 |
| ARHGEF17 | chr11 | 73073129/G//A     | synonymous    | 1 | 0 |
| UCP2     | chr11 | 73687954/C//T     | nonsynonymous | 1 | 0 |
| LRRC32   | chr11 | 76371063/C//T     | nonsynonymous | 1 | 0 |
| TENM4    | chr11 | 78381064/C//T     | nonsynonymous | 1 | 0 |
| DLG2     | chr11 | 83770417/C//T     | nonsynonymous | 1 | 0 |
| TYR      | chr11 | 88911457/C//T     | synonymous    | 1 | 0 |
| NAALAD2  | chr11 | 89896599/T//C     | nonsynonymous | 1 | 0 |
| FUT4     | chr11 | 94277373/A//T     | nonsynonymous | 1 | 0 |
| CNTN5    | chr11 | 99786867/C//T     | nonsynonymous | 1 | 0 |
| AASDHPPT | chr11 | 105965377/A//G    | nonsynonymous | 1 | 0 |
| C11orf65 | chr11 | 108277545/T//C    | nonsynonymous | 1 | 0 |
| C11orf87 | chr11 | 109294708/C//T    | nonsynonymous | 1 | 0 |
| PPP2R1B  | chr11 | 111631645/C//T    | nonsynonymous | 1 | 0 |
| PLET1    | chr11 | 112126197/C//T    | synonymous    | 1 | 0 |
| NCAM1    | chr11 | 113076266/C//T    | nonsynonymous | 1 | 0 |
| UBE4A    | chr11 | 118244312/C//T    | nonsynonymous | 1 | 0 |
| DDX6     | chr11 | 118650364/A//G    | nonsynonymous | 1 | 0 |
| BCL9L    | chr11 | 118773232/C//T    | nonsynonymous | 1 | 0 |
| USP2     | chr11 | 119243468/C//A    | nonsynonymous | 1 | 0 |
| HEPACAM  | chr11 | 124794672/T//C    | nonsynonymous | 1 | 0 |
| PKNOX2   | chr11 | 125299986/G//A    | nonsynonymous | 1 | 0 |
| CHEK1    | chr11 | 125499144/C//T    | nonsynonymous | 1 | 0 |
| GLB1L3   | chr11 | 134151921/C//T    | nonsynonymous | 1 | 0 |

|          |       |                            |               |   |   |
|----------|-------|----------------------------|---------------|---|---|
| IQSEC3   | chr12 | 248095/C//T                | synonymous    | 1 | 0 |
|          | chr12 | 977855/G//A                | synonymous    | 1 | 0 |
| DCP1B    | chr12 | 2058396/G//A               | synonymous    | 1 | 0 |
| CACNA1C  | chr12 | 2705034/G//A               | synonymous    | 1 | 0 |
| VWF      | chr12 | 6058291/G//A               | nonsynonymous | 1 | 0 |
| CHD4     | chr12 | 6680061/G//A               | nonsynonymous | 1 | 0 |
| LPAR5    | chr12 | 6730016/C//A               | synonymous    | 1 | 0 |
| DPPA3    | chr12 | 7868009/G//A               | nonsynonymous | 1 | 0 |
| FAM90A1  | chr12 | 8377454/C//T               | synonymous    | 1 | 0 |
| KLRG1    | chr12 | 9147747/A//G               | nonsynonymous | 1 | 0 |
| TAS2R50  | chr12 | 11139130/A//C              | nonsynonymous | 1 | 0 |
| GRIN2B   | chr12 | 13715819/C//A              | nonsynonymous | 1 | 0 |
| ABCC9    | chr12 | 22065878/A//G              | synonymous    | 1 | 0 |
| OVCH1    | chr12 | 29596370/C//T              | synonymous    | 1 | 0 |
| KIAA1551 | chr12 | 32134815/G//A              | nonsynonymous | 1 | 0 |
| PKP2     | chr12 | 33030886/C//T              | nonsynonymous | 1 | 0 |
| ADAMTS20 | chr12 | 43925860/G//A              | synonymous    | 1 | 0 |
| DBX2     | chr12 | 45444525/C//T              | synonymous    | 1 | 0 |
| VDR      | chr12 | 48251296/G//A              | synonymous    | 1 | 0 |
| VDR      | chr12 | 48251318/T//C              | nonsynonymous | 1 | 0 |
| KMT2D    | chr12 | 49438647/G//A              | nonsynonymous | 1 | 0 |
| PRPF40B  | chr12 | 50027752/C//T              | nonsynonymous | 1 | 0 |
| LARP4    | chr12 | 50867293/A//G              | synonymous    | 1 | 0 |
| KRT71    | chr12 | 52941744/G//A              | nonsynonymous | 1 | 0 |
| KRT4     | chr12 | 53207592/C//CCACCAGTGCCGA/ | nonsynonymous | 1 | 0 |
| TNS2     | chr12 | 53453144/C//T              | synonymous    | 1 | 0 |
| PCBP2    | chr12 | 53874909/GTA//G            | synonymous    | 1 | 0 |
| NPFF     | chr12 | 53900671/G//A              | synonymous    | 1 | 0 |
| HOXC10   | chr12 | 54379463/G//A              | synonymous    | 1 | 0 |
| ITGA7    | chr12 | 56089360/A//G              | nonsynonymous | 1 | 0 |
| DGKA     | chr12 | 56332316/C//T              | nonsynonymous | 1 | 0 |
| LRP1     | chr12 | 57600350/G//T              | nonsynonymous | 1 | 0 |
| SLC16A7  | chr12 | 60169201/C//T              | synonymous    | 1 | 0 |
| C12orf66 | chr12 | 64609539/T//C              | nonsynonymous | 1 | 0 |
| THAP2    | chr12 | 72070679/C//T              | nonsynonymous | 1 | 0 |
| TPH2     | chr12 | 72372867/C//T              | nonsynonymous | 1 | 0 |
| LUM      | chr12 | 91498015/C//T              | nonsynonymous | 1 | 0 |
| FGD6     | chr12 | 95602654/G//A              | synonymous    | 1 | 0 |
| UTP20    | chr12 | 101728224/A//C             | nonsynonymous | 1 | 0 |
| STAB2    | chr12 | 104157343/G//A             | nonsynonymous | 1 | 0 |
| SVOP     | chr12 | 109313446/C//T             | synonymous    | 1 | 0 |
| ACACB    | chr12 | 109665250/C//T             | synonymous    | 1 | 0 |
| PPTC7    | chr12 | 111020850/C//G             | synonymous    | 1 | 0 |
| CUX2     | chr12 | 111779832/G//A             | nonsynonymous | 1 | 0 |
| ACAD10   | chr12 | 112185167/C//T             | synonymous    | 1 | 0 |
| HECTD4   | chr12 | 112645735/G//A             | nonsynonymous | 1 | 0 |
| RPH3A    | chr12 | 113313513/G//A             | nonsynonymous | 1 | 0 |
| OAS3     | chr12 | 113405292/C//T             | nonsynonymous | 1 | 0 |
| SLC8B1   | chr12 | 113758716/C//T             | synonymous    | 1 | 0 |
| TBX5     | chr12 | 114841611/C//T             | synonymous    | 1 | 0 |
| TBX3     | chr12 | 115112047/C//T             | nonsynonymous | 1 | 0 |
| NOS1     | chr12 | 117768312/G//A             | nonsynonymous | 1 | 0 |
| TAOK3    | chr12 | 118598162/G//A             | nonsynonymous | 1 | 0 |
| GCN1     | chr12 | 120599816/C//T             | nonsynonymous | 1 | 0 |
| RHOF     | chr12 | 122217439/G//A             | nonsynonymous | 1 | 0 |
| RSRC2    | chr12 | 122990128/TTG//T           | nonsynonymous | 1 | 0 |
| DNAH10   | chr12 | 124323216/G//A             | nonsynonymous | 1 | 0 |
| TMEM132C | chr12 | 128900017/C//T             | nonsynonymous | 1 | 0 |
| GOLGA3   | chr12 | 133373261/G//A             | nonsynonymous | 1 | 0 |
| MRPL57   | chr13 | 21750479/C//A              | synonymous    | 1 | 0 |
| NAA16    | chr13 | 41943362/A//T              | nonsynonymous | 1 | 0 |
| RGCC     | chr13 | 42031789/G//A              | synonymous    | 1 | 0 |
| TSC22D1  | chr13 | 45147467/C//T              | nonsynonymous | 1 | 0 |
| TRIM13   | chr13 | 50586337/C//G              | nonsynonymous | 1 | 0 |
| KLHL1    | chr13 | 70681704/C//G              | nonsynonymous | 1 | 0 |
| PIBF1    | chr13 | 73482668/G//T              | nonsynonymous | 1 | 0 |
| RNF113B  | chr13 | 98829292/G//A              | nonsynonymous | 1 | 0 |
| FARP1    | chr13 | 99093033/CG//C             | nonsynonymous | 1 | 0 |
| NALCN    | chr13 | 101742321/C//T             | synonymous    | 1 | 0 |
| MYO16    | chr13 | 109318317/C//T             | nonsynonymous | 1 | 0 |

|          |       |                  |               |   |   |
|----------|-------|------------------|---------------|---|---|
| ADPRHL1  | chr13 | 114077173/G//A   | synonymous    | 1 | 0 |
| TMCO3    | chr13 | 114150011/C//T   | nonsynonymous | 1 | 0 |
| TFDP1    | chr13 | 114285960/C//T   | nonsynonymous | 1 | 0 |
| OR4N2    | chr14 | 20295777/C//T    | nonsynonymous | 1 | 0 |
| SUPT16H  | chr14 | 21825476/C//T    | nonsynonymous | 1 | 0 |
| MYH7     | chr14 | 23885391/C//T    | nonsynonymous | 1 | 0 |
| MYH7     | chr14 | 23899118/G//A    | nonsynonymous | 1 | 0 |
| JPH4     | chr14 | 24045579/G//A    | nonsynonymous | 1 | 0 |
| DHRS4    | chr14 | 24424359/A//G    | nonsynonymous | 1 | 0 |
| DCAF11   | chr14 | 24590580/G//A    | nonsynonymous | 1 | 0 |
| HECTD1   | chr14 | 31598407/G//A    | synonymous    | 1 | 0 |
| RALGAPA1 | chr14 | 36097007/T//C    | nonsynonymous | 1 | 0 |
| SEC23A   | chr14 | 39554964/A//G    | nonsynonymous | 1 | 0 |
| RPL10L   | chr14 | 47120649/G//T    | synonymous    | 1 | 0 |
| SAV1     | chr14 | 51132309/A//G    | synonymous    | 1 | 0 |
| NIN      | chr14 | 51223733/C//T    | nonsynonymous | 1 | 0 |
| TMEM260  | chr14 | 57052566/G//A    | nonsynonymous | 1 | 0 |
| NAA30    | chr14 | 57866596/G//A    | nonsynonymous | 1 | 0 |
| FAM71D   | chr14 | 67669979/TCTC//T | nonsynonymous | 1 | 0 |
| ADAM20   | chr14 | 70991442/C//T    | synonymous    | 1 | 0 |
| POMT2    | chr14 | 77745130/G//A    | synonymous    | 1 | 0 |
| GSTZ1    | chr14 | 77791259/G//A    | nonsynonymous | 1 | 0 |
| TTC8     | chr14 | 89336481/G//A    | nonsynonymous | 1 | 0 |
| UNC79    | chr14 | 94088466/C//T    | synonymous    | 1 | 0 |
| SLC25A47 | chr14 | 100795149/C//A   | synonymous    | 1 | 0 |
| CDC42BPB | chr14 | 103440469/G//A   | nonsynonymous | 1 | 0 |
| EIF5     | chr14 | 103805657/G//A   | nonsynonymous | 1 | 0 |
| BAG5     | chr14 | 104026517/G//A   | nonsynonymous | 1 | 0 |
|          | chr14 | 104151375/T//C   | synonymous    | 1 | 0 |
| PPP1R13B | chr14 | 104216205/G//A   | nonsynonymous | 1 | 0 |
| ADSSL1   | chr14 | 105209481/C//T   | synonymous    | 1 | 0 |
| CEP170B  | chr14 | 105350422/C//T   | nonsynonymous | 1 | 0 |
|          | chr15 | 26874149/A//AT   | synonymous    | 1 | 0 |
| NSMCE3   | chr15 | 29560916/G//A    | synonymous    | 1 | 0 |
| FAN1     | chr15 | 31200356/C//T    | nonsynonymous | 1 | 0 |
| TRPM1    | chr15 | 31352774/C//T    | synonymous    | 1 | 0 |
| THBS1    | chr15 | 39882019/G//A    | nonsynonymous | 1 | 0 |
| C15orf52 | chr15 | 40631790/G//A    | nonsynonymous | 1 | 0 |
| KNL1     | chr15 | 40949602/A//T    | nonsynonymous | 1 | 0 |
| EHD4     | chr15 | 42211695/G//A    | nonsynonymous | 1 | 0 |
| PLA2G4F  | chr15 | 42446415/C//T    | nonsynonymous | 1 | 0 |
| CDAN1    | chr15 | 43020434/G//A    | nonsynonymous | 1 | 0 |
| CGNL1    | chr15 | 57731224/C//T    | nonsynonymous | 1 | 0 |
| HERC1    | chr15 | 63946430/C//T    | nonsynonymous | 1 | 0 |
| CILP     | chr15 | 65489551/C//T    | nonsynonymous | 1 | 0 |
| TLE3     | chr15 | 70358456/T//C    | synonymous    | 1 | 0 |
|          | chr15 | 74501851/CA//C   | synonymous    | 1 | 0 |
| CLK3     | chr15 | 74920957/C//T    | nonsynonymous | 1 | 0 |
| COMMD4   | chr15 | 75631682/C//T    | nonsynonymous | 1 | 0 |
| MAN2C1   | chr15 | 75655033/C//T    | nonsynonymous | 1 | 0 |
| ANKRD34C | chr15 | 79586549/C//G    | nonsynonymous | 1 | 0 |
| SLC28A1  | chr15 | 85487883/G//A    | nonsynonymous | 1 | 0 |
| PDE8A    | chr15 | 85652353/C//T    | nonsynonymous | 1 | 0 |
| MFGE8    | chr15 | 89442687/C//T    | nonsynonymous | 1 | 0 |
| CRTC3    | chr15 | 91073394/C//A    | synonymous    | 1 | 0 |
| LINS1    | chr15 | 101115224/T//C   | nonsynonymous | 1 | 0 |
| RHBDF1   | chr16 | 111928/G//A      | nonsynonymous | 1 | 0 |
| LUC7L    | chr16 | 240066/C//T      | nonsynonymous | 1 | 0 |
|          | chr16 | 319611/A//G      | synonymous    | 1 | 0 |
| BAIAP3   | chr16 | 1392906/T//C     | synonymous    | 1 | 0 |
| IFT140   | chr16 | 1573890/G//A     | nonsynonymous | 1 | 0 |
| CCNF     | chr16 | 2507097/C//T     | synonymous    | 1 | 0 |
| ZSCAN10  | chr16 | 3142063/G//T     | synonymous    | 1 | 0 |
| NAA60    | chr16 | 3533547/C//T     | synonymous    | 1 | 0 |
| CREBBP   | chr16 | 3843460/C//T     | synonymous    | 1 | 0 |
| C16orf71 | chr16 | 4787802/C//T     | nonsynonymous | 1 | 0 |
|          | chr16 | 10855356/C//T    | synonymous    | 1 | 0 |
| GSPT1    | chr16 | 11988819/T//C    | synonymous    | 1 | 0 |
| GSPT1    | chr16 | 11990538/G//A    | nonsynonymous | 1 | 0 |
| SNX29    | chr16 | 12662508/G//T    | synonymous    | 1 | 0 |



|          |       |                  |               |   |   |
|----------|-------|------------------|---------------|---|---|
| SHISA9   | chr16 | 13328918/G//T    | nonsynonymous | 1 | 0 |
| NDE1     | chr16 | 15785111/G//A    | nonsynonymous | 1 | 0 |
| ABCC6    | chr16 | 16248755/C//T    | nonsynonymous | 1 | 0 |
| ERN2     | chr16 | 23702482/C//T    | nonsynonymous | 1 | 0 |
| ATP2A1   | chr16 | 28898821/C//T    | nonsynonymous | 1 | 0 |
| KCTD13   | chr16 | 29918231/C//T    | nonsynonymous | 1 | 0 |
| HIRIP3   | chr16 | 30006878/C//A    | nonsynonymous | 1 | 0 |
| FBRS     | chr16 | 30680555/C//T    | synonymous    | 1 | 0 |
| SRCAP    | chr16 | 30744736/G//A    | nonsynonymous | 1 | 0 |
| ZNF668   | chr16 | 31072779/A//G    | synonymous    | 1 | 0 |
| KAT8     | chr16 | 31139397/C//A    | synonymous    | 1 | 0 |
| ITFG1    | chr16 | 47195698/G//T    | nonsynonymous | 1 | 0 |
| PHKB     | chr16 | 47732398/G//A    | nonsynonymous | 1 | 0 |
| N4BP1    | chr16 | 48595606/C//A    | nonsynonymous | 1 | 0 |
| SALL1    | chr16 | 51175656/G//A    | synonymous    | 1 | 0 |
| AMFR     | chr16 | 56396748/C//T    | synonymous    | 1 | 0 |
| SLC12A3  | chr16 | 56916364/C//T    | nonsynonymous | 1 | 0 |
| RSPRY1   | chr16 | 57242022/G//T    | nonsynonymous | 1 | 0 |
| GOT2     | chr16 | 58743402/C//A    | nonsynonymous | 1 | 0 |
| DYNC1LI2 | chr16 | 66761662/C//T    | nonsynonymous | 1 | 0 |
| ATP6V0D1 | chr16 | 67472364/G//A    | synonymous    | 1 | 0 |
| ATP6V0D1 | chr16 | 67472376/G//A    | synonymous    | 1 | 0 |
| CARMIL2  | chr16 | 67691181/G//A    | nonsynonymous | 1 | 0 |
| SLC7A6   | chr16 | 68321751/T//C    | nonsynonymous | 1 | 0 |
| CYB5B    | chr16 | 69482040/G//A    | nonsynonymous | 1 | 0 |
| WWOX     | chr16 | 78458783/G//T    | nonsynonymous | 1 | 0 |
| TAF1C    | chr16 | 84215485/A//C    | nonsynonymous | 1 | 0 |
| FBXO31   | chr16 | 87367769/G//A    | nonsynonymous | 1 | 0 |
| ZNF469   | chr16 | 88505632/G//A    | synonymous    | 1 | 0 |
| CTU2     | chr16 | 88781021/ACCT//A | nonsynonymous | 1 | 0 |
| MC1R     | chr16 | 89986149/G//A    | synonymous    | 1 | 0 |
| CLUH     | chr17 | 2593725/G//T     | synonymous    | 1 | 0 |
| CLUH     | chr17 | 2605316/G//A     | nonsynonymous | 1 | 0 |
| ATP2A3   | chr17 | 3850810/G//A     | nonsynonymous | 1 | 0 |
| ANKFY1   | chr17 | 4075870/C//T     | synonymous    | 1 | 0 |
| SPNS2    | chr17 | 4436596/G//A     | nonsynonymous | 1 | 0 |
| SLC16A11 | chr17 | 6945391/G//A     | synonymous    | 1 | 0 |
| CLDN7    | chr17 | 7163799/A//G     | nonsynonymous | 1 | 0 |
| C17orf74 | chr17 | 7329693/G//A     | nonsynonymous | 1 | 0 |
| SLC35G6  | chr17 | 7385571/C//T     | nonsynonymous | 1 | 0 |
| ATP1B2   | chr17 | 7558878/G//A     | nonsynonymous | 1 | 0 |
| TP53     | chr17 | 7577139/G//A     | nonsynonymous | 1 | 0 |
| WRAP53   | chr17 | 7606652/G//A     | nonsynonymous | 1 | 0 |
| PER1     | chr17 | 8050655/G//A     | synonymous    | 1 | 0 |
| BORCS6   | chr17 | 8092761/G//T     | nonsynonymous | 1 | 0 |
| MYH13    | chr17 | 10214508/G//A    | nonsynonymous | 1 | 0 |
| MYH13    | chr17 | 10247249/C//T    | nonsynonymous | 1 | 0 |
| MYH3     | chr17 | 10541679/C//T    | nonsynonymous | 1 | 0 |
| MYH3     | chr17 | 10541714/C//T    | synonymous    | 1 | 0 |
| MYH3     | chr17 | 10542915/C//T    | nonsynonymous | 1 | 0 |
| SCO1     | chr17 | 10600618/A//C    | synonymous    | 1 | 0 |
| DNAH9    | chr17 | 11645592/ACT//A  | nonsynonymous | 1 | 0 |
| RAI1     | chr17 | 17698713/G//T    | synonymous    | 1 | 0 |
| RAI1     | chr17 | 17699465/C//T    | nonsynonymous | 1 | 0 |
| SLC5A10  | chr17 | 18922740/G//A    | nonsynonymous | 1 | 0 |
| EPN2     | chr17 | 19237285/G//A    | synonymous    | 1 | 0 |
| UNC119   | chr17 | 26874353/G//A    | nonsynonymous | 1 | 0 |
| SGK494   | chr17 | 26938421/G//A    | nonsynonymous | 1 | 0 |
| CRYBA1   | chr17 | 27577319/G//A    | nonsynonymous | 1 | 0 |
| C17orf75 | chr17 | 30661534/A//G    | synonymous    | 1 | 0 |
| C17orf75 | chr17 | 30669185/T//C    | synonymous    | 1 | 0 |
| TMEM132E | chr17 | 32953699/G//A    | synonymous    | 1 | 0 |
| TMEM132E | chr17 | 32955640/C//T    | nonsynonymous | 1 | 0 |
| ARHGAP23 | chr17 | 36623380/G//A    | nonsynonymous | 1 | 0 |
| GSDMA    | chr17 | 38122558/C//T    | nonsynonymous | 1 | 0 |
| WIPF2    | chr17 | 38421186/C//T    | nonsynonymous | 1 | 0 |
| KRT23    | chr17 | 39081703/G//A    | nonsynonymous | 1 | 0 |
| KRT40    | chr17 | 39135115/C//A    | nonsynonymous | 1 | 0 |
| KRT33B   | chr17 | 39521211/C//T    | nonsynonymous | 1 | 0 |
| DHX58    | chr17 | 40263421/G//A    | nonsynonymous | 1 | 0 |

|          |       |                  |               |   |   |
|----------|-------|------------------|---------------|---|---|
| NAGLU    | chr17 | 40696205/CAAG//C | nonsynonymous | 1 | 0 |
| MLX      | chr17 | 40723674/G//A    | synonymous    | 1 | 0 |
| AOC2     | chr17 | 40997089/G//A    | nonsynonymous | 1 | 0 |
| HDAC5    | chr17 | 42162500/G//T    | nonsynonymous | 1 | 0 |
| SPATA32  | chr17 | 43331872/G//A    | nonsynonymous | 1 | 0 |
| NPEPPS   | chr17 | 45682757/A//G    | nonsynonymous | 1 | 0 |
| TAC4     | chr17 | 47918950/G//A    | synonymous    | 1 | 0 |
| EME1     | chr17 | 48456881/C//T    | synonymous    | 1 | 0 |
| RSAD1    | chr17 | 48562235/T//C    | synonymous    | 1 | 0 |
| CACNA1G  | chr17 | 48683279/C//T    | synonymous    | 1 | 0 |
| VEZF1    | chr17 | 56056607/C//T    | synonymous    | 1 | 0 |
| MKS1     | chr17 | 56292126/C//T    | nonsynonymous | 1 | 0 |
| LPO      | chr17 | 56324994/T//C    | nonsynonymous | 1 | 0 |
| USP32    | chr17 | 58258825/T//C    | nonsynonymous | 1 | 0 |
| SCN4A    | chr17 | 62025364/G//A    | synonymous    | 1 | 0 |
| C17orf80 | chr17 | 71232845/G//T    | nonsynonymous | 1 | 0 |
| CEP131   | chr17 | 79164443/G//A    | nonsynonymous | 1 | 0 |
| CEP131   | chr17 | 79167880/C//T    | nonsynonymous | 1 | 0 |
| ASPSR1   | chr17 | 79966930/C//T    | synonymous    | 1 | 0 |
| GPS1     | chr17 | 80012855/C//T    | synonymous    | 1 | 0 |
| RAB40B   | chr17 | 80615972/A//G    | nonsynonymous | 1 | 0 |
| EMILIN2  | chr18 | 2913162/C//T     | synonymous    | 1 | 0 |
| EPB41L3  | chr18 | 5396264/A//G     | nonsynonymous | 1 | 0 |
| LAMA1    | chr18 | 7117714/G//A     | synonymous    | 1 | 0 |
| PTPRM    | chr18 | 8376517/C//T     | synonymous    | 1 | 0 |
| APCDD1   | chr18 | 10487720/C//T    | synonymous    | 1 | 0 |
| ANKRD30B | chr18 | 14791477/T//C    | synonymous    | 1 | 0 |
| CDH2     | chr18 | 25565119/G//A    | nonsynonymous | 1 | 0 |
| GAREM1   | chr18 | 29847792/G//A    | synonymous    | 1 | 0 |
| DTNA     | chr18 | 32398248/G//A    | nonsynonymous | 1 | 0 |
| ELOA2    | chr18 | 44561289/G//A    | nonsynonymous | 1 | 0 |
| ALPK2    | chr18 | 56246909/C//T    | nonsynonymous | 1 | 0 |
| PARD6G   | chr18 | 77917975/C//T    | synonymous    | 1 | 0 |
| PTBP1    | chr19 | 810702/G//A      | nonsynonymous | 1 | 0 |
| ARID3A   | chr19 | 964240/T//C      | synonymous    | 1 | 0 |
| C19orf71 | chr19 | 3543894/G//A     | synonymous    | 1 | 0 |
| CACTIN   | chr19 | 3612372/C//A     | nonsynonymous | 1 | 0 |
| TJP3     | chr19 | 3733900/G//A     | synonymous    | 1 | 0 |
| ANKRD24  | chr19 | 4199727/C//A     | synonymous    | 1 | 0 |
| CHAF1A   | chr19 | 4409651/G//A     | synonymous    | 1 | 0 |
| CD70     | chr19 | 6586309/C//T     | nonsynonymous | 1 | 0 |
| MUC16    | chr19 | 9049911/G//A     | nonsynonymous | 1 | 0 |
| MUC16    | chr19 | 9074046/G//A     | nonsynonymous | 1 | 0 |
| MUC16    | chr19 | 9089228/C//A     | nonsynonymous | 1 | 0 |
| OR1M1    | chr19 | 9204102/T//C     | nonsynonymous | 1 | 0 |
| MRPL4    | chr19 | 10369182/G//A    | nonsynonymous | 1 | 0 |
| CCDC151  | chr19 | 11531472/A//G    | synonymous    | 1 | 0 |
| ELOF1    | chr19 | 11665155/C//T    | nonsynonymous | 1 | 0 |
| ZNF333   | chr19 | 14829744/G//C    | nonsynonymous | 1 | 0 |
| CYP4F3   | chr19 | 15760857/G//A    | nonsynonymous | 1 | 0 |
| F2RL3    | chr19 | 17000886/G//A    | synonymous    | 1 | 0 |
| MYO9B    | chr19 | 17278762/C//T    | nonsynonymous | 1 | 0 |
| MVB12A   | chr19 | 17534317/G//A    | nonsynonymous | 1 | 0 |
| MAST3    | chr19 | 18241518/C//A    | synonymous    | 1 | 0 |
| PDE4C    | chr19 | 18322032/C//G    | nonsynonymous | 1 | 0 |
| PGPEP1   | chr19 | 18468322/G//A    | nonsynonymous | 1 | 0 |
| CILP2    | chr19 | 19655085/T//C    | synonymous    | 1 | 0 |
| ZNF90    | chr19 | 20230112/T//C    | synonymous    | 1 | 0 |
| ZNF431   | chr19 | 21365480/C//T    | nonsynonymous | 1 | 0 |
| ZNF536   | chr19 | 30934676/C//T    | synonymous    | 1 | 0 |
| KCTD15   | chr19 | 34302423/C//T    | nonsynonymous | 1 | 0 |
| ARHGAP33 | chr19 | 36268753/G//A    | synonymous    | 1 | 0 |
| NFKBID   | chr19 | 36386971/G//T    | nonsynonymous | 1 | 0 |
| ZNF566   | chr19 | 36939976/C//T    | nonsynonymous | 1 | 0 |
| SYCN     | chr19 | 39694735/C//T    | nonsynonymous | 1 | 0 |
| LRFN1    | chr19 | 39805798/G//A    | nonsynonymous | 1 | 0 |
| FCGBP    | chr19 | 40421528/G//A    | nonsynonymous | 1 | 0 |
| ARHGEF1  | chr19 | 42396432/G//A    | nonsynonymous | 1 | 0 |
| CBLC     | chr19 | 45293332/G//A    | nonsynonymous | 1 | 0 |
| NECTIN2  | chr19 | 45349844/T//C    | nonsynonymous | 1 | 0 |

|           |       |               |               |   |   |
|-----------|-------|---------------|---------------|---|---|
| PPP5C     | chr19 | 46878954/G//A | nonsynonymous | 1 | 0 |
| C5AR1     | chr19 | 47823651/G//A | nonsynonymous | 1 | 0 |
| SLC8A2    | chr19 | 47960638/C//T | nonsynonymous | 1 | 0 |
| SNRNP70   | chr19 | 49601737/G//A | nonsynonymous | 1 | 0 |
| NOSIP     | chr19 | 50059077/G//A | synonymous    | 1 | 0 |
| IRF3      | chr19 | 50163053/G//A | nonsynonymous | 1 | 0 |
| IRF3      | chr19 | 50166616/G//A | synonymous    | 1 | 0 |
| AP2A1     | chr19 | 50306448/T//C | nonsynonymous | 1 | 0 |
| MED25     | chr19 | 50331796/C//T | synonymous    | 1 | 0 |
| ACPT      | chr19 | 51298205/G//T | nonsynonymous | 1 | 0 |
| CNOT3     | chr19 | 54653310/G//A | synonymous    | 1 | 0 |
| KIR2DS4   | chr19 | 55344229/A//G | nonsynonymous | 1 | 0 |
| NLRP7     | chr19 | 55453071/C//T | synonymous    | 1 | 0 |
| SSC5D     | chr19 | 56011570/C//T | nonsynonymous | 1 | 0 |
| SSC5D     | chr19 | 56030241/G//A | nonsynonymous | 1 | 0 |
| FIZ1      | chr19 | 56104952/G//A | nonsynonymous | 1 | 0 |
| ZNF784    | chr19 | 56133340/C//T | nonsynonymous | 1 | 0 |
| NLRP4     | chr19 | 56382262/C//T | synonymous    | 1 | 0 |
| ZNF835    | chr19 | 57175947/G//A | nonsynonymous | 1 | 0 |
| ZNF587B   | chr19 | 58341914/G//A | synonymous    | 1 | 0 |
| ZNF837    | chr19 | 58879155/G//C | synonymous    | 1 | 0 |
| ADRA1D    | chr20 | 4228780/G//A  | synonymous    | 1 | 0 |
| JAG1      | chr20 | 10620587/C//T | synonymous    | 1 | 0 |
| GGTLC1    | chr20 | 23966394/G//A | synonymous    | 1 | 0 |
| BPIFB3    | chr20 | 31643318/C//T | nonsynonymous | 1 | 0 |
| BPIFB4    | chr20 | 31672739/G//A | nonsynonymous | 1 | 0 |
| SNTA1     | chr20 | 32026691/G//A | nonsynonymous | 1 | 0 |
| MYH7B     | chr20 | 33584569/T//C | synonymous    | 1 | 0 |
| PLCG1     | chr20 | 39766415/G//A | nonsynonymous | 1 | 0 |
| SEMG2     | chr20 | 43851727/C//T | nonsynonymous | 1 | 0 |
| ZNF335    | chr20 | 44599934/C//T | nonsynonymous | 1 | 0 |
| MMP9      | chr20 | 44639830/C//A | nonsynonymous | 1 | 0 |
| ZNF334    | chr20 | 45130548/G//A | nonsynonymous | 1 | 0 |
| SPATA2    | chr20 | 48522331/C//T | nonsynonymous | 1 | 0 |
| KCNG1     | chr20 | 49621062/G//A | synonymous    | 1 | 0 |
| KCNG1     | chr20 | 49626763/G//A | nonsynonymous | 1 | 0 |
| ZBP1      | chr20 | 56186809/G//A | nonsynonymous | 1 | 0 |
| ZBP1      | chr20 | 56186869/C//T | nonsynonymous | 1 | 0 |
| NELFCD    | chr20 | 57564070/C//T | synonymous    | 1 | 0 |
| CDH4      | chr20 | 60348109/G//T | nonsynonymous | 1 | 0 |
| ADRM1     | chr20 | 60883124/G//A | nonsynonymous | 1 | 0 |
| LAMA5     | chr20 | 60886347/C//T | nonsynonymous | 1 | 0 |
| SLCO4A1   | chr20 | 61288443/G//A | nonsynonymous | 1 | 0 |
| KCNQ2     | chr20 | 62071069/A//G | synonymous    | 1 | 0 |
| UCKL1     | chr20 | 62572189/C//T | synonymous    | 1 | 0 |
| LTN1      | chr21 | 30357231/G//A | nonsynonymous | 1 | 0 |
| KRTAP13-1 | chr21 | 31768653/C//A | synonymous    | 1 | 0 |
| SCAF4     | chr21 | 33057461/C//T | nonsynonymous | 1 | 0 |
| URB1      | chr21 | 33721744/G//T | nonsynonymous | 1 | 0 |
| KCNJ6     | chr21 | 39087292/G//A | synonymous    | 1 | 0 |
| ETS2      | chr21 | 40191697/G//A | synonymous    | 1 | 0 |
| RIPK4     | chr21 | 43161633/G//A | synonymous    | 1 | 0 |
| ABCG1     | chr21 | 43710300/C//T | synonymous    | 1 | 0 |
| SLC37A1   | chr21 | 43985955/G//A | nonsynonymous | 1 | 0 |
| PFKL      | chr21 | 45726593/C//T | nonsynonymous | 1 | 0 |
| TSPEAR    | chr21 | 45953608/C//T | nonsynonymous | 1 | 0 |
| COL6A1    | chr21 | 47423939/C//T | synonymous    | 1 | 0 |
| FTCD      | chr21 | 47574209/G//A | nonsynonymous | 1 | 0 |
| DIP2A     | chr21 | 47929239/G//A | nonsynonymous | 1 | 0 |
| DIP2A     | chr21 | 47976917/G//A | synonymous    | 1 | 0 |
| PRMT2     | chr21 | 48069494/C//T | nonsynonymous | 1 | 0 |
| MICAL3    | chr22 | 18378155/C//T | synonymous    | 1 | 0 |
| ARVCF     | chr22 | 19978191/G//A | nonsynonymous | 1 | 0 |
| ZDHHC8    | chr22 | 20127115/C//T | nonsynonymous | 1 | 0 |
| ZDHHC8    | chr22 | 20132832/G//C | nonsynonymous | 1 | 0 |
| MAPK1     | chr22 | 22127163/T//A | nonsynonymous | 1 | 0 |
| SMARCB1   | chr22 | 24175804/C//T | synonymous    | 1 | 0 |
| SLC2A11   | chr22 | 24210820/G//A | synonymous    | 1 | 0 |
| MN1       | chr22 | 28192923/G//T | nonsynonymous | 1 | 0 |
| TTC28     | chr22 | 28394670/A//G | synonymous    | 1 | 0 |

|          |       |                |               |   |   |
|----------|-------|----------------|---------------|---|---|
| PES1     | chr22 | 30976629/C//A  | nonsynonymous | 1 | 0 |
| RASD2    | chr22 | 35947872/C//T  | synonymous    | 1 | 0 |
| IL2RB    | chr22 | 37524301/C//A  | synonymous    | 1 | 0 |
| APOBEC3F | chr22 | 39448268/C//T  | nonsynonymous | 1 | 0 |
| CACNA11  | chr22 | 40080499/G//A  | nonsynonymous | 1 | 0 |
| TTLL1    | chr22 | 43459882/C//T  | synonymous    | 1 | 0 |
| TTLL12   | chr22 | 43564087/G//C  | nonsynonymous | 1 | 0 |
| PKDREJ   | chr22 | 46655196/T//C  | nonsynonymous | 1 | 0 |
| MAP3K15  | chrX  | 19443779/T//C  | nonsynonymous | 1 | 0 |
| HDAC6    | chrX  | 48681632/G//A  | synonymous    | 1 | 0 |
| PIM2     | chrX  | 48775087/G//A  | nonsynonymous | 1 | 0 |
| ITIH6    | chrX  | 54783724/G//T  | nonsynonymous | 1 | 0 |
| STARD8   | chrX  | 67940161/G//A  | nonsynonymous | 1 | 0 |
| ATRX     | chrX  | 76939489/A//G  | nonsynonymous | 1 | 0 |
| RPA4     | chrX  | 96140039/G//A  | nonsynonymous | 1 | 0 |
| ARMCX4   | chrX  | 100749566/C//T | nonsynonymous | 1 | 0 |
| MUM1L1   | chrX  | 105450853/C//T | synonymous    | 1 | 0 |
| COL4A5   | chrX  | 107842006/G//A | synonymous    | 1 | 0 |
| DOCK11   | chrX  | 117815215/C//T | synonymous    | 1 | 0 |
| ELF4     | chrX  | 129201398/A//C | nonsynonymous | 1 | 0 |
| L1CAM    | chrX  | 153134085/C//T | nonsynonymous | 1 | 0 |
| TKTL1    | chrX  | 153556271/C//T | nonsynonymous | 1 | 0 |
| LIN9     | chr1  | 226453930/A//G | nonsynonymous | 0 | 1 |
| TET3     | chr2  | 74326594/C//T  | synonymous    | 0 | 1 |
| HOXD1    | chr2  | 177053577/C//T | synonymous    | 0 | 1 |
| ATRIP    | chr3  | 48498707/A//G  | synonymous    | 0 | 1 |
| LRBA     | chr4  | 151814267/A//G | nonsynonymous | 0 | 1 |
| DBH      | chr9  | 136501772/C//T | synonymous    | 0 | 1 |
| MUC6     | chr11 | 1016795/C//G   | nonsynonymous | 0 | 1 |
| PITPNM1  | chr11 | 67266256/A//G  | nonsynonymous | 0 | 1 |
| UBC      | chr12 | 125396833/G//A | synonymous    | 0 | 1 |
| VASH1    | chr14 | 77229481/A//G  | synonymous    | 0 | 1 |
| HSD3B7   | chr16 | 30999326/C//T  | nonsynonymous | 0 | 1 |
| ZNF14    | chr19 | 19843919/A//G  | synonymous    | 0 | 1 |
| ZNF726   | chr19 | 24115813/G//A  | nonsynonymous | 0 | 1 |
| CELA2A   | chr1  | 15783656/G//A  | nonsynonymous | 0 | 1 |
| CSF1     | chr1  | 110459975/A//G | nonsynonymous | 0 | 1 |
| PTGFRN   | chr1  | 117529590/G//A | synonymous    | 0 | 1 |
| RAB13    | chr1  | 153957224/T//C | nonsynonymous | 0 | 1 |
| LMNA     | chr1  | 156084775/G//T | synonymous    | 0 | 1 |
| TMEM79   | chr1  | 156255604/A//G | nonsynonymous | 0 | 1 |
| PEAR1    | chr1  | 156883273/T//A | nonsynonymous | 0 | 1 |
| F13B     | chr1  | 197031980/G//A | synonymous    | 0 | 1 |
| DISC1    | chr1  | 232172585/C//T | synonymous    | 0 | 1 |
| ASPRV1   | chr2  | 70188487/C//T  | nonsynonymous | 0 | 1 |
| TRIM43   | chr2  | 96260866/G//A  | synonymous    | 0 | 1 |
| GALNT5   | chr2  | 158114910/G//T | nonsynonymous | 0 | 1 |
| TTN      | chr2  | 179584922/G//C | nonsynonymous | 0 | 1 |
| KRBOX1   | chr3  | 42983443/C//T  | synonymous    | 0 | 1 |
| USP4     | chr3  | 49315781/CT//C | nonsynonymous | 0 | 1 |
| ATP13A4  | chr3  | 193132381/C//T | nonsynonymous | 0 | 1 |
| RBM47    | chr4  | 40440935/C//T  | synonymous    | 0 | 1 |
| SHROOM3  | chr4  | 77660625/T//C  | synonymous    | 0 | 1 |
| SLC6A3   | chr5  | 1409168/C//T   | nonsynonymous | 0 | 1 |
| UGT3A1   | chr5  | 35954342/T//C  | nonsynonymous | 0 | 1 |
| PGGT1B   | chr5  | 114548188/G//A | nonsynonymous | 0 | 1 |
| PCDHA1   | chr5  | 140165983/G//A | synonymous    | 0 | 1 |
| C6orf10  | chr6  | 32337746/C//T  | nonsynonymous | 0 | 1 |
| TCTE1    | chr6  | 44255348/G//C  | nonsynonymous | 0 | 1 |
| FAM83B   | chr6  | 54791268/G//T  | nonsynonymous | 0 | 1 |
| SYNE1    | chr6  | 152719846/C//G | nonsynonymous | 0 | 1 |
| PVRIG    | chr7  | 99818419/C//T  | synonymous    | 0 | 1 |
| SLC26A3  | chr7  | 107430134/C//G | nonsynonymous | 0 | 1 |
| ZNF425   | chr7  | 148801134/T//A | nonsynonymous | 0 | 1 |
| ZNF425   | chr7  | 148801141/T//C | nonsynonymous | 0 | 1 |
| FAM120A  | chr9  | 96318673/C//G  | nonsynonymous | 0 | 1 |
| PRRX2    | chr9  | 132482974/G//A | nonsynonymous | 0 | 1 |
| BICC1    | chr10 | 60562879/C//T  | synonymous    | 0 | 1 |
| MFSD13A  | chr10 | 104231068/C//T | nonsynonymous | 0 | 1 |
| PTDSS2   | chr11 | 490545/G//T    | nonsynonymous | 0 | 1 |

|             |       |                    |               |   |   |
|-------------|-------|--------------------|---------------|---|---|
| RPS6KA4     | chr11 | 64138105/C//T      | synonymous    | 0 | 1 |
| EHBP1L1     | chr11 | 65343766/C//T      | synonymous    | 0 | 1 |
| TYR         | chr11 | 88911176/C//T      | nonsynonymous | 0 | 1 |
| PGR         | chr11 | 100998499/C//T     | nonsynonymous | 0 | 1 |
| CMAS        | chr12 | 22214284/C//T      | synonymous    | 0 | 1 |
| HELB        | chr12 | 66725214/C//T      | nonsynonymous | 0 | 1 |
| DNAH10      | chr12 | 124341628/G//A     | nonsynonymous | 0 | 1 |
| PSMC6       | chr14 | 53194225/G//A      | nonsynonymous | 0 | 1 |
| EVL         | chr14 | 100610098/T//C     | synonymous    | 0 | 1 |
| ZSCAN29     | chr15 | 43656419/G//A      | nonsynonymous | 0 | 1 |
| BCAR1       | chr16 | 75263928/C//A      | synonymous    | 0 | 1 |
| AATF        | chr17 | 35345911/C//G      | nonsynonymous | 0 | 1 |
| MAP3K14-AS1 | chr17 | 43344611/T//C      | synonymous    | 0 | 1 |
| MED13       | chr17 | 60107208/A//G      | synonymous    | 0 | 1 |
| THOC1       | chr18 | 214610/A//G        | synonymous    | 0 | 1 |
| LRRRC8E     | chr19 | 7963909/G//A       | nonsynonymous | 0 | 1 |
| KRI1        | chr19 | 10671697/T//C      | synonymous    | 0 | 1 |
| CARM1       | chr19 | 11019855/T//C      | nonsynonymous | 0 | 1 |
| CACNA1A     | chr19 | 13616905/T//G      | nonsynonymous | 0 | 1 |
| CC2D1A      | chr19 | 14024029/A//G      | nonsynonymous | 0 | 1 |
| HAUS5       | chr19 | 36109600/A//T      | nonsynonymous | 0 | 1 |
| PLD3        | chr19 | 40883981/C//T      | synonymous    | 0 | 1 |
| CEACAM1     | chr19 | 43032650/G//C      | synonymous    | 0 | 1 |
| PSG8        | chr19 | 43262357/C//T      | nonsynonymous | 0 | 1 |
| LHB         | chr19 | 49519855/T//G      | synonymous    | 0 | 1 |
| STAU1       | chr20 | 47734362/C//T      | synonymous    | 0 | 1 |
| BAGE4       | chr21 | 11097536/C//A      | synonymous    | 0 | 1 |
| LPAR4       | chrX  | 78010766/G//T      | nonsynonymous | 0 | 1 |
| TCHH        | chr1  | 152082986/GTTCC//G | nonsynonymous | 0 | 1 |
| APOB        | chr2  | 21249777/T//A      | synonymous    | 0 | 1 |
| C2orf16     | chr2  | 27805143/C//T      | nonsynonymous | 0 | 1 |
| TTN-AS1     | chr2  | 179470115/A//T     | synonymous    | 0 | 1 |
| SYN2        | chr3  | 12187259/T//A      | nonsynonymous | 0 | 1 |
| IMPG2       | chr3  | 101010336/C//A     | nonsynonymous | 0 | 1 |
| KALRN       | chr3  | 124053180/C//T     | synonymous    | 0 | 1 |
| ANKRD31     | chr5  | 74532547/C//G      | synonymous    | 0 | 1 |
| MUC22       | chr6  | 30996697/T//C      | synonymous    | 0 | 1 |
| RSPO3       | chr6  | 127469985/G//T     | nonsynonymous | 0 | 1 |
| PAPOLB      | chr7  | 4901208/G//A       | synonymous    | 0 | 1 |
| CDK13       | chr7  | 40134059/G//T      | nonsynonymous | 0 | 1 |
| ZNF479      | chr7  | 57188030/T//G      | nonsynonymous | 0 | 1 |
| SEMA3C      | chr7  | 80374525/T//A      | nonsynonymous | 0 | 1 |
| AKAP9       | chr7  | 91707149/C//T      | nonsynonymous | 0 | 1 |
| SSPO        | chr7  | 149511855/G//A     | synonymous    | 0 | 1 |
| KMT2C       | chr7  | 152007132/C//T     | synonymous    | 0 | 1 |
| SLC39A14    | chr8  | 22273394/A//G      | nonsynonymous | 0 | 1 |
| TM2D2       | chr8  | 38851182/G//C      | synonymous    | 0 | 1 |
| SKIDA1      | chr10 | 21804729/C//T      | nonsynonymous | 0 | 1 |
| PACSIN3     | chr11 | 47201022/A//G      | nonsynonymous | 0 | 1 |
| DCUN1D5     | chr11 | 102937214/A//T     | nonsynonymous | 0 | 1 |
| WNK1        | chr12 | 987460/C//A        | nonsynonymous | 0 | 1 |
| ALDH2       | chr12 | 112219776/G//A     | nonsynonymous | 0 | 1 |
| EAPP        | chr14 | 34985388/T//A      | synonymous    | 0 | 1 |
| FRMD6       | chr14 | 52194644/C//A      | nonsynonymous | 0 | 1 |
| SV2B        | chr15 | 91825001/T//G      | nonsynonymous | 0 | 1 |
| SEPT1       | chr16 | 30393464/C//T      | nonsynonymous | 0 | 1 |
| SUPT6H      | chr17 | 27003417/T//C      | nonsynonymous | 0 | 1 |
| MILR1       | chr17 | 62461659/G//C      | nonsynonymous | 0 | 1 |
| TGFBR3L     | chr19 | 7981159/G//A       | nonsynonymous | 0 | 1 |
| PRAM1       | chr19 | 8555772/T//A       | nonsynonymous | 0 | 1 |
| ANO8        | chr19 | 17441651/G//A      | nonsynonymous | 0 | 1 |
| CNOT3       | chr19 | 54647836/A//C      | nonsynonymous | 0 | 1 |
| ZNF71       | chr19 | 57133664/C//A      | nonsynonymous | 0 | 1 |
| ZNF132      | chr19 | 58946465/A//G      | nonsynonymous | 0 | 1 |
| KAT14       | chr20 | 18142571/C//T      | nonsynonymous | 0 | 1 |
| SRSF6       | chr20 | 42088466/A//T      | synonymous    | 0 | 1 |
| SOX18       | chr20 | 62679525/G//A      | synonymous    | 0 | 1 |
| KRTAP10-9   | chr21 | 46047295/A//G      | synonymous    | 0 | 1 |
| AIM1L       | chr1  | 26671578/A//G      | nonsynonymous | 1 | 0 |
| CSMD2       | chr1  | 34006191/A//G      | nonsynonymous | 1 | 0 |

|              |       |                 |               |   |   |
|--------------|-------|-----------------|---------------|---|---|
| DENND2C      | chr1  | 115166125/T//A  | synonymous    | 1 | 0 |
| PFDN2        | chr1  | 161072096/T//G  | nonsynonymous | 1 | 0 |
| SLC9C2       | chr1  | 173517633/T//G  | synonymous    | 1 | 0 |
| RALGPS2      | chr1  | 178861429/A//G  | nonsynonymous | 1 | 0 |
| HMCN1        | chr1  | 185988672/G//A  | nonsynonymous | 1 | 0 |
| RAB3GAP2     | chr1  | 220375699/C//T  | nonsynonymous | 1 | 0 |
| ZEB2         | chr2  | 145157522/C//A  | nonsynonymous | 1 | 0 |
| LHFPL4       | chr3  | 9543998/AAG//A  | synonymous    | 1 | 0 |
| LHFPL4       | chr3  | 9594062/A//G    | nonsynonymous | 1 | 0 |
| FANCD2OS     | chr3  | 10146294/G//A   | synonymous    | 1 | 0 |
| CHDH         | chr3  | 53853009/T//C   | nonsynonymous | 1 | 0 |
| ROBO1        | chr3  | 78706381/G//T   | nonsynonymous | 1 | 0 |
| JAKMIP1      | chr4  | 6083475/C//T    | nonsynonymous | 1 | 0 |
| ENAM         | chr4  | 71508491/C//T   | nonsynonymous | 1 | 0 |
| MOG          | chr6  | 29639192/T//C   | synonymous    | 1 | 0 |
| MDN1         | chr6  | 90367948/C//T   | nonsynonymous | 1 | 0 |
| PRPS1L1      | chr7  | 18066440/G//A   | synonymous    | 1 | 0 |
| BMT2         | chr7  | 112462378/C//G  | nonsynonymous | 1 | 0 |
| OR2F2        | chr7  | 143632955/T//C  | synonymous    | 1 | 0 |
| ST18         | chr8  | 53084753/A//G   | nonsynonymous | 1 | 0 |
| ZFHx4        | chr8  | 77767054/A//G   | nonsynonymous | 1 | 0 |
| ZNF572       | chr8  | 125989602/T//G  | nonsynonymous | 1 | 0 |
| RASEF        | chr9  | 85615125/A//C   | nonsynonymous | 1 | 0 |
| C9orf50      | chr9  | 132375724/A//T  | nonsynonymous | 1 | 0 |
| PRDM10       | chr11 | 129782060/G//A  | nonsynonymous | 1 | 0 |
| USP5         | chr12 | 6968672/C//T    | nonsynonymous | 1 | 0 |
| AVPR1A       | chr12 | 63541267/C//G   | nonsynonymous | 1 | 0 |
| BICDL1       | chr12 | 120499580/A//G  | nonsynonymous | 1 | 0 |
| SETDB2-PHF11 | chr13 | 50092272/T//C   | nonsynonymous | 1 | 0 |
| DOCK9        | chr13 | 99538810/G//A   | synonymous    | 1 | 0 |
| ARHGEF40     | chr14 | 21552086/G//A   | synonymous    | 1 | 0 |
| ACOT2        | chr14 | 74036010/C//T   | synonymous    | 1 | 0 |
| XPO6         | chr16 | 28222769/T//A   | synonymous    | 1 | 0 |
| RNF167       | chr17 | 4844287/C//T    | nonsynonymous | 1 | 0 |
| SGCA         | chr17 | 48245825/C//A   | nonsynonymous | 1 | 0 |
| TLK2         | chr17 | 60613535/G//A   | nonsynonymous | 1 | 0 |
| MYOM1        | chr18 | 3189010/C//T    | synonymous    | 1 | 0 |
| ABCA7        | chr19 | 1058047/T//C    | nonsynonymous | 1 | 0 |
| PLIN5        | chr19 | 4529803/G//A    | nonsynonymous | 1 | 0 |
| CAMSAP3      | chr19 | 7677865/C//T    | nonsynonymous | 1 | 0 |
| ECSIT        | chr19 | 11624808/A//G   | nonsynonymous | 1 | 0 |
| NOTCH3       | chr19 | 15302874/T//C   | synonymous    | 1 | 0 |
| PCED1A       | chr20 | 2819713/C//G    | nonsynonymous | 1 | 0 |
| KCNJ4        | chr22 | 38823334/G//A   | synonymous    | 1 | 0 |
| MAGEB2       | chrX  | 30237194/T//A   | nonsynonymous | 1 | 0 |
| PLP1         | chrX  | 103041508/C//T  | synonymous    | 1 | 0 |
| XPO1         | chr2  | 61719589/T//C   | nonsynonymous | 0 | 1 |
| GOLGA4       | chr3  | 37402747/G//A   | nonsynonymous | 0 | 1 |
| GPER1        | chr7  | 1132429/C//T    | synonymous    | 0 | 1 |
| IGFBP1       | chr7  | 45932783/GTA//G | synonymous    | 0 | 1 |
| NFX1         | chr9  | 33369947/A//G   | nonsynonymous | 0 | 1 |
| CCDC34       | chr11 | 27384459/C//T   | nonsynonymous | 0 | 1 |
| DNAH10       | chr12 | 124297910/G//A  | nonsynonymous | 0 | 1 |
| LDHD         | chr16 | 75148854/C//T   | nonsynonymous | 0 | 1 |
| MYH4         | chr17 | 10355577/C//T   | nonsynonymous | 0 | 1 |
| RARA         | chr17 | 38508583/A//G   | nonsynonymous | 0 | 1 |
| FN3K         | chr17 | 80696370/G//A   | synonymous    | 0 | 1 |
| ZNF714       | chr19 | 21300262/T//C   | synonymous    | 0 | 1 |
| VSX1         | chr20 | 25062450/C//T   | nonsynonymous | 0 | 1 |
| POF1B        | chrX  | 84561299/T//C   | nonsynonymous | 0 | 1 |
| NXF2B        | chrX  | 101623470/T//C  | nonsynonymous | 0 | 1 |
| FLNA         | chrX  | 153581656/C//T  | synonymous    | 0 | 1 |
| HDAC11       | chr3  | 13525022/C//G   | nonsynonymous | 0 | 1 |
| FIP1L1       | chr4  | 54319247/CAG//C | nonsynonymous | 0 | 1 |
| GRK6         | chr5  | 176863495/G//C  | synonymous    | 0 | 1 |
| NEU1         | chr6  | 31827591/G//A   | nonsynonymous | 0 | 1 |
| CDC40        | chr6  | 110547399/C//T  | nonsynonymous | 0 | 1 |
| ZNF680       | chr7  | 63982167/A//T   | nonsynonymous | 0 | 1 |
| NSUN5        | chr7  | 72717849/C//T   | synonymous    | 0 | 1 |
|              | chr9  | 71820073/A//G   | synonymous    | 0 | 1 |

|          |       |                           |               |   |   |
|----------|-------|---------------------------|---------------|---|---|
| ENTPD1   | chr10 | 97607225/G//T             | nonsynonymous | 0 | 1 |
| NPAP1    | chr15 | 24921934/C//A             | nonsynonymous | 0 | 1 |
| GRB2     | chr17 | 73316600/T//C             | nonsynonymous | 0 | 1 |
| ATP8B1   | chr18 | 55315606/T//C             | synonymous    | 0 | 1 |
| FAM199X  | chrX  | 103411441/G//A            | synonymous    | 0 | 1 |
| PRAMEF11 | chr1  | 12884937/C//G             | nonsynonymous | 0 | 1 |
| IFI6     | chr1  | 27994738/G//A             | synonymous    | 0 | 1 |
| UNC80    | chr2  | 210745785/T//G            | synonymous    | 0 | 1 |
| VGLL3    | chr3  | 87017802/G//T             | nonsynonymous | 0 | 1 |
| HSD17B13 | chr4  | 88244012/T//G             | synonymous    | 0 | 1 |
| MEPE     | chr4  | 88766449/C//T             | synonymous    | 0 | 1 |
| DIAPH1   | chr5  | 140896283/C//T            | synonymous    | 0 | 1 |
| PI16     | chr6  | 36929682/G//A             | nonsynonymous | 0 | 1 |
| PTPN12   | chr7  | 77247853/T//C             | synonymous    | 0 | 1 |
| PTCD1    | chr7  | 99017748/C//T             | nonsynonymous | 0 | 1 |
| MUC12    | chr7  | 100643255/C//G            | nonsynonymous | 0 | 1 |
| RNF148   | chr7  | 122342042/C//A            | nonsynonymous | 0 | 1 |
| ATP6V1F  | chr7  | 128502994/A//G            | synonymous    | 0 | 1 |
| GATA4    | chr8  | 11566350/G//A             | nonsynonymous | 0 | 1 |
| FGFR1    | chr8  | 38287335/C//T             | nonsynonymous | 0 | 1 |
| KDM4C    | chr9  | 6849524/C//G              | nonsynonymous | 0 | 1 |
| ERCC6L2  | chr9  | 98643344/G//T             | nonsynonymous | 0 | 1 |
| NOLC1    | chr10 | 103919996/G//C            | nonsynonymous | 0 | 1 |
| CAPN5    | chr11 | 76826479/C//T             | synonymous    | 0 | 1 |
| TMEM225  | chr11 | 123754797/A//C            | nonsynonymous | 0 | 1 |
| OR8B8    | chr11 | 124310561/A//G            | nonsynonymous | 0 | 1 |
| HEBP1    | chr12 | 13128297/T//C             | nonsynonymous | 0 | 1 |
| DIP2B    | chr12 | 51112580/A//G             | synonymous    | 0 | 1 |
| HIP1R    | chr12 | 123339597/C//T            | synonymous    | 0 | 1 |
|          | chr13 | 95098015/TCTGTTGAGACACAAA | synonymous    | 0 | 1 |
| CHD8     | chr14 | 21899176/T//C             | synonymous    | 0 | 1 |
| GEMIN2   | chr14 | 39583584/G//T             | nonsynonymous | 0 | 1 |
| BEGAIN   | chr14 | 101004359/T//C            | nonsynonymous | 0 | 1 |
| CCBE1    | chr18 | 57105385/A//C             | synonymous    | 0 | 1 |
| NUCB1    | chr19 | 49409068/A//G             | nonsynonymous | 0 | 1 |
| GPCPD1   | chr20 | 5554620/AAAG//A           | synonymous    | 0 | 1 |
| TXNRD2   | chr22 | 19929310/A//G             | nonsynonymous | 0 | 1 |
| DENND6B  | chr22 | 50752254/G//A             | nonsynonymous | 0 | 1 |
| SLC25A5  | chrX  | 118605027/T//C            | synonymous    | 0 | 1 |
| MAGEC2   | chrX  | 141290946/T//G            | nonsynonymous | 0 | 1 |
| SLC10A3  | chrX  | 153716374/A//G            | synonymous    | 0 | 1 |
| FLG2     | chr1  | 152327700/T//C            | synonymous    | 0 | 1 |
| BSN      | chr3  | 49700327/A//G             | nonsynonymous | 0 | 1 |
| DNAH12   | chr3  | 57431857/A//G             | synonymous    | 0 | 1 |
|          | chr3  | 71247218/C//T             | synonymous    | 0 | 1 |
| SCLT1    | chr4  | 129864157/T//G            | nonsynonymous | 0 | 1 |
| WDR36    | chr5  | 110446639/C//T            | synonymous    | 0 | 1 |
| APC      | chr5  | 112174094/T//TA           | nonsynonymous | 0 | 1 |
| ADAM32   | chr8  | 39068746/T//C             | nonsynonymous | 0 | 1 |
| ZNF79    | chr9  | 130206895/G//A            | nonsynonymous | 0 | 1 |
| KIF11    | chr10 | 94405164/AAT//A           | nonsynonymous | 0 | 1 |
| TCIRG1   | chr11 | 67818055/T//C             | nonsynonymous | 0 | 1 |
| MAGEL2   | chr15 | 23891962/G//C             | nonsynonymous | 0 | 1 |
| ACACA    | chr17 | 35766436/G//A             | synonymous    | 0 | 1 |
| KAT7     | chr17 | 47882742/C//T             | nonsynonymous | 0 | 1 |
| CBX4     | chr17 | 77812861/G//A             | synonymous    | 0 | 1 |
| TXNL4A   | chr18 | 77748440/C//T             | synonymous    | 0 | 1 |
| IL12RB1  | chr19 | 18191756/A//G             | nonsynonymous | 0 | 1 |
| SLC7A4   | chr22 | 21383687/A//G             | nonsynonymous | 0 | 1 |
| ZNF674   | chrX  | 46360667/A//G             | synonymous    | 0 | 1 |
| TFDP3    | chrX  | 132351326/A//G            | nonsynonymous | 0 | 1 |
| HRNR     | chr1  | 152192365/G//A            | synonymous    | 0 | 1 |
| ATG7     | chr3  | 11340183/C//T             | nonsynonymous | 0 | 1 |
| CADM2    | chr3  | 85932512/T//C             | nonsynonymous | 0 | 1 |
| SLIT3    | chr5  | 168727810/C//T            | synonymous    | 0 | 1 |
| CACNA2D1 | chr7  | 81603852/G//A             | synonymous    | 0 | 1 |
| MUC17    | chr7  | 100685758/G//T            | nonsynonymous | 0 | 1 |
| KIAA1462 | chr10 | 30316002/A//G             | synonymous    | 0 | 1 |
| ZW10     | chr11 | 113608313/C//T            | nonsynonymous | 0 | 1 |
| CADM1    | chr11 | 115080317/G//A            | nonsynonymous | 0 | 1 |

|             |       |                       |               |   |   |
|-------------|-------|-----------------------|---------------|---|---|
| ALG10B      | chr12 | 38715051/A/G          | synonymous    | 0 | 1 |
| SETD1B      | chr12 | 122242663/C//A        | nonsynonymous | 0 | 1 |
| TNFRSF19    | chr13 | 24233240/G//A         | nonsynonymous | 0 | 1 |
| MAB21L1     | chr13 | 36049789/G//A         | nonsynonymous | 0 | 1 |
| MVP         | chr16 | 29857256/A/G          | synonymous    | 0 | 1 |
| SPIRE1      | chr18 | 12452291/A/G          | nonsynonymous | 0 | 1 |
| SLC24A3     | chr20 | 19566136/C//T         | nonsynonymous | 0 | 1 |
| KCNB1       | chr20 | 47990040/G//T         | nonsynonymous | 0 | 1 |
| SSTR3       | chr22 | 37603096/C//T         | synonymous    | 0 | 1 |
| CELSR1      | chr22 | 46932140/C//T         | nonsynonymous | 0 | 1 |
| DLG3        | chrX  | 69670107/T//C         | synonymous    | 0 | 1 |
| PCDH11X     | chrX  | 91133070/G//T         | nonsynonymous | 0 | 1 |
| CHD5        | chr1  | 6181203/G//A          | nonsynonymous | 0 | 1 |
| HTR1D       | chr1  | 23520502/T//C         | nonsynonymous | 0 | 1 |
| RHCE        | chr1  | 25735255/G//A         | nonsynonymous | 0 | 1 |
| SLC9A1      | chr1  | 27428546/G//A         | synonymous    | 0 | 1 |
| HDAC1       | chr1  | 32797187/A//T         | synonymous    | 0 | 1 |
| FPGT-TNNI3K | chr1  | 74905180/C//A         | nonsynonymous | 0 | 1 |
| ST6GALNAC5  | chr1  | 77510110/C//T         | synonymous    | 0 | 1 |
| COL11A1     | chr1  | 103488454/T//A        | nonsynonymous | 0 | 1 |
| FCRL2       | chr1  | 157739928/C//T        | nonsynonymous | 0 | 1 |
| F5          | chr1  | 169529840/C//T        | nonsynonymous | 0 | 1 |
| C4BPA       | chr1  | 207287635/G//A        | synonymous    | 0 | 1 |
| TRIM67      | chr1  | 231299572/G//A        | nonsynonymous | 0 | 1 |
| FAM98A      | chr2  | 33817277/C//T         | synonymous    | 0 | 1 |
|             | chr2  | 38523596/C//A         | synonymous    | 0 | 1 |
| ALMS1       | chr2  | 73678185/C//G         | nonsynonymous | 0 | 1 |
| EVA1A       | chr2  | 75720328/C//A         | synonymous    | 0 | 1 |
| INPP4A      | chr2  | 99156098/C//T         | nonsynonymous | 0 | 1 |
| RANBP2      | chr2  | 109399237/C//T        | synonymous    | 0 | 1 |
| CNTNAP5     | chr2  | 125204473/C//T        | nonsynonymous | 0 | 1 |
| NEB         | chr2  | 152404243/G//A        | nonsynonymous | 0 | 1 |
| TTN         | chr2  | 179639731/A//G        | nonsynonymous | 0 | 1 |
| ZNF804A     | chr2  | 185801432/C//A        | nonsynonymous | 0 | 1 |
| IDH1        | chr2  | 209106742/C//T        | nonsynonymous | 0 | 1 |
| PLXNB1      | chr3  | 48462763/G//T         | nonsynonymous | 0 | 1 |
| PHLDB2      | chr3  | 111671473/A//C        | nonsynonymous | 0 | 1 |
| PLXNA1      | chr3  | 126752799/G//A        | nonsynonymous | 0 | 1 |
| PRR23A      | chr3  | 138724643/G//A        | synonymous    | 0 | 1 |
| FFRC        | chr3  | 195785455/C//T        | nonsynonymous | 0 | 1 |
| HTT         | chr4  | 3174827/G//A          | nonsynonymous | 0 | 1 |
| PRSS12      | chr4  | 119239589/C//T        | nonsynonymous | 0 | 1 |
|             | chr4  | 155244315/A//G        | synonymous    | 0 | 1 |
| TENM3       | chr4  | 183713468/C//T        | synonymous    | 0 | 1 |
| DCTD        | chr4  | 183836213/T//C        | nonsynonymous | 0 | 1 |
| GAPT        | chr5  | 57790843/C//T         | synonymous    | 0 | 1 |
| THBS4       | chr5  | 79355694/C//T         | nonsynonymous | 0 | 1 |
| HAPLN1      | chr5  | 82948404/G//T         | nonsynonymous | 0 | 1 |
| PCDHB16     | chr5  | 140564213/G//A        | synonymous    | 0 | 1 |
| DIAPH1      | chr5  | 140896506/G//A        | nonsynonymous | 0 | 1 |
| GABRG2      | chr5  | 161530953/C//T        | synonymous    | 0 | 1 |
| GCM2        | chr6  | 10874898/T//A         | nonsynonymous | 0 | 1 |
| ZSCAN26     | chr6  | 28239942/C//T         | nonsynonymous | 0 | 1 |
| RIMS1       | chr6  | 72892765/A//C         | nonsynonymous | 0 | 1 |
| ROS1        | chr6  | 117679098/T//C        | synonymous    | 0 | 1 |
| SYNE1       | chr6  | 152749370/G//A        | nonsynonymous | 0 | 1 |
| FRMD1       | chr6  | 168462494/C//T        | synonymous    | 0 | 1 |
| DACT2       | chr6  | 168709327/G//A        | synonymous    | 0 | 1 |
| MICALL2     | chr7  | 1486367/TAAAGCCTCC//T | nonsynonymous | 0 | 1 |
| ABCB5       | chr7  | 20725386/T//G         | nonsynonymous | 0 | 1 |
| ELMO1       | chr7  | 37298864/C//A         | nonsynonymous | 0 | 1 |
| ZBPB        | chr7  | 50070900/C//T         | nonsynonymous | 0 | 1 |
| MUC17       | chr7  | 100680286/T//G        | nonsynonymous | 0 | 1 |
| CHRN3       | chr8  | 42585798/A//C         | nonsynonymous | 0 | 1 |
| PRKDC       | chr8  | 48794656/C//G         | synonymous    | 0 | 1 |
| PREX2       | chr8  | 68981377/G//A         | synonymous    | 0 | 1 |
| CRISPLD1    | chr8  | 75925185/C//A         | nonsynonymous | 0 | 1 |
| FRMPD1      | chr9  | 37745689/C//T         | synonymous    | 0 | 1 |
| ASPN        | chr9  | 95219629/C//T         | nonsynonymous | 0 | 1 |
| MVB12B      | chr9  | 129243698/G//T        | nonsynonymous | 0 | 1 |



|           |       |                  |               |   |   |
|-----------|-------|------------------|---------------|---|---|
| GRIN1     | chr9  | 140052831/A//T   | nonsynonymous | 0 | 1 |
| GRK5      | chr10 | 121190924/C//T   | nonsynonymous | 0 | 1 |
| MUC6      | chr11 | 1027183/T//C     | nonsynonymous | 0 | 1 |
| OR52E4    | chr11 | 5906045/A//G     | nonsynonymous | 0 | 1 |
| DCDC5     | chr11 | 30921960/A//G    | synonymous    | 0 | 1 |
| CHST1     | chr11 | 45671886/C//T    | synonymous    | 0 | 1 |
| FOLH1     | chr11 | 49207382/G//T    | nonsynonymous | 0 | 1 |
| SIPA1     | chr11 | 65413711/T//C    | nonsynonymous | 0 | 1 |
| ARAP1     | chr11 | 72408985/G//A    | nonsynonymous | 0 | 1 |
| FAT3      | chr11 | 92086889/A//T    | nonsynonymous | 0 | 1 |
| ATM       | chr11 | 108181023/A//G   | nonsynonymous | 0 | 1 |
| PATE2     | chr11 | 125647313/A//G   | synonymous    | 0 | 1 |
| ITPR2     | chr12 | 26809402/C//A    | nonsynonymous | 0 | 1 |
| PDZRN4    | chr12 | 41900422/G//A    | synonymous    | 0 | 1 |
| KRT5      | chr12 | 52910594/C//T    | synonymous    | 0 | 1 |
| OR6C74    | chr12 | 55641833/C//A    | synonymous    | 0 | 1 |
| OTOGL     | chr12 | 80732968/G//A    | nonsynonymous | 0 | 1 |
| NOS1      | chr12 | 117723963/G//A   | synonymous    | 0 | 1 |
| MPHOSPH9  | chr12 | 123687228/T//C   | nonsynonymous | 0 | 1 |
| EP400     | chr12 | 132514674/G//C   | nonsynonymous | 0 | 1 |
| POSTN     | chr13 | 38138685/C//A    | nonsynonymous | 0 | 1 |
| COL4A1    | chr13 | 110830520/C//T   | synonymous    | 0 | 1 |
| COL4A1    | chr13 | 110959487/G//T   | synonymous    | 0 | 1 |
| TEP1      | chr14 | 20839481/G//A    | synonymous    | 0 | 1 |
| MYH7      | chr14 | 23899003/C//T    | synonymous    | 0 | 1 |
| ISM2      | chr14 | 77941861/G//A    | synonymous    | 0 | 1 |
| GABRB3    | chr15 | 27017587/C//T    | nonsynonymous | 0 | 1 |
| MYO5A     | chr15 | 52611515/G//A    | nonsynonymous | 0 | 1 |
| SPSB3     | chr16 | 1827200/G//T     | nonsynonymous | 0 | 1 |
| CDH11     | chr16 | 64984742/C//T    | nonsynonymous | 0 | 1 |
| E2F4      | chr16 | 67231782/C//A    | nonsynonymous | 0 | 1 |
| CNTNAP4   | chr16 | 76555045/T//G    | nonsynonymous | 0 | 1 |
| C17orf105 | chr17 | 41861215/G//A    | nonsynonymous | 0 | 1 |
| ABCA9     | chr17 | 67012417/T//C    | nonsynonymous | 0 | 1 |
| RNF213    | chr17 | 78272285/CCTT//C | nonsynonymous | 0 | 1 |
| DOT1L     | chr19 | 2217079/G//A     | nonsynonymous | 0 | 1 |
| OR111     | chr19 | 15198492/G//A    | nonsynonymous | 0 | 1 |
| ZNF257    | chr19 | 22272145/C//T    | synonymous    | 0 | 1 |
| SYMPK     | chr19 | 46332369/C//A    | nonsynonymous | 0 | 1 |
| PRKD2     | chr19 | 47177846/G//A    | synonymous    | 0 | 1 |
| ALDH16A1  | chr19 | 49967449/C//G    | nonsynonymous | 0 | 1 |
| RPS11     | chr19 | 49999672/C//G    | synonymous    | 0 | 1 |
| ZNF28     | chr19 | 53304131/C//A    | nonsynonymous | 0 | 1 |
| SIGLEC1   | chr20 | 3687191/C//T     | nonsynonymous | 0 | 1 |
| GZF1      | chr20 | 23346139/C//T    | synonymous    | 0 | 1 |
| KIAA1755  | chr20 | 36869777/C//T    | synonymous    | 0 | 1 |
| LAMA5     | chr20 | 60913540/G//A    | synonymous    | 0 | 1 |
| TIAM1     | chr21 | 32497010/G//T    | nonsynonymous | 0 | 1 |
| DACH2     | chrX  | 85769390/G//A    | synonymous    | 0 | 1 |
| RNF113A   | chrX  | 119004618/T//A   | nonsynonymous | 0 | 1 |
| DCAF12L1  | chrX  | 125685804/C//T   | nonsynonymous | 0 | 1 |
| COLEC11   | chr2  | 3691510/C//T     | synonymous    | 0 | 1 |
| ZDBF2     | chr2  | 207171744/T//C   | nonsynonymous | 0 | 1 |
| UGT2B11   | chr4  | 70070357/T//C    | synonymous    | 0 | 1 |
| SLC6A3    | chr5  | 1420692/C//A     | nonsynonymous | 0 | 1 |
| CHRM2     | chr7  | 136700632/T//C   | synonymous    | 0 | 1 |
| AQP7      | chr9  | 33387004/T//C    | synonymous    | 0 | 1 |
| AQP7      | chr9  | 33387047/T//G    | nonsynonymous | 0 | 1 |
| OR8I2     | chr11 | 55861510/C//A    | nonsynonymous | 0 | 1 |
| DYNC2H1   | chr11 | 103270434/G//A   | nonsynonymous | 0 | 1 |
| OR10G2    | chr14 | 22102374/T//C    | nonsynonymous | 0 | 1 |
| OR10G2    | chr14 | 22102439/C//G    | nonsynonymous | 0 | 1 |
| HSP90AA1  | chr14 | 102552665/A//G   | synonymous    | 0 | 1 |
| GNA15     | chr19 | 3162985/G//A     | nonsynonymous | 0 | 1 |
| C19orf44  | chr19 | 16611599/A//G    | synonymous    | 0 | 1 |
| WDR87     | chr19 | 38377031/C//A    | nonsynonymous | 0 | 1 |
| NPEPL1    | chr20 | 57287597/G//A    | synonymous    | 0 | 1 |
| KIAA1671  | chr22 | 25424835/G//A    | nonsynonymous | 0 | 1 |
| DEPDC5    | chr22 | 32179919/G//A    | nonsynonymous | 0 | 1 |
| GAB3      | chrX  | 153906534/A//G   | nonsynonymous | 0 | 1 |

|           |       |                 |               |   |   |
|-----------|-------|-----------------|---------------|---|---|
| GPR88     | chr1  | 101004688/G//A  | nonsynonymous | 0 | 1 |
| KPRP      | chr1  | 152732963/G//A  | nonsynonymous | 0 | 1 |
| RGS5      | chr1  | 163172659/A//G  | synonymous    | 0 | 1 |
| OR2T3     | chr1  | 248636948/G//A  | synonymous    | 0 | 1 |
| IL17RE    | chr3  | 9957496/A//G    | synonymous    | 0 | 1 |
| CCDC80    | chr3  | 112328836/G//A  | nonsynonymous | 0 | 1 |
| ALG1L2    | chr3  | 129814998/C//G  | nonsynonymous | 0 | 1 |
| FRG1      | chr4  | 190883085/C//T  | synonymous    | 0 | 1 |
| TFAP2A    | chr6  | 10398776/C//T   | synonymous    | 0 | 1 |
| POM121L2  | chr6  | 27277166/G//C   | synonymous    | 0 | 1 |
| ZNF92     | chr7  | 64864085/T//C   | nonsynonymous | 0 | 1 |
| CPSF1     | chr8  | 145620235/G//A  | synonymous    | 0 | 1 |
| ZNF517    | chr8  | 146033687/C//T  | synonymous    | 0 | 1 |
| CNTFR     | chr9  | 34552247/C//T   | nonsynonymous | 0 | 1 |
| CCL21     | chr9  | 34709543/C//G   | nonsynonymous | 0 | 1 |
| IPPK      | chr9  | 95410393/G//A   | nonsynonymous | 0 | 1 |
| MUC5B     | chr11 | 1267968/A//G    | synonymous    | 0 | 1 |
| MUC5B     | chr11 | 1267971/C//A    | synonymous    | 0 | 1 |
| C12orf66  | chr12 | 64588141/A//G   | synonymous    | 0 | 1 |
| METTL17   | chr14 | 21462159/C//T   | nonsynonymous | 0 | 1 |
| MDGA2     | chr14 | 47315052/C//A   | nonsynonymous | 0 | 1 |
| BRF1      | chr14 | 105677604/G//A  | synonymous    | 0 | 1 |
| NLRP1     | chr17 | 5436280/G//A    | nonsynonymous | 0 | 1 |
| SAT2      | chr17 | 7530288/C//G    | nonsynonymous | 0 | 1 |
| NCOR1     | chr17 | 16004573/T//C   | nonsynonymous | 0 | 1 |
| TLCD1     | chr17 | 27052976/T//C   | nonsynonymous | 0 | 1 |
| ADAP2     | chr17 | 29284982/C//T   | synonymous    | 0 | 1 |
| KAT2A     | chr17 | 40266582/C//T   | nonsynonymous | 0 | 1 |
| MC2R      | chr18 | 13885045/C//T   | nonsynonymous | 0 | 1 |
| POLRMT    | chr19 | 622690/C//T     | synonymous    | 0 | 1 |
| PLIN4     | chr19 | 4511108/G//A    | nonsynonymous | 0 | 1 |
| NUDT19    | chr19 | 33183295/C//T   | synonymous    | 0 | 1 |
| TSKS      | chr19 | 50265373/G//A   | nonsynonymous | 0 | 1 |
| KRTAP27-1 | chr21 | 31709564/G//A   | synonymous    | 0 | 1 |
| NEFH      | chr22 | 29879448/G//A   | nonsynonymous | 0 | 1 |
| COL4A6    | chrX  | 107431854/C//T  | nonsynonymous | 0 | 1 |
| LRP8      | chr1  | 53736893/T//C   | synonymous    | 0 | 1 |
| ABCB10    | chr1  | 229654613/T//G  | nonsynonymous | 0 | 1 |
| OR2L8     | chr1  | 248112771/C//T  | synonymous    | 0 | 1 |
| PPM1G     | chr2  | 27632276/A//G   | nonsynonymous | 0 | 1 |
| SPTBN1    | chr2  | 54876745/G//A   | synonymous    | 0 | 1 |
| ATG4B     | chr2  | 242594053/C//T  | nonsynonymous | 0 | 1 |
| ROBO2     | chr3  | 77147399/G//A   | nonsynonymous | 0 | 1 |
|           | chr4  | 5894584/G//A    | synonymous    | 0 | 1 |
| SORCS2    | chr4  | 7691261/G//A    | nonsynonymous | 0 | 1 |
| GRSF1     | chr4  | 71697397/A//G   | synonymous    | 0 | 1 |
| KIAA0922  | chr4  | 154547368/G//A  | nonsynonymous | 0 | 1 |
| LIX1      | chr5  | 96478345/G//A   | synonymous    | 0 | 1 |
| IFT22     | chr7  | 100959796/C//T  | nonsynonymous | 0 | 1 |
| TNKS      | chr8  | 9413559/C//T    | nonsynonymous | 0 | 1 |
| STAB2     | chr12 | 104118858/G//A  | nonsynonymous | 0 | 1 |
| IMP3      | chr15 | 75932199/G//A   | nonsynonymous | 0 | 1 |
| ZNF823    | chr19 | 11833116/A//T   | synonymous    | 0 | 1 |
| CD93      | chr20 | 23065850/G//A   | nonsynonymous | 0 | 1 |
| MYH9      | chr22 | 36696955/T//G   | nonsynonymous | 0 | 1 |
| HS6ST2    | chrX  | 132092606/G//A  | nonsynonymous | 0 | 1 |
| GBP4      | chr1  | 89654416/T//A   | nonsynonymous | 0 | 1 |
| ABCA4     | chr1  | 94466437/T//A   | nonsynonymous | 0 | 1 |
| WDR47     | chr1  | 109553567/A//C  | nonsynonymous | 0 | 1 |
| BOLA1     | chr1  | 149871847/G//A  | nonsynonymous | 0 | 1 |
| FLG2      | chr1  | 152323864/T//A  | nonsynonymous | 0 | 1 |
| TDRD10    | chr1  | 154520087/T//C  | synonymous    | 0 | 1 |
| TPR       | chr1  | 186313680/A//C  | nonsynonymous | 0 | 1 |
| PTGS2     | chr1  | 186648219/C//T  | nonsynonymous | 0 | 1 |
| ZBTB41    | chr1  | 197141337/A//AC | nonsynonymous | 0 | 1 |
| MAP3K21   | chr1  | 233518453/C//G  | nonsynonymous | 0 | 1 |
| OR2L8     | chr1  | 248112899/T//C  | nonsynonymous | 0 | 1 |
| NRXN1     | chr2  | 50699589/C//G   | nonsynonymous | 0 | 1 |
| WDPCP     | chr2  | 63660892/T//A   | nonsynonymous | 0 | 1 |
| AFTPH     | chr2  | 64796313/G//A   | synonymous    | 0 | 1 |

|           |      |                  |               |   |   |
|-----------|------|------------------|---------------|---|---|
| COX5B     | chr2 | 98262589/G//T    | nonsynonymous | 0 | 1 |
|           | chr2 | 143746420/G//A   | synonymous    | 0 | 1 |
| PKD1      | chr2 | 173431579/A//G   | synonymous    | 0 | 1 |
| ANKRD28   | chr3 | 15711970/C//G    | nonsynonymous | 0 | 1 |
| EOMES     | chr3 | 27759208/C//T    | nonsynonymous | 0 | 1 |
| SCN11A    | chr3 | 38941557/G//C    | nonsynonymous | 0 | 1 |
| CSPG5     | chr3 | 47614265/G//A    | synonymous    | 0 | 1 |
| NCKIPSD   | chr3 | 48716861/T//C    | nonsynonymous | 0 | 1 |
| CACNA2D3  | chr3 | 54537677/C//A    | nonsynonymous | 0 | 1 |
| LRTM1     | chr3 | 54959095/G//A    | nonsynonymous | 0 | 1 |
| CADPS     | chr3 | 62478032/C//T    | synonymous    | 0 | 1 |
| ADAMTS9   | chr3 | 64592730/T//A    | nonsynonymous | 0 | 1 |
| PHLDB2    | chr3 | 111604216/G//A   | nonsynonymous | 0 | 1 |
| WDR5B     | chr3 | 122133657/C//T   | nonsynonymous | 0 | 1 |
| HRASLS    | chr3 | 192980753/T//G   | synonymous    | 0 | 1 |
| IDUA      | chr4 | 998145/T//C      | synonymous    | 0 | 1 |
| BOD1L1    | chr4 | 13616214/T//C    | synonymous    | 0 | 1 |
| FBXL5     | chr4 | 15627073/C//G    | nonsynonymous | 0 | 1 |
| WDR19     | chr4 | 39278662/G//C    | nonsynonymous | 0 | 1 |
| MOB1B     | chr4 | 71844964/G//A    | nonsynonymous | 0 | 1 |
| CXCL6     | chr4 | 74702567/C//G    | nonsynonymous | 0 | 1 |
| ANK2      | chr4 | 114275381/G//A   | synonymous    | 0 | 1 |
| FAT4      | chr4 | 126238020/C//T   | nonsynonymous | 0 | 1 |
| FAT4      | chr4 | 126241469/A//C   | nonsynonymous | 0 | 1 |
| FHDC1     | chr4 | 153895897/G//A   | nonsynonymous | 0 | 1 |
| DDX60     | chr4 | 169173813/C//CAT | synonymous    | 0 | 1 |
| ADAM29    | chr4 | 175897313/C//T   | nonsynonymous | 0 | 1 |
| FAT1      | chr4 | 187630570/G//A   | nonsynonymous | 0 | 1 |
| CDH10     | chr5 | 24488147/C//A    | nonsynonymous | 0 | 1 |
| CDH9      | chr5 | 26906907/G//A    | synonymous    | 0 | 1 |
| ADAMTS12  | chr5 | 33596157/G//A    | nonsynonymous | 0 | 1 |
| SPEF2     | chr5 | 35806922/A//C    | nonsynonymous | 0 | 1 |
| LIFR      | chr5 | 38496574/C//T    | nonsynonymous | 0 | 1 |
| GHR       | chr5 | 42719120/G//A    | nonsynonymous | 0 | 1 |
| ADAMTS6   | chr5 | 64587290/G//A    | nonsynonymous | 0 | 1 |
| DMGDH     | chr5 | 78347156/T//A    | nonsynonymous | 0 | 1 |
| DMGDH     | chr5 | 78347158/C//A    | nonsynonymous | 0 | 1 |
| ADGRV1    | chr5 | 90059174/T//G    | nonsynonymous | 0 | 1 |
| SLF1      | chr5 | 94014552/C//G    | nonsynonymous | 0 | 1 |
| SLCO4C1   | chr5 | 101627086/A//AC  | nonsynonymous | 0 | 1 |
| CDO1      | chr5 | 115152120/G//A   | synonymous    | 0 | 1 |
| PCDHA9    | chr5 | 140229441/C//A   | nonsynonymous | 0 | 1 |
| PCDHGA12  | chr5 | 140812292/G//A   | nonsynonymous | 0 | 1 |
| FCHSD1    | chr5 | 141025684/C//G   | nonsynonymous | 0 | 1 |
| SPARC     | chr5 | 151046042/C//T   | nonsynonymous | 0 | 1 |
| DPCR1     | chr6 | 30917791/C//A    | nonsynonymous | 0 | 1 |
| ATF6B     | chr6 | 32086743/A//G    | nonsynonymous | 0 | 1 |
| MTO1      | chr6 | 74189500/G//A    | nonsynonymous | 0 | 1 |
| SENP6     | chr6 | 76372942/G//T    | nonsynonymous | 0 | 1 |
| HTR1E     | chr6 | 87725443/G//A    | nonsynonymous | 0 | 1 |
| SLC16A10  | chr6 | 111498456/C//A   | nonsynonymous | 0 | 1 |
| TSPYL1    | chr6 | 116600332/C//A   | nonsynonymous | 0 | 1 |
| KIAA0408  | chr6 | 127767633/C//A   | nonsynonymous | 0 | 1 |
| C6orf58   | chr6 | 127911337/T//C   | synonymous    | 0 | 1 |
| AKAP7     | chr6 | 131481312/C//G   | nonsynonymous | 0 | 1 |
| EYA4      | chr6 | 133844275/T//C   | synonymous    | 0 | 1 |
| LTV1      | chr6 | 144184395/G//C   | nonsynonymous | 0 | 1 |
| LPA       | chr6 | 160953611/A//G   | synonymous    | 0 | 1 |
| C6orf118  | chr6 | 165695136/T//G   | nonsynonymous | 0 | 1 |
| C7orf50   | chr7 | 1049661/C//T     | nonsynonymous | 0 | 1 |
| TMEM184A  | chr7 | 1586598/T//C     | nonsynonymous | 0 | 1 |
| DGKB      | chr7 | 14647119/A//C    | nonsynonymous | 0 | 1 |
| MYO1G     | chr7 | 45005870/C//T    | nonsynonymous | 0 | 1 |
| FGL2      | chr7 | 76826210/T//A    | nonsynonymous | 0 | 1 |
| KIAA1324L | chr7 | 86688654/G//A    | nonsynonymous | 0 | 1 |
| CYP3A43   | chr7 | 99434170/GT//G   | nonsynonymous | 0 | 1 |
| ZAN       | chr7 | 100377093/C//T   | nonsynonymous | 0 | 1 |
| CUX1      | chr7 | 101844929/C//G   | synonymous    | 0 | 1 |
| LRRN3     | chr7 | 110763472/G//A   | nonsynonymous | 0 | 1 |
| MET       | chr7 | 116340302/T//G   | nonsynonymous | 0 | 1 |

|           |       |                  |               |   |   |
|-----------|-------|------------------|---------------|---|---|
| CADPS2    | chr7  | 122526477/G//A   | synonymous    | 0 | 1 |
| CSMD1     | chr8  | 2976038/C//T     | nonsynonymous | 0 | 1 |
| PREX2     | chr8  | 68972995/A//C    | nonsynonymous | 0 | 1 |
| RIMS2     | chr8  | 104709364/G//C   | nonsynonymous | 0 | 1 |
| DEPTOR    | chr8  | 120940662/G//T   | nonsynonymous | 0 | 1 |
| TMEM215   | chr9  | 32784266/G//A    | nonsynonymous | 0 | 1 |
| NTRK2     | chr9  | 87570408/C//T    | synonymous    | 0 | 1 |
| SHC3      | chr9  | 91692780/G//C    | nonsynonymous | 0 | 1 |
| CTNNAL1   | chr9  | 111714531/C//T   | nonsynonymous | 0 | 1 |
| ZNF79     | chr9  | 130207317/G//A   | synonymous    | 0 | 1 |
| EHMT1     | chr9  | 140712546/G//A   | nonsynonymous | 0 | 1 |
| ADARB2    | chr10 | 1405392/G//A     | nonsynonymous | 0 | 1 |
| ITIH2     | chr10 | 7776906/C//T     | synonymous    | 0 | 1 |
| CELF2     | chr10 | 11207591/G//A    | nonsynonymous | 0 | 1 |
| HTR7      | chr10 | 92509094/G//A    | nonsynonymous | 0 | 1 |
| PDE6C     | chr10 | 95405734/C//A    | nonsynonymous | 0 | 1 |
| CYP2C9    | chr10 | 96708903/G//T    | synonymous    | 0 | 1 |
| SORCS1    | chr10 | 108337210/G//A   | nonsynonymous | 0 | 1 |
| TCF7L2    | chr10 | 114910838/C//CAA | nonsynonymous | 0 | 1 |
| KMT5B     | chr11 | 67934463/T//C    | nonsynonymous | 0 | 1 |
| TPBGL     | chr11 | 74953147/C//T    | synonymous    | 0 | 1 |
| GRM5      | chr11 | 88242270/G//A    | synonymous    | 0 | 1 |
| FAT3      | chr11 | 92087079/T//G    | nonsynonymous | 0 | 1 |
| MTMR2     | chr11 | 95621326/A//T    | nonsynonymous | 0 | 1 |
| C11orf70  | chr11 | 101937390/C//G   | synonymous    | 0 | 1 |
| KBTBD3    | chr11 | 105929645/A//C   | nonsynonymous | 0 | 1 |
| C11orf65  | chr11 | 108253742/A//G   | synonymous    | 0 | 1 |
| TECTA     | chr11 | 120998995/G//A   | nonsynonymous | 0 | 1 |
| KCNJ1     | chr11 | 128709878/G//C   | nonsynonymous | 0 | 1 |
| KIF21A    | chr12 | 39703391/A//G    | nonsynonymous | 0 | 1 |
| PTPRQ     | chr12 | 80935988/A//G    | nonsynonymous | 0 | 1 |
| PAH       | chr12 | 103237547/G//T   | nonsynonymous | 0 | 1 |
| GPN3      | chr12 | 110893657/C//T   | nonsynonymous | 0 | 1 |
| HVCN1     | chr12 | 111087191/T//G   | synonymous    | 0 | 1 |
| MYL2      | chr12 | 111352042/C//T   | synonymous    | 0 | 1 |
| ACAD10    | chr12 | 112150380/C//T   | nonsynonymous | 0 | 1 |
| NOS1      | chr12 | 117725946/G//A   | nonsynonymous | 0 | 1 |
|           | chr13 | 20012304/A//C    | synonymous    | 0 | 1 |
| ATP8A2    | chr13 | 26535756/T//G    | nonsynonymous | 0 | 1 |
| TM9SF2    | chr13 | 100211615/A//G   | nonsynonymous | 0 | 1 |
| OR4K1     | chr14 | 20403822/A//G    | synonymous    | 0 | 1 |
| LRFN5     | chr14 | 42356008/C//T    | synonymous    | 0 | 1 |
| SIX4      | chr14 | 61180671/C//T    | synonymous    | 0 | 1 |
| PLEKHD1   | chr14 | 69992748/C//A    | nonsynonymous | 0 | 1 |
| KNL1      | chr15 | 40914519/G//C    | nonsynonymous | 0 | 1 |
| SEMA6D    | chr15 | 48053199/A//C    | nonsynonymous | 0 | 1 |
| TNFAIP8L3 | chr15 | 51350195/G//T    | nonsynonymous | 0 | 1 |
| CCDC33    | chr15 | 74573129/G//A    | nonsynonymous | 0 | 1 |
| CPEB1     | chr15 | 83226687/G//A    | synonymous    | 0 | 1 |
| AXIN1     | chr16 | 396863/C//A      | nonsynonymous | 0 | 1 |
| COG7      | chr16 | 23464232/C//T    | synonymous    | 0 | 1 |
| FBXL19    | chr16 | 30937119/G//A    | nonsynonymous | 0 | 1 |
| SETD1A    | chr16 | 30977632/C//G    | synonymous    | 0 | 1 |
| CHST6     | chr16 | 75513472/G//A    | synonymous    | 0 | 1 |
| FBXO31    | chr16 | 87368936/G//A    | nonsynonymous | 0 | 1 |
| ZBTB4     | chr17 | 7369429/C//A     | nonsynonymous | 0 | 1 |
| NTN1      | chr17 | 9066156/C//T     | nonsynonymous | 0 | 1 |
| CFAP52    | chr17 | 9515710/C//G     | nonsynonymous | 0 | 1 |
| RHBDL3    | chr17 | 30648226/T//C    | nonsynonymous | 0 | 1 |
| RHBDL3    | chr17 | 30648232/T//C    | nonsynonymous | 0 | 1 |
| LYZL6     | chr17 | 34261790/G//A    | synonymous    | 0 | 1 |
| CD79B     | chr17 | 62006571/G//A    | synonymous    | 0 | 1 |
| ABCA8     | chr17 | 66933232/T//A    | nonsynonymous | 0 | 1 |
| ABCA10    | chr17 | 67190080/C//A    | nonsynonymous | 0 | 1 |
| DNAH17    | chr17 | 76497914/G//C    | nonsynonymous | 0 | 1 |
| PTPRS     | chr19 | 5239059/C//G     | nonsynonymous | 0 | 1 |
| FBN3      | chr19 | 8148241/C//T     | nonsynonymous | 0 | 1 |
| MUC16     | chr19 | 9073404/G//A     | nonsynonymous | 0 | 1 |
| MUC16     | chr19 | 9085788/T//C     | synonymous    | 0 | 1 |
| ZNF699    | chr19 | 9408561/C//T     | nonsynonymous | 0 | 1 |

|             |       |                           |               |   |   |
|-------------|-------|---------------------------|---------------|---|---|
| SAMD1       | chr19 | 14199383/A/C              | nonsynonymous | 0 | 1 |
| MYO9B       | chr19 | 17267758/C/T              | synonymous    | 0 | 1 |
| ZNF536      | chr19 | 31039147/C/T              | nonsynonymous | 0 | 1 |
| UBA2        | chr19 | 34941218/C/T              | nonsynonymous | 0 | 1 |
| ARHGAP33    | chr19 | 36269458/C/G              | nonsynonymous | 0 | 1 |
| MAP4K1      | chr19 | 39098655/G/A              | nonsynonymous | 0 | 1 |
| EXOSC5      | chr19 | 41895666/C/A              | synonymous    | 0 | 1 |
| CEACAM16    | chr19 | 45206938/G/A              | synonymous    | 0 | 1 |
| ZNF175      | chr19 | 52084988/CTCTAAAAGTGAAGAA | nonsynonymous | 0 | 1 |
| ZNF432      | chr19 | 52544824/G/T              | nonsynonymous | 0 | 1 |
| FAM90A27P   | chr19 | 53786091/C/A              | synonymous    | 0 | 1 |
| RPL28       | chr19 | 55903017/C/T              | synonymous    | 0 | 1 |
| SIGLEC1     | chr20 | 3674930/T/C               | nonsynonymous | 0 | 1 |
| RALGAPA2    | chr20 | 20475824/A/T              | synonymous    | 0 | 1 |
| NINL        | chr20 | 25457692/C/G              | synonymous    | 0 | 1 |
| MROH8       | chr20 | 35807732/C/G              | nonsynonymous | 0 | 1 |
| FITM2       | chr20 | 42935651/G/A              | nonsynonymous | 0 | 1 |
| ADARB1      | chr21 | 46624592/G/A              | nonsynonymous | 0 | 1 |
| CRYBB2      | chr22 | 25627698/A/T              | nonsynonymous | 0 | 1 |
| MYO18B      | chr22 | 26164216/G/T              | synonymous    | 0 | 1 |
| APOL3       | chr22 | 36537962/C/T              | synonymous    | 0 | 1 |
| PLXNB2      | chr22 | 50716405/C/A              | nonsynonymous | 0 | 1 |
| LANCL3      | chrX  | 37534963/G/GTA            | nonsynonymous | 0 | 1 |
| ALAS2       | chrX  | 55050278/T/C              | synonymous    | 0 | 1 |
|             | chrX  | 74670592/G/T              | synonymous    | 0 | 1 |
| TAS1R1      | chr1  | 6636512/A/T               | nonsynonymous | 0 | 1 |
| CASP9       | chr1  | 15850603/G/A              | synonymous    | 0 | 1 |
| TCTEX1D4    | chr1  | 45271809/G/A              | nonsynonymous | 0 | 1 |
| AKNAD1      | chr1  | 109359721/A/G             | synonymous    | 0 | 1 |
| RBM15       | chr1  | 110882783/G/A             | synonymous    | 0 | 1 |
| FLG2        | chr1  | 152327637/C/G             | nonsynonymous | 0 | 1 |
| PAQR6       | chr1  | 156215604/G/C             | synonymous    | 0 | 1 |
| DCAF6       | chr1  | 168007647/G/C             | nonsynonymous | 0 | 1 |
| USH2A       | chr1  | 216173882/G/T             | nonsynonymous | 0 | 1 |
| TGFB2       | chr1  | 218614702/T/G             | nonsynonymous | 0 | 1 |
| MARK1       | chr1  | 220835511/A/C             | synonymous    | 0 | 1 |
| MRPL30      | chr2  | 99804690/C/G              | nonsynonymous | 0 | 1 |
| SH3RF3      | chr2  | 110107065/A/G             | nonsynonymous | 0 | 1 |
| CHRNA1      | chr2  | 175624294/G/A             | synonymous    | 0 | 1 |
| CHST13      | chr3  | 126261031/G/A             | synonymous    | 0 | 1 |
| MED12L      | chr3  | 151083757/A/C             | nonsynonymous | 0 | 1 |
| SST         | chr3  | 187386931/G/C             | nonsynonymous | 0 | 1 |
| EPHA5       | chr4  | 66509078/T/C              | synonymous    | 0 | 1 |
| TMPRSS11BNL | chr4  | 69057023/T/C              | synonymous    | 0 | 1 |
| GC          | chr4  | 72618269/G/T              | nonsynonymous | 0 | 1 |
| PTPN13      | chr4  | 87656895/T/C              | nonsynonymous | 0 | 1 |
| COL25A1     | chr4  | 109861803/C/T             | nonsynonymous | 0 | 1 |
| KIAA1109    | chr4  | 123171562/T/G             | nonsynonymous | 0 | 1 |
| CYP4V2      | chr4  | 187131762/C/T             | synonymous    | 0 | 1 |
| RGMB        | chr5  | 98129068/C/T              | synonymous    | 0 | 1 |
| ADRA1B      | chr5  | 159344847/T/C             | nonsynonymous | 0 | 1 |
| POU5F1      | chr6  | 31133754/G/T              | nonsynonymous | 0 | 1 |
| AGER        | chr6  | 32152006/T/C              | synonymous    | 0 | 1 |
| MCM3        | chr6  | 52133910/A/C              | nonsynonymous | 0 | 1 |
| UTRN        | chr6  | 144869799/G/A             | nonsynonymous | 0 | 1 |
| INHBA       | chr7  | 41739915/T/C              | nonsynonymous | 0 | 1 |
| TMEM178B    | chr7  | 141170561/G/C             | nonsynonymous | 0 | 1 |
| CSMD1       | chr8  | 2910040/G/T               | nonsynonymous | 0 | 1 |
| C8orf34     | chr8  | 69380957/A/T              | nonsynonymous | 0 | 1 |
| VPS13A      | chr9  | 79972756/T/A              | nonsynonymous | 0 | 1 |
| LRRRC26     | chr9  | 140063806/T/C             | nonsynonymous | 0 | 1 |
| PFKP        | chr10 | 3172133/C/T               | synonymous    | 0 | 1 |
| MYO3A       | chr10 | 26491909/G/C              | nonsynonymous | 0 | 1 |
| RGR         | chr10 | 86018290/G/A              | synonymous    | 0 | 1 |
| OR10A6      | chr11 | 7949754/A/C               | synonymous    | 0 | 1 |
| OR5B12      | chr11 | 58207053/T/C              | nonsynonymous | 0 | 1 |
| INTS5       | chr11 | 62414893/C/A              | nonsynonymous | 0 | 1 |
| C2CD3       | chr11 | 73834038/C/T              | nonsynonymous | 0 | 1 |
| DLG2        | chr11 | 83674001/A/C              | nonsynonymous | 0 | 1 |
| TRIM49      | chr11 | 89531758/A/G              | nonsynonymous | 0 | 1 |

|             |       |                     |               |   |   |
|-------------|-------|---------------------|---------------|---|---|
| ROBO3       | chr11 | 124740986/C//T      | synonymous    | 0 | 1 |
| C12orf40    | chr12 | 40076501/T//A       | nonsynonymous | 0 | 1 |
| FGD6        | chr12 | 95478416/C//T       | nonsynonymous | 0 | 1 |
| ANKS1B      | chr12 | 99640070/T//C       | nonsynonymous | 0 | 1 |
| CUX2        | chr12 | 111758426/C//T      | synonymous    | 0 | 1 |
| WASF3       | chr13 | 27256798/G//A       | synonymous    | 0 | 1 |
| PCDH8       | chr13 | 53421233/A//G       | nonsynonymous | 0 | 1 |
| CGRRF1      | chr14 | 54976752/C//T       | synonymous    | 0 | 1 |
| CHURC1-FNTB | chr14 | 65381097/C//G       | synonymous    | 0 | 1 |
| UNC13C      | chr15 | 54556597/A//C       | synonymous    | 0 | 1 |
| FBXL8       | chr16 | 67197549/C//T       | synonymous    | 0 | 1 |
| CCL7        | chr17 | 32598239/T//C       | nonsynonymous | 0 | 1 |
| SAMD14      | chr17 | 48193376/A//C       | nonsynonymous | 0 | 1 |
| BCAS3       | chr17 | 59469352/G//T       | nonsynonymous | 0 | 1 |
| ANGPTL6     | chr19 | 10204524/C//A       | nonsynonymous | 0 | 1 |
| ZNF799      | chr19 | 12501533/T//A       | nonsynonymous | 0 | 1 |
| ZNF208      | chr19 | 22157509/C//A       | nonsynonymous | 0 | 1 |
| ZNF675      | chr19 | 23836892/C//T       | synonymous    | 0 | 1 |
| ZNF254      | chr19 | 24309169/A//C       | synonymous    | 0 | 1 |
| PRX         | chr19 | 40902575/C//T       | nonsynonymous | 0 | 1 |
| ZNF613      | chr19 | 52448441/A//G       | synonymous    | 0 | 1 |
| KIZ         | chr20 | 21112769/C//G       | nonsynonymous | 0 | 1 |
| KCNQ2       | chr20 | 62065222/C//T       | nonsynonymous | 0 | 1 |
| APP         | chr21 | 27284171/C//G       | nonsynonymous | 0 | 1 |
| SLC19A1     | chr21 | 46951781/G//A       | synonymous    | 0 | 1 |
| RFPL3       | chr22 | 32754177/GT//G      | nonsynonymous | 0 | 1 |
| TOM1        | chr22 | 35734732/C//G       | nonsynonymous | 0 | 1 |
| DMD         | chrX  | 32404421/A//T       | synonymous    | 0 | 1 |
| SSX1        | chrX  | 48117273/C//G       | nonsynonymous | 0 | 1 |
| CACNA1F     | chrX  | 49083115/C//A       | nonsynonymous | 0 | 1 |
| MTRNR2L10   | chrX  | 55208369/G//A       | nonsynonymous | 0 | 1 |
| ATRX        | chrX  | 76890106/C//A       | nonsynonymous | 0 | 1 |
| CYSLTR1     | chrX  | 77529090/A//C       | nonsynonymous | 0 | 1 |
|             | chrX  | 107018697/G//T      | synonymous    | 0 | 1 |
| AMELY       | chrY  | 6736361/C//T        | nonsynonymous | 0 | 1 |
| PER3        | chr1  | 7886767/C//T        | nonsynonymous | 0 | 1 |
| CSF3R       | chr1  | 36938246/G//T       | nonsynonymous | 0 | 1 |
| RLF         | chr1  | 40627064/G//T       | synonymous    | 0 | 1 |
| CDKN2C      | chr1  | 51439845/G//T       | nonsynonymous | 0 | 1 |
| TTC39A      | chr1  | 51771756/G//T       | synonymous    | 0 | 1 |
| IL23R       | chr1  | 67666529/G//C       | nonsynonymous | 0 | 1 |
| MCOLN3      | chr1  | 85484819/C//A       | nonsynonymous | 0 | 1 |
| SLC16A4     | chr1  | 110919695/G//A      | synonymous    | 0 | 1 |
| LRIF1       | chr1  | 111494810/T//C      | synonymous    | 0 | 1 |
| SYCP1       | chr1  | 115520175/T//G      | synonymous    | 0 | 1 |
|             | chr1  | 170994516/T//G      | synonymous    | 0 | 1 |
| SMG7        | chr1  | 183511378/C//T      | nonsynonymous | 0 | 1 |
| SRBD1       | chr2  | 45773916/T//A       | nonsynonymous | 0 | 1 |
| EML6        | chr2  | 55040366/CAGCCTT//C | nonsynonymous | 0 | 1 |
| CCDC85A     | chr2  | 56603050/C//A       | nonsynonymous | 0 | 1 |
| DNAH6       | chr2  | 84811319/G//C       | nonsynonymous | 0 | 1 |
| RNF103      | chr2  | 86831702/T//G       | nonsynonymous | 0 | 1 |
| SMPD4       | chr2  | 130914236/C//A      | synonymous    | 0 | 1 |
| SCN1A       | chr2  | 166908496/G//T      | nonsynonymous | 0 | 1 |
| XIRP2       | chr2  | 168105810/A//G      | synonymous    | 0 | 1 |
| FRZB        | chr2  | 183699520/C//A      | synonymous    | 0 | 1 |
| TNS1        | chr2  | 218669221/G//A      | synonymous    | 0 | 1 |
| SPEG        | chr2  | 220313389/C//T      | synonymous    | 0 | 1 |
| NGEF        | chr2  | 233839551/G//T      | nonsynonymous | 0 | 1 |
| TGFBR2      | chr3  | 30713791/G//C       | nonsynonymous | 0 | 1 |
| TGM4        | chr3  | 44948474/C//T       | nonsynonymous | 0 | 1 |
| GPR27       | chr3  | 71803637/C//A       | nonsynonymous | 0 | 1 |
| PDZRN3      | chr3  | 73433708/G//T       | nonsynonymous | 0 | 1 |
| ZNF717      | chr3  | 75787218/T//C       | nonsynonymous | 0 | 1 |
| HTR1F       | chr3  | 88039863/C//A       | synonymous    | 0 | 1 |
| LRRC58      | chr3  | 120067775/G//C      | nonsynonymous | 0 | 1 |
| TSC22D2     | chr3  | 150127116/C//G      | synonymous    | 0 | 1 |
| KLHL6       | chr3  | 183225967/T//C      | synonymous    | 0 | 1 |
| PTPN13      | chr4  | 87593630/T//C       | nonsynonymous | 0 | 1 |
| PPP3CA      | chr4  | 102267975/G//C      | synonymous    | 0 | 1 |

|          |       |                           |               |   |   |
|----------|-------|---------------------------|---------------|---|---|
| NAA15    | chr4  | 140265403/C//T            | nonsynonymous | 0 | 1 |
| ADAMTS16 | chr5  | 5186209/G//T              | nonsynonymous | 0 | 1 |
| UGT3A2   | chr5  | 36052057/C//A             | nonsynonymous | 0 | 1 |
| PARP8    | chr5  | 50129857/C//G             | nonsynonymous | 0 | 1 |
| PIK3R1   | chr5  | 67589574/GGAAAAAATTACATGA | nonsynonymous | 0 | 1 |
|          | chr6  | 35705074/G//A             | synonymous    | 0 | 1 |
| DNAH8    | chr6  | 38858464/G//A             | nonsynonymous | 0 | 1 |
| HSP90AB1 | chr6  | 44218342/A//G             | synonymous    | 0 | 1 |
| DDX43    | chr6  | 74111602/G//C             | nonsynonymous | 0 | 1 |
| MANEA    | chr6  | 96053987/C//T             | synonymous    | 0 | 1 |
| SCML4    | chr6  | 108068024/G//A            | nonsynonymous | 0 | 1 |
| LACE1    | chr6  | 108616325/A//C            | nonsynonymous | 0 | 1 |
| GPR6     | chr6  | 110300310/G//C            | synonymous    | 0 | 1 |
| COL10A1  | chr6  | 116442378/G//A            | nonsynonymous | 0 | 1 |
| TCP10    | chr6  | 167791530/G//C            | nonsynonymous | 0 | 1 |
| SDK1     | chr7  | 4260992/C//G              | synonymous    | 0 | 1 |
| DAGLB    | chr7  | 6461424/C//T              | synonymous    | 0 | 1 |
| C7orf57  | chr7  | 48086215/T//C             | nonsynonymous | 0 | 1 |
| WBSCR17  | chr7  | 71036376/C//A             | nonsynonymous | 0 | 1 |
| RELN     | chr7  | 103155697/G//T            | nonsynonymous | 0 | 1 |
| FSCN3    | chr7  | 127235689/G//T            | nonsynonymous | 0 | 1 |
| TTC26    | chr7  | 138818562/G//C            | synonymous    | 0 | 1 |
| CUL1     | chr7  | 148457582/G//C            | nonsynonymous | 0 | 1 |
| DNAJB6   | chr7  | 157202641/G//A            | nonsynonymous | 0 | 1 |
| CHD7     | chr8  | 61754266/A//G             | nonsynonymous | 0 | 1 |
| CHD7     | chr8  | 61761133/C//T             | nonsynonymous | 0 | 1 |
| SCRIB    | chr8  | 144895008/G//A            | nonsynonymous | 0 | 1 |
| GPR158   | chr10 | 25886807/G//T             | nonsynonymous | 0 | 1 |
| MAP3K8   | chr10 | 30736861/A//G             | nonsynonymous | 0 | 1 |
| PRKG1    | chr10 | 53564414/T//A             | nonsynonymous | 0 | 1 |
| PCDH15   | chr10 | 56287643/G//C             | synonymous    | 0 | 1 |
| KCNMA1   | chr10 | 78729766/G//A             | nonsynonymous | 0 | 1 |
| MINPP1   | chr10 | 89264575/G//T             | synonymous    | 0 | 1 |
| ZDHHC16  | chr10 | 99213550/C//A             | synonymous    | 0 | 1 |
| AFAP1L2  | chr10 | 116091655/C//G            | synonymous    | 0 | 1 |
| ATE1     | chr10 | 123661984/C//A            | nonsynonymous | 0 | 1 |
| AMPD3    | chr11 | 10521628/CCCAGGTGACGGGT   | nonsynonymous | 0 | 1 |
| FLRT1    | chr11 | 63883796/G//A             | synonymous    | 0 | 1 |
| SYVN1    | chr11 | 64897536/C//A             | nonsynonymous | 0 | 1 |
| DLG2     | chr11 | 83173087/G//A             | nonsynonymous | 0 | 1 |
| GPR83    | chr11 | 94113814/G//A             | nonsynonymous | 0 | 1 |
| CLMP     | chr11 | 122945531/C//G            | nonsynonymous | 0 | 1 |
| NCAPD3   | chr11 | 134022796/C//T            | synonymous    | 0 | 1 |
| LRTM2    | chr12 | 1943993/C//A              | synonymous    | 0 | 1 |
| GALNT8   | chr12 | 4870122/A//T              | nonsynonymous | 0 | 1 |
| TAS2R20  | chr12 | 11149643/T//G             | nonsynonymous | 0 | 1 |
| PYM1     | chr12 | 56321588/C//A             | synonymous    | 0 | 1 |
| PPM1H    | chr12 | 63328479/A//G             | nonsynonymous | 0 | 1 |
| BBS10    | chr12 | 76740364/C//T             | synonymous    | 0 | 1 |
| ACSS3    | chr12 | 81472027/G//C             | nonsynonymous | 0 | 1 |
| TMTC2    | chr12 | 83290079/C//G             | nonsynonymous | 0 | 1 |
| LRRIQ1   | chr12 | 85531631/G//T             | nonsynonymous | 0 | 1 |
| UTP20    | chr12 | 101748719/G//T            | synonymous    | 0 | 1 |
| SDSL     | chr12 | 113866247/A//G            | nonsynonymous | 0 | 1 |
| SBNO1    | chr12 | 123829949/C//T            | nonsynonymous | 0 | 1 |
| DNAH10   | chr12 | 124325871/G//C            | nonsynonymous | 0 | 1 |
| KLHL1    | chr13 | 70413144/T//G             | nonsynonymous | 0 | 1 |
| GPC5     | chr13 | 92345496/C//T             | synonymous    | 0 | 1 |
| GPR180   | chr13 | 95264524/A//T             | nonsynonymous | 0 | 1 |
| CCDC168  | chr13 | 103395430/C//T            | synonymous    | 0 | 1 |
| IRS2     | chr13 | 110435765/C//T            | nonsynonymous | 0 | 1 |
|          | chr14 | 35515656/C//A             | synonymous    | 0 | 1 |
| CLEC14A  | chr14 | 38724597/C//T             | nonsynonymous | 0 | 1 |
| KIAA0586 | chr14 | 58938969/A//G             | nonsynonymous | 0 | 1 |
| KLC1     | chr14 | 104167582/G//C            | synonymous    | 0 | 1 |
| MTA1     | chr14 | 105920636/TGTTAAAAGAAGGTA | nonsynonymous | 0 | 1 |
| ANPEP    | chr15 | 90347789/G//T             | nonsynonymous | 0 | 1 |
| GNPTG    | chr16 | 1412233/C//A              | nonsynonymous | 0 | 1 |
| CLCN7    | chr16 | 1510851/G//A              | synonymous    | 0 | 1 |
| SPN      | chr16 | 29675937/T//A             | synonymous    | 0 | 1 |

|           |       |                           |               |   |   |
|-----------|-------|---------------------------|---------------|---|---|
| HYDIN     | chr16 | 71096235/A/T              | nonsynonymous | 0 | 1 |
| TP53      | chr17 | 7578405/GC/G              | nonsynonymous | 0 | 1 |
| NTN1      | chr17 | 8925798/G//A              | synonymous    | 0 | 1 |
| KIAA0100  | chr17 | 26964079/C//T             | synonymous    | 0 | 1 |
| AARSD1    | chr17 | 41103846/T//A             | synonymous    | 0 | 1 |
| PPY       | chr17 | 42018835/G//T             | nonsynonymous | 0 | 1 |
| DCAKD     | chr17 | 43112154/T//C             | nonsynonymous | 0 | 1 |
| COL1A1    | chr17 | 48268813/G//C             | synonymous    | 0 | 1 |
| FOXK2     | chr17 | 80543822/G//A             | nonsynonymous | 0 | 1 |
| CABYR     | chr18 | 21736331/C//A             | nonsynonymous | 0 | 1 |
| PSTPIP2   | chr18 | 43604637/C//A             | nonsynonymous | 0 | 1 |
| SALL3     | chr18 | 76754709/G//T             | synonymous    | 0 | 1 |
| VAV1      | chr19 | 6854014/G//T              | nonsynonymous | 0 | 1 |
| MUC16     | chr19 | 9062872/T//C              | nonsynonymous | 0 | 1 |
| SMARCA4   | chr19 | 11123738/C//T             | synonymous    | 0 | 1 |
| HOOK2     | chr19 | 12880903/G//C             | synonymous    | 0 | 1 |
|           | chr19 | 12936804/T//A             | synonymous    | 0 | 1 |
| ADGRL1    | chr19 | 14272368/C//T             | synonymous    | 0 | 1 |
| ILVBL     | chr19 | 15226677/G//A             | nonsynonymous | 0 | 1 |
| UPF1      | chr19 | 18942937/G//T             | synonymous    | 0 | 1 |
| ZNF676    | chr19 | 22375863/C//A             | nonsynonymous | 0 | 1 |
| ZNF98     | chr19 | 22574914/C//G             | nonsynonymous | 0 | 1 |
| WDR62     | chr19 | 36592920/C//T             | synonymous    | 0 | 1 |
| RYR1      | chr19 | 38957043/G//C             | synonymous    | 0 | 1 |
| SUPT5H    | chr19 | 39948308/G//T             | synonymous    | 0 | 1 |
| IRF2BP1   | chr19 | 46387930/C//G             | nonsynonymous | 0 | 1 |
| ZNF649    | chr19 | 52394929/C//T             | nonsynonymous | 0 | 1 |
| ZNF677    | chr19 | 53741539/C//G             | nonsynonymous | 0 | 1 |
| EPN1      | chr19 | 56203244/G//T             | nonsynonymous | 0 | 1 |
| AURKC     | chr19 | 57744875/A//G             | synonymous    | 0 | 1 |
| FOXA2     | chr20 | 22562499/T//A             | nonsynonymous | 0 | 1 |
| BPIFB4    | chr20 | 31671458/T//A             | nonsynonymous | 0 | 1 |
| ARFGEF2   | chr20 | 47628474/G//A             | synonymous    | 0 | 1 |
| SYCP2     | chr20 | 58476774/G//A             | synonymous    | 0 | 1 |
| COL20A1   | chr20 | 61950467/A//T             | synonymous    | 0 | 1 |
| APP       | chr21 | 27394181/TGTG//T          | nonsynonymous | 0 | 1 |
| TIAM1     | chr21 | 32638475/T//C             | nonsynonymous | 0 | 1 |
| KRTAP10-1 | chr21 | 45959386/G//A             | synonymous    | 0 | 1 |
| GAB4      | chr22 | 17488859/G//C             | nonsynonymous | 0 | 1 |
| ASCC2     | chr22 | 30198104/C//G             | nonsynonymous | 0 | 1 |
| MTMR3     | chr22 | 30416422/G//C             | nonsynonymous | 0 | 1 |
| SEC14L3   | chr22 | 30855999/G//T             | synonymous    | 0 | 1 |
| P2RY8     | chrX  | 1584955/GGGTAGGTGAGATC//G | nonsynonymous | 0 | 1 |
| CFAP47    | chrX  | 36091459/T//C             | nonsynonymous | 0 | 1 |
| FUNDC1    | chrX  | 44397766/T//C             | nonsynonymous | 0 | 1 |
| STARD8    | chrX  | 67938362/A//G             | nonsynonymous | 0 | 1 |
| ZCCHC5    | chrX  | 77913799/A//T             | nonsynonymous | 0 | 1 |
| KLHL4     | chrX  | 86890720/G//T             | nonsynonymous | 0 | 1 |
| HS6ST2    | chrX  | 132092392/C//G            | nonsynonymous | 0 | 1 |
| KAZN      | chr1  | 15429876/C//G             | nonsynonymous | 1 | 0 |
| ASAP3     | chr1  | 23782493/G//A             | nonsynonymous | 1 | 0 |
| ATPIF1    | chr1  | 28564419/A//G             | nonsynonymous | 1 | 0 |
| KPNA6     | chr1  | 32623912/G//T             | nonsynonymous | 1 | 0 |
| USP1      | chr1  | 62916297/T//C             | nonsynonymous | 1 | 0 |
| WLS       | chr1  | 68619231/T//C             | nonsynonymous | 1 | 0 |
| CLCA2     | chr1  | 86921100/A//ACAGCAAT      | nonsynonymous | 1 | 0 |
| KCND3     | chr1  | 112524680/C//T            | synonymous    | 1 | 0 |
| RHBG      | chr1  | 156354353/C//A            | synonymous    | 1 | 0 |
| SPTA1     | chr1  | 158626363/G//A            | synonymous    | 1 | 0 |
| ACKR1     | chr1  | 159175253/G//A            | synonymous    | 1 | 0 |
| NUF2      | chr1  | 163307804/T//C            | synonymous    | 1 | 0 |
| XCL2      | chr1  | 168510224/T//G            | nonsynonymous | 1 | 0 |
| SELE      | chr1  | 169702130/A//C            | nonsynonymous | 1 | 0 |
| TNR       | chr1  | 175372637/C//T            | synonymous    | 1 | 0 |
| EDEM3     | chr1  | 184718682/A//G            | nonsynonymous | 1 | 0 |
| KIF21B    | chr1  | 200968470/CA//C           | synonymous    | 1 | 0 |
| COLEC11   | chr2  | 3652045/G//C              | nonsynonymous | 1 | 0 |
| KLF11     | chr2  | 10186482/C//A             | nonsynonymous | 1 | 0 |
| GREB1     | chr2  | 11696830/C//G             | nonsynonymous | 1 | 0 |
| TRIB2     | chr2  | 12880828/G//A             | nonsynonymous | 1 | 0 |



|           |       |                   |               |   |   |
|-----------|-------|-------------------|---------------|---|---|
| BCL11A    | chr2  | 60688221/G//A     | nonsynonymous | 1 | 0 |
| DYSF      | chr2  | 71883367/C//T     | nonsynonymous | 1 | 0 |
| MAP4K4    | chr2  | 102481432/G//A    | nonsynonymous | 1 | 0 |
| AMER3     | chr2  | 131520234/C//A    | synonymous    | 1 | 0 |
| TTN       | chr2  | 179593297/G//A    | synonymous    | 1 | 0 |
| TTN       | chr2  | 179635145/C//A    | nonsynonymous | 1 | 0 |
| C2orf88   | chr2  | 191064757/G//A    | synonymous    | 1 | 0 |
| CUL3      | chr2  | 225370767/G//A    | nonsynonymous | 1 | 0 |
| ITPR1     | chr3  | 4808288/G//T      | nonsynonymous | 1 | 0 |
| LTF       | chr3  | 46491995/C//T     | nonsynonymous | 1 | 0 |
| PTPN23    | chr3  | 47451029/G//GCGGC | nonsynonymous | 1 | 0 |
| PFKFB4    | chr3  | 48563095/C//A     | nonsynonymous | 1 | 0 |
| TBC1D23   | chr3  | 99998573/T//C     | nonsynonymous | 1 | 0 |
| IMPG2     | chr3  | 100948239/A//C    | nonsynonymous | 1 | 0 |
| IMPG2     | chr3  | 100961632/G//A    | synonymous    | 1 | 0 |
| SEMA5B    | chr3  | 122631758/C//T    | nonsynonymous | 1 | 0 |
| ECE2      | chr3  | 183994760/G//A    | synonymous    | 1 | 0 |
| ADAMTS16  | chr5  | 5182228/C//T      | synonymous    | 1 | 0 |
| CTNND2    | chr5  | 11397248/C//T     | synonymous    | 1 | 0 |
| LIFR      | chr5  | 38523515/A//G     | synonymous    | 1 | 0 |
| PAIP1     | chr5  | 43535629/T//C     | synonymous    | 1 | 0 |
| VCAN      | chr5  | 82817214/C//A     | nonsynonymous | 1 | 0 |
| EPB41L4A  | chr5  | 111519775/C//A    | nonsynonymous | 1 | 0 |
| FBN2      | chr5  | 127625637/C//A    | nonsynonymous | 1 | 0 |
| FBN2      | chr5  | 127700375/C//G    | synonymous    | 1 | 0 |
| FSTL4     | chr5  | 132648346/G//A    | nonsynonymous | 1 | 0 |
| PSD2      | chr5  | 139221974/G//A    | nonsynonymous | 1 | 0 |
| PCDHB10   | chr5  | 140572037/C//A    | synonymous    | 1 | 0 |
| HIST1H2AH | chr6  | 27114865/G//A     | synonymous    | 1 | 0 |
| ABCF1     | chr6  | 30550289/G//C     | synonymous    | 1 | 0 |
| COL11A2   | chr6  | 33147254/C//T     | nonsynonymous | 1 | 0 |
| GRM4      | chr6  | 34100974/C//T     | synonymous    | 1 | 0 |
| NUP43     | chr6  | 150067093/C//G    | nonsynonymous | 1 | 0 |
| PARK2     | chr6  | 163148804/C//T    | synonymous    | 1 | 0 |
| AMZ1      | chr7  | 2748254/C//A      | nonsynonymous | 1 | 0 |
| CCDC129   | chr7  | 31617854/C//A     | nonsynonymous | 1 | 0 |
| RFC2      | chr7  | 73668649/G//A     | nonsynonymous | 1 | 0 |
| POMZP3    | chr7  | 76240779/C//T     | synonymous    | 1 | 0 |
| SEMA3A    | chr7  | 83606502/G//A     | nonsynonymous | 1 | 0 |
| LRRD1     | chr7  | 91774285/G//A     | nonsynonymous | 1 | 0 |
| ZAN       | chr7  | 100336106/C//T    | synonymous    | 1 | 0 |
| LRRC61    | chr7  | 150034397/A//C    | synonymous    | 1 | 0 |
| RB1CC1    | chr8  | 53586528/C//T     | synonymous    | 1 | 0 |
| PENK      | chr8  | 57354267/T//A     | nonsynonymous | 1 | 0 |
| CYP7B1    | chr8  | 65509153/G//A     | synonymous    | 1 | 0 |
| SLC7A13   | chr8  | 87229781/G//A     | nonsynonymous | 1 | 0 |
| SLC7A13   | chr8  | 87242055/C//T     | nonsynonymous | 1 | 0 |
| FBXO43    | chr8  | 101152927/C//T    | nonsynonymous | 1 | 0 |
| ATP6V1C1  | chr8  | 104065051/G//A    | nonsynonymous | 1 | 0 |
| NOV       | chr8  | 120430340/G//A    | nonsynonymous | 1 | 0 |
| TRPM6     | chr9  | 77354770/C//T     | nonsynonymous | 1 | 0 |
| ACTL7A    | chr9  | 111625032/G//A    | nonsynonymous | 1 | 0 |
| WDFY4     | chr10 | 49939411/G//A     | synonymous    | 1 | 0 |
| WDFY4     | chr10 | 50025361/C//T     | synonymous    | 1 | 0 |
| ADAMTS14  | chr10 | 72434378/G//A     | nonsynonymous | 1 | 0 |
| MUC6      | chr11 | 1023653/C//T      | nonsynonymous | 1 | 0 |
| MUC5B     | chr11 | 1248622/G//C      | nonsynonymous | 1 | 0 |
| MUC5B     | chr11 | 1276480/G//C      | nonsynonymous | 1 | 0 |
| PRKCDBP   | chr11 | 6340514/G//A      | nonsynonymous | 1 | 0 |
| MYBPC3    | chr11 | 47353389/T//C     | synonymous    | 1 | 0 |
| IGHMBP2   | chr11 | 68678981/A//G     | synonymous    | 1 | 0 |
| FAT3      | chr11 | 92616284/T//G     | nonsynonymous | 1 | 0 |
| FOXR1     | chr11 | 118842525/G//A    | synonymous    | 1 | 0 |
| ETS1      | chr11 | 128332460/T//C    | synonymous    | 1 | 0 |
| LRRK2     | chr12 | 40758787/G//A     | nonsynonymous | 1 | 0 |
| NAV3      | chr12 | 78594291/G//T     | nonsynonymous | 1 | 0 |
| APAF1     | chr12 | 99056542/G//C     | nonsynonymous | 1 | 0 |
| FBXO21    | chr12 | 117612500/A//T    | nonsynonymous | 1 | 0 |
| KDM2B     | chr12 | 121947789/T//C    | nonsynonymous | 1 | 0 |
| CENPJ     | chr13 | 25486895/G//C     | nonsynonymous | 1 | 0 |

|          |       |                |               |   |   |
|----------|-------|----------------|---------------|---|---|
| FREM2    | chr13 | 39448724/G//T  | nonsynonymous | 1 | 0 |
| VPS36    | chr13 | 52997750/T//A  | nonsynonymous | 1 | 0 |
| RNF219   | chr13 | 79190883/C//T  | nonsynonymous | 1 | 0 |
| CCDC168  | chr13 | 103387740/G//T | nonsynonymous | 1 | 0 |
| MYO16    | chr13 | 109779873/C//T | synonymous    | 1 | 0 |
| RIN3     | chr14 | 93119135/C//T  | nonsynonymous | 1 | 0 |
| UNC79    | chr14 | 93994980/A//T  | nonsynonymous | 1 | 0 |
| FBN1     | chr15 | 48722874/A//T  | nonsynonymous | 1 | 0 |
| LIPC     | chr15 | 58830528/G//A  | synonymous    | 1 | 0 |
| TLE3     | chr15 | 70348685/C//T  | nonsynonymous | 1 | 0 |
| PML      | chr15 | 74337355/G//C  | synonymous    | 1 | 0 |
| PCSK6    | chr15 | 101933442/C//T | nonsynonymous | 1 | 0 |
| LMF1     | chr16 | 919948/G//A    | nonsynonymous | 1 | 0 |
| LITAF    | chr16 | 11650407/C//T  | synonymous    | 1 | 0 |
| E2F4     | chr16 | 67226156/C//T  | nonsynonymous | 1 | 0 |
| UTP4     | chr16 | 69167365/G//A  | nonsynonymous | 1 | 0 |
| ZNF469   | chr16 | 88495363/C//A  | synonymous    | 1 | 0 |
| SMCR8    | chr17 | 18219586/C//G  | nonsynonymous | 1 | 0 |
| KIAA0100 | chr17 | 26944322/A//G  | synonymous    | 1 | 0 |
| SLFN13   | chr17 | 33772664/T//C  | synonymous    | 1 | 0 |
| DHX58    | chr17 | 40257919/G//C  | nonsynonymous | 1 | 0 |
| PSMC5    | chr17 | 61908487/G//C  | synonymous    | 1 | 0 |
| BPTF     | chr17 | 65920677/A//G  | nonsynonymous | 1 | 0 |
| NPLOC4   | chr17 | 79580474/A//G  | nonsynonymous | 1 | 0 |
| SMAD4    | chr18 | 48593533/G//T  | nonsynonymous | 1 | 0 |
| PTPRS    | chr19 | 5215339/C//T   | nonsynonymous | 1 | 0 |
| PNPLA6   | chr19 | 7605116/C//T   | synonymous    | 1 | 0 |
| MUC16    | chr19 | 9076366/T//G   | nonsynonymous | 1 | 0 |
| ZNF91    | chr19 | 23542477/C//T  | nonsynonymous | 1 | 0 |
| ZNF569   | chr19 | 37903710/T//C  | nonsynonymous | 1 | 0 |
| SIPA1L3  | chr19 | 38573328/G//A  | nonsynonymous | 1 | 0 |
| GPR4     | chr19 | 46094222/C//A  | synonymous    | 1 | 0 |
| CCDC61   | chr19 | 46506405/G//T  | synonymous    | 1 | 0 |
| GRWD1    | chr19 | 48953982/G//A  | nonsynonymous | 1 | 0 |
| NLRP13   | chr19 | 56419313/CG//C | nonsynonymous | 1 | 0 |
| ACSS1    | chr20 | 25004250/T//C  | nonsynonymous | 1 | 0 |
| MYLK2    | chr20 | 30421551/G//A  | nonsynonymous | 1 | 0 |
| SLC32A1  | chr20 | 37353531/G//T  | nonsynonymous | 1 | 0 |
| ZHX3     | chr20 | 39830767/C//A  | nonsynonymous | 1 | 0 |
| PRPF6    | chr20 | 62616366/G//A  | nonsynonymous | 1 | 0 |
| C22orf31 | chr22 | 29455047/G//A  | nonsynonymous | 1 | 0 |
| CERK     | chr22 | 47116047/C//A  | nonsynonymous | 1 | 0 |
| RBMX     | chrX  | 135961593/T//C | synonymous    | 1 | 0 |
| SLITRK4  | chrX  | 142716991/C//T | nonsynonymous | 1 | 0 |
| ZBTB40   | chr1  | 22816680/C//T  | nonsynonymous | 0 | 1 |
| NIPAL3   | chr1  | 24771720/C//T  | nonsynonymous | 0 | 1 |
| HIVEP3   | chr1  | 42048132/C//G  | nonsynonymous | 0 | 1 |
| TOE1     | chr1  | 45806998/G//C  | nonsynonymous | 0 | 1 |
| LRRC41   | chr1  | 46745207/G//A  | synonymous    | 0 | 1 |
| ITGB3BP  | chr1  | 63919611/C//G  | nonsynonymous | 0 | 1 |
| CGN      | chr1  | 151506506/G//A | nonsynonymous | 0 | 1 |
| GPR25    | chr1  | 200842961/G//A | nonsynonymous | 0 | 1 |
| MIR3620  | chr1  | 228284975/G//C | synonymous    | 0 | 1 |
| RYR2     | chr1  | 237881776/T//A | nonsynonymous | 0 | 1 |
| OSR1     | chr2  | 19553320/G//A  | nonsynonymous | 0 | 1 |
| USP34    | chr2  | 61439008/C//G  | nonsynonymous | 0 | 1 |
| FER1L5   | chr2  | 97359669/C//T  | nonsynonymous | 0 | 1 |
| ANKRD23  | chr2  | 97505819/G//C  | nonsynonymous | 0 | 1 |
| CLASP1   | chr2  | 122216532/C//T | nonsynonymous | 0 | 1 |
| HECW2    | chr2  | 197183624/C//G | nonsynonymous | 0 | 1 |
| ALPI     | chr2  | 233321301/C//A | nonsynonymous | 0 | 1 |
| ZNF660   | chr3  | 44636119/G//A  | nonsynonymous | 0 | 1 |
| CTNND2   | chr5  | 11565087/C//T  | nonsynonymous | 0 | 1 |
| MYOZ3    | chr5  | 150042509/C//A | synonymous    | 0 | 1 |
| SLIT3    | chr5  | 168216618/C//G | nonsynonymous | 0 | 1 |
| PRRC2A   | chr6  | 31599524/G//A  | nonsynonymous | 0 | 1 |
| FAM184A  | chr6  | 119345733/T//C | synonymous    | 0 | 1 |
| MYBL1    | chr8  | 67507872/A//G  | synonymous    | 0 | 1 |
| MPDZ     | chr9  | 13217243/T//C  | synonymous    | 0 | 1 |
| PSAT1    | chr9  | 80943008/C//T  | nonsynonymous | 0 | 1 |

|                 |       |                    |               |   |   |
|-----------------|-------|--------------------|---------------|---|---|
| LOC100505478    | chr9  | 117434068/G//C     | synonymous    | 0 | 1 |
| SET             | chr9  | 131455933/C//T     | nonsynonymous | 0 | 1 |
| MAMDC4          | chr9  | 139749944/G//A     | synonymous    | 0 | 1 |
| PRTFDC1         | chr10 | 25226229/G//C      | nonsynonymous | 0 | 1 |
| CFAP46          | chr10 | 134659655/G//T     | nonsynonymous | 0 | 1 |
| SCT             | chr11 | 626791/T//C        | nonsynonymous | 0 | 1 |
| DCHS1           | chr11 | 6648478/G//T       | nonsynonymous | 0 | 1 |
| LUZP2           | chr11 | 24759827/A//T      | nonsynonymous | 0 | 1 |
| AHNAK           | chr11 | 62288500/G//T      | nonsynonymous | 0 | 1 |
| UCP3            | chr11 | 73716830/A//T      | synonymous    | 0 | 1 |
| ARHGEF12        | chr11 | 120348889/C//A     | nonsynonymous | 0 | 1 |
| FLT3            | chr13 | 28624352/C//A      | nonsynonymous | 0 | 1 |
| SLC7A1          | chr13 | 30097618/C//G      | nonsynonymous | 0 | 1 |
| SPERT           | chr13 | 46287373/C//T      | synonymous    | 0 | 1 |
| SETDB2-PHF11    | chr13 | 50100564/T//C      | nonsynonymous | 0 | 1 |
| BIVM-ERCC5      | chr13 | 103524733/T//C     | nonsynonymous | 0 | 1 |
| CGNL1           | chr15 | 57731320/C//T      | nonsynonymous | 0 | 1 |
| FASN            | chr17 | 80046431/C//T      | nonsynonymous | 0 | 1 |
| PTPN2           | chr18 | 12794322/G//A      | synonymous    | 0 | 1 |
| RBBP8           | chr18 | 20573441/G//C      | nonsynonymous | 0 | 1 |
| PALM            | chr19 | 746316/C//T        | synonymous    | 0 | 1 |
| PCSK4           | chr19 | 1481622/C//G       | synonymous    | 0 | 1 |
| IL27RA          | chr19 | 14157283/G//A      | nonsynonymous | 0 | 1 |
| RYR1            | chr19 | 38949964/C//T      | synonymous    | 0 | 1 |
| ZNF614          | chr19 | 52519603/T//C      | nonsynonymous | 0 | 1 |
| USP25           | chr21 | 17197278/C//G      | synonymous    | 0 | 1 |
| SGSM1           | chr22 | 25289403/C//T      | synonymous    | 0 | 1 |
| LMF2            | chr22 | 50943390/G//A      | synonymous    | 0 | 1 |
| PCDH11X         | chrX  | 91132676/C//A      | nonsynonymous | 0 | 1 |
| SPANXN4         | chrX  | 142122018/G//T     | nonsynonymous | 0 | 1 |
| C1orf228        | chr1  | 45190220/G//A      | synonymous    | 0 | 1 |
| CYP4A22         | chr1  | 47603205/C//T      | synonymous    | 0 | 1 |
| GUK1            | chr1  | 228336550/G//T     | synonymous    | 0 | 1 |
| GRHL1           | chr2  | 10136459/G//A      | nonsynonymous | 0 | 1 |
| ATAD2B          | chr2  | 24098743/C//T      | synonymous    | 0 | 1 |
| XIRP2           | chr2  | 168105216/C//T     | synonymous    | 0 | 1 |
| XIRP2           | chr2  | 168115015/A//C     | synonymous    | 0 | 1 |
| TTN             | chr2  | 179566951/C//T     | nonsynonymous | 0 | 1 |
| CERKL           | chr2  | 182413408/T//C     | nonsynonymous | 0 | 1 |
| GLB1            | chr3  | 33055712/G//A      | synonymous    | 0 | 1 |
| APC             | chr5  | 112174446/CCAAA//C | nonsynonymous | 0 | 1 |
| DSP             | chr6  | 7583247/G//A       | nonsynonymous | 0 | 1 |
| ZNF318          | chr6  | 43310552/T//TG     | nonsynonymous | 0 | 1 |
| POM121L12       | chr7  | 53103674/G//T      | nonsynonymous | 0 | 1 |
| CADPS2          | chr7  | 122303365/G//T     | nonsynonymous | 0 | 1 |
| TRPA1           | chr8  | 72981374/G//T      | nonsynonymous | 0 | 1 |
| ZNF696          | chr8  | 144378384/C//T     | nonsynonymous | 0 | 1 |
| IFNA10          | chr9  | 21207032/A//G      | nonsynonymous | 0 | 1 |
| ADO             | chr10 | 64565322/G//C      | nonsynonymous | 0 | 1 |
| PTPMT1          | chr11 | 47587472/G//C      | nonsynonymous | 0 | 1 |
| DLAT            | chr11 | 111904128/G//A     | nonsynonymous | 0 | 1 |
| ROBO3           | chr11 | 124746282/G//A     | nonsynonymous | 0 | 1 |
| RECQL           | chr12 | 21643151/G//A      | nonsynonymous | 0 | 1 |
| WSCD2           | chr12 | 108641993/G//A     | nonsynonymous | 0 | 1 |
| OR5AU1          | chr14 | 21623471/C//A      | nonsynonymous | 0 | 1 |
| PTPN21          | chr14 | 89016608/C//T      | nonsynonymous | 0 | 1 |
| SHISA9          | chr16 | 12996235/G//A      | nonsynonymous | 0 | 1 |
| RSPRY1          | chr16 | 57254765/T//G      | synonymous    | 0 | 1 |
| NOL3            | chr16 | 67208366/G//A      | synonymous    | 0 | 1 |
| TNFSF12-TNFSF13 | chr17 | 7463798/T//C       | synonymous    | 0 | 1 |
| TP53            | chr17 | 7579389/G//A       | nonsynonymous | 0 | 1 |
| AANAT           | chr17 | 74465975/G//A      | nonsynonymous | 0 | 1 |
| TMEM200C        | chr18 | 5890968/C//A       | nonsynonymous | 0 | 1 |
| ZNF626          | chr19 | 20807139/G//T      | nonsynonymous | 0 | 1 |
| VSTM2B          | chr19 | 30019369/C//T      | synonymous    | 0 | 1 |
| CDH26           | chr20 | 58560105/C//T      | nonsynonymous | 0 | 1 |
| INPP5J          | chr22 | 31518964/G//T      | synonymous    | 0 | 1 |
| MASP2           | chr1  | 11087593/A//T      | synonymous    | 1 | 0 |
| AGTRAP          | chr1  | 11807558/G//C      | nonsynonymous | 1 | 0 |
| SLC2A1          | chr1  | 43394892/T//C      | nonsynonymous | 1 | 0 |

|             |       |                   |               |   |   |
|-------------|-------|-------------------|---------------|---|---|
| DDX59       | chr1  | 200613463/T//C    | synonymous    | 1 | 0 |
| PROX1       | chr1  | 214170046/T//C    | synonymous    | 1 | 0 |
| WDR12       | chr2  | 203759343/T//C    | nonsynonymous | 1 | 0 |
| ATP2B2      | chr3  | 10387792/G//A     | nonsynonymous | 1 | 0 |
| ZBTB20      | chr3  | 114058231/GAGA//G | nonsynonymous | 1 | 0 |
| FAM169A     | chr5  | 74077730/T//A     | nonsynonymous | 1 | 0 |
| CHD1        | chr5  | 98234406/T//C     | nonsynonymous | 1 | 0 |
| KIAA1549    | chr7  | 138601515/C//T    | nonsynonymous | 1 | 0 |
| C8orf86     | chr8  | 38385932/T//C     | nonsynonymous | 1 | 0 |
| PLCE1       | chr10 | 96058431/G//A     | synonymous    | 1 | 0 |
| TAF6L       | chr11 | 62554777/C//T     | synonymous    | 1 | 0 |
| MEN1        | chr11 | 64575424/C//T     | nonsynonymous | 1 | 0 |
| SLC13A2     | chr17 | 26817530/C//T     | nonsynonymous | 1 | 0 |
| LINGO3      | chr19 | 2291614/G//A      | synonymous    | 1 | 0 |
| ZNF91       | chr19 | 23543472/A//T     | nonsynonymous | 1 | 0 |
| AKT2        | chr19 | 40748451/C//A     | nonsynonymous | 1 | 0 |
| OPRL1       | chr20 | 62724092/G//A     | nonsynonymous | 1 | 0 |
| CDK11B      | chr1  | 1650787/T//C      | nonsynonymous | 0 | 1 |
| CDK11B      | chr1  | 1650797/A//G      | nonsynonymous | 0 | 1 |
| CDK11B      | chr1  | 1650801/T//C      | synonymous    | 0 | 1 |
| CDK11B      | chr1  | 1650832/A//G      | nonsynonymous | 0 | 1 |
| GABRD       | chr1  | 1957086/G//A      | nonsynonymous | 0 | 1 |
| HSPG2       | chr1  | 22207275/A//G     | synonymous    | 0 | 1 |
| MR1         | chr1  | 181019231/G//A    | nonsynonymous | 0 | 1 |
| PPP1R12B    | chr1  | 202396250/G//C    | nonsynonymous | 0 | 1 |
| KCNH1       | chr1  | 211093204/G//A    | nonsynonymous | 0 | 1 |
| ADAM17      | chr2  | 9676940/A//G      | nonsynonymous | 0 | 1 |
| SRBD1       | chr2  | 45645631/G//A     | nonsynonymous | 0 | 1 |
| ARHGAP25    | chr2  | 69002420/G//A     | synonymous    | 0 | 1 |
| CD207       | chr2  | 71060088/C//A     | nonsynonymous | 0 | 1 |
| NEB         | chr2  | 152402887/A//G    | nonsynonymous | 0 | 1 |
| TBR1        | chr2  | 162280599/G//A    | nonsynonymous | 0 | 1 |
| ABCA12      | chr2  | 215809744/C//T    | nonsynonymous | 0 | 1 |
| MREG        | chr2  | 216809713/A//G    | nonsynonymous | 0 | 1 |
| DNPEP       | chr2  | 220251089/G//A    | synonymous    | 0 | 1 |
| HHLA2       | chr3  | 108095384/G//A    | nonsynonymous | 0 | 1 |
| TACR3       | chr4  | 104640637/C//T    | nonsynonymous | 0 | 1 |
| NIPBL       | chr5  | 37048718/A//G     | nonsynonymous | 0 | 1 |
| HTR1A       | chr5  | 63257087/C//T     | nonsynonymous | 0 | 1 |
| SERINC5     | chr5  | 79441926/T//C     | nonsynonymous | 0 | 1 |
| PCDHA7      | chr5  | 140215525/G//A    | synonymous    | 0 | 1 |
| PCDHA8      | chr5  | 140222472/G//A    | synonymous    | 0 | 1 |
| PCDHA10     | chr5  | 140237454/G//A    | synonymous    | 0 | 1 |
| PCDHB4      | chr5  | 140503064/C//T    | nonsynonymous | 0 | 1 |
| CCT6A       | chr7  | 56126095/A//G     | nonsynonymous | 0 | 1 |
| AKAP9       | chr7  | 91682104/G//A     | nonsynonymous | 0 | 1 |
| MUC17       | chr7  | 100680204/A//G    | nonsynonymous | 0 | 1 |
| PODXL       | chr7  | 131194344/G//A    | nonsynonymous | 0 | 1 |
| ZDHHC2      | chr8  | 17072741/T//A     | synonymous    | 0 | 1 |
| ASH2L       | chr8  | 37986409/T//C     | synonymous    | 0 | 1 |
| TRPM3       | chr9  | 73152199/G//A     | nonsynonymous | 0 | 1 |
| KIF27       | chr9  | 86518324/A//G     | nonsynonymous | 0 | 1 |
| PALM2-AKAP2 | chr9  | 112898561/G//T    | nonsynonymous | 0 | 1 |
| ADAMTSL2    | chr9  | 136433426/C//T    | nonsynonymous | 0 | 1 |
| ABCA2       | chr9  | 139902892/G//C    | synonymous    | 0 | 1 |
| CELF2       | chr10 | 11370923/A//G     | synonymous    | 0 | 1 |
| RIC8A       | chr11 | 211210/A//G       | nonsynonymous | 0 | 1 |
| RAD9A       | chr11 | 67160977/C//T     | nonsynonymous | 0 | 1 |
| CEP126      | chr11 | 101832479/G//T    | nonsynonymous | 0 | 1 |
| NRIP2       | chr12 | 2936359/G//A      | synonymous    | 0 | 1 |
| SOX5        | chr12 | 23699322/C//A     | nonsynonymous | 0 | 1 |
| LRRK2       | chr12 | 40681230/A//C     | nonsynonymous | 0 | 1 |
| GPR135      | chr14 | 59930727/G//A     | synonymous    | 0 | 1 |
| CEP170B     | chr14 | 105334833/C//T    | nonsynonymous | 0 | 1 |
| LTK         | chr15 | 41800415/G//C     | synonymous    | 0 | 1 |
| VPS39       | chr15 | 42452920/T//C     | synonymous    | 0 | 1 |
| BLM         | chr15 | 91347455/C//T     | nonsynonymous | 0 | 1 |
| PRR25       | chr16 | 857634/A//G       | nonsynonymous | 0 | 1 |
| ZNF598      | chr16 | 2048283/G//C      | nonsynonymous | 0 | 1 |
| PRSS21      | chr16 | 2868816/G//T      | synonymous    | 0 | 1 |

|           |       |                   |               |   |   |
|-----------|-------|-------------------|---------------|---|---|
| TP53      | chr17 | 7577520/A//G      | nonsynonymous | 0 | 1 |
| EFTUD2    | chr17 | 42942384/C//T     | nonsynonymous | 0 | 1 |
| SGCA      | chr17 | 48245074/G//A     | nonsynonymous | 0 | 1 |
| TSPOAP1   | chr17 | 56397923/C//T     | nonsynonymous | 0 | 1 |
| CDH2      | chr18 | 25532084/G//C     | synonymous    | 0 | 1 |
| DCC       | chr18 | 50976983/G//T     | nonsynonymous | 0 | 1 |
| ADNP2     | chr18 | 77894047/A//G     | nonsynonymous | 0 | 1 |
| ZNF585B   | chr19 | 37677297/G//T     | nonsynonymous | 0 | 1 |
| CENPB     | chr20 | 3766584/C//T      | nonsynonymous | 0 | 1 |
| PAK5      | chr20 | 9561521/C//T      | synonymous    | 0 | 1 |
| TGM2      | chr20 | 36767960/G//T     | nonsynonymous | 0 | 1 |
| KRTAP27-1 | chr21 | 31709459/C//A     | synonymous    | 0 | 1 |
| GAL3ST1   | chr22 | 30951763/C//T     | nonsynonymous | 0 | 1 |
| PRAMEF12  | chr1  | 12835154/C//G     | nonsynonymous | 0 | 1 |
| FMO4      | chr1  | 171292308/C//A    | nonsynonymous | 0 | 1 |
| DENND1B   | chr1  | 197611844/G//A    | synonymous    | 0 | 1 |
| SOX13     | chr1  | 204092268/C//G    | nonsynonymous | 0 | 1 |
| DNAH14    | chr1  | 225569113/G//T    | nonsynonymous | 0 | 1 |
| THADA     | chr2  | 43755127/C//A     | nonsynonymous | 0 | 1 |
| GPR45     | chr2  | 105858719/T//C    | nonsynonymous | 0 | 1 |
| TTN       | chr2  | 179412786/C//A    | nonsynonymous | 0 | 1 |
| TTN       | chr2  | 179634967/C//A    | nonsynonymous | 0 | 1 |
| NAA50     | chr3  | 113440545/A//G    | synonymous    | 0 | 1 |
| CHRD      | chr3  | 184099066/GCAA//G | nonsynonymous | 0 | 1 |
| IQCG      | chr3  | 197672522/C//T    | synonymous    | 0 | 1 |
| PPARGC1A  | chr4  | 23826133/T//G     | nonsynonymous | 0 | 1 |
| KIAA1211  | chr4  | 57181047/G//A     | nonsynonymous | 0 | 1 |
| TBC1D9    | chr4  | 141600863/A//T    | synonymous    | 0 | 1 |
| DCHS2     | chr4  | 155219563/G//C    | nonsynonymous | 0 | 1 |
| PCDHA8    | chr5  | 140221579/A//G    | nonsynonymous | 0 | 1 |
| EYS       | chr6  | 66205088/T//G     | nonsynonymous | 0 | 1 |
| COL12A1   | chr6  | 75801249/A//C     | synonymous    | 0 | 1 |
| COQ3      | chr6  | 99825258/T//G     | synonymous    | 0 | 1 |
| TBPL1     | chr6  | 134301402/A//C    | synonymous    | 0 | 1 |
| PDE7B     | chr6  | 136268617/T//C    | synonymous    | 0 | 1 |
| MYCT1     | chr6  | 153043287/A//T    | nonsynonymous | 0 | 1 |
| DDC       | chr7  | 50544318/T//G     | synonymous    | 0 | 1 |
| MAGI2     | chr7  | 77762200/T//G     | synonymous    | 0 | 1 |
| MUC17     | chr7  | 100685940/C//A    | nonsynonymous | 0 | 1 |
| WNT2      | chr7  | 116918022/T//G    | synonymous    | 0 | 1 |
| WEE2      | chr7  | 141429417/C//G    | nonsynonymous | 0 | 1 |
| ZNF703    | chr8  | 37554909/G//A     | nonsynonymous | 0 | 1 |
| ZNF703    | chr8  | 37555631/T//C     | synonymous    | 0 | 1 |
| SYBU      | chr8  | 110631127/C//A    | nonsynonymous | 0 | 1 |
| UBAP2     | chr9  | 33960876/C//T     | nonsynonymous | 0 | 1 |
| GDA       | chr9  | 74817499/G//A     | nonsynonymous | 0 | 1 |
| AGTPBP1   | chr9  | 88247786/A//C     | nonsynonymous | 0 | 1 |
| OR1J2     | chr9  | 125273400/T//G    | nonsynonymous | 0 | 1 |
| GOLGA2    | chr9  | 131020426/G//T    | nonsynonymous | 0 | 1 |
| PPP1R26   | chr9  | 138377413/G//T    | nonsynonymous | 0 | 1 |
| CDH23     | chr10 | 73574717/G//C     | nonsynonymous | 0 | 1 |
| KCNQ1     | chr11 | 2797192/A//C      | nonsynonymous | 0 | 1 |
|           | chr11 | 84996265/T//C     | synonymous    | 0 | 1 |
| SLC2A3    | chr12 | 8078549/G//A      | synonymous    | 0 | 1 |
| KMT2D     | chr12 | 49418658/C//A     | nonsynonymous | 0 | 1 |
| KMT2D     | chr12 | 49444157/C//T     | nonsynonymous | 0 | 1 |
| CIT       | chr12 | 120139444/A//C    | nonsynonymous | 0 | 1 |
| RAB35     | chr12 | 120535006/G//C    | synonymous    | 0 | 1 |
| EP400     | chr12 | 132512807/A//C    | synonymous    | 0 | 1 |
| ZNF268    | chr12 | 133779791/A//G    | nonsynonymous | 0 | 1 |
| NYNRIN    | chr14 | 24879039/C//T     | nonsynonymous | 0 | 1 |
| INSM2     | chr14 | 36004223/C//T     | synonymous    | 0 | 1 |
| SYNE2     | chr14 | 64421439/A//G     | nonsynonymous | 0 | 1 |
| CLPX      | chr15 | 65477465/G//GC    | nonsynonymous | 0 | 1 |
| PKD1      | chr16 | 2161340/C//T      | synonymous    | 0 | 1 |
| CREBBP    | chr16 | 3807810/C//T      | synonymous    | 0 | 1 |
| NF1       | chr17 | 29546029/A//T     | nonsynonymous | 0 | 1 |
| SLC4A1    | chr17 | 42333152/A//C     | synonymous    | 0 | 1 |
| DAZAP1    | chr19 | 1432644/A//G      | nonsynonymous | 0 | 1 |
| ZC3H4     | chr19 | 47584802/G//A     | synonymous    | 0 | 1 |

|          |       |                  |               |   |   |
|----------|-------|------------------|---------------|---|---|
| RPL18    | chr19 | 49118612/G//C    | synonymous    | 0 | 1 |
| TMEM86B  | chr19 | 55738697/A//G    | nonsynonymous | 0 | 1 |
| PRKX     | chrX  | 3631276/C//T     | nonsynonymous | 0 | 1 |
| HUWE1    | chrX  | 53569489/G//C    | nonsynonymous | 0 | 1 |
| RGAG1    | chrX  | 109694237/C//A   | nonsynonymous | 0 | 1 |
| TRPC5    | chrX  | 111019549/G//C   | nonsynonymous | 0 | 1 |
| FAM131C  | chr1  | 16385178/G//A    | synonymous    | 1 | 0 |
| RWDD3    | chr1  | 95712119/A//G    | nonsynonymous | 1 | 0 |
| PIGC     | chr1  | 172411009/C//A   | nonsynonymous | 1 | 0 |
| OBSCN    | chr1  | 228520597/C//T   | nonsynonymous | 1 | 0 |
| NRXN1    | chr2  | 50779731/G//A    | nonsynonymous | 1 | 0 |
| LRP1B    | chr2  | 141294186/A//T   | nonsynonymous | 1 | 0 |
| KCNH8    | chr3  | 19389246/G//A    | synonymous    | 1 | 0 |
| USP4     | chr3  | 49323727/T//A    | nonsynonymous | 1 | 0 |
| CASR     | chr3  | 121975932/A//G   | nonsynonymous | 1 | 0 |
| GHSR     | chr3  | 172163134/G//A   | synonymous    | 1 | 0 |
| PIGX     | chr3  | 196443721/T//C   | synonymous    | 1 | 0 |
| TSPAN5   | chr4  | 99399908/G//A    | synonymous    | 1 | 0 |
| NDST3    | chr4  | 119176902/T//C   | synonymous    | 1 | 0 |
| APC      | chr5  | 112175696/C//T   | nonsynonymous | 1 | 0 |
| PCDHA1   | chr5  | 140167661/G//A   | nonsynonymous | 1 | 0 |
| PCDHB4   | chr5  | 140503423/G//A   | nonsynonymous | 1 | 0 |
| PHYKPL   | chr5  | 177658507/AAG//A | nonsynonymous | 1 | 0 |
| OR2J3    | chr6  | 29079940/G//A    | synonymous    | 1 | 0 |
| EVX1     | chr7  | 27285585/C//T    | synonymous    | 1 | 0 |
| EGFR     | chr7  | 55259515/T//G    | nonsynonymous | 1 | 0 |
| AKAP9    | chr7  | 91630518/G//A    | synonymous    | 1 | 0 |
| NCAPG2   | chr7  | 158449050/T//G   | nonsynonymous | 1 | 0 |
| CSMD3    | chr8  | 113349934/G//A   | nonsynonymous | 1 | 0 |
| SLC34A3  | chr9  | 140130574/G//A   | synonymous    | 1 | 0 |
| LIPJ     | chr10 | 90351154/G//A    | nonsynonymous | 1 | 0 |
| SLIT1    | chr10 | 98824565/A//G    | nonsynonymous | 1 | 0 |
| PPRC1    | chr10 | 103901141/G//C   | nonsynonymous | 1 | 0 |
| INSC     | chr11 | 15267536/C//A    | nonsynonymous | 1 | 0 |
| ABTB2    | chr11 | 34219090/T//C    | synonymous    | 1 | 0 |
| OR5M1    | chr11 | 56380231/A//C    | nonsynonymous | 1 | 0 |
| CTTN     | chr11 | 70267667/C//T    | synonymous    | 1 | 0 |
| AQP11    | chr11 | 77320390/C//T    | nonsynonymous | 1 | 0 |
| CEP164   | chr11 | 117209303/A//G   | nonsynonymous | 1 | 0 |
| SENP1    | chr12 | 48459426/G//A    | nonsynonymous | 1 | 0 |
| GPD1     | chr12 | 50501914/G//GT   | synonymous    | 1 | 0 |
| ZNF84    | chr12 | 133635381/C//T   | nonsynonymous | 1 | 0 |
| AKAP11   | chr13 | 42877556/T//A    | synonymous    | 1 | 0 |
| MYH7     | chr14 | 23895255/G//A    | nonsynonymous | 1 | 0 |
| XRCC3    | chr14 | 104177401/C//G   | synonymous    | 1 | 0 |
| ANPEP    | chr15 | 90349699/T//C    | nonsynonymous | 1 | 0 |
| RPL3L    | chr16 | 1995568/A//G     | nonsynonymous | 1 | 0 |
| RANBP10  | chr16 | 67765470/A//G    | nonsynonymous | 1 | 0 |
| PHLPP2   | chr16 | 71710482/G//A    | nonsynonymous | 1 | 0 |
| ARHGEF15 | chr17 | 8221739/G//A     | nonsynonymous | 1 | 0 |
| SAP30BP  | chr17 | 73702437/A//G    | nonsynonymous | 1 | 0 |
| UNK      | chr17 | 73812870/C//T    | synonymous    | 1 | 0 |
| ACAA2    | chr18 | 47310300/G//A    | nonsynonymous | 1 | 0 |
| AP3D1    | chr19 | 2117371/G//A     | synonymous    | 1 | 0 |
| MUC16    | chr19 | 9071760/G//T     | nonsynonymous | 1 | 0 |
| ERICH3   | chr1  | 75072397/T//G    | nonsynonymous | 0 | 1 |
| AMY2B    | chr1  | 104114231/T//A   | nonsynonymous | 0 | 1 |
| ITGA10   | chr1  | 145535814/C//T   | nonsynonymous | 0 | 1 |
| PRRX1    | chr1  | 170689027/C//T   | synonymous    | 0 | 1 |
| ASTN1    | chr1  | 176992581/C//T   | nonsynonymous | 0 | 1 |
| PTPRC    | chr1  | 198665871/C//T   | nonsynonymous | 0 | 1 |
| CHRM3    | chr1  | 240071166/T//G   | nonsynonymous | 0 | 1 |
| GREM2    | chr1  | 240656109/C//T   | synonymous    | 0 | 1 |
| TAF1B    | chr2  | 10074184/T//G    | synonymous    | 0 | 1 |
| GRHL1    | chr2  | 10091847/G//T    | synonymous    | 0 | 1 |
| THADA    | chr2  | 43804326/A//G    | nonsynonymous | 0 | 1 |
| FSHR     | chr2  | 49381425/G//A    | synonymous    | 0 | 1 |
| LRP1B    | chr2  | 141031998/A//C   | nonsynonymous | 0 | 1 |
| LRP2     | chr2  | 170063759/T//A   | synonymous    | 0 | 1 |
| TTN      | chr2  | 179641722/T//G   | nonsynonymous | 0 | 1 |

|          |       |                |               |   |   |
|----------|-------|----------------|---------------|---|---|
| ZNF804A  | chr2  | 185802205/A//C | nonsynonymous | 0 | 1 |
| HECW2    | chr2  | 197189764/G//A | synonymous    | 0 | 1 |
| PLCL1    | chr2  | 198949664/A//T | nonsynonymous | 0 | 1 |
| NUP210   | chr3  | 13372074/C//T  | synonymous    | 0 | 1 |
| MYRIP    | chr3  | 40223746/A//C  | nonsynonymous | 0 | 1 |
| FBXW12   | chr3  | 48436036/G//A  | nonsynonymous | 0 | 1 |
| RABL3    | chr3  | 120428642/A//G | nonsynonymous | 0 | 1 |
| TMEM212  | chr3  | 171561264/T//C | nonsynonymous | 0 | 1 |
| NLGN1    | chr3  | 173997382/A//C | nonsynonymous | 0 | 1 |
| ATP5I    | chr4  | 666231/A//G    | synonymous    | 0 | 1 |
| CCSER1   | chr4  | 91230116/G//A  | synonymous    | 0 | 1 |
| SLC6A18  | chr5  | 1246053/C//T   | nonsynonymous | 0 | 1 |
| OR2B6    | chr6  | 27925707/C//T  | nonsynonymous | 0 | 1 |
| LEMD2    | chr6  | 33746106/C//G  | nonsynonymous | 0 | 1 |
| CUL9     | chr6  | 43180922/C//T  | nonsynonymous | 0 | 1 |
| TIAM2    | chr6  | 155451528/T//C | nonsynonymous | 0 | 1 |
| THSD7A   | chr7  | 11446622/G//T  | nonsynonymous | 0 | 1 |
| ZCWPW1   | chr7  | 100017306/G//A | nonsynonymous | 0 | 1 |
| POT1     | chr7  | 124532400/T//G | nonsynonymous | 0 | 1 |
| CNTNAP2  | chr7  | 145813996/G//A | nonsynonymous | 0 | 1 |
| DCAF13   | chr8  | 104427572/T//C | synonymous    | 0 | 1 |
| PLEC     | chr8  | 145001444/C//T | synonymous    | 0 | 1 |
| GLDC     | chr9  | 6588660/C//T   | synonymous    | 0 | 1 |
| ITIH5    | chr10 | 7608303/A//C   | synonymous    | 0 | 1 |
| NRXN2    | chr11 | 64418887/C//T  | nonsynonymous | 0 | 1 |
| DSCAML1  | chr11 | 117389342/C//T | nonsynonymous | 0 | 1 |
| IQSEC3   | chr12 | 274617/G//A    | synonymous    | 0 | 1 |
| CLEC4D   | chr12 | 8667928/A//C   | synonymous    | 0 | 1 |
| SARNP    | chr12 | 56151228/T//A  | synonymous    | 0 | 1 |
| EID3     | chr12 | 104697876/G//A | nonsynonymous | 0 | 1 |
| ASCL4    | chr12 | 108169082/A//G | synonymous    | 0 | 1 |
| TUBA3C   | chr13 | 19751632/T//G  | nonsynonymous | 0 | 1 |
| RNF17    | chr13 | 25442748/C//A  | nonsynonymous | 0 | 1 |
| N4BP2L2  | chr13 | 33095556/G//A  | nonsynonymous | 0 | 1 |
| LPAR6    | chr13 | 48985827/A//G  | nonsynonymous | 0 | 1 |
| ABCC4    | chr13 | 95887046/T//A  | nonsynonymous | 0 | 1 |
| NALCN    | chr13 | 101747983/A//C | nonsynonymous | 0 | 1 |
| DCAF4    | chr14 | 73406514/G//A  | nonsynonymous | 0 | 1 |
| VIPAS39  | chr14 | 77901705/T//C  | nonsynonymous | 0 | 1 |
| SLIRP    | chr14 | 78183868/T//T  | nonsynonymous | 0 | 1 |
|          | chr15 | 49448118/A//G  | synonymous    | 0 | 1 |
| ACSBG1   | chr15 | 78474467/G//A  | synonymous    | 0 | 1 |
| KRTAP9-8 | chr17 | 39394755/C//A  | nonsynonymous | 0 | 1 |
| MLX      | chr17 | 40723583/A//G  | nonsynonymous | 0 | 1 |
| DCC      | chr18 | 50278731/A//C  | nonsynonymous | 0 | 1 |
| SALL3    | chr18 | 76754379/C//T  | synonymous    | 0 | 1 |
| APC2     | chr19 | 1460266/C//T   | nonsynonymous | 0 | 1 |
| ECSIT    | chr19 | 11624022/T//G  | nonsynonymous | 0 | 1 |
| ZNF823   | chr19 | 11833425/T//C  | synonymous    | 0 | 1 |
| PLEKHF1  | chr19 | 30165133/C//T  | synonymous    | 0 | 1 |
|          | chr19 | 40903966/G//A  | synonymous    | 0 | 1 |
| AURKC    | chr19 | 57746736/A//C  | nonsynonymous | 0 | 1 |
| IL3RA    | chrX  | 1460714/C//T   | nonsynonymous | 0 | 1 |
| SMPX     | chrX  | 21755760/A//C  | nonsynonymous | 0 | 1 |
| SLC9A7   | chrX  | 46502788/C//T  | nonsynonymous | 0 | 1 |
| OGT      | chrX  | 70776893/C//T  | nonsynonymous | 0 | 1 |
| PCDH11X  | chrX  | 91090643/T//G  | nonsynonymous | 0 | 1 |
| HTR2C    | chrX  | 113965704/G//A | nonsynonymous | 0 | 1 |
| KLHL13   | chrX  | 117079487/G//A | synonymous    | 0 | 1 |
| TENM1    | chrX  | 123518690/G//A | nonsynonymous | 0 | 1 |
|          | chrX  | 131803197/G//A | synonymous    | 0 | 1 |
| MAGEC3   | chrX  | 140969216/T//G | synonymous    | 0 | 1 |
| FMR1     | chrX  | 147026492/C//A | nonsynonymous | 0 | 1 |
| SAMD11   | chr1  | 861391/G//T    | nonsynonymous | 1 | 0 |
| PRDM2    | chr1  | 14108450/A//T  | nonsynonymous | 1 | 0 |
| PADI6    | chr1  | 17727866/G//A  | nonsynonymous | 1 | 0 |
| SYNC     | chr1  | 33168243/G//A  | nonsynonymous | 1 | 0 |
| PODN     | chr1  | 53542934/C//T  | synonymous    | 1 | 0 |
| WDR78    | chr1  | 67306311/T//G  | nonsynonymous | 1 | 0 |
| ERICH3   | chr1  | 75078453/G//C  | synonymous    | 1 | 0 |

|              |      |                    |               |   |   |
|--------------|------|--------------------|---------------|---|---|
| LHX8         | chr1 | 75606699/T//C      | synonymous    | 1 | 0 |
| WDR63        | chr1 | 85570221/C//A      | synonymous    | 1 | 0 |
| CLCA4        | chr1 | 87031141/A//G      | synonymous    | 1 | 0 |
| CCDC18       | chr1 | 93671064/T//A      | synonymous    | 1 | 0 |
| OLFM3        | chr1 | 102290644/T//C     | nonsynonymous | 1 | 0 |
| RSDN1        | chr1 | 114310929/C//T     | nonsynonymous | 1 | 0 |
| SPAG17       | chr1 | 118512746/G//C     | synonymous    | 1 | 0 |
| PRKAB2       | chr1 | 146639484/C//T     | nonsynonymous | 1 | 0 |
| NIT1         | chr1 | 161089132/G//A     | nonsynonymous | 1 | 0 |
| LMX1A        | chr1 | 165322399/G//A     | synonymous    | 1 | 0 |
| IPO9         | chr1 | 201842030/A//C     | nonsynonymous | 1 | 0 |
| OBSCN        | chr1 | 228522880/C//T     | nonsynonymous | 1 | 0 |
| RYR2         | chr1 | 237604682/G//A     | nonsynonymous | 1 | 0 |
| RYR2         | chr1 | 237774191/AAGGT//A | nonsynonymous | 1 | 0 |
| OR13G1       | chr1 | 247836290/A//G     | synonymous    | 1 | 0 |
| ALK          | chr2 | 29462567/C//G      | nonsynonymous | 1 | 0 |
| CYP26B1      | chr2 | 72371240/G//A      | nonsynonymous | 1 | 0 |
| REG3G        | chr2 | 79253961/A//C      | synonymous    | 1 | 0 |
| IL36A        | chr2 | 113763452/G//T     | nonsynonymous | 1 | 0 |
| GLI2         | chr2 | 121747479/C//A     | nonsynonymous | 1 | 0 |
| GALNT5       | chr2 | 158157451/A//G     | synonymous    | 1 | 0 |
| TTN          | chr2 | 179474878/G//C     | nonsynonymous | 1 | 0 |
| DNAH7        | chr2 | 196825050/T//C     | nonsynonymous | 1 | 0 |
| RPL37A       | chr2 | 217363579/G//C     | synonymous    | 1 | 0 |
| OSBPL10      | chr3 | 32022448/G//A      | nonsynonymous | 1 | 0 |
| ZMYND10      | chr3 | 50380768/C//A      | synonymous    | 1 | 0 |
| ABHD14A-ACY1 | chr3 | 52018099/G//A      | nonsynonymous | 1 | 0 |
| PBRM1        | chr3 | 52597433/C//T      | nonsynonymous | 1 | 0 |
| IFT122       | chr3 | 129195521/G//A     | nonsynonymous | 1 | 0 |
| MCF2L2       | chr3 | 183035994/G//A     | synonymous    | 1 | 0 |
| TNK2         | chr3 | 195591056/C//T     | nonsynonymous | 1 | 0 |
| WHSC1        | chr4 | 1961285/C//G       | nonsynonymous | 1 | 0 |
| PROM1        | chr4 | 15982078/T//C      | nonsynonymous | 1 | 0 |
| LNX1         | chr4 | 54364904/G//C      | nonsynonymous | 1 | 0 |
| FRAS1        | chr4 | 79403122/C//T      | synonymous    | 1 | 0 |
| HERC6        | chr4 | 89357009/G//A      | nonsynonymous | 1 | 0 |
| LEF1         | chr4 | 109088840/G//C     | nonsynonymous | 1 | 0 |
| PLA2G12A     | chr4 | 110650919/A//C     | nonsynonymous | 1 | 0 |
| CDH12        | chr5 | 21854880/G//C      | synonymous    | 1 | 0 |
| SPEF2        | chr5 | 35727924/A//T      | nonsynonymous | 1 | 0 |
| C6           | chr5 | 41201726/G//T      | nonsynonymous | 1 | 0 |
| ADAMTS19     | chr5 | 129019824/T//C     | synonymous    | 1 | 0 |
| DDX46        | chr5 | 134124246/C//CG    | nonsynonymous | 1 | 0 |
| ECSCR        | chr5 | 138837724/C//G     | nonsynonymous | 1 | 0 |
| PCDHA8       | chr5 | 140223265/G//A     | nonsynonymous | 1 | 0 |
| PCDHA13      | chr5 | 140261925/G//A     | nonsynonymous | 1 | 0 |
| PCDHB11      | chr5 | 140581500/G//C     | nonsynonymous | 1 | 0 |
| FOXI1        | chr5 | 169533147/C//T     | synonymous    | 1 | 0 |
| SLC26A8      | chr6 | 35945132/G//A      | synonymous    | 1 | 0 |
| IBTK         | chr6 | 82911146/C//T      | nonsynonymous | 1 | 0 |
| LAMA2        | chr6 | 129419363/C//T     | nonsynonymous | 1 | 0 |
| MOXD1        | chr6 | 132722526/G//T     | nonsynonymous | 1 | 0 |
| TNRC18       | chr7 | 5428772/C//A       | nonsynonymous | 1 | 0 |
| THSD7A       | chr7 | 11521407/C//T      | synonymous    | 1 | 0 |
| AMPH         | chr7 | 38505847/G//T      | synonymous    | 1 | 0 |
| VPS41        | chr7 | 38812198/G//A      | nonsynonymous | 1 | 0 |
| SPDYE5       | chr7 | 75130995/G//A      | synonymous    | 1 | 0 |
| AKAP9        | chr7 | 91709358/A//C      | nonsynonymous | 1 | 0 |
| MCM7         | chr7 | 99694983/C//T      | nonsynonymous | 1 | 0 |
| ACTL6B       | chr7 | 100246358/G//T     | nonsynonymous | 1 | 0 |
| SSPO         | chr7 | 149486000/G//T     | nonsynonymous | 1 | 0 |
| HR           | chr8 | 21978433/T//C      | synonymous    | 1 | 0 |
| ADAMDEC1     | chr8 | 24256928/C//T      | nonsynonymous | 1 | 0 |
| UBXN8        | chr8 | 30618400/T//C      | synonymous    | 1 | 0 |
| KCNB2        | chr8 | 73480417/G//A      | nonsynonymous | 1 | 0 |
| CALB1        | chr8 | 91081456/C//T      | nonsynonymous | 1 | 0 |
| ADCY8        | chr8 | 132002695/C//T     | nonsynonymous | 1 | 0 |
| RUSC2        | chr9 | 35560740/C//T      | nonsynonymous | 1 | 0 |
| PRUNE2       | chr9 | 79320090/C//A      | nonsynonymous | 1 | 0 |
| ZBTB6        | chr9 | 125674140/C//A     | nonsynonymous | 1 | 0 |



|          |       |                        |               |   |   |
|----------|-------|------------------------|---------------|---|---|
| NDOR1    | chr9  | 140108752/G//A         | synonymous    | 1 | 0 |
| SFRP5    | chr10 | 99531274/A//T          | nonsynonymous | 1 | 0 |
| GSTO1    | chr10 | 106019550/T//G         | nonsynonymous | 1 | 0 |
| FGFR2    | chr10 | 123239462/G//A         | nonsynonymous | 1 | 0 |
| CD81     | chr11 | 2417941/C//A           | synonymous    | 1 | 0 |
| ARFIP2   | chr11 | 6498409/C//T           | synonymous    | 1 | 0 |
| SSRP1    | chr11 | 57099257/G//A          | nonsynonymous | 1 | 0 |
| RASGRP2  | chr11 | 64507104/G//C          | synonymous    | 1 | 0 |
| BSX      | chr11 | 122849968/C//A         | nonsynonymous | 1 | 0 |
| SIAE     | chr11 | 124543589/G//A         | nonsynonymous | 1 | 0 |
| TMTC1    | chr12 | 29904803/C//T          | nonsynonymous | 1 | 0 |
| PRPF40B  | chr12 | 50024333/T//A          | synonymous    | 1 | 0 |
| SOAT2    | chr12 | 53509290/TGTGGGCCAG//T | nonsynonymous | 1 | 0 |
| AAAS     | chr12 | 53701719/A//C          | synonymous    | 1 | 0 |
| ITGA7    | chr12 | 56088586/T//A          | synonymous    | 1 | 0 |
| AVPR1A   | chr12 | 63544123/C//T          | nonsynonymous | 1 | 0 |
| FLT3     | chr13 | 28626732/G//A          | synonymous    | 1 | 0 |
| PCDH17   | chr13 | 58209215/G//A          | synonymous    | 1 | 0 |
| TNFSF13B | chr13 | 108959197/G//C         | nonsynonymous | 1 | 0 |
| MYH7     | chr14 | 23894973/C//A          | nonsynonymous | 1 | 0 |
| AP1G2    | chr14 | 24036440/G//A          | synonymous    | 1 | 0 |
| TSSK4    | chr14 | 24676367/G//T          | nonsynonymous | 1 | 0 |
| SIX4     | chr14 | 61186701/G//C          | synonymous    | 1 | 0 |
| TRPM1    | chr15 | 31360147/C//A          | nonsynonymous | 1 | 0 |
| MYO5C    | chr15 | 52497148/C//T          | synonymous    | 1 | 0 |
| TSC2     | chr16 | 2106224/C//T           | synonymous    | 1 | 0 |
| TXNDC11  | chr16 | 11773348/C//T          | synonymous    | 1 | 0 |
| POLR3E   | chr16 | 22320356/T//G          | nonsynonymous | 1 | 0 |
| RPGRIP1L | chr16 | 53686660/C//T          | nonsynonymous | 1 | 0 |
| DHODH    | chr16 | 72048400/G//C          | nonsynonymous | 1 | 0 |
| CCL7     | chr17 | 32598875/A//G          | synonymous    | 1 | 0 |
|          | chr17 | 40726081/G//C          | synonymous    | 1 | 0 |
| HSF5     | chr17 | 56540230/A//G          | synonymous    | 1 | 0 |
| HSF5     | chr17 | 56557264/G//C          | nonsynonymous | 1 | 0 |
| SCN4A    | chr17 | 62043565/C//T          | nonsynonymous | 1 | 0 |
| TMC8     | chr17 | 76137064/G//A          | synonymous    | 1 | 0 |
| DNAH17   | chr17 | 76488710/G//A          | synonymous    | 1 | 0 |
| EMILIN2  | chr18 | 2892078/G//C           | nonsynonymous | 1 | 0 |
| KIAA1468 | chr18 | 59894675/C//G          | nonsynonymous | 1 | 0 |
| ZNF516   | chr18 | 74092160/C//T          | nonsynonymous | 1 | 0 |
| ZNF585A  | chr19 | 37644037/G//C          | nonsynonymous | 1 | 0 |
| FCGBP    | chr19 | 40412151/G//A          | synonymous    | 1 | 0 |
| PLA2G4C  | chr19 | 48565308/G//A          | nonsynonymous | 1 | 0 |
| SMIM17   | chr19 | 57157174/G//T          | nonsynonymous | 1 | 0 |
| DUSP15   | chr20 | 30457385/A//T          | nonsynonymous | 1 | 0 |
| CHD6     | chr20 | 40044062/C//G          | nonsynonymous | 1 | 0 |
| UQCR10   | chr22 | 30165790/G//C          | synonymous    | 1 | 0 |
| RNF215   | chr22 | 30775472/G//A          | synonymous    | 1 | 0 |
| DRG1     | chr22 | 31830011/C//T          | synonymous    | 1 | 0 |
| ELFN2    | chr22 | 37770945/G//A          | synonymous    | 1 | 0 |
| MICALL1  | chr22 | 38317999/C//T          | nonsynonymous | 1 | 0 |
| MAPK8IP2 | chr22 | 51042070/A//C          | nonsynonymous | 1 | 0 |
| SYTL5    | chrX  | 37931380/ATGT//A       | nonsynonymous | 1 | 0 |
| ATRX     | chrX  | 76777815/T//C          | nonsynonymous | 1 | 0 |
| TMEM257  | chrX  | 144909390/C//A         | nonsynonymous | 1 | 0 |
| TGIF2LY  | chrY  | 3447882/C//A           | synonymous    | 1 | 0 |
| CTRC     | chr1  | 15768948/C//T          | nonsynonymous | 0 | 1 |
| PADI3    | chr1  | 17609652/C//T          | synonymous    | 0 | 1 |
| GRIK3    | chr1  | 37307343/G//A          | synonymous    | 0 | 1 |
| SZT2     | chr1  | 43893034/T//A          | synonymous    | 0 | 1 |
| ACOT11   | chr1  | 55073682/C//T          | nonsynonymous | 0 | 1 |
| ATP1A4   | chr1  | 160124948/C//T         | synonymous    | 0 | 1 |
| FMO3     | chr1  | 171086555/A//C         | nonsynonymous | 0 | 1 |
| PAPPA2   | chr1  | 176526075/C//T         | nonsynonymous | 0 | 1 |
| MYBPH    | chr1  | 203137795/C//T         | nonsynonymous | 0 | 1 |
| RBBP5    | chr1  | 205070777/T//C         | nonsynonymous | 0 | 1 |
| EXO1     | chr1  | 242035540/G//T         | nonsynonymous | 0 | 1 |
| KIF26B   | chr1  | 245852001/G//A         | nonsynonymous | 0 | 1 |
| UGGT1    | chr2  | 128945048/C//G         | nonsynonymous | 0 | 1 |
| ITPR1    | chr3  | 4735251/G//A           | synonymous    | 0 | 1 |

|            |       |                |               |   |   |
|------------|-------|----------------|---------------|---|---|
| DYNC1LI1   | chr3  | 32582626/G//A  | nonsynonymous | 0 | 1 |
| CCDC36     | chr3  | 49294687/T//C  | nonsynonymous | 0 | 1 |
| SEMA3F     | chr3  | 50212616/C//T  | nonsynonymous | 0 | 1 |
| ABHD14A    | chr3  | 52014422/G//A  | synonymous    | 0 | 1 |
| OR5AC2     | chr3  | 97806608/G//A  | nonsynonymous | 0 | 1 |
| DNAJB8     | chr3  | 128181993/G//A | synonymous    | 0 | 1 |
| EPHB1      | chr3  | 134851646/G//A | nonsynonymous | 0 | 1 |
| EIF4G1     | chr3  | 184035283/C//T | nonsynonymous | 0 | 1 |
| TRMT44     | chr4  | 8469692/G//A   | nonsynonymous | 0 | 1 |
| CFI        | chr4  | 110670375/T//C | nonsynonymous | 0 | 1 |
| FRG1       | chr4  | 190878567/G//C | nonsynonymous | 0 | 1 |
| FRG1       | chr4  | 190878583/T//C | nonsynonymous | 0 | 1 |
| DNAH5      | chr5  | 13752300/A//G  | synonymous    | 0 | 1 |
| CDH18      | chr5  | 19838868/C//T  | synonymous    | 0 | 1 |
| EDIL3      | chr5  | 83476288/T//C  | nonsynonymous | 0 | 1 |
| APC        | chr5  | 112174559/C//T | nonsynonymous | 0 | 1 |
| PCDHGA1    | chr5  | 140711927/C//T | nonsynonymous | 0 | 1 |
| PCDHGB5    | chr5  | 140778270/G//A | synonymous    | 0 | 1 |
| FAT2       | chr5  | 150948328/G//A | synonymous    | 0 | 1 |
| FLT4       | chr5  | 180057648/C//T | nonsynonymous | 0 | 1 |
| TRIM41     | chr5  | 180651016/T//C | nonsynonymous | 0 | 1 |
| CAGE1      | chr6  | 7373663/T//G   | nonsynonymous | 0 | 1 |
| OR2B2      | chr6  | 27879093/G//A  | synonymous    | 0 | 1 |
| ZBED9      | chr6  | 28543508/C//T  | nonsynonymous | 0 | 1 |
| COL21A1    | chr6  | 56035494/C//T  | nonsynonymous | 0 | 1 |
| EYS        | chr6  | 65300131/G//A  | nonsynonymous | 0 | 1 |
| NMBR       | chr6  | 142399786/G//A | nonsynonymous | 0 | 1 |
| IFT22      | chr7  | 100959700/C//T | synonymous    | 0 | 1 |
| CSGALNACT1 | chr8  | 19362817/G//A  | nonsynonymous | 0 | 1 |
| PLEC       | chr8  | 144998131/C//T | nonsynonymous | 0 | 1 |
| SARDH      | chr9  | 136582462/G//A | nonsynonymous | 0 | 1 |
| OLFM1      | chr9  | 137990330/C//T | nonsynonymous | 0 | 1 |
| DCHS1      | chr11 | 6661913/G//A   | nonsynonymous | 0 | 1 |
| ANO5       | chr11 | 22284516/G//C  | nonsynonymous | 0 | 1 |
| F2         | chr11 | 46747438/C//A  | nonsynonymous | 0 | 1 |
| MS4A6A     | chr11 | 59942940/C//T  | nonsynonymous | 0 | 1 |
| KDM5A      | chr12 | 431588/T//C    | synonymous    | 0 | 1 |
| GNB3       | chr12 | 6952177/C//T   | nonsynonymous | 0 | 1 |
| PHC1       | chr12 | 9092026/G//A   | nonsynonymous | 0 | 1 |
| KMT2D      | chr12 | 49435967/C//T  | nonsynonymous | 0 | 1 |
| FZD10      | chr12 | 130647800/G//A | nonsynonymous | 0 | 1 |
|            | chr13 | 109282131/C//T | synonymous    | 0 | 1 |
| FBXO33     | chr14 | 39870376/C//T  | synonymous    | 0 | 1 |
| TDRD9      | chr14 | 104422039/A//G | nonsynonymous | 0 | 1 |
| ATP10A     | chr15 | 25932891/G//A  | nonsynonymous | 0 | 1 |
| DISP2      | chr15 | 40656103/C//T  | nonsynonymous | 0 | 1 |
| SHC4       | chr15 | 49127051/C//T  | nonsynonymous | 0 | 1 |
| CYP11A1    | chr15 | 74640284/C//T  | nonsynonymous | 0 | 1 |
| RGS11      | chr16 | 321199/A//T    | nonsynonymous | 0 | 1 |
| ZNF263     | chr16 | 3339607/G//T   | synonymous    | 0 | 1 |
| TIGD7      | chr16 | 3350159/A//T   | nonsynonymous | 0 | 1 |
| NOD2       | chr16 | 50745613/G//A  | synonymous    | 0 | 1 |
| HYDIN      | chr16 | 70883691/C//A  | nonsynonymous | 0 | 1 |
| TP53       | chr17 | 7579310/A//C   | nonsynonymous | 0 | 1 |
| LRRC37B    | chr17 | 30376310/A//G  | nonsynonymous | 0 | 1 |
| KRT25      | chr17 | 38906799/C//T  | synonymous    | 0 | 1 |
| KRT23      | chr17 | 39092610/G//A  | synonymous    | 0 | 1 |
| NT5C3B     | chr17 | 39985135/G//A  | synonymous    | 0 | 1 |
| PRPSAP1    | chr17 | 74326675/T//G  | nonsynonymous | 0 | 1 |
| ADAMTS10   | chr19 | 8654233/C//T   | nonsynonymous | 0 | 1 |
| SLC44A2    | chr19 | 10747173/G//T  | nonsynonymous | 0 | 1 |
| ZNF69      | chr19 | 11998783/A//T  | synonymous    | 0 | 1 |
| ZNF536     | chr19 | 30935611/G//A  | nonsynonymous | 0 | 1 |
| CPT1C      | chr19 | 50208001/G//A  | nonsynonymous | 0 | 1 |
| NUP62      | chr19 | 50412073/G//A  | nonsynonymous | 0 | 1 |
| ZNF134     | chr19 | 58132017/A//G  | nonsynonymous | 0 | 1 |
| BFSP1      | chr20 | 17474941/C//T  | synonymous    | 0 | 1 |
| SLC19A1    | chr21 | 46951450/G//A  | nonsynonymous | 0 | 1 |
| MTFP1      | chr22 | 30823165/G//T  | nonsynonymous | 0 | 1 |
| INPP5J     | chr22 | 31522468/G//A  | nonsynonymous | 0 | 1 |

|          |      |                      |               |   |   |
|----------|------|----------------------|---------------|---|---|
| CYLC1    | chrX | 83128538/G//A        | synonymous    | 0 | 1 |
| DACH2    | chrX | 85906054/C//T        | nonsynonymous | 0 | 1 |
| SLC35E2  | chr1 | 1663913/G//C         | nonsynonymous | 0 | 1 |
| WRAP73   | chr1 | 3552499/TCTTCATAC//T | nonsynonymous | 0 | 1 |
| FAM131C  | chr1 | 16384916/C//T        | synonymous    | 0 | 1 |
| ARID1A   | chr1 | 27105519/A//AGG      | nonsynonymous | 0 | 1 |
| SLC9A1   | chr1 | 27428555/C//T        | synonymous    | 0 | 1 |
| EPHA10   | chr1 | 38188716/C//T        | nonsynonymous | 0 | 1 |
| MACF1    | chr1 | 39550062/C//T        | nonsynonymous | 0 | 1 |
| RLF      | chr1 | 40705248/A//G        | nonsynonymous | 0 | 1 |
| CDC14A   | chr1 | 100905504/A//G       | nonsynonymous | 0 | 1 |
| S1PR1    | chr1 | 101704808/T//G       | nonsynonymous | 0 | 1 |
| DDX20    | chr1 | 112308549/A//C       | synonymous    | 0 | 1 |
| SELP     | chr1 | 169586423/C//A       | nonsynonymous | 0 | 1 |
| FMO2     | chr1 | 171174569/T//C       | nonsynonymous | 0 | 1 |
| TPR      | chr1 | 186283112/A//G       | synonymous    | 0 | 1 |
| CFH      | chr1 | 196642222/C//G       | nonsynonymous | 0 | 1 |
| ZBTB41   | chr1 | 197169098/T//C       | nonsynonymous | 0 | 1 |
| EXOC8    | chr1 | 231473467/C//G       | nonsynonymous | 0 | 1 |
| OR2G2    | chr1 | 247752442/A//C       | nonsynonymous | 0 | 1 |
| APOB     | chr2 | 21233293/A//G        | synonymous    | 0 | 1 |
| EML4     | chr2 | 42396691/T//A        | synonymous    | 0 | 1 |
| EPCAM    | chr2 | 47612303/A//G        | nonsynonymous | 0 | 1 |
| ANKRD39  | chr2 | 97514129/G//T        | nonsynonymous | 0 | 1 |
| STAM2    | chr2 | 153004806/T//C       | nonsynonymous | 0 | 1 |
| PLA2R1   | chr2 | 160833203/G//A       | synonymous    | 0 | 1 |
| FAP      | chr2 | 163039918/A//G       | synonymous    | 0 | 1 |
| TTN      | chr2 | 179647006/C//A       | nonsynonymous | 0 | 1 |
| COL5A2   | chr2 | 189916071/C//A       | nonsynonymous | 0 | 1 |
| ANKRD44  | chr2 | 197946442/T//C       | nonsynonymous | 0 | 1 |
| DES      | chr2 | 220290383/A//T       | nonsynonymous | 0 | 1 |
| CTNNB1   | chr3 | 41266097/G//T        | nonsynonymous | 0 | 1 |
| COL7A1   | chr3 | 48618031/C//T        | nonsynonymous | 0 | 1 |
| CELSR3   | chr3 | 48688892/C//T        | nonsynonymous | 0 | 1 |
| QRICH1   | chr3 | 49095091/TG//T       | nonsynonymous | 0 | 1 |
| USP19    | chr3 | 49152418/C//T        | nonsynonymous | 0 | 1 |
| GLT8D1   | chr3 | 52729011/C//G        | nonsynonymous | 0 | 1 |
| TMEM39A  | chr3 | 119176890/T//C       | nonsynonymous | 0 | 1 |
|          | chr3 | 119198852/A//G       | synonymous    | 0 | 1 |
| HEG1     | chr3 | 124732119/T//C       | synonymous    | 0 | 1 |
| TXNRD3   | chr3 | 126329898/G//C       | nonsynonymous | 0 | 1 |
| SLC35G2  | chr3 | 136574275/T//A       | nonsynonymous | 0 | 1 |
| P3H2     | chr3 | 189692438/T//C       | nonsynonymous | 0 | 1 |
| SLC26A1  | chr4 | 983497/G//A          | synonymous    | 0 | 1 |
| AFAP1    | chr4 | 7802283/C//A         | nonsynonymous | 0 | 1 |
| LAP3     | chr4 | 17609065/C//T        | synonymous    | 0 | 1 |
| SLC34A2  | chr4 | 25676209/C//T        | synonymous    | 0 | 1 |
| GABRA2   | chr4 | 46252492/T//C        | nonsynonymous | 0 | 1 |
| GYPA     | chr4 | 145040861/A//G       | synonymous    | 0 | 1 |
| KLHL2    | chr4 | 166234493/A//G       | synonymous    | 0 | 1 |
| SH3RF1   | chr4 | 170051220/C//T       | nonsynonymous | 0 | 1 |
| CDKN2AIP | chr4 | 184368521/G//T       | nonsynonymous | 0 | 1 |
| TERT     | chr5 | 1279531/G//A         | nonsynonymous | 0 | 1 |
| SEMA5A   | chr5 | 9197323/C//T         | nonsynonymous | 0 | 1 |
| DNAH5    | chr5 | 13844994/A//G        | synonymous    | 0 | 1 |
| CDH9     | chr5 | 26881242/C//T        | synonymous    | 0 | 1 |
| CDH9     | chr5 | 26916007/T//A        | nonsynonymous | 0 | 1 |
| PDZD2    | chr5 | 32000286/A//G        | nonsynonymous | 0 | 1 |
| NIPBL    | chr5 | 36985664/A//T        | nonsynonymous | 0 | 1 |
| OSMR     | chr5 | 38876479/A//G        | synonymous    | 0 | 1 |
| MOCS2    | chr5 | 52405470/A//T        | synonymous    | 0 | 1 |
| MIER3    | chr5 | 56246485/A//C        | synonymous    | 0 | 1 |
| CRHBP    | chr5 | 76264653/C//G        | nonsynonymous | 0 | 1 |
| KIAA0825 | chr5 | 93800652/A//C        | nonsynonymous | 0 | 1 |
| SLCO6A1  | chr5 | 101726686/A//T       | nonsynonymous | 0 | 1 |
| PPIP5K2  | chr5 | 102515775/T//G       | synonymous    | 0 | 1 |
| PRRC1    | chr5 | 126866083/A//AT      | nonsynonymous | 0 | 1 |
| LEAP2    | chr5 | 132209447/A//C       | synonymous    | 0 | 1 |
| TRPC7    | chr5 | 135692447/T//C       | nonsynonymous | 0 | 1 |
| HBEGF    | chr5 | 139725660/G//A       | nonsynonymous | 0 | 1 |

|          |       |                           |               |   |   |
|----------|-------|---------------------------|---------------|---|---|
| SLC36A2  | chr5  | 150696625/C//A            | nonsynonymous | 0 | 1 |
| CCNJL    | chr5  | 159682670/C//G            | nonsynonymous | 0 | 1 |
| ZNF454   | chr5  | 178392535/T//C            | nonsynonymous | 0 | 1 |
| HNRNPH1  | chr5  | 179045228/G//A            | synonymous    | 0 | 1 |
| POM121L2 | chr6  | 27278478/C//A             | nonsynonymous | 0 | 1 |
| HLA-DRB1 | chr6  | 32548515/C//T             | synonymous    | 0 | 1 |
| PSMB8    | chr6  | 32811680/G//T             | nonsynonymous | 0 | 1 |
| CDKN1A   | chr6  | 36651879/A//G             | nonsynonymous | 0 | 1 |
| ASCC3    | chr6  | 101073128/C//A            | nonsynonymous | 0 | 1 |
| ARHGAP18 | chr6  | 129905179/C//A            | nonsynonymous | 0 | 1 |
| CARD11   | chr7  | 2987326/G//A              | nonsynonymous | 0 | 1 |
| PAPOLB   | chr7  | 4901465/G//GCACGTCCCCCACC | synonymous    | 0 | 1 |
| URGCP    | chr7  | 43918522/TGGCGTATCAGGGGT  | nonsynonymous | 0 | 1 |
| PCLO     | chr7  | 82784089/A//C             | nonsynonymous | 0 | 1 |
| MBLAC1   | chr7  | 99725815/A//T             | nonsynonymous | 0 | 1 |
| SH2B2    | chr7  | 101943811/G//A            | nonsynonymous | 0 | 1 |
| KCNH2    | chr7  | 150648732/G//T            | synonymous    | 0 | 1 |
| CLDN23   | chr8  | 8560387/T//G              | nonsynonymous | 0 | 1 |
| RP1L1    | chr8  | 10469901/G//T             | nonsynonymous | 0 | 1 |
| UNC5D    | chr8  | 35648059/A//G             | nonsynonymous | 0 | 1 |
| OSR2     | chr8  | 99961829/G//T             | nonsynonymous | 0 | 1 |
| FREM1    | chr9  | 14851595/G//A             | nonsynonymous | 0 | 1 |
| CDKN2A   | chr9  | 21971209/T//G             | nonsynonymous | 0 | 1 |
| IFNK     | chr9  | 27524842/G//C             | nonsynonymous | 0 | 1 |
| RECK     | chr9  | 36122893/C//T             | nonsynonymous | 0 | 1 |
| ALDOB    | chr9  | 104189834/T//A            | nonsynonymous | 0 | 1 |
| CHAT     | chr10 | 50833526/A//T             | nonsynonymous | 0 | 1 |
| KAT6B    | chr10 | 76737145/A//G             | nonsynonymous | 0 | 1 |
| NFKB2    | chr10 | 104161574/GCAGCTGGGC//G   | nonsynonymous | 0 | 1 |
| OR9G1    | chr11 | 56468052/A//G             | synonymous    | 0 | 1 |
| UCP2     | chr11 | 73688956/T//G             | nonsynonymous | 0 | 1 |
| C2CD2L   | chr11 | 118984801/T//A            | synonymous    | 0 | 1 |
| GRIN2B   | chr12 | 13761695/C//T             | nonsynonymous | 0 | 1 |
| ATF7IP   | chr12 | 14589061/G//A             | nonsynonymous | 0 | 1 |
| PLCZ1    | chr12 | 18837150/A//G             | nonsynonymous | 0 | 1 |
| ADAMTS20 | chr12 | 43847704/A//T             | synonymous    | 0 | 1 |
| KMT2D    | chr12 | 49435753/G//A             | nonsynonymous | 0 | 1 |
| COQ10A   | chr12 | 56663938/C//A             | nonsynonymous | 0 | 1 |
| OTOGL    | chr12 | 80714486/T//C             | synonymous    | 0 | 1 |
| CHST11   | chr12 | 105150981/C//T            | synonymous    | 0 | 1 |
| CCDC60   | chr12 | 119943079/C//A            | nonsynonymous | 0 | 1 |
| PARP4    | chr13 | 25033238/C//G             | nonsynonymous | 0 | 1 |
| FBXL3    | chr13 | 77581170/T//C             | synonymous    | 0 | 1 |
| NOVA1    | chr14 | 27064662/T//A             | nonsynonymous | 0 | 1 |
| SEC23A   | chr14 | 39530981/G//C             | nonsynonymous | 0 | 1 |
| EML5     | chr14 | 89083211/A//G             | synonymous    | 0 | 1 |
| CDC42BPB | chr14 | 103410716/G//A            | nonsynonymous | 0 | 1 |
| EIF5     | chr14 | 103807418/A//G            | synonymous    | 0 | 1 |
| DMXL2    | chr15 | 51830621/T//G             | synonymous    | 0 | 1 |
| TIPIN    | chr15 | 66633482/A//C             | synonymous    | 0 | 1 |
| IQGAP1   | chr15 | 91021124/A//G             | synonymous    | 0 | 1 |
| FURIN    | chr15 | 91422015/A//G             | nonsynonymous | 0 | 1 |
| ADAMTS17 | chr15 | 100516258/G//A            | nonsynonymous | 0 | 1 |
| TIGD7    | chr16 | 3349433/G//A              | synonymous    | 0 | 1 |
| USP7     | chr16 | 9004690/AAG//A            | synonymous    | 0 | 1 |
| GRIN2A   | chr16 | 10032093/G//T             | nonsynonymous | 0 | 1 |
| MYH11    | chr16 | 15853436/A//G             | synonymous    | 0 | 1 |
| BCKDK    | chr16 | 31123189/G//C             | nonsynonymous | 0 | 1 |
| PRSS36   | chr16 | 31161045/A//G             | synonymous    | 0 | 1 |
| C16orf58 | chr16 | 31505058/T//C             | nonsynonymous | 0 | 1 |
| ZNF469   | chr16 | 88498853/C//A             | nonsynonymous | 0 | 1 |
| RPH3AL   | chr17 | 171126/T//C               | nonsynonymous | 0 | 1 |
| NLRP1    | chr17 | 5436704/T//C              | nonsynonymous | 0 | 1 |
| C17orf74 | chr17 | 7330663/T//A              | nonsynonymous | 0 | 1 |
| MYH4     | chr17 | 10350384/C//T             | nonsynonymous | 0 | 1 |
| MYH4     | chr17 | 10357022/T//C             | nonsynonymous | 0 | 1 |
| MYH3     | chr17 | 10535021/C//T             | synonymous    | 0 | 1 |
| DNAH9    | chr17 | 11572723/C//T             | nonsynonymous | 0 | 1 |
| SPECC1   | chr17 | 20156825/C//T             | nonsynonymous | 0 | 1 |
| ASIC2    | chr17 | 32483621/G//T             | synonymous    | 0 | 1 |

|              |       |               |               |   |   |
|--------------|-------|---------------|---------------|---|---|
| CDC6         | chr17 | 38450313/G//C | synonymous    | 0 | 1 |
| P3H4         | chr17 | 39964258/T//A | nonsynonymous | 0 | 1 |
| VPS25        | chr17 | 40925500/A//T | nonsynonymous | 0 | 1 |
| PHOSPHO1     | chr17 | 47304096/G//A | synonymous    | 0 | 1 |
| NXP3         | chr17 | 47656797/G//A | synonymous    | 0 | 1 |
| ABCA5        | chr17 | 67243654/G//A | synonymous    | 0 | 1 |
| FBF1         | chr17 | 73919384/T//C | nonsynonymous | 0 | 1 |
| NAPG         | chr18 | 10526051/G//T | synonymous    | 0 | 1 |
| PIAS2        | chr18 | 44435378/C//A | nonsynonymous | 0 | 1 |
| ELAC1        | chr18 | 48510938/G//A | synonymous    | 0 | 1 |
| CNDP1        | chr18 | 72201888/C//G | synonymous    | 0 | 1 |
| JSRP1        | chr19 | 2252324/C//T  | synonymous    | 0 | 1 |
| MRPL54       | chr19 | 3762705/A//T  | nonsynonymous | 0 | 1 |
| DPP9         | chr19 | 4685768/T//A  | nonsynonymous | 0 | 1 |
| MUC16        | chr19 | 9089611/T//C  | nonsynonymous | 0 | 1 |
| OR10H1       | chr19 | 15918690/C//T | nonsynonymous | 0 | 1 |
| OR10H4       | chr19 | 16060441/C//T | synonymous    | 0 | 1 |
| GDF15        | chr19 | 18499281/C//T | synonymous    | 0 | 1 |
| CEBPA        | chr19 | 33792218/C//A | synonymous    | 0 | 1 |
| ZNF529       | chr19 | 37038705/T//G | nonsynonymous | 0 | 1 |
| BCL3         | chr19 | 45260921/T//C | nonsynonymous | 0 | 1 |
| RSPH6A       | chr19 | 46318361/T//C | nonsynonymous | 0 | 1 |
| SAE1         | chr19 | 47673111/G//A | nonsynonymous | 0 | 1 |
| ZNF444       | chr19 | 56671207/C//T | synonymous    | 0 | 1 |
| PLCB1        | chr20 | 8630101/G//A  | synonymous    | 0 | 1 |
| SYNDIG1      | chr20 | 24524124/G//A | nonsynonymous | 0 | 1 |
| UQCC1        | chr20 | 33981915/C//A | nonsynonymous | 0 | 1 |
|              | chr20 | 35090953/T//C | synonymous    | 0 | 1 |
|              | chr20 | 50714973/T//C | synonymous    | 0 | 1 |
| VAPB         | chr20 | 57015987/A//G | nonsynonymous | 0 | 1 |
| NPEPL1       | chr20 | 57289713/C//T | nonsynonymous | 0 | 1 |
| HRH3         | chr20 | 60791008/C//T | synonymous    | 0 | 1 |
| COL20A1      | chr20 | 61945231/A//G | synonymous    | 0 | 1 |
| ADAMTS5      | chr21 | 28338228/C//T | synonymous    | 0 | 1 |
| CLDN8        | chr21 | 31587732/G//C | nonsynonymous | 0 | 1 |
| KRTAP11-1    | chr21 | 32253305/A//T | synonymous    | 0 | 1 |
| HUNK         | chr21 | 33346963/C//T | synonymous    | 0 | 1 |
| PRR5-ARHGAP8 | chr22 | 45110529/T//A | nonsynonymous | 0 | 1 |
| SHOX         | chrX  | 591551/C//A   | synonymous    | 0 | 1 |
| GPR143       | chrX  | 9711599/G//C  | synonymous    | 0 | 1 |
| MAGEB3       | chrX  | 30254415/T//C | nonsynonymous | 0 | 1 |
| ERCC6L       | chrX  | 71426614/A//G | nonsynonymous | 0 | 1 |
| NAP1L3       | chrX  | 92928038/C//T | nonsynonymous | 0 | 1 |
| ACAP3        | chr1  | 1235954/C//A  | nonsynonymous | 1 | 0 |
| MIB2         | chr1  | 1565891/G//T  | nonsynonymous | 1 | 0 |
| GNB1         | chr1  | 1756945/C//A  | synonymous    | 1 | 0 |
| GABRD        | chr1  | 1961430/G//T  | synonymous    | 1 | 0 |
|              | chr1  | 2129512/T//C  | synonymous    | 1 | 0 |
| CCDC27       | chr1  | 3669346/C//G  | nonsynonymous | 1 | 0 |
| CHD5         | chr1  | 6185207/G//A  | synonymous    | 1 | 0 |
| CHD5         | chr1  | 6211151/C//A  | nonsynonymous | 1 | 0 |
| TAS1R1       | chr1  | 6631169/G//T  | nonsynonymous | 1 | 0 |
| CAMTA1       | chr1  | 7721898/C//A  | synonymous    | 1 | 0 |
| CAMTA1       | chr1  | 7725013/G//T  | synonymous    | 1 | 0 |
| ENO1         | chr1  | 8926507/C//G  | nonsynonymous | 1 | 0 |
| SLC2A5       | chr1  | 9107753/G//C  | nonsynonymous | 1 | 0 |
| KIF1B        | chr1  | 10327445/A//G | nonsynonymous | 1 | 0 |
| MTOR         | chr1  | 11205085/C//A | nonsynonymous | 1 | 0 |
| UBIAD1       | chr1  | 11346189/G//T | synonymous    | 1 | 0 |
| VPS13D       | chr1  | 12439628/G//T | nonsynonymous | 1 | 0 |
| VPS13D       | chr1  | 12446352/G//A | nonsynonymous | 1 | 0 |
| PRAMEF2      | chr1  | 12920015/A//G | nonsynonymous | 1 | 0 |
| LRRC38       | chr1  | 13839697/A//T | nonsynonymous | 1 | 0 |
| CTRC         | chr1  | 15766827/C//A | synonymous    | 1 | 0 |
| SPEN         | chr1  | 16259386/G//T | synonymous    | 1 | 0 |
| MFAP2        | chr1  | 17302155/G//T | nonsynonymous | 1 | 0 |
| ACTL8        | chr1  | 18153030/C//G | synonymous    | 1 | 0 |
| TAS1R2       | chr1  | 19181103/C//A | nonsynonymous | 1 | 0 |
| UBR4         | chr1  | 19420517/C//A | synonymous    | 1 | 0 |
| EMC1         | chr1  | 19571414/C//A | nonsynonymous | 1 | 0 |

|             |      |                     |               |   |   |
|-------------|------|---------------------|---------------|---|---|
| AKR7A2      | chr1 | 19633494/A//T       | nonsynonymous | 1 | 0 |
| KIF17       | chr1 | 21043961/G//T       | synonymous    | 1 | 0 |
| ECE1        | chr1 | 21605735/C//T       | nonsynonymous | 1 | 0 |
| USP48       | chr1 | 22063126/G//C       | synonymous    | 1 | 0 |
| HSPG2       | chr1 | 22204947/C//A       | nonsynonymous | 1 | 0 |
| CELA3B      | chr1 | 22310253/A//T       | synonymous    | 1 | 0 |
| MYOM3       | chr1 | 24419500/A//T       | nonsynonymous | 1 | 0 |
| GRHL3       | chr1 | 24663166/A//T       | nonsynonymous | 1 | 0 |
| GRHL3       | chr1 | 24663628/C//A       | nonsynonymous | 1 | 0 |
| GRHL3       | chr1 | 24664207/C//T       | synonymous    | 1 | 0 |
| GPR3        | chr1 | 27720645/G//T       | nonsynonymous | 1 | 0 |
| THEMIS2     | chr1 | 28209364/T//G       | nonsynonymous | 1 | 0 |
| EYA3        | chr1 | 28362171/G//A       | nonsynonymous | 1 | 0 |
| GMEB1       | chr1 | 29040740/C//T       | nonsynonymous | 1 | 0 |
| MATN1       | chr1 | 31194355/G//T       | nonsynonymous | 1 | 0 |
| TMEM39B     | chr1 | 32557504/TGAGGTG//T | nonsynonymous | 1 | 0 |
| CSMD2       | chr1 | 34049336/A//T       | synonymous    | 1 | 0 |
| C1orf94     | chr1 | 34666433/G//C       | nonsynonymous | 1 | 0 |
| GJB5        | chr1 | 35223627/C//A       | nonsynonymous | 1 | 0 |
| DLGAP3      | chr1 | 35365290/G//T       | nonsynonymous | 1 | 0 |
| C1orf216    | chr1 | 36181544/G//A       | nonsynonymous | 1 | 0 |
| CLSPN       | chr1 | 36209102/C//G       | nonsynonymous | 1 | 0 |
| MFSD2A      | chr1 | 40432276/A//T       | nonsynonymous | 1 | 0 |
| RLF         | chr1 | 40702002/C//T       | nonsynonymous | 1 | 0 |
| SMAP2       | chr1 | 40874407/A//T       | nonsynonymous | 1 | 0 |
| HIVEP3      | chr1 | 42048579/T//C       | synonymous    | 1 | 0 |
| ZNF691      | chr1 | 43317307/C//T       | synonymous    | 1 | 0 |
| SZT2        | chr1 | 43908593/G//T       | nonsynonymous | 1 | 0 |
| DPH2        | chr1 | 44436798/C//A       | nonsynonymous | 1 | 0 |
| SLC6A9      | chr1 | 44468176/C//A       | synonymous    | 1 | 0 |
| KIF2C       | chr1 | 45223241/C//A       | nonsynonymous | 1 | 0 |
| PTCH2       | chr1 | 45293282/G//C       | synonymous    | 1 | 0 |
| EIF2B3      | chr1 | 45345608/C//A       | nonsynonymous | 1 | 0 |
| TESK2       | chr1 | 45887468/C//A       | nonsynonymous | 1 | 0 |
| NASP        | chr1 | 46083822/A//G       | synonymous    | 1 | 0 |
| CCDC17      | chr1 | 46088944/C//T       | synonymous    | 1 | 0 |
| CYP4B1      | chr1 | 47282856/G//T       | synonymous    | 1 | 0 |
| AGBL4       | chr1 | 49052792/C//T       | nonsynonymous | 1 | 0 |
| KTI12       | chr1 | 52499142/C//A       | nonsynonymous | 1 | 0 |
| ZCCHC11     | chr1 | 52962674/C//G       | synonymous    | 1 | 0 |
| ZYG11B      | chr1 | 53287133/G//A       | synonymous    | 1 | 0 |
| SCP2        | chr1 | 53440475/G//T       | nonsynonymous | 1 | 0 |
| ACOT11      | chr1 | 55070840/T//A       | nonsynonymous | 1 | 0 |
| MROH7       | chr1 | 55139712/G//T       | synonymous    | 1 | 0 |
| TMEM61      | chr1 | 55457763/G//T       | nonsynonymous | 1 | 0 |
| C1orf168    | chr1 | 57209866/C//A       | synonymous    | 1 | 0 |
| DAB1        | chr1 | 57476839/G//C       | nonsynonymous | 1 | 0 |
| FGGY        | chr1 | 60228215/G//C       | nonsynonymous | 1 | 0 |
| HOOK1       | chr1 | 60309173/C//T       | nonsynonymous | 1 | 0 |
| ANGPTL3     | chr1 | 63066810/G//A       | nonsynonymous | 1 | 0 |
| DNAJC6      | chr1 | 65855309/A//T       | nonsynonymous | 1 | 0 |
| DNAJC6      | chr1 | 65858430/G//T       | nonsynonymous | 1 | 0 |
| DNAJC6      | chr1 | 65860720/G//T       | synonymous    | 1 | 0 |
| PDE4B       | chr1 | 66829252/G//T       | nonsynonymous | 1 | 0 |
| RPE65       | chr1 | 68895518/G//T       | synonymous    | 1 | 0 |
| PTGER3      | chr1 | 71513147/C//A       | synonymous    | 1 | 0 |
| NEGR1       | chr1 | 72163767/C//A       | nonsynonymous | 1 | 0 |
| FPGT-TNNI3K | chr1 | 74834924/G//C       | nonsynonymous | 1 | 0 |
| ST6GALNAC3  | chr1 | 76877795/A//G       | nonsynonymous | 1 | 0 |
| ZZZ3        | chr1 | 78098988/C//A       | nonsynonymous | 1 | 0 |
| FUBP1       | chr1 | 78430900/T//G       | nonsynonymous | 1 | 0 |
| ADGRL4      | chr1 | 79470755/C//A       | nonsynonymous | 1 | 0 |
| ADGRL2      | chr1 | 82450383/C//T       | synonymous    | 1 | 0 |
| SSX2IP      | chr1 | 85116068/T//C       | synonymous    | 1 | 0 |
| CLCA2       | chr1 | 86890045/G//A       | nonsynonymous | 1 | 0 |
| HS2ST1      | chr1 | 87569200/G//T       | nonsynonymous | 1 | 0 |
| PKN2        | chr1 | 89236050/G//C       | nonsynonymous | 1 | 0 |
| GBP4        | chr1 | 89658756/G//A       | synonymous    | 1 | 0 |
| GBP5        | chr1 | 89726344/C//T       | synonymous    | 1 | 0 |
| LRRC8D      | chr1 | 90399906/G//C       | nonsynonymous | 1 | 0 |

|          |      |                |               |   |   |
|----------|------|----------------|---------------|---|---|
| GLMN     | chr1 | 92713454/T//A  | synonymous    | 1 | 0 |
| MTF2     | chr1 | 93594878/G//T  | nonsynonymous | 1 | 0 |
| ARHGAP29 | chr1 | 94674893/T//C  | synonymous    | 1 | 0 |
| SASS6    | chr1 | 100584640/T//A | synonymous    | 1 | 0 |
| COL11A1  | chr1 | 103400630/C//A | nonsynonymous | 1 | 0 |
| COL11A1  | chr1 | 103469999/C//A | nonsynonymous | 1 | 0 |
| AMY2B    | chr1 | 104116534/G//A | nonsynonymous | 1 | 0 |
| VAV3     | chr1 | 108247209/C//T | synonymous    | 1 | 0 |
| NBPF4    | chr1 | 108771772/G//T | nonsynonymous | 1 | 0 |
| CLCC1    | chr1 | 109484102/G//A | nonsynonymous | 1 | 0 |
| GNAT2    | chr1 | 110148698/C//G | nonsynonymous | 1 | 0 |
| EPS8L3   | chr1 | 110295795/G//A | synonymous    | 1 | 0 |
| SLC6A17  | chr1 | 110741173/C//G | synonymous    | 1 | 0 |
| PIFO     | chr1 | 111889272/G//T | synonymous    | 1 | 0 |
| FAM19A3  | chr1 | 113264921/G//T | nonsynonymous | 1 | 0 |
| PHTF1    | chr1 | 114249314/G//T | nonsynonymous | 1 | 0 |
| HIPK1    | chr1 | 114483634/G//T | nonsynonymous | 1 | 0 |
| SYT6     | chr1 | 114680185/T//A | nonsynonymous | 1 | 0 |
| CSDE1    | chr1 | 115261252/C//A | nonsynonymous | 1 | 0 |
| CSDE1    | chr1 | 115276439/C//A | nonsynonymous | 1 | 0 |
| CD101    | chr1 | 117576700/G//A | nonsynonymous | 1 | 0 |
| TTF2     | chr1 | 117617759/A//T | nonsynonymous | 1 | 0 |
| MAN1A2   | chr1 | 118003134/G//A | nonsynonymous | 1 | 0 |
| WDR3     | chr1 | 118496689/A//T | nonsynonymous | 1 | 0 |
| SPAG17   | chr1 | 118642234/G//T | nonsynonymous | 1 | 0 |
| TBX15    | chr1 | 119474381/C//G | synonymous    | 1 | 0 |
| NBPF8    | chr1 | 144618162/C//A | nonsynonymous | 1 | 0 |
| NBPF8    | chr1 | 144828545/A//T | nonsynonymous | 1 | 0 |
| ANKRD34A | chr1 | 145473202/C//G | synonymous    | 1 | 0 |
| PIAS3    | chr1 | 145578475/C//A | synonymous    | 1 | 0 |
| RNF115   | chr1 | 145611213/C//G | synonymous    | 1 | 0 |
| ENSA     | chr1 | 150601985/G//A | synonymous    | 1 | 0 |
| CTSS     | chr1 | 150724348/C//T | nonsynonymous | 1 | 0 |
| SEMA6C   | chr1 | 151115009/G//T | nonsynonymous | 1 | 0 |
| SNX27    | chr1 | 151664947/G//C | nonsynonymous | 1 | 0 |
| TCHHL1   | chr1 | 152057729/A//G | nonsynonymous | 1 | 0 |
| HRNR     | chr1 | 152191725/G//T | nonsynonymous | 1 | 0 |
| FLG      | chr1 | 152282080/C//G | nonsynonymous | 1 | 0 |
| FLG2     | chr1 | 152326924/G//A | nonsynonymous | 1 | 0 |
| LCE3A    | chr1 | 152595410/G//A | nonsynonymous | 1 | 0 |
| LCE2D    | chr1 | 152636684/C//T | nonsynonymous | 1 | 0 |
| LELP1    | chr1 | 153177226/G//T | nonsynonymous | 1 | 0 |
|          | chr1 | 154131413/T//A | synonymous    | 1 | 0 |
| CHRNA2   | chr1 | 154544067/C//T | synonymous    | 1 | 0 |
| KCNN3    | chr1 | 154744636/G//A | synonymous    | 1 | 0 |
| ASH1L    | chr1 | 155429674/G//A | nonsynonymous | 1 | 0 |
| ASH1L    | chr1 | 155449717/T//C | nonsynonymous | 1 | 0 |
| RIT1     | chr1 | 155874548/G//C | nonsynonymous | 1 | 0 |
| IQGAP3   | chr1 | 156498822/T//A | nonsynonymous | 1 | 0 |
| TTC24    | chr1 | 156551243/G//T | nonsynonymous | 1 | 0 |
| TTC24    | chr1 | 156551789/G//A | synonymous    | 1 | 0 |
| TTC24    | chr1 | 156554738/G//A | nonsynonymous | 1 | 0 |
| GPATCH4  | chr1 | 156571225/G//A | nonsynonymous | 1 | 0 |
| PEAR1    | chr1 | 156877988/A//T | nonsynonymous | 1 | 0 |
| PEAR1    | chr1 | 156883668/G//T | nonsynonymous | 1 | 0 |
| FCRL5    | chr1 | 157491068/G//C | nonsynonymous | 1 | 0 |
| FCRL2    | chr1 | 157737060/C//A | nonsynonymous | 1 | 0 |
| FCRL1    | chr1 | 157772370/G//A | nonsynonymous | 1 | 0 |
| CD1B     | chr1 | 158299284/C//T | synonymous    | 1 | 0 |
| CD1B     | chr1 | 158300699/G//T | nonsynonymous | 1 | 0 |
| OR6P1    | chr1 | 158532692/G//T | nonsynonymous | 1 | 0 |
| SPTA1    | chr1 | 158624446/G//T | synonymous    | 1 | 0 |
| SPTA1    | chr1 | 158631132/G//A | synonymous    | 1 | 0 |
| OR6K6    | chr1 | 158725482/T//A | nonsynonymous | 1 | 0 |
| PYHIN1   | chr1 | 158912034/G//T | nonsynonymous | 1 | 0 |
| AIM2     | chr1 | 159035962/T//A | nonsynonymous | 1 | 0 |
| FCRL6    | chr1 | 159778812/G//T | synonymous    | 1 | 0 |
| KCNJ9    | chr1 | 160054422/T//C | nonsynonymous | 1 | 0 |
| ATP1A4   | chr1 | 160136392/G//T | synonymous    | 1 | 0 |
| COPA     | chr1 | 160305052/G//A | nonsynonymous | 1 | 0 |

|          |      |                |               |   |   |
|----------|------|----------------|---------------|---|---|
| NCSTN    | chr1 | 160324041/G//C | nonsynonymous | 1 | 0 |
| USP21    | chr1 | 161132433/G//T | nonsynonymous | 1 | 0 |
| ADAMTS4  | chr1 | 161163802/C//A | nonsynonymous | 1 | 0 |
| FCGR2B   | chr1 | 161647135/G//A | nonsynonymous | 1 | 0 |
| OLFML2B  | chr1 | 161967651/T//A | nonsynonymous | 1 | 0 |
| DDR2     | chr1 | 162737130/G//T | nonsynonymous | 1 | 0 |
| CCDC190  | chr1 | 162825067/G//T | nonsynonymous | 1 | 0 |
| RGS4     | chr1 | 163044229/G//T | nonsynonymous | 1 | 0 |
| DUSP27   | chr1 | 167095301/C//A | synonymous    | 1 | 0 |
| SELP     | chr1 | 169578823/C//T | nonsynonymous | 1 | 0 |
|          | chr1 | 170010892/G//A | synonymous    | 1 | 0 |
| PRRX1    | chr1 | 170689014/G//T | nonsynonymous | 1 | 0 |
|          | chr1 | 171227186/G//C | synonymous    | 1 | 0 |
| FMO4     | chr1 | 171303628/G//T | synonymous    | 1 | 0 |
| RC3H1    | chr1 | 173931097/G//A | synonymous    | 1 | 0 |
| TNN      | chr1 | 175052996/C//A | nonsynonymous | 1 | 0 |
| TNR      | chr1 | 175362962/G//T | nonsynonymous | 1 | 0 |
| PAPPA2   | chr1 | 176668287/C//A | nonsynonymous | 1 | 0 |
| BRINP2   | chr1 | 177199214/G//T | nonsynonymous | 1 | 0 |
| SEC16B   | chr1 | 177908869/G//C | nonsynonymous | 1 | 0 |
|          | chr1 | 178490864/C//A | synonymous    | 1 | 0 |
|          | chr1 | 178490876/T//C | synonymous    | 1 | 0 |
| ACBD6    | chr1 | 180399365/T//A | synonymous    | 1 | 0 |
| CACNA1E  | chr1 | 181701874/G//T | synonymous    | 1 | 0 |
| CACNA1E  | chr1 | 181765872/C//T | nonsynonymous | 1 | 0 |
| HMCN1    | chr1 | 186037077/C//T | nonsynonymous | 1 | 0 |
| HMCN1    | chr1 | 186147581/G//C | nonsynonymous | 1 | 0 |
| HMCN1    | chr1 | 186151308/G//A | nonsynonymous | 1 | 0 |
| RGS21    | chr1 | 192316478/T//G | nonsynonymous | 1 | 0 |
| ASPM     | chr1 | 197087109/C//A | nonsynonymous | 1 | 0 |
| CRB1     | chr1 | 197390318/G//T | nonsynonymous | 1 | 0 |
|          | chr1 | 197704924/C//T | synonymous    | 1 | 0 |
| PTPRC    | chr1 | 198721784/C//A | nonsynonymous | 1 | 0 |
| GPR25    | chr1 | 200842836/G//C | nonsynonymous | 1 | 0 |
| CACNA1S  | chr1 | 201042764/G//T | synonymous    | 1 | 0 |
| IGFN1    | chr1 | 201177070/G//A | nonsynonymous | 1 | 0 |
| IGFN1    | chr1 | 201177909/G//A | synonymous    | 1 | 0 |
| IGFN1    | chr1 | 201195075/G//T | nonsynonymous | 1 | 0 |
| LGR6     | chr1 | 202273741/G//T | synonymous    | 1 | 0 |
| KDM5B    | chr1 | 202710536/T//A | synonymous    | 1 | 0 |
| SOX13    | chr1 | 204092265/C//A | nonsynonymous | 1 | 0 |
| PIK3C2B  | chr1 | 204438313/C//A | synonymous    | 1 | 0 |
| NFASC    | chr1 | 204966472/C//A | nonsynonymous | 1 | 0 |
| NFASC    | chr1 | 204985616/C//A | nonsynonymous | 1 | 0 |
| IKBKE    | chr1 | 206666663/C//T | nonsynonymous | 1 | 0 |
|          | chr1 | 206730882/G//T | synonymous    | 1 | 0 |
| PLXNA2   | chr1 | 208215585/C//A | nonsynonymous | 1 | 0 |
| PLXNA2   | chr1 | 208217876/C//T | nonsynonymous | 1 | 0 |
| HSD11B1  | chr1 | 209907680/C//A | synonymous    | 1 | 0 |
| KCNH1    | chr1 | 210856884/C//G | synonymous    | 1 | 0 |
| LPGAT1   | chr1 | 211924390/C//A | nonsynonymous | 1 | 0 |
| PROX1    | chr1 | 214170020/C//G | nonsynonymous | 1 | 0 |
| USH2A    | chr1 | 216062137/C//A | nonsynonymous | 1 | 0 |
| EPRS     | chr1 | 220180549/T//A | synonymous    | 1 | 0 |
| RAB3GAP2 | chr1 | 220356222/C//A | nonsynonymous | 1 | 0 |
| MARK1    | chr1 | 220808778/G//T | nonsynonymous | 1 | 0 |
| MIA3     | chr1 | 222802598/A//T | nonsynonymous | 1 | 0 |
| CNIH3    | chr1 | 224922394/C//T | synonymous    | 1 | 0 |
| CNIH3    | chr1 | 224927090/G//A | synonymous    | 1 | 0 |
| DNAH14   | chr1 | 225239245/G//T | nonsynonymous | 1 | 0 |
| PYCR2    | chr1 | 226109632/C//A | nonsynonymous | 1 | 0 |
| ZNF678   | chr1 | 227834330/G//C | nonsynonymous | 1 | 0 |
| OBSCN    | chr1 | 228412363/G//T | nonsynonymous | 1 | 0 |
| OBSCN    | chr1 | 228469849/G//T | nonsynonymous | 1 | 0 |
| OBSCN    | chr1 | 228525715/G//C | nonsynonymous | 1 | 0 |
| TRIM11   | chr1 | 228582954/C//A | nonsynonymous | 1 | 0 |
| HIST3H3  | chr1 | 228612704/G//T | nonsynonymous | 1 | 0 |
| MAP3K21  | chr1 | 233514839/A//T | nonsynonymous | 1 | 0 |
| TARBP1   | chr1 | 234603391/A//T | nonsynonymous | 1 | 0 |
| ACTN2    | chr1 | 236911022/G//A | nonsynonymous | 1 | 0 |



|         |      |                |               |   |   |
|---------|------|----------------|---------------|---|---|
| RYR2    | chr1 | 237604687/C//G | nonsynonymous | 1 | 0 |
| RYR2    | chr1 | 237656290/G//T | nonsynonymous | 1 | 0 |
| RYR2    | chr1 | 237675019/G//T | nonsynonymous | 1 | 0 |
| RYR2    | chr1 | 237693784/G//A | synonymous    | 1 | 0 |
| RYR2    | chr1 | 237729917/C//G | nonsynonymous | 1 | 0 |
| RYR2    | chr1 | 237777432/G//T | synonymous    | 1 | 0 |
| RYR2    | chr1 | 237947123/C//A | synonymous    | 1 | 0 |
| RYR2    | chr1 | 237947478/A//T | nonsynonymous | 1 | 0 |
| RYR2    | chr1 | 237948142/C//T | nonsynonymous | 1 | 0 |
| RYR2    | chr1 | 237948251/T//A | synonymous    | 1 | 0 |
| RYR2    | chr1 | 237961330/C//A | synonymous    | 1 | 0 |
| RYR2    | chr1 | 237993857/A//T | nonsynonymous | 1 | 0 |
| ZP4     | chr1 | 238048766/A//C | nonsynonymous | 1 | 0 |
| ZP4     | chr1 | 238053955/G//C | synonymous    | 1 | 0 |
| CHRM3   | chr1 | 240070855/C//A | nonsynonymous | 1 | 0 |
| FMN2    | chr1 | 240371908/C//A | nonsynonymous | 1 | 0 |
| FH      | chr1 | 241665767/C//T | synonymous    | 1 | 0 |
| WDR64   | chr1 | 241932739/T//A | synonymous    | 1 | 0 |
| KIF26B  | chr1 | 245704135/C//A | synonymous    | 1 | 0 |
| KIF26B  | chr1 | 245850203/C//T | synonymous    | 1 | 0 |
| ZNF669  | chr1 | 247263875/A//T | nonsynonymous | 1 | 0 |
| VN1R5   | chr1 | 247420311/C//A | nonsynonymous | 1 | 0 |
| OR2C3   | chr1 | 247695143/C//A | nonsynonymous | 1 | 0 |
| OR2G2   | chr1 | 247752220/C//G | nonsynonymous | 1 | 0 |
| OR2G2   | chr1 | 247752232/G//T | nonsynonymous | 1 | 0 |
| OR2L8   | chr1 | 248112472/G//T | nonsynonymous | 1 | 0 |
| OR2AK2  | chr1 | 248129578/A//T | synonymous    | 1 | 0 |
| OR2M5   | chr1 | 248309236/A//T | nonsynonymous | 1 | 0 |
| OR2T12  | chr1 | 248458616/C//A | nonsynonymous | 1 | 0 |
| OR14C36 | chr1 | 248512343/C//A | synonymous    | 1 | 0 |
| OR14C36 | chr1 | 248512376/C//A | nonsynonymous | 1 | 0 |
| OR2T4   | chr1 | 248525483/C//A | nonsynonymous | 1 | 0 |
| OR2T34  | chr1 | 248737590/C//G | nonsynonymous | 1 | 0 |
| SH3BP5L | chr1 | 249107317/G//T | nonsynonymous | 1 | 0 |
| PXDN    | chr2 | 1670260/T//A   | nonsynonymous | 1 | 0 |
|         | chr2 | 18768207/A//T  | synonymous    | 1 | 0 |
| APOB    | chr2 | 21242715/C//A  | nonsynonymous | 1 | 0 |
| APOB    | chr2 | 21256307/G//C  | nonsynonymous | 1 | 0 |
| WDCP    | chr2 | 24262248/C//A  | nonsynonymous | 1 | 0 |
| ADCY3   | chr2 | 25064226/C//A  | synonymous    | 1 | 0 |
| OTOF    | chr2 | 26693521/T//A  | synonymous    | 1 | 0 |
| PRR30   | chr2 | 27360076/G//A  | synonymous    | 1 | 0 |
| IFT172  | chr2 | 27706229/C//A  | nonsynonymous | 1 | 0 |
| GCKR    | chr2 | 27719811/C//A  | nonsynonymous | 1 | 0 |
| GCKR    | chr2 | 27722028/G//A  | nonsynonymous | 1 | 0 |
| PLB1    | chr2 | 28827543/G//T  | nonsynonymous | 1 | 0 |
| PLB1    | chr2 | 28865750/G//T  | synonymous    | 1 | 0 |
| VIT     | chr2 | 37035650/C//A  | nonsynonymous | 1 | 0 |
| DHX57   | chr2 | 39088627/G//C  | nonsynonymous | 1 | 0 |
| PRKCE   | chr2 | 46412019/G//T  | nonsynonymous | 1 | 0 |
| FSHR    | chr2 | 49195848/C//A  | nonsynonymous | 1 | 0 |
| FSHR    | chr2 | 49216126/T//C  | nonsynonymous | 1 | 0 |
| NRXN1   | chr2 | 50149137/C//A  | nonsynonymous | 1 | 0 |
| NRXN1   | chr2 | 50280408/C//A  | nonsynonymous | 1 | 0 |
| NRXN1   | chr2 | 50724838/C//A  | nonsynonymous | 1 | 0 |
| NRXN1   | chr2 | 51255337/C//A  | synonymous    | 1 | 0 |
| MTIF2   | chr2 | 55490790/G//C  | nonsynonymous | 1 | 0 |
| CCDC88A | chr2 | 55562124/T//A  | nonsynonymous | 1 | 0 |
| BCL11A  | chr2 | 60687814/C//A  | nonsynonymous | 1 | 0 |
| WDCP    | chr2 | 63631656/C//A  | nonsynonymous | 1 | 0 |
| CD207   | chr2 | 71058930/C//A  | synonymous    | 1 | 0 |
| ZNF638  | chr2 | 71626697/G//T  | nonsynonymous | 1 | 0 |
| EXOC6B  | chr2 | 73053148/T//A  | synonymous    | 1 | 0 |
| WBP1    | chr2 | 74685668/G//A  | synonymous    | 1 | 0 |
| REG3A   | chr2 | 79385834/G//A  | synonymous    | 1 | 0 |
| CTNNA2  | chr2 | 80101358/C//G  | nonsynonymous | 1 | 0 |
| CTNNA2  | chr2 | 80136775/T//A  | nonsynonymous | 1 | 0 |
| DNAH6   | chr2 | 84806759/G//A  | nonsynonymous | 1 | 0 |
| DNAH6   | chr2 | 84896602/G//T  | nonsynonymous | 1 | 0 |
| EIF2AK3 | chr2 | 88874870/T//C  | nonsynonymous | 1 | 0 |

|            |      |                |               |   |   |
|------------|------|----------------|---------------|---|---|
| ZNF514     | chr2 | 95818951/C//A  | synonymous    | 1 | 0 |
| ZAP70      | chr2 | 98354493/G//C  | nonsynonymous | 1 | 0 |
| TMEM131    | chr2 | 98378617/G//A  | synonymous    | 1 | 0 |
| CNGA3      | chr2 | 99012521/C//G  | nonsynonymous | 1 | 0 |
| AFF3       | chr2 | 100210591/G//T | nonsynonymous | 1 | 0 |
| MAP4K4     | chr2 | 102314998/A//T | nonsynonymous | 1 | 0 |
| MAP4K4     | chr2 | 102315000/G//T | nonsynonymous | 1 | 0 |
| SLC9A4     | chr2 | 103142737/G//C | nonsynonymous | 1 | 0 |
| SLC9A2     | chr2 | 103281559/G//T | nonsynonymous | 1 | 0 |
| SULT1C4    | chr2 | 109003886/T//C | nonsynonymous | 1 | 0 |
| RANBP2     | chr2 | 109336035/G//A | synonymous    | 1 | 0 |
| RANBP2     | chr2 | 109336049/A//C | synonymous    | 1 | 0 |
| RANBP2     | chr2 | 109398836/T//C | nonsynonymous | 1 | 0 |
| SEPT10     | chr2 | 110322096/T//A | nonsynonymous | 1 | 0 |
| FBLN7      | chr2 | 112917415/G//T | synonymous    | 1 | 0 |
| PSD4       | chr2 | 113940630/G//T | synonymous    | 1 | 0 |
| PSD4       | chr2 | 113940977/A//G | nonsynonymous | 1 | 0 |
| CFAP221    | chr2 | 120362858/C//T | nonsynonymous | 1 | 0 |
| CNTNAP5    | chr2 | 125204369/C//T | nonsynonymous | 1 | 0 |
| CNTNAP5    | chr2 | 125547491/C//A | nonsynonymous | 1 | 0 |
| MYO7B      | chr2 | 128363480/T//C | nonsynonymous | 1 | 0 |
| GPR17      | chr2 | 128408489/C//T | synonymous    | 1 | 0 |
| CCDC74B    | chr2 | 130897848/C//A | nonsynonymous | 1 | 0 |
| TUBA3E     | chr2 | 130953849/A//T | nonsynonymous | 1 | 0 |
| PTPN18     | chr2 | 131130495/G//T | synonymous    | 1 | 0 |
| POTEE      | chr2 | 132021417/G//T | nonsynonymous | 1 | 0 |
| TUBA3D     | chr2 | 132236893/C//T | nonsynonymous | 1 | 0 |
| LCT        | chr2 | 136567525/C//T | nonsynonymous | 1 | 0 |
| LCT        | chr2 | 136570302/G//C | synonymous    | 1 | 0 |
| LRP1B      | chr2 | 141135751/C//T | nonsynonymous | 1 | 0 |
| LRP1B      | chr2 | 141459401/C//T | nonsynonymous | 1 | 0 |
| LRP1B      | chr2 | 141739744/C//T | nonsynonymous | 1 | 0 |
| LRP1B      | chr2 | 141739804/G//T | nonsynonymous | 1 | 0 |
| ARHGAP15   | chr2 | 144381777/G//A | nonsynonymous | 1 | 0 |
| KIF5C      | chr2 | 149847569/C//T | nonsynonymous | 1 | 0 |
| NEB        | chr2 | 152550854/C//G | nonsynonymous | 1 | 0 |
| FMNL2      | chr2 | 153484896/G//A | nonsynonymous | 1 | 0 |
| GPD2       | chr2 | 157426595/C//G | synonymous    | 1 | 0 |
| CYTIP      | chr2 | 158272636/G//A | synonymous    | 1 | 0 |
| BAZ2B      | chr2 | 160287388/G//C | nonsynonymous | 1 | 0 |
| LY75-CD302 | chr2 | 160729091/T//C | nonsynonymous | 1 | 0 |
| TBR1       | chr2 | 162280791/C//T | synonymous    | 1 | 0 |
| SCN3A      | chr2 | 165954039/A//T | synonymous    | 1 | 0 |
| SCN3A      | chr2 | 165994388/C//A | nonsynonymous | 1 | 0 |
| SCN1A      | chr2 | 166848612/C//A | nonsynonymous | 1 | 0 |
| SCN1A      | chr2 | 166892973/T//A | nonsynonymous | 1 | 0 |
| XIRP2      | chr2 | 168099648/G//C | nonsynonymous | 1 | 0 |
| XIRP2      | chr2 | 168100492/C//A | nonsynonymous | 1 | 0 |
| XIRP2      | chr2 | 168106654/C//A | nonsynonymous | 1 | 0 |
| LRP2       | chr2 | 170026237/C//A | nonsynonymous | 1 | 0 |
| LRP2       | chr2 | 170134384/C//T | nonsynonymous | 1 | 0 |
| LRP2       | chr2 | 170136881/C//T | nonsynonymous | 1 | 0 |
| BBS5       | chr2 | 170350326/A//T | nonsynonymous | 1 | 0 |
| ATF2       | chr2 | 175957885/T//G | nonsynonymous | 1 | 0 |
| HOXD9      | chr2 | 176988014/C//A | nonsynonymous | 1 | 0 |
| HOXD8      | chr2 | 176995172/C//A | synonymous    | 1 | 0 |
| AGPS       | chr2 | 178326618/C//T | synonymous    | 1 | 0 |
| TTN        | chr2 | 179422009/G//A | nonsynonymous | 1 | 0 |
| TTN        | chr2 | 179434772/G//T | nonsynonymous | 1 | 0 |
| TTN        | chr2 | 179454730/C//T | synonymous    | 1 | 0 |
| TTN        | chr2 | 179456539/G//C | nonsynonymous | 1 | 0 |
| TTN        | chr2 | 179472135/T//G | nonsynonymous | 1 | 0 |
| TTN        | chr2 | 179485016/G//T | nonsynonymous | 1 | 0 |
| TTN        | chr2 | 179543147/C//A | nonsynonymous | 1 | 0 |
| TTN        | chr2 | 179599501/C//A | synonymous    | 1 | 0 |
| TTN        | chr2 | 179605455/G//C | nonsynonymous | 1 | 0 |
|            | chr2 | 179621125/C//T | synonymous    | 1 | 0 |
| TTN        | chr2 | 179638098/T//A | nonsynonymous | 1 | 0 |
| TTN        | chr2 | 179640203/C//A | nonsynonymous | 1 | 0 |
| TTN        | chr2 | 179659840/C//A | nonsynonymous | 1 | 0 |

|            |      |                 |               |   |   |
|------------|------|-----------------|---------------|---|---|
| CCDC141    | chr2 | 179825969/T//A  | nonsynonymous | 1 | 0 |
| CWC22      | chr2 | 180842970/G//A  | synonymous    | 1 | 0 |
| SSFA2      | chr2 | 182792942/G//T  | nonsynonymous | 1 | 0 |
| NCKAP1     | chr2 | 183817611/T//TA | nonsynonymous | 1 | 0 |
| DUSP19     | chr2 | 183943498/G//T  | synonymous    | 1 | 0 |
| FSIP2      | chr2 | 186658414/G//T  | nonsynonymous | 1 | 0 |
| FSIP2      | chr2 | 186664547/C//A  | nonsynonymous | 1 | 0 |
| FSIP2      | chr2 | 186668269/G//T  | nonsynonymous | 1 | 0 |
| MSTN       | chr2 | 190922180/C//A  | nonsynonymous | 1 | 0 |
| DNAH7      | chr2 | 196698943/C//T  | synonymous    | 1 | 0 |
| CCDC150    | chr2 | 197597303/G//T  | synonymous    | 1 | 0 |
| ANKRD44    | chr2 | 197990648/C//A  | synonymous    | 1 | 0 |
| HSPE1-MOB4 | chr2 | 198415298/C//T  | synonymous    | 1 | 0 |
| ALS2CR11   | chr2 | 202483856/C//G  | synonymous    | 1 | 0 |
| MPP4       | chr2 | 202545704/G//T  | synonymous    | 1 | 0 |
| ICOS       | chr2 | 204821386/A//T  | synonymous    | 1 | 0 |
| ZDBF2      | chr2 | 207171663/A//C  | nonsynonymous | 1 | 0 |
| ZDBF2      | chr2 | 207174438/G//C  | nonsynonymous | 1 | 0 |
| ZDBF2      | chr2 | 207175173/G//A  | nonsynonymous | 1 | 0 |
| LOC200726  | chr2 | 207509373/G//T  | nonsynonymous | 1 | 0 |
| LOC200726  | chr2 | 207513517/A//G  | synonymous    | 1 | 0 |
| UNC80      | chr2 | 210658544/C//A  | nonsynonymous | 1 | 0 |
| UNC80      | chr2 | 210704155/G//T  | nonsynonymous | 1 | 0 |
| UNC80      | chr2 | 210786393/C//G  | nonsynonymous | 1 | 0 |
| UNC80      | chr2 | 210858989/G//T  | nonsynonymous | 1 | 0 |
| ERBB4      | chr2 | 212251773/C//T  | nonsynonymous | 1 | 0 |
| IKZF2      | chr2 | 213921652/C//T  | nonsynonymous | 1 | 0 |
| ATIC       | chr2 | 216209563/C//T  | nonsynonymous | 1 | 0 |
| RPL37A     | chr2 | 217363590/G//A  | synonymous    | 1 | 0 |
| CXCR1      | chr2 | 219029453/C//A  | nonsynonymous | 1 | 0 |
| CFAP65     | chr2 | 219888102/G//C  | nonsynonymous | 1 | 0 |
| DES        | chr2 | 220285065/A//G  | synonymous    | 1 | 0 |
| SPEG       | chr2 | 220348516/G//A  | nonsynonymous | 1 | 0 |
| OBSL1      | chr2 | 220423174/T//A  | synonymous    | 1 | 0 |
| SLC4A3     | chr2 | 220494890/G//T  | synonymous    | 1 | 0 |
| CCDC140    | chr2 | 223168989/C//T  | nonsynonymous | 1 | 0 |
| SCG2       | chr2 | 224462948/C//A  | synonymous    | 1 | 0 |
| DOCK10     | chr2 | 225652109/G//T  | synonymous    | 1 | 0 |
| IRS1       | chr2 | 227660616/C//G  | nonsynonymous | 1 | 0 |
| COL4A4     | chr2 | 227907880/C//G  | nonsynonymous | 1 | 0 |
| SPHKAP     | chr2 | 228855821/C//G  | nonsynonymous | 1 | 0 |
| ECEL1      | chr2 | 233349510/C//A  | nonsynonymous | 1 | 0 |
| NGEF       | chr2 | 233785032/G//T  | nonsynonymous | 1 | 0 |
| INPP5D     | chr2 | 233925260/G//T  | nonsynonymous | 1 | 0 |
| DGKD       | chr2 | 234350579/G//T  | nonsynonymous | 1 | 0 |
| UGT1A7     | chr2 | 234591296/C//G  | nonsynonymous | 1 | 0 |
| SH3BP4     | chr2 | 235950841/G//T  | synonymous    | 1 | 0 |
| COL6A3     | chr2 | 238233359/A//T  | synonymous    | 1 | 0 |
| COL6A3     | chr2 | 238249726/C//A  | synonymous    | 1 | 0 |
| COL6A3     | chr2 | 238253060/G//A  | nonsynonymous | 1 | 0 |
| COL6A3     | chr2 | 238280890/C//T  | nonsynonymous | 1 | 0 |
| LRRFIP1    | chr2 | 238671955/A//T  | synonymous    | 1 | 0 |
| PER2       | chr2 | 239161811/G//T  | nonsynonymous | 1 | 0 |
| RNPEPL1    | chr2 | 241517023/G//A  | nonsynonymous | 1 | 0 |
| SNED1      | chr2 | 242011244/G//C  | synonymous    | 1 | 0 |
| MTERF4     | chr2 | 242039282/G//A  | nonsynonymous | 1 | 0 |
| CHL1       | chr3 | 386326/G//T     | nonsynonymous | 1 | 0 |
| CNTN4      | chr3 | 3095505/G//A    | nonsynonymous | 1 | 0 |
| ITPR1      | chr3 | 4716792/A//G    | nonsynonymous | 1 | 0 |
| SSUH2      | chr3 | 8672503/C//G    | synonymous    | 1 | 0 |
| ATP2B2     | chr3 | 10491043/G//T   | nonsynonymous | 1 | 0 |
| SLC6A11    | chr3 | 10857933/G//C   | synonymous    | 1 | 0 |
| SLC6A11    | chr3 | 10861150/G//T   | nonsynonymous | 1 | 0 |
| TAMM41     | chr3 | 11885583/C//A   | nonsynonymous | 1 | 0 |
| CAND2      | chr3 | 12867122/G//T   | nonsynonymous | 1 | 0 |
| FGD5       | chr3 | 14860882/C//A   | nonsynonymous | 1 | 0 |
| FGD5       | chr3 | 14861255/C//G   | nonsynonymous | 1 | 0 |
| METTL6     | chr3 | 15466582/C//T   | synonymous    | 1 | 0 |
| COLQ       | chr3 | 15520491/C//A   | nonsynonymous | 1 | 0 |
|            | chr3 | 15643492/G//T   | synonymous    | 1 | 0 |

|             |      |                 |               |   |   |
|-------------|------|-----------------|---------------|---|---|
| DAZL        | chr3 | 16646786/C//A   | synonymous    | 1 | 0 |
| SUSD5       | chr3 | 33195325/C//A   | nonsynonymous | 1 | 0 |
| CLASP2      | chr3 | 33592748/C//T   | nonsynonymous | 1 | 0 |
| PDCD6IP     | chr3 | 33883490/G//T   | nonsynonymous | 1 | 0 |
| ACAA1       | chr3 | 38168047/C//A   | synonymous    | 1 | 0 |
| SCN10A      | chr3 | 38802813/G//T   | synonymous    | 1 | 0 |
| SCN11A      | chr3 | 38926791/ATC//A | nonsynonymous | 1 | 0 |
| MYRIP       | chr3 | 40085571/C//A   | synonymous    | 1 | 0 |
| ULK4        | chr3 | 41795921/T//A   | nonsynonymous | 1 | 0 |
| LRRC2       | chr3 | 46571471/C//A   | nonsynonymous | 1 | 0 |
| SMARCC1     | chr3 | 47702844/T//A   | nonsynonymous | 1 | 0 |
| CCDC51      | chr3 | 48475289/G//A   | synonymous    | 1 | 0 |
| COL7A1      | chr3 | 48615930/C//A   | nonsynonymous | 1 | 0 |
| RNF123      | chr3 | 49749985/C//A   | nonsynonymous | 1 | 0 |
| RAD54L2     | chr3 | 51624396/G//T   | synonymous    | 1 | 0 |
| GRM2        | chr3 | 51749607/C//G   | nonsynonymous | 1 | 0 |
| NEK4        | chr3 | 52802349/A//T   | synonymous    | 1 | 0 |
| ITIH1       | chr3 | 52824883/G//T   | nonsynonymous | 1 | 0 |
| ITIH1       | chr3 | 52825822/G//T   | nonsynonymous | 1 | 0 |
| MUSTN1      | chr3 | 52868957/T//A   | nonsynonymous | 1 | 0 |
| CACNA2D3    | chr3 | 54537635/C//A   | nonsynonymous | 1 | 0 |
| LRTM1       | chr3 | 54959232/G//A   | synonymous    | 1 | 0 |
| DNAH12      | chr3 | 57487094/A//G   | nonsynonymous | 1 | 0 |
| FLNB        | chr3 | 58134498/C//T   | nonsynonymous | 1 | 0 |
| DNASE1L3    | chr3 | 58186833/A//G   | nonsynonymous | 1 | 0 |
| CADPS       | chr3 | 62860600/G//A   | synonymous    | 1 | 0 |
| SLC25A26    | chr3 | 66271483/C//T   | synonymous    | 1 | 0 |
| TMF1        | chr3 | 69084199/C//G   | nonsynonymous | 1 | 0 |
| MITF        | chr3 | 70014224/A//G   | nonsynonymous | 1 | 0 |
| FRG2C       | chr3 | 75714737/G//T   | nonsynonymous | 1 | 0 |
| FRG2C       | chr3 | 75714921/A//T   | nonsynonymous | 1 | 0 |
| OR5H6       | chr3 | 97983911/C//A   | synonymous    | 1 | 0 |
| NIT2        | chr3 | 100057971/C//T  | synonymous    | 1 | 0 |
| IMPG2       | chr3 | 100951835/C//A  | nonsynonymous | 1 | 0 |
| ZPLD1       | chr3 | 102175170/G//T  | nonsynonymous | 1 | 0 |
| ALCAM       | chr3 | 105243264/T//C  | synonymous    | 1 | 0 |
| IFT57       | chr3 | 107910491/C//A  | nonsynonymous | 1 | 0 |
| KIAA1524    | chr3 | 108308120/C//A  | nonsynonymous | 1 | 0 |
| TAGLN3      | chr3 | 111732275/G//C  | synonymous    | 1 | 0 |
| GOLGB1      | chr3 | 121414978/C//A  | synonymous    | 1 | 0 |
| PARP14      | chr3 | 122420046/G//T  | nonsynonymous | 1 | 0 |
| CCDC14      | chr3 | 123680121/A//T  | nonsynonymous | 1 | 0 |
| ROPN1B      | chr3 | 125702118/C//A  | synonymous    | 1 | 0 |
| ZXDC        | chr3 | 126193978/C//A  | nonsynonymous | 1 | 0 |
| PLXNA1      | chr3 | 126737242/C//T  | synonymous    | 1 | 0 |
| COL6A5      | chr3 | 130110136/C//A  | nonsynonymous | 1 | 0 |
| SLCO2A1     | chr3 | 133672604/G//T  | synonymous    | 1 | 0 |
| IL20RB      | chr3 | 136701157/G//A  | nonsynonymous | 1 | 0 |
| DZIP1L      | chr3 | 137822709/C//A  | nonsynonymous | 1 | 0 |
| PIK3CB      | chr3 | 138384018/T//A  | synonymous    | 1 | 0 |
| PIK3CB      | chr3 | 138474626/C//T  | nonsynonymous | 1 | 0 |
| PRR23B      | chr3 | 138739506/C//T  | synonymous    | 1 | 0 |
| RBP1        | chr3 | 139258431/C//A  | nonsynonymous | 1 | 0 |
| CLSTN2      | chr3 | 140178590/C//A  | nonsynonymous | 1 | 0 |
| TRIM42      | chr3 | 140401930/C//T  | nonsynonymous | 1 | 0 |
| SPSB4       | chr3 | 140866094/T//C  | nonsynonymous | 1 | 0 |
| GRK7        | chr3 | 141499551/C//A  | nonsynonymous | 1 | 0 |
| XRN1        | chr3 | 142074287/C//A  | nonsynonymous | 1 | 0 |
| ZIC4        | chr3 | 147106540/G//T  | synonymous    | 1 | 0 |
| P2RY12      | chr3 | 151055703/T//A  | nonsynonymous | 1 | 0 |
| RAP2B       | chr3 | 152880959/G//T  | nonsynonymous | 1 | 0 |
| GPR149      | chr3 | 154145477/G//A  | synonymous    | 1 | 0 |
| PLCH1       | chr3 | 155212309/G//A  | synonymous    | 1 | 0 |
| PLCH1       | chr3 | 155232542/C//A  | synonymous    | 1 | 0 |
| IQCJ-SCHIP1 | chr3 | 159606728/A//G  | nonsynonymous | 1 | 0 |
| OTOL1       | chr3 | 161214841/C//A  | synonymous    | 1 | 0 |
| SI          | chr3 | 164714319/A//G  | synonymous    | 1 | 0 |
| SI          | chr3 | 164716422/A//C  | nonsynonymous | 1 | 0 |
| BCHE        | chr3 | 165548222/C//T  | synonymous    | 1 | 0 |
| GOLIM4      | chr3 | 167747760/T//C  | nonsynonymous | 1 | 0 |

|           |      |                |               |   |   |
|-----------|------|----------------|---------------|---|---|
| MECOM     | chr3 | 168807961/C//A | synonymous    | 1 | 0 |
| SLC7A14   | chr3 | 170218997/C//A | nonsynonymous | 1 | 0 |
| MCCC1     | chr3 | 182804545/G//A | nonsynonymous | 1 | 0 |
| LAMP3     | chr3 | 182872022/C//A | nonsynonymous | 1 | 0 |
| ABCC5     | chr3 | 183660561/C//A | synonymous    | 1 | 0 |
| DVL3      | chr3 | 183883999/G//C | nonsynonymous | 1 | 0 |
|           | chr3 | 183994326/G//C | synonymous    | 1 | 0 |
| ST6GAL1   | chr3 | 186790693/A//G | synonymous    | 1 | 0 |
| MB21D2    | chr3 | 192517385/A//C | nonsynonymous | 1 | 0 |
| ATP13A5   | chr3 | 193029694/G//A | nonsynonymous | 1 | 0 |
| HES1      | chr3 | 193854438/A//T | nonsynonymous | 1 | 0 |
| LRRC15    | chr3 | 194080213/G//T | synonymous    | 1 | 0 |
| SENP5     | chr3 | 196612853/G//T | nonsynonymous | 1 | 0 |
| MELTF     | chr3 | 196743106/G//T | synonymous    | 1 | 0 |
| NAT8L     | chr4 | 2065684/G//T   | nonsynonymous | 1 | 0 |
| CFAP99    | chr4 | 2453039/G//T   | nonsynonymous | 1 | 0 |
| FAM193A   | chr4 | 2691244/A//T   | synonymous    | 1 | 0 |
| NOP14     | chr4 | 2964897/G//A   | synonymous    | 1 | 0 |
| NOP14     | chr4 | 2965026/G//T   | synonymous    | 1 | 0 |
| NOP14     | chr4 | 2965132/C//T   | synonymous    | 1 | 0 |
| HGFAC     | chr4 | 3444590/C//T   | synonymous    | 1 | 0 |
| LRPAP1    | chr4 | 3534108/C//A   | nonsynonymous | 1 | 0 |
| MSX1      | chr4 | 4861766/A//T   | nonsynonymous | 1 | 0 |
| CRMP1     | chr4 | 5862929/C//A   | nonsynonymous | 1 | 0 |
| MAN2B2    | chr4 | 6599017/G//T   | nonsynonymous | 1 | 0 |
| BLOC1S4   | chr4 | 6717914/G//T   | synonymous    | 1 | 0 |
| ACOX3     | chr4 | 8394057/T//A   | synonymous    | 1 | 0 |
| SLC2A9    | chr4 | 9889266/C//A   | nonsynonymous | 1 | 0 |
| ZNF518B   | chr4 | 10446725/C//G  | nonsynonymous | 1 | 0 |
| CD38      | chr4 | 15826640/G//A  | nonsynonymous | 1 | 0 |
| PROM1     | chr4 | 15982144/C//A  | nonsynonymous | 1 | 0 |
| LDB2      | chr4 | 16504200/G//T  | synonymous    | 1 | 0 |
| QDPR      | chr4 | 17506086/C//A  | nonsynonymous | 1 | 0 |
| FAM184B   | chr4 | 17643820/G//T  | nonsynonymous | 1 | 0 |
| ADGRA3    | chr4 | 22390729/C//T  | nonsynonymous | 1 | 0 |
| PPARGC1A  | chr4 | 23831154/T//A  | nonsynonymous | 1 | 0 |
| SEL1L3    | chr4 | 25834710/A//G  | synonymous    | 1 | 0 |
| PCDH7     | chr4 | 30724855/G//T  | nonsynonymous | 1 | 0 |
| ARAP2     | chr4 | 36150059/C//T  | nonsynonymous | 1 | 0 |
| LIMCH1    | chr4 | 41621280/G//T  | nonsynonymous | 1 | 0 |
| YIPF7     | chr4 | 44626637/C//A  | nonsynonymous | 1 | 0 |
| GABRA4    | chr4 | 46930534/G//T  | nonsynonymous | 1 | 0 |
| GABRB1    | chr4 | 47322206/G//T  | nonsynonymous | 1 | 0 |
| KIT       | chr4 | 55592184/A//C  | nonsynonymous | 1 | 0 |
| SRD5A3    | chr4 | 56230328/G//C  | nonsynonymous | 1 | 0 |
| KIAA1211  | chr4 | 57180640/G//C  | nonsynonymous | 1 | 0 |
| KIAA1211  | chr4 | 57181920/T//C  | nonsynonymous | 1 | 0 |
| THEGL     | chr4 | 57462760/G//T  | nonsynonymous | 1 | 0 |
| NOA1      | chr4 | 57843708/A//C  | nonsynonymous | 1 | 0 |
| ADGRL3    | chr4 | 62812631/G//T  | nonsynonymous | 1 | 0 |
| ADGRL3    | chr4 | 62936098/C//A  | synonymous    | 1 | 0 |
| ADGRL3    | chr4 | 62936494/C//G  | nonsynonymous | 1 | 0 |
| EPHA5     | chr4 | 66217196/A//T  | nonsynonymous | 1 | 0 |
| TMPRSS11B | chr4 | 69097015/A//G  | nonsynonymous | 1 | 0 |
| UGT2A2    | chr4 | 70465048/C//A  | nonsynonymous | 1 | 0 |
| UGT2A2    | chr4 | 70505209/T//A  | nonsynonymous | 1 | 0 |
| CABS1     | chr4 | 71201849/G//T  | nonsynonymous | 1 | 0 |
| SMR3A     | chr4 | 71232454/G//T  | nonsynonymous | 1 | 0 |
| AMTN      | chr4 | 71389580/T//G  | synonymous    | 1 | 0 |
| SLC4A4    | chr4 | 72363337/C//A  | synonymous    | 1 | 0 |
| ANKRD17   | chr4 | 74021406/G//C  | synonymous    | 1 | 0 |
| AFM       | chr4 | 74363415/A//C  | nonsynonymous | 1 | 0 |
| CXCL6     | chr4 | 74703392/C//A  | synonymous    | 1 | 0 |
| FRAS1     | chr4 | 79188412/G//T  | synonymous    | 1 | 0 |
| FRAS1     | chr4 | 79188517/G//A  | synonymous    | 1 | 0 |
| PRKG2     | chr4 | 82095997/C//G  | nonsynonymous | 1 | 0 |
| HELQ      | chr4 | 84358040/T//A  | synonymous    | 1 | 0 |
| HELQ      | chr4 | 84362564/T//A  | synonymous    | 1 | 0 |
| GPAT3     | chr4 | 84519220/G//C  | nonsynonymous | 1 | 0 |
| WDFY3     | chr4 | 85638147/T//A  | nonsynonymous | 1 | 0 |

|          |      |                 |               |   |   |
|----------|------|-----------------|---------------|---|---|
| IBSP     | chr4 | 88732694/G//T   | nonsynonymous | 1 | 0 |
| HERC3    | chr4 | 89583578/C//A   | synonymous    | 1 | 0 |
| MMRN1    | chr4 | 90816122/G//T   | synonymous    | 1 | 0 |
| SMARCAD1 | chr4 | 95147344/A//G   | nonsynonymous | 1 | 0 |
| BMPR1B   | chr4 | 96046230/G//A   | synonymous    | 1 | 0 |
| PDHA2    | chr4 | 96762261/T//C   | synonymous    | 1 | 0 |
| STPG2    | chr4 | 98480246/C//A   | nonsynonymous | 1 | 0 |
| NFKB1    | chr4 | 103516131/G//A  | nonsynonymous | 1 | 0 |
| CISD2    | chr4 | 103806475/G//T  | nonsynonymous | 1 | 0 |
| TET2     | chr4 | 106157540/G//T  | nonsynonymous | 1 | 0 |
| TBCK     | chr4 | 107163632/T//G  | synonymous    | 1 | 0 |
| TBCK     | chr4 | 107168385/G//A  | nonsynonymous | 1 | 0 |
| ETNPPL   | chr4 | 109681429/G//T  | synonymous    | 1 | 0 |
| COL25A1  | chr4 | 109769914/C//A  | nonsynonymous | 1 | 0 |
| COL25A1  | chr4 | 110223055/G//A  | synonymous    | 1 | 0 |
| MCUB     | chr4 | 110481584/C//G  | nonsynonymous | 1 | 0 |
| ENPEP    | chr4 | 111398017/G//T  | nonsynonymous | 1 | 0 |
| ZGRF1    | chr4 | 113540220/C//T  | synonymous    | 1 | 0 |
| ANK2     | chr4 | 114170946/T//A  | synonymous    | 1 | 0 |
| NDST3    | chr4 | 118975429/G//C  | nonsynonymous | 1 | 0 |
| PDE5A    | chr4 | 120527900/C//A  | synonymous    | 1 | 0 |
| TRPC3    | chr4 | 122833121/A//T  | nonsynonymous | 1 | 0 |
| KIAA1109 | chr4 | 123141564/G//C  | nonsynonymous | 1 | 0 |
| KIAA1109 | chr4 | 123268856/G//T  | nonsynonymous | 1 | 0 |
| KIAA1109 | chr4 | 123274294/G//C  | nonsynonymous | 1 | 0 |
| FAT4     | chr4 | 126242219/G//T  | nonsynonymous | 1 | 0 |
| MGARP    | chr4 | 140188176/C//A  | synonymous    | 1 | 0 |
| MAML3    | chr4 | 140811710/T//A  | nonsynonymous | 1 | 0 |
| MAML3    | chr4 | 140812033/G//C  | nonsynonymous | 1 | 0 |
| TBC1D9   | chr4 | 141543364/C//A  | synonymous    | 1 | 0 |
| OTUD4    | chr4 | 146064557/G//C  | nonsynonymous | 1 | 0 |
| PRMT9    | chr4 | 148575024/A//G  | nonsynonymous | 1 | 0 |
| DCLK2    | chr4 | 151142877/A//G  | nonsynonymous | 1 | 0 |
| SH3D19   | chr4 | 152060987/C//A  | nonsynonymous | 1 | 0 |
| FGA      | chr4 | 155505917/C//G  | nonsynonymous | 1 | 0 |
| NPY1R    | chr4 | 164247228/G//A  | nonsynonymous | 1 | 0 |
| NPY5R    | chr4 | 164272571/G//A  | nonsynonymous | 1 | 0 |
| TLL1     | chr4 | 166946488/G//T  | nonsynonymous | 1 | 0 |
| ANXA10   | chr4 | 169060729/C//T  | nonsynonymous | 1 | 0 |
| AADAT    | chr4 | 170990363/G//A  | nonsynonymous | 1 | 0 |
| GALNTL6  | chr4 | 173734773/A//T  | nonsynonymous | 1 | 0 |
| WDR17    | chr4 | 177082105/C//T  | nonsynonymous | 1 | 0 |
| AGA      | chr4 | 178358661/CT//C | nonsynonymous | 1 | 0 |
| CDKN2AIP | chr4 | 184368109/C//G  | nonsynonymous | 1 | 0 |
| FAM149A  | chr4 | 187088167/G//A  | nonsynonymous | 1 | 0 |
| CLPTM1L  | chr5 | 1341794/C//G    | nonsynonymous | 1 | 0 |
| IRX1     | chr5 | 3600239/G//C    | nonsynonymous | 1 | 0 |
| ADAMTS16 | chr5 | 5235135/A//T    | nonsynonymous | 1 | 0 |
| PAPD7    | chr5 | 6743862/A//C    | nonsynonymous | 1 | 0 |
| PAPD7    | chr5 | 6751220/C//T    | synonymous    | 1 | 0 |
| SEMA5A   | chr5 | 9066693/C//G    | nonsynonymous | 1 | 0 |
| CTNND2   | chr5 | 11117671/C//A   | nonsynonymous | 1 | 0 |
| CTNND2   | chr5 | 11159846/G//A   | synonymous    | 1 | 0 |
| DNAH5    | chr5 | 13824368/T//A   | synonymous    | 1 | 0 |
| MARCH11  | chr5 | 16067696/G//T   | nonsynonymous | 1 | 0 |
| MARCH11  | chr5 | 16091060/C//T   | nonsynonymous | 1 | 0 |
| PRDM9    | chr5 | 23509092/C//A   | synonymous    | 1 | 0 |
| PRDM9    | chr5 | 23526554/G//T   | nonsynonymous | 1 | 0 |
| PRDM9    | chr5 | 23526896/C//A   | nonsynonymous | 1 | 0 |
| CDH9     | chr5 | 26915837/C//A   | nonsynonymous | 1 | 0 |
| CDH6     | chr5 | 31297434/G//T   | nonsynonymous | 1 | 0 |
| DROSHA   | chr5 | 31401560/C//G   | nonsynonymous | 1 | 0 |
| RXFP3    | chr5 | 33936787/G//T   | synonymous    | 1 | 0 |
| RAD1     | chr5 | 34914869/G//C   | nonsynonymous | 1 | 0 |
| DNAJC21  | chr5 | 34945907/A//T   | nonsynonymous | 1 | 0 |
| SPEF2    | chr5 | 35709106/G//T   | nonsynonymous | 1 | 0 |
| SLC1A3   | chr5 | 36671224/G//C   | nonsynonymous | 1 | 0 |
| NIPBL    | chr5 | 37022379/A//T   | nonsynonymous | 1 | 0 |
| C5orf42  | chr5 | 37247790/C//A   | nonsynonymous | 1 | 0 |
| NUP155   | chr5 | 37304912/T//G   | nonsynonymous | 1 | 0 |

|          |      |                |               |   |   |
|----------|------|----------------|---------------|---|---|
| NUP155   | chr5 | 37327790/T//C  | synonymous    | 1 | 0 |
| EGFLAM   | chr5 | 38338839/G//C  | nonsynonymous | 1 | 0 |
| EGFLAM   | chr5 | 38448399/C//A  | synonymous    | 1 | 0 |
| OSMR     | chr5 | 38904576/G//A  | nonsynonymous | 1 | 0 |
| C9       | chr5 | 39331843/C//T  | nonsynonymous | 1 | 0 |
| CARD6    | chr5 | 40853115/G//T  | nonsynonymous | 1 | 0 |
| C7       | chr5 | 40934560/G//T  | nonsynonymous | 1 | 0 |
| C7       | chr5 | 40964879/G//A  | nonsynonymous | 1 | 0 |
| MROH2B   | chr5 | 40998268/G//T  | synonymous    | 1 | 0 |
| C6       | chr5 | 41149449/G//T  | nonsynonymous | 1 | 0 |
| HMGCS1   | chr5 | 43298858/C//A  | nonsynonymous | 1 | 0 |
| NNT      | chr5 | 43644761/C//G  | nonsynonymous | 1 | 0 |
| GZMK     | chr5 | 54329652/T//A  | synonymous    | 1 | 0 |
| ANKRD55  | chr5 | 55528683/C//A  | nonsynonymous | 1 | 0 |
| MAP3K1   | chr5 | 56160642/C//T  | nonsynonymous | 1 | 0 |
| GPBP1    | chr5 | 56527134/G//C  | nonsynonymous | 1 | 0 |
| PLK2     | chr5 | 57755534/C//A  | nonsynonymous | 1 | 0 |
| MCCC2    | chr5 | 70900260/A//T  | nonsynonymous | 1 | 0 |
| ARHGEF28 | chr5 | 73069798/G//T  | nonsynonymous | 1 | 0 |
| SV2C     | chr5 | 75427838/T//A  | nonsynonymous | 1 | 0 |
| IQGAP2   | chr5 | 75950794/A//T  | nonsynonymous | 1 | 0 |
| BHMT     | chr5 | 78423613/C//T  | nonsynonymous | 1 | 0 |
| CMYA5    | chr5 | 79033166/G//T  | nonsynonymous | 1 | 0 |
| VCAN     | chr5 | 82833527/A//G  | nonsynonymous | 1 | 0 |
| GPR150   | chr5 | 94956899/G//A  | nonsynonymous | 1 | 0 |
| PCSK1    | chr5 | 95733161/A//C  | nonsynonymous | 1 | 0 |
| MAN2A1   | chr5 | 109110505/G//C | nonsynonymous | 1 | 0 |
| APC      | chr5 | 112102927/C//G | nonsynonymous | 1 | 0 |
| ZNF474   | chr5 | 121488730/C//G | nonsynonymous | 1 | 0 |
| SNCAIP   | chr5 | 121787263/T//A | synonymous    | 1 | 0 |
| SLC12A2  | chr5 | 127420410/C//T | synonymous    | 1 | 0 |
| FBN2     | chr5 | 127700419/C//A | nonsynonymous | 1 | 0 |
| ADAMTS19 | chr5 | 129039964/T//C | synonymous    | 1 | 0 |
| CHSY3    | chr5 | 129240891/G//A | synonymous    | 1 | 0 |
| RAPGEF6  | chr5 | 130764603/T//A | nonsynonymous | 1 | 0 |
| PDLIM4   | chr5 | 131607985/C//T | synonymous    | 1 | 0 |
| TXNDC15  | chr5 | 134235171/T//C | synonymous    | 1 | 0 |
| BRD8     | chr5 | 137476493/C//A | synonymous    | 1 | 0 |
| KDM3B    | chr5 | 137766067/C//T | nonsynonymous | 1 | 0 |
| NDUFA2   | chr5 | 140027251/C//G | synonymous    | 1 | 0 |
| DND1     | chr5 | 140050979/T//A | nonsynonymous | 1 | 0 |
| PCDHA2   | chr5 | 140176844/C//A | synonymous    | 1 | 0 |
| PCDHA4   | chr5 | 140187786/G//A | synonymous    | 1 | 0 |
| PCDHA5   | chr5 | 140201567/C//A | synonymous    | 1 | 0 |
| PCDHA6   | chr5 | 140208077/C//T | nonsynonymous | 1 | 0 |
| PCDHA7   | chr5 | 140214372/C//T | nonsynonymous | 1 | 0 |
| PCDHA8   | chr5 | 140222981/C//T | nonsynonymous | 1 | 0 |
| PCDHA13  | chr5 | 140262032/T//G | nonsynonymous | 1 | 0 |
| PCDHAC1  | chr5 | 140306672/C//A | nonsynonymous | 1 | 0 |
| PCDHB15  | chr5 | 140626811/C//A | nonsynonymous | 1 | 0 |
| PCDHGA1  | chr5 | 140710805/G//T | nonsynonymous | 1 | 0 |
| PCDHGA1  | chr5 | 140710996/A//G | nonsynonymous | 1 | 0 |
| PCDHGB1  | chr5 | 140731562/G//T | nonsynonymous | 1 | 0 |
| PCDHGA5  | chr5 | 140744459/G//T | nonsynonymous | 1 | 0 |
| PCDHGA8  | chr5 | 140773615/G//T | nonsynonymous | 1 | 0 |
| PCDHGB6  | chr5 | 140789004/G//T | nonsynonymous | 1 | 0 |
| PCDHGB7  | chr5 | 140797347/G//T | synonymous    | 1 | 0 |
| POU4F3   | chr5 | 145719603/C//G | nonsynonymous | 1 | 0 |
| SYNPO    | chr5 | 150028545/C//T | synonymous    | 1 | 0 |
| FAT2     | chr5 | 150947928/T//C | nonsynonymous | 1 | 0 |
| HAND1    | chr5 | 153855442/A//T | nonsynonymous | 1 | 0 |
| KIF4B    | chr5 | 154396951/G//T | nonsynonymous | 1 | 0 |
| ITK      | chr5 | 156608093/A//G | synonymous    | 1 | 0 |
| C5orf52  | chr5 | 157098770/G//T | nonsynonymous | 1 | 0 |
| EBF1     | chr5 | 158526457/C//T | synonymous    | 1 | 0 |
| ADRA1B   | chr5 | 159399272/G//A | nonsynonymous | 1 | 0 |
| GABRG2   | chr5 | 161569217/G//T | nonsynonymous | 1 | 0 |
| GABRG2   | chr5 | 161576293/G//T | nonsynonymous | 1 | 0 |
| WWC1     | chr5 | 167882503/C//G | nonsynonymous | 1 | 0 |
| SLIT3    | chr5 | 168093559/C//A | nonsynonymous | 1 | 0 |

|              |      |                  |               |   |   |
|--------------|------|------------------|---------------|---|---|
| SPDL1        | chr5 | 169015475/G//C   | nonsynonymous | 1 | 0 |
| FAM196B      | chr5 | 169310379/G//T   | nonsynonymous | 1 | 0 |
| DOCK2        | chr5 | 169446112/G//T   | nonsynonymous | 1 | 0 |
| TLX3         | chr5 | 170736411/G//T   | nonsynonymous | 1 | 0 |
| STK10        | chr5 | 171520813/C//A   | nonsynonymous | 1 | 0 |
| BOD1         | chr5 | 173040178/C//A   | nonsynonymous | 1 | 0 |
| HRH2         | chr5 | 175110360/G//A   | nonsynonymous | 1 | 0 |
| HRH2         | chr5 | 175110583/G//T   | nonsynonymous | 1 | 0 |
| UNC5A        | chr5 | 176305314/G//A   | nonsynonymous | 1 | 0 |
| HK3          | chr5 | 176310839/T//C   | nonsynonymous | 1 | 0 |
| TBC1D9B      | chr5 | 179290699/C//T   | nonsynonymous | 1 | 0 |
| RASGEF1C     | chr5 | 179545653/C//A   | nonsynonymous | 1 | 0 |
| CNOT6        | chr5 | 179991699/G//T   | nonsynonymous | 1 | 0 |
| BTNL3        | chr5 | 180432593/C//T   | synonymous    | 1 | 0 |
| TRIM7        | chr5 | 180622424/G//A   | synonymous    | 1 | 0 |
| NQO2         | chr6 | 3017147/G//T     | synonymous    | 1 | 0 |
| SLC22A23     | chr6 | 3273493/GGGCA//G | nonsynonymous | 1 | 0 |
| RREB1        | chr6 | 7231982/G//T     | nonsynonymous | 1 | 0 |
| DSP          | chr6 | 7581097/G//T     | synonymous    | 1 | 0 |
| SNRNP48      | chr6 | 7590627/G//A     | nonsynonymous | 1 | 0 |
| ERVFRD-1     | chr6 | 11104735/G//T    | nonsynonymous | 1 | 0 |
| HIVEP1       | chr6 | 12162090/G//T    | nonsynonymous | 1 | 0 |
| RBM24        | chr6 | 17291999/C//A    | nonsynonymous | 1 | 0 |
| CAP2         | chr6 | 17421836/G//A    | nonsynonymous | 1 | 0 |
| NRSN1        | chr6 | 24145944/G//T    | nonsynonymous | 1 | 0 |
| HIST1H1C     | chr6 | 26056277/T//A    | nonsynonymous | 1 | 0 |
| HIST1H2AE    | chr6 | 26217264/G//T    | nonsynonymous | 1 | 0 |
| BTN3A1       | chr6 | 26408051/G//A    | nonsynonymous | 1 | 0 |
| BTN3A1       | chr6 | 26408148/G//T    | nonsynonymous | 1 | 0 |
| BTN1A1       | chr6 | 26509263/G//C    | nonsynonymous | 1 | 0 |
| BTN1A1       | chr6 | 26509383/C//A    | nonsynonymous | 1 | 0 |
| HIST1H2AH    | chr6 | 27115117/G//T    | synonymous    | 1 | 0 |
| PRSS16       | chr6 | 27215574/C//T    | nonsynonymous | 1 | 0 |
| POM121L2     | chr6 | 27279105/G//A    | nonsynonymous | 1 | 0 |
| HIST1H1B     | chr6 | 27834960/G//A    | synonymous    | 1 | 0 |
| ZSCAN9       | chr6 | 28194918/G//T    | nonsynonymous | 1 | 0 |
| ZSCAN9       | chr6 | 28200828/C//G    | nonsynonymous | 1 | 0 |
|              | chr6 | 28226980/C//A    | synonymous    | 1 | 0 |
| ZSCAN26      | chr6 | 28244062/T//G    | nonsynonymous | 1 | 0 |
| ZBED9        | chr6 | 28543639/T//A    | synonymous    | 1 | 0 |
| LOC100129636 | chr6 | 29044139/C//T    | synonymous    | 1 | 0 |
| LOC100129636 | chr6 | 29044433/G//T    | synonymous    | 1 | 0 |
| OR14J1       | chr6 | 29275288/A//T    | synonymous    | 1 | 0 |
| OR12D2       | chr6 | 29364752/C//A    | nonsynonymous | 1 | 0 |
| OR10C1       | chr6 | 29407933/G//T    | synonymous    | 1 | 0 |
| MAS1L        | chr6 | 29455386/C//A    | nonsynonymous | 1 | 0 |
| ZFP57        | chr6 | 29640630/A//G    | nonsynonymous | 1 | 0 |
| TRIM10       | chr6 | 30122144/G//T    | synonymous    | 1 | 0 |
| TRIM15       | chr6 | 30139725/G//T    | nonsynonymous | 1 | 0 |
| TRIM39-RPP21 | chr6 | 30314583/A//T    | nonsynonymous | 1 | 0 |
| ABCF1        | chr6 | 30550284/G//T    | nonsynonymous | 1 | 0 |
| ABCF1        | chr6 | 30553948/A//G    | nonsynonymous | 1 | 0 |
| FLOT1        | chr6 | 30707967/G//A    | nonsynonymous | 1 | 0 |
| CDSN         | chr6 | 31084463/C//T    | nonsynonymous | 1 | 0 |
| VARS         | chr6 | 31747511/G//A    | synonymous    | 1 | 0 |
| SLC44A4      | chr6 | 31839177/G//A    | synonymous    | 1 | 0 |
| TNXB         | chr6 | 32032716/C//A    | synonymous    | 1 | 0 |
| NOTCH4       | chr6 | 32180374/A//G    | nonsynonymous | 1 | 0 |
| COL11A2      | chr6 | 33139278/C//A    | nonsynonymous | 1 | 0 |
| ITPR3        | chr6 | 33648145/G//T    | nonsynonymous | 1 | 0 |
| LEMD2        | chr6 | 33756773/C//T    | nonsynonymous | 1 | 0 |
| PACSL1       | chr6 | 34497479/G//T    | nonsynonymous | 1 | 0 |
| ANKS1A       | chr6 | 35021901/G//T    | nonsynonymous | 1 | 0 |
| CLPSL1       | chr6 | 35755752/G//A    | nonsynonymous | 1 | 0 |
| SLC26A8      | chr6 | 35911776/G//T    | synonymous    | 1 | 0 |
| PNPLA1       | chr6 | 36259132/G//C    | nonsynonymous | 1 | 0 |
| ZFAND3       | chr6 | 38120201/G//T    | synonymous    | 1 | 0 |
| DNAH8        | chr6 | 38810206/G//A    | nonsynonymous | 1 | 0 |
| MOCS1        | chr6 | 39880004/T//A    | synonymous    | 1 | 0 |
| TTBK1        | chr6 | 43220605/C//A    | synonymous    | 1 | 0 |



|          |      |                    |               |   |   |
|----------|------|--------------------|---------------|---|---|
| TMEM151B | chr6 | 44240868/G//T      | synonymous    | 1 | 0 |
| AARS2    | chr6 | 44272471/A//T      | nonsynonymous | 1 | 0 |
| RUNX2    | chr6 | 45399717/A//G      | nonsynonymous | 1 | 0 |
| MEP1A    | chr6 | 46800925/A//T      | nonsynonymous | 1 | 0 |
| ADGRF1   | chr6 | 46996788/C//A      | nonsynonymous | 1 | 0 |
| PTCHD4   | chr6 | 47846790/G//T      | nonsynonymous | 1 | 0 |
| RHAG     | chr6 | 49573464/G//A      | synonymous    | 1 | 0 |
| GSTA5    | chr6 | 52696736/C//A      | synonymous    | 1 | 0 |
| ICK      | chr6 | 52881027/G//A      | nonsynonymous | 1 | 0 |
| MLIP     | chr6 | 54095667/T//C      | synonymous    | 1 | 0 |
| HMGCLL1  | chr6 | 55406886/C//T      | nonsynonymous | 1 | 0 |
| DST      | chr6 | 56504516/T//C      | nonsynonymous | 1 | 0 |
| PHF3     | chr6 | 64422853/G//T      | nonsynonymous | 1 | 0 |
| EYS      | chr6 | 66044999/C//A      | nonsynonymous | 1 | 0 |
| ADGRB3   | chr6 | 70049285/G//C      | synonymous    | 1 | 0 |
| COL9A1   | chr6 | 70964213/C//A      | nonsynonymous | 1 | 0 |
| MTO1     | chr6 | 74171719/G//T      | nonsynonymous | 1 | 0 |
| MTO1     | chr6 | 74175987/G//C      | nonsynonymous | 1 | 0 |
| EEF1A1   | chr6 | 74227593/C//T      | synonymous    | 1 | 0 |
| TTK      | chr6 | 80721642/A//T      | nonsynonymous | 1 | 0 |
| PRSS35   | chr6 | 84233758/C//G      | nonsynonymous | 1 | 0 |
| SRSF12   | chr6 | 89814919/G//C      | nonsynonymous | 1 | 0 |
| MDN1     | chr6 | 90459089/C//G      | nonsynonymous | 1 | 0 |
| GJA10    | chr6 | 90605139/G//A      | nonsynonymous | 1 | 0 |
| EPHA7    | chr6 | 93979309/G//T      | nonsynonymous | 1 | 0 |
| FUT9     | chr6 | 96651112/C//A      | synonymous    | 1 | 0 |
| KLHL32   | chr6 | 97562198/G//T      | nonsynonymous | 1 | 0 |
| FBXL4    | chr6 | 99347359/T//A      | nonsynonymous | 1 | 0 |
| SIM1     | chr6 | 100841670/G//T     | nonsynonymous | 1 | 0 |
| SIM1     | chr6 | 100896056/G//T     | nonsynonymous | 1 | 0 |
| SIM1     | chr6 | 100911207/C//T     | synonymous    | 1 | 0 |
| PRDM1    | chr6 | 106552902/C//A     | synonymous    | 1 | 0 |
| PRDM1    | chr6 | 106553096/G//A     | nonsynonymous | 1 | 0 |
| AIM1     | chr6 | 106968452/G//A     | nonsynonymous | 1 | 0 |
| AIM1     | chr6 | 106991426/C//T     | nonsynonymous | 1 | 0 |
| NR2E1    | chr6 | 108497817/G//T     | nonsynonymous | 1 | 0 |
| ZBTB24   | chr6 | 109802806/T//A     | nonsynonymous | 1 | 0 |
| CDC40    | chr6 | 110547371/G//C     | nonsynonymous | 1 | 0 |
| TUBE1    | chr6 | 112408680/G//T     | synonymous    | 1 | 0 |
| RFPL4B   | chr6 | 112671411/T//A     | synonymous    | 1 | 0 |
| FAM26F   | chr6 | 116784652/G//T     | synonymous    | 1 | 0 |
| FAM26E   | chr6 | 116836823/G//T     | nonsynonymous | 1 | 0 |
| SLC35F1  | chr6 | 118606414/G//T     | nonsynonymous | 1 | 0 |
| SLC35F1  | chr6 | 118635279/C//A     | nonsynonymous | 1 | 0 |
| CEP85L   | chr6 | 118786709/C//A     | nonsynonymous | 1 | 0 |
| NKAIN2   | chr6 | 124604242/T//C     | nonsynonymous | 1 | 0 |
| THEMIS   | chr6 | 128150620/C//A     | nonsynonymous | 1 | 0 |
| L3MBTL3  | chr6 | 130370512/C//T     | nonsynonymous | 1 | 0 |
| ENPP1    | chr6 | 132181576/C//A     | nonsynonymous | 1 | 0 |
| STX7     | chr6 | 132781897/T//G     | nonsynonymous | 1 | 0 |
| TAAR9    | chr6 | 132859515/A//T     | synonymous    | 1 | 0 |
| TAAR1    | chr6 | 132966777/G//T     | nonsynonymous | 1 | 0 |
| VNN1     | chr6 | 133013437/C//T     | synonymous    | 1 | 0 |
| PDE7B    | chr6 | 136512962/A//C     | nonsynonymous | 1 | 0 |
| IL20RA   | chr6 | 137329835/C//A     | nonsynonymous | 1 | 0 |
| ARFGEF3  | chr6 | 138599586/A//T     | nonsynonymous | 1 | 0 |
| TXLNB    | chr6 | 139609618/C//A     | nonsynonymous | 1 | 0 |
| ADGRG6   | chr6 | 142688780/G//T     | nonsynonymous | 1 | 0 |
| GRM1     | chr6 | 146351211/A//T     | synonymous    | 1 | 0 |
| ADGB     | chr6 | 147109625/G//T     | nonsynonymous | 1 | 0 |
| ZC3H12D  | chr6 | 149771994/G//A     | nonsynonymous | 1 | 0 |
| ULBP1    | chr6 | 150289960/T//A     | synonymous    | 1 | 0 |
| ULBP3    | chr6 | 150390199/C//G     | nonsynonymous | 1 | 0 |
| AKAP12   | chr6 | 151671402/C//A     | nonsynonymous | 1 | 0 |
| RMND1    | chr6 | 151766935/T//A     | synonymous    | 1 | 0 |
| CCDC170  | chr6 | 151917613/C//A     | nonsynonymous | 1 | 0 |
| SCAF8    | chr6 | 155153496/C//T     | nonsynonymous | 1 | 0 |
| SCAF8    | chr6 | 155153581/G//C     | synonymous    | 1 | 0 |
| TIAM2    | chr6 | 155450542/G//A     | nonsynonymous | 1 | 0 |
| TMEM181  | chr6 | 159005074/AAGGT//A | nonsynonymous | 1 | 0 |

|           |      |                 |               |   |   |
|-----------|------|-----------------|---------------|---|---|
| PNLDC1    | chr6 | 160241533/G//T  | nonsynonymous | 1 | 0 |
| LPA       | chr6 | 160966532/G//T  | nonsynonymous | 1 | 0 |
| PLG       | chr6 | 161155115/A//C  | nonsynonymous | 1 | 0 |
| PARK2     | chr6 | 161970011/C//CA | nonsynonymous | 1 | 0 |
| C6orf118  | chr6 | 165715186/C//T  | nonsynonymous | 1 | 0 |
| T         | chr6 | 166575993/C//A  | synonymous    | 1 | 0 |
| GPR31     | chr6 | 167570464/T//A  | nonsynonymous | 1 | 0 |
| GPR31     | chr6 | 167570606/G//T  | nonsynonymous | 1 | 0 |
| THBS2     | chr6 | 169648544/C//A  | nonsynonymous | 1 | 0 |
| WDR27     | chr6 | 170072470/T//C  | nonsynonymous | 1 | 0 |
| TCTE3     | chr6 | 170144201/GC//G | nonsynonymous | 1 | 0 |
| MICALL2   | chr7 | 1479575/C//A    | nonsynonymous | 1 | 0 |
| INTS1     | chr7 | 1510208/C//A    | synonymous    | 1 | 0 |
| SNX8      | chr7 | 2296556/G//A    | nonsynonymous | 1 | 0 |
| IQCE      | chr7 | 2623287/A//G    | nonsynonymous | 1 | 0 |
| FOXK1     | chr7 | 4794096/C//T    | synonymous    | 1 | 0 |
| RADIL     | chr7 | 4838973/G//T    | synonymous    | 1 | 0 |
| RADIL     | chr7 | 4855873/T//A    | nonsynonymous | 1 | 0 |
| PAPOLB    | chr7 | 4899648/G//T    | synonymous    | 1 | 0 |
| RBAK      | chr7 | 5105367/C//T    | synonymous    | 1 | 0 |
| TNRC18    | chr7 | 5401331/T//C    | nonsynonymous | 1 | 0 |
| ICA1      | chr7 | 8268273/C//A    | nonsynonymous | 1 | 0 |
| MEOX2     | chr7 | 15725605/C//A   | synonymous    | 1 | 0 |
| ISPD      | chr7 | 16348239/T//A   | nonsynonymous | 1 | 0 |
| SOSTDC1   | chr7 | 16502118/A//T   | synonymous    | 1 | 0 |
| PRPS1L1   | chr7 | 18066687/C//A   | nonsynonymous | 1 | 0 |
| HDAC9     | chr7 | 18868781/C//A   | synonymous    | 1 | 0 |
| ITGB8     | chr7 | 20418799/G//C   | nonsynonymous | 1 | 0 |
| DNAH11    | chr7 | 21640292/A//T   | nonsynonymous | 1 | 0 |
| GPNUMB    | chr7 | 23309689/G//A   | nonsynonymous | 1 | 0 |
| IGF2BP3   | chr7 | 23383417/C//A   | nonsynonymous | 1 | 0 |
| FAM221A   | chr7 | 23731030/A//T   | nonsynonymous | 1 | 0 |
| CYCS      | chr7 | 25163650/C//A   | nonsynonymous | 1 | 0 |
| C7orf31   | chr7 | 25218904/G//C   | synonymous    | 1 | 0 |
| HOXA10    | chr7 | 27211464/G//C   | synonymous    | 1 | 0 |
| NOD1      | chr7 | 30492618/G//C   | nonsynonymous | 1 | 0 |
| ADCYAP1R1 | chr7 | 31117664/G//T   | nonsynonymous | 1 | 0 |
| ANLN      | chr7 | 36450717/A//T   | nonsynonymous | 1 | 0 |
| GPR141    | chr7 | 37780193/G//A   | synonymous    | 1 | 0 |
| NME8      | chr7 | 37916535/T//A   | nonsynonymous | 1 | 0 |
| NME8      | chr7 | 37928024/C//A   | nonsynonymous | 1 | 0 |
| SFRP4     | chr7 | 37953976/G//T   | synonymous    | 1 | 0 |
| INHBA     | chr7 | 41729343/G//A   | synonymous    | 1 | 0 |
| GLI3      | chr7 | 42005514/C//A   | nonsynonymous | 1 | 0 |
| GLI3      | chr7 | 42012010/G//T   | nonsynonymous | 1 | 0 |
| STK17A    | chr7 | 43659224/C//G   | nonsynonymous | 1 | 0 |
| TNS3      | chr7 | 47384411/C//T   | synonymous    | 1 | 0 |
| C7orf57   | chr7 | 48092436/C//G   | nonsynonymous | 1 | 0 |
| ABCA13    | chr7 | 48314375/A//T   | nonsynonymous | 1 | 0 |
| DDC       | chr7 | 50531049/C//A   | nonsynonymous | 1 | 0 |
| VSTM2A    | chr7 | 54612470/G//A   | nonsynonymous | 1 | 0 |
| ZNF727    | chr7 | 63538262/A//T   | nonsynonymous | 1 | 0 |
| ZNF735    | chr7 | 63667597/G//T   | nonsynonymous | 1 | 0 |
| ZNF735    | chr7 | 63667605/G//A   | nonsynonymous | 1 | 0 |
| ZNF117    | chr7 | 64439078/T//C   | nonsynonymous | 1 | 0 |
|           | chr7 | 71868383/G//C   | synonymous    | 1 | 0 |
| ABHD11    | chr7 | 73151550/C//A   | nonsynonymous | 1 | 0 |
| ELN       | chr7 | 73477523/C//A   | synonymous    | 1 | 0 |
| HIP1      | chr7 | 75172244/G//A   | nonsynonymous | 1 | 0 |
| YWHAG     | chr7 | 75958818/C//T   | synonymous    | 1 | 0 |
| MAGI2     | chr7 | 77814994/G//T   | synonymous    | 1 | 0 |
| MAGI2     | chr7 | 77885262/C//A   | nonsynonymous | 1 | 0 |
| PCLO      | chr7 | 82544135/C//A   | nonsynonymous | 1 | 0 |
| PCLO      | chr7 | 82581187/C//A   | nonsynonymous | 1 | 0 |
| SEMA3A    | chr7 | 83590806/G//T   | nonsynonymous | 1 | 0 |
| ABCB4     | chr7 | 87082305/C//A   | nonsynonymous | 1 | 0 |
| ABCB1     | chr7 | 87170710/G//T   | nonsynonymous | 1 | 0 |
| C7orf62   | chr7 | 88423478/C//A   | synonymous    | 1 | 0 |
| COL1A2    | chr7 | 94042394/G//C   | nonsynonymous | 1 | 0 |
| PEG10     | chr7 | 94294151/G//T   | nonsynonymous | 1 | 0 |

|              |      |                 |               |   |   |
|--------------|------|-----------------|---------------|---|---|
| DLX6         | chr7 | 96639390/C//A   | synonymous    | 1 | 0 |
| TRRAP        | chr7 | 98557020/G//T   | synonymous    | 1 | 0 |
| SMURF1       | chr7 | 98639755/A//T   | nonsynonymous | 1 | 0 |
| BUD31        | chr7 | 99013890/A//T   | synonymous    | 1 | 0 |
| ATP5J2-PTCD1 | chr7 | 99063824/C//G   | synonymous    | 1 | 0 |
| CYP3A5       | chr7 | 99270212/T//G   | synonymous    | 1 | 0 |
| PPP1R35      | chr7 | 100033001/C//T  | synonymous    | 1 | 0 |
| ACTL6B       | chr7 | 100253510/G//T  | synonymous    | 1 | 0 |
| ZAN          | chr7 | 100349588/C//T  | synonymous    | 1 | 0 |
| ZAN          | chr7 | 100350737/C//A  | synonymous    | 1 | 0 |
| EPHB4        | chr7 | 100417352/C//T  | nonsynonymous | 1 | 0 |
| MUC12        | chr7 | 100634129/C//A  | synonymous    | 1 | 0 |
| MUC12        | chr7 | 100648071/A//C  | nonsynonymous | 1 | 0 |
| MUC12        | chr7 | 100660888/G//C  | nonsynonymous | 1 | 0 |
| MUC17        | chr7 | 100677405/G//A  | nonsynonymous | 1 | 0 |
| COL26A1      | chr7 | 101192503/A//T  | nonsynonymous | 1 | 0 |
| CUX1         | chr7 | 101840138/C//T  | nonsynonymous | 1 | 0 |
| RELN         | chr7 | 103252095/G//T  | nonsynonymous | 1 | 0 |
| RELN         | chr7 | 103368594/G//T  | synonymous    | 1 | 0 |
| RINT1        | chr7 | 105190556/C//T  | synonymous    | 1 | 0 |
| PIK3CG       | chr7 | 106508696/C//G  | nonsynonymous | 1 | 0 |
| PRKAR2B      | chr7 | 106685496/C//T  | synonymous    | 1 | 0 |
| COG5         | chr7 | 106938787/C//A  | synonymous    | 1 | 0 |
| SLC26A3      | chr7 | 107434261/G//T  | nonsynonymous | 1 | 0 |
| LAMB1        | chr7 | 107626690/G//T  | nonsynonymous | 1 | 0 |
| TMEM168      | chr7 | 112424925/C//G  | synonymous    | 1 | 0 |
| CFTR         | chr7 | 117232334/A//G  | nonsynonymous | 1 | 0 |
| KCND2        | chr7 | 120381687/C//A  | synonymous    | 1 | 0 |
| WNT16        | chr7 | 120969652/G//C  | nonsynonymous | 1 | 0 |
| PTPRZ1       | chr7 | 121652513/C//T  | nonsynonymous | 1 | 0 |
| AASS         | chr7 | 121733004/C//A  | nonsynonymous | 1 | 0 |
| CADPS2       | chr7 | 122131475/C//A  | nonsynonymous | 1 | 0 |
| TMEM229A     | chr7 | 123672057/C//G  | nonsynonymous | 1 | 0 |
| GRM8         | chr7 | 126086196/C//T  | synonymous    | 1 | 0 |
| GRM8         | chr7 | 126410118/C//G  | synonymous    | 1 | 0 |
| FLNC         | chr7 | 128492955/C//T  | synonymous    | 1 | 0 |
| TNPO3        | chr7 | 128620088/G//A  | synonymous    | 1 | 0 |
| SMO          | chr7 | 128851931/G//T  | nonsynonymous | 1 | 0 |
| PLXNA4       | chr7 | 131895739/C//A  | nonsynonymous | 1 | 0 |
| PLXNA4       | chr7 | 131912367/T//C  | synonymous    | 1 | 0 |
| EXOC4        | chr7 | 132937834/CT//C | synonymous    | 1 | 0 |
| STRA8        | chr7 | 134931354/C//A  | nonsynonymous | 1 | 0 |
| NUP205       | chr7 | 135262745/A//T  | nonsynonymous | 1 | 0 |
| DGKI         | chr7 | 137150709/G//T  | nonsynonymous | 1 | 0 |
| DENND2A      | chr7 | 140218533/T//A  | nonsynonymous | 1 | 0 |
| DENND2A      | chr7 | 140255506/C//G  | nonsynonymous | 1 | 0 |
| WEE2         | chr7 | 141424969/C//G  | synonymous    | 1 | 0 |
| PRSS1        | chr7 | 142459771/G//T  | nonsynonymous | 1 | 0 |
| TRPV5        | chr7 | 142612146/G//T  | nonsynonymous | 1 | 0 |
| KEL          | chr7 | 142641427/G//T  | synonymous    | 1 | 0 |
| OR9A2        | chr7 | 142723760/A//G  | nonsynonymous | 1 | 0 |
| CLCN1        | chr7 | 143043323/C//A  | nonsynonymous | 1 | 0 |
| CLCN1        | chr7 | 143047702/C//T  | synonymous    | 1 | 0 |
| EPHA1        | chr7 | 143096887/C//A  | nonsynonymous | 1 | 0 |
| CNTNAP2      | chr7 | 146805381/G//T  | nonsynonymous | 1 | 0 |
| CNTNAP2      | chr7 | 146818087/C//G  | synonymous    | 1 | 0 |
| CNTNAP2      | chr7 | 147844655/C//A  | nonsynonymous | 1 | 0 |
| CNTNAP2      | chr7 | 147869415/G//C  | nonsynonymous | 1 | 0 |
| EZH2         | chr7 | 148525888/C//A  | nonsynonymous | 1 | 0 |
| EZH2         | chr7 | 148529770/C//A  | nonsynonymous | 1 | 0 |
| ZNF398       | chr7 | 148875791/C//T  | nonsynonymous | 1 | 0 |
| SSPO         | chr7 | 149482637/G//T  | nonsynonymous | 1 | 0 |
| SSPO         | chr7 | 149488947/C//G  | nonsynonymous | 1 | 0 |
| SSPO         | chr7 | 149517834/G//C  | nonsynonymous | 1 | 0 |
| SSPO         | chr7 | 149520942/G//T  | synonymous    | 1 | 0 |
| GIMAP1       | chr7 | 150417558/G//A  | nonsynonymous | 1 | 0 |
| AOC1         | chr7 | 150553627/G//T  | synonymous    | 1 | 0 |
| ASB10        | chr7 | 150878190/G//T  | nonsynonymous | 1 | 0 |
| PRKAG2       | chr7 | 151273506/G//A  | synonymous    | 1 | 0 |
| ACTR3B       | chr7 | 152550643/G//C  | nonsynonymous | 1 | 0 |

|          |      |                |               |   |   |
|----------|------|----------------|---------------|---|---|
| ARHGEF10 | chr8 | 1851439/G//T   | synonymous    | 1 | 0 |
| MCPH1    | chr8 | 6302738/G//T   | nonsynonymous | 1 | 0 |
| PINX1    | chr8 | 10622970/C//A  | nonsynonymous | 1 | 0 |
| DLC1     | chr8 | 12957837/C//A  | nonsynonymous | 1 | 0 |
| DLC1     | chr8 | 13251154/G//T  | nonsynonymous | 1 | 0 |
| MSR1     | chr8 | 16026281/C//A  | nonsynonymous | 1 | 0 |
| PIWIL2   | chr8 | 22173801/G//A  | nonsynonymous | 1 | 0 |
| PDLIM2   | chr8 | 22447129/G//A  | nonsynonymous | 1 | 0 |
| BIN3     | chr8 | 22526602/A//G  | synonymous    | 1 | 0 |
| EBF2     | chr8 | 25744343/C//G  | nonsynonymous | 1 | 0 |
| SCARA3   | chr8 | 27507276/G//T  | nonsynonymous | 1 | 0 |
| INTS9    | chr8 | 28635450/C//T  | nonsynonymous | 1 | 0 |
| TEX15    | chr8 | 30695008/G//A  | nonsynonymous | 1 | 0 |
| TEX15    | chr8 | 30700593/G//T  | nonsynonymous | 1 | 0 |
| UNC5D    | chr8 | 35093301/G//T  | synonymous    | 1 | 0 |
| KCNU1    | chr8 | 36793271/A//T  | nonsynonymous | 1 | 0 |
| ZNF703   | chr8 | 37555184/G//T  | synonymous    | 1 | 0 |
| PROSC    | chr8 | 37623143/G//A  | nonsynonymous | 1 | 0 |
| ADRB3    | chr8 | 37823289/G//T  | synonymous    | 1 | 0 |
| FGFR1    | chr8 | 38314916/T//G  | nonsynonymous | 1 | 0 |
| ANK1     | chr8 | 41575669/C//A  | nonsynonymous | 1 | 0 |
| ANK1     | chr8 | 41580695/C//G  | nonsynonymous | 1 | 0 |
| HGSNAT   | chr8 | 43025814/C//T  | synonymous    | 1 | 0 |
| PRKDC    | chr8 | 48689467/G//T  | synonymous    | 1 | 0 |
| SNTG1    | chr8 | 51617178/C//A  | synonymous    | 1 | 0 |
| PXDNL    | chr8 | 52320840/G//T  | nonsynonymous | 1 | 0 |
| PXDNL    | chr8 | 52320921/G//C  | nonsynonymous | 1 | 0 |
| SOX17    | chr8 | 55370639/G//A  | synonymous    | 1 | 0 |
| SOX17    | chr8 | 55371890/C//G  | nonsynonymous | 1 | 0 |
| TGS1     | chr8 | 56686263/C//T  | nonsynonymous | 1 | 0 |
|          | chr8 | 62588621/C//G  | synonymous    | 1 | 0 |
| BHLHE22  | chr8 | 65493589/G//C  | nonsynonymous | 1 | 0 |
| TRIM55   | chr8 | 67047252/G//T  | nonsynonymous | 1 | 0 |
| CSPP1    | chr8 | 68018198/G//T  | nonsynonymous | 1 | 0 |
| SULF1    | chr8 | 70515483/G//T  | nonsynonymous | 1 | 0 |
| SULF1    | chr8 | 70533472/A//G  | nonsynonymous | 1 | 0 |
| EYA1     | chr8 | 72233985/G//T  | nonsynonymous | 1 | 0 |
| PI15     | chr8 | 75757682/G//T  | nonsynonymous | 1 | 0 |
| ZFHx4    | chr8 | 77616356/G//T  | nonsynonymous | 1 | 0 |
| ZFHx4    | chr8 | 77616531/G//C  | nonsynonymous | 1 | 0 |
| ZFHx4    | chr8 | 77766766/T//A  | nonsynonymous | 1 | 0 |
| RALYL    | chr8 | 85762228/G//A  | nonsynonymous | 1 | 0 |
| LRRCC1   | chr8 | 86042248/C//G  | nonsynonymous | 1 | 0 |
| CA2      | chr8 | 86376223/G//A  | synonymous    | 1 | 0 |
| DCAF4L2  | chr8 | 88885461/C//A  | nonsynonymous | 1 | 0 |
| DCAF4L2  | chr8 | 88885779/G//T  | nonsynonymous | 1 | 0 |
| DCAF4L2  | chr8 | 88885860/C//A  | nonsynonymous | 1 | 0 |
| DCAF4L2  | chr8 | 88886131/G//T  | synonymous    | 1 | 0 |
| MMP16    | chr8 | 89068384/C//A  | nonsynonymous | 1 | 0 |
| MMP16    | chr8 | 89180039/A//T  | nonsynonymous | 1 | 0 |
| SLC26A7  | chr8 | 92352778/A//T  | nonsynonymous | 1 | 0 |
| RUNX1T1  | chr8 | 93004084/C//A  | nonsynonymous | 1 | 0 |
| TMEM67   | chr8 | 94821380/C//T  | synonymous    | 1 | 0 |
| CDH17    | chr8 | 95186481/G//A  | synonymous    | 1 | 0 |
| GDF6     | chr8 | 97156968/G//T  | synonymous    | 1 | 0 |
| GDF6     | chr8 | 97157062/A//T  | nonsynonymous | 1 | 0 |
| PTDSS1   | chr8 | 97342446/C//T  | synonymous    | 1 | 0 |
| ODF1     | chr8 | 103572827/C//G | nonsynonymous | 1 | 0 |
| RIMS2    | chr8 | 104897962/G//T | nonsynonymous | 1 | 0 |
| EIF3E    | chr8 | 109228731/T//A | synonymous    | 1 | 0 |
| TRHR     | chr8 | 110131396/C//G | synonymous    | 1 | 0 |
| PKHD1L1  | chr8 | 110408346/C//T | nonsynonymous | 1 | 0 |
| PKHD1L1  | chr8 | 110467003/G//C | nonsynonymous | 1 | 0 |
| SYBU     | chr8 | 110631068/G//A | synonymous    | 1 | 0 |
| CSMD3    | chr8 | 113253963/C//G | nonsynonymous | 1 | 0 |
| CSMD3    | chr8 | 113259326/C//A | nonsynonymous | 1 | 0 |
| CSMD3    | chr8 | 113364693/C//A | nonsynonymous | 1 | 0 |
| CSMD3    | chr8 | 113529397/C//G | nonsynonymous | 1 | 0 |
| CSMD3    | chr8 | 113650978/C//A | nonsynonymous | 1 | 0 |
| ATAD2    | chr8 | 124346562/T//A | nonsynonymous | 1 | 0 |

|           |       |                |               |   |   |
|-----------|-------|----------------|---------------|---|---|
| ATAD2     | chr8  | 124371897/C//T | nonsynonymous | 1 | 0 |
| KLHL38    | chr8  | 124665005/G//T | synonymous    | 1 | 0 |
| FER1L6    | chr8  | 125015549/C//T | synonymous    | 1 | 0 |
| SQLE      | chr8  | 126030440/C//G | nonsynonymous | 1 | 0 |
| ADCY8     | chr8  | 131848578/C//T | nonsynonymous | 1 | 0 |
| TG        | chr8  | 133899603/T//C | synonymous    | 1 | 0 |
| NDRG1     | chr8  | 134266834/G//T | nonsynonymous | 1 | 0 |
| ST3GAL1   | chr8  | 134478165/C//A | nonsynonymous | 1 | 0 |
| COL22A1   | chr8  | 139697504/G//A | nonsynonymous | 1 | 0 |
| MROH5     | chr8  | 142483034/C//G | synonymous    | 1 | 0 |
| ZFP41     | chr8  | 144332101/G//T | nonsynonymous | 1 | 0 |
| GSDMD     | chr8  | 144644683/C//T | nonsynonymous | 1 | 0 |
| PLEC      | chr8  | 145001464/C//T | nonsynonymous | 1 | 0 |
| GPAA1     | chr8  | 145138660/G//T | nonsynonymous | 1 | 0 |
| HGH1      | chr8  | 145193656/C//T | nonsynonymous | 1 | 0 |
| FOXH1     | chr8  | 145700005/G//A | synonymous    | 1 | 0 |
| LRRC24    | chr8  | 145750302/G//T | synonymous    | 1 | 0 |
| DOCK8     | chr9  | 312135/A//T    | nonsynonymous | 1 | 0 |
| KANK1     | chr9  | 713469/G//T    | synonymous    | 1 | 0 |
| INSL4     | chr9  | 5233695/G//T   | nonsynonymous | 1 | 0 |
| PTPRD     | chr9  | 8341964/C//A   | nonsynonymous | 1 | 0 |
| FREM1     | chr9  | 14851545/C//G  | nonsynonymous | 1 | 0 |
| CCDC171   | chr9  | 15724769/G//T  | synonymous    | 1 | 0 |
| PLIN2     | chr9  | 19121167/T//A  | synonymous    | 1 | 0 |
| IFNA7     | chr9  | 21202158/G//T  | synonymous    | 1 | 0 |
| IFNA5     | chr9  | 21305197/C//T  | nonsynonymous | 1 | 0 |
| PLAA      | chr9  | 26947038/C//A  | synonymous    | 1 | 0 |
| LINGO2    | chr9  | 27949588/C//T  | nonsynonymous | 1 | 0 |
| KIAA1161  | chr9  | 34372433/C//A  | nonsynonymous | 1 | 0 |
| CD72      | chr9  | 35612979/G//T  | nonsynonymous | 1 | 0 |
| GBA2      | chr9  | 35738036/C//T  | nonsynonymous | 1 | 0 |
| OR13J1    | chr9  | 35869646/G//T  | nonsynonymous | 1 | 0 |
| GLIPR2    | chr9  | 36150906/G//C  | nonsynonymous | 1 | 0 |
| POLR1E    | chr9  | 37486092/G//C  | synonymous    | 1 | 0 |
| SHB       | chr9  | 37919910/C//A  | nonsynonymous | 1 | 0 |
| TJP2      | chr9  | 71836170/G//T  | nonsynonymous | 1 | 0 |
| CEP78     | chr9  | 80868174/A//C  | nonsynonymous | 1 | 0 |
| PSAT1     | chr9  | 80919645/G//T  | synonymous    | 1 | 0 |
| SPATA31D1 | chr9  | 84606340/A//T  | nonsynonymous | 1 | 0 |
| SPATA31D1 | chr9  | 84607183/A//G  | nonsynonymous | 1 | 0 |
| RASEF     | chr9  | 85637272/T//C  | synonymous    | 1 | 0 |
| SPATA31E1 | chr9  | 90500395/T//A  | synonymous    | 1 | 0 |
| CCDC180   | chr9  | 100128881/A//G | nonsynonymous | 1 | 0 |
| TDRD7     | chr9  | 100201566/G//T | nonsynonymous | 1 | 0 |
| ALDOB     | chr9  | 104184125/G//T | nonsynonymous | 1 | 0 |
| GRIN3A    | chr9  | 104500066/T//A | nonsynonymous | 1 | 0 |
| CYLC2     | chr9  | 105767423/G//T | nonsynonymous | 1 | 0 |
| PTPN3     | chr9  | 112153744/T//C | synonymous    | 1 | 0 |
| ASTN2     | chr9  | 119382637/G//T | nonsynonymous | 1 | 0 |
| CNTRL     | chr9  | 123906258/G//T | synonymous    | 1 | 0 |
| LHX6      | chr9  | 124966934/G//A | synonymous    | 1 | 0 |
|           | chr9  | 124990646/C//T | synonymous    | 1 | 0 |
| OR1B1     | chr9  | 125391069/G//T | nonsynonymous | 1 | 0 |
| RC3H2     | chr9  | 125627694/T//C | nonsynonymous | 1 | 0 |
| GOLGA2    | chr9  | 131025336/G//C | synonymous    | 1 | 0 |
| ZER1      | chr9  | 131515742/T//G | synonymous    | 1 | 0 |
| NUP188    | chr9  | 131749108/A//C | nonsynonymous | 1 | 0 |
| C9orf78   | chr9  | 132591485/C//G | nonsynonymous | 1 | 0 |
| USP20     | chr9  | 132637214/G//T | nonsynonymous | 1 | 0 |
| QRFP      | chr9  | 133768899/G//A | synonymous    | 1 | 0 |
|           | chr9  | 134585068/C//A | synonymous    | 1 | 0 |
| TSC1      | chr9  | 135776204/G//A | synonymous    | 1 | 0 |
| SARDH     | chr9  | 136584084/C//A | nonsynonymous | 1 | 0 |
| PPP1R26   | chr9  | 138377778/G//T | synonymous    | 1 | 0 |
| NACC2     | chr9  | 138903608/G//A | synonymous    | 1 | 0 |
| NOTCH1    | chr9  | 139397700/C//A | nonsynonymous | 1 | 0 |
| CACNA1B   | chr9  | 140811886/G//A | synonymous    | 1 | 0 |
| CACNA1B   | chr9  | 141013140/G//T | nonsynonymous | 1 | 0 |
| DIP2C     | chr10 | 454910/T//G    | nonsynonymous | 1 | 0 |
| PFKP      | chr10 | 3155576/G//T   | nonsynonymous | 1 | 0 |

|           |       |                |               |   |   |
|-----------|-------|----------------|---------------|---|---|
| FBXO18    | chr10 | 5945022/G//T   | nonsynonymous | 1 | 0 |
| SFMBT2    | chr10 | 7409775/T//A   | nonsynonymous | 1 | 0 |
| ITIH5     | chr10 | 7627979/G//T   | nonsynonymous | 1 | 0 |
| USP6NL    | chr10 | 11505405/C//A  | nonsynonymous | 1 | 0 |
| CUBN      | chr10 | 17083205/C//A  | nonsynonymous | 1 | 0 |
| CUBN      | chr10 | 17151725/C//A  | nonsynonymous | 1 | 0 |
| KIAA1217  | chr10 | 24762772/G//T  | nonsynonymous | 1 | 0 |
| MYO3A     | chr10 | 26459403/A//T  | synonymous    | 1 | 0 |
| SVIL      | chr10 | 29812603/G//T  | nonsynonymous | 1 | 0 |
| RET       | chr10 | 43604528/G//C  | nonsynonymous | 1 | 0 |
| TMEM72    | chr10 | 45430384/G//A  | synonymous    | 1 | 0 |
| ALOX5     | chr10 | 45938962/G//T  | nonsynonymous | 1 | 0 |
| GDF2      | chr10 | 48413793/C//A  | nonsynonymous | 1 | 0 |
| FRMPD2    | chr10 | 49400755/C//G  | nonsynonymous | 1 | 0 |
| WDFY4     | chr10 | 49934009/G//A  | synonymous    | 1 | 0 |
| WDFY4     | chr10 | 49994877/C//A  | nonsynonymous | 1 | 0 |
| FAM170B   | chr10 | 50339851/A//T  | nonsynonymous | 1 | 0 |
| ASAH2     | chr10 | 52005042/A//T  | nonsynonymous | 1 | 0 |
| PRKG1     | chr10 | 52912983/T//A  | nonsynonymous | 1 | 0 |
| LRRTM3    | chr10 | 68687097/C//T  | synonymous    | 1 | 0 |
| CTNNA3    | chr10 | 69299402/C//T  | synonymous    | 1 | 0 |
| MYPN      | chr10 | 69959315/T//C  | nonsynonymous | 1 | 0 |
| TET1      | chr10 | 70334014/G//A  | synonymous    | 1 | 0 |
| CCAR1     | chr10 | 70549649/G//A  | nonsynonymous | 1 | 0 |
| HKDC1     | chr10 | 71007239/C//A  | synonymous    | 1 | 0 |
| ADAMTS14  | chr10 | 72434476/C//T  | nonsynonymous | 1 | 0 |
| ADAMTS14  | chr10 | 72498706/G//T  | nonsynonymous | 1 | 0 |
| CDH23     | chr10 | 73199655/G//T  | nonsynonymous | 1 | 0 |
| CDH23     | chr10 | 73337717/G//T  | nonsynonymous | 1 | 0 |
| CDH23     | chr10 | 73501685/G//C  | synonymous    | 1 | 0 |
| DNAJB12   | chr10 | 74100593/C//A  | nonsynonymous | 1 | 0 |
| DLG5      | chr10 | 79589245/T//G  | nonsynonymous | 1 | 0 |
| ZMIZ1     | chr10 | 81070858/G//T  | nonsynonymous | 1 | 0 |
| SH2D4B    | chr10 | 82348405/G//T  | nonsynonymous | 1 | 0 |
| CDHR1     | chr10 | 85971462/G//T  | nonsynonymous | 1 | 0 |
| GRID1     | chr10 | 87614323/G//A  | nonsynonymous | 1 | 0 |
| GRID1     | chr10 | 87615808/G//C  | nonsynonymous | 1 | 0 |
| WAPL      | chr10 | 88260218/A//G  | nonsynonymous | 1 | 0 |
| LDB3      | chr10 | 88476504/G//T  | nonsynonymous | 1 | 0 |
| PPP1R3C   | chr10 | 93390074/G//C  | nonsynonymous | 1 | 0 |
| CYP26C1   | chr10 | 94822523/C//T  | nonsynonymous | 1 | 0 |
| MYOF      | chr10 | 95126156/C//A  | nonsynonymous | 1 | 0 |
| RBP4      | chr10 | 95360210/C//A  | nonsynonymous | 1 | 0 |
| PLCE1     | chr10 | 95791186/C//G  | nonsynonymous | 1 | 0 |
| PLCE1     | chr10 | 96006251/C//A  | nonsynonymous | 1 | 0 |
| NOC3L     | chr10 | 96114825/C//A  | nonsynonymous | 1 | 0 |
| CYP2C18   | chr10 | 96493197/T//A  | nonsynonymous | 1 | 0 |
| DNTT      | chr10 | 98079040/A//T  | nonsynonymous | 1 | 0 |
| PIK3AP1   | chr10 | 98369619/C//A  | nonsynonymous | 1 | 0 |
| LCOR      | chr10 | 98715591/G//T  | nonsynonymous | 1 | 0 |
| PGAM1     | chr10 | 99192140/G//A  | synonymous    | 1 | 0 |
| PYROXD2   | chr10 | 100148271/C//A | synonymous    | 1 | 0 |
| ABCC2     | chr10 | 101556931/C//T | nonsynonymous | 1 | 0 |
| PAX2      | chr10 | 102541053/G//T | nonsynonymous | 1 | 0 |
| LBX1      | chr10 | 102988405/C//A | synonymous    | 1 | 0 |
| NEURL1    | chr10 | 105254216/C//A | synonymous    | 1 | 0 |
| SORCS3    | chr10 | 106675604/G//T | nonsynonymous | 1 | 0 |
| SORCS1    | chr10 | 108439399/C//A | nonsynonymous | 1 | 0 |
| SORCS1    | chr10 | 108923885/C//T | nonsynonymous | 1 | 0 |
| SMC3      | chr10 | 112327469/C//A | synonymous    | 1 | 0 |
| CCDC186   | chr10 | 115885698/G//A | nonsynonymous | 1 | 0 |
| VWA2      | chr10 | 116037671/A//T | nonsynonymous | 1 | 0 |
| PNLIPRP2  | chr10 | 118396397/G//A | synonymous    | 1 | 0 |
| WDR11     | chr10 | 122619647/G//C | nonsynonymous | 1 | 0 |
| FGFR2     | chr10 | 123263358/C//A | nonsynonymous | 1 | 0 |
| DMBT1     | chr10 | 124336167/G//T | nonsynonymous | 1 | 0 |
| C10orf120 | chr10 | 124457799/G//T | nonsynonymous | 1 | 0 |
|           | chr10 | 128810519/G//T | synonymous    | 1 | 0 |
| MKI67     | chr10 | 129905753/T//A | nonsynonymous | 1 | 0 |
| MKI67     | chr10 | 129907047/T//C | synonymous    | 1 | 0 |

|           |       |                |               |   |   |
|-----------|-------|----------------|---------------|---|---|
| MKI67     | chr10 | 129907064/G//C | nonsynonymous | 1 | 0 |
| KNDC1     | chr10 | 135032421/G//T | synonymous    | 1 | 0 |
|           | chr10 | 135125185/G//T | synonymous    | 1 | 0 |
| PHRF1     | chr11 | 592681/G//T    | synonymous    | 1 | 0 |
| PHRF1     | chr11 | 606454/T//C    | synonymous    | 1 | 0 |
| KCNQ1     | chr11 | 2594172/C//T   | nonsynonymous | 1 | 0 |
| PGAP2     | chr11 | 3819154/G//T   | synonymous    | 1 | 0 |
| STIM1     | chr11 | 4103454/C//G   | nonsynonymous | 1 | 0 |
| OR52K2    | chr11 | 4470742/A//G   | nonsynonymous | 1 | 0 |
| OR51E1    | chr11 | 4673811/G//T   | nonsynonymous | 1 | 0 |
| OR51T1    | chr11 | 4903894/G//T   | synonymous    | 1 | 0 |
| OR51G1    | chr11 | 4944957/C//G   | nonsynonymous | 1 | 0 |
| OR51A2    | chr11 | 4976732/G//T   | nonsynonymous | 1 | 0 |
| OR52J3    | chr11 | 5068616/T//A   | synonymous    | 1 | 0 |
| OR52A1    | chr11 | 5173599/T//C   | nonsynonymous | 1 | 0 |
| HBG2      | chr11 | 5274501/G//T   | synonymous    | 1 | 0 |
| OR51M1    | chr11 | 5410623/C//T   | synonymous    | 1 | 0 |
| OR51M1    | chr11 | 5411121/C//A   | nonsynonymous | 1 | 0 |
| OR51Q1    | chr11 | 5443974/C//A   | nonsynonymous | 1 | 0 |
| TRIM5     | chr11 | 5701037/C//A   | nonsynonymous | 1 | 0 |
| OR52E6    | chr11 | 5862797/C//G   | nonsynonymous | 1 | 0 |
| OR56A5    | chr11 | 5989180/C//T   | nonsynonymous | 1 | 0 |
| OR52L1    | chr11 | 6007406/C//T   | nonsynonymous | 1 | 0 |
| OR56A1    | chr11 | 6048404/C//A   | synonymous    | 1 | 0 |
| OR56A1    | chr11 | 6048729/A//G   | nonsynonymous | 1 | 0 |
| RRP8      | chr11 | 6622155/C//A   | nonsynonymous | 1 | 0 |
| TAF10     | chr11 | 6632676/T//A   | nonsynonymous | 1 | 0 |
| DCHS1     | chr11 | 6643086/G//T   | nonsynonymous | 1 | 0 |
| OR2AG2    | chr11 | 6789356/T//A   | nonsynonymous | 1 | 0 |
| OR2AG1    | chr11 | 6806433/C//G   | synonymous    | 1 | 0 |
| ZNF214    | chr11 | 7021511/T//A   | nonsynonymous | 1 | 0 |
| NLRP14    | chr11 | 7067915/A//T   | nonsynonymous | 1 | 0 |
| OVCH2     | chr11 | 7718312/C//A   | synonymous    | 1 | 0 |
| WEE1      | chr11 | 9607037/G//T   | nonsynonymous | 1 | 0 |
| CTR9      | chr11 | 10800342/G//T  | nonsynonymous | 1 | 0 |
| MICALCL   | chr11 | 12315696/C//T  | synonymous    | 1 | 0 |
| ABCC8     | chr11 | 17436057/AC//A | nonsynonymous | 1 | 0 |
| ABCC8     | chr11 | 17449841/C//A  | nonsynonymous | 1 | 0 |
|           | chr11 | 17803235/C//A  | synonymous    | 1 | 0 |
| MRGPRX3   | chr11 | 18159382/G//A  | synonymous    | 1 | 0 |
| MRGPRX4   | chr11 | 18194973/G//T  | nonsynonymous | 1 | 0 |
| MRGPRX4   | chr11 | 18195199/C//A  | nonsynonymous | 1 | 0 |
| GTF2H1    | chr11 | 18373889/C//T  | nonsynonymous | 1 | 0 |
| LDHA      | chr11 | 18422424/G//A  | synonymous    | 1 | 0 |
| LDHC      | chr11 | 18472566/G//T  | synonymous    | 1 | 0 |
| IGSF22    | chr11 | 18741769/C//A  | nonsynonymous | 1 | 0 |
| PRMT3     | chr11 | 20419192/G//T  | synonymous    | 1 | 0 |
| LUZP2     | chr11 | 24518785/G//T  | synonymous    | 1 | 0 |
| ANO3      | chr11 | 26646015/G//A  | nonsynonymous | 1 | 0 |
| KCNA4     | chr11 | 30032503/C//A  | nonsynonymous | 1 | 0 |
| KCNA4     | chr11 | 30032534/G//T  | nonsynonymous | 1 | 0 |
| KCNA4     | chr11 | 30033370/C//A  | nonsynonymous | 1 | 0 |
| MPPED2    | chr11 | 30557666/C//A  | nonsynonymous | 1 | 0 |
| DCDC5     | chr11 | 30914526/G//T  | nonsynonymous | 1 | 0 |
| DCDC1     | chr11 | 31327897/C//G  | nonsynonymous | 1 | 0 |
| WT1       | chr11 | 32450152/G//A  | synonymous    | 1 | 0 |
| CCDC73    | chr11 | 32637504/C//G  | nonsynonymous | 1 | 0 |
| QSER1     | chr11 | 32955806/C//G  | nonsynonymous | 1 | 0 |
| QSER1     | chr11 | 32997884/C//T  | nonsynonymous | 1 | 0 |
| KIAA1549L | chr11 | 33566608/A//T  | synonymous    | 1 | 0 |
| CD59      | chr11 | 33743949/C//A  | nonsynonymous | 1 | 0 |
| LDLRAD3   | chr11 | 36248924/G//C  | nonsynonymous | 1 | 0 |
| COMMD9    | chr11 | 36310986/G//C  | synonymous    | 1 | 0 |
| PHF21A    | chr11 | 45959820/C//A  | nonsynonymous | 1 | 0 |
| CKAP5     | chr11 | 46772944/C//A  | nonsynonymous | 1 | 0 |
| FNBP4     | chr11 | 47789022/G//T  | synonymous    | 1 | 0 |
| NUP160    | chr11 | 47801933/C//A  | nonsynonymous | 1 | 0 |
| OR4X1     | chr11 | 48285761/G//T  | nonsynonymous | 1 | 0 |
| OR4C6     | chr11 | 55433526/C//T  | nonsynonymous | 1 | 0 |
| OR5D14    | chr11 | 55563348/C//A  | nonsynonymous | 1 | 0 |

|          |       |                |               |   |   |
|----------|-------|----------------|---------------|---|---|
| OR5L1    | chr11 | 55579551/C//A  | synonymous    | 1 | 0 |
| OR5D18   | chr11 | 55587556/G//T  | nonsynonymous | 1 | 0 |
| OR5L2    | chr11 | 55595193/C//T  | nonsynonymous | 1 | 0 |
| TRIM51   | chr11 | 55653123/G//T  | nonsynonymous | 1 | 0 |
| OR5F1    | chr11 | 55761363/C//G  | nonsynonymous | 1 | 0 |
| OR8H2    | chr11 | 55872778/T//A  | nonsynonymous | 1 | 0 |
| OR5M10   | chr11 | 56344622/G//A  | synonymous    | 1 | 0 |
| OR5M10   | chr11 | 56344665/T//C  | nonsynonymous | 1 | 0 |
| APLNR    | chr11 | 57003468/G//T  | nonsynonymous | 1 | 0 |
| TNKS1BP1 | chr11 | 57080570/G//T  | nonsynonymous | 1 | 0 |
| SLC43A1  | chr11 | 57259326/G//A  | nonsynonymous | 1 | 0 |
| OR1S2    | chr11 | 57970952/G//C  | nonsynonymous | 1 | 0 |
| OR10Q1   | chr11 | 57995952/G//C  | nonsynonymous | 1 | 0 |
| OR5B2    | chr11 | 58190380/C//T  | nonsynonymous | 1 | 0 |
| OR5B2    | chr11 | 58190654/G//T  | synonymous    | 1 | 0 |
| OR5B12   | chr11 | 58206869/T//C  | synonymous    | 1 | 0 |
| MPEG1    | chr11 | 58979250/G//C  | nonsynonymous | 1 | 0 |
| OSBP     | chr11 | 59361614/C//T  | nonsynonymous | 1 | 0 |
| MS4A10   | chr11 | 60557844/T//A  | nonsynonymous | 1 | 0 |
| TMEM109  | chr11 | 60689365/G//T  | nonsynonymous | 1 | 0 |
| VWCE     | chr11 | 61048411/C//A  | nonsynonymous | 1 | 0 |
| FADS1    | chr11 | 61584129/C//A  | synonymous    | 1 | 0 |
| FADS3    | chr11 | 61646847/G//A  | synonymous    | 1 | 0 |
| AHNAK    | chr11 | 62298088/G//A  | synonymous    | 1 | 0 |
| TUT1     | chr11 | 62359102/C//A  | synonymous    | 1 | 0 |
| EML3     | chr11 | 62369941/C//G  | synonymous    | 1 | 0 |
| B3GAT3   | chr11 | 62389402/C//G  | nonsynonymous | 1 | 0 |
| GANAB    | chr11 | 62393809/G//A  | synonymous    | 1 | 0 |
| SLC22A8  | chr11 | 62763206/C//G  | nonsynonymous | 1 | 0 |
|          | chr11 | 62848389/C//G  | synonymous    | 1 | 0 |
| STIP1    | chr11 | 63961802/G//C  | nonsynonymous | 1 | 0 |
| FERMT3   | chr11 | 63987025/G//A  | synonymous    | 1 | 0 |
| ESRRA    | chr11 | 64082681/G//T  | nonsynonymous | 1 | 0 |
| NRXN2    | chr11 | 64375181/C//A  | synonymous    | 1 | 0 |
| ATG2A    | chr11 | 64675324/G//T  | nonsynonymous | 1 | 0 |
| AP5B1    | chr11 | 65546222/C//G  | nonsynonymous | 1 | 0 |
| SART1    | chr11 | 65733406/A//T  | nonsynonymous | 1 | 0 |
| KLC2     | chr11 | 66033220/C//T  | nonsynonymous | 1 | 0 |
| CARNS1   | chr11 | 67188583/C//T  | nonsynonymous | 1 | 0 |
| TBX10    | chr11 | 67402462/C//T  | synonymous    | 1 | 0 |
| GAL      | chr11 | 68458524/C//T  | synonymous    | 1 | 0 |
| CPT1A    | chr11 | 68529087/C//A  | nonsynonymous | 1 | 0 |
| PPFIA1   | chr11 | 70218588/G//C  | nonsynonymous | 1 | 0 |
| CTTN     | chr11 | 70260715/G//T  | nonsynonymous | 1 | 0 |
| NUMA1    | chr11 | 71724325/C//A  | nonsynonymous | 1 | 0 |
| PLEKHB1  | chr11 | 73372575/C//A  | synonymous    | 1 | 0 |
| UCP3     | chr11 | 73712560/G//C  | nonsynonymous | 1 | 0 |
| RNF169   | chr11 | 74460106/C//T  | nonsynonymous | 1 | 0 |
| XRRA1    | chr11 | 74562206/C//T  | nonsynonymous | 1 | 0 |
| NEU3     | chr11 | 74717068/G//T  | nonsynonymous | 1 | 0 |
| WNT11    | chr11 | 75907762/C//A  | synonymous    | 1 | 0 |
| MYO7A    | chr11 | 76866947/C//A  | synonymous    | 1 | 0 |
| MYO7A    | chr11 | 76883889/C//G  | nonsynonymous | 1 | 0 |
| MYO7A    | chr11 | 76885964/C//G  | synonymous    | 1 | 0 |
| INTS4    | chr11 | 77702202/C//G  | synonymous    | 1 | 0 |
| INTS4    | chr11 | 77705693/T//A  | synonymous    | 1 | 0 |
| TENM4    | chr11 | 78565192/G//A  | synonymous    | 1 | 0 |
| TENM4    | chr11 | 78780912/G//A  | synonymous    | 1 | 0 |
| FAM181B  | chr11 | 82443842/C//A  | synonymous    | 1 | 0 |
| PCF11    | chr11 | 82868648/C//G  | nonsynonymous | 1 | 0 |
| CCDC89   | chr11 | 85396457/C//A  | nonsynonymous | 1 | 0 |
| TRIM49C  | chr11 | 89774566/C//A  | nonsynonymous | 1 | 0 |
| FAT3     | chr11 | 92507345/A//T  | nonsynonymous | 1 | 0 |
| FAT3     | chr11 | 92600318/G//T  | nonsynonymous | 1 | 0 |
| CEP295   | chr11 | 93432482/T//C  | synonymous    | 1 | 0 |
| ENDOD1   | chr11 | 94823064/C//A  | synonymous    | 1 | 0 |
| ENDOD1   | chr11 | 94861718/C//T  | nonsynonymous | 1 | 0 |
| SESN3    | chr11 | 94923061/C//A  | nonsynonymous | 1 | 0 |
| ARHGAP42 | chr11 | 100784255/G//T | nonsynonymous | 1 | 0 |
| ARHGAP42 | chr11 | 100846899/G//T | nonsynonymous | 1 | 0 |



|          |       |                |               |   |   |
|----------|-------|----------------|---------------|---|---|
| PGR      | chr11 | 100998906/G//T | nonsynonymous | 1 | 0 |
| ANGPTL5  | chr11 | 101762050/G//A | nonsynonymous | 1 | 0 |
| ANGPTL5  | chr11 | 101762322/T//A | synonymous    | 1 | 0 |
| C11orf70 | chr11 | 101946741/G//C | synonymous    | 1 | 0 |
| MMP12    | chr11 | 102743681/G//A | synonymous    | 1 | 0 |
| DYNC2H1  | chr11 | 103006492/G//T | nonsynonymous | 1 | 0 |
| DYNC2H1  | chr11 | 103062832/C//G | nonsynonymous | 1 | 0 |
| PDGFD    | chr11 | 104034536/T//C | synonymous    | 1 | 0 |
| CASP12   | chr11 | 104762132/C//A | nonsynonymous | 1 | 0 |
| GRIA4    | chr11 | 105732794/G//T | nonsynonymous | 1 | 0 |
| GRIA4    | chr11 | 105789589/C//G | nonsynonymous | 1 | 0 |
| MSANTD4  | chr11 | 105880398/T//G | nonsynonymous | 1 | 0 |
| ALKBH8   | chr11 | 107393275/G//A | nonsynonymous | 1 | 0 |
| ATM      | chr11 | 108224518/C//G | nonsynonymous | 1 | 0 |
| DIXDC1   | chr11 | 111888609/G//T | nonsynonymous | 1 | 0 |
| HTR3A    | chr11 | 113846017/C//A | synonymous    | 1 | 0 |
| ZBTB16   | chr11 | 114121323/G//C | synonymous    | 1 | 0 |
| NXPE1    | chr11 | 114393059/C//A | synonymous    | 1 | 0 |
| PCSK7    | chr11 | 117097897/C//A | nonsynonymous | 1 | 0 |
| CEP164   | chr11 | 117233192/C//T | nonsynonymous | 1 | 0 |
| CEP164   | chr11 | 117261811/G//T | nonsynonymous | 1 | 0 |
| DSCAML1  | chr11 | 117302371/G//T | synonymous    | 1 | 0 |
| TTC36    | chr11 | 118398324/G//A | nonsynonymous | 1 | 0 |
| BCL9L    | chr11 | 118772545/C//A | nonsynonymous | 1 | 0 |
| DPAGT1   | chr11 | 118967976/T//C | nonsynonymous | 1 | 0 |
| HINFP    | chr11 | 119005064/C//T | synonymous    | 1 | 0 |
| CCDC153  | chr11 | 119061132/C//A | synonymous    | 1 | 0 |
| MFRP     | chr11 | 119216997/G//T | nonsynonymous | 1 | 0 |
| NECTIN1  | chr11 | 119549447/G//A | synonymous    | 1 | 0 |
| TRIM29   | chr11 | 120008359/C//A | synonymous    | 1 | 0 |
| TECTA    | chr11 | 120989065/G//T | nonsynonymous | 1 | 0 |
| SORL1    | chr11 | 121485676/G//C | nonsynonymous | 1 | 0 |
| GRAMD1B  | chr11 | 123448259/G//T | nonsynonymous | 1 | 0 |
| GRAMD1B  | chr11 | 123466731/A//G | nonsynonymous | 1 | 0 |
| OR6M1    | chr11 | 123676929/G//T | synonymous    | 1 | 0 |
| OR10G4   | chr11 | 123886301/T//A | nonsynonymous | 1 | 0 |
| OR10G9   | chr11 | 123894411/A//G | nonsynonymous | 1 | 0 |
| OR8G1    | chr11 | 124120552/G//T | nonsynonymous | 1 | 0 |
| OR8D1    | chr11 | 124179974/G//T | nonsynonymous | 1 | 0 |
| OR8D1    | chr11 | 124180066/A//T | synonymous    | 1 | 0 |
| OR8B12   | chr11 | 124413090/C//A | nonsynonymous | 1 | 0 |
| HEPACAM  | chr11 | 124793778/G//T | nonsynonymous | 1 | 0 |
| CCDC15   | chr11 | 124908487/A//G | nonsynonymous | 1 | 0 |
| PATE1    | chr11 | 125617639/G//A | nonsynonymous | 1 | 0 |
| PATE2    | chr11 | 125647880/A//T | nonsynonymous | 1 | 0 |
|          | chr11 | 128807380/A//T | synonymous    | 1 | 0 |
| ST14     | chr11 | 130067783/G//T | nonsynonymous | 1 | 0 |
| ST14     | chr11 | 130067792/T//A | nonsynonymous | 1 | 0 |
| ADAMTS8  | chr11 | 130278773/C//T | nonsynonymous | 1 | 0 |
| NTM      | chr11 | 132204979/G//T | nonsynonymous | 1 | 0 |
| GLB1L3   | chr11 | 134151949/G//T | synonymous    | 1 | 0 |
| GLB1L3   | chr11 | 134182264/G//T | nonsynonymous | 1 | 0 |
| GLB1L2   | chr11 | 134201992/A//T | nonsynonymous | 1 | 0 |
| LRTM2    | chr12 | 1943596/A//T   | synonymous    | 1 | 0 |
| CCND2    | chr12 | 4398124/G//T   | nonsynonymous | 1 | 0 |
| ANO2     | chr12 | 6031811/C//A   | nonsynonymous | 1 | 0 |
| VWF      | chr12 | 6105322/C//A   | nonsynonymous | 1 | 0 |
| NOP2     | chr12 | 6669641/T//G   | nonsynonymous | 1 | 0 |
| LPAR5    | chr12 | 6729130/T//C   | synonymous    | 1 | 0 |
| P3H3     | chr12 | 6940423/G//C   | synonymous    | 1 | 0 |
| P3H3     | chr12 | 6948587/A//T   | nonsynonymous | 1 | 0 |
| USP5     | chr12 | 6974360/G//C   | nonsynonymous | 1 | 0 |
| CD163L1  | chr12 | 7556166/C//G   | nonsynonymous | 1 | 0 |
| GDF3     | chr12 | 7842966/G//A   | synonymous    | 1 | 0 |
| RIMKLB   | chr12 | 8906546/G//T   | nonsynonymous | 1 | 0 |
| RIMKLB   | chr12 | 8926141/C//A   | nonsynonymous | 1 | 0 |
| PHC1     | chr12 | 9072434/A//G   | nonsynonymous | 1 | 0 |
| A2M      | chr12 | 9252033/C//T   | nonsynonymous | 1 | 0 |
| A2M      | chr12 | 9268386/G//T   | synonymous    | 1 | 0 |
| TAS2R19  | chr12 | 11174782/A//G  | nonsynonymous | 1 | 0 |

|              |       |                        |               |   |   |
|--------------|-------|------------------------|---------------|---|---|
| TAS2R42      | chr12 | 11338815/G//A          | synonymous    | 1 | 0 |
| CREBL2       | chr12 | 12788817/G//T          | nonsynonymous | 1 | 0 |
| CDKN1B       | chr12 | 12871149/G//A          | nonsynonymous | 1 | 0 |
| GUCY2C       | chr12 | 14849249/G//C          | nonsynonymous | 1 | 0 |
| PDE3A        | chr12 | 20522704/G//T          | synonymous    | 1 | 0 |
| SLCO1B1      | chr12 | 21350032/C//A          | nonsynonymous | 1 | 0 |
| SLCO1B1      | chr12 | 21355424/G//T          | nonsynonymous | 1 | 0 |
| SLCO1B1      | chr12 | 21370223/C//A          | synonymous    | 1 | 0 |
| CMAS         | chr12 | 22199282/G//T          | synonymous    | 1 | 0 |
| ST8SIA1      | chr12 | 22408213/C//G          | nonsynonymous | 1 | 0 |
| MRPS35       | chr12 | 27877032/G//T          | nonsynonymous | 1 | 0 |
| KLHL42       | chr12 | 27950851/G//A          | nonsynonymous | 1 | 0 |
|              | chr12 | 30829874/T//C          | synonymous    | 1 | 0 |
| DENND5B      | chr12 | 31579256/C//G          | nonsynonymous | 1 | 0 |
| H3F3C        | chr12 | 31944940/T//C          | nonsynonymous | 1 | 0 |
| PKP2         | chr12 | 32949213/A//G          | synonymous    | 1 | 0 |
| SYT10        | chr12 | 33535343/G//T          | nonsynonymous | 1 | 0 |
| SYT10        | chr12 | 33560162/G//T          | synonymous    | 1 | 0 |
| PDZRN4       | chr12 | 41967242/G//T          | nonsynonymous | 1 | 0 |
| ADAMTS20     | chr12 | 43822166/C//A          | nonsynonymous | 1 | 0 |
| PUS7L        | chr12 | 44148690/T//C          | nonsynonymous | 1 | 0 |
| ADCY6        | chr12 | 49165633/A//G          | nonsynonymous | 1 | 0 |
| KMT2D        | chr12 | 49420273/C//A          | nonsynonymous | 1 | 0 |
| KMT2D        | chr12 | 49427265/TTGCTGCTGC//T | nonsynonymous | 1 | 0 |
| KMT2D        | chr12 | 49443597/C//A          | synonymous    | 1 | 0 |
| LOC101927267 | chr12 | 49690606/G//A          | synonymous    | 1 | 0 |
| AQP6         | chr12 | 50369418/G//C          | nonsynonymous | 1 | 0 |
| SLC4A8       | chr12 | 51851227/C//A          | nonsynonymous | 1 | 0 |
| SCN8A        | chr12 | 52182495/G//T          | nonsynonymous | 1 | 0 |
| ACVRL1       | chr12 | 52306905/G//T          | synonymous    | 1 | 0 |
|              | chr12 | 52376534/G//C          | synonymous    | 1 | 0 |
| EIF4B        | chr12 | 53400213/A//G          | synonymous    | 1 | 0 |
| PDE1B        | chr12 | 54971053/G//T          | nonsynonymous | 1 | 0 |
| NEUROD4      | chr12 | 55420479/A//T          | nonsynonymous | 1 | 0 |
| OR6C70       | chr12 | 55863137/C//G          | synonymous    | 1 | 0 |
| OR6C68       | chr12 | 55886917/C//G          | nonsynonymous | 1 | 0 |
| SMARCC2      | chr12 | 56571855/C//T          | nonsynonymous | 1 | 0 |
| ATP5B        | chr12 | 57037360/C//A          | nonsynonymous | 1 | 0 |
| LRP1         | chr12 | 57606218/C//T          | synonymous    | 1 | 0 |
| R3HDM2       | chr12 | 57682815/C//A          | nonsynonymous | 1 | 0 |
| GLI1         | chr12 | 57863246/C//T          | synonymous    | 1 | 0 |
| MBD6         | chr12 | 57918764/T//C          | nonsynonymous | 1 | 0 |
| OS9          | chr12 | 58110298/G//A          | synonymous    | 1 | 0 |
| USP15        | chr12 | 62778029/A//T          | nonsynonymous | 1 | 0 |
| MON2         | chr12 | 62949796/G//T          | nonsynonymous | 1 | 0 |
| SRGAP1       | chr12 | 64456709/G//T          | nonsynonymous | 1 | 0 |
| LEMD3        | chr12 | 65639941/G//T          | nonsynonymous | 1 | 0 |
| MSRB3        | chr12 | 65857048/C//A          | synonymous    | 1 | 0 |
| HMGA2        | chr12 | 66221817/G//T          | nonsynonymous | 1 | 0 |
| PTPRB        | chr12 | 70980817/T//A          | nonsynonymous | 1 | 0 |
| PTPRR        | chr12 | 71078479/C//A          | synonymous    | 1 | 0 |
| TPH2         | chr12 | 72335408/G//T          | nonsynonymous | 1 | 0 |
| TPH2         | chr12 | 72338125/A//T          | nonsynonymous | 1 | 0 |
| TPH2         | chr12 | 72425355/AC//A         | nonsynonymous | 1 | 0 |
| TRHDE        | chr12 | 72969035/A//T          | nonsynonymous | 1 | 0 |
| KCNC2        | chr12 | 75444843/G//A          | synonymous    | 1 | 0 |
| KCNC2        | chr12 | 75601576/G//T          | nonsynonymous | 1 | 0 |
| NAV3         | chr12 | 78594354/G//A          | nonsynonymous | 1 | 0 |
| NAV3         | chr12 | 78598916/C//G          | nonsynonymous | 1 | 0 |
| OTOGL        | chr12 | 80672820/AG//A         | nonsynonymous | 1 | 0 |
| PTPRQ        | chr12 | 81072849/G//C          | synonymous    | 1 | 0 |
| MYF6         | chr12 | 81102695/G//T          | nonsynonymous | 1 | 0 |
| MYF6         | chr12 | 81102696/A//T          | nonsynonymous | 1 | 0 |
| PPFIA2       | chr12 | 81688615/G//T          | nonsynonymous | 1 | 0 |
| PPFIA2       | chr12 | 81769636/A//G          | nonsynonymous | 1 | 0 |
| METTL25      | chr12 | 82780637/G//T          | synonymous    | 1 | 0 |
| MGAT4C       | chr12 | 86373411/C//A          | nonsynonymous | 1 | 0 |
| CCER1        | chr12 | 91347974/G//T          | synonymous    | 1 | 0 |
| KERA         | chr12 | 91449666/A//G          | synonymous    | 1 | 0 |
| EEA1         | chr12 | 93221789/C//A          | nonsynonymous | 1 | 0 |

|            |       |                 |               |   |   |
|------------|-------|-----------------|---------------|---|---|
| VEZT       | chr12 | 95676371/C//T   | nonsynonymous | 1 | 0 |
| APAF1      | chr12 | 99102402/A//G   | nonsynonymous | 1 | 0 |
| GAS2L3     | chr12 | 101018272/A//T  | synonymous    | 1 | 0 |
| ANO4       | chr12 | 101442156/T//C  | nonsynonymous | 1 | 0 |
| ANO4       | chr12 | 101491493/A//T  | synonymous    | 1 | 0 |
| UTP20      | chr12 | 101731826/C//T  | synonymous    | 1 | 0 |
| SPIC       | chr12 | 101876609/C//G  | nonsynonymous | 1 | 0 |
| NUP37      | chr12 | 102468233/C//G  | nonsynonymous | 1 | 0 |
| ASCL1      | chr12 | 103352554/G//T  | nonsynonymous | 1 | 0 |
| C12orf42   | chr12 | 103696026/G//C  | nonsynonymous | 1 | 0 |
| STAB2      | chr12 | 104140399/C//G  | nonsynonymous | 1 | 0 |
| BTBD11     | chr12 | 108011206/G//C  | nonsynonymous | 1 | 0 |
| ASCL4      | chr12 | 108169066/C//A  | nonsynonymous | 1 | 0 |
| SART3      | chr12 | 108931945/G//C  | nonsynonymous | 1 | 0 |
|            | chr12 | 109185927/G//C  | synonymous    | 1 | 0 |
| MYO1H      | chr12 | 109849759/G//T  | nonsynonymous | 1 | 0 |
| ATXN2      | chr12 | 112037230/G//A  | nonsynonymous | 1 | 0 |
| ACAD10     | chr12 | 112150418/C//T  | synonymous    | 1 | 0 |
| RBM19      | chr12 | 114385265/G//A  | synonymous    | 1 | 0 |
| TBX3       | chr12 | 115110115/G//A  | synonymous    | 1 | 0 |
| TBX3       | chr12 | 115117302/G//C  | synonymous    | 1 | 0 |
| NOS1       | chr12 | 117657889/G//A  | synonymous    | 1 | 0 |
| NOS1       | chr12 | 117698385/C//A  | nonsynonymous | 1 | 0 |
| NOS1       | chr12 | 117768189/G//T  | nonsynonymous | 1 | 0 |
| NOS1       | chr12 | 117768678/G//T  | nonsynonymous | 1 | 0 |
| KSR2       | chr12 | 117922343/G//A  | synonymous    | 1 | 0 |
| SRRM4      | chr12 | 119552176/G//T  | synonymous    | 1 | 0 |
| CIT        | chr12 | 120128029/C//A  | nonsynonymous | 1 | 0 |
| PXN        | chr12 | 120651717/G//A  | synonymous    | 1 | 0 |
|            | chr12 | 121088351/G//A  | synonymous    | 1 | 0 |
| ACADS      | chr12 | 121163547/C//T  | synonymous    | 1 | 0 |
| ACADS      | chr12 | 121163551/C//T  | synonymous    | 1 | 0 |
| RNF34      | chr12 | 121861441/G//T  | synonymous    | 1 | 0 |
| PSMD9      | chr12 | 122326724/C//T  | synonymous    | 1 | 0 |
| MLXIP      | chr12 | 122614647/C//T  | nonsynonymous | 1 | 0 |
| CCDC62     | chr12 | 123270291/C//G  | nonsynonymous | 1 | 0 |
| PITPNM2    | chr12 | 123494534/C//A  | nonsynonymous | 1 | 0 |
| DDX55      | chr12 | 124086680/G//T  | synonymous    | 1 | 0 |
| TMEM132C   | chr12 | 128899735/C//A  | synonymous    | 1 | 0 |
| SLC15A4    | chr12 | 129283887/C//A  | nonsynonymous | 1 | 0 |
| TMEM132D   | chr12 | 130184999/C//CT | nonsynonymous | 1 | 0 |
| ADGRD1     | chr12 | 131490549/A//C  | nonsynonymous | 1 | 0 |
| ADGRD1     | chr12 | 131490566/G//A  | synonymous    | 1 | 0 |
| POLE       | chr12 | 133249241/C//A  | nonsynonymous | 1 | 0 |
| GOLGA3     | chr12 | 133393193/C//A  | nonsynonymous | 1 | 0 |
| ZNF268     | chr12 | 133781105/G//T  | nonsynonymous | 1 | 0 |
| LATS2      | chr13 | 21549504/C//G   | nonsynonymous | 1 | 0 |
| LNX2       | chr13 | 28130387/C//A   | nonsynonymous | 1 | 0 |
| STARD13    | chr13 | 33685942/C//T   | nonsynonymous | 1 | 0 |
| POSTN      | chr13 | 38160353/G//T   | nonsynonymous | 1 | 0 |
| FREM2      | chr13 | 39264676/G//T   | nonsynonymous | 1 | 0 |
| TNFSF11    | chr13 | 43148532/C//G   | nonsynonymous | 1 | 0 |
| SPERT      | chr13 | 46276932/G//C   | nonsynonymous | 1 | 0 |
| CAB39L     | chr13 | 49918344/C//T   | nonsynonymous | 1 | 0 |
| TRIM13     | chr13 | 50586977/C//G   | nonsynonymous | 1 | 0 |
| FAM124A    | chr13 | 51855302/C//A   | synonymous    | 1 | 0 |
| ATP7B      | chr13 | 52548881/T//A   | nonsynonymous | 1 | 0 |
| PCDH8      | chr13 | 53421216/C//T   | synonymous    | 1 | 0 |
| PCDH20     | chr13 | 61985597/T//A   | nonsynonymous | 1 | 0 |
| DIS3       | chr13 | 73347866/T//G   | nonsynonymous | 1 | 0 |
| SLITRK1    | chr13 | 84453499/G//C   | synonymous    | 1 | 0 |
| SLITRK1    | chr13 | 84454830/G//T   | synonymous    | 1 | 0 |
| UGGT2      | chr13 | 96592252/C//A   | nonsynonymous | 1 | 0 |
| HS6ST3     | chr13 | 97485380/G//T   | nonsynonymous | 1 | 0 |
| NALCN      | chr13 | 101755645/C//G  | nonsynonymous | 1 | 0 |
| TPP2       | chr13 | 103288034/A//T  | nonsynonymous | 1 | 0 |
| CCDC168    | chr13 | 103394128/C//A  | synonymous    | 1 | 0 |
| BIVM-ERCC5 | chr13 | 103510765/A//G  | synonymous    | 1 | 0 |
| PROZ       | chr13 | 113814337/C//A  | nonsynonymous | 1 | 0 |
| GRK1       | chr13 | 114322206/C//A  | nonsynonymous | 1 | 0 |

|           |       |                |               |   |   |
|-----------|-------|----------------|---------------|---|---|
| OR4K5     | chr14 | 20389206/C//A  | synonymous    | 1 | 0 |
| OR4K15    | chr14 | 20444472/T//A  | synonymous    | 1 | 0 |
| OR11H4    | chr14 | 20711804/C//A  | nonsynonymous | 1 | 0 |
| TEP1      | chr14 | 20849105/C//A  | nonsynonymous | 1 | 0 |
| APEX1     | chr14 | 20924985/C//T  | synonymous    | 1 | 0 |
| PNP       | chr14 | 20943396/G//T  | nonsynonymous | 1 | 0 |
| OR6S1     | chr14 | 21108975/G//T  | synonymous    | 1 | 0 |
| SALL2     | chr14 | 21993414/T//C  | nonsynonymous | 1 | 0 |
| OR10G3    | chr14 | 22038589/C//G  | nonsynonymous | 1 | 0 |
| AJUBA     | chr14 | 23442653/C//A  | nonsynonymous | 1 | 0 |
| CDH24     | chr14 | 23517630/C//A  | synonymous    | 1 | 0 |
| CDH24     | chr14 | 23524925/C//T  | synonymous    | 1 | 0 |
| SLC22A17  | chr14 | 23816933/C//A  | nonsynonymous | 1 | 0 |
| PSME1     | chr14 | 24607318/G//A  | nonsynonymous | 1 | 0 |
| EMC9      | chr14 | 24610492/C//T  | nonsynonymous | 1 | 0 |
| REC8      | chr14 | 24646668/C//A  | synonymous    | 1 | 0 |
| TGM1      | chr14 | 24724011/T//A  | synonymous    | 1 | 0 |
| PRKD1     | chr14 | 30046410/C//A  | synonymous    | 1 | 0 |
| HECTD1    | chr14 | 31618140/T//A  | nonsynonymous | 1 | 0 |
| AKAP6     | chr14 | 33291860/G//A  | nonsynonymous | 1 | 0 |
| NPAS3     | chr14 | 34029334/A//T  | nonsynonymous | 1 | 0 |
| MDGA2     | chr14 | 47426572/C//T  | synonymous    | 1 | 0 |
| KLHDC1    | chr14 | 50177065/C//T  | nonsynonymous | 1 | 0 |
| ABHD12B   | chr14 | 51345532/T//A  | nonsynonymous | 1 | 0 |
| TRIM9     | chr14 | 51444074/G//A  | synonymous    | 1 | 0 |
| PTGER2    | chr14 | 52781547/C//A  | nonsynonymous | 1 | 0 |
| CCDC175   | chr14 | 59988395/C//A  | nonsynonymous | 1 | 0 |
| RTN1      | chr14 | 60193636/C//A  | nonsynonymous | 1 | 0 |
| KCNH5     | chr14 | 63269087/G//T  | synonymous    | 1 | 0 |
| SYNE2     | chr14 | 64547323/G//A  | synonymous    | 1 | 0 |
| ESR2      | chr14 | 64701719/G//T  | nonsynonymous | 1 | 0 |
| ESR2      | chr14 | 64727259/G//T  | nonsynonymous | 1 | 0 |
| HSPA2     | chr14 | 65008481/T//C  | nonsynonymous | 1 | 0 |
| FUT8      | chr14 | 66028211/A//G  | synonymous    | 1 | 0 |
| ZFYVE26   | chr14 | 68222714/T//A  | nonsynonymous | 1 | 0 |
| ZFYVE26   | chr14 | 68268852/A//G  | nonsynonymous | 1 | 0 |
| ERH       | chr14 | 69861635/G//A  | synonymous    | 1 | 0 |
| SLC8A3    | chr14 | 70634521/C//T  | nonsynonymous | 1 | 0 |
| SIPA1L1   | chr14 | 72205845/A//G  | synonymous    | 1 | 0 |
| PROX2     | chr14 | 75329523/G//T  | nonsynonymous | 1 | 0 |
| ACYP1     | chr14 | 75530186/C//T  | nonsynonymous | 1 | 0 |
| FOS       | chr14 | 75746734/C//A  | nonsynonymous | 1 | 0 |
| NRXN3     | chr14 | 80164281/G//T  | nonsynonymous | 1 | 0 |
| SEL1L     | chr14 | 81993082/T//A  | nonsynonymous | 1 | 0 |
| PTPN21    | chr14 | 88945852/G//A  | synonymous    | 1 | 0 |
| UNC79     | chr14 | 94173301/T//A  | synonymous    | 1 | 0 |
| SERPINA12 | chr14 | 94955997/A//T  | nonsynonymous | 1 | 0 |
| SERPINA5  | chr14 | 95054061/C//A  | nonsynonymous | 1 | 0 |
| ATG2B     | chr14 | 96777955/T//C  | nonsynonymous | 1 | 0 |
| AK7       | chr14 | 96949469/G//T  | synonymous    | 1 | 0 |
| BCL11B    | chr14 | 99641393/C//A  | nonsynonymous | 1 | 0 |
| HHIPL1    | chr14 | 100134606/C//A | nonsynonymous | 1 | 0 |
| ANKRD9    | chr14 | 102973775/C//A | nonsynonymous | 1 | 0 |
| AHNAK2    | chr14 | 105411664/T//A | nonsynonymous | 1 | 0 |
| AHNAK2    | chr14 | 105415040/C//T | nonsynonymous | 1 | 0 |
| C14orf80  | chr14 | 105964992/G//T | synonymous    | 1 | 0 |
| NPAP1     | chr15 | 24924492/C//A  | synonymous    | 1 | 0 |
| HERC2     | chr15 | 28459400/C//A  | nonsynonymous | 1 | 0 |
| CHRM5     | chr15 | 34355377/G//T  | nonsynonymous | 1 | 0 |
| KNL1      | chr15 | 40914184/G//A  | synonymous    | 1 | 0 |
| MAP1A     | chr15 | 43818747/A//C  | nonsynonymous | 1 | 0 |
| EIF3J     | chr15 | 44852463/G//C  | nonsynonymous | 1 | 0 |
| DUOX2     | chr15 | 45389858/C//T  | nonsynonymous | 1 | 0 |
| SEMA6D    | chr15 | 48054389/G//T  | synonymous    | 1 | 0 |
| SLC12A1   | chr15 | 48499924/T//G  | nonsynonymous | 1 | 0 |
| FBN1      | chr15 | 48808560/C//G  | nonsynonymous | 1 | 0 |
| MYO5A     | chr15 | 52821026/C//A  | synonymous    | 1 | 0 |
| MYO1E     | chr15 | 59480345/G//GA | nonsynonymous | 1 | 0 |
| HERC1     | chr15 | 63958255/C//G  | synonymous    | 1 | 0 |
| HERC1     | chr15 | 64017564/C//A  | nonsynonymous | 1 | 0 |

|             |       |                |               |   |   |
|-------------|-------|----------------|---------------|---|---|
| CSNK1G1     | chr15 | 64506312/C//A  | nonsynonymous | 1 | 0 |
| TRIP4       | chr15 | 64701827/A//T  | nonsynonymous | 1 | 0 |
| ANKDD1A     | chr15 | 65209588/G//T  | nonsynonymous | 1 | 0 |
| IGDCC3      | chr15 | 65621762/G//C  | nonsynonymous | 1 | 0 |
| CALML4      | chr15 | 68489856/C//T  | nonsynonymous | 1 | 0 |
| SPESP1      | chr15 | 69238241/C//T  | nonsynonymous | 1 | 0 |
| KIF23       | chr15 | 69714356/G//T  | synonymous    | 1 | 0 |
| UACA        | chr15 | 70976750/C//A  | nonsynonymous | 1 | 0 |
| THSD4       | chr15 | 72057496/C//G  | synonymous    | 1 | 0 |
| HEXA        | chr15 | 72642949/C//T  | nonsynonymous | 1 | 0 |
| MAN2C1      | chr15 | 75658909/T//A  | nonsynonymous | 1 | 0 |
| PEAK1       | chr15 | 77473368/G//C  | nonsynonymous | 1 | 0 |
| SH2D7       | chr15 | 78390365/G//C  | nonsynonymous | 1 | 0 |
| KIAA1024    | chr15 | 79749899/C//A  | nonsynonymous | 1 | 0 |
| CEMIP       | chr15 | 81173261/C//A  | nonsynonymous | 1 | 0 |
| EFL1        | chr15 | 82530655/C//A  | nonsynonymous | 1 | 0 |
| BTBD1       | chr15 | 83735804/G//C  | nonsynonymous | 1 | 0 |
| ADAMTSL3    | chr15 | 84659837/G//A  | nonsynonymous | 1 | 0 |
| ZNF592      | chr15 | 85345616/C//G  | nonsynonymous | 1 | 0 |
| AKAP13      | chr15 | 86262351/A//C  | nonsynonymous | 1 | 0 |
| NTRK3       | chr15 | 88669501/C//A  | nonsynonymous | 1 | 0 |
| NTRK3       | chr15 | 88678614/C//A  | nonsynonymous | 1 | 0 |
| DET1        | chr15 | 89074850/T//A  | synonymous    | 1 | 0 |
| ACAN        | chr15 | 89398247/C//A  | nonsynonymous | 1 | 0 |
| HAPLN3      | chr15 | 89430551/G//A  | synonymous    | 1 | 0 |
| RHCG        | chr15 | 90020401/C//G  | synonymous    | 1 | 0 |
| BLM         | chr15 | 91306241/G//T  | nonsynonymous | 1 | 0 |
|             | chr15 | 96869512/G//T  | synonymous    | 1 | 0 |
| SPATA8      | chr15 | 97326950/C//G  | nonsynonymous | 1 | 0 |
| CERS3       | chr15 | 100942919/T//C | nonsynonymous | 1 | 0 |
| CHSY1       | chr15 | 101775343/C//T | nonsynonymous | 1 | 0 |
| POLR3K      | chr16 | 97503/C//A     | nonsynonymous | 1 | 0 |
| AXIN1       | chr16 | 359994/C//A    | synonymous    | 1 | 0 |
| RHOT2       | chr16 | 720248/G//T    | nonsynonymous | 1 | 0 |
| RHOT2       | chr16 | 723098/C//G    | nonsynonymous | 1 | 0 |
| RHOT2       | chr16 | 723608/G//T    | synonymous    | 1 | 0 |
| JMJD8       | chr16 | 734140/C//A    | synonymous    | 1 | 0 |
| FBXL16      | chr16 | 746768/C//T    | synonymous    | 1 | 0 |
| UNKL        | chr16 | 1421514/C//A   | synonymous    | 1 | 0 |
| UNKL        | chr16 | 1453234/C//A   | nonsynonymous | 1 | 0 |
| TBL3        | chr16 | 2027641/G//A   | synonymous    | 1 | 0 |
| PKD1        | chr16 | 2159393/C//A   | synonymous    | 1 | 0 |
| PKD1        | chr16 | 2161498/C//A   | nonsynonymous | 1 | 0 |
| ZNF213      | chr16 | 3190814/C//T   | synonymous    | 1 | 0 |
| SLX4        | chr16 | 3647660/G//A   | nonsynonymous | 1 | 0 |
| ADCY9       | chr16 | 4016883/G//C   | synonymous    | 1 | 0 |
| ADCY9       | chr16 | 4033442/C//A   | nonsynonymous | 1 | 0 |
| CORO7-PAM16 | chr16 | 4405287/C//G   | nonsynonymous | 1 | 0 |
| C16orf96    | chr16 | 4638321/G//T   | nonsynonymous | 1 | 0 |
| C16orf71    | chr16 | 4793068/G//T   | nonsynonymous | 1 | 0 |
| NAGPA-AS1   | chr16 | 5083946/C//T   | synonymous    | 1 | 0 |
| RBFOX1      | chr16 | 7629883/C//A   | synonymous    | 1 | 0 |
| PMM2        | chr16 | 8941684/G//T   | synonymous    | 1 | 0 |
| GSPT1       | chr16 | 11980389/G//C  | nonsynonymous | 1 | 0 |
| SNX29       | chr16 | 12450060/G//T  | nonsynonymous | 1 | 0 |
| SNX29       | chr16 | 12450130/G//T  | synonymous    | 1 | 0 |
| CPPED1      | chr16 | 12897565/T//A  | synonymous    | 1 | 0 |
| SHISA9      | chr16 | 12996146/G//A  | synonymous    | 1 | 0 |
| ERCC4       | chr16 | 14041558/G//T  | nonsynonymous | 1 | 0 |
| SMG1        | chr16 | 18858914/C//A  | nonsynonymous | 1 | 0 |
| GPR139      | chr16 | 20043223/G//T  | nonsynonymous | 1 | 0 |
| GP2         | chr16 | 20334225/C//A  | nonsynonymous | 1 | 0 |
| GP2         | chr16 | 20335256/G//T  | synonymous    | 1 | 0 |
| UMOD        | chr16 | 20352607/C//A  | synonymous    | 1 | 0 |
| ANKS4B      | chr16 | 21261347/C//A  | nonsynonymous | 1 | 0 |
| EEF2K       | chr16 | 22277761/G//C  | synonymous    | 1 | 0 |
| COG7        | chr16 | 23428424/C//G  | nonsynonymous | 1 | 0 |
| HS3ST4      | chr16 | 26147506/C//A  | nonsynonymous | 1 | 0 |
| KDM8        | chr16 | 27224957/G//A  | nonsynonymous | 1 | 0 |
| NSMCE1      | chr16 | 27268778/C//A  | synonymous    | 1 | 0 |

|           |       |                |               |   |   |
|-----------|-------|----------------|---------------|---|---|
| ATP2A1    | chr16 | 28909713/A/C   | nonsynonymous | 1 | 0 |
| SPNS1     | chr16 | 28992845/G/T   | nonsynonymous | 1 | 0 |
| SEZ6L2    | chr16 | 29900018/G//A  | synonymous    | 1 | 0 |
| ITGAL     | chr16 | 30484220/G//A  | nonsynonymous | 1 | 0 |
| ZNF688    | chr16 | 30582359/C//A  | nonsynonymous | 1 | 0 |
| SRCAP     | chr16 | 30734517/A/C   | nonsynonymous | 1 | 0 |
| SRCAP     | chr16 | 30734519/G//T  | nonsynonymous | 1 | 0 |
| SRCAP     | chr16 | 30747669/A//T  | nonsynonymous | 1 | 0 |
| SETD1A    | chr16 | 30976455/C//T  | synonymous    | 1 | 0 |
| ITGAX     | chr16 | 31366590/G//A  | synonymous    | 1 | 0 |
| ITGAD     | chr16 | 31419164/G//A  | synonymous    | 1 | 0 |
| C16orf58  | chr16 | 31508278/G//T  | synonymous    | 1 | 0 |
| VPS35     | chr16 | 46705610/C//A  | synonymous    | 1 | 0 |
| VPS35     | chr16 | 46708293/G//T  | nonsynonymous | 1 | 0 |
| MYLK3     | chr16 | 46766530/G//A  | nonsynonymous | 1 | 0 |
| LONP2     | chr16 | 48278443/G//T  | nonsynonymous | 1 | 0 |
| LONP2     | chr16 | 48296701/G//C  | nonsynonymous | 1 | 0 |
| ZNF423    | chr16 | 49671987/G//A  | nonsynonymous | 1 | 0 |
| ZNF423    | chr16 | 49672519/C//T  | nonsynonymous | 1 | 0 |
| NOD2      | chr16 | 50731185/G//T  | nonsynonymous | 1 | 0 |
| NOD2      | chr16 | 50745329/G//T  | nonsynonymous | 1 | 0 |
| SALL1     | chr16 | 51174769/GC//G | nonsynonymous | 1 | 0 |
| CHD9      | chr16 | 53319515/GA//G | nonsynonymous | 1 | 0 |
| RPGRIP1L  | chr16 | 53708937/G//A  | nonsynonymous | 1 | 0 |
| NUP93     | chr16 | 56865832/G//T  | synonymous    | 1 | 0 |
| NUP93     | chr16 | 56867263/G//T  | synonymous    | 1 | 0 |
| CX3CL1    | chr16 | 57416770/G//T  | nonsynonymous | 1 | 0 |
| ADGRG5    | chr16 | 57597045/C//T  | synonymous    | 1 | 0 |
| ADGRG1    | chr16 | 57685160/G//T  | nonsynonymous | 1 | 0 |
| DRC7      | chr16 | 57741396/G//T  | nonsynonymous | 1 | 0 |
| CNGB1     | chr16 | 57917989/G//T  | synonymous    | 1 | 0 |
| CNGB1     | chr16 | 57965695/G//C  | nonsynonymous | 1 | 0 |
| NDRG4     | chr16 | 58540381/T//A  | synonymous    | 1 | 0 |
| GOT2      | chr16 | 58750025/T//C  | synonymous    | 1 | 0 |
| GOT2      | chr16 | 58750581/T//C  | nonsynonymous | 1 | 0 |
| CDH16     | chr16 | 66950251/T//C  | nonsynonymous | 1 | 0 |
| FBXL8     | chr16 | 67197688/G//T  | nonsynonymous | 1 | 0 |
| EXOC3L1   | chr16 | 67218408/C//A  | synonymous    | 1 | 0 |
| PSMB10    | chr16 | 67969577/G//A  | nonsynonymous | 1 | 0 |
| NOB1      | chr16 | 69782838/T//C  | nonsynonymous | 1 | 0 |
| DDX19B    | chr16 | 70359501/G//C  | nonsynonymous | 1 | 0 |
| VAC14     | chr16 | 70778345/G//A  | synonymous    | 1 | 0 |
| HYDIN     | chr16 | 70893981/T//C  | nonsynonymous | 1 | 0 |
| HYDIN     | chr16 | 71054131/A//T  | synonymous    | 1 | 0 |
| CALB2     | chr16 | 71411620/G//T  | nonsynonymous | 1 | 0 |
| ZNF23     | chr16 | 71482490/C//A  | nonsynonymous | 1 | 0 |
| ZNF19     | chr16 | 71509461/G//A  | nonsynonymous | 1 | 0 |
| PHLPP2    | chr16 | 71712864/G//A  | synonymous    | 1 | 0 |
| PKD1L3    | chr16 | 72012187/C//A  | nonsynonymous | 1 | 0 |
| ZFH3      | chr16 | 72993519/C//A  | nonsynonymous | 1 | 0 |
| CFDP1     | chr16 | 75467340/C//A  | synonymous    | 1 | 0 |
|           | chr16 | 75678303/C//A  | synonymous    | 1 | 0 |
| CNTNAP4   | chr16 | 76350418/A//T  | nonsynonymous | 1 | 0 |
| CNTNAP4   | chr16 | 76482815/G//A  | synonymous    | 1 | 0 |
| VAT1L     | chr16 | 77822687/C//CA | nonsynonymous | 1 | 0 |
| C16orf46  | chr16 | 81097443/G//A  | nonsynonymous | 1 | 0 |
| CDH13     | chr16 | 83520145/T//A  | nonsynonymous | 1 | 0 |
| EMC8      | chr16 | 85822616/C//A  | nonsynonymous | 1 | 0 |
| PIEZO1    | chr16 | 88808793/G//A  | synonymous    | 1 | 0 |
| DPEP1     | chr16 | 89704240/A//T  | synonymous    | 1 | 0 |
| TCF25     | chr16 | 89973708/T//G  | nonsynonymous | 1 | 0 |
| RILP      | chr17 | 1552950/G//T   | nonsynonymous | 1 | 0 |
| OR1D2     | chr17 | 2995605/G//T   | nonsynonymous | 1 | 0 |
| OR3A3     | chr17 | 3324517/C//A   | nonsynonymous | 1 | 0 |
| TRPV3     | chr17 | 3432251/C//G   | synonymous    | 1 | 0 |
| ITGAE     | chr17 | 3680859/G//A   | nonsynonymous | 1 | 0 |
| PELP1     | chr17 | 4576658/C//A   | nonsynonymous | 1 | 0 |
| USP6      | chr17 | 5076110/C//A   | nonsynonymous | 1 | 0 |
| ZNF594    | chr17 | 5086176/G//A   | nonsynonymous | 1 | 0 |
| LOC728392 | chr17 | 5403911/G//C   | synonymous    | 1 | 0 |

|                |       |                |               |   |   |
|----------------|-------|----------------|---------------|---|---|
| NLRP1          | chr17 | 5462784/C//A   | nonsynonymous | 1 | 0 |
| BCL6B          | chr17 | 6930038/C//A   | nonsynonymous | 1 | 0 |
| ACADVL         | chr17 | 7125004/G//A   | synonymous    | 1 | 0 |
| TMEM256        | chr17 | 7307433/G//A   | synonymous    | 1 | 0 |
| POLR2A         | chr17 | 7417135/C//T   | nonsynonymous | 1 | 0 |
| TP53           | chr17 | 7577129/A//C   | nonsynonymous | 1 | 0 |
| TP53           | chr17 | 7578457/C//A   | nonsynonymous | 1 | 0 |
| DNAH2          | chr17 | 7643196/G//T   | nonsynonymous | 1 | 0 |
| CHD3           | chr17 | 7814274/C//T   | nonsynonymous | 1 | 0 |
| ALOX15B        | chr17 | 7942620/T//G   | synonymous    | 1 | 0 |
| ALOX15B        | chr17 | 7943235/C//A   | nonsynonymous | 1 | 0 |
| ALOX12B        | chr17 | 7980329/G//T   | synonymous    | 1 | 0 |
| AURKB          | chr17 | 8110631/C//A   | nonsynonymous | 1 | 0 |
| PIK3R6         | chr17 | 8730608/G//C   | nonsynonymous | 1 | 0 |
| MYH13          | chr17 | 10210265/G//T  | synonymous    | 1 | 0 |
| MYH13          | chr17 | 10250042/C//T  | synonymous    | 1 | 0 |
| MYH8           | chr17 | 10297646/C//A  | nonsynonymous | 1 | 0 |
| MYH8           | chr17 | 10323386/A//G  | synonymous    | 1 | 0 |
| MYH1           | chr17 | 10401056/C//G  | nonsynonymous | 1 | 0 |
| PIRT           | chr17 | 10728537/C//A  | synonymous    | 1 | 0 |
| ARHGAP44       | chr17 | 12893345/C//G  | synonymous    | 1 | 0 |
| TEKT3          | chr17 | 15231396/C//A  | synonymous    | 1 | 0 |
| UBB            | chr17 | 16285415/C//G  | nonsynonymous | 1 | 0 |
| UBB            | chr17 | 16285615/C//A  | nonsynonymous | 1 | 0 |
| FAM83G         | chr17 | 18881321/G//A  | nonsynonymous | 1 | 0 |
| NOS2           | chr17 | 26101295/G//C  | nonsynonymous | 1 | 0 |
| NOS2           | chr17 | 26107896/G//T  | nonsynonymous | 1 | 0 |
| VTN            | chr17 | 26696823/A//T  | nonsynonymous | 1 | 0 |
| ALDOC          | chr17 | 26901161/G//A  | synonymous    | 1 | 0 |
| TLCD1          | chr17 | 27051713/G//C  | nonsynonymous | 1 | 0 |
| SLC6A4         | chr17 | 28542646/G//A  | synonymous    | 1 | 0 |
| NF1            | chr17 | 29556863/C//A  | nonsynonymous | 1 | 0 |
| NF1            | chr17 | 29687566/C//T  | nonsynonymous | 1 | 0 |
| C17orf75       | chr17 | 30665233/A//T  | nonsynonymous | 1 | 0 |
| SLFN11         | chr17 | 33690306/T//C  | nonsynonymous | 1 | 0 |
| CCL23          | chr17 | 34340208/G//T  | synonymous    | 1 | 0 |
| ACACA          | chr17 | 35562762/T//A  | nonsynonymous | 1 | 0 |
| ARHGAP23       | chr17 | 36623553/G//T  | synonymous    | 1 | 0 |
| PLXDC1         | chr17 | 37235352/C//G  | synonymous    | 1 | 0 |
| KRT26          | chr17 | 38927963/T//A  | nonsynonymous | 1 | 0 |
| KRTAP16-1      | chr17 | 39464493/C//A  | nonsynonymous | 1 | 0 |
| KRT33A         | chr17 | 39504790/G//T  | nonsynonymous | 1 | 0 |
| KRT38          | chr17 | 39596984/G//T  | nonsynonymous | 1 | 0 |
| KRT36          | chr17 | 39646037/C//A  | nonsynonymous | 1 | 0 |
| KRT15          | chr17 | 39672192/T//A  | nonsynonymous | 1 | 0 |
| KRT15          | chr17 | 39672368/C//A  | nonsynonymous | 1 | 0 |
| KRT15          | chr17 | 39673158/G//C  | nonsynonymous | 1 | 0 |
| KRT16          | chr17 | 39766247/C//A  | nonsynonymous | 1 | 0 |
| GAST           | chr17 | 39871744/C//A  | nonsynonymous | 1 | 0 |
| CNP            | chr17 | 40129366/G//C  | synonymous    | 1 | 0 |
| DHX58          | chr17 | 40257080/C//A  | nonsynonymous | 1 | 0 |
| KCNH4          | chr17 | 40315650/G//A  | synonymous    | 1 | 0 |
| GHDC           | chr17 | 40342735/C//T  | nonsynonymous | 1 | 0 |
| PTRF           | chr17 | 40556818/C//A  | nonsynonymous | 1 | 0 |
| PTGES3L-AARSD1 | chr17 | 41131270/G//A  | nonsynonymous | 1 | 0 |
| MEOX1          | chr17 | 41738499/C//A  | nonsynonymous | 1 | 0 |
| NAGS           | chr17 | 42083516/G//T  | nonsynonymous | 1 | 0 |
| SLC4A1         | chr17 | 42328934/G//A  | synonymous    | 1 | 0 |
| SLC4A1         | chr17 | 42335414/C//A  | nonsynonymous | 1 | 0 |
| ITGA2B         | chr17 | 42457485/G//T  | nonsynonymous | 1 | 0 |
| DBF4B          | chr17 | 42828488/A//G  | nonsynonymous | 1 | 0 |
| ADAM11         | chr17 | 42847393/GA//G | nonsynonymous | 1 | 0 |
| KANSL1         | chr17 | 44115913/G//A  | synonymous    | 1 | 0 |
| B4GALNT2       | chr17 | 47237983/A//T  | nonsynonymous | 1 | 0 |
| SLC35B1        | chr17 | 47778773/G//C  | synonymous    | 1 | 0 |
| CACNA1G        | chr17 | 48653158/C//T  | synonymous    | 1 | 0 |
| KIF2B          | chr17 | 51901604/G//C  | nonsynonymous | 1 | 0 |
| NOG            | chr17 | 54671882/G//T  | nonsynonymous | 1 | 0 |
| TRIM25         | chr17 | 54969303/C//A  | nonsynonymous | 1 | 0 |
| MPO            | chr17 | 56353051/G//T  | nonsynonymous | 1 | 0 |

|          |       |                 |               |   |   |
|----------|-------|-----------------|---------------|---|---|
| TRIM37   | chr17 | 57078967/G//C   | nonsynonymous | 1 | 0 |
| TRIM37   | chr17 | 57139927/C//T   | nonsynonymous | 1 | 0 |
| TBX2     | chr17 | 59485543/C//A   | synonymous    | 1 | 0 |
| EFCAB3   | chr17 | 60491093/G//T   | nonsynonymous | 1 | 0 |
| TANC2    | chr17 | 61432714/G//A   | nonsynonymous | 1 | 0 |
| SCN4A    | chr17 | 62018656/G//C   | nonsynonymous | 1 | 0 |
| SCN4A    | chr17 | 62020340/G//T   | nonsynonymous | 1 | 0 |
| POLG2    | chr17 | 62474014/T//C   | nonsynonymous | 1 | 0 |
| ARSG     | chr17 | 66339930/T//C   | nonsynonymous | 1 | 0 |
| ABCA8    | chr17 | 66920894/G//A   | nonsynonymous | 1 | 0 |
| ABCA6    | chr17 | 67080565/G//A   | synonymous    | 1 | 0 |
| KCNJ2    | chr17 | 68172019/A//G   | nonsynonymous | 1 | 0 |
| SDK2     | chr17 | 71412066/T//C   | nonsynonymous | 1 | 0 |
|          | chr17 | 72245124/A//G   | synonymous    | 1 | 0 |
| KIF19    | chr17 | 72345392/G//T   | nonsynonymous | 1 | 0 |
| TMEM104  | chr17 | 72832699/G//A   | nonsynonymous | 1 | 0 |
| FADS6    | chr17 | 72877274/G//A   | nonsynonymous | 1 | 0 |
| OTOP3    | chr17 | 72942980/G//T   | nonsynonymous | 1 | 0 |
| HID1     | chr17 | 72947628/G//A   | synonymous    | 1 | 0 |
| HID1     | chr17 | 72960657/A//G   | nonsynonymous | 1 | 0 |
| CDR2L    | chr17 | 72998255/G//A   | synonymous    | 1 | 0 |
| NT5C     | chr17 | 73127749/G//A   | synonymous    | 1 | 0 |
| ZACN     | chr17 | 74075387/G//T   | synonymous    | 1 | 0 |
| JMJD6    | chr17 | 74716473/G//C   | nonsynonymous | 1 | 0 |
| TK1      | chr17 | 76170840/T//G   | nonsynonymous | 1 | 0 |
| PGS1     | chr17 | 76399952/A//G   | nonsynonymous | 1 | 0 |
| DNAH17   | chr17 | 76522754/G//C   | nonsynonymous | 1 | 0 |
| RPTOR    | chr17 | 78882720/C//T   | synonymous    | 1 | 0 |
| CEP131   | chr17 | 79180542/A//G   | nonsynonymous | 1 | 0 |
| TEPSIN   | chr17 | 79202762/G//A   | nonsynonymous | 1 | 0 |
| BAHCC1   | chr17 | 79425466/G//A   | nonsynonymous | 1 | 0 |
| SLC25A10 | chr17 | 79684060/A//T   | synonymous    | 1 | 0 |
| SLC25A10 | chr17 | 79684441/G//T   | nonsynonymous | 1 | 0 |
| P4HB     | chr17 | 79801796/T//A   | synonymous    | 1 | 0 |
|          | chr17 | 79857322/C//T   | synonymous    | 1 | 0 |
| FASN     | chr17 | 80050393/C//G   | nonsynonymous | 1 | 0 |
| CCDC57   | chr17 | 80151999/T//A   | nonsynonymous | 1 | 0 |
| NARF     | chr17 | 80430441/G//T   | synonymous    | 1 | 0 |
| EPB41L3  | chr18 | 5416317/T//C    | nonsynonymous | 1 | 0 |
| MTCL1    | chr18 | 8826213/G//A    | nonsynonymous | 1 | 0 |
| RAB31    | chr18 | 9859237/C//T    | nonsynonymous | 1 | 0 |
| PIEZO2   | chr18 | 10672698/C//A   | synonymous    | 1 | 0 |
| ANKRD30B | chr18 | 14752838/G//T   | nonsynonymous | 1 | 0 |
| GAREM1   | chr18 | 29848246/T//A   | nonsynonymous | 1 | 0 |
| ASXL3    | chr18 | 31326400/C//T   | synonymous    | 1 | 0 |
| NOL4     | chr18 | 31709981/C//A   | nonsynonymous | 1 | 0 |
| C18orf25 | chr18 | 43820053/G//T   | synonymous    | 1 | 0 |
| TMX3     | chr18 | 66350192/C//A   | nonsynonymous | 1 | 0 |
| ZNF407   | chr18 | 72632570/G//A   | nonsynonymous | 1 | 0 |
| CTDP1    | chr18 | 77477977/C//T   | nonsynonymous | 1 | 0 |
| ATP8B3   | chr19 | 1790823/C//T    | nonsynonymous | 1 | 0 |
| ATP8B3   | chr19 | 1805386/C//A    | nonsynonymous | 1 | 0 |
| LMNB2    | chr19 | 2434320/C//A    | nonsynonymous | 1 | 0 |
| MATK     | chr19 | 3778297/G//A    | nonsynonymous | 1 | 0 |
| ANKRD24  | chr19 | 4216281/G//T    | nonsynonymous | 1 | 0 |
| SAFB2    | chr19 | 5610094/C//A    | nonsynonymous | 1 | 0 |
| DUS3L    | chr19 | 5787321/G//A    | nonsynonymous | 1 | 0 |
| ACER1    | chr19 | 6312203/A//G    | nonsynonymous | 1 | 0 |
| KHSRP    | chr19 | 6415383/C//T    | synonymous    | 1 | 0 |
| VAV1     | chr19 | 6854109/G//T    | synonymous    | 1 | 0 |
| ADGRE1   | chr19 | 6902018/A//T    | nonsynonymous | 1 | 0 |
| MCEMP1   | chr19 | 7742534/C//A    | nonsynonymous | 1 | 0 |
| PRAM1    | chr19 | 8563430/C//A    | nonsynonymous | 1 | 0 |
| MUC16    | chr19 | 9014569/A//G    | synonymous    | 1 | 0 |
| MUC16    | chr19 | 9046500/T//A    | nonsynonymous | 1 | 0 |
| ZNF317   | chr19 | 9268657/G//T    | synonymous    | 1 | 0 |
| ZNF426   | chr19 | 9639182/G//A    | synonymous    | 1 | 0 |
| ZNF426   | chr19 | 9641719/T//A    | nonsynonymous | 1 | 0 |
| OLFM2    | chr19 | 9968428/C//CGGA | nonsynonymous | 1 | 0 |
| CNN1     | chr19 | 11660410/G//T   | nonsynonymous | 1 | 0 |



|          |       |               |               |   |   |
|----------|-------|---------------|---------------|---|---|
| CC2D1A   | chr19 | 14023138/C//A | nonsynonymous | 1 | 0 |
| UNC13A   | chr19 | 17735760/G//T | nonsynonymous | 1 | 0 |
| FCHO1    | chr19 | 17898550/G//T | nonsynonymous | 1 | 0 |
| KIAA1683 | chr19 | 18368384/G//A | nonsynonymous | 1 | 0 |
| COMP     | chr19 | 18898363/C//T | nonsynonymous | 1 | 0 |
| COMP     | chr19 | 18899479/G//C | nonsynonymous | 1 | 0 |
| CERS1    | chr19 | 18991133/C//A | synonymous    | 1 | 0 |
| MAU2     | chr19 | 19456183/G//T | synonymous    | 1 | 0 |
| ZNF90    | chr19 | 20229627/G//T | nonsynonymous | 1 | 0 |
| ZNF85    | chr19 | 21132012/A//C | nonsynonymous | 1 | 0 |
| ZNF100   | chr19 | 21909418/C//A | synonymous    | 1 | 0 |
| ZNF100   | chr19 | 21909492/T//A | nonsynonymous | 1 | 0 |
| ZNF729   | chr19 | 22498184/T//C | synonymous    | 1 | 0 |
| ZNF536   | chr19 | 30934860/C//A | nonsynonymous | 1 | 0 |
| ZNF536   | chr19 | 30935811/G//T | nonsynonymous | 1 | 0 |
| TSHZ3    | chr19 | 31768674/C//A | synonymous    | 1 | 0 |
| ANKRD27  | chr19 | 33095286/C//A | synonymous    | 1 | 0 |
| LRP3     | chr19 | 33697950/C//T | synonymous    | 1 | 0 |
| SLC7A10  | chr19 | 33702142/G//T | nonsynonymous | 1 | 0 |
| KIAA0355 | chr19 | 34791609/G//T | nonsynonymous | 1 | 0 |
| CD22     | chr19 | 35827175/G//C | nonsynonymous | 1 | 0 |
| ATP4A    | chr19 | 36049533/G//A | synonymous    | 1 | 0 |
| PRODH2   | chr19 | 36298003/G//C | synonymous    | 1 | 0 |
| KIRREL2  | chr19 | 36351545/C//G | nonsynonymous | 1 | 0 |
| ZNF382   | chr19 | 37118408/G//A | nonsynonymous | 1 | 0 |
| ZNF568   | chr19 | 37427656/G//T | synonymous    | 1 | 0 |
| ZNF585A  | chr19 | 37643669/C//A | nonsynonymous | 1 | 0 |
| ZNF571   | chr19 | 38055398/C//G | synonymous    | 1 | 0 |
| ZNF540   | chr19 | 38091998/A//G | nonsynonymous | 1 | 0 |
| ZNF573   | chr19 | 38260735/C//T | nonsynonymous | 1 | 0 |
| WDR87    | chr19 | 38376695/C//A | nonsynonymous | 1 | 0 |
| WDR87    | chr19 | 38377985/G//A | nonsynonymous | 1 | 0 |
| WDR87    | chr19 | 38380317/G//T | nonsynonymous | 1 | 0 |
| SIPA1L3  | chr19 | 38572331/G//A | synonymous    | 1 | 0 |
| CATSPERG | chr19 | 38860880/G//T | synonymous    | 1 | 0 |
| RYR1     | chr19 | 38949779/G//A | synonymous    | 1 | 0 |
| RYR1     | chr19 | 39008114/G//T | synonymous    | 1 | 0 |
| RYR1     | chr19 | 39058427/A//T | nonsynonymous | 1 | 0 |
| ECH1     | chr19 | 39322368/C//T | synonymous    | 1 | 0 |
| SIRT2    | chr19 | 39374274/C//T | nonsynonymous | 1 | 0 |
| FBXO27   | chr19 | 39521668/C//A | nonsynonymous | 1 | 0 |
| PAK4     | chr19 | 39660254/G//C | nonsynonymous | 1 | 0 |
| IFNL3    | chr19 | 39734529/C//A | nonsynonymous | 1 | 0 |
| ZFP36    | chr19 | 39899149/C//G | nonsynonymous | 1 | 0 |
| PLEKHG2  | chr19 | 39914609/C//A | nonsynonymous | 1 | 0 |
| FCGBP    | chr19 | 40364190/C//G | nonsynonymous | 1 | 0 |
| C19orf47 | chr19 | 40842065/C//A | synonymous    | 1 | 0 |
| HIPK4    | chr19 | 40887028/C//T | synonymous    | 1 | 0 |
| SPTBN4   | chr19 | 41009752/G//C | nonsynonymous | 1 | 0 |
| SPTBN4   | chr19 | 41019335/C//A | nonsynonymous | 1 | 0 |
| HNRNPUL1 | chr19 | 41800316/C//A | nonsynonymous | 1 | 0 |
| ZNF574   | chr19 | 42583753/G//T | nonsynonymous | 1 | 0 |
| CIC      | chr19 | 42797947/G//T | synonymous    | 1 | 0 |
| PSG1     | chr19 | 43375931/G//T | nonsynonymous | 1 | 0 |
| PSG11    | chr19 | 43529054/C//A | nonsynonymous | 1 | 0 |
| ZNF225   | chr19 | 44619934/G//C | synonymous    | 1 | 0 |
| ZNF226   | chr19 | 44680409/G//A | nonsynonymous | 1 | 0 |
| ZNF233   | chr19 | 44777937/G//A | nonsynonymous | 1 | 0 |
| ZNF235   | chr19 | 44791615/T//A | nonsynonymous | 1 | 0 |
| ZNF229   | chr19 | 44933116/C//G | nonsynonymous | 1 | 0 |
| ZNF229   | chr19 | 44933153/C//A | synonymous    | 1 | 0 |
| PVR      | chr19 | 45150826/C//G | nonsynonymous | 1 | 0 |
| TOMM40   | chr19 | 45396092/A//T | nonsynonymous | 1 | 0 |
| APOE     | chr19 | 45412283/C//T | nonsynonymous | 1 | 0 |
| CLASRP   | chr19 | 45567877/G//T | synonymous    | 1 | 0 |
| PPM1N    | chr19 | 46001921/G//A | nonsynonymous | 1 | 0 |
| PPM1N    | chr19 | 46002668/A//G | nonsynonymous | 1 | 0 |
| SNRPD2   | chr19 | 46195241/C//T | synonymous    | 1 | 0 |
| FBXO46   | chr19 | 46215940/G//A | nonsynonymous | 1 | 0 |
| DMWD     | chr19 | 46289299/G//T | synonymous    | 1 | 0 |

|          |       |               |               |   |   |
|----------|-------|---------------|---------------|---|---|
| HIF3A    | chr19 | 46811544/G//T | nonsynonymous | 1 | 0 |
| PRKD2    | chr19 | 47204141/C//A | nonsynonymous | 1 | 0 |
| AP2S1    | chr19 | 47341683/C//A | synonymous    | 1 | 0 |
| ARHGAP35 | chr19 | 47440562/C//T | synonymous    | 1 | 0 |
| C5AR2    | chr19 | 47844084/T//A | nonsynonymous | 1 | 0 |
| LIG1     | chr19 | 48631262/C//A | nonsynonymous | 1 | 0 |
| KDELR1   | chr19 | 48886536/G//T | synonymous    | 1 | 0 |
| SULT2B1  | chr19 | 49090537/C//T | nonsynonymous | 1 | 0 |
| SULT2B1  | chr19 | 49094890/C//A | synonymous    | 1 | 0 |
| PPP1R15A | chr19 | 49377789/G//T | synonymous    | 1 | 0 |
| TRPM4    | chr19 | 49714531/G//T | synonymous    | 1 | 0 |
| BCL2L12  | chr19 | 50173593/G//A | nonsynonymous | 1 | 0 |
| TSKS     | chr19 | 50243091/C//T | nonsynonymous | 1 | 0 |
| TSKS     | chr19 | 50247621/C//T | nonsynonymous | 1 | 0 |
| MED25    | chr19 | 50340195/C//T | synonymous    | 1 | 0 |
| PTOV1    | chr19 | 50363310/C//T | nonsynonymous | 1 | 0 |
| VRK3     | chr19 | 50511078/C//A | nonsynonymous | 1 | 0 |
| ZNF473   | chr19 | 50550187/C//G | synonymous    | 1 | 0 |
| EMC10    | chr19 | 50979826/A//T | nonsynonymous | 1 | 0 |
| SHANK1   | chr19 | 51192118/C//A | nonsynonymous | 1 | 0 |
| CLEC11A  | chr19 | 51228421/C//G | synonymous    | 1 | 0 |
| KLK6     | chr19 | 51465134/C//T | nonsynonymous | 1 | 0 |
| SIGLEC7  | chr19 | 51645629/G//A | nonsynonymous | 1 | 0 |
| CD33     | chr19 | 51729163/C//A | nonsynonymous | 1 | 0 |
| IGLON5   | chr19 | 51827090/C//A | synonymous    | 1 | 0 |
| ETFB     | chr19 | 51848526/C//A | nonsynonymous | 1 | 0 |
| LIM2     | chr19 | 51890643/G//T | nonsynonymous | 1 | 0 |
| CEACAM18 | chr19 | 51983775/G//C | nonsynonymous | 1 | 0 |
| SIGLEC6  | chr19 | 52034422/C//G | nonsynonymous | 1 | 0 |
| FPR3     | chr19 | 52327613/C//G | synonymous    | 1 | 0 |
| ZNF350   | chr19 | 52469067/T//A | nonsynonymous | 1 | 0 |
| ZNF578   | chr19 | 53008021/C//A | nonsynonymous | 1 | 0 |
| ZNF578   | chr19 | 53014906/G//C | nonsynonymous | 1 | 0 |
| ZNF808   | chr19 | 53058407/G//A | synonymous    | 1 | 0 |
| ZNF808   | chr19 | 53058636/G//T | nonsynonymous | 1 | 0 |
| ERVV-1   | chr19 | 53518663/G//C | synonymous    | 1 | 0 |
| ZNF160   | chr19 | 53578372/G//A | nonsynonymous | 1 | 0 |
| ZNF665   | chr19 | 53667950/T//A | nonsynonymous | 1 | 0 |
| ZNF665   | chr19 | 53668867/A//G | synonymous    | 1 | 0 |
| VN1R2    | chr19 | 53762662/G//T | nonsynonymous | 1 | 0 |
| BIRC8    | chr19 | 53792999/C//A | nonsynonymous | 1 | 0 |
| ZNF845   | chr19 | 53856308/A//G | nonsynonymous | 1 | 0 |
| LILRB3   | chr19 | 54721227/C//G | nonsynonymous | 1 | 0 |
| LILRA2   | chr19 | 55085566/C//T | nonsynonymous | 1 | 0 |
| LILRA2   | chr19 | 55086222/C//G | nonsynonymous | 1 | 0 |
| LILRA2   | chr19 | 55086840/A//T | nonsynonymous | 1 | 0 |
| LILRB1   | chr19 | 55143550/C//A | nonsynonymous | 1 | 0 |
| LILRB1   | chr19 | 55148182/G//T | nonsynonymous | 1 | 0 |
| KIR2DL3  | chr19 | 55253486/C//G | nonsynonymous | 1 | 0 |
| KIR2DS4  | chr19 | 55350998/A//T | synonymous    | 1 | 0 |
| KIR3DL2  | chr19 | 55378172/G//A | nonsynonymous | 1 | 0 |
| NCR1     | chr19 | 55420655/C//T | nonsynonymous | 1 | 0 |
| GP6      | chr19 | 55526059/C//T | synonymous    | 1 | 0 |
| BRSK1    | chr19 | 55814070/G//T | nonsynonymous | 1 | 0 |
| ISOC2    | chr19 | 55964713/G//A | synonymous    | 1 | 0 |
| SSC5D    | chr19 | 56001678/T//A | synonymous    | 1 | 0 |
| SSC5D    | chr19 | 56005047/G//T | synonymous    | 1 | 0 |
| SBK2     | chr19 | 56041362/G//T | nonsynonymous | 1 | 0 |
| ZNF865   | chr19 | 56127165/C//G | synonymous    | 1 | 0 |
| EPN1     | chr19 | 56203176/A//T | synonymous    | 1 | 0 |
| NLRP9    | chr19 | 56249456/C//G | synonymous    | 1 | 0 |
| NLRP8    | chr19 | 56485189/G//T | nonsynonymous | 1 | 0 |
| NLRP5    | chr19 | 56538626/T//A | nonsynonymous | 1 | 0 |
| NLRP5    | chr19 | 56538871/C//A | synonymous    | 1 | 0 |
| NLRP5    | chr19 | 56544913/G//C | nonsynonymous | 1 | 0 |
| NLRP5    | chr19 | 56544917/T//A | nonsynonymous | 1 | 0 |
| ZNF470   | chr19 | 57088611/G//T | nonsynonymous | 1 | 0 |
| ZNF71    | chr19 | 57132653/G//T | synonymous    | 1 | 0 |
| ZIM2     | chr19 | 57286819/G//T | nonsynonymous | 1 | 0 |
| PEG3     | chr19 | 57326681/G//T | nonsynonymous | 1 | 0 |

|           |       |               |               |   |   |
|-----------|-------|---------------|---------------|---|---|
| DUXA      | chr19 | 57670636/T//C | nonsynonymous | 1 | 0 |
| ZNF805    | chr19 | 57752269/G//T | nonsynonymous | 1 | 0 |
| ZNF548    | chr19 | 57908467/G//T | nonsynonymous | 1 | 0 |
| ZNF416    | chr19 | 58084083/G//C | nonsynonymous | 1 | 0 |
| ZNF134    | chr19 | 58130779/G//T | nonsynonymous | 1 | 0 |
| ZSCAN4    | chr19 | 58187725/C//G | nonsynonymous | 1 | 0 |
| ZSCAN4    | chr19 | 58189279/C//G | synonymous    | 1 | 0 |
| ZNF776    | chr19 | 58265601/G//T | nonsynonymous | 1 | 0 |
| ZNF606    | chr19 | 58499575/C//A | nonsynonymous | 1 | 0 |
|           | chr19 | 58574942/C//A | synonymous    | 1 | 0 |
| ZSCAN18   | chr19 | 58598731/C//A | nonsynonymous | 1 | 0 |
| ZNF584    | chr19 | 58929136/G//T | nonsynonymous | 1 | 0 |
| MZF1      | chr19 | 59074759/G//C | synonymous    | 1 | 0 |
| ATRN      | chr20 | 3526464/A//T  | nonsynonymous | 1 | 0 |
| SPEF1     | chr20 | 3758745/C//T  | synonymous    | 1 | 0 |
| CENPB     | chr20 | 3766334/T//A  | nonsynonymous | 1 | 0 |
| RASSF2    | chr20 | 4781654/G//A  | nonsynonymous | 1 | 0 |
| LRRN4     | chr20 | 6033059/G//A  | synonymous    | 1 | 0 |
| HAO1      | chr20 | 7894876/G//C  | nonsynonymous | 1 | 0 |
| SNAP25    | chr20 | 10273910/G//C | nonsynonymous | 1 | 0 |
| CFAP61    | chr20 | 20055873/C//T | nonsynonymous | 1 | 0 |
| RALGAPA2  | chr20 | 20582413/T//A | nonsynonymous | 1 | 0 |
| NKX2-4    | chr20 | 21376969/C//A | synonymous    | 1 | 0 |
| PAX1      | chr20 | 21687565/C//A | nonsynonymous | 1 | 0 |
| DEFB121   | chr20 | 29993950/C//T | synonymous    | 1 | 0 |
| TTLL9     | chr20 | 30527076/A//G | synonymous    | 1 | 0 |
| HCK       | chr20 | 30686924/G//C | nonsynonymous | 1 | 0 |
| KIF3B     | chr20 | 30897727/G//T | synonymous    | 1 | 0 |
| MAPRE1    | chr20 | 31424498/A//T | nonsynonymous | 1 | 0 |
| PXMP4     | chr20 | 32298566/A//G | synonymous    | 1 | 0 |
| DYNLRB1   | chr20 | 33104259/C//T | synonymous    | 1 | 0 |
| NDRG3     | chr20 | 35294750/G//A | nonsynonymous | 1 | 0 |
| DSN1      | chr20 | 35395237/A//T | nonsynonymous | 1 | 0 |
| KIAA1755  | chr20 | 36869658/C//T | nonsynonymous | 1 | 0 |
| SLC32A1   | chr20 | 37356570/C//A | nonsynonymous | 1 | 0 |
| PPP1R16B  | chr20 | 37464500/C//G | synonymous    | 1 | 0 |
| ACOT8     | chr20 | 44472211/G//A | nonsynonymous | 1 | 0 |
| ZNF335    | chr20 | 44589137/T//C | nonsynonymous | 1 | 0 |
| SLC12A5   | chr20 | 44664035/C//A | synonymous    | 1 | 0 |
| SLC12A5   | chr20 | 44664458/C//A | nonsynonymous | 1 | 0 |
| TP53RK    | chr20 | 45315488/C//T | synonymous    | 1 | 0 |
| ZMYND8    | chr20 | 45875147/G//C | nonsynonymous | 1 | 0 |
| PREX1     | chr20 | 47248858/C//T | nonsynonymous | 1 | 0 |
| PREX1     | chr20 | 47351188/C//A | nonsynonymous | 1 | 0 |
| DDX27     | chr20 | 47835894/T//A | nonsynonymous | 1 | 0 |
| KCNB1     | chr20 | 48098594/C//A | nonsynonymous | 1 | 0 |
|           | chr20 | 48732129/G//A | synonymous    | 1 | 0 |
| NFATC2    | chr20 | 50139984/C//G | nonsynonymous | 1 | 0 |
| PFDN4     | chr20 | 52824668/G//T | synonymous    | 1 | 0 |
| DOK5      | chr20 | 53092396/G//T | synonymous    | 1 | 0 |
| ZBP1      | chr20 | 56179629/C//G | nonsynonymous | 1 | 0 |
| SYCP2     | chr20 | 58496366/C//A | nonsynonymous | 1 | 0 |
| LAMA5     | chr20 | 60886351/T//A | nonsynonymous | 1 | 0 |
| COL20A1   | chr20 | 61940835/C//A | nonsynonymous | 1 | 0 |
| CHRNA4    | chr20 | 61981435/T//G | nonsynonymous | 1 | 0 |
| KCNQ2     | chr20 | 62038668/T//G | nonsynonymous | 1 | 0 |
| KCNQ2     | chr20 | 62044826/G//A | synonymous    | 1 | 0 |
| KCNQ2     | chr20 | 62078168/G//T | nonsynonymous | 1 | 0 |
| POTED     | chr21 | 14982850/T//A | nonsynonymous | 1 | 0 |
| SAMSN1    | chr21 | 15872855/G//C | nonsynonymous | 1 | 0 |
| BTG3      | chr21 | 18977207/G//A | synonymous    | 1 | 0 |
| ATP5J     | chr21 | 27096928/C//A | synonymous    | 1 | 0 |
| KRTAP25-1 | chr21 | 31661555/G//T | nonsynonymous | 1 | 0 |
| KRTAP27-1 | chr21 | 31709654/A//G | synonymous    | 1 | 0 |
| ITSN1     | chr21 | 35147320/C//G | nonsynonymous | 1 | 0 |
| B3GALT5   | chr21 | 41033164/G//T | synonymous    | 1 | 0 |
| DSCAM     | chr21 | 41684032/G//C | nonsynonymous | 1 | 0 |
| SPATC1L   | chr21 | 47588375/T//A | nonsynonymous | 1 | 0 |
| DIP2A     | chr21 | 47918488/A//G | synonymous    | 1 | 0 |
| CCT8L2    | chr22 | 17073012/G//C | synonymous    | 1 | 0 |

|          |       |                |               |   |   |
|----------|-------|----------------|---------------|---|---|
| CLTCL1   | chr22 | 19209109/C//A  | nonsynonymous | 1 | 0 |
| CLTCL1   | chr22 | 19217462/G//A  | nonsynonymous | 1 | 0 |
| CLTCL1   | chr22 | 19220999/C//A  | synonymous    | 1 | 0 |
| ARVCF    | chr22 | 19968810/C//A  | nonsynonymous | 1 | 0 |
| RSPH14   | chr22 | 23482439/G//T  | nonsynonymous | 1 | 0 |
| PIWIL3   | chr22 | 25115777/A//T  | nonsynonymous | 1 | 0 |
| MYO18B   | chr22 | 26242210/T//A  | nonsynonymous | 1 | 0 |
| SEZ6L    | chr22 | 26707791/C//T  | nonsynonymous | 1 | 0 |
| SEZ6L    | chr22 | 26747144/T//C  | nonsynonymous | 1 | 0 |
| MN1      | chr22 | 28193128/A//T  | nonsynonymous | 1 | 0 |
| MN1      | chr22 | 28196499/G//C  | synonymous    | 1 | 0 |
| RHBDD3   | chr22 | 29656024/G//A  | synonymous    | 1 | 0 |
| NEFH     | chr22 | 29879383/G//T  | synonymous    | 1 | 0 |
| DEPDC5   | chr22 | 32188751/C//T  | nonsynonymous | 1 | 0 |
| C22orf42 | chr22 | 32555006/A//G  | nonsynonymous | 1 | 0 |
| TOM1     | chr22 | 35713940/C//T  | synonymous    | 1 | 0 |
| MYH9     | chr22 | 36678779/C//A  | nonsynonymous | 1 | 0 |
| TMPRSS6  | chr22 | 37465288/G//C  | synonymous    | 1 | 0 |
| MFNG     | chr22 | 37870605/A//G  | nonsynonymous | 1 | 0 |
| KCNJ4    | chr22 | 38823589/C//A  | nonsynonymous | 1 | 0 |
| APOBEC3D | chr22 | 39421288/G//A  | nonsynonymous | 1 | 0 |
| SCUBE1   | chr22 | 43716000/A//T  | nonsynonymous | 1 | 0 |
| PHF21B   | chr22 | 45279153/G//A  | nonsynonymous | 1 | 0 |
| BRD1     | chr22 | 50217497/C//A  | nonsynonymous | 1 | 0 |
| GYG2     | chrX  | 2779695/G//T   | nonsynonymous | 1 | 0 |
| ARSH     | chrX  | 2936637/C//A   | nonsynonymous | 1 | 0 |
| SHROOM2  | chrX  | 9864211/A//T   | nonsynonymous | 1 | 0 |
| ADGRG2   | chrX  | 19032183/C//G  | nonsynonymous | 1 | 0 |
| MAP7D2   | chrX  | 20030552/C//T  | nonsynonymous | 1 | 0 |
| ZNF645   | chrX  | 22291168/C//A  | nonsynonymous | 1 | 0 |
| MAGEB3   | chrX  | 30254540/G//C  | nonsynonymous | 1 | 0 |
| CXorf21  | chrX  | 30577936/T//A  | nonsynonymous | 1 | 0 |
| DMD      | chrX  | 32407663/C//A  | nonsynonymous | 1 | 0 |
| DMD      | chrX  | 32486681/G//T  | synonymous    | 1 | 0 |
| FAM47A   | chrX  | 34150245/C//G  | nonsynonymous | 1 | 0 |
| FAM47A   | chrX  | 34150301/T//A  | nonsynonymous | 1 | 0 |
| FAM47A   | chrX  | 34150304/G//C  | nonsynonymous | 1 | 0 |
| UXT      | chrX  | 47517043/G//A  | synonymous    | 1 | 0 |
| SMC1A    | chrX  | 53441703/C//T  | synonymous    | 1 | 0 |
| HUWE1    | chrX  | 53610797/G//A  | synonymous    | 1 | 0 |
| FAM120C  | chrX  | 54106712/C//G  | nonsynonymous | 1 | 0 |
| ZC4H2    | chrX  | 64196281/C//A  | synonymous    | 1 | 0 |
| NLGN3    | chrX  | 70367627/C//T  | synonymous    | 1 | 0 |
| NLGN3    | chrX  | 70367698/G//A  | synonymous    | 1 | 0 |
| CXCR3    | chrX  | 70837068/A//T  | nonsynonymous | 1 | 0 |
| UPRT     | chrX  | 74513326/T//C  | nonsynonymous | 1 | 0 |
| CYLC1    | chrX  | 83128936/C//A  | nonsynonymous | 1 | 0 |
| HDX      | chrX  | 83723641/C//A  | nonsynonymous | 1 | 0 |
| DACH2    | chrX  | 85403684/G//GT | nonsynonymous | 1 | 0 |
| COL4A6   | chrX  | 107402841/C//A | nonsynonymous | 1 | 0 |
| RGAG1    | chrX  | 109695624/G//C | nonsynonymous | 1 | 0 |
| DCX      | chrX  | 110574250/T//A | synonymous    | 1 | 0 |
| DCX      | chrX  | 110644517/C//G | nonsynonymous | 1 | 0 |
| KIAA1210 | chrX  | 118222153/C//A | nonsynonymous | 1 | 0 |
| UPF3B    | chrX  | 118977255/T//C | nonsynonymous | 1 | 0 |
| TEX13C   | chrX  | 124456905/G//T | nonsynonymous | 1 | 0 |
| DCAF12L1 | chrX  | 125685562/G//A | synonymous    | 1 | 0 |
| SMARCA1  | chrX  | 128605237/C//A | nonsynonymous | 1 | 0 |
| XPNPEP2  | chrX  | 128880298/T//G | nonsynonymous | 1 | 0 |
| ENOX2    | chrX  | 129759374/T//A | nonsynonymous | 1 | 0 |
| GPC4     | chrX  | 132458216/T//C | nonsynonymous | 1 | 0 |
| ADGRG4   | chrX  | 135429016/G//A | nonsynonymous | 1 | 0 |
| ADGRG4   | chrX  | 135455135/G//A | nonsynonymous | 1 | 0 |
| ADGRG4   | chrX  | 135485397/C//A | synonymous    | 1 | 0 |
| CD40LG   | chrX  | 135730523/C//A | nonsynonymous | 1 | 0 |
|          | chrX  | 138727739/G//T | synonymous    | 1 | 0 |
| MAGEC3   | chrX  | 140969250/C//A | nonsynonymous | 1 | 0 |
| SLITRK2  | chrX  | 144904417/C//A | nonsynonymous | 1 | 0 |
| PRRG3    | chrX  | 150868534/A//T | nonsynonymous | 1 | 0 |
| PNMA5    | chrX  | 152158994/C//A | nonsynonymous | 1 | 0 |

|          |      |                          |               |   |   |
|----------|------|--------------------------|---------------|---|---|
| ATP2B3   | chrX | 152807190/G//T           | nonsynonymous | 1 | 0 |
| ATP2B3   | chrX | 152826171/G//T           | synonymous    | 1 | 0 |
| L1CAM    | chrX | 153132281/C//A           | nonsynonymous | 1 | 0 |
| FLNA     | chrX | 153594450/G//A           | synonymous    | 1 | 0 |
| DVL1     | chr1 | 1273393/A//C             | nonsynonymous | 1 | 0 |
| MIIP     | chr1 | 12091409/C//T            | synonymous    | 1 | 0 |
| FHAD1    | chr1 | 15623224/G//T            | nonsynonymous | 1 | 0 |
| CSMD2    | chr1 | 34209214/G//A            | synonymous    | 1 | 0 |
| PRKAA2   | chr1 | 57161792/C//A            | nonsynonymous | 1 | 0 |
| C1orf168 | chr1 | 57206384/C//G            | synonymous    | 1 | 0 |
| SLC44A5  | chr1 | 75681456/T//C            | nonsynonymous | 1 | 0 |
| LRRRC8D  | chr1 | 90399473/G//C            | nonsynonymous | 1 | 0 |
| PTPN22   | chr1 | 114391172/G//C           | nonsynonymous | 1 | 0 |
| FCRL3    | chr1 | 157665392/C//T           | nonsynonymous | 1 | 0 |
| KIFAP3   | chr1 | 169941688/C//T           | nonsynonymous | 1 | 0 |
| KIAA1614 | chr1 | 180897634/G//A           | nonsynonymous | 1 | 0 |
| CACNA1E  | chr1 | 181752817/G//T           | nonsynonymous | 1 | 0 |
| KCNH1    | chr1 | 211192226/C//T           | nonsynonymous | 1 | 0 |
| ARID4B   | chr1 | 235377296/T//C           | synonymous    | 1 | 0 |
| OR2L2    | chr1 | 248202347/C//T           | nonsynonymous | 1 | 0 |
| KCNF1    | chr2 | 11052922/G//C            | nonsynonymous | 1 | 0 |
| RHOB     | chr2 | 20647357/CCGACATTGAGGTGG | nonsynonymous | 1 | 0 |
| SLC3A1   | chr2 | 44502819/A//T            | nonsynonymous | 1 | 0 |
| SOCS5    | chr2 | 46987160/G//A            | synonymous    | 1 | 0 |
| ZNF2     | chr2 | 95847499/C//G            | nonsynonymous | 1 | 0 |
| IL1RL2   | chr2 | 102835512/A//G           | nonsynonymous | 1 | 0 |
| CCDC74A  | chr2 | 132290992/G//T           | synonymous    | 1 | 0 |
| SCN9A    | chr2 | 167085373/C//G           | nonsynonymous | 1 | 0 |
| XIRP2    | chr2 | 168105485/C//G           | nonsynonymous | 1 | 0 |
| TTN      | chr2 | 179480098/C//G           | nonsynonymous | 1 | 0 |
| TTN      | chr2 | 179569253/A//G           | synonymous    | 1 | 0 |
| TTN      | chr2 | 179597376/C//G           | nonsynonymous | 1 | 0 |
| TTN      | chr2 | 179639041/C//T           | nonsynonymous | 1 | 0 |
| ITGA4    | chr2 | 182360510/G//T           | nonsynonymous | 1 | 0 |
| TMEFF2   | chr2 | 193056608/T//G           | nonsynonymous | 1 | 0 |
| ZFAND2B  | chr2 | 220074021/T//A           | nonsynonymous | 1 | 0 |
| STK11IP  | chr2 | 220479822/C//T           | nonsynonymous | 1 | 0 |
|          | chr2 | 230127406/G//C           | synonymous    | 1 | 0 |
| GRM7     | chr3 | 7494476/C//T             | nonsynonymous | 1 | 0 |
| TRANK1   | chr3 | 36898248/G//C            | nonsynonymous | 1 | 0 |
| KRBOX1   | chr3 | 42984095/A//AC           | nonsynonymous | 1 | 0 |
| PTH1R    | chr3 | 46943307/C//T            | nonsynonymous | 1 | 0 |
| FHIT     | chr3 | 59737930/C//T            | synonymous    | 1 | 0 |
| TRMT10C  | chr3 | 101284182/A//C           | nonsynonymous | 1 | 0 |
| TRMT10C  | chr3 | 101284645/A//G           | synonymous    | 1 | 0 |
| COL6A5   | chr3 | 130107927/A//C           | nonsynonymous | 1 | 0 |
| IL20RB   | chr3 | 136708337/T//C           | nonsynonymous | 1 | 0 |
| SOX14    | chr3 | 137483863/T//G           | synonymous    | 1 | 0 |
| GPR87    | chr3 | 151012787/T//C           | nonsynonymous | 1 | 0 |
| EHHADH   | chr3 | 184911074/T//A           | nonsynonymous | 1 | 0 |
| NFXL1    | chr4 | 47857086/C//G            | nonsynonymous | 1 | 0 |
| UGT2B10  | chr4 | 69885514/C//G            | nonsynonymous | 1 | 0 |
| PPEF2    | chr4 | 76805822/A//G            | nonsynonymous | 1 | 0 |
| SEPT11   | chr4 | 77932958/C//T            | nonsynonymous | 1 | 0 |
| ADH4     | chr4 | 100063874/C//T           | nonsynonymous | 1 | 0 |
| ENPEP    | chr4 | 111397959/G//A           | nonsynonymous | 1 | 0 |
| MAB21L2  | chr4 | 151505231/C//A           | synonymous    | 1 | 0 |
| FBXW7    | chr4 | 153258983/G//A           | nonsynonymous | 1 | 0 |
| FBXW7    | chr4 | 153259090/T//C           | nonsynonymous | 1 | 0 |
| GUCY1B3  | chr4 | 156725843/C//G           | nonsynonymous | 1 | 0 |
| IRX1     | chr5 | 3599817/C//T             | nonsynonymous | 1 | 0 |
| FGF10    | chr5 | 44310629/A//G            | nonsynonymous | 1 | 0 |
| N4BP3    | chr5 | 177547629/G//A           | nonsynonymous | 1 | 0 |
| RNF130   | chr5 | 179393859/G//A           | nonsynonymous | 1 | 0 |
| ELOVL2   | chr6 | 11010983/C//T            | synonymous    | 1 | 0 |
| JARID2   | chr6 | 15501478/C//T            | synonymous    | 1 | 0 |
| ATXN1    | chr6 | 16326864/C//T            | nonsynonymous | 1 | 0 |
| IP6K3    | chr6 | 33695934/C//T            | nonsynonymous | 1 | 0 |
| TTBK1    | chr6 | 43225634/G//A            | nonsynonymous | 1 | 0 |
| TDRD6    | chr6 | 46656026/C//T            | nonsynonymous | 1 | 0 |

|          |       |                   |               |   |   |
|----------|-------|-------------------|---------------|---|---|
| PDSS2    | chr6  | 107475951/C//A    | nonsynonymous | 1 | 0 |
| GPR6     | chr6  | 110300986/G//A    | nonsynonymous | 1 | 0 |
| GOPC     | chr6  | 117888198/C//G    | nonsynonymous | 1 | 0 |
| BCLAF1   | chr6  | 136596705/A//G    | nonsynonymous | 1 | 0 |
| NMBR     | chr6  | 142409753/C//T    | nonsynonymous | 1 | 0 |
| ZDHHC14  | chr6  | 157963716/C//T    | synonymous    | 1 | 0 |
| DNAH11   | chr7  | 21932181/G//C     | nonsynonymous | 1 | 0 |
| HECW1    | chr7  | 43477654/A//G     | nonsynonymous | 1 | 0 |
| NPC1L1   | chr7  | 44575567/G//A     | nonsynonymous | 1 | 0 |
| ZNF107   | chr7  | 64168217/C//T     | nonsynonymous | 1 | 0 |
| TYW1     | chr7  | 66703525/G//A     | synonymous    | 1 | 0 |
| PCLO     | chr7  | 82584638/T//TA    | nonsynonymous | 1 | 0 |
| TFPI2    | chr7  | 93519522/G//A     | synonymous    | 1 | 0 |
| BUD31    | chr7  | 99017026/G//A     | nonsynonymous | 1 | 0 |
| LAMB4    | chr7  | 107703363/G//A    | synonymous    | 1 | 0 |
| MET      | chr7  | 116340231/T//C    | nonsynonymous | 1 | 0 |
| PPP3CC   | chr8  | 22398303/A//G     | synonymous    | 1 | 0 |
| RP1      | chr8  | 55537356/A//C     | nonsynonymous | 1 | 0 |
| SDCBP    | chr8  | 59490749/C//G     | nonsynonymous | 1 | 0 |
| CA8      | chr8  | 61139429/T//C     | synonymous    | 1 | 0 |
| ADHFE1   | chr8  | 67364310/C//T     | nonsynonymous | 1 | 0 |
| DEPTOR   | chr8  | 120977486/A//T    | nonsynonymous | 1 | 0 |
| SCRIB    | chr8  | 144886823/G//A    | nonsynonymous | 1 | 0 |
| FGD3     | chr9  | 95738925/C//T     | synonymous    | 1 | 0 |
| ANKS6    | chr9  | 101540530/C//T    | synonymous    | 1 | 0 |
| RGS3     | chr9  | 116258120/A//C    | synonymous    | 1 | 0 |
| OLFML2A  | chr9  | 127572200/G//A    | nonsynonymous | 1 | 0 |
| NOXA1    | chr9  | 140328756/C//T    | nonsynonymous | 1 | 0 |
| TUBB8    | chr10 | 93817/G//A        | nonsynonymous | 1 | 0 |
| PTCHD3   | chr10 | 27702947/G//A     | nonsynonymous | 1 | 0 |
| SLC18A3  | chr10 | 50819673/G//T     | nonsynonymous | 1 | 0 |
|          | chr10 | 55570431/T//A     | synonymous    | 1 | 0 |
| ANK3     | chr10 | 61815562/G//T     | nonsynonymous | 1 | 0 |
| SLIT1    | chr10 | 98806442/T//G     | nonsynonymous | 1 | 0 |
| FOXI2    | chr10 | 129535766/G//A    | nonsynonymous | 1 | 0 |
| KNDC1    | chr10 | 134981792/C//T    | synonymous    | 1 | 0 |
| TMEM80   | chr11 | 703154/C//T       | synonymous    | 1 | 0 |
| CTSD     | chr11 | 1774747/C//A      | nonsynonymous | 1 | 0 |
| SLC22A18 | chr11 | 2930890/C//T      | synonymous    | 1 | 0 |
| RBMXL2   | chr11 | 7110884/G//A      | nonsynonymous | 1 | 0 |
| OR4C15   | chr11 | 55322186/T//C     | nonsynonymous | 1 | 0 |
| ZDHHC5   | chr11 | 57457857/T//TCACG | nonsynonymous | 1 | 0 |
| CHRDL2   | chr11 | 74441961/C//T     | synonymous    | 1 | 0 |
| CREBZF   | chr11 | 85375769/G//C     | nonsynonymous | 1 | 0 |
| GUCY1A2  | chr11 | 106558439/G//A    | nonsynonymous | 1 | 0 |
| CWF19L2  | chr11 | 107260824/C//T    | synonymous    | 1 | 0 |
|          | chr11 | 118127937/T//G    | synonymous    | 1 | 0 |
| CCND2    | chr12 | 4383276/G//T      | nonsynonymous | 1 | 0 |
| CLEC6A   | chr12 | 8618211/A//T      | nonsynonymous | 1 | 0 |
| SOX5     | chr12 | 24048943/T//A     | synonymous    | 1 | 0 |
| LETMD1   | chr12 | 51450004/G//A     | nonsynonymous | 1 | 0 |
| KRT84    | chr12 | 52774993/C//T     | synonymous    | 1 | 0 |
| KRT79    | chr12 | 53228026/G//A     | nonsynonymous | 1 | 0 |
| HNRNPA1  | chr12 | 54675574/C//G     | synonymous    | 1 | 0 |
| PAN2     | chr12 | 56717656/G//A     | nonsynonymous | 1 | 0 |
| LRRC10   | chr12 | 70004402/G//T     | nonsynonymous | 1 | 0 |
| NEDD1    | chr12 | 97334208/C//G     | nonsynonymous | 1 | 0 |
| ANKRD13A | chr12 | 110474093/G//C    | nonsynonymous | 1 | 0 |
| NCOR2    | chr12 | 124857079/C//A    | nonsynonymous | 1 | 0 |
| KPNA3    | chr13 | 50321089/C//T     | nonsynonymous | 1 | 0 |
| LMO7     | chr13 | 76395543/C//T     | nonsynonymous | 1 | 0 |
| CCDC168  | chr13 | 103394425/C//T    | synonymous    | 1 | 0 |
| SSTR1    | chr14 | 38679494/C//T     | synonymous    | 1 | 0 |
| SIX6     | chr14 | 60976301/T//G     | nonsynonymous | 1 | 0 |
| SLC8A3   | chr14 | 70512676/G//T     | synonymous    | 1 | 0 |
| EML5     | chr14 | 89130911/A//C     | nonsynonymous | 1 | 0 |
| UNC79    | chr14 | 94173265/G//A     | synonymous    | 1 | 0 |
| SNAP23   | chr15 | 42821882/T//C     | synonymous    | 1 | 0 |
| DYX1C1   | chr15 | 55759243/T//A     | nonsynonymous | 1 | 0 |
| HERC1    | chr15 | 63904583/C//T     | nonsynonymous | 1 | 0 |

|              |       |                      |               |   |   |
|--------------|-------|----------------------|---------------|---|---|
| ABCA3        | chr16 | 2329008/C//T         | nonsynonymous | 1 | 0 |
| FBXL19       | chr16 | 30941840/C//T        | synonymous    | 1 | 0 |
| LCAT         | chr16 | 67976617/G//A        | synonymous    | 1 | 0 |
| MLKL         | chr16 | 74708872/C//T        | nonsynonymous | 1 | 0 |
| ADAMTS18     | chr16 | 77398085/C//T        | nonsynonymous | 1 | 0 |
| PKD1L2       | chr16 | 81222545/G//A        | nonsynonymous | 1 | 0 |
| NXN          | chr17 | 726880/C//T          | nonsynonymous | 1 | 0 |
| GSG2         | chr17 | 3627597/CGCAGAAGT//C | nonsynonymous | 1 | 0 |
| C17orf107    | chr17 | 4804527/C//T         | synonymous    | 1 | 0 |
| NSRP1        | chr17 | 28505172/A//G        | synonymous    | 1 | 0 |
| WNK4         | chr17 | 40948553/G//A        | nonsynonymous | 1 | 0 |
| SDK2         | chr17 | 71397881/G//A        | synonymous    | 1 | 0 |
| CD300LB      | chr17 | 72527512/G//A        | synonymous    | 1 | 0 |
| SEH1L        | chr18 | 12978753/A//C        | nonsynonymous | 1 | 0 |
| SMAD2        | chr18 | 45375020/A//C        | nonsynonymous | 1 | 0 |
| DCC          | chr18 | 50985827/A//G        | synonymous    | 1 | 0 |
| FZR1         | chr19 | 3527007/C//G         | synonymous    | 1 | 0 |
| TBXA2R       | chr19 | 3600361/G//A         | nonsynonymous | 1 | 0 |
| SPC24        | chr19 | 11257825/C//T        | synonymous    | 1 | 0 |
| ZNF700       | chr19 | 12060374/T//A        | nonsynonymous | 1 | 0 |
| NOTCH3       | chr19 | 15285087/G//A        | nonsynonymous | 1 | 0 |
| KLF2         | chr19 | 16436633/G//A        | nonsynonymous | 1 | 0 |
| CHERP        | chr19 | 16639022/C//T        | nonsynonymous | 1 | 0 |
| CRLF1        | chr19 | 18707451/G//A        | synonymous    | 1 | 0 |
| CRTC1        | chr19 | 18882313/C//T        | nonsynonymous | 1 | 0 |
| ZNF708       | chr19 | 21476980/C//T        | nonsynonymous | 1 | 0 |
| TSHZ3        | chr19 | 31768995/C//A        | synonymous    | 1 | 0 |
| PSG4         | chr19 | 43698559/A//C        | nonsynonymous | 1 | 0 |
| RSPH6A       | chr19 | 46307573/G//A        | synonymous    | 1 | 0 |
| LILRA1       | chr19 | 55106668/C//G        | nonsynonymous | 1 | 0 |
| KIF16B       | chr20 | 16410518/TATAAG//T   | nonsynonymous | 1 | 0 |
| SYNDIG1      | chr20 | 24523935/G//C        | nonsynonymous | 1 | 0 |
| PPP1R16B     | chr20 | 37524319/G//C        | nonsynonymous | 1 | 0 |
| ZNF831       | chr20 | 57829109/C//T        | nonsynonymous | 1 | 0 |
| LTN1         | chr21 | 30338728/A//T        | nonsynonymous | 1 | 0 |
| HUNK         | chr21 | 33371231/A//G        | nonsynonymous | 1 | 0 |
| GART         | chr21 | 34901156/C//G        | nonsynonymous | 1 | 0 |
| DYRK1A       | chr21 | 38884489/C//G        | synonymous    | 1 | 0 |
| DSCAM        | chr21 | 41550901/C//A        | nonsynonymous | 1 | 0 |
| MCM3AP       | chr21 | 47660800/C//T        | nonsynonymous | 1 | 0 |
| CABIN1       | chr22 | 24445671/G//A        | nonsynonymous | 1 | 0 |
| RHBDD3       | chr22 | 29656780/G//A        | synonymous    | 1 | 0 |
| CELSR1       | chr22 | 46787523/C//T        | synonymous    | 1 | 0 |
| PIM3         | chr22 | 50356713/C//T        | nonsynonymous | 1 | 0 |
| FAM47B       | chrX  | 34962424/C//T        | synonymous    | 1 | 0 |
| USP11        | chrX  | 47098475/T//C        | synonymous    | 1 | 0 |
| STARD8       | chrX  | 67937376/G//A        | nonsynonymous | 1 | 0 |
| MID2         | chrX  | 107084562/C//T       | nonsynonymous | 1 | 0 |
| ADGRF5       | chr6  | 46874420/T//C        | nonsynonymous | 0 | 1 |
| CALCOCO1     | chr12 | 54110076/T//C        | nonsynonymous | 0 | 1 |
| GOLGA3       | chr12 | 133360757/T//C       | nonsynonymous | 0 | 1 |
| ZNF26        | chr12 | 133587370/T//C       | nonsynonymous | 0 | 1 |
| PSEN1        | chr14 | 73678592/A//G        | synonymous    | 0 | 1 |
| ZNF236       | chr18 | 74590101/T//C        | nonsynonymous | 0 | 1 |
| GAMT         | chr19 | 1399793/T//C         | nonsynonymous | 0 | 1 |
| LAMA5        | chr20 | 60904921/A//G        | nonsynonymous | 0 | 1 |
| MED12        | chrX  | 70349922/A//G        | nonsynonymous | 0 | 1 |
| BTK          | chrX  | 100611125/T//C       | nonsynonymous | 0 | 1 |
| ESPN         | chr1  | 6511915/T//C         | nonsynonymous | 0 | 1 |
| PRAMEF1      | chr1  | 12854544/T//C        | synonymous    | 0 | 1 |
| HFM1         | chr1  | 91779578/C//A        | nonsynonymous | 0 | 1 |
| CD1B         | chr1  | 158299176/G//T       | nonsynonymous | 0 | 1 |
| CACNA1E      | chr1  | 181754450/C//G       | synonymous    | 0 | 1 |
| PPP4R3B      | chr2  | 55792037/C//G        | nonsynonymous | 0 | 1 |
| ABCB11       | chr2  | 169851904/C//A       | nonsynonymous | 0 | 1 |
| ZGRF1        | chr4  | 113538953/C//A       | nonsynonymous | 0 | 1 |
| CDH9         | chr5  | 26885886/G//A        | synonymous    | 0 | 1 |
| NUDT12       | chr5  | 102894631/A//T       | nonsynonymous | 0 | 1 |
| SLC12A2      | chr5  | 127477569/G//A       | nonsynonymous | 0 | 1 |
| LOC100505635 | chr6  | 39856612/G//A        | synonymous    | 0 | 1 |

|              |       |                           |               |   |   |
|--------------|-------|---------------------------|---------------|---|---|
| PRIM2        | chr6  | 57512614/A//T             | nonsynonymous | 0 | 1 |
| NCOA2        | chr8  | 71036916/C//T             | synonymous    | 0 | 1 |
| C9orf57      | chr9  | 74674163/CGAATAAGATAACACC | nonsynonymous | 0 | 1 |
| ATRNL1       | chr10 | 117607480/T//C            | synonymous    | 0 | 1 |
| LOC100128386 | chr11 | 100558592/C//A            | synonymous    | 0 | 1 |
| TAS2R9       | chr12 | 10962246/A//G             | synonymous    | 0 | 1 |
| BCAT1        | chr12 | 24985748/G//A             | nonsynonymous | 0 | 1 |
| RTN1         | chr14 | 60212955/A//G             | synonymous    | 0 | 1 |
| ADAMTS18     | chr16 | 77398216/G//A             | nonsynonymous | 0 | 1 |
| TMEM132E     | chr17 | 32959799/G//A             | nonsynonymous | 0 | 1 |
| ERN1         | chr17 | 62152614/A//C             | synonymous    | 0 | 1 |
| RAB8A        | chr19 | 16240421/G//A             | synonymous    | 0 | 1 |
| POLD1        | chr19 | 50916731/G//T             | nonsynonymous | 0 | 1 |
| APOL5        | chr22 | 36123119/A//G             | nonsynonymous | 0 | 1 |
| CCDC120      | chrX  | 48921951/C//T             | synonymous    | 0 | 1 |
| UPRT         | chrX  | 74517333/G//T             | nonsynonymous | 0 | 1 |
| TRMT2B       | chrX  | 100276951/G//A            | synonymous    | 0 | 1 |
| PLXNB3       | chrX  | 153037046/G//A            | nonsynonymous | 0 | 1 |
| CDK11B       | chr1  | 1573181/C//A              | synonymous    | 0 | 1 |
| SEMA4F       | chr2  | 74902748/T//C             | nonsynonymous | 0 | 1 |
| SLC34A2      | chr4  | 25674815/G//GA            | nonsynonymous | 0 | 1 |
| TSSK1B       | chr5  | 112769824/G//A            | nonsynonymous | 0 | 1 |
| HIST1H2AM    | chr6  | 27860566/G//T             | nonsynonymous | 0 | 1 |
| EYS          | chr6  | 66006012/T//A             | nonsynonymous | 0 | 1 |
| ZMIZ2        | chr7  | 44802518/C//T             | synonymous    | 0 | 1 |
| GALNTL5      | chr7  | 151699921/G//A            | nonsynonymous | 0 | 1 |
| OR1K1        | chr9  | 125562887/G//C            | synonymous    | 0 | 1 |
| CFAP46       | chr10 | 134671213/C//T            | nonsynonymous | 0 | 1 |
| KNDC1        | chr10 | 134997427/G//A            | nonsynonymous | 0 | 1 |
| PUS7L        | chr12 | 44148918/T//C             | nonsynonymous | 0 | 1 |
| ALPK3        | chr15 | 85400817/C//T             | nonsynonymous | 0 | 1 |
| XYLT1        | chr16 | 17228330/C//T             | nonsynonymous | 0 | 1 |
| LRRC3C       | chr17 | 38100737/C//T             | nonsynonymous | 0 | 1 |
| EPN3         | chr17 | 48618218/G//T             | synonymous    | 0 | 1 |
| JPH2         | chr20 | 42789014/C//T             | nonsynonymous | 0 | 1 |
| NONO         | chrX  | 70514339/C//G             | nonsynonymous | 0 | 1 |
| GABRE        | chrX  | 151123552/C//T            | nonsynonymous | 0 | 1 |
| ITPR1        | chr3  | 4856159/G//A              | synonymous    | 0 | 1 |
| BTN2A2       | chr6  | 26390402/GGA//G           | nonsynonymous | 0 | 1 |
| ATOH7        | chr10 | 69991146/C//T             | nonsynonymous | 0 | 1 |
| PEX16        | chr11 | 45935930/T//C             | nonsynonymous | 0 | 1 |
| ARHGAP23     | chr17 | 36633932/C//T             | nonsynonymous | 0 | 1 |
| ZNF253       | chr19 | 20002701/T//C             | synonymous    | 0 | 1 |
| HTR3D        | chr3  | 183756699/T//C            | nonsynonymous | 0 | 1 |
| UGT2B28      | chr4  | 70156392/A//G             | synonymous    | 0 | 1 |
| CCNK         | chr14 | 99967172/T//C             | nonsynonymous | 0 | 1 |
| HEXA         | chr15 | 72641577/A//G             | nonsynonymous | 0 | 1 |
| SS18         | chr18 | 23637667/T//C             | nonsynonymous | 0 | 1 |
| UBIAD1       | chr1  | 11346108/G//A             | nonsynonymous | 0 | 1 |
| NID1         | chr1  | 236157057/G//A            | synonymous    | 0 | 1 |
| SNTG2        | chr2  | 1079274/C//T              | nonsynonymous | 0 | 1 |
| CNTNAP5      | chr2  | 124999841/C//T            | synonymous    | 0 | 1 |
| ECE2         | chr3  | 184008356/C//A            | nonsynonymous | 0 | 1 |
| MUC4         | chr3  | 195512990/C//G            | nonsynonymous | 0 | 1 |
| SHROOM3      | chr4  | 77631405/G//A             | synonymous    | 0 | 1 |
| PIK3R1       | chr5  | 67589585/C//CATGAAT       | nonsynonymous | 0 | 1 |
| APC          | chr5  | 112175579/AC//A           | nonsynonymous | 0 | 1 |
| TRPA1        | chr8  | 72951161/G//T             | nonsynonymous | 0 | 1 |
| ANKRD18A     | chr9  | 38575653/C//T             | synonymous    | 0 | 1 |
|              | chr9  | 73398840/T//C             | synonymous    | 0 | 1 |
| CARD9        | chr9  | 139258965/C//T            | nonsynonymous | 0 | 1 |
| PFKFB3       | chr10 | 6262673/C//T              | nonsynonymous | 0 | 1 |
| POLR2G       | chr11 | 62529139/A//G             | synonymous    | 0 | 1 |
| UGGT2        | chr13 | 96515941/C//A             | nonsynonymous | 0 | 1 |
| ZNF423       | chr16 | 49672282/C//A             | nonsynonymous | 0 | 1 |
| DHRS7B       | chr17 | 21094356/GCTGACTTA//G     | nonsynonymous | 0 | 1 |
| COL1A1       | chr17 | 48262937/C//G             | nonsynonymous | 0 | 1 |
| APOH         | chr17 | 64210685/T//C             | nonsynonymous | 0 | 1 |
| TMC8         | chr17 | 76128488/T//C             | nonsynonymous | 0 | 1 |
| MISP         | chr19 | 757199/G//A               | nonsynonymous | 0 | 1 |



|           |       |                    |               |   |   |
|-----------|-------|--------------------|---------------|---|---|
| INSR      | chr19 | 7172330/A//G       | synonymous    | 0 | 1 |
| RFX1      | chr19 | 14074381/TGGC//T   | nonsynonymous | 0 | 1 |
| CPAMD8    | chr19 | 17032727/G//A      | nonsynonymous | 0 | 1 |
| ZNF831    | chr20 | 57767250/G//A      | synonymous    | 0 | 1 |
| SON       | chr21 | 34923991/C//T      | synonymous    | 0 | 1 |
| CSF2RA    | chrX  | 1428601/G//A       | synonymous    | 0 | 1 |
| APEX2     | chrX  | 55033203/G//A      | nonsynonymous | 0 | 1 |
| TMSB15A   | chrX  | 101769048/G//T     | synonymous    | 0 | 1 |
| KCNE5     | chrX  | 108868103/G//A     | synonymous    | 0 | 1 |
| CNGA2     | chrX  | 150908126/G//A     | nonsynonymous | 0 | 1 |
| PTPRU     | chr1  | 29641949/A//G      | nonsynonymous | 1 | 0 |
| HRNR      | chr1  | 152185792/G//A     | synonymous    | 1 | 0 |
| HRNR      | chr1  | 152185796/A//G     | nonsynonymous | 1 | 0 |
| IARS2     | chr1  | 220300149/T//C     | nonsynonymous | 1 | 0 |
| TP53BP2   | chr1  | 223984275/T//C     | nonsynonymous | 1 | 0 |
| GIGYF2    | chr2  | 233712069/G//A     | nonsynonymous | 1 | 0 |
| ZNF717    | chr3  | 75786866/G//T      | synonymous    | 1 | 0 |
| ZNF717    | chr3  | 75786892/A//C      | nonsynonymous | 1 | 0 |
| ZNF717    | chr3  | 75786899/T//C      | synonymous    | 1 | 0 |
| ZNF717    | chr3  | 75786910/T//C      | nonsynonymous | 1 | 0 |
| ZNF717    | chr3  | 75786916/C//A      | nonsynonymous | 1 | 0 |
| ZNF717    | chr3  | 75786919/A//T      | nonsynonymous | 1 | 0 |
| SYNE1     | chr6  | 152527482/A//G     | nonsynonymous | 1 | 0 |
| ABHD17B   | chr9  | 74489533/G//A      | nonsynonymous | 1 | 0 |
| NTRK2     | chr9  | 87635188/C//T      | nonsynonymous | 1 | 0 |
| PRRX2     | chr9  | 132483040/T//C     | nonsynonymous | 1 | 0 |
| KCNT1     | chr9  | 138641988/G//A     | nonsynonymous | 1 | 0 |
| ELMOD1    | chr11 | 107488835/CACTT//C | synonymous    | 1 | 0 |
| RALGAPA1  | chr14 | 36217801/ATC//A    | nonsynonymous | 1 | 0 |
| DYNC1H1   | chr14 | 102431038/C//T     | nonsynonymous | 1 | 0 |
| ATP2A1    | chr16 | 28899001/T//C      | nonsynonymous | 1 | 0 |
| STAT5B    | chr17 | 40353745/A//G      | synonymous    | 1 | 0 |
| RBBP7     | chrX  | 16876906/T//C      | nonsynonymous | 1 | 0 |
| AP4B1     | chr1  | 114438987/G//GTTT  | nonsynonymous | 0 | 1 |
| PROS1     | chr3  | 93617382/A//G      | synonymous    | 0 | 1 |
| ITGB8     | chr7  | 20371466/T//C      | nonsynonymous | 0 | 1 |
| TOP1MT    | chr8  | 144403494/A//G     | synonymous    | 0 | 1 |
| MOB2      | chr11 | 1491473/G//C       | nonsynonymous | 0 | 1 |
| TGM7      | chr15 | 43571911/G//A      | synonymous    | 0 | 1 |
| ABR       | chr17 | 910560/G//A        | synonymous    | 0 | 1 |
| GPCPD1    | chr20 | 5560674/T//A       | nonsynonymous | 0 | 1 |
| LRRC39    | chr1  | 100626082/T//C     | synonymous    | 0 | 1 |
| AKNAD1    | chr1  | 109395309/C//T     | synonymous    | 0 | 1 |
| SLC8A1    | chr2  | 40656878/G//T      | synonymous    | 0 | 1 |
| RGPD3     | chr2  | 107073562/G//T     | nonsynonymous | 0 | 1 |
| XIRP1     | chr3  | 39230071/C//T      | nonsynonymous | 0 | 1 |
| USF3      | chr3  | 113378383/G//C     | nonsynonymous | 0 | 1 |
| HIST1H3B  | chr6  | 26031900/C//A      | nonsynonymous | 0 | 1 |
| HMGNA4    | chr6  | 26545440/C//G      | synonymous    | 0 | 1 |
| HLA-G     | chr6  | 29797674/C//T      | nonsynonymous | 0 | 1 |
| RCAN2     | chr6  | 46214568/G//C      | nonsynonymous | 0 | 1 |
| HoxA9     | chr7  | 27204728/C//T      | nonsynonymous | 0 | 1 |
| KIAA1147  | chr7  | 141362399/T//C     | synonymous    | 0 | 1 |
| TOX       | chr8  | 59750758/G//A      | nonsynonymous | 0 | 1 |
| ATRNL1    | chr10 | 117185754/C//T     | synonymous    | 0 | 1 |
| NUTM1     | chr15 | 34646640/C//A      | synonymous    | 0 | 1 |
| TP53      | chr17 | 7579371/T//TG      | nonsynonymous | 0 | 1 |
| KRTAP4-11 | chr17 | 39274415/C//T      | synonymous    | 0 | 1 |
| PEG3      | chr19 | 57326387/T//A      | synonymous    | 0 | 1 |
| MACROD2   | chr20 | 15948246/A//G      | nonsynonymous | 0 | 1 |
| NCOA3     | chr20 | 46252789/A//T      | nonsynonymous | 0 | 1 |
| ARSF      | chrX  | 2994688/G//C       | synonymous    | 0 | 1 |
| DISP3     | chr1  | 11595182/G//T      | nonsynonymous | 1 | 0 |
| SPEN      | chr1  | 16265283/C//A      | nonsynonymous | 1 | 0 |
| COL11A1   | chr1  | 103480122/C//A     | nonsynonymous | 1 | 0 |
| LCE2B     | chr1  | 152659572/C//A     | synonymous    | 1 | 0 |
| FCRL4     | chr1  | 157557286/G//A     | synonymous    | 1 | 0 |
| MNDA      | chr1  | 158812124/T//G     | nonsynonymous | 1 | 0 |
| TNN       | chr1  | 175092610/C//T     | nonsynonymous | 1 | 0 |
| CACNA1S   | chr1  | 201019515/A//T     | nonsynonymous | 1 | 0 |

|           |       |                 |               |   |   |
|-----------|-------|-----------------|---------------|---|---|
| USH2A     | chr1  | 216062206/G//T  | synonymous    | 1 | 0 |
| NID1      | chr1  | 236205258/G//C  | nonsynonymous | 1 | 0 |
| RYR2      | chr1  | 237814807/T//C  | synonymous    | 1 | 0 |
| OR2G2     | chr1  | 247752006/C//T  | synonymous    | 1 | 0 |
| TRIM58    | chr1  | 248020840/C//A  | synonymous    | 1 | 0 |
| KCNK12    | chr2  | 47797150/G//T   | synonymous    | 1 | 0 |
| INHBB     | chr2  | 121104205/C//T  | synonymous    | 1 | 0 |
| LRP1B     | chr2  | 141607809/T//C  | nonsynonymous | 1 | 0 |
| EPC2      | chr2  | 149522657/A//G  | nonsynonymous | 1 | 0 |
| FRZB      | chr2  | 183707250/A//T  | nonsynonymous | 1 | 0 |
| SF3B1     | chr2  | 198267331/C//A  | nonsynonymous | 1 | 0 |
| SATB2     | chr2  | 200173490/G//T  | nonsynonymous | 1 | 0 |
| CARF      | chr2  | 203846859/A//C  | nonsynonymous | 1 | 0 |
| NRP2      | chr2  | 206628605/G//A  | nonsynonymous | 1 | 0 |
| INPP5D    | chr2  | 234078810/G//C  | nonsynonymous | 1 | 0 |
| ABHD14B   | chr3  | 52003974/G//C   | nonsynonymous | 1 | 0 |
| CMSS1     | chr3  | 99881241/G//A   | nonsynonymous | 1 | 0 |
|           | chr3  | 113022826/C//A  | synonymous    | 1 | 0 |
| UVSSA     | chr4  | 1347033/G//T    | nonsynonymous | 1 | 0 |
| CD38      | chr4  | 15780146/G//T   | nonsynonymous | 1 | 0 |
| LRRC66    | chr4  | 52861180/G//C   | nonsynonymous | 1 | 0 |
| TMPRSS11F | chr4  | 68934500/T//A   | nonsynonymous | 1 | 0 |
| COQ2      | chr4  | 84205984/C//G   | synonymous    | 1 | 0 |
| PDHA2     | chr4  | 96761561/G//T   | nonsynonymous | 1 | 0 |
| EGF       | chr4  | 110883113/G//T  | synonymous    | 1 | 0 |
| PCDH10    | chr4  | 134073775/C//T  | nonsynonymous | 1 | 0 |
| TENM3     | chr4  | 183601874/A//C  | synonymous    | 1 | 0 |
| MARCH11   | chr5  | 16067552/G//A   | synonymous    | 1 | 0 |
| MAP1B     | chr5  | 71495801/G//C   | nonsynonymous | 1 | 0 |
| PCDHA1    | chr5  | 140166455/CT//C | nonsynonymous | 1 | 0 |
| PCDHA5    | chr5  | 140202975/G//T  | nonsynonymous | 1 | 0 |
| PCDHB8    | chr5  | 140559094/G//A  | synonymous    | 1 | 0 |
| PCDHGA9   | chr5  | 140783302/G//C  | synonymous    | 1 | 0 |
| CLINT1    | chr5  | 157214599/T//A  | synonymous    | 1 | 0 |
| SQSTM1    | chr5  | 179264918/T//A  | synonymous    | 1 | 0 |
| OR12D3    | chr6  | 29343022/G//T   | nonsynonymous | 1 | 0 |
| NOTCH4    | chr6  | 32172160/G//T   | nonsynonymous | 1 | 0 |
| PRSS35    | chr6  | 84233975/C//T   | nonsynonymous | 1 | 0 |
| LAMA2     | chr6  | 129612776/G//T  | nonsynonymous | 1 | 0 |
| TCP10L2   | chr6  | 167592535/G//A  | nonsynonymous | 1 | 0 |
| THBS2     | chr6  | 169625405/G//T  | nonsynonymous | 1 | 0 |
| CCDC129   | chr7  | 31617976/A//T   | nonsynonymous | 1 | 0 |
| SUGCT     | chr7  | 40535948/C//G   | nonsynonymous | 1 | 0 |
|           | chr7  | 44197726/G//A   | synonymous    | 1 | 0 |
| HUS1      | chr7  | 48018368/C//T   | nonsynonymous | 1 | 0 |
| PCLO      | chr7  | 82581762/T//C   | nonsynonymous | 1 | 0 |
| PRKAR2B   | chr7  | 106797494/G//T  | nonsynonymous | 1 | 0 |
| ZNF800    | chr7  | 127013707/T//C  | nonsynonymous | 1 | 0 |
| FLNC      | chr7  | 128494041/G//T  | nonsynonymous | 1 | 0 |
| MGAM      | chr7  | 141752730/G//C  | synonymous    | 1 | 0 |
| CSMD1     | chr8  | 3047589/C//A    | nonsynonymous | 1 | 0 |
|           | chr8  | 15998529/A//T   | synonymous    | 1 | 0 |
| LZTS1     | chr8  | 20112393/C//A   | synonymous    | 1 | 0 |
| PTK2B     | chr8  | 27277560/A//G   | nonsynonymous | 1 | 0 |
| FGFR1     | chr8  | 38271189/CGG//C | nonsynonymous | 1 | 0 |
| TACC1     | chr8  | 38677955/G//A   | nonsynonymous | 1 | 0 |
| PLAT      | chr8  | 42040278/G//T   | synonymous    | 1 | 0 |
| UHRF2     | chr9  | 6481682/A//G    | synonymous    | 1 | 0 |
| TMC1      | chr9  | 75431091/C//T   | synonymous    | 1 | 0 |
| SPATA31C2 | chr9  | 90746191/G//A   | synonymous    | 1 | 0 |
| DEC1      | chr9  | 118164396/G//T  | nonsynonymous | 1 | 0 |
| CRB2      | chr9  | 126125336/G//C  | nonsynonymous | 1 | 0 |
| NR5A1     | chr9  | 127253424/C//A  | synonymous    | 1 | 0 |
| PLPP7     | chr9  | 134165413/C//A  | nonsynonymous | 1 | 0 |
| KCNT1     | chr9  | 138649162/C//T  | nonsynonymous | 1 | 0 |
| CCDC3     | chr10 | 13040417/A//C   | nonsynonymous | 1 | 0 |
| KIAA1462  | chr10 | 30315216/T//A   | nonsynonymous | 1 | 0 |
| ZNF33A    | chr10 | 38343828/G//T   | nonsynonymous | 1 | 0 |
|           | chr10 | 73377267/C//A   | synonymous    | 1 | 0 |
| HPSE2     | chr10 | 100992223/G//T  | synonymous    | 1 | 0 |

|           |       |                 |               |   |   |
|-----------|-------|-----------------|---------------|---|---|
| SEC31B    | chr10 | 102267260/T//C  | nonsynonymous | 1 | 0 |
| CFAP46    | chr10 | 134690380/A//T  | nonsynonymous | 1 | 0 |
| RRP8      | chr11 | 6622791/T//A    | nonsynonymous | 1 | 0 |
| OLFML1    | chr11 | 7509471/C//A    | nonsynonymous | 1 | 0 |
| SLC1A2    | chr11 | 35282400/C//A   | synonymous    | 1 | 0 |
| OR4S2     | chr11 | 55418764/C//G   | nonsynonymous | 1 | 0 |
| OR5F1     | chr11 | 55761788/A//G   | nonsynonymous | 1 | 0 |
| FAT3      | chr11 | 92523337/G//T   | nonsynonymous | 1 | 0 |
| MAML2     | chr11 | 95826222/C//T   | nonsynonymous | 1 | 0 |
| BIN2      | chr12 | 51693409/A//G   | synonymous    | 1 | 0 |
| DPY19L2   | chr12 | 63974442/C//T   | nonsynonymous | 1 | 0 |
| GLIPR1    | chr12 | 75874824/T//A   | nonsynonymous | 1 | 0 |
| TCTN1     | chr12 | 111066634/A//T  | nonsynonymous | 1 | 0 |
| PIWIL1    | chr12 | 130842082/C//A  | nonsynonymous | 1 | 0 |
| RNF219    | chr13 | 79191012/C//A   | nonsynonymous | 1 | 0 |
| SLITRK1   | chr13 | 84454508/C//A   | nonsynonymous | 1 | 0 |
| CCDC168   | chr13 | 103388737/C//G  | nonsynonymous | 1 | 0 |
| ADSSL1    | chr14 | 105212671/C//A  | nonsynonymous | 1 | 0 |
| MYO9A     | chr15 | 72144574/T//C   | nonsynonymous | 1 | 0 |
| CPLX3     | chr15 | 75119111/G//A   | nonsynonymous | 1 | 0 |
| SLC28A1   | chr15 | 85447387/A//G   | nonsynonymous | 1 | 0 |
| ITGAM     | chr16 | 31336614/G//A   | synonymous    | 1 | 0 |
| C16orf87  | chr16 | 46843589/CTG//C | nonsynonymous | 1 | 0 |
| ZNF423    | chr16 | 49670452/T//A   | nonsynonymous | 1 | 0 |
| CSNK2A2   | chr16 | 58200564/C//A   | nonsynonymous | 1 | 0 |
| CDH1      | chr16 | 68844241/C//T   | nonsynonymous | 1 | 0 |
| DVL2      | chr17 | 7131073/C//A    | nonsynonymous | 1 | 0 |
| PER1      | chr17 | 8045237/C//A    | synonymous    | 1 | 0 |
| C17orf51  | chr17 | 21438800/C//G   | nonsynonymous | 1 | 0 |
| RHBDL3    | chr17 | 30625227/G//T   | synonymous    | 1 | 0 |
|           | chr17 | 31618741/G//A   | synonymous    | 1 | 0 |
| KRT31     | chr17 | 39553453/G//C   | synonymous    | 1 | 0 |
| TMC6      | chr17 | 76118747/T//C   | nonsynonymous | 1 | 0 |
| CD226     | chr18 | 67614141/T//G   | nonsynonymous | 1 | 0 |
| SALL3     | chr18 | 76754265/C//G   | nonsynonymous | 1 | 0 |
| STK11     | chr19 | 1220703/G//C    | nonsynonymous | 1 | 0 |
| APC2      | chr19 | 1462120/C//T    | synonymous    | 1 | 0 |
| CELF5     | chr19 | 3290264/C//A    | nonsynonymous | 1 | 0 |
| MUC16     | chr19 | 9059662/C//A    | nonsynonymous | 1 | 0 |
| MUC16     | chr19 | 9066300/G//T    | nonsynonymous | 1 | 0 |
| CYP4F12   | chr19 | 15784523/G//C   | nonsynonymous | 1 | 0 |
| ZNF208    | chr19 | 22157602/A//G   | synonymous    | 1 | 0 |
| PLEKHG2   | chr19 | 39908648/G//T   | nonsynonymous | 1 | 0 |
| ZNF155    | chr19 | 44501157/G//T   | nonsynonymous | 1 | 0 |
| PRR12     | chr19 | 50097767/G//C   | nonsynonymous | 1 | 0 |
| CPT1C     | chr19 | 50210807/TC//T  | nonsynonymous | 1 | 0 |
|           | chr19 | 51857916/T//C   | synonymous    | 1 | 0 |
| LZTS3     | chr20 | 3146206/C//A    | nonsynonymous | 1 | 0 |
| KRTAP13-1 | chr21 | 31768549/G//T   | nonsynonymous | 1 | 0 |
| ITSN1     | chr21 | 35147292/A//G   | synonymous    | 1 | 0 |
| SPATC1L   | chr21 | 47581895/C//T   | nonsynonymous | 1 | 0 |
| ASCC2     | chr22 | 30185098/T//A   | nonsynonymous | 1 | 0 |
| ZXDB      | chrX  | 57619483/T//C   | synonymous    | 1 | 0 |
| HEPH      | chrX  | 65428059/C//A   | nonsynonymous | 1 | 0 |
| P2RY10    | chrX  | 78216918/G//T   | nonsynonymous | 1 | 0 |
| DCAF12L2  | chrX  | 125298724/G//T  | nonsynonymous | 1 | 0 |
| PER3      | chr1  | 7861166/T//C    | synonymous    | 1 | 0 |
| DISP3     | chr1  | 11562131/T//C   | nonsynonymous | 1 | 0 |
| FHAD1     | chr1  | 15578302/G//T   | nonsynonymous | 1 | 0 |
| PLA2G2F   | chr1  | 20465939/G//T   | nonsynonymous | 1 | 0 |
| GRIK3     | chr1  | 37267612/C//T   | nonsynonymous | 1 | 0 |
| PLPPR4    | chr1  | 99730211/G//C   | nonsynonymous | 1 | 0 |
| PDE4DIP   | chr1  | 144918984/C//T  | nonsynonymous | 1 | 0 |
| FLG       | chr1  | 152277216/A//T  | synonymous    | 1 | 0 |
| NUP210L   | chr1  | 154112418/A//C  | nonsynonymous | 1 | 0 |
| THBS3     | chr1  | 155168003/C//T  | nonsynonymous | 1 | 0 |
| SPTA1     | chr1  | 158623112/C//T  | nonsynonymous | 1 | 0 |
| GORAB     | chr1  | 170508677/G//C  | nonsynonymous | 1 | 0 |
| DHX9      | chr1  | 182852339/C//T  | nonsynonymous | 1 | 0 |
| F13B      | chr1  | 197024881/C//T  | nonsynonymous | 1 | 0 |

|           |      |                  |               |   |   |
|-----------|------|------------------|---------------|---|---|
| KLHL29    | chr2 | 23918513/C//T    | synonymous    | 1 | 0 |
| CAD       | chr2 | 27440417/C//T    | synonymous    | 1 | 0 |
| XDH       | chr2 | 31621545/G//A    | synonymous    | 1 | 0 |
| EML6      | chr2 | 55176059/CAGA//C | nonsynonymous | 1 | 0 |
| SMYD1     | chr2 | 88387520/G//A    | nonsynonymous | 1 | 0 |
| ANKRD36   | chr2 | 97790189/T//C    | synonymous    | 1 | 0 |
| ACTR3     | chr2 | 114699805/A//C   | nonsynonymous | 1 | 0 |
| CLASP1    | chr2 | 122227422/C//T   | nonsynonymous | 1 | 0 |
| THSD7B    | chr2 | 138417321/G//C   | synonymous    | 1 | 0 |
| HOXD4     | chr2 | 177017390/G//A   | nonsynonymous | 1 | 0 |
| TTN       | chr2 | 179571347/C//T   | nonsynonymous | 1 | 0 |
| TTN       | chr2 | 179583978/A//G   | synonymous    | 1 | 0 |
| ZNF804A   | chr2 | 185731223/A//G   | nonsynonymous | 1 | 0 |
| CCDC150   | chr2 | 197593930/T//C   | nonsynonymous | 1 | 0 |
| FN1       | chr2 | 216249706/A//C   | synonymous    | 1 | 0 |
| NMUR1     | chr2 | 232390072/G//A   | synonymous    | 1 | 0 |
| COL6A3    | chr2 | 238287349/A//G   | synonymous    | 1 | 0 |
| SNED1     | chr2 | 242007219/G//A   | synonymous    | 1 | 0 |
| ATP2B2    | chr3 | 10392216/G//A    | nonsynonymous | 1 | 0 |
| WNT7A     | chr3 | 13860466/C//T    | nonsynonymous | 1 | 0 |
| EPM2AIP1  | chr3 | 37033458/G//A    | nonsynonymous | 1 | 0 |
| DLEC1     | chr3 | 38139012/G//A    | nonsynonymous | 1 | 0 |
| CACNA2D3  | chr3 | 55038847/C//T    | synonymous    | 1 | 0 |
| COL8A1    | chr3 | 99509553/G//T    | nonsynonymous | 1 | 0 |
| NFKBIZ    | chr3 | 101576213/G//T   | synonymous    | 1 | 0 |
| B4GALT4   | chr3 | 118931488/C//G   | nonsynonymous | 1 | 0 |
| HEG1      | chr3 | 124739861/G//A   | synonymous    | 1 | 0 |
| TOPBP1    | chr3 | 133342258/T//C   | nonsynonymous | 1 | 0 |
| PRR23B    | chr3 | 138739379/G//A   | nonsynonymous | 1 | 0 |
| TTC14     | chr3 | 180328219/C//G   | nonsynonymous | 1 | 0 |
| TTC14     | chr3 | 180328251/A//G   | nonsynonymous | 1 | 0 |
| AHSG      | chr3 | 186338557/C//T   | synonymous    | 1 | 0 |
| RNF168    | chr3 | 196198626/C//T   | synonymous    | 1 | 0 |
| BOD1L1    | chr4 | 13605364/T//C    | nonsynonymous | 1 | 0 |
| DCAF4L1   | chr4 | 41984887/G//A    | nonsynonymous | 1 | 0 |
| TMPRSS11A | chr4 | 68780439/TG//T   | nonsynonymous | 1 | 0 |
| UGT2A2    | chr4 | 70504662/G//T    | nonsynonymous | 1 | 0 |
| THAP9     | chr4 | 83838887/A//T    | nonsynonymous | 1 | 0 |
| MAPK10    | chr4 | 87023126/T//C    | nonsynonymous | 1 | 0 |
| PPM1K     | chr4 | 89189971/C//T    | nonsynonymous | 1 | 0 |
| CASP6     | chr4 | 110618804/G//A   | synonymous    | 1 | 0 |
| ALPK1     | chr4 | 113303556/T//G   | nonsynonymous | 1 | 0 |
| MAML3     | chr4 | 140810650/T//C   | nonsynonymous | 1 | 0 |
| MAML3     | chr4 | 140812099/T//A   | nonsynonymous | 1 | 0 |
| MARCH1    | chr4 | 164775218/G//A   | synonymous    | 1 | 0 |
| TENM3     | chr4 | 183664409/C//T   | nonsynonymous | 1 | 0 |
| ERAP1     | chr5 | 96127767/A//C    | nonsynonymous | 1 | 0 |
| APC       | chr5 | 112173602/G//T   | nonsynonymous | 1 | 0 |
| PCDHB13   | chr5 | 140595403/G//A   | nonsynonymous | 1 | 0 |
| PCDHB13   | chr5 | 140595792/G//A   | synonymous    | 1 | 0 |
| GRIA1     | chr5 | 153144043/A//G   | nonsynonymous | 1 | 0 |
| MED7      | chr5 | 156565696/A//G   | synonymous    | 1 | 0 |
| RANBP17   | chr5 | 170346473/A//G   | nonsynonymous | 1 | 0 |
| OR2W1     | chr6 | 29012329/G//C    | synonymous    | 1 | 0 |
| PKHD1     | chr6 | 51887691/C//T    | nonsynonymous | 1 | 0 |
| MCM3      | chr6 | 52144358/A//G    | nonsynonymous | 1 | 0 |
| HCRTR2    | chr6 | 55147027/A//C    | nonsynonymous | 1 | 0 |
| COL12A1   | chr6 | 75899397/T//C    | nonsynonymous | 1 | 0 |
| MDN1      | chr6 | 90394651/C//G    | nonsynonymous | 1 | 0 |
| EPA7      | chr6 | 93967222/T//C    | synonymous    | 1 | 0 |
| AGPAT4    | chr6 | 161570289/T//C   | nonsynonymous | 1 | 0 |
| DMTF1     | chr7 | 86817422/C//G    | nonsynonymous | 1 | 0 |
| COL1A2    | chr7 | 94043217/T//C    | synonymous    | 1 | 0 |
| NPTX2     | chr7 | 98257924/C//T    | nonsynonymous | 1 | 0 |
| AASS      | chr7 | 121733177/T//G   | nonsynonymous | 1 | 0 |
| LMOD2     | chr7 | 123296147/C//T   | nonsynonymous | 1 | 0 |
| TBXAS1    | chr7 | 139529161/G//C   | synonymous    | 1 | 0 |
|           | chr7 | 143417995/C//T   | synonymous    | 1 | 0 |
| ABCB8     | chr7 | 150737687/C//T   | nonsynonymous | 1 | 0 |
| DLC1      | chr8 | 13357107/T//A    | nonsynonymous | 1 | 0 |

|               |       |                  |               |   |   |
|---------------|-------|------------------|---------------|---|---|
| PDLIM2        | chr8  | 22442865/C//T    | nonsynonymous | 1 | 0 |
| NRG1          | chr8  | 32453445/G//A    | nonsynonymous | 1 | 0 |
| ST18          | chr8  | 53044521/C//T    | nonsynonymous | 1 | 0 |
| NPBWR1        | chr8  | 53852752/C//T    | synonymous    | 1 | 0 |
| RP1           | chr8  | 55540963/A//C    | synonymous    | 1 | 0 |
| PREX2         | chr8  | 68989671/G//A    | nonsynonymous | 1 | 0 |
|               | chr8  | 69017372/G//C    | synonymous    | 1 | 0 |
| RIMS2         | chr8  | 104898339/C//T   | synonymous    | 1 | 0 |
| NOV           | chr8  | 120430477/C//G   | nonsynonymous | 1 | 0 |
| ATAD2         | chr8  | 124373857/G//A   | nonsynonymous | 1 | 0 |
| GSDMD         | chr8  | 144645026/C//A   | synonymous    | 1 | 0 |
| SCRIB         | chr8  | 144892707/CG//C  | nonsynonymous | 1 | 0 |
| SPATA31C2     | chr9  | 90744737/G//A    | nonsynonymous | 1 | 0 |
| GABBR2        | chr9  | 101216287/G//A   | synonymous    | 1 | 0 |
| ACTL7B        | chr9  | 111617355/C//T   | nonsynonymous | 1 | 0 |
| KIAA0368      | chr9  | 114133004/G//T   | nonsynonymous | 1 | 0 |
| ALAD          | chr9  | 116152915/G//A   | nonsynonymous | 1 | 0 |
| CRB2          | chr9  | 126139326/GGA//G | nonsynonymous | 1 | 0 |
| C9orf116      | chr9  | 138387410/C//T   | nonsynonymous | 1 | 0 |
| CACNA1B       | chr9  | 140777318/C//T   | synonymous    | 1 | 0 |
| EIF4G2        | chr11 | 10821740/A//T    | synonymous    | 1 | 0 |
| KIAA1549L     | chr11 | 33689765/C//T    | synonymous    | 1 | 0 |
| OR9Q1         | chr11 | 57947504/A//T    | nonsynonymous | 1 | 0 |
| PC            | chr11 | 66618659/G//A    | nonsynonymous | 1 | 0 |
| MMP3          | chr11 | 102713419/T//C   | nonsynonymous | 1 | 0 |
| DYNC2H1       | chr11 | 103019219/C//G   | nonsynonymous | 1 | 0 |
| AKAP3         | chr12 | 4737680/G//A     | nonsynonymous | 1 | 0 |
| PZP           | chr12 | 9304216/A//T     | nonsynonymous | 1 | 0 |
| KLRF2         | chr12 | 10034123/T//C    | synonymous    | 1 | 0 |
| TMEM52B       | chr12 | 10342711/C//T    | nonsynonymous | 1 | 0 |
| ST8SIA1       | chr12 | 22354566/G//A    | nonsynonymous | 1 | 0 |
| PCBP2         | chr12 | 53848633/C//T    | nonsynonymous | 1 | 0 |
| NEUROD4       | chr12 | 55420486/G//A    | nonsynonymous | 1 | 0 |
| SLC35E3       | chr12 | 69140486/C//G    | nonsynonymous | 1 | 0 |
| NTS           | chr12 | 86272114/AT//A   | synonymous    | 1 | 0 |
| SH2B3         | chr12 | 111856332/G//A   | nonsynonymous | 1 | 0 |
| SRRM4         | chr12 | 119540063/G//A   | nonsynonymous | 1 | 0 |
| TUBA3C        | chr13 | 19748274/G//A    | nonsynonymous | 1 | 0 |
| NBEA          | chr13 | 35738655/T//C    | synonymous    | 1 | 0 |
| ITGBL1        | chr13 | 102220122/C//A   | nonsynonymous | 1 | 0 |
| RPGRIP1       | chr14 | 21796637/A//G    | nonsynonymous | 1 | 0 |
| MYH7          | chr14 | 23884924/C//T    | nonsynonymous | 1 | 0 |
| CLEC14A       | chr14 | 38724681/G//T    | nonsynonymous | 1 | 0 |
| FAM181A       | chr14 | 94395253/G//A    | nonsynonymous | 1 | 0 |
| INO80         | chr15 | 41346203/G//T    | nonsynonymous | 1 | 0 |
| EHD4          | chr15 | 42192954/C//T    | synonymous    | 1 | 0 |
| CALML4        | chr15 | 68486344/TCTC//T | synonymous    | 1 | 0 |
| SEMA7A        | chr15 | 74710642/G//A    | synonymous    | 1 | 0 |
| PKD1L3        | chr16 | 72016031/G//C    | nonsynonymous | 1 | 0 |
| ADAMTS18      | chr16 | 77328857/G//T    | nonsynonymous | 1 | 0 |
| PKD1L2        | chr16 | 81183469/C//T    | nonsynonymous | 1 | 0 |
| RFLNB         | chr17 | 293115/C//T      | nonsynonymous | 1 | 0 |
| TP53          | chr17 | 7578265/A//T     | nonsynonymous | 1 | 0 |
| SPECC1        | chr17 | 20013829/C//T    | synonymous    | 1 | 0 |
| RAD51D        | chr17 | 33434077/G//C    | nonsynonymous | 1 | 0 |
| FDXR          | chr17 | 72869017/C//T    | nonsynonymous | 1 | 0 |
| NOTUM         | chr17 | 79914595/G//A    | nonsynonymous | 1 | 0 |
| VAPA          | chr18 | 9937043/C//T     | nonsynonymous | 1 | 0 |
| TUBB6         | chr18 | 12325216/C//T    | nonsynonymous | 1 | 0 |
| SALL3         | chr18 | 76754490/G//A    | synonymous    | 1 | 0 |
| SPPL2B        | chr19 | 2352960/C//T     | nonsynonymous | 1 | 0 |
| ZNF77         | chr19 | 2944926/C//T     | synonymous    | 1 | 0 |
| MUC16         | chr19 | 9062874/A//T     | nonsynonymous | 1 | 0 |
| ZNF559-ZNF177 | chr19 | 9489725/G//T     | nonsynonymous | 1 | 0 |
| SMARCA4       | chr19 | 11152080/C//T    | nonsynonymous | 1 | 0 |
| ZNF708        | chr19 | 21476148/G//A    | synonymous    | 1 | 0 |
| ZNF99         | chr19 | 22940767/G//T    | synonymous    | 1 | 0 |
| CCNE1         | chr19 | 30314573/A//C    | synonymous    | 1 | 0 |
| ZNF568        | chr19 | 37441173/G//A    | nonsynonymous | 1 | 0 |
| PRR12         | chr19 | 50098446/A//G    | nonsynonymous | 1 | 0 |

|          |       |                    |               |   |   |
|----------|-------|--------------------|---------------|---|---|
| MED25    | chr19 | 50338372/C//T      | nonsynonymous | 1 | 0 |
| MYH14    | chr19 | 50783514/G//T      | synonymous    | 1 | 0 |
| ZNF480   | chr19 | 52819101/G//C      | nonsynonymous | 1 | 0 |
| THBD     | chr20 | 23028840/G//A      | synonymous    | 1 | 0 |
| ITCH     | chr20 | 33000446/G//A      | nonsynonymous | 1 | 0 |
| CBLN4    | chr20 | 54575882/A//C      | nonsynonymous | 1 | 0 |
| SPATC1L  | chr21 | 47581472/A//G      | nonsynonymous | 1 | 0 |
| CABIN1   | chr22 | 24459603/G//A      | synonymous    | 1 | 0 |
| CABIN1   | chr22 | 24483532/C//T      | nonsynonymous | 1 | 0 |
| HMGXB4   | chr22 | 35659824/CAAG//C   | nonsynonymous | 1 | 0 |
| CSF2RA   | chrX  | 1407701/G//A       | synonymous    | 1 | 0 |
| MAP7D2   | chrX  | 20071097/T//C      | nonsynonymous | 1 | 0 |
| IL1RAPL1 | chrX  | 29301060/G//T      | nonsynonymous | 1 | 0 |
| CACNA1F  | chrX  | 49066800/A//T      | nonsynonymous | 1 | 0 |
| WNK3     | chrX  | 54319643/G//A      | nonsynonymous | 1 | 0 |
| CYSLTR1  | chrX  | 77528882/C//T      | nonsynonymous | 1 | 0 |
| RHOXF1   | chrX  | 119249555/C//T     | nonsynonymous | 1 | 0 |
| INTS6L   | chrX  | 134683628/T//A     | nonsynonymous | 1 | 0 |
| SLC9A6   | chrX  | 135104829/A//G     | nonsynonymous | 1 | 0 |
| CDK11A   | chr1  | 1636044/G//A       | synonymous    | 0 | 1 |
| UBR4     | chr1  | 19524187/T//C      | synonymous    | 0 | 1 |
| HNRNPR   | chr1  | 23637496/A//G      | synonymous    | 0 | 1 |
| EPHA10   | chr1  | 38227322/A//T      | nonsynonymous | 0 | 1 |
| INPP5B   | chr1  | 38341385/T//C      | nonsynonymous | 0 | 1 |
| SLC44A5  | chr1  | 75693487/T//C      | synonymous    | 0 | 1 |
|          | chr1  | 170993788/A//G     | synonymous    | 0 | 1 |
| PPP4R3B  | chr2  | 55825749/A//C      | nonsynonymous | 0 | 1 |
| DYSF     | chr2  | 71886082/C//T      | synonymous    | 0 | 1 |
| FER1L5   | chr2  | 97359277/C//T      | synonymous    | 0 | 1 |
| SLC9A2   | chr2  | 103324704/A//G     | nonsynonymous | 0 | 1 |
| SATB1    | chr3  | 18419810/G//C      | nonsynonymous | 0 | 1 |
| TRIM71   | chr3  | 32932914/G//A      | nonsynonymous | 0 | 1 |
| SLC22A14 | chr3  | 38357834/G//A      | nonsynonymous | 0 | 1 |
| DHX30    | chr3  | 47888361/C//T      | nonsynonymous | 0 | 1 |
| HYAL1    | chr3  | 50339817/G//A      | nonsynonymous | 0 | 1 |
| LRRIQ4   | chr3  | 169540417/G//T     | synonymous    | 0 | 1 |
| DCLK2    | chr4  | 151023666/G//A     | nonsynonymous | 0 | 1 |
| TENM3    | chr4  | 183696257/G//A     | nonsynonymous | 0 | 1 |
| TENM3    | chr4  | 183717885/G//A     | nonsynonymous | 0 | 1 |
| APC      | chr5  | 112174112/G//T     | nonsynonymous | 0 | 1 |
| SEMA6A   | chr5  | 115783402/C//A     | nonsynonymous | 0 | 1 |
| PCDHA10  | chr5  | 140236799/C//T     | nonsynonymous | 0 | 1 |
| PCDHB6   | chr5  | 140530024/C//T     | synonymous    | 0 | 1 |
| DOCK2    | chr5  | 169267790/C//G     | nonsynonymous | 0 | 1 |
| RIMS1    | chr6  | 72984080/A//G      | nonsynonymous | 0 | 1 |
| COL12A1  | chr6  | 75861712/T//G      | synonymous    | 0 | 1 |
| CNR1     | chr6  | 88854742/CTTG//C   | nonsynonymous | 0 | 1 |
| DDO      | chr6  | 110736701/C//G     | nonsynonymous | 0 | 1 |
| ROS1     | chr6  | 117678052/T//C     | nonsynonymous | 0 | 1 |
| SYNE1    | chr6  | 152638096/T//C     | nonsynonymous | 0 | 1 |
|          | chr7  | 20698739/G//A      | synonymous    | 0 | 1 |
| TMEM120A | chr7  | 75616861/CAAAGA//C | nonsynonymous | 0 | 1 |
| MOSPD3   | chr7  | 100211195/T//TC    | nonsynonymous | 0 | 1 |
| RELN     | chr7  | 103290763/G//T     | nonsynonymous | 0 | 1 |
| DGKI     | chr7  | 137092652/G//A     | synonymous    | 0 | 1 |
| TRPV5    | chr7  | 142627220/C//T     | synonymous    | 0 | 1 |
| PSD3     | chr8  | 18432710/G//A      | nonsynonymous | 0 | 1 |
| TRPA1    | chr8  | 72963036/C//G      | nonsynonymous | 0 | 1 |
| HHLA1    | chr8  | 133111180/C//G     | nonsynonymous | 0 | 1 |
| RECK     | chr9  | 36087884/A//G      | synonymous    | 0 | 1 |
| NOL8     | chr9  | 95063881/C//T      | nonsynonymous | 0 | 1 |
| ST8SIA6  | chr10 | 17363105/G//A      | synonymous    | 0 | 1 |
| MYO3A    | chr10 | 26357710/A//G      | nonsynonymous | 0 | 1 |
| UNC5B    | chr10 | 73047427/G//A      | nonsynonymous | 0 | 1 |
| CNGA4    | chr11 | 6261702/G//A       | synonymous    | 0 | 1 |
| UBTFL1   | chr11 | 89819402/C//T      | synonymous    | 0 | 1 |
| APLP2    | chr11 | 129979322/A//G     | nonsynonymous | 0 | 1 |
| GRIN2B   | chr12 | 13715772/C//T      | nonsynonymous | 0 | 1 |
| PIK3C2G  | chr12 | 18573933/G//T      | nonsynonymous | 0 | 1 |
| FAM186A  | chr12 | 50745501/A//G      | nonsynonymous | 0 | 1 |

|              |       |                            |               |   |   |
|--------------|-------|----------------------------|---------------|---|---|
| DIP2B        | chr12 | 51126148/G//A              | nonsynonymous | 0 | 1 |
| KRT78        | chr12 | 53242613/G//A              | synonymous    | 0 | 1 |
| TAOK3        | chr12 | 118619344/C//T             | synonymous    | 0 | 1 |
| EP400        | chr12 | 132514584/C//T             | nonsynonymous | 0 | 1 |
| ZMYM2        | chr13 | 20567940/C//A              | nonsynonymous | 0 | 1 |
| OR4K5        | chr14 | 20389501/G//A              | nonsynonymous | 0 | 1 |
| LRFN5        | chr14 | 42356190/G//A              | nonsynonymous | 0 | 1 |
| ATP10A       | chr15 | 25924588/G//A              | nonsynonymous | 0 | 1 |
| WFIKKN1      | chr16 | 682751/G//A                | nonsynonymous | 0 | 1 |
| GGA2         | chr16 | 23507075/G//T              | nonsynonymous | 0 | 1 |
| GGA2         | chr16 | 23507084/G//C              | nonsynonymous | 0 | 1 |
| SETD1A       | chr16 | 30991093/G//T              | nonsynonymous | 0 | 1 |
| ZCCHC14      | chr16 | 87446278/T//TCTTGGTCCAGATC | nonsynonymous | 0 | 1 |
| TP53         | chr17 | 7578406/C//T               | nonsynonymous | 0 | 1 |
|              | chr17 | 17494838/T//C              | synonymous    | 0 | 1 |
| RAB11FIP4    | chr17 | 29758896/C//T              | synonymous    | 0 | 1 |
| ASIC2        | chr17 | 31350871/A//G              | synonymous    | 0 | 1 |
| SLC35B1      | chr17 | 47782525/C//A              | synonymous    | 0 | 1 |
| SGCA         | chr17 | 48245851/G//A              | nonsynonymous | 0 | 1 |
| ABCC3        | chr17 | 48741063/C//A              | synonymous    | 0 | 1 |
| ACE          | chr17 | 61570998/G//C              | synonymous    | 0 | 1 |
| ZNF560       | chr19 | 9577745/C//A               | nonsynonymous | 0 | 1 |
| MYO9B        | chr19 | 17314069/T//C              | nonsynonymous | 0 | 1 |
| MVB12A       | chr19 | 17531383/G//T              | nonsynonymous | 0 | 1 |
| SPTBN4       | chr19 | 41074188/G//A              | nonsynonymous | 0 | 1 |
| GNAS         | chr20 | 57485013/C//T              | nonsynonymous | 0 | 1 |
| TPTE         | chr21 | 10944666/A//G              | nonsynonymous | 0 | 1 |
| KRTAP10-4    | chr21 | 45994562/C//A              | synonymous    | 0 | 1 |
| CHEK2        | chr22 | 29099506/T//C              | nonsynonymous | 0 | 1 |
| DMC1         | chr22 | 38934572/T//C              | nonsynonymous | 0 | 1 |
| DMBX1        | chr1  | 46972694/C//T              | synonymous    | 0 | 1 |
| VANGL1       | chr1  | 116226705/G//T             | synonymous    | 0 | 1 |
| NHLH1        | chr1  | 160340559/C//T             | nonsynonymous | 0 | 1 |
| USH2A        | chr1  | 215812555/C//T             | synonymous    | 0 | 1 |
| RNASEH1      | chr2  | 3599780/G//A               | synonymous    | 0 | 1 |
| HADHA        | chr2  | 26426986/G//A              | nonsynonymous | 0 | 1 |
| BIRC6        | chr2  | 32743931/A//G              | synonymous    | 0 | 1 |
| LTBP1        | chr2  | 33246007/G//A              | synonymous    | 0 | 1 |
| PCBP1        | chr2  | 70315174/T//C              | nonsynonymous | 0 | 1 |
| CNTNAP5      | chr2  | 125261907/G//T             | synonymous    | 0 | 1 |
| SCN9A        | chr2  | 167145057/C//A             | nonsynonymous | 0 | 1 |
| HOXD3        | chr2  | 177036312/C//T             | synonymous    | 0 | 1 |
| UNC80        | chr2  | 210704065/C//T             | nonsynonymous | 0 | 1 |
| WNT10A       | chr2  | 219758132/C//T             | synonymous    | 0 | 1 |
| CFAP65       | chr2  | 219886994/T//C             | nonsynonymous | 0 | 1 |
| SEMA5B       | chr3  | 122645390/G//A             | nonsynonymous | 0 | 1 |
| PLXNA1       | chr3  | 126748890/C//T             | nonsynonymous | 0 | 1 |
| MUC4         | chr3  | 195477812/G//A             | synonymous    | 0 | 1 |
| KIAA1109     | chr4  | 123192328/A//G             | nonsynonymous | 0 | 1 |
| PLEKHG4B     | chr5  | 181731/G//A                | nonsynonymous | 0 | 1 |
| EMB          | chr5  | 49698158/G//T              | synonymous    | 0 | 1 |
| KIF4B        | chr5  | 154394116/C//T             | nonsynonymous | 0 | 1 |
| NIPAL4       | chr5  | 156899709/G//T             | nonsynonymous | 0 | 1 |
| GRK6         | chr5  | 176863196/C//T             | nonsynonymous | 0 | 1 |
| ANKS1A       | chr6  | 35047713/G//A              | synonymous    | 0 | 1 |
| RSPO3        | chr6  | 127517142/C//A             | nonsynonymous | 0 | 1 |
| AGMO         | chr7  | 15405785/A//G              | synonymous    | 0 | 1 |
| PIP          | chr7  | 142832356/G//A             | synonymous    | 0 | 1 |
| SSPO         | chr7  | 149474416/C//T             | nonsynonymous | 0 | 1 |
| RHEB         | chr7  | 151167740/T//C             | nonsynonymous | 0 | 1 |
| FAM110B      | chr8  | 59059801/G//A              | nonsynonymous | 0 | 1 |
| COL22A1      | chr8  | 139895349/C//T             | nonsynonymous | 0 | 1 |
| PLEC         | chr8  | 145011337/C//T             | nonsynonymous | 0 | 1 |
| LCN9         | chr9  | 138555254/C//T             | synonymous    | 0 | 1 |
| CACNA1B      | chr9  | 140846741/G//A             | nonsynonymous | 0 | 1 |
| KIF5B        | chr10 | 32337435/A//G              | synonymous    | 0 | 1 |
| B3GAT3       | chr11 | 62388113/C//T              | nonsynonymous | 0 | 1 |
| LOC105369332 | chr11 | 62601218/G//A              | synonymous    | 0 | 1 |
| KCNK4        | chr11 | 64060485/C//A              | synonymous    | 0 | 1 |
| EMSY         | chr11 | 76248847/A//C              | nonsynonymous | 0 | 1 |

|           |       |                     |               |   |   |
|-----------|-------|---------------------|---------------|---|---|
|           | chr11 | 105836750/G//A      | synonymous    | 0 | 1 |
| LRRK2     | chr12 | 40716198/G//T       | nonsynonymous | 0 | 1 |
| NCKAP5L   | chr12 | 50188879/C//T       | nonsynonymous | 0 | 1 |
| LYZ       | chr12 | 69746964/G//T       | nonsynonymous | 0 | 1 |
| UBE3B     | chr12 | 109967795/G//A      | nonsynonymous | 0 | 1 |
| MAPKAPK5  | chr12 | 112326720/G//A      | nonsynonymous | 0 | 1 |
| GALNT9    | chr12 | 132685702/C//A      | nonsynonymous | 0 | 1 |
| MPHOSPH8  | chr13 | 20224261/C//T       | synonymous    | 0 | 1 |
| MTUS2     | chr13 | 29933548/C//A       | nonsynonymous | 0 | 1 |
|           | chr14 | 100341280/T//G      | synonymous    | 0 | 1 |
| ZNF609    | chr15 | 64970645/C//T       | nonsynonymous | 0 | 1 |
| NGRN      | chr15 | 90809548/C//A       | synonymous    | 0 | 1 |
| PITPNM3   | chr17 | 6377928/C//T        | synonymous    | 0 | 1 |
| MEIOC     | chr17 | 42750761/C//T       | nonsynonymous | 0 | 1 |
| RSAD1     | chr17 | 48557446/G//A       | nonsynonymous | 0 | 1 |
| TRIM65    | chr17 | 73886916/A//G       | nonsynonymous | 0 | 1 |
| DLGAP1    | chr18 | 3879542/G//A        | nonsynonymous | 0 | 1 |
| DSG1      | chr18 | 28935130/C//A       | nonsynonymous | 0 | 1 |
| LOXHD1    | chr18 | 44140268/C//T       | nonsynonymous | 0 | 1 |
| CNDP1     | chr18 | 72250924/G//A       | synonymous    | 0 | 1 |
| FBXL12    | chr19 | 9922085/G//T        | synonymous    | 0 | 1 |
| LDLR      | chr19 | 11223997/G//A       | synonymous    | 0 | 1 |
| CYP4F3    | chr19 | 15769553/G//A       | nonsynonymous | 0 | 1 |
| ZNF14     | chr19 | 19823119/G//A       | nonsynonymous | 0 | 1 |
| FCGBP     | chr19 | 40366143/G//A       | synonymous    | 0 | 1 |
| ATF5      | chr19 | 50436236/C//T       | nonsynonymous | 0 | 1 |
| ZNF415    | chr19 | 53612491/C//A       | nonsynonymous | 0 | 1 |
| KIR3DL2   | chr19 | 55363712/C//A       | nonsynonymous | 0 | 1 |
| KIR3DL2   | chr19 | 55365342/C//T       | nonsynonymous | 0 | 1 |
| NKX2-4    | chr20 | 21377055/C//T       | nonsynonymous | 0 | 1 |
| REM1      | chr20 | 30071987/C//T       | synonymous    | 0 | 1 |
| KRTAP26-1 | chr21 | 31692266/A//G       | nonsynonymous | 0 | 1 |
| ELFN2     | chr22 | 37770921/C//T       | synonymous    | 0 | 1 |
| AMER1     | chrX  | 63411576/G//A       | nonsynonymous | 0 | 1 |
| SAGE1     | chrX  | 134978399/C//A      | synonymous    | 0 | 1 |
| GPR50     | chrX  | 150348341/C//A      | nonsynonymous | 0 | 1 |
| HSPG2     | chr1  | 22199551/T//C       | nonsynonymous | 1 | 0 |
| DHDDS     | chr1  | 26786593/C//T       | synonymous    | 1 | 0 |
| THEMIS2   | chr1  | 28212387/A//C       | nonsynonymous | 1 | 0 |
| ZCCHC17   | chr1  | 31821732/C//T       | nonsynonymous | 1 | 0 |
| PHC2      | chr1  | 33832876/G//A       | nonsynonymous | 1 | 0 |
| LRRIQ3    | chr1  | 74507272/A//C       | nonsynonymous | 1 | 0 |
| BCL9      | chr1  | 147091996/C//T      | nonsynonymous | 1 | 0 |
| LRRC52    | chr1  | 165532949/G//A      | nonsynonymous | 1 | 0 |
| RC3H1     | chr1  | 173931152/T//C      | nonsynonymous | 1 | 0 |
| TOR3A     | chr1  | 179054984/G//A      | nonsynonymous | 1 | 0 |
| MARK1     | chr1  | 220826478/C//T      | nonsynonymous | 1 | 0 |
| PARP1     | chr1  | 226576444/G//A      | synonymous    | 1 | 0 |
| TPO       | chr2  | 1481150/C//T        | nonsynonymous | 1 | 0 |
| RNASEH1   | chr2  | 3605795/C//T        | nonsynonymous | 1 | 0 |
| EHD3      | chr2  | 31467209/G//A       | synonymous    | 1 | 0 |
| CTNNA2    | chr2  | 80782972/T//A       | synonymous    | 1 | 0 |
| IL1RL1    | chr2  | 102968037/C//T      | nonsynonymous | 1 | 0 |
| POTEF     | chr2  | 130877752/T//C      | nonsynonymous | 1 | 0 |
| ACVR2A    | chr2  | 148684725/TAGGTG//T | nonsynonymous | 1 | 0 |
| TTN       | chr2  | 179478950/C//A      | nonsynonymous | 1 | 0 |
| SPHKAP    | chr2  | 228881614/C//T      | nonsynonymous | 1 | 0 |
| PDE6D     | chr2  | 232602764/C//T      | nonsynonymous | 1 | 0 |
| IL5RA     | chr3  | 3146655/G//A        | nonsynonymous | 1 | 0 |
| VGLL4     | chr3  | 11643490/G//A       | nonsynonymous | 1 | 0 |
| TRANK1    | chr3  | 36897248/G//A       | nonsynonymous | 1 | 0 |
| ACKR2     | chr3  | 42906001/G//A       | nonsynonymous | 1 | 0 |
| DCAF1     | chr3  | 51451440/C//T       | nonsynonymous | 1 | 0 |
| EPHA6     | chr3  | 97202787/C//A       | nonsynonymous | 1 | 0 |
| TFDP2     | chr3  | 141682808/G//C      | synonymous    | 1 | 0 |
| TMPRSS11A | chr4  | 68777170/G//T       | nonsynonymous | 1 | 0 |
| GK2       | chr4  | 80329159/C//T       | nonsynonymous | 1 | 0 |
| MTTP      | chr4  | 100529959/C//T      | nonsynonymous | 1 | 0 |
| NFKB1     | chr4  | 103517422/C//T      | synonymous    | 1 | 0 |
| PCDH10    | chr4  | 134071730/C//T      | synonymous    | 1 | 0 |



|           |       |                |               |   |   |
|-----------|-------|----------------|---------------|---|---|
| EDNRA     | chr4  | 148441044/C//T | synonymous    | 1 | 0 |
| TDO2      | chr4  | 156831221/G//A | nonsynonymous | 1 | 0 |
| SORBS2    | chr4  | 186545448/C//T | nonsynonymous | 1 | 0 |
| TPPP      | chr5  | 665227/C//T    | nonsynonymous | 1 | 0 |
| APC       | chr5  | 112116511/A//T | nonsynonymous | 1 | 0 |
| APC       | chr5  | 112175621/C//T | nonsynonymous | 1 | 0 |
| PCDHA6    | chr5  | 140207946/C//T | synonymous    | 1 | 0 |
| PCDHA10   | chr5  | 140237804/C//T | nonsynonymous | 1 | 0 |
| PCDHA12   | chr5  | 140256419/G//A | synonymous    | 1 | 0 |
| FOX11     | chr5  | 169533108/C//T | synonymous    | 1 | 0 |
| FOX11     | chr5  | 169535586/C//T | nonsynonymous | 1 | 0 |
| HMP19     | chr5  | 173534413/G//A | nonsynonymous | 1 | 0 |
| GPLD1     | chr6  | 24437453/G//A  | synonymous    | 1 | 0 |
| ADGRB3    | chr6  | 69703861/G//T  | synonymous    | 1 | 0 |
| COL19A1   | chr6  | 70866045/T//A  | nonsynonymous | 1 | 0 |
| SIM1      | chr6  | 100897265/C//T | nonsynonymous | 1 | 0 |
| GPR6      | chr6  | 110300314/C//T | synonymous    | 1 | 0 |
| ENPP1     | chr6  | 132173319/G//C | nonsynonymous | 1 | 0 |
| SLC35D3   | chr6  | 137245157/G//A | nonsynonymous | 1 | 0 |
| ADGB      | chr6  | 147045335/C//A | nonsynonymous | 1 | 0 |
| CARD11    | chr7  | 2983996/C//T   | synonymous    | 1 | 0 |
| ADCY1     | chr7  | 45717490/C//T  | nonsynonymous | 1 | 0 |
| SEMA3E    | chr7  | 83016364/C//T  | nonsynonymous | 1 | 0 |
| SEMA3A    | chr7  | 83764138/T//A  | nonsynonymous | 1 | 0 |
|           | chr7  | 94913395/G//A  | synonymous    | 1 | 0 |
| TMEM130   | chr7  | 98460911/G//A  | synonymous    | 1 | 0 |
| RELN      | chr7  | 103180705/C//T | nonsynonymous | 1 | 0 |
| TRPV6     | chr7  | 142573516/G//A | nonsynonymous | 1 | 0 |
| NOBOX     | chr7  | 144097333/G//A | nonsynonymous | 1 | 0 |
| ZFH4      | chr8  | 77617406/C//T  | synonymous    | 1 | 0 |
| MMP16     | chr8  | 89086977/A//C  | synonymous    | 1 | 0 |
| CYP11B1   | chr8  | 143957721/G//A | nonsynonymous | 1 | 0 |
| PCSK5     | chr9  | 78854084/A//G  | synonymous    | 1 | 0 |
| SPATA31C1 | chr9  | 90535953/G//A  | synonymous    | 1 | 0 |
| CYLC2     | chr9  | 105767662/A//T | nonsynonymous | 1 | 0 |
| SLC2A6    | chr9  | 136341428/C//T | nonsynonymous | 1 | 0 |
| PROSER2   | chr10 | 11912287/G//A  | nonsynonymous | 1 | 0 |
| GJD4      | chr10 | 35896751/G//A  | nonsynonymous | 1 | 0 |
|           | chr10 | 64239692/G//T  | synonymous    | 1 | 0 |
| PNLIPRP3  | chr10 | 118220557/C//T | synonymous    | 1 | 0 |
| TUBGCP2   | chr10 | 135096577/C//T | synonymous    | 1 | 0 |
| RAG1      | chr11 | 36596118/G//A  | nonsynonymous | 1 | 0 |
| CREB3L1   | chr11 | 46342370/C//T  | synonymous    | 1 | 0 |
| TMEM151A  | chr11 | 66062222/C//T  | nonsynonymous | 1 | 0 |
| LRR32     | chr11 | 76371781/C//A  | nonsynonymous | 1 | 0 |
| ANKK1     | chr11 | 113270181/C//T | nonsynonymous | 1 | 0 |
| PRICKLE1  | chr12 | 42853583/T//C  | synonymous    | 1 | 0 |
| GALNT4    | chr12 | 89916549/T//C  | synonymous    | 1 | 0 |
| CAMKK2    | chr12 | 121686496/C//T | synonymous    | 1 | 0 |
| MMP17     | chr12 | 132326315/G//A | nonsynonymous | 1 | 0 |
| SPERT     | chr13 | 46287785/C//T  | nonsynonymous | 1 | 0 |
| DLEU7     | chr13 | 51417861/G//A  | synonymous    | 1 | 0 |
| PCDH17    | chr13 | 58208595/G//A  | nonsynonymous | 1 | 0 |
| SLC10A2   | chr13 | 103718272/T//C | nonsynonymous | 1 | 0 |
| COL4A2    | chr13 | 111164495/G//A | nonsynonymous | 1 | 0 |
| ATP11A    | chr13 | 113487324/G//A | nonsynonymous | 1 | 0 |
| HECTD1    | chr14 | 31576189/GT//G | nonsynonymous | 1 | 0 |
| TTLL5     | chr14 | 76249837/A//T  | nonsynonymous | 1 | 0 |
| AHNAK2    | chr14 | 105414243/G//A | synonymous    | 1 | 0 |
| ALPK3     | chr15 | 85370777/C//T  | nonsynonymous | 1 | 0 |
| RHCG      | chr15 | 90022647/C//T  | nonsynonymous | 1 | 0 |
| IGF1R     | chr15 | 99465479/G//A  | synonymous    | 1 | 0 |
| METRN     | chr16 | 767278/G//A    | nonsynonymous | 1 | 0 |
| LCMT1     | chr16 | 25123284/G//A  | nonsynonymous | 1 | 0 |
| KIF22     | chr16 | 29810609/C//G  | nonsynonymous | 1 | 0 |
| PKD1L3    | chr16 | 72001870/C//T  | nonsynonymous | 1 | 0 |
| DHODH     | chr16 | 72045954/G//C  | synonymous    | 1 | 0 |
| SLFN13    | chr17 | 33768598/G//A  | synonymous    | 1 | 0 |
| KIF18B    | chr17 | 43009581/G//A  | synonymous    | 1 | 0 |
| CRHR1     | chr17 | 43861938/G//A  | nonsynonymous | 1 | 0 |

|          |       |                  |               |   |   |
|----------|-------|------------------|---------------|---|---|
| PDK2     | chr17 | 48172713/G//A    | synonymous    | 1 | 0 |
| MGAT5B   | chr17 | 74942515/G//A    | nonsynonymous | 1 | 0 |
| PIGN     | chr18 | 59805519/G//C    | nonsynonymous | 1 | 0 |
| NETO1    | chr18 | 70526183/C//T    | nonsynonymous | 1 | 0 |
| DPP9-AS1 | chr19 | 4683019/C//T     | nonsynonymous | 1 | 0 |
| TUBB4A   | chr19 | 6496178/T//C     | nonsynonymous | 1 | 0 |
| MUC16    | chr19 | 9007540/G//A     | nonsynonymous | 1 | 0 |
| RGL3     | chr19 | 11516009/C//G    | nonsynonymous | 1 | 0 |
| DPF1     | chr19 | 38702616/C//T    | synonymous    | 1 | 0 |
| RYR1     | chr19 | 38960106/G//T    | nonsynonymous | 1 | 0 |
| AXL      | chr19 | 41748815/C//T    | nonsynonymous | 1 | 0 |
| DMPK     | chr19 | 46274894/C//T    | nonsynonymous | 1 | 0 |
| EHD2     | chr19 | 48220206/G//A    | nonsynonymous | 1 | 0 |
| ZNF577   | chr19 | 52376037/T//C    | synonymous    | 1 | 0 |
| ZNF432   | chr19 | 52537864/T//C    | synonymous    | 1 | 0 |
| SEC23B   | chr20 | 18523798/C//G    | nonsynonymous | 1 | 0 |
| GNAS     | chr20 | 57484421/G//A    | nonsynonymous | 1 | 0 |
| ZNF831   | chr20 | 57766932/G//A    | synonymous    | 1 | 0 |
| SMTN     | chr22 | 31492844/G//A    | nonsynonymous | 1 | 0 |
| TTLL1    | chr22 | 43442433/G//A    | synonymous    | 1 | 0 |
| CFAP47   | chrX  | 36091427/T//C    | nonsynonymous | 1 | 0 |
| TAF9B    | chrX  | 77387107/T//A    | nonsynonymous | 1 | 0 |
| LPAR4    | chrX  | 78010673/C//T    | nonsynonymous | 1 | 0 |
| POU3F4   | chrX  | 82764372/T//C    | nonsynonymous | 1 | 0 |
| KLHL4    | chrX  | 86872940/C//A    | nonsynonymous | 1 | 0 |
| PRR32    | chrX  | 125954664/C//T   | nonsynonymous | 1 | 0 |
| NES      | chr1  | 156639520/G//A   | nonsynonymous | 0 | 1 |
| B4GALT3  | chr1  | 161143523/G//A   | synonymous    | 0 | 1 |
| TGFB2    | chr1  | 218609331/A//G   | synonymous    | 0 | 1 |
| LRP1B    | chr2  | 140990784/C//A   | nonsynonymous | 0 | 1 |
| SEMA3F   | chr3  | 50220861/T//C    | nonsynonymous | 0 | 1 |
| UROC1    | chr3  | 126229551/G//A   | synonymous    | 0 | 1 |
| KLKB1    | chr4  | 187177207/T//C   | synonymous    | 0 | 1 |
| TMEM232  | chr5  | 109954212/A//T   | nonsynonymous | 0 | 1 |
| THSD7A   | chr7  | 11521483/C//T    | nonsynonymous | 0 | 1 |
| ETV1     | chr7  | 13940432/C//T    | synonymous    | 0 | 1 |
| KLF10    | chr8  | 103663846/C//A   | synonymous    | 0 | 1 |
| KRTAP5-3 | chr11 | 1629052/G//A     | synonymous    | 0 | 1 |
| BTBD18   | chr11 | 57512864/C//A    | nonsynonymous | 0 | 1 |
| MT1F     | chr16 | 56692659/G//A    | synonymous    | 0 | 1 |
| CHST4    | chr16 | 71571421/C//T    | nonsynonymous | 0 | 1 |
| EVI2A    | chr17 | 29645961/A//G    | nonsynonymous | 0 | 1 |
| RBM28    | chr7  | 127983751/A//G   | nonsynonymous | 1 | 0 |
| ZNF462   | chr9  | 109689505/C//T   | synonymous    | 1 | 0 |
| ZNF385C  | chr17 | 40179712/G//T    | nonsynonymous | 1 | 0 |
| ZNF729   | chr19 | 22499446/G//A    | nonsynonymous | 1 | 0 |
| LRFN3    | chr19 | 36431240/C//T    | synonymous    | 1 | 0 |
| ITPKC    | chr19 | 41223707/T//C    | nonsynonymous | 1 | 0 |
| OFD1     | chrX  | 13753162/A//G    | synonymous    | 1 | 0 |
| PIK3CD   | chr1  | 9780821/C//G     | nonsynonymous | 0 | 1 |
| PUS10    | chr2  | 61180171/C//T    | synonymous    | 0 | 1 |
| RBM45    | chr2  | 178981080/A//G   | nonsynonymous | 0 | 1 |
| ARHGEF3  | chr3  | 56785365/AAT//A  | nonsynonymous | 0 | 1 |
| SEC24D   | chr4  | 119644815/G//C   | synonymous    | 0 | 1 |
| LRRN3    | chr7  | 110764067/G//T   | nonsynonymous | 0 | 1 |
| MKRN1    | chr7  | 140171736/A//G   | synonymous    | 0 | 1 |
| SOX17    | chr8  | 55371625/G//A    | synonymous    | 0 | 1 |
| THRSP    | chr11 | 77775015/G//A    | nonsynonymous | 0 | 1 |
| ALKBH8   | chr11 | 107431552/ATC//A | nonsynonymous | 0 | 1 |
| FAM124A  | chr13 | 51855360/G//A    | nonsynonymous | 0 | 1 |
| DIAPH3   | chr13 | 60385061/A//C    | synonymous    | 0 | 1 |
| ZNF729   | chr19 | 22499505/G//A    | nonsynonymous | 0 | 1 |
| FIZ1     | chr19 | 56103904/C//T    | nonsynonymous | 0 | 1 |
| C1D      | chr2  | 68273161/G//A    | nonsynonymous | 0 | 1 |
| NEK10    | chr3  | 27337127/C//T    | nonsynonymous | 0 | 1 |
| ZNF860   | chr3  | 32031962/A//G    | nonsynonymous | 0 | 1 |
| INTU     | chr4  | 128637633/A//G   | synonymous    | 0 | 1 |
| NPC1L1   | chr7  | 44578771/G//C    | nonsynonymous | 0 | 1 |
| SEMA3E   | chr7  | 83098591/T//A    | nonsynonymous | 0 | 1 |
| MUC12    | chr7  | 100646776/A//G   | nonsynonymous | 0 | 1 |

|                |       |                  |               |   |   |
|----------------|-------|------------------|---------------|---|---|
| CSMD3          | chr8  | 113246655/T//A   | nonsynonymous | 0 | 1 |
| MSANTD3-TMEFF1 | chr9  | 103204573/A//T   | nonsynonymous | 0 | 1 |
| OR5D14         | chr11 | 55563035/A//G    | nonsynonymous | 0 | 1 |
| ATM            | chr11 | 108196179/A//G   | nonsynonymous | 0 | 1 |
| ACRBP          | chr12 | 6756044/A//G     | nonsynonymous | 0 | 1 |
| TFDP1          | chr13 | 114285954/A//C   | nonsynonymous | 0 | 1 |
| LTB4R2         | chr14 | 24780718/T//C    | nonsynonymous | 0 | 1 |
| GRN            | chr17 | 42428098/C//T    | nonsynonymous | 0 | 1 |
| FSD1           | chr19 | 4323377/C//G     | nonsynonymous | 0 | 1 |
| ZNF701         | chr19 | 53086598/G//A    | nonsynonymous | 0 | 1 |
| KIZ            | chr20 | 21186184/G//A    | synonymous    | 0 | 1 |
| PISD           | chr22 | 32017064/A//G    | synonymous    | 0 | 1 |
| MYH9           | chr22 | 36691680/T//C    | nonsynonymous | 0 | 1 |
| CDR1           | chrX  | 139865913/T//C   | nonsynonymous | 0 | 1 |
| MASP2          | chr1  | 11097837/A//C    | synonymous    | 1 | 0 |
| ARHGEF2        | chr1  | 155934781/T//G   | nonsynonymous | 1 | 0 |
| ZNF512         | chr2  | 27838099/A//G    | nonsynonymous | 1 | 0 |
| SLC4A5         | chr2  | 74491425/A//G    | synonymous    | 1 | 0 |
| SLC9A2         | chr2  | 103299860/C//A   | nonsynonymous | 1 | 0 |
| TTN            | chr2  | 179585815/C//T   | nonsynonymous | 1 | 0 |
| RNF168         | chr3  | 196214338/T//C   | nonsynonymous | 1 | 0 |
| PTCD2          | chr5  | 71654050/A//C    | nonsynonymous | 1 | 0 |
| OPN1SW         | chr7  | 128413815/A//T   | nonsynonymous | 1 | 0 |
| CSMD3          | chr8  | 113988171/C//T   | nonsynonymous | 1 | 0 |
| SCN3B          | chr11 | 123508952/C//T   | nonsynonymous | 1 | 0 |
| ABCC9          | chr12 | 22001134/C//T    | nonsynonymous | 1 | 0 |
| DDX23          | chr12 | 49226219/T//G    | synonymous    | 1 | 0 |
| MYH7           | chr14 | 23890230/G//A    | synonymous    | 1 | 0 |
| RHCG           | chr15 | 90030220/C//T    | synonymous    | 1 | 0 |
| CACNA1H        | chr16 | 1262079/C//T     | nonsynonymous | 1 | 0 |
| INO80E         | chr16 | 30016789/C//G    | synonymous    | 1 | 0 |
| ZNF267         | chr16 | 31926731/A//G    | synonymous    | 1 | 0 |
| ZFP1           | chr16 | 75203489/A//G    | nonsynonymous | 1 | 0 |
| MYO5B          | chr18 | 47421492/T//C    | nonsynonymous | 1 | 0 |
| PDCD5          | chr19 | 33076764/T//C    | nonsynonymous | 1 | 0 |
| TNNI3          | chr19 | 55666153/C//T    | nonsynonymous | 1 | 0 |
| PTPRT          | chr20 | 40735466/C//T    | nonsynonymous | 1 | 0 |
| CSE1L          | chr20 | 47688880/G//A    | nonsynonymous | 1 | 0 |
| KRTAP19-1      | chr21 | 31852534/G//A    | nonsynonymous | 1 | 0 |
| OSM            | chr22 | 30659978/C//T    | nonsynonymous | 1 | 0 |
| ARHGEF16       | chr1  | 3395124/C//T     | nonsynonymous | 0 | 1 |
| IL22RA1        | chr1  | 24449813/C//A    | synonymous    | 0 | 1 |
| PABPC4         | chr1  | 40030855/T//A    | nonsynonymous | 0 | 1 |
| NRAS           | chr1  | 115256536/C//A   | nonsynonymous | 0 | 1 |
| SNTG2          | chr2  | 1093900/C//T     | nonsynonymous | 0 | 1 |
| COL4A4         | chr2  | 227966244/C//G   | synonymous    | 0 | 1 |
| ING5           | chr2  | 242650831/C//T   | nonsynonymous | 0 | 1 |
| CMTM6          | chr3  | 32544121/G//A    | synonymous    | 0 | 1 |
| DNAH1          | chr3  | 52430484/G//A    | nonsynonymous | 0 | 1 |
| PRKCD          | chr3  | 53223190/C//T    | synonymous    | 0 | 1 |
| LRRC15         | chr3  | 194081584/C//T   | synonymous    | 0 | 1 |
| SMN1           | chr5  | 70247825/A//T    | synonymous    | 0 | 1 |
| GRIA1          | chr5  | 153078481/C//T   | nonsynonymous | 0 | 1 |
| HCG4           | chr6  | 29760024/G//A    | synonymous    | 0 | 1 |
| MAP3K4         | chr6  | 161470762/G//A   | synonymous    | 0 | 1 |
| CSMD1          | chr8  | 3565996/A//C     | nonsynonymous | 0 | 1 |
| EBAG9          | chr8  | 110576735/G//A   | nonsynonymous | 0 | 1 |
| COL17A1        | chr10 | 105801241/A//ACC | nonsynonymous | 0 | 1 |
| TMEM223        | chr11 | 62558071/G//A    | synonymous    | 0 | 1 |
| SPDYC          | chr11 | 64940375/G//A    | nonsynonymous | 0 | 1 |
| OR10S1         | chr11 | 123847434/C//T   | nonsynonymous | 0 | 1 |
| SLC6A12        | chr12 | 301696/A//G      | nonsynonymous | 0 | 1 |
| TNS2           | chr12 | 53457027/G//A    | synonymous    | 0 | 1 |
| USP44          | chr12 | 95918558/C//T    | nonsynonymous | 0 | 1 |
| SPIRE2         | chr16 | 89916915/C//T    | synonymous    | 0 | 1 |
| LIG3           | chr17 | 33313007/A//T    | nonsynonymous | 0 | 1 |
| IL12RB1        | chr19 | 18179253/C//T    | nonsynonymous | 0 | 1 |
| ZNF229         | chr19 | 44934441/T//A    | nonsynonymous | 0 | 1 |
| ZNF541         | chr19 | 48047998/C//T    | synonymous    | 0 | 1 |
| MACROD2        | chr20 | 14665491/G//A    | nonsynonymous | 0 | 1 |

|           |       |                  |               |   |   |
|-----------|-------|------------------|---------------|---|---|
| DNMT3B    | chr20 | 31388105/G//A    | nonsynonymous | 0 | 1 |
| BPI       | chr20 | 36948654/A//C    | nonsynonymous | 0 | 1 |
| NPEPL1    | chr20 | 57268837/C//G    | nonsynonymous | 0 | 1 |
| DSCAM     | chr21 | 41550943/G//T    | nonsynonymous | 0 | 1 |
| IL9R      | chrX  | 155239561/C//T   | synonymous    | 0 | 1 |
| TXLNA     | chr1  | 32646844/G//T    | synonymous    | 0 | 1 |
| MACF1     | chr1  | 39854065/G//A    | nonsynonymous | 0 | 1 |
| KANK4     | chr1  | 62737149/C//A    | nonsynonymous | 0 | 1 |
| PDE4B     | chr1  | 66723370/T//C    | synonymous    | 0 | 1 |
| USP21     | chr1  | 161132788/C//T   | nonsynonymous | 0 | 1 |
| ADAMTS4   | chr1  | 161166415/G//A   | nonsynonymous | 0 | 1 |
| ASTN1     | chr1  | 177030209/C//G   | synonymous    | 0 | 1 |
| HMCN1     | chr1  | 185892536/G//A   | nonsynonymous | 0 | 1 |
| CDC42BPA  | chr1  | 227300109/T//G   | synonymous    | 0 | 1 |
| TBCE      | chr1  | 235564884/C//G   | nonsynonymous | 0 | 1 |
| VN1R5     | chr1  | 247419516/T//G   | nonsynonymous | 0 | 1 |
| EGR4      | chr2  | 73519111/G//A    | nonsynonymous | 0 | 1 |
| SULT1C3   | chr2  | 108881786/A//C   | synonymous    | 0 | 1 |
| AMER3     | chr2  | 131520837/G//T   | nonsynonymous | 0 | 1 |
| KYNU      | chr2  | 143718250/T//C   | nonsynonymous | 0 | 1 |
| IFIH1     | chr2  | 163163335/G//T   | nonsynonymous | 0 | 1 |
| SCN3A     | chr2  | 165947430/A//G   | nonsynonymous | 0 | 1 |
| LRP2      | chr2  | 170096286/C//G   | nonsynonymous | 0 | 1 |
| DFNB59    | chr2  | 179325821/C//A   | synonymous    | 0 | 1 |
| TTN       | chr2  | 179401235/C//T   | nonsynonymous | 0 | 1 |
| FSIP2     | chr2  | 186669529/T//C   | nonsynonymous | 0 | 1 |
| MAP2      | chr2  | 210560347/G//C   | nonsynonymous | 0 | 1 |
| CFAP65    | chr2  | 219893099/C//A   | nonsynonymous | 0 | 1 |
| PSMD1     | chr2  | 231951864/G//A   | nonsynonymous | 0 | 1 |
| SAG       | chr2  | 234229442/G//T   | synonymous    | 0 | 1 |
| GRM7      | chr3  | 7721735/G//C     | nonsynonymous | 0 | 1 |
| RPUSD3    | chr3  | 9881892/G//A     | synonymous    | 0 | 1 |
| FANCD2    | chr3  | 10091136/G//C    | nonsynonymous | 0 | 1 |
| CYP8B1    | chr3  | 42916094/G//A    | synonymous    | 0 | 1 |
| CCRL2     | chr3  | 46449963/G//A    | synonymous    | 0 | 1 |
| HYAL2     | chr3  | 50355786/C//G    | nonsynonymous | 0 | 1 |
| DCAF1     | chr3  | 51456298/T//C    | nonsynonymous | 0 | 1 |
| CADPS     | chr3  | 62543153/C//T    | synonymous    | 0 | 1 |
| CNTN3     | chr3  | 74347275/A//C    | nonsynonymous | 0 | 1 |
| CLDND1    | chr3  | 98241576/G//A    | synonymous    | 0 | 1 |
| GTPBP8    | chr3  | 112714031/T//C   | nonsynonymous | 0 | 1 |
| SPSB4     | chr3  | 140785261/G//A   | synonymous    | 0 | 1 |
| ZIC1      | chr3  | 147131143/C//T   | synonymous    | 0 | 1 |
| TTC14     | chr3  | 180326584/A//T   | nonsynonymous | 0 | 1 |
| GMNC      | chr3  | 190573066/G//C   | synonymous    | 0 | 1 |
|           | chr4  | 17847444/A//G    | synonymous    | 0 | 1 |
| PPARGC1A  | chr4  | 23833296/C//T    | nonsynonymous | 0 | 1 |
| DHX15     | chr4  | 24550576/T//C    | nonsynonymous | 0 | 1 |
| TECRL     | chr4  | 65194270/T//A    | synonymous    | 0 | 1 |
| TMPRSS11D | chr4  | 68699001/G//A    | nonsynonymous | 0 | 1 |
| NEUROG2   | chr4  | 113435919/A//C   | nonsynonymous | 0 | 1 |
| WDR17     | chr4  | 177056272/C//T   | nonsynonymous | 0 | 1 |
| TENM3     | chr4  | 183594221/G//A   | nonsynonymous | 0 | 1 |
| TENM3     | chr4  | 183675793/A//C   | nonsynonymous | 0 | 1 |
| ZBED3     | chr5  | 76373616/C//A    | nonsynonymous | 0 | 1 |
| AP3B1     | chr5  | 77473201/T//C    | nonsynonymous | 0 | 1 |
| ST8SIA4   | chr5  | 100191911/T//A   | nonsynonymous | 0 | 1 |
| FTMT      | chr5  | 121188029/A//C   | nonsynonymous | 0 | 1 |
| PCDHB2    | chr5  | 140475758/G//A   | nonsynonymous | 0 | 1 |
| PCDHB10   | chr5  | 140573503/G//A   | nonsynonymous | 0 | 1 |
| PCDHB11   | chr5  | 140580943/C//T   | synonymous    | 0 | 1 |
| PCDHGB6   | chr5  | 140789997/A//G   | nonsynonymous | 0 | 1 |
| ABLM3     | chr5  | 148590370/CAG//C | nonsynonymous | 0 | 1 |
| GABRG2    | chr5  | 161524717/T//C   | nonsynonymous | 0 | 1 |
| CNOT6     | chr5  | 179996248/A//T   | nonsynonymous | 0 | 1 |
| PIM1      | chr6  | 37138951/C//G    | nonsynonymous | 0 | 1 |
| RPL7L1    | chr6  | 42852469/G//A    | nonsynonymous | 0 | 1 |
| REV3L     | chr6  | 111696422/G//C   | nonsynonymous | 0 | 1 |
| TRDN      | chr6  | 123653045/G//A   | nonsynonymous | 0 | 1 |
| T         | chr6  | 166580201/G//A   | nonsynonymous | 0 | 1 |

|           |       |                     |               |   |   |
|-----------|-------|---------------------|---------------|---|---|
| INTS1     | chr7  | 1529315/G//A        | synonymous    | 0 | 1 |
| CARD11    | chr7  | 2946427/G//A        | nonsynonymous | 0 | 1 |
| ABCA13    | chr7  | 48335319/C//T       | nonsynonymous | 0 | 1 |
| ABCA13    | chr7  | 48467363/G//T       | nonsynonymous | 0 | 1 |
| C7orf72   | chr7  | 50198761/A//G       | nonsynonymous | 0 | 1 |
| PEG10     | chr7  | 94293280/G//C       | nonsynonymous | 0 | 1 |
| ZNF394    | chr7  | 99092032/T//C       | nonsynonymous | 0 | 1 |
| LHFPL3    | chr7  | 103969677/G//C      | synonymous    | 0 | 1 |
| TMEM168   | chr7  | 112423979/A//T      | nonsynonymous | 0 | 1 |
| DGKI      | chr7  | 137304637/C//A      | nonsynonymous | 0 | 1 |
| RAB19     | chr7  | 140125855/C//A      | nonsynonymous | 0 | 1 |
| TUSC3     | chr8  | 15531294/C//T       | synonymous    | 0 | 1 |
| PENK      | chr8  | 57354130/G//A       | nonsynonymous | 0 | 1 |
| PREX2     | chr8  | 69058465/CAGAAGG//C | nonsynonymous | 0 | 1 |
| OPLAH     | chr8  | 145113215/G//A      | synonymous    | 0 | 1 |
| NDUFB6    | chr9  | 32573058/T//A       | synonymous    | 0 | 1 |
| OSTF1     | chr9  | 77761688/T//G       | synonymous    | 0 | 1 |
| SVEP1     | chr9  | 113233669/G//C      | synonymous    | 0 | 1 |
| ZBTB34    | chr9  | 129643020/A//T      | nonsynonymous | 0 | 1 |
| CACNA1B   | chr9  | 141016473/G//A      | synonymous    | 0 | 1 |
| DIP2C     | chr10 | 403880/A//G         | synonymous    | 0 | 1 |
| KIAA1217  | chr10 | 24832907/A//C       | nonsynonymous | 0 | 1 |
| WDFY4     | chr10 | 50011396/A//G       | synonymous    | 0 | 1 |
| USP54     | chr10 | 75276561/A//T       | nonsynonymous | 0 | 1 |
| GRID1     | chr10 | 87487760/C//T       | nonsynonymous | 0 | 1 |
| CFAP58    | chr10 | 106152039/G//C      | nonsynonymous | 0 | 1 |
| HPX       | chr11 | 6461742/C//G        | nonsynonymous | 0 | 1 |
| MRGPRX4   | chr11 | 18194816/G//A       | nonsynonymous | 0 | 1 |
| OR4X1     | chr11 | 48285454/A//G       | synonymous    | 0 | 1 |
| OR5AK2    | chr11 | 56757097/T//C       | nonsynonymous | 0 | 1 |
| B3GAT3    | chr11 | 62384575/G//C       | nonsynonymous | 0 | 1 |
| PRR4      | chr12 | 10999672/G//A       | nonsynonymous | 0 | 1 |
| KRT83     | chr12 | 52711549/G//A       | synonymous    | 0 | 1 |
| ZNF385A   | chr12 | 54764212/C//A       | nonsynonymous | 0 | 1 |
| INHBE     | chr12 | 57850213/C//A       | nonsynonymous | 0 | 1 |
| OTOGL     | chr12 | 80750213/T//G       | nonsynonymous | 0 | 1 |
| RPH3A     | chr12 | 113304599/G//A      | nonsynonymous | 0 | 1 |
| VSIG10    | chr12 | 118517273/C//T      | nonsynonymous | 0 | 1 |
| TMEM132B  | chr12 | 126139163/C//T      | synonymous    | 0 | 1 |
| C1QTNF9B  | chr13 | 24471039/T//G       | synonymous    | 0 | 1 |
| C1QTNF9B  | chr13 | 24471048/C//T       | synonymous    | 0 | 1 |
| KL        | chr13 | 33590997/G//A       | nonsynonymous | 0 | 1 |
| ZFHX2     | chr14 | 24001800/G//A       | synonymous    | 0 | 1 |
| C14orf105 | chr14 | 57938004/A//T       | synonymous    | 0 | 1 |
| ARID4A    | chr14 | 58817854/G//T       | nonsynonymous | 0 | 1 |
| SYNE2     | chr14 | 64600834/G//C       | synonymous    | 0 | 1 |
| GALNT16   | chr14 | 69806254/C//T       | nonsynonymous | 0 | 1 |
| LTBP2     | chr14 | 75078222/G//A       | synonymous    | 0 | 1 |
| TTC7B     | chr14 | 91252523/G//A       | nonsynonymous | 0 | 1 |
| TDRD9     | chr14 | 104497583/G//A      | nonsynonymous | 0 | 1 |
| CHRNA7    | chr15 | 32460346/C//T       | nonsynonymous | 0 | 1 |
| AP3B2     | chr15 | 83346442/C//A       | nonsynonymous | 0 | 1 |
| SLC6A2    | chr16 | 55703581/G//A       | nonsynonymous | 0 | 1 |
| CDH16     | chr16 | 66943266/C//T       | nonsynonymous | 0 | 1 |
| ENKD1     | chr16 | 67698913/T//C       | nonsynonymous | 0 | 1 |
| PSKH1     | chr16 | 67961297/C//T       | nonsynonymous | 0 | 1 |
| COTL1     | chr16 | 84600401/G//A       | synonymous    | 0 | 1 |
| ZC3H18    | chr16 | 88643557/G//A       | nonsynonymous | 0 | 1 |
| NF1       | chr17 | 29657373/G//T       | nonsynonymous | 0 | 1 |
| ASIC2     | chr17 | 32483099/G//C       | nonsynonymous | 0 | 1 |
| ERN1      | chr17 | 62131627/C//T       | nonsynonymous | 0 | 1 |
| SGSH      | chr17 | 78194122/G//A       | synonymous    | 0 | 1 |
| MIR6786   | chr17 | 79660885/C//G       | synonymous    | 0 | 1 |
| THOC1     | chr18 | 267989/G//C         | nonsynonymous | 0 | 1 |
| ELOA2     | chr18 | 44561248/G//A       | nonsynonymous | 0 | 1 |
| DOHH      | chr19 | 3491666/C//T        | nonsynonymous | 0 | 1 |
| FBN3      | chr19 | 8153043/C//T        | nonsynonymous | 0 | 1 |
| RAB11B    | chr19 | 8467001/G//T        | nonsynonymous | 0 | 1 |
| ADAMTS10  | chr19 | 8650187/G//T        | synonymous    | 0 | 1 |
| OR2Z1     | chr19 | 8842127/C//T        | nonsynonymous | 0 | 1 |

|           |       |                 |               |   |   |
|-----------|-------|-----------------|---------------|---|---|
| MAN2B1    | chr19 | 12768335/G//A   | synonymous    | 0 | 1 |
| EPHX3     | chr19 | 15342838/G//A   | nonsynonymous | 0 | 1 |
| ABHD8     | chr19 | 17412293/G//A   | nonsynonymous | 0 | 1 |
| ZNF527    | chr19 | 37870107/G//C   | nonsynonymous | 0 | 1 |
| RYR1      | chr19 | 39019018/G//A   | nonsynonymous | 0 | 1 |
| SPTBN4    | chr19 | 41040025/G//A   | synonymous    | 0 | 1 |
| PAFAH1B3  | chr19 | 42806422/C//A   | nonsynonymous | 0 | 1 |
| APOC1     | chr19 | 45419444/C//G   | synonymous    | 0 | 1 |
| ACPT      | chr19 | 51298030/CCT//C | synonymous    | 0 | 1 |
| NLRP7     | chr19 | 55451569/G//A   | synonymous    | 0 | 1 |
| CPXM1     | chr20 | 2779403/C//T    | synonymous    | 0 | 1 |
| VSX1      | chr20 | 25062706/G//A   | synonymous    | 0 | 1 |
| DNMT3B    | chr20 | 31375235/A//T   | nonsynonymous | 0 | 1 |
| ARHGAP40  | chr20 | 37255767/G//A   | nonsynonymous | 0 | 1 |
| ACTR5     | chr20 | 37378710/C//T   | nonsynonymous | 0 | 1 |
| CDH4      | chr20 | 60511855/G//A   | nonsynonymous | 0 | 1 |
| CHRNA4    | chr20 | 61981703/G//A   | nonsynonymous | 0 | 1 |
| TPTE      | chr21 | 10907047/A//C   | synonymous    | 0 | 1 |
| KRTAP13-2 | chr21 | 31743924/GT//G  | synonymous    | 0 | 1 |
| PAXBP1    | chr21 | 34117939/C//A   | nonsynonymous | 0 | 1 |
| RRP1B     | chr21 | 45107674/A//G   | synonymous    | 0 | 1 |
| ITGB2     | chr21 | 46310083/G//A   | synonymous    | 0 | 1 |
| CSF2RA    | chrX  | 1413358/G//A    | synonymous    | 0 | 1 |
| AMER1     | chrX  | 63411405/C//T   | nonsynonymous | 0 | 1 |
| AMER1     | chrX  | 63412323/C//A   | nonsynonymous | 0 | 1 |
| ATRX      | chrX  | 76907606/C//T   | nonsynonymous | 0 | 1 |
| BRWD3     | chrX  | 79964973/G//T   | nonsynonymous | 0 | 1 |
| RGAG1     | chrX  | 109694799/A//C  | nonsynonymous | 0 | 1 |
| SAGE1     | chrX  | 134992624/C//G  | nonsynonymous | 0 | 1 |
| CRTC2     | chr1  | 153924670/G//C  | nonsynonymous | 0 | 1 |
| FMO1      | chr1  | 171252304/C//A  | nonsynonymous | 0 | 1 |
| ADSS      | chr1  | 244615009/C//T  | synonymous    | 0 | 1 |
| DNAH6     | chr2  | 84932760/G//C   | nonsynonymous | 0 | 1 |
| EDAR      | chr2  | 109545718/G//A  | nonsynonymous | 0 | 1 |
| ARHGEF4   | chr2  | 131688536/C//CT | nonsynonymous | 0 | 1 |
| AAMP      | chr2  | 219134255/C//T  | nonsynonymous | 0 | 1 |
| LRRC2     | chr3  | 46586591/T//C   | nonsynonymous | 0 | 1 |
| NUDT16    | chr3  | 131100696/G//T  | synonymous    | 0 | 1 |
| UVSSA     | chr4  | 1347046/C//T    | nonsynonymous | 0 | 1 |
| ADRA2C    | chr4  | 3769626/G//T    | synonymous    | 0 | 1 |
| BOD1L1    | chr4  | 13600640/T//A   | synonymous    | 0 | 1 |
| SLIT2     | chr4  | 20598253/G//T   | nonsynonymous | 0 | 1 |
| TBC1D19   | chr4  | 26675410/A//G   | nonsynonymous | 0 | 1 |
| KIAA1211  | chr4  | 57182581/C//T   | synonymous    | 0 | 1 |
| EPHA5     | chr4  | 66217156/C//A   | nonsynonymous | 0 | 1 |
| UGT2B11   | chr4  | 70074069/C//T   | synonymous    | 0 | 1 |
| SLC4A4    | chr4  | 72222724/G//C   | nonsynonymous | 0 | 1 |
| UGT8      | chr4  | 115589437/A//G  | synonymous    | 0 | 1 |
| FAT4      | chr4  | 126372614/G//A  | synonymous    | 0 | 1 |
| GUCY1B3   | chr4  | 156696211/A//G  | nonsynonymous | 0 | 1 |
| ETFDH     | chr4  | 159606275/C//G  | synonymous    | 0 | 1 |
| HAND2     | chr4  | 174450394/T//C  | nonsynonymous | 0 | 1 |
| WDR17     | chr4  | 177094438/T//A  | nonsynonymous | 0 | 1 |
| TRIML2    | chr4  | 189022294/A//T  | synonymous    | 0 | 1 |
| TLX3      | chr5  | 170737189/C//T  | nonsynonymous | 0 | 1 |
| GJA10     | chr6  | 90604298/T//A   | synonymous    | 0 | 1 |
| BACH2     | chr6  | 90661498/G//T   | synonymous    | 0 | 1 |
| VGLL2     | chr6  | 117593671/G//T  | synonymous    | 0 | 1 |
| ROS1      | chr6  | 117662756/G//C  | nonsynonymous | 0 | 1 |
| FAM184A   | chr6  | 119345815/A//G  | nonsynonymous | 0 | 1 |
| ACTB      | chr7  | 5567757/C//T    | nonsynonymous | 0 | 1 |
| C7orf49   | chr7  | 134851484/A//G  | nonsynonymous | 0 | 1 |
| PIWIL2    | chr8  | 22146176/G//A   | nonsynonymous | 0 | 1 |
| CCNE2     | chr8  | 95893875/T//C   | synonymous    | 0 | 1 |
| FAM208B   | chr10 | 5784296/C//G    | nonsynonymous | 0 | 1 |
| ITGA8     | chr10 | 15686213/G//T   | synonymous    | 0 | 1 |
| SORCS3    | chr10 | 107015561/T//C  | nonsynonymous | 0 | 1 |
| PPP1R14B  | chr11 | 64012671/C//T   | synonymous    | 0 | 1 |
| HEPHL1    | chr11 | 93808527/C//T   | synonymous    | 0 | 1 |
| PAN2      | chr12 | 56720595/G//A   | synonymous    | 0 | 1 |

|             |       |                          |               |   |   |
|-------------|-------|--------------------------|---------------|---|---|
| LTA4H       | chr12 | 96429220/G//C            | nonsynonymous | 0 | 1 |
| OR4Q3       | chr14 | 20216160/G//T            | nonsynonymous | 0 | 1 |
| ZFHx2       | chr14 | 23993108/T//C            | nonsynonymous | 0 | 1 |
| HECTD1      | chr14 | 31626181/G//A            | synonymous    | 0 | 1 |
| AKAP6       | chr14 | 32902960/A//T            | synonymous    | 0 | 1 |
| AKAP6       | chr14 | 33291740/G//T            | nonsynonymous | 0 | 1 |
| TDP1        | chr14 | 90499490/G//T            | nonsynonymous | 0 | 1 |
|             | chr14 | 94430817/G//T            | synonymous    | 0 | 1 |
| DICER1      | chr14 | 95569869/C//A            | nonsynonymous | 0 | 1 |
| BDKRB1      | chr14 | 96730781/G//T            | synonymous    | 0 | 1 |
| YY1         | chr14 | 100705985/T//A           | nonsynonymous | 0 | 1 |
| KIF26A      | chr14 | 104643225/G//T           | nonsynonymous | 0 | 1 |
| LOC727924   | chr15 | 22369055/G//T            | synonymous    | 0 | 1 |
| APBA2       | chr15 | 29347016/G//T            | nonsynonymous | 0 | 1 |
| FAN1        | chr15 | 31197051/A//T            | nonsynonymous | 0 | 1 |
| PLCB2       | chr15 | 40584601/G//A            | synonymous    | 0 | 1 |
| FAM63B      | chr15 | 59064243/C//T            | synonymous    | 0 | 1 |
| AGBL1       | chr15 | 87572156/T//A            | synonymous    | 0 | 1 |
| BCAR1       | chr16 | 75276497/G//A            | synonymous    | 0 | 1 |
| ATAD5       | chr17 | 29182286/T//C            | nonsynonymous | 0 | 1 |
| FFAR1       | chr19 | 35842664/G//A            | synonymous    | 0 | 1 |
| SHKBP1      | chr19 | 41096684/A//G            | nonsynonymous | 0 | 1 |
| ZNF541      | chr19 | 48049123/G//A            | synonymous    | 0 | 1 |
| KIR3DL1     | chr19 | 55341643/G//A            | synonymous    | 0 | 1 |
| KRTAP10-10  | chr21 | 46058107/C//A            | synonymous    | 0 | 1 |
| LZTR1       | chr22 | 21348869/C//T            | synonymous    | 0 | 1 |
| LZTR1       | chr22 | 21349173/C//T            | synonymous    | 0 | 1 |
| LZTR1       | chr22 | 21350048/C//T            | synonymous    | 0 | 1 |
| ITIH6       | chrX  | 54777533/T//C            | synonymous    | 0 | 1 |
| ERCC3       | chr2  | 128044339/C//T           | nonsynonymous | 0 | 1 |
| NEB         | chr2  | 152397217/G//T           | synonymous    | 0 | 1 |
| ZNF732      | chr4  | 265482/T//C              | synonymous    | 0 | 1 |
| ARL15       | chr5  | 53467715/G//T            | nonsynonymous | 0 | 1 |
| TNXB        | chr6  | 32035620/C//T            | nonsynonymous | 0 | 1 |
| MDN1        | chr6  | 90383955/C//T            | nonsynonymous | 0 | 1 |
| EHMT1       | chr9  | 140706014/C//T           | synonymous    | 0 | 1 |
| MUC5B       | chr11 | 1272548/T//C             | nonsynonymous | 0 | 1 |
| KIF5A       | chr12 | 57962815/C//A            | nonsynonymous | 0 | 1 |
| MDGA2       | chr14 | 47426801/T//G            | nonsynonymous | 0 | 1 |
| RABEP1      | chr17 | 5235383/A//G             | synonymous    | 0 | 1 |
| SOX9        | chr17 | 70119928/C//CG           | nonsynonymous | 0 | 1 |
| ZNF57       | chr19 | 2901036/G//T             | synonymous    | 0 | 1 |
| TDRD12      | chr19 | 33263733/A//C            | nonsynonymous | 0 | 1 |
| PAK5        | chr20 | 9561313/C//T             | nonsynonymous | 0 | 1 |
| KCNS1       | chr20 | 43726359/C//T            | nonsynonymous | 0 | 1 |
| ZCCHC18     | chrX  | 103358711/C//T           | synonymous    | 0 | 1 |
| DLGAP3      | chr1  | 35332794/T//G            | nonsynonymous | 0 | 1 |
| FPGT-TNNI3K | chr1  | 74957901/G//A            | nonsynonymous | 0 | 1 |
| GF11        | chr1  | 92948553/A//G            | nonsynonymous | 0 | 1 |
| OR10X1      | chr1  | 158548766/C//A           | nonsynonymous | 0 | 1 |
| SPTA1       | chr1  | 158632690/T//A           | nonsynonymous | 0 | 1 |
| OR10J1      | chr1  | 159409945/C//T           | nonsynonymous | 0 | 1 |
| HSPA6       | chr1  | 161496264/C//T           | nonsynonymous | 0 | 1 |
| ATP6V1G3    | chr1  | 198492396/T//A           | synonymous    | 0 | 1 |
| CYB5R1      | chr1  | 202932244/C//T           | nonsynonymous | 0 | 1 |
| PTPN14      | chr1  | 214557025/G//A           | nonsynonymous | 0 | 1 |
| DISC1       | chr1  | 231830153/C//G           | nonsynonymous | 0 | 1 |
| CHRM3       | chr1  | 240071698/C//A           | nonsynonymous | 0 | 1 |
| PEX13       | chr2  | 61275825/GAATCTGTTTTGTTG | nonsynonymous | 0 | 1 |
| SH3RF3      | chr2  | 110015057/C//T           | synonymous    | 0 | 1 |
| RAB3GAP1    | chr2  | 135872936/C//G           | nonsynonymous | 0 | 1 |
| ABCA12      | chr2  | 215797303/T//C           | synonymous    | 0 | 1 |
| TNS1        | chr2  | 218683158/G//A           | synonymous    | 0 | 1 |
| OBSL1       | chr2  | 220435552/G//T           | synonymous    | 0 | 1 |
| NGEF        | chr2  | 233748731/G//C           | nonsynonymous | 0 | 1 |
| EPHA3       | chr3  | 89259150/G//T            | nonsynonymous | 0 | 1 |
| FILIP1L     | chr3  | 99569771/G//A            | nonsynonymous | 0 | 1 |
| IMPG2       | chr3  | 100994581/G//C           | nonsynonymous | 0 | 1 |
| EREG        | chr4  | 75231097/G//A            | synonymous    | 0 | 1 |
| NAAA        | chr4  | 76836059/A//C            | nonsynonymous | 0 | 1 |

|           |       |                   |               |   |   |
|-----------|-------|-------------------|---------------|---|---|
| HERC5     | chr4  | 89390310/T//A     | nonsynonymous | 0 | 1 |
| TRAM1L1   | chr4  | 118006515/G//T    | nonsynonymous | 0 | 1 |
| USP53     | chr4  | 120161062/A//C    | synonymous    | 0 | 1 |
| CDH9      | chr5  | 26906093/G//A     | synonymous    | 0 | 1 |
| MRPS30    | chr5  | 44815317/G//C     | synonymous    | 0 | 1 |
| APC       | chr5  | 112173704/C//T    | nonsynonymous | 0 | 1 |
| SLC12A2   | chr5  | 127420206/CCGG//C | nonsynonymous | 0 | 1 |
| CSF2      | chr5  | 131409503/A//C    | synonymous    | 0 | 1 |
| ANKHD1    | chr5  | 139781756/G//A    | synonymous    | 0 | 1 |
| PCDHA7    | chr5  | 140215714/G//A    | synonymous    | 0 | 1 |
| PCDHA11   | chr5  | 140250356/C//T    | synonymous    | 0 | 1 |
| PCDHB2    | chr5  | 140476595/G//A    | nonsynonymous | 0 | 1 |
| DOCK2     | chr5  | 169412924/C//G    | nonsynonymous | 0 | 1 |
| DBN1      | chr5  | 176894033/G//A    | nonsynonymous | 0 | 1 |
| HIST1H2BG | chr6  | 26216831/C//T     | nonsynonymous | 0 | 1 |
| DNAH8     | chr6  | 38819406/C//T     | nonsynonymous | 0 | 1 |
| CRIP3     | chr6  | 43274012/G//T     | nonsynonymous | 0 | 1 |
| COL21A1   | chr6  | 56032966/G//T     | nonsynonymous | 0 | 1 |
| RNGTT     | chr6  | 89554232/G//A     | synonymous    | 0 | 1 |
| METTL24   | chr6  | 110620290/A//G    | synonymous    | 0 | 1 |
| RAET1L    | chr6  | 150342092/G//C    | nonsynonymous | 0 | 1 |
| ERMARD    | chr6  | 170175446/C//T    | synonymous    | 0 | 1 |
| FERD3L    | chr7  | 19184566/G//A     | synonymous    | 0 | 1 |
| CCDC129   | chr7  | 31614266/G//A     | nonsynonymous | 0 | 1 |
| IKZF1     | chr7  | 50358674/G//A     | nonsynonymous | 0 | 1 |
| POM121L12 | chr7  | 53103944/G//A     | nonsynonymous | 0 | 1 |
| RUNDC3B   | chr7  | 87370873/C//A     | nonsynonymous | 0 | 1 |
| ZNF804B   | chr7  | 88964521/T//A     | nonsynonymous | 0 | 1 |
| KRBA1     | chr7  | 149430772/G//A    | nonsynonymous | 0 | 1 |
| CRYGN     | chr7  | 151127133/C//A    | synonymous    | 0 | 1 |
| SNTG1     | chr8  | 51621474/G//T     | nonsynonymous | 0 | 1 |
| RIMS2     | chr8  | 104898124/C//T    | nonsynonymous | 0 | 1 |
| SAMD12    | chr8  | 119391749/C//G    | nonsynonymous | 0 | 1 |
| TRMT12    | chr8  | 125463346/C//G    | nonsynonymous | 0 | 1 |
| ELAVL2    | chr9  | 23701434/T//C     | nonsynonymous | 0 | 1 |
| CKS2      | chr9  | 91930143/G//A     | nonsynonymous | 0 | 1 |
|           | chr9  | 96846925/G//A     | synonymous    | 0 | 1 |
| ANKS6     | chr9  | 101552690/C//T    | synonymous    | 0 | 1 |
| KIAA0368  | chr9  | 114180257/C//T    | nonsynonymous | 0 | 1 |
| NOTCH1    | chr9  | 139399152/C//G    | nonsynonymous | 0 | 1 |
| ANKRD30A  | chr10 | 37421172/G//T     | nonsynonymous | 0 | 1 |
| TET1      | chr10 | 70451227/G//A     | nonsynonymous | 0 | 1 |
| KIF20B    | chr10 | 91514322/A//G     | synonymous    | 0 | 1 |
| R3HCC1L   | chr10 | 99995191/C//T     | nonsynonymous | 0 | 1 |
| EMX2      | chr10 | 119302967/C//G    | synonymous    | 0 | 1 |
| SLC5A12   | chr11 | 26692651/A//G     | nonsynonymous | 0 | 1 |
| BDNF      | chr11 | 27679922/C//T     | nonsynonymous | 0 | 1 |
| WT1       | chr11 | 32456807/C//G     | nonsynonymous | 0 | 1 |
| HIPK3     | chr11 | 33373166/A//G     | synonymous    | 0 | 1 |
| LRRC4C    | chr11 | 40136829/C//T     | synonymous    | 0 | 1 |
| ACCS      | chr11 | 44089364/C//T     | synonymous    | 0 | 1 |
| CD6       | chr11 | 60785783/C//A     | nonsynonymous | 0 | 1 |
| SLC22A11  | chr11 | 64331795/C//T     | synonymous    | 0 | 1 |
| CTTN      | chr11 | 70265950/G//A     | nonsynonymous | 0 | 1 |
| GRM5      | chr11 | 88780843/A//G     | synonymous    | 0 | 1 |
| FAT3      | chr11 | 92533820/C//G     | nonsynonymous | 0 | 1 |
| DYNC2H1   | chr11 | 103158334/G//T    | nonsynonymous | 0 | 1 |
|           | chr11 | 113101946/G//T    | synonymous    | 0 | 1 |
| C11orf63  | chr11 | 122756647/G//C    | nonsynonymous | 0 | 1 |
| NRGN      | chr11 | 124615541/G//A    | nonsynonymous | 0 | 1 |
| VSIG2     | chr11 | 124621378/T//C    | nonsynonymous | 0 | 1 |
| SRPRA     | chr11 | 126138664/C//T    | synonymous    | 0 | 1 |
| SLC2A14   | chr12 | 7981463/C//A      | nonsynonymous | 0 | 1 |
| ADAMTS20  | chr12 | 43826173/G//A     | synonymous    | 0 | 1 |
| KITLG     | chr12 | 88926287/A//G     | synonymous    | 0 | 1 |
| POC1B     | chr12 | 89885733/T//C     | synonymous    | 0 | 1 |
| NUAK1     | chr12 | 106461121/G//T    | nonsynonymous | 0 | 1 |
| LHX5      | chr12 | 113901366/C//T    | synonymous    | 0 | 1 |
| DNAH10    | chr12 | 124383261/C//T    | synonymous    | 0 | 1 |
| SFSWAP    | chr12 | 132241165/G//A    | nonsynonymous | 0 | 1 |



|          |       |                |               |   |   |
|----------|-------|----------------|---------------|---|---|
| MMP17    | chr12 | 132328545/T//C | nonsynonymous | 0 | 1 |
| ULK1     | chr12 | 132405699/C//T | nonsynonymous | 0 | 1 |
| PABPC3   | chr13 | 25671361/C//T  | nonsynonymous | 0 | 1 |
| FRY      | chr13 | 32805413/T//C  | nonsynonymous | 0 | 1 |
| SOHLH2   | chr13 | 36744743/G//A  | synonymous    | 0 | 1 |
| POSTN    | chr13 | 38138692/G//T  | nonsynonymous | 0 | 1 |
| PCDH9    | chr13 | 67477676/G//T  | nonsynonymous | 0 | 1 |
| KCTD12   | chr13 | 77460146/C//T  | synonymous    | 0 | 1 |
| DCT      | chr13 | 95112407/G//T  | nonsynonymous | 0 | 1 |
| ING1     | chr13 | 111368158/C//G | nonsynonymous | 0 | 1 |
| AHNAK2   | chr14 | 105410732/G//T | nonsynonymous | 0 | 1 |
| SNRPN    | chr15 | 25213215/C//A  | synonymous    | 0 | 1 |
| REC114   | chr15 | 73832904/A//G  | nonsynonymous | 0 | 1 |
| CRAMP1   | chr16 | 1664834/C//T   | nonsynonymous | 0 | 1 |
| MEFV     | chr16 | 3293258/G//A   | synonymous    | 0 | 1 |
| APOBR    | chr16 | 28509421/T//C  | nonsynonymous | 0 | 1 |
| CNOT1    | chr16 | 58610468/G//A  | nonsynonymous | 0 | 1 |
| ZC3H18   | chr16 | 88694073/T//G  | nonsynonymous | 0 | 1 |
| CBFA2T3  | chr16 | 88947860/C//T  | nonsynonymous | 0 | 1 |
| VPS53    | chr17 | 422408/C//T    | nonsynonymous | 0 | 1 |
| ASIC2    | chr17 | 31355278/G//A  | nonsynonymous | 0 | 1 |
| RUNDC3A  | chr17 | 42392583/C//G  | nonsynonymous | 0 | 1 |
| EFCAB3   | chr17 | 60469270/G//C  | nonsynonymous | 0 | 1 |
| ANKRD30B | chr18 | 14782537/G//C  | nonsynonymous | 0 | 1 |
| PIGN     | chr18 | 59828548/A//C  | nonsynonymous | 0 | 1 |
| MBD3L2   | chr19 | 7051420/G//A   | synonymous    | 0 | 1 |
| TIMM44   | chr19 | 7999018/C//T   | nonsynonymous | 0 | 1 |
| PRAM1    | chr19 | 8563583/G//A   | nonsynonymous | 0 | 1 |
| OR10H4   | chr19 | 16060413/T//G  | nonsynonymous | 0 | 1 |
| SIN3B    | chr19 | 16976437/G//A  | nonsynonymous | 0 | 1 |
| MYBPC2   | chr19 | 50954553/C//T  | synonymous    | 0 | 1 |
| ZNF766   | chr19 | 52794023/T//G  | nonsynonymous | 0 | 1 |
| UBE2S    | chr19 | 55915737/G//T  | nonsynonymous | 0 | 1 |
| ZFP28    | chr19 | 57050365/G//T  | synonymous    | 0 | 1 |
| HSPA12B  | chr20 | 3731488/C//T   | nonsynonymous | 0 | 1 |
| GINS1    | chr20 | 25397760/G//A  | nonsynonymous | 0 | 1 |
| SLC35C2  | chr20 | 44983780/A//C  | nonsynonymous | 0 | 1 |
| COL20A1  | chr20 | 61940018/C//A  | synonymous    | 0 | 1 |
| ADAMTS1  | chr21 | 28214737/C//A  | nonsynonymous | 0 | 1 |
| PI4KA    | chr22 | 21064236/C//A  | nonsynonymous | 0 | 1 |
| PI4KA    | chr22 | 21097060/A//T  | synonymous    | 0 | 1 |
| C22orf42 | chr22 | 32548049/C//T  | synonymous    | 0 | 1 |
| SHANK3   | chr22 | 51160349/G//A  | nonsynonymous | 0 | 1 |
| RBMXL3   | chrX  | 114427128/C//T | nonsynonymous | 0 | 1 |
| MYOM3    | chr1  | 24419461/G//A  | nonsynonymous | 0 | 1 |
| DBT      | chr1  | 100701028/A//G | nonsynonymous | 0 | 1 |
| SUSD4    | chr1  | 223402618/G//T | nonsynonymous | 0 | 1 |
| RYR2     | chr1  | 237872811/G//A | nonsynonymous | 0 | 1 |
| IL1R2    | chr2  | 102641110/C//T | synonymous    | 0 | 1 |
| RGPD4    | chr2  | 108443467/G//A | synonymous    | 0 | 1 |
| RGPD4    | chr2  | 108455303/G//T | synonymous    | 0 | 1 |
|          | chr3  | 18392838/C//T  | synonymous    | 0 | 1 |
| STAC     | chr3  | 36534690/C//T  | synonymous    | 0 | 1 |
| UBA7     | chr3  | 49849858/C//T  | nonsynonymous | 0 | 1 |
| CHST2    | chr3  | 142840967/C//T | nonsynonymous | 0 | 1 |
| PCDHB11  | chr5  | 140580124/G//A | synonymous    | 0 | 1 |
| FAT2     | chr5  | 150932762/C//T | nonsynonymous | 0 | 1 |
| ATF6B    | chr6  | 32084298/C//T  | nonsynonymous | 0 | 1 |
| PLG      | chr6  | 161174017/G//A | nonsynonymous | 0 | 1 |
| MUC17    | chr7  | 100676930/G//A | nonsynonymous | 0 | 1 |
| C9orf85  | chr9  | 74561949/G//A  | nonsynonymous | 0 | 1 |
| WDFY4    | chr10 | 49931515/C//A  | nonsynonymous | 0 | 1 |
| TRIM22   | chr11 | 5719757/G//A   | synonymous    | 0 | 1 |
| ATM      | chr11 | 108115600/C//T | nonsynonymous | 0 | 1 |
| KIAA1551 | chr12 | 32137850/A//G  | nonsynonymous | 0 | 1 |
| NABP2    | chr12 | 56619209/G//A  | synonymous    | 0 | 1 |
| TNFSF11  | chr13 | 43155352/C//G  | nonsynonymous | 0 | 1 |
| DNAJC3   | chr13 | 96412373/G//A  | nonsynonymous | 0 | 1 |
| NPAP1    | chr15 | 24921354/G//A  | nonsynonymous | 0 | 1 |
| IGDCC4   | chr15 | 65681297/G//A  | synonymous    | 0 | 1 |

|          |       |                 |               |   |   |
|----------|-------|-----------------|---------------|---|---|
| ZNF814   | chr19 | 58385416/C//T   | nonsynonymous | 0 | 1 |
| ZNF814   | chr19 | 58385457/T//C   | nonsynonymous | 0 | 1 |
| ZNF814   | chr19 | 58385460/T//G   | nonsynonymous | 0 | 1 |
| WFDC3    | chr20 | 44417634/C//G   | nonsynonymous | 0 | 1 |
| HDAC1    | chr1  | 32796474/A//G   | nonsynonymous | 0 | 1 |
| MAST2    | chr1  | 46476408/G//A   | nonsynonymous | 0 | 1 |
| MRPS9    | chr2  | 105713637/C//CA | nonsynonymous | 0 | 1 |
| RTP5     | chr2  | 242814314/G//A  | nonsynonymous | 0 | 1 |
| OR5H1    | chr3  | 97852211/G//T   | nonsynonymous | 0 | 1 |
| ST3GAL6  | chr3  | 98512520/A//C   | nonsynonymous | 0 | 1 |
| AADAACL2 | chr3  | 151475326/C//T  | nonsynonymous | 0 | 1 |
| IBSP     | chr4  | 88732780/C//A   | synonymous    | 0 | 1 |
| DCLK2    | chr4  | 151114378/T//C  | nonsynonymous | 0 | 1 |
| SLC25A4  | chr4  | 186066084/A//G  | nonsynonymous | 0 | 1 |
| PCDHB7   | chr5  | 140553838/C//T  | synonymous    | 0 | 1 |
| CYP21A2  | chr6  | 32008819/C//T   | nonsynonymous | 0 | 1 |
| VPS52    | chr6  | 33231635/G//A   | nonsynonymous | 0 | 1 |
| PTCRA    | chr6  | 42883834/C//T   | synonymous    | 0 | 1 |
| NXPH1    | chr7  | 8790740/T//A    | nonsynonymous | 0 | 1 |
| DOCK4    | chr7  | 111644164/G//A  | synonymous    | 0 | 1 |
| FAM160B2 | chr8  | 21955651/G//A   | nonsynonymous | 0 | 1 |
| PPP3CC   | chr8  | 22333119/A//G   | synonymous    | 0 | 1 |
| GATA3    | chr10 | 8100283/G//A    | nonsynonymous | 0 | 1 |
| ANO9     | chr11 | 428571/G//A     | synonymous    | 0 | 1 |
| ARHGEF17 | chr11 | 73074395/G//A   | nonsynonymous | 0 | 1 |
| DNM1L    | chr12 | 32866200/C//T   | nonsynonymous | 0 | 1 |
| CCDC184  | chr12 | 48578199/C//A   | synonymous    | 0 | 1 |
| TMEM119  | chr12 | 108985378/T//A  | nonsynonymous | 0 | 1 |
| NOS1     | chr12 | 117685275/C//T  | nonsynonymous | 0 | 1 |
|          | chr13 | 24471274/G//T   | synonymous    | 0 | 1 |
| SLITRK5  | chr13 | 88329327/G//A   | nonsynonymous | 0 | 1 |
| LRP10    | chr14 | 23346636/C//T   | nonsynonymous | 0 | 1 |
| AP5M1    | chr14 | 57753041/A//C   | synonymous    | 0 | 1 |
| SYNE2    | chr14 | 64460673/T//G   | nonsynonymous | 0 | 1 |
| SIPA1L1  | chr14 | 72055119/A//G   | nonsynonymous | 0 | 1 |
| PPIP5K1  | chr15 | 43827084/T//G   | nonsynonymous | 0 | 1 |
| CEMP1    | chr15 | 81212481/C//T   | nonsynonymous | 0 | 1 |
| CNOT1    | chr16 | 58573716/G//A   | nonsynonymous | 0 | 1 |
| UNC45B   | chr17 | 33486449/C//A   | nonsynonymous | 0 | 1 |
| KRTAP1-5 | chr17 | 39183295/C//T   | nonsynonymous | 0 | 1 |
| EFCAB13  | chr17 | 45425299/A//T   | nonsynonymous | 0 | 1 |
| CD300E   | chr17 | 72613478/G//A   | nonsynonymous | 0 | 1 |
| TMEM94   | chr17 | 73494367/C//T   | nonsynonymous | 0 | 1 |
| MAPK4    | chr18 | 48190167/C//T   | synonymous    | 0 | 1 |
| PPP1R13L | chr19 | 45885980/G//A   | synonymous    | 0 | 1 |
| ZNF835   | chr19 | 57175405/G//A   | nonsynonymous | 0 | 1 |
| EEF1A2   | chr20 | 62127303/A//T   | nonsynonymous | 0 | 1 |
| TUBGCP6  | chr22 | 50659539/T//C   | synonymous    | 0 | 1 |
| TUBGCP6  | chr22 | 50659548/G//A   | synonymous    | 0 | 1 |
| NYX      | chrX  | 41333011/C//T   | nonsynonymous | 0 | 1 |
| NRK      | chrX  | 105167136/A//C  | nonsynonymous | 0 | 1 |
| USP9Y    | chrY  | 14883020/C//T   | nonsynonymous | 0 | 1 |
| SLC2A7   | chr1  | 9063388/C//A    | nonsynonymous | 0 | 1 |
| PIGK     | chr1  | 77620288/T//A   | nonsynonymous | 0 | 1 |
| AQP10    | chr1  | 154296188/A//G  | nonsynonymous | 0 | 1 |
| CD1E     | chr1  | 158324351/C//A  | synonymous    | 0 | 1 |
| OR6K3    | chr1  | 158686988/A//G  | synonymous    | 0 | 1 |
| KCNJ9    | chr1  | 160053820/C//A  | synonymous    | 0 | 1 |
| NOS1AP   | chr1  | 162325150/A//G  | synonymous    | 0 | 1 |
| MAEL     | chr1  | 166990904/G//T  | nonsynonymous | 0 | 1 |
| ANKRD45  | chr1  | 173616131/G//T  | nonsynonymous | 0 | 1 |
| PIK3C2B  | chr1  | 204438710/C//A  | nonsynonymous | 0 | 1 |
| CR1L     | chr1  | 207890911/C//G  | nonsynonymous | 0 | 1 |
| USH2A    | chr1  | 215931944/T//A  | synonymous    | 0 | 1 |
| RPS7     | chr2  | 3624113/A//G    | nonsynonymous | 0 | 1 |
| PLB1     | chr2  | 28763270/A//T   | nonsynonymous | 0 | 1 |
| XDH      | chr2  | 31572984/G//A   | nonsynonymous | 0 | 1 |
| THUMPD2  | chr2  | 39995575/G//T   | nonsynonymous | 0 | 1 |
| SLC8A1   | chr2  | 40656725/G//T   | synonymous    | 0 | 1 |
| SOWAHC   | chr2  | 110372705/C//T  | synonymous    | 0 | 1 |

|              |       |                  |               |   |   |
|--------------|-------|------------------|---------------|---|---|
| PKP4         | chr2  | 159481856/C//G   | nonsynonymous | 0 | 1 |
| XIRP2        | chr2  | 168107831/A//G   | nonsynonymous | 0 | 1 |
| FSIP2        | chr2  | 186665802/C//T   | synonymous    | 0 | 1 |
| SATB2        | chr2  | 200245097/G//T   | nonsynonymous | 0 | 1 |
| ERBB4        | chr2  | 212530049/C//A   | nonsynonymous | 0 | 1 |
| PER2         | chr2  | 239161814/G//A   | synonymous    | 0 | 1 |
| CHL1         | chr3  | 440757/G//T      | nonsynonymous | 0 | 1 |
| ZCWPW2       | chr3  | 28454850/T//C    | synonymous    | 0 | 1 |
| TOPAZ1       | chr3  | 44285531/C//A    | synonymous    | 0 | 1 |
| PLXNB1       | chr3  | 48461659/A//G    | nonsynonymous | 0 | 1 |
| COL7A1       | chr3  | 48626415/C//A    | synonymous    | 0 | 1 |
| CADM2        | chr3  | 86114834/G//A    | synonymous    | 0 | 1 |
| CPOX         | chr3  | 98311967/T//A    | nonsynonymous | 0 | 1 |
| SLC9C1       | chr3  | 112005686/A//G   | synonymous    | 0 | 1 |
| TF           | chr3  | 133475157/T//A   | nonsynonymous | 0 | 1 |
| PPP2R3A      | chr3  | 135721613/A//T   | nonsynonymous | 0 | 1 |
| GABRA2       | chr4  | 46312240/A//T    | nonsynonymous | 0 | 1 |
| PTPN13       | chr4  | 87662855/A//G    | synonymous    | 0 | 1 |
| ALPK1        | chr4  | 113362167/G//C   | nonsynonymous | 0 | 1 |
| NIPBL        | chr5  | 37017244/A//G    | nonsynonymous | 0 | 1 |
| BDP1         | chr5  | 70840887/C//A    | nonsynonymous | 0 | 1 |
| VCAN         | chr5  | 82789425/A//G    | nonsynonymous | 0 | 1 |
| HAPLN1       | chr5  | 82937440/C//A    | nonsynonymous | 0 | 1 |
| PCDHGA12     | chr5  | 140811150/C//T   | nonsynonymous | 0 | 1 |
| GABRA6       | chr5  | 161113004/G//T   | synonymous    | 0 | 1 |
| ADAMTS2      | chr5  | 178699986/T//G   | nonsynonymous | 0 | 1 |
| GFPT2        | chr5  | 179765495/G//T   | nonsynonymous | 0 | 1 |
| C4B          | chr6  | 31996613/A//G    | nonsynonymous | 0 | 1 |
| TNXB         | chr6  | 32041679/G//A    | nonsynonymous | 0 | 1 |
| HLA-DQB1-AS1 | chr6  | 32628473/T//C    | synonymous    | 0 | 1 |
| ADGB         | chr6  | 147061710/T//C   | nonsynonymous | 0 | 1 |
| GPR31        | chr6  | 167571229/C//T   | nonsynonymous | 0 | 1 |
| DNAAF5       | chr7  | 794237/G//C      | nonsynonymous | 0 | 1 |
| EIF2AK1      | chr7  | 6066486/G//A     | nonsynonymous | 0 | 1 |
| ADCY1        | chr7  | 45725769/C//A    | nonsynonymous | 0 | 1 |
| HEPACAM2     | chr7  | 92821669/CT//C   | nonsynonymous | 0 | 1 |
| MUC17        | chr7  | 100678426/C//G   | synonymous    | 0 | 1 |
| GPR22        | chr7  | 107115527/C//G   | nonsynonymous | 0 | 1 |
| MKRN1        | chr7  | 140158824/T//C   | nonsynonymous | 0 | 1 |
| BRAF         | chr7  | 140481405/A//G   | nonsynonymous | 0 | 1 |
| CSMD1        | chr8  | 2807761/C//G     | nonsynonymous | 0 | 1 |
| CSMD1        | chr8  | 3216856/T//A     | nonsynonymous | 0 | 1 |
| TNKS         | chr8  | 9414078/A//G     | nonsynonymous | 0 | 1 |
| INTS10       | chr8  | 19700402/G//T    | nonsynonymous | 0 | 1 |
| HR           | chr8  | 21985178/C//T    | synonymous    | 0 | 1 |
| DPYSL2       | chr8  | 26439579/T//C    | synonymous    | 0 | 1 |
| PXDNL        | chr8  | 52361653/G//T    | synonymous    | 0 | 1 |
| OPRK1        | chr8  | 54142031/A//G    | synonymous    | 0 | 1 |
| FBXO32       | chr8  | 124553374/G//A   | synonymous    | 0 | 1 |
| ZNF517       | chr8  | 146033387/G//T   | nonsynonymous | 0 | 1 |
| ADAMTSL1     | chr9  | 18636003/C//A    | nonsynonymous | 0 | 1 |
| APBA1        | chr9  | 72082830/T//C    | nonsynonymous | 0 | 1 |
| FRMD3        | chr9  | 86004519/C//T    | synonymous    | 0 | 1 |
| SPATA31C1    | chr9  | 90537104/G//T    | nonsynonymous | 0 | 1 |
| WNK2         | chr9  | 95992125/C//T    | synonymous    | 0 | 1 |
| TGFBR1       | chr9  | 101891260/A//T   | nonsynonymous | 0 | 1 |
| RNF20        | chr9  | 104324622/G//A   | nonsynonymous | 0 | 1 |
| FAM107B      | chr10 | 14816374/T//A    | synonymous    | 0 | 1 |
| FAM171A1     | chr10 | 15256602/T//A    | nonsynonymous | 0 | 1 |
| ANKRD26      | chr10 | 27324503/G//C    | nonsynonymous | 0 | 1 |
| RBP3         | chr10 | 48381922/G//T    | nonsynonymous | 0 | 1 |
| DLG5         | chr10 | 79588697/C//A    | synonymous    | 0 | 1 |
| CRTAC1       | chr10 | 99695973/G//C    | nonsynonymous | 0 | 1 |
| PHRF1        | chr11 | 607990/G//T      | nonsynonymous | 0 | 1 |
| OR51G2       | chr11 | 4936814/C//G     | nonsynonymous | 0 | 1 |
| ARHGAP1      | chr11 | 46702071/TACA//T | nonsynonymous | 0 | 1 |
| OR8H1        | chr11 | 56058176/G//T    | synonymous    | 0 | 1 |
| LRRCS55      | chr11 | 56949613/C//A    | synonymous    | 0 | 1 |
| OR5B17       | chr11 | 58126195/C//A    | nonsynonymous | 0 | 1 |
| PTGDR2       | chr11 | 60620580/G//T    | nonsynonymous | 0 | 1 |

|          |       |                |               |   |   |
|----------|-------|----------------|---------------|---|---|
| FERMT3   | chr11 | 63987048/C//T  | nonsynonymous | 0 | 1 |
| BBS1     | chr11 | 66294198/C//T  | nonsynonymous | 0 | 1 |
| INPPL1   | chr11 | 71943716/G//T  | nonsynonymous | 0 | 1 |
| PHOX2A   | chr11 | 71952294/T//C  | nonsynonymous | 0 | 1 |
| CEP126   | chr11 | 101834572/A//G | nonsynonymous | 0 | 1 |
| ARHGAP20 | chr11 | 110454276/T//C | nonsynonymous | 0 | 1 |
| NXPE4    | chr11 | 114453065/A//G | nonsynonymous | 0 | 1 |
| C11orf63 | chr11 | 122817475/A//G | nonsynonymous | 0 | 1 |
| CACNA1C  | chr12 | 2676860/G//T   | nonsynonymous | 0 | 1 |
| A2ML1    | chr12 | 9004443/G//C   | nonsynonymous | 0 | 1 |
|          | chr12 | 19500079/A//G  | synonymous    | 0 | 1 |
| HELB     | chr12 | 66709068/A//G  | synonymous    | 0 | 1 |
| CPSF6    | chr12 | 69645098/T//C  | nonsynonymous | 0 | 1 |
| C12orf50 | chr12 | 88383124/C//A  | nonsynonymous | 0 | 1 |
| GAS2L3   | chr12 | 101018412/G//C | nonsynonymous | 0 | 1 |
| RPH3A    | chr12 | 113306312/G//T | nonsynonymous | 0 | 1 |
| LHX5     | chr12 | 113901093/C//A | nonsynonymous | 0 | 1 |
| MPHOSPH9 | chr12 | 123665710/C//A | nonsynonymous | 0 | 1 |
| ZNF268   | chr12 | 133780052/G//T | nonsynonymous | 0 | 1 |
| IL17D    | chr13 | 21296149/G//A  | synonymous    | 0 | 1 |
| ELF1     | chr13 | 41508168/T//C  | synonymous    | 0 | 1 |
| RUBCNL   | chr13 | 46924319/G//T  | nonsynonymous | 0 | 1 |
| ZNF219   | chr14 | 21558970/G//A  | nonsynonymous | 0 | 1 |
| CHD8     | chr14 | 21873881/T//C  | nonsynonymous | 0 | 1 |
| FBXO33   | chr14 | 39868589/T//C  | synonymous    | 0 | 1 |
| GOLGA5   | chr14 | 93263997/A//G  | nonsynonymous | 0 | 1 |
| SERPINA6 | chr14 | 94780755/C//A  | synonymous    | 0 | 1 |
| OCA2     | chr15 | 28171368/G//C  | nonsynonymous | 0 | 1 |
| HERC2    | chr15 | 28501322/G//A  | nonsynonymous | 0 | 1 |
| CTDSPL2  | chr15 | 44791968/C//T  | nonsynonymous | 0 | 1 |
| STARD5   | chr15 | 81616503/G//T  | synonymous    | 0 | 1 |
| ACAN     | chr15 | 89400351/G//C  | nonsynonymous | 0 | 1 |
| GRIN2A   | chr16 | 10031932/GC//G | nonsynonymous | 0 | 1 |
| DNAH3    | chr16 | 21065827/A//C  | nonsynonymous | 0 | 1 |
| ERN2     | chr16 | 23706116/G//T  | nonsynonymous | 0 | 1 |
| VKORC1   | chr16 | 31102617/G//C  | synonymous    | 0 | 1 |
| CES5A    | chr16 | 55893494/C//G  | nonsynonymous | 0 | 1 |
| ZFH3     | chr16 | 72830277/T//G  | nonsynonymous | 0 | 1 |
| MAF      | chr16 | 79632636/G//A  | synonymous    | 0 | 1 |
| CYB5D2   | chr17 | 4053213/C//A   | synonymous    | 0 | 1 |
| TP53     | chr17 | 7578556/T//C   | nonsynonymous | 0 | 1 |
| NF1      | chr17 | 29684286/G//C  | nonsynonymous | 0 | 1 |
| HEATR9   | chr17 | 34186082/G//T  | synonymous    | 0 | 1 |
| LRRC37A2 | chr17 | 44625995/G//T  | nonsynonymous | 0 | 1 |
| COPZ2    | chr17 | 46114262/CT//C | nonsynonymous | 0 | 1 |
| LPO      | chr17 | 56329718/G//A  | nonsynonymous | 0 | 1 |
|          | chr17 | 63822349/C//T  | synonymous    | 0 | 1 |
| ABCA8    | chr17 | 66890327/C//A  | nonsynonymous | 0 | 1 |
| MYOM1    | chr18 | 3100355/A//G   | synonymous    | 0 | 1 |
| CIDEA    | chr18 | 12262838/T//C  | nonsynonymous | 0 | 1 |
| ANKRD30B | chr18 | 14763954/G//C  | nonsynonymous | 0 | 1 |
| TMX3     | chr18 | 66344103/T//C  | synonymous    | 0 | 1 |
| CNDP2    | chr18 | 72173113/T//A  | synonymous    | 0 | 1 |
| ZNF221   | chr19 | 44470737/A//G  | nonsynonymous | 0 | 1 |
| EPS8L1   | chr19 | 55591205/G//A  | nonsynonymous | 0 | 1 |
| TGM3     | chr20 | 2312943/G//T   | synonymous    | 0 | 1 |
| ADAM33   | chr20 | 3650290/C//A   | synonymous    | 0 | 1 |
| BFSP1    | chr20 | 17475180/A//G  | nonsynonymous | 0 | 1 |
| DSTN     | chr20 | 17581599/A//G  | nonsynonymous | 0 | 1 |
| RRBP1    | chr20 | 17610500/T//C  | nonsynonymous | 0 | 1 |
| CTSA     | chr20 | 44520316/C//T  | nonsynonymous | 0 | 1 |
| FAM65C   | chr20 | 49219088/C//A  | nonsynonymous | 0 | 1 |
| KCNG1    | chr20 | 49621035/C//G  | synonymous    | 0 | 1 |
| CTCF     | chr20 | 56099210/C//A  | nonsynonymous | 0 | 1 |
| COL9A3   | chr20 | 61460973/T//A  | synonymous    | 0 | 1 |
| FBXO7    | chr22 | 32875097/G//A  | synonymous    | 0 | 1 |
| CACNA11  | chr22 | 40075205/G//T  | nonsynonymous | 0 | 1 |
| MXRA5    | chrX  | 3235264/G//T   | nonsynonymous | 0 | 1 |
| ZNF645   | chrX  | 22291576/T//C  | synonymous    | 0 | 1 |
| MAGEB18  | chrX  | 26157185/C//T  | nonsynonymous | 0 | 1 |

|          |       |                       |               |   |   |
|----------|-------|-----------------------|---------------|---|---|
| GK       | chrX  | 30709277/T//C         | synonymous    | 0 | 1 |
| KDM6A    | chrX  | 44922694/C//T         | nonsynonymous | 0 | 1 |
| ITIH6    | chrX  | 54785415/T//A         | synonymous    | 0 | 1 |
| SLC16A2  | chrX  | 73745723/T//C         | synonymous    | 0 | 1 |
| KLHL4    | chrX  | 86887267/C//A         | nonsynonymous | 0 | 1 |
| IRS4     | chrX  | 107978566/T//C        | nonsynonymous | 0 | 1 |
| TRPC5    | chrX  | 111155562/T//C        | nonsynonymous | 0 | 1 |
| ATP11C   | chrX  | 138850522/C//A        | nonsynonymous | 0 | 1 |
| PANK4    | chr1  | 2458066/A//C          | synonymous    | 0 | 1 |
| INPP5B   | chr1  | 38353986/C//G         | synonymous    | 0 | 1 |
| ERICH3   | chr1  | 75097618/A//G         | synonymous    | 0 | 1 |
| CYB561D1 | chr1  | 110038394/C//T        | nonsynonymous | 0 | 1 |
| FCGR3B   | chr1  | 161599823/C//G        | nonsynonymous | 0 | 1 |
| RRP15    | chr1  | 218475632/A//G        | synonymous    | 0 | 1 |
| ARID4B   | chr1  | 235383732/T//G        | nonsynonymous | 0 | 1 |
| LYST     | chr1  | 235969303/T//C        | nonsynonymous | 0 | 1 |
| C1orf101 | chr1  | 244745115/G//C        | nonsynonymous | 0 | 1 |
| OR14A16  | chr1  | 247978783/A//T        | synonymous    | 0 | 1 |
| VAX2     | chr2  | 71160273/C//T         | nonsynonymous | 0 | 1 |
| NEB      | chr2  | 152394698/G//C        | nonsynonymous | 0 | 1 |
| SCN2A    | chr2  | 166237194/T//A        | synonymous    | 0 | 1 |
| TLK1     | chr2  | 171910364/C//G        | nonsynonymous | 0 | 1 |
| THUMPD3  | chr3  | 9413046/G//A          | synonymous    | 0 | 1 |
| WNT7A    | chr3  | 13916473/C//T         | nonsynonymous | 0 | 1 |
| TTC21A   | chr3  | 39178525/T//C         | synonymous    | 0 | 1 |
| TTC21A   | chr3  | 39178527/T//G         | nonsynonymous | 0 | 1 |
| PTPN23   | chr3  | 47447807/C//T         | synonymous    | 0 | 1 |
| TLR9     | chr3  | 52256186/C//T         | nonsynonymous | 0 | 1 |
| DHX36    | chr3  | 154042189/T//A        | nonsynonymous | 0 | 1 |
| NLGN1    | chr3  | 173998959/A//G        | nonsynonymous | 0 | 1 |
| ATP13A4  | chr3  | 193232645/G//A        | nonsynonymous | 0 | 1 |
| BEND4    | chr4  | 42145714/A//T         | nonsynonymous | 0 | 1 |
| TEC      | chr4  | 48158723/T//A         | nonsynonymous | 0 | 1 |
| WDFY3    | chr4  | 85696073/T//C         | nonsynonymous | 0 | 1 |
| FAT4     | chr4  | 126367446/A//G        | synonymous    | 0 | 1 |
| MIER3    | chr5  | 56231254/C//T         | nonsynonymous | 0 | 1 |
| AGGF1    | chr5  | 76326763/C//G         | nonsynonymous | 0 | 1 |
| OTP      | chr5  | 76933026/G//T         | nonsynonymous | 0 | 1 |
| PCDHA8   | chr5  | 140221210/T//G        | nonsynonymous | 0 | 1 |
| PCDHA8   | chr5  | 140222384/C//G        | nonsynonymous | 0 | 1 |
| SOX4     | chr6  | 21595443/C//T         | synonymous    | 0 | 1 |
| GPX5     | chr6  | 28500126/C//G         | nonsynonymous | 0 | 1 |
| PKHD1    | chr6  | 51875159/G//T         | nonsynonymous | 0 | 1 |
| RIMS1    | chr6  | 72952062/C//A         | nonsynonymous | 0 | 1 |
| GJA1     | chr6  | 121768087/T//C        | nonsynonymous | 0 | 1 |
| ETV1     | chr7  | 13935712/C//G         | nonsynonymous | 0 | 1 |
| FERD3L   | chr7  | 19184586/C//T         | nonsynonymous | 0 | 1 |
| NOD1     | chr7  | 30491162/AGGT//A      | nonsynonymous | 0 | 1 |
| NOD1     | chr7  | 30491167/TGCCACAGG//T | nonsynonymous | 0 | 1 |
| MUC17    | chr7  | 100684021/A//G        | synonymous    | 0 | 1 |
| PTPRZ1   | chr7  | 121652018/A//C        | nonsynonymous | 0 | 1 |
| PAX4     | chr7  | 127253804/C//T        | synonymous    | 0 | 1 |
| CHRM2    | chr7  | 136699742/G//C        | nonsynonymous | 0 | 1 |
| ASH2L    | chr8  | 37990996/T//G         | nonsynonymous | 0 | 1 |
| ANK1     | chr8  | 41575628/G//C         | nonsynonymous | 0 | 1 |
| PLAT     | chr8  | 42037773/G//T         | nonsynonymous | 0 | 1 |
| PDE7A    | chr8  | 66639535/A//T         | nonsynonymous | 0 | 1 |
| ZFH4     | chr8  | 77767286/C//A         | nonsynonymous | 0 | 1 |
| CSMD3    | chr8  | 113323376/T//C        | synonymous    | 0 | 1 |
| GSDMC    | chr8  | 130760986/C//A        | nonsynonymous | 0 | 1 |
| OC90     | chr8  | 133036881/G//C        | nonsynonymous | 0 | 1 |
| RANBP6   | chr9  | 6013490/T//G          | nonsynonymous | 0 | 1 |
| CCDC171  | chr9  | 15729604/A//G         | synonymous    | 0 | 1 |
|          | chr9  | 18684851/A//G         | synonymous    | 0 | 1 |
| IPPK     | chr9  | 95432371/C//T         | synonymous    | 0 | 1 |
| NR4A3    | chr9  | 102606946/C//T        | nonsynonymous | 0 | 1 |
| MUSK     | chr9  | 113457811/G//T        | nonsynonymous | 0 | 1 |
| TTC16    | chr9  | 130487133/G//A        | nonsynonymous | 0 | 1 |
| EBLN1    | chr10 | 22498085/T//G         | synonymous    | 0 | 1 |
| NRP1     | chr10 | 33502469/T//C         | nonsynonymous | 0 | 1 |

|           |       |                          |               |   |   |
|-----------|-------|--------------------------|---------------|---|---|
| SUPV3L1   | chr10 | 70968608/C//G            | synonymous    | 0 | 1 |
| DLG5      | chr10 | 79601840/C//T            | synonymous    | 0 | 1 |
| RBM20     | chr10 | 112595661/G//A           | synonymous    | 0 | 1 |
| C10orf120 | chr10 | 124457815/T//C           | nonsynonymous | 0 | 1 |
| PHRF1     | chr11 | 608928/C//T              | nonsynonymous | 0 | 1 |
| CD44      | chr11 | 35250781/G//T            | synonymous    | 0 | 1 |
| OR9G4     | chr11 | 56510374/T//C            | nonsynonymous | 0 | 1 |
| ZNHIT2    | chr11 | 64885138/C//T            | synonymous    | 0 | 1 |
| NAALAD2   | chr11 | 89883672/A//G            | nonsynonymous | 0 | 1 |
| LETMD1    | chr12 | 51449611/C//A            | synonymous    | 0 | 1 |
| SRGAP1    | chr12 | 64521781/G//A            | nonsynonymous | 0 | 1 |
| ATXN7L3B  | chr12 | 74931916/C//T            | synonymous    | 0 | 1 |
| GLIPR1L2  | chr12 | 75807414/G//A            | nonsynonymous | 0 | 1 |
| HPD       | chr12 | 122294261/A//T           | nonsynonymous | 0 | 1 |
| AACS      | chr12 | 125626685/C//T           | synonymous    | 0 | 1 |
| SMAD9     | chr13 | 37446937/G//C            | synonymous    | 0 | 1 |
| UGGT2     | chr13 | 96454072/A//C            | synonymous    | 0 | 1 |
| COL4A1    | chr13 | 110855905/T//G           | synonymous    | 0 | 1 |
| ACIN1     | chr14 | 23549382/G//T            | nonsynonymous | 0 | 1 |
| IFT43     | chr14 | 76549605/G//A            | synonymous    | 0 | 1 |
| LTK       | chr15 | 41799849/T//C            | nonsynonymous | 0 | 1 |
| GLDN      | chr15 | 51692573/C//A            | nonsynonymous | 0 | 1 |
| NLRC3     | chr16 | 3614068/G//A             | synonymous    | 0 | 1 |
| SF3B3     | chr16 | 70588956/C//G            | synonymous    | 0 | 1 |
| TUBB3     | chr16 | 90001295/G//A            | nonsynonymous | 0 | 1 |
| USP6      | chr17 | 5045324/C//G             | nonsynonymous | 0 | 1 |
| ALOXE3    | chr17 | 8014817/A//T             | nonsynonymous | 0 | 1 |
| GPR179    | chr17 | 36486026/G//A            | synonymous    | 0 | 1 |
| ATP9B     | chr18 | 77063705/T//G            | nonsynonymous | 0 | 1 |
| ZNF382    | chr19 | 37117178/C//T            | nonsynonymous | 0 | 1 |
| ZNF585A   | chr19 | 37644138/T//A            | nonsynonymous | 0 | 1 |
| ZNF574    | chr19 | 42583621/G//A            | nonsynonymous | 0 | 1 |
| ZNF473    | chr19 | 50548644/C//G            | nonsynonymous | 0 | 1 |
| ZNF761    | chr19 | 53958582/AGT//A          | nonsynonymous | 0 | 1 |
| USP29     | chr19 | 57641511/A//T            | nonsynonymous | 0 | 1 |
| SIGLEC1   | chr20 | 3677789/G//A             | nonsynonymous | 0 | 1 |
| CHGB      | chr20 | 5903660/C//T             | synonymous    | 0 | 1 |
| CHGB      | chr20 | 5905728/C//A             | synonymous    | 0 | 1 |
| CFAP61    | chr20 | 20071507/C//G            | nonsynonymous | 0 | 1 |
| KRTAP19-6 | chr21 | 31914019/C//T            | nonsynonymous | 0 | 1 |
| KRTAP22-1 | chr21 | 31973566/T//C            | nonsynonymous | 0 | 1 |
| KRTAP10-2 | chr21 | 45970820/G//T            | synonymous    | 0 | 1 |
| CECR2     | chr22 | 18028831/A//T            | nonsynonymous | 0 | 1 |
| KIAA1671  | chr22 | 25434890/A//G            | nonsynonymous | 0 | 1 |
| TTC28     | chr22 | 28379401/G//C            | nonsynonymous | 0 | 1 |
| SLC7A3    | chrX  | 70149555/T//C            | nonsynonymous | 0 | 1 |
| H6PD      | chr1  | 9305286/A//G             | nonsynonymous | 0 | 1 |
| ALDH4A1   | chr1  | 19228965/GTCCAGGGGCGGGAC | nonsynonymous | 0 | 1 |
| NBPF3     | chr1  | 21798079/T//C            | nonsynonymous | 0 | 1 |
| CDCA8     | chr1  | 38167486/A//G            | nonsynonymous | 0 | 1 |
| UTP11     | chr1  | 38489310/G//C            | synonymous    | 0 | 1 |
| MACF1     | chr1  | 39950406/A//C            | synonymous    | 0 | 1 |
| TCHH      | chr1  | 152080106/C//G           | nonsynonymous | 0 | 1 |
| CRTC2     | chr1  | 153931096/G//C           | synonymous    | 0 | 1 |
| ATP8B2    | chr1  | 154315609/C//G           | nonsynonymous | 0 | 1 |
| RUSC1     | chr1  | 155296719/C//A           | nonsynonymous | 0 | 1 |
| DDX59     | chr1  | 200617700/C//G           | synonymous    | 0 | 1 |
| NAV1      | chr1  | 201755706/G//C           | nonsynonymous | 0 | 1 |
| NVL       | chr1  | 224455731/C//T           | synonymous    | 0 | 1 |
| PARP1     | chr1  | 226550865/T//C           | synonymous    | 0 | 1 |
| POMC      | chr2  | 25384395/C//T            | nonsynonymous | 0 | 1 |
| GALNT14   | chr2  | 31360996/G//A            | synonymous    | 0 | 1 |
| USP34     | chr2  | 61417725/A//G            | synonymous    | 0 | 1 |
| CHCHD5    | chr2  | 113343579/T//C           | nonsynonymous | 0 | 1 |
| LCT       | chr2  | 136575345/T//C           | nonsynonymous | 0 | 1 |
| SLC4A10   | chr2  | 162804145/G//T           | nonsynonymous | 0 | 1 |
| TTC21B    | chr2  | 166781115/G//A           | nonsynonymous | 0 | 1 |
| SACM1L    | chr3  | 45761098/G//C            | synonymous    | 0 | 1 |
| QRICH1    | chr3  | 49070214/A//G            | synonymous    | 0 | 1 |
| ABHD6     | chr3  | 58256696/A//G            | nonsynonymous | 0 | 1 |

|                 |       |                           |               |   |   |
|-----------------|-------|---------------------------|---------------|---|---|
| DZIP3           | chr3  | 108391435/C//T            | synonymous    | 0 | 1 |
| ZNF80           | chr3  | 113955443/A//G            | nonsynonymous | 0 | 1 |
| PARP15          | chr3  | 122354967/G//C            | synonymous    | 0 | 1 |
| PARP15          | chr3  | 122354977/A//C            | synonymous    | 0 | 1 |
| SEMA5B          | chr3  | 122667372/GTGCCTGCTAAGGGC | nonsynonymous | 0 | 1 |
| RBP2            | chr3  | 139195319/C//A            | synonymous    | 0 | 1 |
| CPA3            | chr3  | 148601493/G//C            | nonsynonymous | 0 | 1 |
| TMEM44          | chr3  | 194336434/G//T            | synonymous    | 0 | 1 |
| CPEB2           | chr4  | 15009985/A//G             | synonymous    | 0 | 1 |
| C1QTNF7         | chr4  | 15444081/G//A             | synonymous    | 0 | 1 |
| CCDC158         | chr4  | 77317449/G//C             | synonymous    | 0 | 1 |
| THAP9           | chr4  | 83840137/C//G             | synonymous    | 0 | 1 |
| NDNF            | chr4  | 121957926/ATTCTGAGACAGAAG | nonsynonymous | 0 | 1 |
| BRD9            | chr5  | 864662/A//G               | nonsynonymous | 0 | 1 |
| RAD1            | chr5  | 34908983/C//T             | nonsynonymous | 0 | 1 |
| DNAJC21         | chr5  | 34950370/G//A             | synonymous    | 0 | 1 |
| MARVELD2        | chr5  | 68716011/A//G             | nonsynonymous | 0 | 1 |
| NR2F1           | chr5  | 92923981/G//T             | synonymous    | 0 | 1 |
| UBE2D2          | chr5  | 138994367/A//T            | synonymous    | 0 | 1 |
| PXDC1           | chr6  | 3727807/C//A              | nonsynonymous | 0 | 1 |
| DPCR1           | chr6  | 30917219/T//C             | synonymous    | 0 | 1 |
| PHIP            | chr6  | 79656573/G//A             | nonsynonymous | 0 | 1 |
| PDSS2           | chr6  | 107780219/G//A            | nonsynonymous | 0 | 1 |
| TMEM248         | chr7  | 66418290/C//G             | nonsynonymous | 0 | 1 |
| HIP1            | chr7  | 75189110/C//T             | nonsynonymous | 0 | 1 |
| CYP3A7-CYP3A51F | chr7  | 99319952/A//G             | nonsynonymous | 0 | 1 |
| GALNT11         | chr7  | 151805155/G//A            | nonsynonymous | 0 | 1 |
| GALNT11         | chr7  | 151805233/G//C            | nonsynonymous | 0 | 1 |
| DNAJB6          | chr7  | 157175039/C//G            | nonsynonymous | 0 | 1 |
| CHMP7           | chr8  | 23116316/A//T             | synonymous    | 0 | 1 |
| SLC39A4         | chr8  | 145641404/C//T            | synonymous    | 0 | 1 |
| NFX1            | chr9  | 33354118/G//A             | nonsynonymous | 0 | 1 |
| KIAA1161        | chr9  | 34372821/C//T             | nonsynonymous | 0 | 1 |
| PAPPA           | chr9  | 118989827/A//C            | synonymous    | 0 | 1 |
| KCNT1           | chr9  | 138678253/G//A            | nonsynonymous | 0 | 1 |
| FBXW5           | chr9  | 139836132/G//C            | nonsynonymous | 0 | 1 |
| AKR1C3          | chr10 | 5147786/G//C              | nonsynonymous | 0 | 1 |
| ST8SIA6         | chr10 | 17369110/C//A             | nonsynonymous | 0 | 1 |
| SLC18A3         | chr10 | 50818816/C//A             | synonymous    | 0 | 1 |
| CSTF2T          | chr10 | 53458329/TCGAGGAGGCAGACC  | nonsynonymous | 0 | 1 |
| MAT1A           | chr10 | 82045329/C//G             | nonsynonymous | 0 | 1 |
| PTEN            | chr10 | 89720680/A//T             | synonymous    | 0 | 1 |
| NRAP            | chr10 | 115380395/G//A            | nonsynonymous | 0 | 1 |
| CTBP2           | chr10 | 126678262/G//A            | nonsynonymous | 0 | 1 |
| OR52I2          | chr11 | 4608800/A//G              | nonsynonymous | 0 | 1 |
| PPFIBP2         | chr11 | 7672991/G//C              | nonsynonymous | 0 | 1 |
| TMEM86A         | chr11 | 18720415/AGCC//A          | synonymous    | 0 | 1 |
| DCDC5           | chr11 | 30942323/A//C             | nonsynonymous | 0 | 1 |
| CRY2            | chr11 | 45893783/G//A             | synonymous    | 0 | 1 |
| OR4C16          | chr11 | 55340534/T//A             | nonsynonymous | 0 | 1 |
| APLNR           | chr11 | 57004359/G//C             | synonymous    | 0 | 1 |
| CD6             | chr11 | 60775301/A//G             | nonsynonymous | 0 | 1 |
| NDUFV1          | chr11 | 67378617/C//G             | nonsynonymous | 0 | 1 |
| AMOTL1          | chr11 | 94602619/A//G             | synonymous    | 0 | 1 |
| CDON            | chr11 | 125887003/G//C            | nonsynonymous | 0 | 1 |
| ADAMTS15        | chr11 | 130319382/T//G            | nonsynonymous | 0 | 1 |
| OPCML           | chr11 | 132812943/C//T            | synonymous    | 0 | 1 |
| B4GALNT3        | chr12 | 653514/CGTGCCAACCT//C     | nonsynonymous | 0 | 1 |
| TIGAR           | chr12 | 4430410/G//A              | synonymous    | 0 | 1 |
| VWF             | chr12 | 6166139/T//C              | nonsynonymous | 0 | 1 |
| CLEC4D          | chr12 | 8673933/T//C              | synonymous    | 0 | 1 |
| KRT84           | chr12 | 52771743/C//G             | synonymous    | 0 | 1 |
| OSBPL8          | chr12 | 76796469/CTTAAGAGATTCTTTT | nonsynonymous | 0 | 1 |
| APAF1           | chr12 | 99043418/C//G             | nonsynonymous | 0 | 1 |
| SLC41A2         | chr12 | 105238246/T//C            | synonymous    | 0 | 1 |
| ANKRD13A        | chr12 | 110450976/A//G            | synonymous    | 0 | 1 |
| ALDH2           | chr12 | 112223142/A//G            | synonymous    | 0 | 1 |
| TBX3            | chr12 | 115112499/G//A            | nonsynonymous | 0 | 1 |
| SETD1B          | chr12 | 122242664/CCA//C          | nonsynonymous | 0 | 1 |
| SETD1B          | chr12 | 122242666/A//C            | nonsynonymous | 0 | 1 |

|          |       |                           |               |   |   |
|----------|-------|---------------------------|---------------|---|---|
| BRCA2    | chr13 | 32910685/A//G             | synonymous    | 0 | 1 |
| ELF1     | chr13 | 41533147/A//T             | synonymous    | 0 | 1 |
| IRS2     | chr13 | 110435229/C//T            | nonsynonymous | 0 | 1 |
| ADPRHL1  | chr13 | 114107738/C//G            | nonsynonymous | 0 | 1 |
| PRKD1    | chr14 | 30102069/T//C             | synonymous    | 0 | 1 |
| LRR1     | chr14 | 50069124/G//A             | nonsynonymous | 0 | 1 |
| UNC79    | chr14 | 94053172/C//G             | nonsynonymous | 0 | 1 |
| CA12     | chr15 | 63634225/G//C             | synonymous    | 0 | 1 |
| HERC1    | chr15 | 64067047/C//G             | nonsynonymous | 0 | 1 |
| CPLX3    | chr15 | 75122727/C//T             | synonymous    | 0 | 1 |
| TBC1D2B  | chr15 | 78305552/T//C             | nonsynonymous | 0 | 1 |
| ARL2BP   | chr16 | 57279230/C//A             | synonymous    | 0 | 1 |
| CDH11    | chr16 | 65032582/T//A             | nonsynonymous | 0 | 1 |
| TXNL4B   | chr16 | 72120574/T//G             | nonsynonymous | 0 | 1 |
| RFWD3    | chr16 | 74695257/C//G             | nonsynonymous | 0 | 1 |
| CBFA2T3  | chr16 | 88958307/C//G             | nonsynonymous | 0 | 1 |
| RNF135   | chr17 | 29298321/T//A             | nonsynonymous | 0 | 1 |
| TMEM94   | chr17 | 73492483/C//G             | synonymous    | 0 | 1 |
| UBE2O    | chr17 | 74392547/A//G             | nonsynonymous | 0 | 1 |
| BAHCC1   | chr17 | 79409306/G//C             | nonsynonymous | 0 | 1 |
| ANKRD12  | chr18 | 9281004/G//A              | nonsynonymous | 0 | 1 |
| TSPAN16  | chr19 | 11407040/G//A             | nonsynonymous | 0 | 1 |
| EPOR     | chr19 | 11493822/C//A             | nonsynonymous | 0 | 1 |
| ZNF254   | chr19 | 24270043/C//G             | synonymous    | 0 | 1 |
| ZNF845   | chr19 | 53855304/G//T             | nonsynonymous | 0 | 1 |
| ZNF628   | chr19 | 55994600/C//G             | synonymous    | 0 | 1 |
| CDC25B   | chr20 | 3783027/C//T              | synonymous    | 0 | 1 |
| PFDN4    | chr20 | 52824652/A//G             | nonsynonymous | 0 | 1 |
| EDN3     | chr20 | 57876689/C//A             | synonymous    | 0 | 1 |
| MYT1     | chr20 | 62839046/C//G             | nonsynonymous | 0 | 1 |
| SYNJ1    | chr21 | 34059355/C//G             | nonsynonymous | 0 | 1 |
| ATXN10   | chr22 | 46125462/G//C             | nonsynonymous | 0 | 1 |
| PUDP     | chrX  | 7023768/G//A              | nonsynonymous | 0 | 1 |
| MAGEB16  | chrX  | 35820253/G//C             | synonymous    | 0 | 1 |
| ALAS2    | chrX  | 55035643/C//T             | nonsynonymous | 0 | 1 |
| DLG3     | chrX  | 69665169/G//A             | nonsynonymous | 0 | 1 |
| GLUD2    | chrX  | 120182192/C//T            | synonymous    | 0 | 1 |
| VGLL1    | chrX  | 135630883/C//T            | nonsynonymous | 0 | 1 |
| MAGEA11  | chrX  | 148794836/G//T            | nonsynonymous | 0 | 1 |
| KCNT2    | chr1  | 196577357/TG//T           | nonsynonymous | 0 | 1 |
| IL1R1    | chr2  | 102791961/G//A            | nonsynonymous | 0 | 1 |
| THSD7B   | chr2  | 138417308/T//C            | nonsynonymous | 0 | 1 |
| CNTN4    | chr3  | 3067878/C//T              | synonymous    | 0 | 1 |
| KLF15    | chr3  | 126062742/C//A            | synonymous    | 0 | 1 |
| GRXCR1   | chr4  | 42965137/G//A             | nonsynonymous | 0 | 1 |
| GAR1     | chr4  | 110743600/G//A            | nonsynonymous | 0 | 1 |
| FREM3    | chr4  | 144621111/C//T            | nonsynonymous | 0 | 1 |
| SLC6A3   | chr5  | 1422122/C//T              | nonsynonymous | 0 | 1 |
| MYO10    | chr5  | 16769229/G//A             | synonymous    | 0 | 1 |
| HSPA4    | chr5  | 132406060/T//C            | synonymous    | 0 | 1 |
| PCDHGA3  | chr5  | 140724411/G//A            | nonsynonymous | 0 | 1 |
| KIF4B    | chr5  | 154394377/C//A            | nonsynonymous | 0 | 1 |
| DBN1     | chr5  | 176885086/G//T            | synonymous    | 0 | 1 |
| HIST1H3I | chr6  | 27839744/C//T             | nonsynonymous | 0 | 1 |
| ESR1     | chr6  | 152129315/G//A            | nonsynonymous | 0 | 1 |
| TRPM6    | chr9  | 77377786/G//A             | synonymous    | 0 | 1 |
| BRD3     | chr9  | 136916791/T//G            | nonsynonymous | 0 | 1 |
| GLT6D1   | chr9  | 138516030/G//A            | synonymous    | 0 | 1 |
| KIF5B    | chr10 | 32310022/GTTTCTCTATGGCTCT | nonsynonymous | 0 | 1 |
| VSTM4    | chr10 | 50227728/G//A             | synonymous    | 0 | 1 |
| LBX1     | chr10 | 102987483/C//T            | synonymous    | 0 | 1 |
| VWA5A    | chr11 | 123994075/A//T            | nonsynonymous | 0 | 1 |
|          | chr12 | 25055951/G//C             | synonymous    | 0 | 1 |
| GCN1     | chr12 | 120591162/G//A            | nonsynonymous | 0 | 1 |
| B3GLCT   | chr13 | 31848665/A//G             | nonsynonymous | 0 | 1 |
| RNF219   | chr13 | 79233264/T//G             | synonymous    | 0 | 1 |
| RTL1     | chr14 | 101347435/C//T            | nonsynonymous | 0 | 1 |
| MYO5A    | chr15 | 52615641/T//C             | nonsynonymous | 0 | 1 |
| ST8SIA2  | chr15 | 92987949/A//G             | nonsynonymous | 0 | 1 |
| CDH5     | chr16 | 66436878/G//A             | nonsynonymous | 0 | 1 |



|           |       |                        |               |   |   |
|-----------|-------|------------------------|---------------|---|---|
| ZNF469    | chr16 | 88503808/C//T          | synonymous    | 0 | 1 |
| KANSL1    | chr17 | 44109636/G//T          | nonsynonymous | 0 | 1 |
| B3GNTL1   | chr17 | 80923600/G//A          | nonsynonymous | 0 | 1 |
| HDGFRP2   | chr19 | 4499538/C//G           | synonymous    | 0 | 1 |
| ZNF441    | chr19 | 11892490/C//T          | synonymous    | 0 | 1 |
| CACNA1A   | chr19 | 13394205/C//A          | nonsynonymous | 0 | 1 |
| ZNF583    | chr19 | 56918467/C//A          | synonymous    | 0 | 1 |
| NFS1      | chr20 | 34268698/G//T          | nonsynonymous | 0 | 1 |
| TMPRSS15  | chr21 | 19666606/C//T          | nonsynonymous | 0 | 1 |
| CLDN17    | chr21 | 31538697/G//A          | nonsynonymous | 0 | 1 |
| PDPN      | chr1  | 13910449/G//T          | nonsynonymous | 0 | 1 |
| NPL       | chr1  | 182783998/G//A         | synonymous    | 0 | 1 |
| DHX57     | chr2  | 39095403/C//T          | nonsynonymous | 0 | 1 |
| LRRTM4    | chr2  | 77746472/T//C          | nonsynonymous | 0 | 1 |
| BIN1      | chr2  | 127811516/T//C         | nonsynonymous | 0 | 1 |
| ATR       | chr3  | 142274794/A//G         | nonsynonymous | 0 | 1 |
| UNC5C     | chr4  | 96127865/C//T          | nonsynonymous | 0 | 1 |
| ASIC5     | chr4  | 156775280/G//T         | nonsynonymous | 0 | 1 |
| ZNF862    | chr7  | 149545271/G//T         | nonsynonymous | 0 | 1 |
| LETM2     | chr8  | 38257906/G//GCT        | nonsynonymous | 0 | 1 |
| RGS22     | chr8  | 101118166/G//A         | synonymous    | 0 | 1 |
| OR13C9    | chr9  | 107379770/G//A         | nonsynonymous | 0 | 1 |
| MASTL     | chr10 | 27454024/A//G          | synonymous    | 0 | 1 |
| EHBP1L1   | chr11 | 65352963/C//T          | synonymous    | 0 | 1 |
| HECTD4    | chr12 | 112631430/T//C         | nonsynonymous | 0 | 1 |
| SNTB2     | chr16 | 69221110/C//T          | nonsynonymous | 0 | 1 |
| SEH1L     | chr18 | 12984136/A//G          | synonymous    | 0 | 1 |
| CD22      | chr19 | 35827128/G//A          | nonsynonymous | 0 | 1 |
| ZNF814    | chr19 | 58385037/C//A          | nonsynonymous | 0 | 1 |
| DYNLRB1   | chr20 | 33104272/C//T          | synonymous    | 0 | 1 |
| USP26     | chrX  | 132161709/C//T         | synonymous    | 0 | 1 |
| TMEM240   | chr1  | 1470870/G//A           | synonymous    | 0 | 1 |
| HIVEP3    | chr1  | 42048811/G//T          | nonsynonymous | 0 | 1 |
| AK5       | chr1  | 77752748/C//G          | nonsynonymous | 0 | 1 |
| FCER1A    | chr1  | 159277538/C//T         | nonsynonymous | 0 | 1 |
| EDAR      | chr2  | 109526924/G//T         | synonymous    | 0 | 1 |
| COL3A1    | chr2  | 189869012/G//A         | synonymous    | 0 | 1 |
| CADPS     | chr3  | 62739267/C//T          | nonsynonymous | 0 | 1 |
| FAT1      | chr4  | 187509932/G//A         | synonymous    | 0 | 1 |
| GABRP     | chr5  | 170239043/T//C         | synonymous    | 0 | 1 |
| HIST1H2BC | chr6  | 26124106/G//A          | synonymous    | 0 | 1 |
| TDRD6     | chr6  | 46655880/C//T          | synonymous    | 0 | 1 |
| PEG10     | chr7  | 94294093/C//T          | nonsynonymous | 0 | 1 |
| CLCN1     | chr7  | 143016929/G//A         | nonsynonymous | 0 | 1 |
| CA2       | chr8  | 86376278/G//T          | synonymous    | 0 | 1 |
| ADAMTS14  | chr10 | 72511262/G//A          | nonsynonymous | 0 | 1 |
| ATRNL1    | chr10 | 117001471/C//T         | synonymous    | 0 | 1 |
| PYROXD1   | chr12 | 21621501/G//C          | nonsynonymous | 0 | 1 |
|           | chr12 | 71029740/C//G          | synonymous    | 0 | 1 |
| PHLDA1    | chr12 | 76424958/T//C          | synonymous    | 0 | 1 |
| TRPM1     | chr15 | 31319165/C//A          | nonsynonymous | 0 | 1 |
| RGMA      | chr15 | 93588632/G//A          | nonsynonymous | 0 | 1 |
| PPL       | chr16 | 4943378/A//G           | synonymous    | 0 | 1 |
| KCTD19    | chr16 | 67325614/A//ATGCTG     | nonsynonymous | 0 | 1 |
| FOXC2     | chr16 | 86600950/G//A          | synonymous    | 0 | 1 |
| ZFP3      | chr17 | 4996100/C//T           | nonsynonymous | 0 | 1 |
|           | chr17 | 61957928/C//T          | synonymous    | 0 | 1 |
| CARD14    | chr17 | 78163644/C//T          | synonymous    | 0 | 1 |
| DOT1L     | chr19 | 2226917/G//T           | nonsynonymous | 0 | 1 |
| LONP1     | chr19 | 5707830/C//T           | nonsynonymous | 0 | 1 |
| RAVER1    | chr19 | 10439448/T//C          | nonsynonymous | 0 | 1 |
| VN1R4     | chr19 | 53770752/GCTAAGAAGT//G | nonsynonymous | 0 | 1 |
| HAO1      | chr20 | 7894894/G//A           | synonymous    | 0 | 1 |
| SPON2     | chr4  | 1161296/T//C           | synonymous    | 0 | 1 |
| SLC34A2   | chr4  | 25675931/C//G          | synonymous    | 0 | 1 |
| PDZD2     | chr5  | 32048710/C//T          | nonsynonymous | 0 | 1 |
| GSTA3     | chr6  | 52770596/G//A          | nonsynonymous | 0 | 1 |
| SLC30A8   | chr8  | 118147641/A//G         | synonymous    | 0 | 1 |
| FADS2     | chr11 | 61615663/C//G          | nonsynonymous | 0 | 1 |
| RASGRF1   | chr15 | 79288118/A//G          | synonymous    | 0 | 1 |

|              |       |                       |               |   |   |
|--------------|-------|-----------------------|---------------|---|---|
| ACAN         | chr15 | 89398293/C//A         | nonsynonymous | 0 | 1 |
| NTHL1        | chr16 | 2089886/G//T          | synonymous    | 0 | 1 |
| TNFRSF8      | chr1  | 12123670/C//T         | synonymous    | 0 | 1 |
| ATP13A2      | chr1  | 17316423/A//T         | nonsynonymous | 0 | 1 |
| XKR8         | chr1  | 28293119/C//T         | nonsynonymous | 0 | 1 |
| B4GALT2      | chr1  | 44447406/G//A         | nonsynonymous | 0 | 1 |
| ZRANB2       | chr1  | 71538161/A//G         | synonymous    | 0 | 1 |
| BARHL2       | chr1  | 91182581/C//T         | nonsynonymous | 0 | 1 |
| LSG1         | chr3  | 194371867/G//A        | nonsynonymous | 0 | 1 |
| RGS12        | chr4  | 3318662/C//T          | synonymous    | 0 | 1 |
| ATP10D       | chr4  | 47582456/T//C         | synonymous    | 0 | 1 |
| FGA          | chr4  | 155508048/C//T        | nonsynonymous | 0 | 1 |
| C5orf42      | chr5  | 37165697/G//A         | nonsynonymous | 0 | 1 |
| ADGRV1       | chr5  | 89949052/C//A         | nonsynonymous | 0 | 1 |
| TRPC7        | chr5  | 135692974/G//A        | synonymous    | 0 | 1 |
| PCDHA1       | chr5  | 140166685/C//T        | synonymous    | 0 | 1 |
| PCDHGA3      | chr5  | 140725839/C//T        | nonsynonymous | 0 | 1 |
| HIVEP2       | chr6  | 143074917/C//T        | nonsynonymous | 0 | 1 |
| COL1A2       | chr7  | 94045753/G//A         | nonsynonymous | 0 | 1 |
| ZAN          | chr7  | 100373129/C//T        | nonsynonymous | 0 | 1 |
| BRAF         | chr7  | 140453155/C//T        | nonsynonymous | 0 | 1 |
| DENND3       | chr8  | 142146838/C//T        | synonymous    | 0 | 1 |
| CDKN2A       | chr9  | 21974704/C//T         | synonymous    | 0 | 1 |
| DENND1A      | chr9  | 126319867/G//A        | synonymous    | 0 | 1 |
| PLPP7        | chr9  | 134183364/G//A        | nonsynonymous | 0 | 1 |
| HMX2         | chr10 | 124907975/C//T        | synonymous    | 0 | 1 |
| RBMXL2       | chr11 | 7111385/G//A          | nonsynonymous | 0 | 1 |
| PLEKHA7      | chr11 | 16812744/T//A         | nonsynonymous | 0 | 1 |
| FKBP2        | chr11 | 64011440/G//GC        | nonsynonymous | 0 | 1 |
| FOSL1        | chr11 | 65660577/A//G         | nonsynonymous | 0 | 1 |
| TPCN2        | chr11 | 68822681/C//T         | nonsynonymous | 0 | 1 |
| GRM5         | chr11 | 88780735/C//T         | synonymous    | 0 | 1 |
| HEBP1        | chr12 | 13128357/C//T         | nonsynonymous | 0 | 1 |
| KIAA1551     | chr12 | 32136552/ATACAT//A    | nonsynonymous | 0 | 1 |
| OR6C6        | chr12 | 55688832/C//T         | nonsynonymous | 0 | 1 |
| UHRF1BP1L    | chr12 | 100453754/T//C        | synonymous    | 0 | 1 |
| GPR180       | chr13 | 95273389/G//A         | nonsynonymous | 0 | 1 |
| CHD8         | chr14 | 21871794/G//A         | synonymous    | 0 | 1 |
| MYH6         | chr14 | 23869561/G//A         | synonymous    | 0 | 1 |
| SIX4         | chr14 | 61180093/G//T         | synonymous    | 0 | 1 |
| TP53BP1      | chr15 | 43783907/G//A         | nonsynonymous | 0 | 1 |
| FBN1         | chr15 | 48760714/C//A         | nonsynonymous | 0 | 1 |
| DLG4         | chr17 | 7100227/G//A          | nonsynonymous | 0 | 1 |
| TBCD         | chr17 | 80890597/C//T         | synonymous    | 0 | 1 |
| PSMA8        | chr18 | 23713864/C//T         | synonymous    | 0 | 1 |
| CDH2         | chr18 | 25589803/G//A         | nonsynonymous | 0 | 1 |
| SMAD4        | chr18 | 48575111/C//T         | nonsynonymous | 0 | 1 |
| MAP2K2       | chr19 | 4101129/G//A          | nonsynonymous | 0 | 1 |
| MUC16        | chr19 | 9089079/A//G          | synonymous    | 0 | 1 |
| C19orf73     | chr19 | 49622133/G//A         | synonymous    | 0 | 1 |
| AKT1S1       | chr19 | 50373052/G//C         | synonymous    | 0 | 1 |
| ZSCAN18      | chr19 | 58596036/G//A         | synonymous    | 0 | 1 |
| TGM6         | chr20 | 2375142/G//A          | nonsynonymous | 0 | 1 |
| KIAA1755     | chr20 | 36888951/G//A         | synonymous    | 0 | 1 |
| COL18A1      | chr21 | 46925297/C//CCCCCTGGG | nonsynonymous | 0 | 1 |
| SMG5         | chr1  | 156237325/C//T        | synonymous    | 0 | 1 |
| LOC100506422 | chr9  | 26114453/C//A         | nonsynonymous | 0 | 1 |
| STX2         | chr12 | 131283110/T//C        | nonsynonymous | 0 | 1 |
| RBPMS2       | chr15 | 65041626/T//C         | synonymous    | 0 | 1 |
| WDR93        | chr15 | 90276385/C//T         | synonymous    | 0 | 1 |
| PARD6G       | chr18 | 77960643/T//C         | nonsynonymous | 0 | 1 |
| KIAA1755     | chr20 | 36842060/C//A         | nonsynonymous | 0 | 1 |
| MYBL2        | chr20 | 42311444/A//G         | nonsynonymous | 0 | 1 |
| MMP11        | chr22 | 24124432/C//T         | synonymous    | 0 | 1 |
| CCDC134      | chr22 | 42209333/G//A         | nonsynonymous | 0 | 1 |
| ARHGEF16     | chr1  | 3391282/T//C          | nonsynonymous | 0 | 1 |
| PADI6        | chr1  | 17698711/CTGAG//C     | synonymous    | 0 | 1 |
| C1QB         | chr1  | 22985947/A//C         | synonymous    | 0 | 1 |
| MATN1        | chr1  | 31194277/C//T         | nonsynonymous | 0 | 1 |
| AGO3         | chr1  | 36439119/G//A         | synonymous    | 0 | 1 |

|          |       |                 |               |   |   |
|----------|-------|-----------------|---------------|---|---|
| BEND5    | chr1  | 49208391/C//T   | synonymous    | 0 | 1 |
| ZFYVE9   | chr1  | 52704746/C//G   | nonsynonymous | 0 | 1 |
| MOV10    | chr1  | 113237176/G//A  | nonsynonymous | 0 | 1 |
| PGLYRP3  | chr1  | 153276376/T//G  | nonsynonymous | 0 | 1 |
| DNAH14   | chr1  | 225445715/A//C  | nonsynonymous | 0 | 1 |
| WDR64    | chr1  | 241901777/G//A  | nonsynonymous | 0 | 1 |
| OR2G6    | chr1  | 248685240/T//TG | nonsynonymous | 0 | 1 |
| EFR3B    | chr2  | 25360300/G//T   | nonsynonymous | 0 | 1 |
| EPAS1    | chr2  | 46609689/G//A   | nonsynonymous | 0 | 1 |
| MTIF2    | chr2  | 55490777/T//C   | nonsynonymous | 0 | 1 |
| RNF149   | chr2  | 101911602/C//A  | nonsynonymous | 0 | 1 |
| NEB      | chr2  | 152500425/G//A  | synonymous    | 0 | 1 |
| SCN3A    | chr2  | 165994536/T//G  | nonsynonymous | 0 | 1 |
| TFFI     | chr2  | 188332626/G//T  | nonsynonymous | 0 | 1 |
| OR5H2    | chr3  | 98002256/T//C   | synonymous    | 0 | 1 |
| DPPA2    | chr3  | 109023487/A//C  | nonsynonymous | 0 | 1 |
| IGSF11   | chr3  | 118621651/A//C  | nonsynonymous | 0 | 1 |
| STIM2    | chr4  | 27024514/A//C   | nonsynonymous | 0 | 1 |
| CHRNA9   | chr4  | 40337843/G//A   | nonsynonymous | 0 | 1 |
| TRPC3    | chr4  | 122853894/C//T  | synonymous    | 0 | 1 |
| OTUD4    | chr4  | 146071818/T//C  | nonsynonymous | 0 | 1 |
| CDH10    | chr5  | 24498507/C//T   | synonymous    | 0 | 1 |
| MCIDAS   | chr5  | 54518198/C//G   | nonsynonymous | 0 | 1 |
| DDX4     | chr5  | 55083757/G//A   | synonymous    | 0 | 1 |
| MCC      | chr5  | 112363068/C//A  | nonsynonymous | 0 | 1 |
| GMNN     | chr6  | 24781720/T//C   | nonsynonymous | 0 | 1 |
| TRIM15   | chr6  | 30140162/C//T   | synonymous    | 0 | 1 |
| DST      | chr6  | 56399921/T//A   | nonsynonymous | 0 | 1 |
| ETV1     | chr7  | 13975345/G//T   | nonsynonymous | 0 | 1 |
| CACNA2D1 | chr7  | 81589082/C//A   | synonymous    | 0 | 1 |
| PCLO     | chr7  | 82586203/T//C   | nonsynonymous | 0 | 1 |
| ANKIB1   | chr7  | 92015955/G//C   | nonsynonymous | 0 | 1 |
| C7orf76  | chr7  | 96114171/A//C   | synonymous    | 0 | 1 |
| TAS2R39  | chr7  | 142881457/C//T  | nonsynonymous | 0 | 1 |
| ASAH1    | chr8  | 17933073/T//G   | synonymous    | 0 | 1 |
| EIF4EBP1 | chr8  | 37888171/T//C   | nonsynonymous | 0 | 1 |
| HTRA4    | chr8  | 38832175/C//T   | synonymous    | 0 | 1 |
| TXN      | chr9  | 113018803/C//T  | synonymous    | 0 | 1 |
| CDK5RAP2 | chr9  | 123234136/T//G  | nonsynonymous | 0 | 1 |
| COL5A1   | chr9  | 137696825/A//C  | nonsynonymous | 0 | 1 |
| COL5A1   | chr9  | 137696830/G//T  | nonsynonymous | 0 | 1 |
| DHTKD1   | chr10 | 12143179/A//G   | nonsynonymous | 0 | 1 |
| PSAP     | chr10 | 73594216/C//T   | synonymous    | 0 | 1 |
| ZNF503   | chr10 | 77159396/G//A   | nonsynonymous | 0 | 1 |
| APBB1    | chr11 | 6416829/G//A    | nonsynonymous | 0 | 1 |
| ILK      | chr11 | 6631688/C//T    | synonymous    | 0 | 1 |
| BAD      | chr11 | 64039154/G//C   | nonsynonymous | 0 | 1 |
| GRK2     | chr11 | 67052440/G//A   | nonsynonymous | 0 | 1 |
| GPR152   | chr11 | 67219675/A//G   | nonsynonymous | 0 | 1 |
| ARHGEF17 | chr11 | 73067305/G//A   | nonsynonymous | 0 | 1 |
| ARHGEF17 | chr11 | 73074283/G//A   | nonsynonymous | 0 | 1 |
| GXYLT1   | chr12 | 42512884/T//G   | nonsynonymous | 0 | 1 |
| SCAF11   | chr12 | 46321385/G//T   | nonsynonymous | 0 | 1 |
| OR6C65   | chr12 | 55795059/T//C   | synonymous    | 0 | 1 |
| OTOGL    | chr12 | 80729744/C//A   | nonsynonymous | 0 | 1 |
| PPFIA2   | chr12 | 81675103/T//A   | nonsynonymous | 0 | 1 |
| NR1H4    | chr12 | 100934553/G//A  | synonymous    | 0 | 1 |
| VWA8     | chr13 | 42164866/T//G   | nonsynonymous | 0 | 1 |
| FOXG1    | chr14 | 29237700/C//T   | synonymous    | 0 | 1 |
| DNAAF2   | chr14 | 50100943/G//A   | nonsynonymous | 0 | 1 |
| TJP1     | chr15 | 30053866/G//A   | nonsynonymous | 0 | 1 |
| EMC7     | chr15 | 34388111/G//A   | nonsynonymous | 0 | 1 |
| FBN1     | chr15 | 48780370/A//G   | nonsynonymous | 0 | 1 |
| UNC13C   | chr15 | 54838938/A//C   | nonsynonymous | 0 | 1 |
| TCF25    | chr16 | 89962463/C//T   | nonsynonymous | 0 | 1 |
| AIPL1    | chr17 | 6338325/T//C    | synonymous    | 0 | 1 |
| TBX21    | chr17 | 45821620/C//T   | synonymous    | 0 | 1 |
| PDK2     | chr17 | 48172699/G//A   | synonymous    | 0 | 1 |
| SDK2     | chr17 | 71364645/A//C   | nonsynonymous | 0 | 1 |
| NPLOC4   | chr17 | 79534502/T//C   | nonsynonymous | 0 | 1 |

|           |       |                        |               |   |   |
|-----------|-------|------------------------|---------------|---|---|
| ARHGDI A  | chr17 | 79827691/T//C          | nonsynonymous | 0 | 1 |
| SIRT7     | chr17 | 79870317/C//T          | nonsynonymous | 0 | 1 |
| ZBTB7C    | chr18 | 45567343/G//A          | nonsynonymous | 0 | 1 |
| ACTL9     | chr19 | 8808608/G//T           | nonsynonymous | 0 | 1 |
| FCGBP     | chr19 | 40424321/C//T          | nonsynonymous | 0 | 1 |
| HAS1      | chr19 | 52216790/C//T          | nonsynonymous | 0 | 1 |
| MAPRE1    | chr20 | 31413783/G//A          | nonsynonymous | 0 | 1 |
| ZHX3      | chr20 | 39831911/C//T          | nonsynonymous | 0 | 1 |
| DDX17     | chr22 | 38902154/T//C          | nonsynonymous | 0 | 1 |
| HFM1      | chr1  | 91859749/A//G          | nonsynonymous | 0 | 1 |
| OR6K3     | chr1  | 158687597/G//C         | nonsynonymous | 0 | 1 |
| ABL2      | chr1  | 179077710/G//A         | nonsynonymous | 0 | 1 |
| CEP170    | chr1  | 243349335/G//A         | nonsynonymous | 0 | 1 |
| SIX3      | chr2  | 45169955/G//T          | nonsynonymous | 0 | 1 |
| PLEK      | chr2  | 68622889/C//G          | nonsynonymous | 0 | 1 |
| RAB11FIP5 | chr2  | 73315611/C//G          | nonsynonymous | 0 | 1 |
| LRP2      | chr2  | 170030522/G//A         | nonsynonymous | 0 | 1 |
| PDZRN3    | chr3  | 73433966/G//A          | nonsynonymous | 0 | 1 |
| CPB1      | chr3  | 148575271/G//C         | nonsynonymous | 0 | 1 |
| USP46     | chr4  | 53468139/G//T          | synonymous    | 0 | 1 |
| TBCK      | chr4  | 107163676/G//A         | nonsynonymous | 0 | 1 |
| ANK2      | chr4  | 114204002/G//T         | nonsynonymous | 0 | 1 |
| WDR17     | chr4  | 177083249/A//C         | nonsynonymous | 0 | 1 |
| COL4A3BP  | chr5  | 74681787/C//T          | nonsynonymous | 0 | 1 |
| PCDHB3    | chr5  | 140482102/A//G         | synonymous    | 0 | 1 |
| SLC22A3   | chr6  | 160828102/C//T         | nonsynonymous | 0 | 1 |
| RADIL     | chr7  | 4839097/C//T           | nonsynonymous | 0 | 1 |
| GLI3      | chr7  | 42085029/G//C          | synonymous    | 0 | 1 |
| POM121L12 | chr7  | 53104248/G//T          | nonsynonymous | 0 | 1 |
| ZNF395    | chr8  | 28217164/C//T          | nonsynonymous | 0 | 1 |
| PRKDC     | chr8  | 48686925/G//A          | synonymous    | 0 | 1 |
| ANGPT1    | chr8  | 108276561/G//T         | nonsynonymous | 0 | 1 |
| ITIH2     | chr10 | 7774309/G//A           | synonymous    | 0 | 1 |
| SHOC2     | chr10 | 112769139/T//C         | nonsynonymous | 0 | 1 |
| MUC5B     | chr11 | 1263343/C//T           | synonymous    | 0 | 1 |
| FGF4      | chr11 | 69589552/C//T          | nonsynonymous | 0 | 1 |
| MOGAT2    | chr11 | 75440016/C//T          | nonsynonymous | 0 | 1 |
| PRDM10    | chr11 | 129805108/G//A         | nonsynonymous | 0 | 1 |
| VWF       | chr12 | 6182790/C//A           | nonsynonymous | 0 | 1 |
| KIF21A    | chr12 | 39713822/T//C          | synonymous    | 0 | 1 |
| ZFC3H1    | chr12 | 72017325/C//T          | nonsynonymous | 0 | 1 |
| PAN3      | chr13 | 28750693/C//T          | nonsynonymous | 0 | 1 |
| PAN3      | chr13 | 28751978/AAACTTACGT//A | synonymous    | 0 | 1 |
| GMPR2     | chr14 | 24706336/C//T          | synonymous    | 0 | 1 |
| NID2      | chr14 | 52481893/G//A          | synonymous    | 0 | 1 |
| MYO9A     | chr15 | 72292250/A//G          | nonsynonymous | 0 | 1 |
| C16orf62  | chr16 | 19659098/G//C          | synonymous    | 0 | 1 |
| ABCA6     | chr17 | 67083578/T//C          | synonymous    | 0 | 1 |
| OR7G3     | chr19 | 9236774/G//T           | nonsynonymous | 0 | 1 |
| ZNF93     | chr19 | 20026183/T//TGTA       | nonsynonymous | 0 | 1 |
| NPHS1     | chr19 | 36342383/G//A          | nonsynonymous | 0 | 1 |
| SERTAD1   | chr19 | 40929344/G//A          | nonsynonymous | 0 | 1 |
| ZNF222    | chr19 | 44537136/C//T          | nonsynonymous | 0 | 1 |
| SPATA25   | chr20 | 44515476/G//A          | nonsynonymous | 0 | 1 |
| PRPF6     | chr20 | 62626355/C//G          | synonymous    | 0 | 1 |
| HCFC1     | chrX  | 153219646/G//C         | nonsynonymous | 0 | 1 |
| STIL      | chr1  | 47775999/G//A          | synonymous    | 0 | 1 |
| DYNC1LI1  | chr3  | 32570080/A//G          | synonymous    | 0 | 1 |
| SLC22A1   | chr6  | 160579669/TGCA//T      | synonymous    | 0 | 1 |
| LMTK2     | chr7  | 97820130/TAG//T        | nonsynonymous | 0 | 1 |
| CTSD      | chr11 | 1780768/G//A           | synonymous    | 0 | 1 |
| CTSF      | chr11 | 66333616/G//T          | nonsynonymous | 0 | 1 |
| DDN       | chr12 | 49391534/T//C          | synonymous    | 0 | 1 |
| TOX4      | chr14 | 21966576/A//G          | synonymous    | 0 | 1 |
| MOK       | chr14 | 102698043/C//T         | nonsynonymous | 0 | 1 |
| SERF2     | chr15 | 44084481/A//G          | synonymous    | 0 | 1 |
| KCTD19    | chr16 | 67329255/T//C          | synonymous    | 0 | 1 |
| AKAP8     | chr19 | 15471675/T//C          | nonsynonymous | 0 | 1 |
| ZNF628    | chr19 | 55995074/G//A          | synonymous    | 0 | 1 |
| TNFRSF8   | chr1  | 12198444/G//A          | synonymous    | 0 | 1 |

|          |       |                  |               |   |   |
|----------|-------|------------------|---------------|---|---|
| TCTEX1D4 | chr1  | 45271804/G//A    | synonymous    | 0 | 1 |
| PTCH2    | chr1  | 45307587/A//T    | nonsynonymous | 0 | 1 |
| RABGGTB  | chr1  | 76257955/A//G    | synonymous    | 0 | 1 |
| BARHL2   | chr1  | 91177957/C//T    | nonsynonymous | 0 | 1 |
| TCHHL1   | chr1  | 152058065/T//C   | nonsynonymous | 0 | 1 |
| SPTA1    | chr1  | 158606546/T//G   | nonsynonymous | 0 | 1 |
| PDC      | chr1  | 186418587/T//C   | nonsynonymous | 0 | 1 |
| BRINP3   | chr1  | 190234094/A//T   | synonymous    | 0 | 1 |
| TLR5     | chr1  | 223286055/T//G   | nonsynonymous | 0 | 1 |
| TRIM58   | chr1  | 248020665/C//T   | synonymous    | 0 | 1 |
| NTSR2    | chr2  | 11798827/G//C    | nonsynonymous | 0 | 1 |
| KCNS3    | chr2  | 18113187/C//A    | synonymous    | 0 | 1 |
| WDCP     | chr2  | 24261940/A//G    | nonsynonymous | 0 | 1 |
| THADA    | chr2  | 43814066/C//A    | nonsynonymous | 0 | 1 |
| SLC3A1   | chr2  | 44508577/T//A    | nonsynonymous | 0 | 1 |
| USP34    | chr2  | 61546459/A//C    | nonsynonymous | 0 | 1 |
| LRRTM4   | chr2  | 77746912/G//A    | nonsynonymous | 0 | 1 |
| SLC9A4   | chr2  | 103148983/T//G   | nonsynonymous | 0 | 1 |
| RANBP2   | chr2  | 109383316/G//C   | nonsynonymous | 0 | 1 |
| KIF5C    | chr2  | 149633146/C//T   | synonymous    | 0 | 1 |
| NEB      | chr2  | 152411464/A//T   | nonsynonymous | 0 | 1 |
| TTN      | chr2  | 179410185/G//A   | synonymous    | 0 | 1 |
| NCKAP1   | chr2  | 183829518/A//T   | nonsynonymous | 0 | 1 |
| ALS2CR11 | chr2  | 202410299/G//A   | nonsynonymous | 0 | 1 |
| UGT1A6   | chr2  | 234601704/A//C   | nonsynonymous | 0 | 1 |
| GRM7     | chr3  | 7503394/C//T     | synonymous    | 0 | 1 |
| SLC6A1   | chr3  | 11067472/C//T    | nonsynonymous | 0 | 1 |
| ZNF620   | chr3  | 40557651/A//G    | nonsynonymous | 0 | 1 |
| ERC2     | chr3  | 55733469/ATGG//A | nonsynonymous | 0 | 1 |
| ATG3     | chr3  | 112277257/T//C   | nonsynonymous | 0 | 1 |
| DNAJC13  | chr3  | 132179188/T//G   | nonsynonymous | 0 | 1 |
| GK5      | chr3  | 141944337/G//C   | synonymous    | 0 | 1 |
| XRN1     | chr3  | 142051245/G//A   | synonymous    | 0 | 1 |
| SKIL     | chr3  | 170102401/C//G   | nonsynonymous | 0 | 1 |
| CCDC39   | chr3  | 180359814/A//C   | nonsynonymous | 0 | 1 |
| KNG1     | chr3  | 186445072/C//T   | nonsynonymous | 0 | 1 |
| MXD4     | chr4  | 2254237/G//A     | synonymous    | 0 | 1 |
| HS3ST1   | chr4  | 11400799/G//A    | synonymous    | 0 | 1 |
| KIT      | chr4  | 55604670/G//T    | nonsynonymous | 0 | 1 |
| TENM3    | chr4  | 183696167/T//G   | nonsynonymous | 0 | 1 |
| TENM3    | chr4  | 183714273/C//T   | nonsynonymous | 0 | 1 |
| TLR3     | chr4  | 186998105/T//A   | nonsynonymous | 0 | 1 |
| ADAMTS16 | chr5  | 5306848/G//A     | synonymous    | 0 | 1 |
| APC      | chr5  | 112164616/C//T   | nonsynonymous | 0 | 1 |
| FBN2     | chr5  | 127700425/T//G   | synonymous    | 0 | 1 |
| PCDHB1   | chr5  | 140432841/G//C   | nonsynonymous | 0 | 1 |
| FAM114A2 | chr5  | 153407729/G//C   | nonsynonymous | 0 | 1 |
| DNAH8    | chr6  | 38875805/T//C    | nonsynonymous | 0 | 1 |
| CUL7     | chr6  | 43011180/A//G    | synonymous    | 0 | 1 |
| B3GAT2   | chr6  | 71666052/C//T    | synonymous    | 0 | 1 |
| MED23    | chr6  | 131925373/G//T   | nonsynonymous | 0 | 1 |
| RADIL    | chr7  | 4854917/G//C     | nonsynonymous | 0 | 1 |
| RPA3     | chr7  | 7680060/C//A     | synonymous    | 0 | 1 |
| TYW1B    | chr7  | 72297499/T//C    | nonsynonymous | 0 | 1 |
| PPP1R9A  | chr7  | 94881071/A//C    | synonymous    | 0 | 1 |
| CNOT4    | chr7  | 135098235/A//G   | nonsynonymous | 0 | 1 |
|          | chr8  | 22452063/G//A    | synonymous    | 0 | 1 |
| C8orf86  | chr8  | 38370144/C//A    | nonsynonymous | 0 | 1 |
| PSMB7    | chr9  | 127177648/G//A   | synonymous    | 0 | 1 |
| CFAP157  | chr9  | 130472970/A//G   | nonsynonymous | 0 | 1 |
| BRD3     | chr9  | 136917510/A//C   | nonsynonymous | 0 | 1 |
| CELF2    | chr10 | 11330406/C//A    | nonsynonymous | 0 | 1 |
| FAM171A1 | chr10 | 15255460/G//A    | synonymous    | 0 | 1 |
| FAM35A   | chr10 | 88911893/G//C    | nonsynonymous | 0 | 1 |
| FBXL15   | chr10 | 104180744/C//A   | synonymous    | 0 | 1 |
| LARGE2   | chr11 | 45946136/C//G    | nonsynonymous | 0 | 1 |
| PSMC3    | chr11 | 47447811/A//G    | nonsynonymous | 0 | 1 |
| OR5L2    | chr11 | 55594859/C//A    | synonymous    | 0 | 1 |
| NARS2    | chr11 | 78154724/T//A    | nonsynonymous | 0 | 1 |
| SLC37A4  | chr11 | 118895968/T//C   | nonsynonymous | 0 | 1 |

|           |       |                            |               |   |   |
|-----------|-------|----------------------------|---------------|---|---|
| PDZD3     | chr11 | 119057995/G//A             | nonsynonymous | 0 | 1 |
| GLB1L3    | chr11 | 134151979/C//A             | nonsynonymous | 0 | 1 |
| KDM5A     | chr12 | 427536/A//G                | nonsynonymous | 0 | 1 |
| CPNE8     | chr12 | 39079360/G//A              | synonymous    | 0 | 1 |
| ADAMTS20  | chr12 | 43792989/G//T              | nonsynonymous | 0 | 1 |
| ADAMTS20  | chr12 | 43846451/C//T              | nonsynonymous | 0 | 1 |
| DPY19L2   | chr12 | 64062058/T//G              | nonsynonymous | 0 | 1 |
| P2RX4     | chr12 | 121648064/C//G             | nonsynonymous | 0 | 1 |
| RNASEH2B  | chr13 | 51528104/G//C              | nonsynonymous | 0 | 1 |
| COL4A1    | chr13 | 110959381/G//A             | synonymous    | 0 | 1 |
| TRPM7     | chr15 | 50875363/G//C              | synonymous    | 0 | 1 |
| VPS13C    | chr15 | 62312706/C//G              | nonsynonymous | 0 | 1 |
| IGF1R     | chr15 | 99467760/C//T              | nonsynonymous | 0 | 1 |
| UBN1      | chr16 | 4907995/A//G               | nonsynonymous | 0 | 1 |
| RSL1D1    | chr16 | 11945438/A//C              | synonymous    | 0 | 1 |
| CCP110    | chr16 | 19547474/A//C              | nonsynonymous | 0 | 1 |
| ERN2      | chr16 | 23712363/A//T              | nonsynonymous | 0 | 1 |
| CES5A     | chr16 | 55907864/A//T              | synonymous    | 0 | 1 |
| PFN1      | chr17 | 4849108/C//G               | synonymous    | 0 | 1 |
| CAMTA2    | chr17 | 4885456/C//G               | nonsynonymous | 0 | 1 |
| EPN2      | chr17 | 19213264/T//C              | nonsynonymous | 0 | 1 |
| TMUB2     | chr17 | 42266646/G//A              | nonsynonymous | 0 | 1 |
| ELOA2     | chr18 | 44560055/C//T              | synonymous    | 0 | 1 |
| SH3GL1    | chr19 | 4366968/C//A               | synonymous    | 0 | 1 |
| MUC16     | chr19 | 9024136/G//C               | nonsynonymous | 0 | 1 |
| CACNA1A   | chr19 | 13356068/G//A              | synonymous    | 0 | 1 |
|           | chr19 | 16186935/A//G              | synonymous    | 0 | 1 |
| NWD1      | chr19 | 16918642/A//AT             | nonsynonymous | 0 | 1 |
| COMP      | chr19 | 18896844/TGTC//T           | nonsynonymous | 0 | 1 |
| ZNF99     | chr19 | 22941741/G//T              | nonsynonymous | 0 | 1 |
| ZNF30     | chr19 | 35434931/G//C              | nonsynonymous | 0 | 1 |
| MAMSTR    | chr19 | 49217620/C//T              | synonymous    | 0 | 1 |
| ZNF211    | chr19 | 58153424/C//CG             | nonsynonymous | 0 | 1 |
| CBLN4     | chr20 | 54578942/C//A              | nonsynonymous | 0 | 1 |
| LSM14B    | chr20 | 60708464/G//C              | nonsynonymous | 0 | 1 |
| DONSON    | chr21 | 34953757/C//G              | nonsynonymous | 0 | 1 |
| TCF20     | chr22 | 42608342/C//A              | synonymous    | 0 | 1 |
| IL1RAPL2  | chrX  | 104440305/C//G             | nonsynonymous | 0 | 1 |
| COL4A5    | chrX  | 107866060/G//T             | synonymous    | 0 | 1 |
| AKAP14    | chrX  | 119037548/C//T             | nonsynonymous | 0 | 1 |
| TMEM54    | chr1  | 33360926/C//G              | nonsynonymous | 0 | 1 |
| LHCGR     | chr2  | 48958379/C//A              | nonsynonymous | 0 | 1 |
| PTPN23    | chr3  | 47448038/G//A              | nonsynonymous | 0 | 1 |
| CELSR3    | chr3  | 48692616/C//T              | nonsynonymous | 0 | 1 |
| FOXL2     | chr3  | 138665037/G//T             | nonsynonymous | 0 | 1 |
| SLC10A4   | chr4  | 48485815/C//T              | synonymous    | 0 | 1 |
| SV2C      | chr5  | 75427755/G//A              | synonymous    | 0 | 1 |
| SLC22A5   | chr5  | 131719864/G//A             | nonsynonymous | 0 | 1 |
| KLC4      | chr6  | 43039994/G//A              | nonsynonymous | 0 | 1 |
| EYS       | chr6  | 66115069/T//G              | nonsynonymous | 0 | 1 |
| SYNE1     | chr6  | 152728226/A//AGTT          | nonsynonymous | 0 | 1 |
| DENND2A   | chr7  | 140301437/G//A             | nonsynonymous | 0 | 1 |
| TNFRSF10C | chr8  | 22972207/G//A              | synonymous    | 0 | 1 |
| NEFM      | chr8  | 24773231/C//T              | synonymous    | 0 | 1 |
| ARFGEF1   | chr8  | 68204316/G//A              | nonsynonymous | 0 | 1 |
| TOPORS    | chr9  | 32544029/G//A              | nonsynonymous | 0 | 1 |
| TRIM14    | chr9  | 100850295/G//A             | synonymous    | 0 | 1 |
| ABCA2     | chr9  | 139912149/G//A             | synonymous    | 0 | 1 |
| C10orf71  | chr10 | 50534757/C//T              | synonymous    | 0 | 1 |
| GBF1      | chr10 | 104128002/G//A             | synonymous    | 0 | 1 |
| CPNE8     | chr12 | 39047733/G//A              | nonsynonymous | 0 | 1 |
| PLEKHH1   | chr14 | 68042573/C//CG             | nonsynonymous | 0 | 1 |
| RBBP6     | chr16 | 24580635/T//A              | nonsynonymous | 0 | 1 |
| CHST6     | chr16 | 75513510/C//T              | nonsynonymous | 0 | 1 |
| KCNAB3    | chr17 | 7826455/C//T               | nonsynonymous | 0 | 1 |
| ZNF521    | chr18 | 22805922/T//C              | nonsynonymous | 0 | 1 |
| AP3D1     | chr19 | 2102191/GCCTTCATCTCTCTAA   | nonsynonymous | 0 | 1 |
| SCAF1     | chr19 | 50154898/C//T              | nonsynonymous | 0 | 1 |
| AURKC     | chr19 | 57743436/G//A              | nonsynonymous | 0 | 1 |
| DYRK1A    | chr21 | 38858806/TTGCCATTAAATAA//T | nonsynonymous | 0 | 1 |

|                |      |                           |               |   |   |
|----------------|------|---------------------------|---------------|---|---|
| FTHL17         | chrX | 31089453/C//G             | synonymous    | 0 | 1 |
| EFHC2          | chrX | 44202815/G//A             | nonsynonymous | 0 | 1 |
| AKAP4          | chrX | 49958993/C//A             | nonsynonymous | 0 | 1 |
| PABPC5         | chrX | 90691465/A//G             | nonsynonymous | 0 | 1 |
| PCDH19         | chrX | 99661761/C//T             | nonsynonymous | 0 | 1 |
| ZMAT1          | chrX | 101138612/C//T            | nonsynonymous | 0 | 1 |
| ARMCX5-GPRASP2 | chrX | 101971493/G//A            | nonsynonymous | 0 | 1 |
| SLC10A3        | chrX | 153717021/C//T            | nonsynonymous | 0 | 1 |
| SAMD11         | chr1 | 877582/T//C               | synonymous    | 1 | 0 |
| TAS1R3         | chr1 | 1267428/C//A              | nonsynonymous | 1 | 0 |
| PEX10          | chr1 | 2337144/A//C              | synonymous    | 1 | 0 |
| CHD5           | chr1 | 6214827/A//G              | nonsynonymous | 1 | 0 |
| MASP2          | chr1 | 11087239/G//A             | synonymous    | 1 | 0 |
| MTHFR          | chr1 | 11852427/CTAAG//C         | nonsynonymous | 1 | 0 |
| TNFRSF8        | chr1 | 12123678/T//G             | nonsynonymous | 1 | 0 |
| PRAMEF12       | chr1 | 12835929/C//T             | synonymous    | 1 | 0 |
| IFFO2          | chr1 | 19235151/C//T             | synonymous    | 1 | 0 |
| ARID1A         | chr1 | 27089634/G//T             | nonsynonymous | 1 | 0 |
| NR0B2          | chr1 | 27240121/G//T             | nonsynonymous | 1 | 0 |
| SYTL1          | chr1 | 27680354/CCT//C           | synonymous    | 1 | 0 |
| MAP3K6         | chr1 | 27682935/G//T             | nonsynonymous | 1 | 0 |
| MARCKSL1       | chr1 | 32800513/TTTC//T          | nonsynonymous | 1 | 0 |
| BSDC1          | chr1 | 32852373/T//C             | synonymous    | 1 | 0 |
| RNF19B         | chr1 | 33404103/T//C             | nonsynonymous | 1 | 0 |
| SCMH1          | chr1 | 41625463/CAGA//C          | synonymous    | 1 | 0 |
| PTCH2          | chr1 | 45291982/G//A             | synonymous    | 1 | 0 |
| POMGNT1        | chr1 | 46657828/T//C             | nonsynonymous | 1 | 0 |
| ZYG11B         | chr1 | 53262047/C//G             | nonsynonymous | 1 | 0 |
| JAK1           | chr1 | 65325832/C//T             | synonymous    | 1 | 0 |
| SYDE2          | chr1 | 85648595/G//A             | nonsynonymous | 1 | 0 |
| GBP4           | chr1 | 89654412/G//A             | synonymous    | 1 | 0 |
| ZNF644         | chr1 | 91403277/A//G             | synonymous    | 1 | 0 |
| HFM1           | chr1 | 91859664/T//C             | synonymous    | 1 | 0 |
| FAM69A         | chr1 | 93309641/C//T             | nonsynonymous | 1 | 0 |
| GNAT2          | chr1 | 110145946/A//G            | synonymous    | 1 | 0 |
| RBM15          | chr1 | 110883879/C//T            | nonsynonymous | 1 | 0 |
| CD101          | chr1 | 117568206/G//T            | nonsynonymous | 1 | 0 |
| ITGA10         | chr1 | 145536090/C//T            | nonsynonymous | 1 | 0 |
| RPRD2          | chr1 | 150418882/G//A            | synonymous    | 1 | 0 |
| RPRD2          | chr1 | 150445572/A//G            | nonsynonymous | 1 | 0 |
| SETDB1         | chr1 | 150921688/C//A            | nonsynonymous | 1 | 0 |
| FLG            | chr1 | 152277610/G//C            | nonsynonymous | 1 | 0 |
| FLG            | chr1 | 152278660/G//A            | nonsynonymous | 1 | 0 |
| SPRR2F         | chr1 | 153084926/G//A            | synonymous    | 1 | 0 |
| INTS3          | chr1 | 153740222/C//A            | synonymous    | 1 | 0 |
| DCST1          | chr1 | 155020368/G//A            | nonsynonymous | 1 | 0 |
| GON4L          | chr1 | 155735240/G//A            | nonsynonymous | 1 | 0 |
| ARHGEF11       | chr1 | 156928583/G//A            | nonsynonymous | 1 | 0 |
| OR6K2          | chr1 | 158669865/G//A            | nonsynonymous | 1 | 0 |
| CFAP45         | chr1 | 159846426/C//T            | synonymous    | 1 | 0 |
| NCSTN          | chr1 | 160326056/C//T            | nonsynonymous | 1 | 0 |
| CACNA1E        | chr1 | 181453037/T//C            | nonsynonymous | 1 | 0 |
| PLA2G4A        | chr1 | 186823437/G//A            | synonymous    | 1 | 0 |
| KIF21B         | chr1 | 200977992/C//T            | nonsynonymous | 1 | 0 |
| LAD1           | chr1 | 201355836/ATCTTCTCTGATAGA | nonsynonymous | 1 | 0 |
| IPO9           | chr1 | 201823730/C//A            | nonsynonymous | 1 | 0 |
| PM20D1         | chr1 | 205814517/G//C            | nonsynonymous | 1 | 0 |
| ITPKB          | chr1 | 226822530/T//C            | nonsynonymous | 1 | 0 |
| URB2           | chr1 | 229783467/G//A            | nonsynonymous | 1 | 0 |
| KIF26B         | chr1 | 245704144/G//A            | synonymous    | 1 | 0 |
| RSAD2          | chr2 | 7018057/A//G              | synonymous    | 1 | 0 |
| APOB           | chr2 | 21230763/C//T             | nonsynonymous | 1 | 0 |
| MFSD2B         | chr2 | 24246521/T//C             | nonsynonymous | 1 | 0 |
| WDCP           | chr2 | 24253859/C//A             | nonsynonymous | 1 | 0 |
| DTNB           | chr2 | 25655840/G//A             | nonsynonymous | 1 | 0 |
| SELENOI        | chr2 | 26569067/C//T             | synonymous    | 1 | 0 |
| ALK            | chr2 | 29551312/A//C             | nonsynonymous | 1 | 0 |
| HEATR5B        | chr2 | 37297405/C//T             | nonsynonymous | 1 | 0 |
| PREPL          | chr2 | 44571084/T//A             | nonsynonymous | 1 | 0 |
| SRBD1          | chr2 | 45616595/T//C             | nonsynonymous | 1 | 0 |

|         |      |                      |               |   |   |
|---------|------|----------------------|---------------|---|---|
| EML6    | chr2 | 55054778/C//A        | nonsynonymous | 1 | 0 |
| PAPOLG  | chr2 | 61021263/A//G        | synonymous    | 1 | 0 |
| DYSF    | chr2 | 71816731/G//A        | synonymous    | 1 | 0 |
| SFXN5   | chr2 | 73198726/C//A        | synonymous    | 1 | 0 |
| NAT8B   | chr2 | 73928012/G//A        | nonsynonymous | 1 | 0 |
| HK2     | chr2 | 75100475/C//T        | nonsynonymous | 1 | 0 |
| USP39   | chr2 | 85843295/T//C        | synonymous    | 1 | 0 |
| POLR1A  | chr2 | 86267636/G//A        | nonsynonymous | 1 | 0 |
| ARID5A  | chr2 | 97213172/C//T        | nonsynonymous | 1 | 0 |
| SULT1C3 | chr2 | 108869815/C//T       | nonsynonymous | 1 | 0 |
| SH3RF3  | chr2 | 110259146/C//T       | synonymous    | 1 | 0 |
| WDR33   | chr2 | 128464133/CAA//C     | synonymous    | 1 | 0 |
| HS6ST1  | chr2 | 129025784/G//A       | synonymous    | 1 | 0 |
| PTPN18  | chr2 | 131129928/AGACGGG//A | nonsynonymous | 1 | 0 |
| KIF5C   | chr2 | 149633153/C//A       | synonymous    | 1 | 0 |
| XIRP2   | chr2 | 168101882/G//A       | nonsynonymous | 1 | 0 |
| DLX2    | chr2 | 172967139/C//T       | nonsynonymous | 1 | 0 |
| RAPGEF4 | chr2 | 173855540/C//T       | synonymous    | 1 | 0 |
| TTN     | chr2 | 179413088/G//A       | nonsynonymous | 1 | 0 |
| TTN     | chr2 | 179594431/G//A       | synonymous    | 1 | 0 |
| INPP1   | chr2 | 191236199/G//T       | synonymous    | 1 | 0 |
| IDH1    | chr2 | 209104603/C//T       | synonymous    | 1 | 0 |
| ANKZF1  | chr2 | 220095103/C//T       | nonsynonymous | 1 | 0 |
| OBSL1   | chr2 | 220419233/C//T       | synonymous    | 1 | 0 |
| DGKD    | chr2 | 234375849/G//T       | nonsynonymous | 1 | 0 |
| UGT1A10 | chr2 | 234545231/C//T       | synonymous    | 1 | 0 |
| TRPM8   | chr2 | 234891703/G//A       | nonsynonymous | 1 | 0 |
| COL6A3  | chr2 | 238285505/G//T       | nonsynonymous | 1 | 0 |
| OTOS    | chr2 | 241078556/C//T       | synonymous    | 1 | 0 |
| RNPEPL1 | chr2 | 241516033/G//A       | nonsynonymous | 1 | 0 |
| CAPN10  | chr2 | 241531391/C//T       | nonsynonymous | 1 | 0 |
| RTP5    | chr2 | 242815165/C//T       | synonymous    | 1 | 0 |
| SLC6A11 | chr3 | 10980080/C//T        | nonsynonymous | 1 | 0 |
| TMEM40  | chr3 | 12777099/C//T        | nonsynonymous | 1 | 0 |
| MLH1    | chr3 | 37083821/C//A        | nonsynonymous | 1 | 0 |
| SCN5A   | chr3 | 38671832/C//T        | nonsynonymous | 1 | 0 |
| NKTR    | chr3 | 42679324/C//T        | nonsynonymous | 1 | 0 |
| KLHL40  | chr3 | 42727373/A//G        | nonsynonymous | 1 | 0 |
| TDGF1   | chr3 | 46622674/A//G        | synonymous    | 1 | 0 |
| PLXNB1  | chr3 | 48448281/AGTCT//A    | nonsynonymous | 1 | 0 |
| BSN     | chr3 | 49701060/A//G        | synonymous    | 1 | 0 |
| IP6K1   | chr3 | 49764641/C//T        | nonsynonymous | 1 | 0 |
| MANF    | chr3 | 51426378/G//A        | nonsynonymous | 1 | 0 |
| FLNB    | chr3 | 58139197/G//A        | nonsynonymous | 1 | 0 |
| MORC1   | chr3 | 108833237/T//A       | nonsynonymous | 1 | 0 |
| POLQ    | chr3 | 121264723/A//G       | nonsynonymous | 1 | 0 |
| SLC12A8 | chr3 | 124826966/C//A       | nonsynonymous | 1 | 0 |
| SLCO2A1 | chr3 | 133667794/C//T       | nonsynonymous | 1 | 0 |
| STAG1   | chr3 | 136057079/T//C       | synonymous    | 1 | 0 |
| RASA2   | chr3 | 141277771/T//C       | nonsynonymous | 1 | 0 |
| CP      | chr3 | 148895693/C//G       | synonymous    | 1 | 0 |
| MED12L  | chr3 | 150876506/A//T       | nonsynonymous | 1 | 0 |
| IGSF10  | chr3 | 151154496/G//A       | nonsynonymous | 1 | 0 |
| LRR31   | chr3 | 169579608/G//C       | synonymous    | 1 | 0 |
| PLD1    | chr3 | 171417613/C//A       | synonymous    | 1 | 0 |
| HRG     | chr3 | 186394973/C//T       | synonymous    | 1 | 0 |
| TMEM44  | chr3 | 194331664/G//A       | nonsynonymous | 1 | 0 |
| XXYL1   | chr3 | 194991774/C//T       | nonsynonymous | 1 | 0 |
| TACC3   | chr4 | 1741737/C//T         | synonymous    | 1 | 0 |
| WFS1    | chr4 | 6302801/A//AT        | nonsynonymous | 1 | 0 |
| MAN2B2  | chr4 | 6590814/C//T         | nonsynonymous | 1 | 0 |
| MAN2B2  | chr4 | 6602378/G//A         | synonymous    | 1 | 0 |
| SH3TC1  | chr4 | 8237257/G//A         | nonsynonymous | 1 | 0 |
| BOD1L1  | chr4 | 13571721/G//A        | nonsynonymous | 1 | 0 |
| BOD1L1  | chr4 | 13605849/A//G        | nonsynonymous | 1 | 0 |
| ADGRA3  | chr4 | 22444461/G//A        | synonymous    | 1 | 0 |
| PCDH7   | chr4 | 30724309/G//A        | nonsynonymous | 1 | 0 |
| SLAIN2  | chr4 | 48424031/C//A        | synonymous    | 1 | 0 |
| USP46   | chr4 | 53494214/C//T        | synonymous    | 1 | 0 |
| OPRPN   | chr4 | 71275630/A//G        | synonymous    | 1 | 0 |



|           |      |                   |               |   |   |
|-----------|------|-------------------|---------------|---|---|
| ENAM      | chr4 | 71508957/C//CA    | nonsynonymous | 1 | 0 |
| USO1      | chr4 | 76711856/C//T     | synonymous    | 1 | 0 |
| DNAJB14   | chr4 | 100822278/G//A    | synonymous    | 1 | 0 |
| EGF       | chr4 | 110909805/G//A    | nonsynonymous | 1 | 0 |
| ANK2      | chr4 | 114276056/A//C    | nonsynonymous | 1 | 0 |
| MAD2L1    | chr4 | 120981302/C//T    | nonsynonymous | 1 | 0 |
| PCDH18    | chr4 | 138452088/C//T    | synonymous    | 1 | 0 |
| RAPGEF2   | chr4 | 160262846/C//T    | nonsynonymous | 1 | 0 |
| WDR17     | chr4 | 177071618/G//T    | nonsynonymous | 1 | 0 |
| SEMA5A    | chr5 | 9136609/C//T      | synonymous    | 1 | 0 |
| FBXL7     | chr5 | 15936744/G//A     | nonsynonymous | 1 | 0 |
| CDH10     | chr5 | 24593511/G//T     | nonsynonymous | 1 | 0 |
| C7        | chr5 | 40962246/C//A     | nonsynonymous | 1 | 0 |
| C6        | chr5 | 41199899/T//C     | nonsynonymous | 1 | 0 |
| TNPO1     | chr5 | 72189299/A//G     | synonymous    | 1 | 0 |
| CMYA5     | chr5 | 79029009/T//C     | nonsynonymous | 1 | 0 |
| ZFYVE16   | chr5 | 79732665/C//T     | nonsynonymous | 1 | 0 |
| VCAN      | chr5 | 82817967/C//T     | nonsynonymous | 1 | 0 |
| CDKL3     | chr5 | 133644333/C//T    | nonsynonymous | 1 | 0 |
| KIF20A    | chr5 | 137515356/C//T    | synonymous    | 1 | 0 |
| SIL1      | chr5 | 138356887/G//A    | nonsynonymous | 1 | 0 |
| ANKHD1    | chr5 | 139906629/GAGA//G | nonsynonymous | 1 | 0 |
| PCDHA10   | chr5 | 140236727/G//A    | nonsynonymous | 1 | 0 |
| PCDHAC1   | chr5 | 140306753/C//A    | synonymous    | 1 | 0 |
| PCDHGA2   | chr5 | 140720014/G//A    | synonymous    | 1 | 0 |
| PCDHGA2   | chr5 | 140720392/G//A    | synonymous    | 1 | 0 |
| PCDHGB1   | chr5 | 140731657/C//T    | synonymous    | 1 | 0 |
| CPEB4     | chr5 | 173317413/T//C    | nonsynonymous | 1 | 0 |
| RACK1     | chr5 | 180670753/G//A    | synonymous    | 1 | 0 |
| ELOVL2    | chr6 | 10990020/C//T     | synonymous    | 1 | 0 |
| HIST1H2BH | chr6 | 26251926/G//C     | nonsynonymous | 1 | 0 |
| PPP1R18   | chr6 | 30647003/A//T     | nonsynonymous | 1 | 0 |
| NRM       | chr6 | 30658638/G//A     | synonymous    | 1 | 0 |
| BAG6      | chr6 | 31617128/G//C     | nonsynonymous | 1 | 0 |
| COL11A2   | chr6 | 33136298/G//A     | nonsynonymous | 1 | 0 |
| CPNE5     | chr6 | 36724068/T//C     | nonsynonymous | 1 | 0 |
| NCR2      | chr6 | 41303603/G//A     | synonymous    | 1 | 0 |
| TRERF1    | chr6 | 42236559/A//T     | nonsynonymous | 1 | 0 |
| TJAP1     | chr6 | 43473227/C//T     | synonymous    | 1 | 0 |
| ADGRF5    | chr6 | 46826342/C//T     | nonsynonymous | 1 | 0 |
| KIAA1586  | chr6 | 56918789/G//A     | nonsynonymous | 1 | 0 |
| EYS       | chr6 | 65707581/G//A     | nonsynonymous | 1 | 0 |
| COL12A1   | chr6 | 75865450/G//A     | nonsynonymous | 1 | 0 |
| COX7A2    | chr6 | 75953513/G//A     | nonsynonymous | 1 | 0 |
| MDN1      | chr6 | 90365627/G//A     | nonsynonymous | 1 | 0 |
| OSTM1     | chr6 | 108395631/C//T    | synonymous    | 1 | 0 |
| TBC1D32   | chr6 | 121481194/T//C    | nonsynonymous | 1 | 0 |
| MED23     | chr6 | 131929203/C//T    | synonymous    | 1 | 0 |
| TAAR2     | chr6 | 132938636/T//C    | nonsynonymous | 1 | 0 |
| KATNA1    | chr6 | 149916344/C//A    | nonsynonymous | 1 | 0 |
| LRP11     | chr6 | 150157367/G//A    | nonsynonymous | 1 | 0 |
| LPA       | chr6 | 161027527/C//G    | nonsynonymous | 1 | 0 |
| RPS6KA2   | chr6 | 166826178/C//T    | synonymous    | 1 | 0 |
| FOXK1     | chr7 | 4801880/C//T      | nonsynonymous | 1 | 0 |
| HDAC9     | chr7 | 18767228/G//A     | nonsynonymous | 1 | 0 |
| DFNA5     | chr7 | 24738636/C//T     | synonymous    | 1 | 0 |
| ELMO1     | chr7 | 37262253/C//T     | synonymous    | 1 | 0 |
| ZMIZ2     | chr7 | 44801090/G//A     | nonsynonymous | 1 | 0 |
| MYO1G     | chr7 | 45016247/C//A     | nonsynonymous | 1 | 0 |
| SEMA3C    | chr7 | 80432078/C//T     | synonymous    | 1 | 0 |
| PCLO      | chr7 | 82582851/A//G     | nonsynonymous | 1 | 0 |
| PCLO      | chr7 | 82764328/A//G     | synonymous    | 1 | 0 |
| CROT      | chr7 | 86978407/C//G     | nonsynonymous | 1 | 0 |
| CDK14     | chr7 | 90585032/G//A     | nonsynonymous | 1 | 0 |
| RBM48     | chr7 | 92166172/C//T     | nonsynonymous | 1 | 0 |
| SAMD9     | chr7 | 92732520/G//C     | nonsynonymous | 1 | 0 |
| ARPC1B    | chr7 | 98987568/G//A     | nonsynonymous | 1 | 0 |
| MUC12     | chr7 | 100638776/AAC//A  | nonsynonymous | 1 | 0 |
| TRIM56    | chr7 | 100731470/G//T    | nonsynonymous | 1 | 0 |
| VGFB      | chr7 | 100806796/G//C    | nonsynonymous | 1 | 0 |

|          |       |                    |               |   |   |
|----------|-------|--------------------|---------------|---|---|
| TES      | chr7  | 115890549/A//G     | nonsynonymous | 1 | 0 |
| CTTNBP2  | chr7  | 117432272/C//T     | nonsynonymous | 1 | 0 |
| LMOD2    | chr7  | 123302169/A//G     | nonsynonymous | 1 | 0 |
| OR9A4    | chr7  | 141619394/C//T     | nonsynonymous | 1 | 0 |
| OR2A14   | chr7  | 143827014/A//G     | nonsynonymous | 1 | 0 |
| ATP6V0E2 | chr7  | 149576809/G//A     | synonymous    | 1 | 0 |
| ATG9B    | chr7  | 150714980/A//G     | nonsynonymous | 1 | 0 |
| CRYGN    | chr7  | 151133308/A//G     | nonsynonymous | 1 | 0 |
| KMT2C    | chr7  | 152012318/GT//G    | nonsynonymous | 1 | 0 |
| CSMD1    | chr8  | 2820896/G//A       | nonsynonymous | 1 | 0 |
| SH2D4A   | chr8  | 19221585/C//T      | nonsynonymous | 1 | 0 |
| BNIP3L   | chr8  | 26268008/A//G      | synonymous    | 1 | 0 |
| CHRNA2   | chr8  | 27327362/G//A      | synonymous    | 1 | 0 |
| KIF13B   | chr8  | 28928143/C//T      | nonsynonymous | 1 | 0 |
| PURG     | chr8  | 30890262/G//C      | nonsynonymous | 1 | 0 |
| BRF2     | chr8  | 37707227/C//A      | nonsynonymous | 1 | 0 |
| ADAM32   | chr8  | 38994187/C//A      | synonymous    | 1 | 0 |
| ANK1     | chr8  | 41552155/C//T      | synonymous    | 1 | 0 |
| OPRK1    | chr8  | 54142387/C//T      | nonsynonymous | 1 | 0 |
| NSMAF    | chr8  | 59496766/GAA//G    | synonymous    | 1 | 0 |
| VCIPI1   | chr8  | 67547585/A//G      | synonymous    | 1 | 0 |
| MAL2     | chr8  | 120220834/G//A     | nonsynonymous | 1 | 0 |
| FAM83A   | chr8  | 124219528/C//T     | nonsynonymous | 1 | 0 |
| SQLE     | chr8  | 126017873/A//T     | nonsynonymous | 1 | 0 |
| COL22A1  | chr8  | 139895417/G//A     | synonymous    | 1 | 0 |
| CYP11B1  | chr8  | 143958291/C//T     | synonymous    | 1 | 0 |
| EPPK1    | chr8  | 144942834/C//G     | nonsynonymous | 1 | 0 |
| TAF1L    | chr9  | 32634890/G//A      | nonsynonymous | 1 | 0 |
| ABHD17B  | chr9  | 74481643/T//C      | synonymous    | 1 | 0 |
| RORB     | chr9  | 77249561/G//C      | nonsynonymous | 1 | 0 |
| SLC28A3  | chr9  | 86905135/G//A      | synonymous    | 1 | 0 |
| CDK20    | chr9  | 90589313/T//C      | nonsynonymous | 1 | 0 |
| NCBP1    | chr9  | 100420936/A//G     | nonsynonymous | 1 | 0 |
| TGFBR1   | chr9  | 101900330/G//A     | nonsynonymous | 1 | 0 |
| FSD1L    | chr9  | 108297340/T//G     | synonymous    | 1 | 0 |
| TNC      | chr9  | 117844085/G//A     | synonymous    | 1 | 0 |
| DAB2IP   | chr9  | 124535112/G//A     | nonsynonymous | 1 | 0 |
| FBXW5    | chr9  | 139837924/C//T     | synonymous    | 1 | 0 |
| FUT7     | chr9  | 139926173/G//A     | synonymous    | 1 | 0 |
| NOXA1    | chr9  | 140327534/C//T     | synonymous    | 1 | 0 |
| DIP2C    | chr10 | 518437/G//A        | synonymous    | 1 | 0 |
| PITRM1   | chr10 | 3215024/G//T       | synonymous    | 1 | 0 |
|          | chr10 | 12211341/C//T      | synonymous    | 1 | 0 |
| CAMK1D   | chr10 | 12803082/C//G      | synonymous    | 1 | 0 |
| BMS1     | chr10 | 43293948/A//G      | nonsynonymous | 1 | 0 |
| SLC18A3  | chr10 | 50820314/G//A      | nonsynonymous | 1 | 0 |
| PRKG1    | chr10 | 54053595/A//C      | nonsynonymous | 1 | 0 |
| SAR1A    | chr10 | 71913675/A//G      | synonymous    | 1 | 0 |
| PALD1    | chr10 | 72298858/G//C      | nonsynonymous | 1 | 0 |
| VCL      | chr10 | 75865016/G//A      | nonsynonymous | 1 | 0 |
| KAT6B    | chr10 | 76790263/C//T      | nonsynonymous | 1 | 0 |
| ZNF503   | chr10 | 77159617/C//A      | synonymous    | 1 | 0 |
| DLG5     | chr10 | 79603415/G//A      | nonsynonymous | 1 | 0 |
| FGFBP3   | chr10 | 93668701/G//C      | nonsynonymous | 1 | 0 |
| TWINK    | chr10 | 102750242/C//T     | nonsynonymous | 1 | 0 |
| SORCS3   | chr10 | 106970916/T//C     | synonymous    | 1 | 0 |
| HABP2    | chr10 | 115338440/G//A     | nonsynonymous | 1 | 0 |
| DCLRE1A  | chr10 | 115612525/C//T     | nonsynonymous | 1 | 0 |
| HSPA12A  | chr10 | 118434709/G//A     | synonymous    | 1 | 0 |
| SLC18A2  | chr10 | 119003780/C//A     | synonymous    | 1 | 0 |
| TACC2    | chr10 | 123848029/G//T     | synonymous    | 1 | 0 |
| GPR26    | chr10 | 125447469/G//A     | synonymous    | 1 | 0 |
| CPXM2    | chr10 | 125521473/G//A     | synonymous    | 1 | 0 |
| DHX32    | chr10 | 127527595/GCTTT//G | nonsynonymous | 1 | 0 |
| ZNF511   | chr10 | 135126453/G//T     | synonymous    | 1 | 0 |
| PGGHG    | chr11 | 294170/G//T        | synonymous    | 1 | 0 |
| B4GALNT4 | chr11 | 380434/G//A        | nonsynonymous | 1 | 0 |
| MUC2     | chr11 | 1093878/C//T       | synonymous    | 1 | 0 |
| BTBD10   | chr11 | 13410543/CTT//C    | nonsynonymous | 1 | 0 |
| OR4C6    | chr11 | 55433079/C//T      | nonsynonymous | 1 | 0 |

|           |       |                  |               |   |   |
|-----------|-------|------------------|---------------|---|---|
| TNKS1BP1  | chr11 | 57076872/C//A    | nonsynonymous | 1 | 0 |
| OR6Q1     | chr11 | 57799100/G//A    | nonsynonymous | 1 | 0 |
| PATL1     | chr11 | 59423200/C//T    | nonsynonymous | 1 | 0 |
| DAGLA     | chr11 | 61488343/C//T    | synonymous    | 1 | 0 |
| MYRF      | chr11 | 61548268/C//T    | synonymous    | 1 | 0 |
| AHNAK     | chr11 | 62288599/T//C    | synonymous    | 1 | 0 |
| HNRNPUL2  | chr11 | 62491159/T//C    | nonsynonymous | 1 | 0 |
| SLC22A8   | chr11 | 62763171/G//A    | synonymous    | 1 | 0 |
| SLC22A10  | chr11 | 63059095/A//T    | synonymous    | 1 | 0 |
| CDC42BPG  | chr11 | 64606636/C//A    | nonsynonymous | 1 | 0 |
| ATG2A     | chr11 | 64677380/G//A    | nonsynonymous | 1 | 0 |
| IGHMBP2   | chr11 | 68682330/C//A    | nonsynonymous | 1 | 0 |
| CCND1     | chr11 | 69462749/CCTT//C | synonymous    | 1 | 0 |
| KRTAP5-10 | chr11 | 71277137/C//T    | synonymous    | 1 | 0 |
| KRTAP5-10 | chr11 | 71277185/G//T    | nonsynonymous | 1 | 0 |
| P2RY6     | chr11 | 73008384/C//G    | nonsynonymous | 1 | 0 |
| DYNC2H1   | chr11 | 103082677/A//G   | synonymous    | 1 | 0 |
| CASP12    | chr11 | 104757456/G//C   | synonymous    | 1 | 0 |
| ZBTB16    | chr11 | 113934582/T//C   | nonsynonymous | 1 | 0 |
| CEP164    | chr11 | 117265138/C//T   | nonsynonymous | 1 | 0 |
| RNF26     | chr11 | 119207148/G//A   | synonymous    | 1 | 0 |
| OR8G5     | chr11 | 124135531/C//A   | nonsynonymous | 1 | 0 |
| HYLS1     | chr11 | 125769907/G//A   | nonsynonymous | 1 | 0 |
| KIRREL3   | chr11 | 126326297/G//A   | synonymous    | 1 | 0 |
| GLB1L3    | chr11 | 134147246/C//T   | nonsynonymous | 1 | 0 |
| KDM5A     | chr12 | 420151/G//C      | nonsynonymous | 1 | 0 |
| FOXM1     | chr12 | 2981358/C//T     | nonsynonymous | 1 | 0 |
| RHNO1     | chr12 | 2997405/A//G     | nonsynonymous | 1 | 0 |
| RAD51AP1  | chr12 | 4653057/A//C     | nonsynonymous | 1 | 0 |
| LPAR5     | chr12 | 6729554/G//A     | synonymous    | 1 | 0 |
| COPS7A    | chr12 | 6839962/G//A     | nonsynonymous | 1 | 0 |
| USP5      | chr12 | 6970623/C//T     | synonymous    | 1 | 0 |
| RASSF8    | chr12 | 26221731/C//A    | nonsynonymous | 1 | 0 |
| C12orf40  | chr12 | 40114947/C//G    | nonsynonymous | 1 | 0 |
| TWF1      | chr12 | 44190865/T//C    | nonsynonymous | 1 | 0 |
| SLC38A1   | chr12 | 46591792/G//A    | nonsynonymous | 1 | 0 |
| ASB8      | chr12 | 48543447/C//T    | nonsynonymous | 1 | 0 |
| CCNT1     | chr12 | 49088064/A//C    | synonymous    | 1 | 0 |
| PRPF40B   | chr12 | 50026833/CG//C   | nonsynonymous | 1 | 0 |
| KRT6B     | chr12 | 52842736/T//C    | nonsynonymous | 1 | 0 |
| KRT6A     | chr12 | 52884470/C//T    | synonymous    | 1 | 0 |
| KRT6A     | chr12 | 52885442/TCA//T  | nonsynonymous | 1 | 0 |
| KRT77     | chr12 | 53088529/G//T    | nonsynonymous | 1 | 0 |
| TNS2      | chr12 | 53453966/G//C    | nonsynonymous | 1 | 0 |
| NXPH4     | chr12 | 57619520/A//G    | nonsynonymous | 1 | 0 |
| MON2      | chr12 | 62946730/G//A    | nonsynonymous | 1 | 0 |
| DPY19L2   | chr12 | 63974589/G//A    | nonsynonymous | 1 | 0 |
| HELB      | chr12 | 66725366/C//T    | nonsynonymous | 1 | 0 |
| SART3     | chr12 | 108929156/A//G   | nonsynonymous | 1 | 0 |
| SVOP      | chr12 | 109306170/C//G   | synonymous    | 1 | 0 |
| TMEM116   | chr12 | 112381143/C//T   | synonymous    | 1 | 0 |
| TBX3      | chr12 | 115118812/C//T   | nonsynonymous | 1 | 0 |
| MLEC      | chr12 | 121134453/G//C   | synonymous    | 1 | 0 |
| ANAPC5    | chr12 | 121746346/CA//C  | nonsynonymous | 1 | 0 |
| CLIP1     | chr12 | 122839778/G//A   | nonsynonymous | 1 | 0 |
| ABCB9     | chr12 | 123428979/C//T   | nonsynonymous | 1 | 0 |
| BRI3BP    | chr12 | 125509769/C//T   | synonymous    | 1 | 0 |
| ULK1      | chr12 | 132404021/G//A   | nonsynonymous | 1 | 0 |
| EP400     | chr12 | 132446105/C//T   | nonsynonymous | 1 | 0 |
| EP400     | chr12 | 132547138/A//G   | synonymous    | 1 | 0 |
| GOLGA3    | chr12 | 133363320/C//T   | synonymous    | 1 | 0 |
| CHFR      | chr12 | 133434124/C//T   | synonymous    | 1 | 0 |
| MTMR6     | chr13 | 25839949/C//A    | synonymous    | 1 | 0 |
|           | chr13 | 31287943/C//A    | synonymous    | 1 | 0 |
| SMAD9     | chr13 | 37453599/G//A    | synonymous    | 1 | 0 |
| DGKH      | chr13 | 42789726/A//G    | nonsynonymous | 1 | 0 |
| NUFIP1    | chr13 | 45554909/C//T    | nonsynonymous | 1 | 0 |
| WDFY2     | chr13 | 52277743/G//A    | synonymous    | 1 | 0 |
| THSD1     | chr13 | 52952468/G//A    | nonsynonymous | 1 | 0 |
| RNF113B   | chr13 | 98829149/G//A    | synonymous    | 1 | 0 |

|          |       |                  |               |   |   |
|----------|-------|------------------|---------------|---|---|
| ZIC5     | chr13 | 100623858/C//G   | synonymous    | 1 | 0 |
| MCF2L    | chr13 | 113656253/G//A   | nonsynonymous | 1 | 0 |
| ZNF219   | chr14 | 21558749/C//A    | nonsynonymous | 1 | 0 |
| HNRNPC   | chr14 | 21681236/TAGG//T | nonsynonymous | 1 | 0 |
| AP1G2    | chr14 | 24029223/G//A    | nonsynonymous | 1 | 0 |
| G2E3     | chr14 | 31066642/C//T    | nonsynonymous | 1 | 0 |
| HEATR5A  | chr14 | 31771695/T//C    | nonsynonymous | 1 | 0 |
| PLEKHH1  | chr14 | 68041041/T//C    | nonsynonymous | 1 | 0 |
| VRTN     | chr14 | 74824137/G//A    | synonymous    | 1 | 0 |
| PROX2    | chr14 | 75322010/A//G    | synonymous    | 1 | 0 |
| ZC2HC1C  | chr14 | 75544237/T//C    | synonymous    | 1 | 0 |
| ZC3H14   | chr14 | 89039358/A//T    | synonymous    | 1 | 0 |
| CATSPERB | chr14 | 92105595/C//A    | nonsynonymous | 1 | 0 |
| PPP4R4   | chr14 | 94732232/C//G    | synonymous    | 1 | 0 |
| SLC25A47 | chr14 | 100793707/C//T   | synonymous    | 1 | 0 |
| ANKRD9   | chr14 | 102973591/G//A   | synonymous    | 1 | 0 |
| TRMT61A  | chr14 | 103999107/G//A   | nonsynonymous | 1 | 0 |
| CEP170B  | chr14 | 105344299/C//T   | synonymous    | 1 | 0 |
| AHNAK2   | chr14 | 105404331/T//C   | synonymous    | 1 | 0 |
| TMEM121  | chr14 | 105995640/C//A   | nonsynonymous | 1 | 0 |
| GABRB3   | chr15 | 26793246/C//A    | synonymous    | 1 | 0 |
| RYR3     | chr15 | 34157391/C//T    | synonymous    | 1 | 0 |
| FAM98B   | chr15 | 38765785/C//T    | nonsynonymous | 1 | 0 |
| RASGRP1  | chr15 | 38818504/T//C    | nonsynonymous | 1 | 0 |
| EPB42    | chr15 | 43502627/T//C    | nonsynonymous | 1 | 0 |
| FBN1     | chr15 | 48797235/G//A    | synonymous    | 1 | 0 |
| SHC4     | chr15 | 49118149/T//C    | synonymous    | 1 | 0 |
| HDC      | chr15 | 50534698/C//T    | nonsynonymous | 1 | 0 |
| GLDN     | chr15 | 51696834/C//T    | synonymous    | 1 | 0 |
| LDHAL6B  | chr15 | 59499365/G//T    | nonsynonymous | 1 | 0 |
| DIS3L    | chr15 | 66618310/T//A    | synonymous    | 1 | 0 |
| PML      | chr15 | 74335484/G//A    | synonymous    | 1 | 0 |
| CSPG4    | chr15 | 76005058/GCC//G  | nonsynonymous | 1 | 0 |
| LINGO1   | chr15 | 77906503/C//G    | nonsynonymous | 1 | 0 |
| TBC1D2B  | chr15 | 78301339/CT//C   | nonsynonymous | 1 | 0 |
| ALPK3    | chr15 | 85402497/C//T    | nonsynonymous | 1 | 0 |
| IFT140   | chr16 | 1639613/ACTT//A  | nonsynonymous | 1 | 0 |
| SPSB3    | chr16 | 1827832/G//A     | nonsynonymous | 1 | 0 |
| SRRM2    | chr16 | 2812809/GTC//G   | nonsynonymous | 1 | 0 |
| GRIN2A   | chr16 | 9858553/G//C     | nonsynonymous | 1 | 0 |
| CIITA    | chr16 | 11017153/T//TGAA | nonsynonymous | 1 | 0 |
| PARN     | chr16 | 14702131/T//C    | synonymous    | 1 | 0 |
| SMG1     | chr16 | 18856743/T//C    | synonymous    | 1 | 0 |
| GPR139   | chr16 | 20043388/C//T    | nonsynonymous | 1 | 0 |
| ACSM5    | chr16 | 20442558/G//A    | nonsynonymous | 1 | 0 |
| DNAH3    | chr16 | 21049299/G//A    | synonymous    | 1 | 0 |
| TNRC6A   | chr16 | 24801413/C//T    | nonsynonymous | 1 | 0 |
| XPO6     | chr16 | 28113013/C//T    | synonymous    | 1 | 0 |
| CD19     | chr16 | 28943721/A//C    | nonsynonymous | 1 | 0 |
| PRSS53   | chr16 | 31097474/C//T    | nonsynonymous | 1 | 0 |
| ZNF720   | chr16 | 31734623/A//G    | nonsynonymous | 1 | 0 |
| GNAO1    | chr16 | 56388837/C//T    | nonsynonymous | 1 | 0 |
| CDH11    | chr16 | 65016008/C//T    | nonsynonymous | 1 | 0 |
| SLC9A5   | chr16 | 67304745/G//A    | nonsynonymous | 1 | 0 |
| CDH1     | chr16 | 68863659/C//T    | nonsynonymous | 1 | 0 |
| NFAT5    | chr16 | 69726373/G//A    | nonsynonymous | 1 | 0 |
| WWP2     | chr16 | 69973852/G//A    | synonymous    | 1 | 0 |
| MARVELD3 | chr16 | 71668324/C//A    | nonsynonymous | 1 | 0 |
| CHST6    | chr16 | 75512953/G//C    | synonymous    | 1 | 0 |
| KLHL36   | chr16 | 84695504/C//T    | nonsynonymous | 1 | 0 |
| KLHL36   | chr16 | 84695655/C//T    | synonymous    | 1 | 0 |
| ZNF469   | chr16 | 88503047/G//C    | nonsynonymous | 1 | 0 |
| RILP     | chr17 | 1553159/G//T     | synonymous    | 1 | 0 |
| PELP1    | chr17 | 4575752/G//A     | nonsynonymous | 1 | 0 |
| NLRP1    | chr17 | 5424277/G//A     | nonsynonymous | 1 | 0 |
| ZBTB4    | chr17 | 7365648/C//A     | nonsynonymous | 1 | 0 |
| TP53     | chr17 | 7574034/C//T     | nonsynonymous | 1 | 0 |
| TP53     | chr17 | 7577518/T//A     | nonsynonymous | 1 | 0 |
| PEMT     | chr17 | 17415839/G//A    | synonymous    | 1 | 0 |
| MTRNR2L1 | chr17 | 22023530/A//C    | synonymous    | 1 | 0 |

|           |       |                  |               |   |   |
|-----------|-------|------------------|---------------|---|---|
| SDF2      | chr17 | 26976023/T//C    | nonsynonymous | 1 | 0 |
| TAOK1     | chr17 | 27857627/C//T    | nonsynonymous | 1 | 0 |
| CPD       | chr17 | 28754462/C//T    | nonsynonymous | 1 | 0 |
| GAS2L2    | chr17 | 34074134/G//A    | nonsynonymous | 1 | 0 |
| PIP4K2B   | chr17 | 36934060/G//A    | synonymous    | 1 | 0 |
| RPL19     | chr17 | 37359334/C//T    | nonsynonymous | 1 | 0 |
| ERBB2     | chr17 | 37864609/T//A    | synonymous    | 1 | 0 |
| ERBB2     | chr17 | 37881117/C//T    | nonsynonymous | 1 | 0 |
| SEPT4     | chr17 | 56604288/C//T    | nonsynonymous | 1 | 0 |
| USP32     | chr17 | 58257965/C//T    | nonsynonymous | 1 | 0 |
| MRC2      | chr17 | 60769762/GAGA//G | nonsynonymous | 1 | 0 |
| HELZ      | chr17 | 65174911/A//G    | nonsynonymous | 1 | 0 |
| USH1G     | chr17 | 72916114/G//A    | nonsynonymous | 1 | 0 |
| ZACN      | chr17 | 74077751/G//A    | synonymous    | 1 | 0 |
| ARHGAP28  | chr18 | 6912088/A//G     | nonsynonymous | 1 | 0 |
| LAMA3     | chr18 | 21492704/A//T    | nonsynonymous | 1 | 0 |
|           | chr18 | 47801738/A//G    | synonymous    | 1 | 0 |
| KIAA1468  | chr18 | 59958838/A//T    | nonsynonymous | 1 | 0 |
| TNFRSF11A | chr18 | 60017115/C//T    | synonymous    | 1 | 0 |
| RPS15     | chr19 | 1440483/A//G     | synonymous    | 1 | 0 |
| ADAMTSL5  | chr19 | 1510222/T//C     | synonymous    | 1 | 0 |
| SCAMP4    | chr19 | 1918235/G//A     | synonymous    | 1 | 0 |
| CACTIN    | chr19 | 3612040/C//T     | nonsynonymous | 1 | 0 |
| MCOLN1    | chr19 | 7589905/G//A     | synonymous    | 1 | 0 |
| CAMSAP3   | chr19 | 7682305/G//A     | synonymous    | 1 | 0 |
| XAB2      | chr19 | 7691028/G//A     | synonymous    | 1 | 0 |
| RDH8      | chr19 | 10131976/G//A    | synonymous    | 1 | 0 |
| ICAM5     | chr19 | 10404957/C//T    | synonymous    | 1 | 0 |
| DNM2      | chr19 | 10897376/T//C    | nonsynonymous | 1 | 0 |
| RGL3      | chr19 | 11513326/T//C    | synonymous    | 1 | 0 |
| ECSIT     | chr19 | 11623974/G//T    | nonsynonymous | 1 | 0 |
| MED26     | chr19 | 16687225/G//A    | synonymous    | 1 | 0 |
| MAST3     | chr19 | 18246590/A//G    | synonymous    | 1 | 0 |
| KIAA1683  | chr19 | 18377225/G//C    | nonsynonymous | 1 | 0 |
| WDR62     | chr19 | 36590368/G//A    | nonsynonymous | 1 | 0 |
| SIPA1L3   | chr19 | 38610519/G//A    | synonymous    | 1 | 0 |
| RYR1      | chr19 | 38983263/G//T    | nonsynonymous | 1 | 0 |
| ACTN4     | chr19 | 39218599/C//T    | nonsynonymous | 1 | 0 |
| MRPS12    | chr19 | 39421403/C//T    | synonymous    | 1 | 0 |
| CIC       | chr19 | 42797897/G//A    | nonsynonymous | 1 | 0 |
| CD177     | chr19 | 43866319/C//T    | synonymous    | 1 | 0 |
| PPP1R13L  | chr19 | 45900161/C//T    | synonymous    | 1 | 0 |
| EML2      | chr19 | 46112990/CAAG//C | nonsynonymous | 1 | 0 |
| LMTK3     | chr19 | 49001687/G//T    | nonsynonymous | 1 | 0 |
| SPHK2     | chr19 | 49130982/G//A    | nonsynonymous | 1 | 0 |
| IZUMO1    | chr19 | 49249059/C//T    | nonsynonymous | 1 | 0 |
| GFY       | chr19 | 49930172/G//A    | nonsynonymous | 1 | 0 |
| ZNF880    | chr19 | 52888185/T//C    | nonsynonymous | 1 | 0 |
| DEFB128   | chr20 | 168578/A//G      | synonymous    | 1 | 0 |
| ANKEF1    | chr20 | 10032460/C//T    | nonsynonymous | 1 | 0 |
| ISM1      | chr20 | 13279968/C//T    | synonymous    | 1 | 0 |
| XKR7      | chr20 | 30584994/C//T    | nonsynonymous | 1 | 0 |
| ZNF341    | chr20 | 32354736/G//A    | synonymous    | 1 | 0 |
| AHCY      | chr20 | 32873320/G//A    | nonsynonymous | 1 | 0 |
| RBM12     | chr20 | 34242709/G//A    | nonsynonymous | 1 | 0 |
| RPRD1B    | chr20 | 36687923/G//A    | nonsynonymous | 1 | 0 |
| JPH2      | chr20 | 42788528/C//T    | nonsynonymous | 1 | 0 |
| PCIF1     | chr20 | 44572014/G//A    | nonsynonymous | 1 | 0 |
| SLC12A5   | chr20 | 44675053/C//T    | nonsynonymous | 1 | 0 |
| ELMO2     | chr20 | 45000037/A//AT   | nonsynonymous | 1 | 0 |
| CSTF1     | chr20 | 54974209/G//A    | nonsynonymous | 1 | 0 |
| VAPB      | chr20 | 56993394/T//C    | synonymous    | 1 | 0 |
| EDN3      | chr20 | 57876579/A//G    | nonsynonymous | 1 | 0 |
| EDN3      | chr20 | 57899449/G//A    | nonsynonymous | 1 | 0 |
| RTEL1     | chr20 | 62321766/T//C    | synonymous    | 1 | 0 |
| ZNF512B   | chr20 | 62597541/C//T    | synonymous    | 1 | 0 |
| SCAF4     | chr21 | 33065620/C//T    | synonymous    | 1 | 0 |
| GART      | chr21 | 34889745/T//C    | nonsynonymous | 1 | 0 |
| CRYZL1    | chr21 | 34975783/C//T    | nonsynonymous | 1 | 0 |
| TRPM2     | chr21 | 45845653/C//G    | synonymous    | 1 | 0 |

|          |       |                |               |   |   |
|----------|-------|----------------|---------------|---|---|
| CCT8L2   | chr22 | 17073274/C//T  | nonsynonymous | 1 | 0 |
|          | chr22 | 19754165/C//T  | synonymous    | 1 | 0 |
| ARVCF    | chr22 | 19966562/C//T  | nonsynonymous | 1 | 0 |
| SLC7A4   | chr22 | 21384159/T//C  | synonymous    | 1 | 0 |
| CRYBB3   | chr22 | 25598651/A//G  | nonsynonymous | 1 | 0 |
| MYO18B   | chr22 | 26423180/C//A  | nonsynonymous | 1 | 0 |
| MYO18B   | chr22 | 26423555/G//A  | nonsynonymous | 1 | 0 |
| PES1     | chr22 | 30984072/T//C  | nonsynonymous | 1 | 0 |
| SELENOM  | chr22 | 31500945/C//T  | synonymous    | 1 | 0 |
| ANKRD54  | chr22 | 38240040/T//C  | nonsynonymous | 1 | 0 |
| SUN2     | chr22 | 39135889/G//A  | synonymous    | 1 | 0 |
| MCHR1    | chr22 | 41075523/C//T  | nonsynonymous | 1 | 0 |
| TSPO     | chr22 | 43555376/G//A  | synonymous    | 1 | 0 |
| MAPK8IP2 | chr22 | 51045120/G//A  | nonsynonymous | 1 | 0 |
| OFD1     | chrX  | 13775826/C//T  | nonsynonymous | 1 | 0 |
| POLA1    | chrX  | 24906168/C//T  | nonsynonymous | 1 | 0 |
| NUDT10   | chrX  | 51076184/G//A  | nonsynonymous | 1 | 0 |
| MAGED1   | chrX  | 51640086/G//A  | synonymous    | 1 | 0 |
| PFKFB1   | chrX  | 54978512/G//A  | synonymous    | 1 | 0 |
| SATL1    | chrX  | 84363646/G//A  | nonsynonymous | 1 | 0 |
| UBE2A    | chrX  | 118708946/T//C | nonsynonymous | 1 | 0 |
| PRR32    | chrX  | 125953839/G//A | nonsynonymous | 1 | 0 |
| MAGEC1   | chrX  | 140995221/G//T | nonsynonymous | 1 | 0 |
| FUNDC2   | chrX  | 154255300/T//C | synonymous    | 1 | 0 |
| VPS13D   | chr1  | 12445319/A//G  | nonsynonymous | 1 | 0 |
| SLC44A3  | chr1  | 95360480/T//C  | synonymous    | 1 | 0 |
| FRRS1    | chr1  | 100174463/T//A | synonymous    | 1 | 0 |
| RPS27    | chr1  | 153964631/G//C | synonymous    | 1 | 0 |
| SLC30A1  | chr1  | 211749375/T//C | synonymous    | 1 | 0 |
| RYR2     | chr1  | 237664160/G//A | nonsynonymous | 1 | 0 |
| IFT172   | chr2  | 27686052/T//C  | synonymous    | 1 | 0 |
| HEATR5B  | chr2  | 37234186/G//A  | synonymous    | 1 | 0 |
| STK39    | chr2  | 169020398/G//C | synonymous    | 1 | 0 |
| TTN      | chr2  | 179569262/G//A | synonymous    | 1 | 0 |
| C2orf80  | chr2  | 209047702/C//T | nonsynonymous | 1 | 0 |
| PID1     | chr2  | 229890713/A//G | nonsynonymous | 1 | 0 |
| PLCD1    | chr3  | 38050093/C//T  | nonsynonymous | 1 | 0 |
| KIF15    | chr3  | 44841826/C//T  | synonymous    | 1 | 0 |
| RAD54L2  | chr3  | 51663425/C//T  | synonymous    | 1 | 0 |
| PLCXD2   | chr3  | 111564693/T//C | synonymous    | 1 | 0 |
| ATR      | chr3  | 142176574/T//A | nonsynonymous | 1 | 0 |
| ABCE1    | chr4  | 146041246/T//G | nonsynonymous | 1 | 0 |
| COL4A3BP | chr5  | 74677794/C//T  | nonsynonymous | 1 | 0 |
| KCNK5    | chr6  | 39196818/C//G  | nonsynonymous | 1 | 0 |
| TRDN     | chr6  | 123637635/C//T | nonsynonymous | 1 | 0 |
| KMT2E    | chr7  | 104753697/C//G | nonsynonymous | 1 | 0 |
| LAMB4    | chr7  | 107696158/G//C | nonsynonymous | 1 | 0 |
| DMTN     | chr8  | 21938306/G//T  | synonymous    | 1 | 0 |
| INTS8    | chr8  | 95862307/T//A  | nonsynonymous | 1 | 0 |
| RNF19A   | chr8  | 101270869/T//C | nonsynonymous | 1 | 0 |
| TG       | chr8  | 133899078/A//G | synonymous    | 1 | 0 |
| PLEC     | chr8  | 144997124/G//A | nonsynonymous | 1 | 0 |
| SHB      | chr9  | 38068530/G//T  | nonsynonymous | 1 | 0 |
| UPF2     | chr10 | 12043762/C//T  | nonsynonymous | 1 | 0 |
| SGPL1    | chr10 | 72604402/A//G  | synonymous    | 1 | 0 |
| ATRNL1   | chr10 | 117704243/G//T | nonsynonymous | 1 | 0 |
| TSG101   | chr11 | 18502110/G//C  | nonsynonymous | 1 | 0 |
| ATG2A    | chr11 | 64684591/C//A  | nonsynonymous | 1 | 0 |
| ATM      | chr11 | 108205715/A//G | nonsynonymous | 1 | 0 |
| DIP2B    | chr12 | 51089627/A//G  | synonymous    | 1 | 0 |
| MARS     | chr12 | 57884360/A//G  | nonsynonymous | 1 | 0 |
| TEP1     | chr14 | 20852283/G//T  | nonsynonymous | 1 | 0 |
| ZFHX2    | chr14 | 24003001/C//G  | nonsynonymous | 1 | 0 |
| SNX22    | chr15 | 64448109/G//A  | synonymous    | 1 | 0 |
| CHRNB4   | chr15 | 78927918/C//T  | nonsynonymous | 1 | 0 |
|          | chr16 | 1538427/G//A   | synonymous    | 1 | 0 |
| PRKCB    | chr16 | 24166020/C//T  | nonsynonymous | 1 | 0 |
| CNOT1    | chr16 | 58559155/A//T  | nonsynonymous | 1 | 0 |
| AP1G1    | chr16 | 71783814/C//A  | nonsynonymous | 1 | 0 |
| TP53     | chr17 | 7578413/C//A   | nonsynonymous | 1 | 0 |

|          |       |                |               |   |   |
|----------|-------|----------------|---------------|---|---|
| THRA     | chr17 | 38233768/C//A  | synonymous    | 1 | 0 |
| LRRC37A3 | chr17 | 62856675/C//G  | nonsynonymous | 1 | 0 |
| GALNT1   | chr18 | 33270984/G//C  | nonsynonymous | 1 | 0 |
| ZNF407   | chr18 | 72775831/G//A  | nonsynonymous | 1 | 0 |
| POLRMT   | chr19 | 622638/G//A    | nonsynonymous | 1 | 0 |
| SIN3B    | chr19 | 16952697/G//A  | nonsynonymous | 1 | 0 |
| OSCAR    | chr19 | 54600341/T//G  | synonymous    | 1 | 0 |
| ZNF132   | chr19 | 58946103/G//A  | synonymous    | 1 | 0 |
| ITCH     | chr20 | 33057906/A//G  | nonsynonymous | 1 | 0 |
| CXADR    | chr21 | 18931369/C//G  | nonsynonymous | 1 | 0 |
| TTC3     | chr21 | 38563669/A//G  | nonsynonymous | 1 | 0 |
| TCN2     | chr22 | 31022450/T//A  | nonsynonymous | 1 | 0 |
| ZMAT1    | chrX  | 101139265/A//G | synonymous    | 1 | 0 |
| RAB9B    | chrX  | 103080648/G//A | nonsynonymous | 1 | 0 |
| SAGE1    | chrX  | 134988659/C//T | nonsynonymous | 1 | 0 |
| HNRNPCL2 | chr1  | 13183853/T//G  | nonsynonymous | 1 | 0 |
| PADI2    | chr1  | 17420055/C//T  | synonymous    | 1 | 0 |
| GLIS1    | chr1  | 53972275/C//T  | synonymous    | 1 | 0 |
| PRKAA2   | chr1  | 57169717/A//G  | nonsynonymous | 1 | 0 |
| PKN2     | chr1  | 89298839/G//A  | nonsynonymous | 1 | 0 |
| AXDND1   | chr1  | 179502923/C//G | synonymous    | 1 | 0 |
| ZBTB41   | chr1  | 197144168/C//T | nonsynonymous | 1 | 0 |
| ZP4      | chr1  | 238050843/C//T | nonsynonymous | 1 | 0 |
| TRIM58   | chr1  | 248039452/G//A | synonymous    | 1 | 0 |
| OR2T12   | chr1  | 248458297/T//C | nonsynonymous | 1 | 0 |
| CLEC4F   | chr2  | 71036884/C//T  | nonsynonymous | 1 | 0 |
| CNNM4    | chr2  | 97474314/C//G  | nonsynonymous | 1 | 0 |
| PSD4     | chr2  | 113956779/G//A | synonymous    | 1 | 0 |
|          | chr2  | 119988596/A//T | synonymous    | 1 | 0 |
| ITGB6    | chr2  | 160982983/C//T | nonsynonymous | 1 | 0 |
| STAB1    | chr3  | 52536044/C//A  | synonymous    | 1 | 0 |
| GABRR3   | chr3  | 97720604/G//T  | nonsynonymous | 1 | 0 |
| PARP14   | chr3  | 122447262/C//T | nonsynonymous | 1 | 0 |
| KIT      | chr4  | 55564590/T//G  | nonsynonymous | 1 | 0 |
|          | chr4  | 79366897/C//T  | synonymous    | 1 | 0 |
| PRSS12   | chr4  | 119253011/G//A | synonymous    | 1 | 0 |
| CCDC110  | chr4  | 186382206/A//G | synonymous    | 1 | 0 |
| MARCH6   | chr5  | 10387177/A//G  | nonsynonymous | 1 | 0 |
| RUFY1    | chr5  | 178996325/T//A | nonsynonymous | 1 | 0 |
|          | chr6  | 56480266/C//T  | synonymous    | 1 | 0 |
| SLC13A1  | chr7  | 122768934/G//A | synonymous    | 1 | 0 |
| MGAM     | chr7  | 141727444/C//T | nonsynonymous | 1 | 0 |
| OR9A2    | chr7  | 142724086/A//G | nonsynonymous | 1 | 0 |
| RIMS2    | chr8  | 105261014/C//T | nonsynonymous | 1 | 0 |
| WASHC5   | chr8  | 126040860/A//G | nonsynonymous | 1 | 0 |
| NFX1     | chr9  | 33301295/C//T  | synonymous    | 1 | 0 |
| CUTC     | chr10 | 101502932/G//A | synonymous    | 1 | 0 |
| SLC17A6  | chr11 | 22398954/C//T  | nonsynonymous | 1 | 0 |
| PPP1R32  | chr11 | 61252831/G//A  | nonsynonymous | 1 | 0 |
| TYR      | chr11 | 88924593/T//G  | synonymous    | 1 | 0 |
| ROBO4    | chr11 | 124754768/G//A | synonymous    | 1 | 0 |
| RYR3     | chr15 | 33939653/A//G  | nonsynonymous | 1 | 0 |
| HS3ST4   | chr16 | 25704462/G//T  | nonsynonymous | 1 | 0 |
| HEATR3   | chr16 | 50134219/G//A  | nonsynonymous | 1 | 0 |
| CTNS     | chr17 | 3563552/A//G   | synonymous    | 1 | 0 |
| TP53     | chr17 | 7577570/C//T   | nonsynonymous | 1 | 0 |
| MYH3     | chr17 | 10539129/A//G  | nonsynonymous | 1 | 0 |
| KRT27    | chr17 | 38935798/T//C  | nonsynonymous | 1 | 0 |
| ERN1     | chr17 | 62131714/G//GC | nonsynonymous | 1 | 0 |
| CAMSAP3  | chr19 | 7676432/C//T   | nonsynonymous | 1 | 0 |
| PGLYRP2  | chr19 | 15586561/C//T  | nonsynonymous | 1 | 0 |
| HIF3A    | chr19 | 46823722/G//A  | nonsynonymous | 1 | 0 |
| ZNF615   | chr19 | 52496302/C//T  | nonsynonymous | 1 | 0 |
| CDH4     | chr20 | 60448812/C//T  | synonymous    | 1 | 0 |
| ODF3B    | chr22 | 50968939/C//T  | synonymous    | 1 | 0 |
| NPHP4    | chr1  | 5965747/C//T   | nonsynonymous | 1 | 0 |
| RNF207   | chr1  | 6272454/G//T   | nonsynonymous | 1 | 0 |
| PER3     | chr1  | 7880583/A//G   | nonsynonymous | 1 | 0 |
| KIF1B    | chr1  | 10435439/G//A  | synonymous    | 1 | 0 |
| EPHA2    | chr1  | 16475231/G//C  | nonsynonymous | 1 | 0 |

|          |      |                           |               |   |   |
|----------|------|---------------------------|---------------|---|---|
| RLF      | chr1 | 40703752/G//A             | synonymous    | 1 | 0 |
| SLC5A9   | chr1 | 48695053/G//T             | nonsynonymous | 1 | 0 |
| ZCCHC11  | chr1 | 52991624/T//C             | nonsynonymous | 1 | 0 |
| FPGT     | chr1 | 74670869/G//A             | nonsynonymous | 1 | 0 |
| RBMXL1   | chr1 | 89448360/C//T             | nonsynonymous | 1 | 0 |
| SLC35A3  | chr1 | 100483364/C//T            | nonsynonymous | 1 | 0 |
| SV2A     | chr1 | 149878248/G//A            | synonymous    | 1 | 0 |
| FLG      | chr1 | 152275272/C//T            | synonymous    | 1 | 0 |
| C1orf68  | chr1 | 152692046/G//T            | nonsynonymous | 1 | 0 |
| UBQLN4   | chr1 | 156021535/G//A            | synonymous    | 1 | 0 |
| SPTA1    | chr1 | 158592931/T//C            | nonsynonymous | 1 | 0 |
| PAPPA2   | chr1 | 176564215/C//T            | nonsynonymous | 1 | 0 |
| KIF21B   | chr1 | 200957951/G//A            | nonsynonymous | 1 | 0 |
| MYBPH    | chr1 | 203139438/G//A            | synonymous    | 1 | 0 |
| KCNH1    | chr1 | 211192148/G//A            | nonsynonymous | 1 | 0 |
| PROX1    | chr1 | 214170759/G//T            | nonsynonymous | 1 | 0 |
| DISP1    | chr1 | 223177211/G//T            | nonsynonymous | 1 | 0 |
| OBSCN    | chr1 | 228412325/C//A            | nonsynonymous | 1 | 0 |
| OBSCN    | chr1 | 228467628/G//C            | nonsynonymous | 1 | 0 |
| ACTN2    | chr1 | 236902765/C//T            | nonsynonymous | 1 | 0 |
| NLRP3    | chr1 | 247588899/T//G            | nonsynonymous | 1 | 0 |
| EFR3B    | chr2 | 25360213/T//C             | nonsynonymous | 1 | 0 |
| LRPPRC   | chr2 | 44161330/T//A             | nonsynonymous | 1 | 0 |
| DYSF     | chr2 | 71891491/T//G             | synonymous    | 1 | 0 |
| LRRTM4   | chr2 | 77746041/G//T             | nonsynonymous | 1 | 0 |
| IMMT     | chr2 | 86398377/A//T             | synonymous    | 1 | 0 |
| RFX8     | chr2 | 102029410/C//T            | nonsynonymous | 1 | 0 |
| RABL2A   | chr2 | 114398961/T//G            | nonsynonymous | 1 | 0 |
| MYO7B    | chr2 | 128387277/AGGGGCTGCTGGCC  | nonsynonymous | 1 | 0 |
| EPC2     | chr2 | 149520259/G//A            | nonsynonymous | 1 | 0 |
| RIF1     | chr2 | 152321302/C//T            | synonymous    | 1 | 0 |
| KCNJ3    | chr2 | 155555917/G//A            | synonymous    | 1 | 0 |
| LY75     | chr2 | 160661546/T//C            | synonymous    | 1 | 0 |
| GCG      | chr2 | 163002150/G//C            | nonsynonymous | 1 | 0 |
| IFIH1    | chr2 | 163124655/C//T            | nonsynonymous | 1 | 0 |
| TLK1     | chr2 | 171850380/G//A            | synonymous    | 1 | 0 |
| TTN      | chr2 | 179483024/G//T            | nonsynonymous | 1 | 0 |
| TTN      | chr2 | 179489185/T//C            | synonymous    | 1 | 0 |
| TTN      | chr2 | 179547952/G//C            | nonsynonymous | 1 | 0 |
| ALS2     | chr2 | 202574690/G//A            | synonymous    | 1 | 0 |
| PLEKHM3  | chr2 | 208866116/GTTTC//G        | nonsynonymous | 1 | 0 |
| FN1      | chr2 | 216242892/A//T            | synonymous    | 1 | 0 |
| PLCD4    | chr2 | 219496858/G//T            | nonsynonymous | 1 | 0 |
| DOCK10   | chr2 | 225658118/C//A            | nonsynonymous | 1 | 0 |
| HDLBP    | chr2 | 242169368/G//A            | synonymous    | 1 | 0 |
| CHL1     | chr3 | 367721/TGAAGCTAAAGGAAATC  | nonsynonymous | 1 | 0 |
| VILL     | chr3 | 38035917/G//A             | nonsynonymous | 1 | 0 |
| GPR62    | chr3 | 51989671/G//T             | nonsynonymous | 1 | 0 |
| ROBO2    | chr3 | 77638071/C//A             | synonymous    | 1 | 0 |
| ROBO1    | chr3 | 78701027/C//A             | nonsynonymous | 1 | 0 |
| C3orf38  | chr3 | 88199071/G//T             | synonymous    | 1 | 0 |
| B4GALT4  | chr3 | 118935087/C//T            | nonsynonymous | 1 | 0 |
| SNX4     | chr3 | 125216764/G//A            | nonsynonymous | 1 | 0 |
| CLSTN2   | chr3 | 140282841/G//A            | nonsynonymous | 1 | 0 |
| CHST2    | chr3 | 142840531/C//T            | synonymous    | 1 | 0 |
| SI       | chr3 | 164712164/A//C            | synonymous    | 1 | 0 |
| SI       | chr3 | 164750461/C//T            | nonsynonymous | 1 | 0 |
| PHC3     | chr3 | 169814896/A//G            | synonymous    | 1 | 0 |
| PIK3CA   | chr3 | 178937391/C//G            | nonsynonymous | 1 | 0 |
| ATP11B   | chr3 | 182603777/C//T            | synonymous    | 1 | 0 |
| STIM2    | chr4 | 27019406/G//A             | synonymous    | 1 | 0 |
| SLC4A4   | chr4 | 72433713/A//T             | synonymous    | 1 | 0 |
| ANKRD17  | chr4 | 74019594/T//C             | synonymous    | 1 | 0 |
| PPEF2    | chr4 | 76794285/G//A             | nonsynonymous | 1 | 0 |
| RASGEF1B | chr4 | 82366714/G//A             | synonymous    | 1 | 0 |
| CCSER1   | chr4 | 92520156/ACCACAATTTACACAG | nonsynonymous | 1 | 0 |
| CCSER1   | chr4 | 92520174/C//T             | nonsynonymous | 1 | 0 |
| CCSER1   | chr4 | 92520175/TGAGCTGCAAA//T   | nonsynonymous | 1 | 0 |
| UBE2D3   | chr4 | 103747635/G//A            | synonymous    | 1 | 0 |
| DKK2     | chr4 | 107956805/G//T            | synonymous    | 1 | 0 |



|          |      |                           |               |   |   |
|----------|------|---------------------------|---------------|---|---|
| ETNPPL   | chr4 | 109670581/T//A            | nonsynonymous | 1 | 0 |
| ZGRF1    | chr4 | 113469451/C//T            | nonsynonymous | 1 | 0 |
| TDO2     | chr4 | 156835591/G//A            | synonymous    | 1 | 0 |
| TKTL2    | chr4 | 164393564/G//T            | nonsynonymous | 1 | 0 |
| DROSHA   | chr5 | 31466282/T//C             | synonymous    | 1 | 0 |
| ADAMTS12 | chr5 | 33881391/C//T             | nonsynonymous | 1 | 0 |
| MCCC2    | chr5 | 70922531/ACATCATTGTACGCAA | nonsynonymous | 1 | 0 |
| MCCC2    | chr5 | 70922553/T//A             | synonymous    | 1 | 0 |
| ANKRD34B | chr5 | 79855537/A//G             | nonsynonymous | 1 | 0 |
| SLC27A6  | chr5 | 128320968/C//A            | nonsynonymous | 1 | 0 |
| NEUROG1  | chr5 | 134871299/C//T            | nonsynonymous | 1 | 0 |
| TRPC7    | chr5 | 135587379/G//A            | nonsynonymous | 1 | 0 |
| PCDHA1   | chr5 | 140167538/G//A            | nonsynonymous | 1 | 0 |
| PCDHA5   | chr5 | 140201441/C//T            | synonymous    | 1 | 0 |
| PCDHA5   | chr5 | 140202764/G//A            | synonymous    | 1 | 0 |
| PCDHB13  | chr5 | 140594759/G//T            | nonsynonymous | 1 | 0 |
| PCDHGA3  | chr5 | 140725379/G//A            | synonymous    | 1 | 0 |
| PCDHGA6  | chr5 | 140753744/C//T            | nonsynonymous | 1 | 0 |
| PCDHGB7  | chr5 | 140798986/C//T            | synonymous    | 1 | 0 |
| PCDHGC4  | chr5 | 140866165/C//T            | synonymous    | 1 | 0 |
| CANX     | chr5 | 179150724/A//AT           | nonsynonymous | 1 | 0 |
| MAPK9    | chr5 | 179669720/C//A            | nonsynonymous | 1 | 0 |
| IRF4     | chr6 | 395850/C//T               | nonsynonymous | 1 | 0 |
| FARS2    | chr6 | 5369019/C//T              | synonymous    | 1 | 0 |
| NHLRC1   | chr6 | 18122670/G//A             | synonymous    | 1 | 0 |
| OR2W1    | chr6 | 29012626/T//G             | synonymous    | 1 | 0 |
| ZBTB12   | chr6 | 31867627/C//T             | synonymous    | 1 | 0 |
| TMEM217  | chr6 | 37186731/C//T             | nonsynonymous | 1 | 0 |
| ZFAND3   | chr6 | 38050189/C//A             | nonsynonymous | 1 | 0 |
| PGC      | chr6 | 41710065/C//T             | nonsynonymous | 1 | 0 |
| PHF3     | chr6 | 64394926/A//G             | nonsynonymous | 1 | 0 |
| MTO1     | chr6 | 74183155/T//C             | synonymous    | 1 | 0 |
| ORC3     | chr6 | 88375530/A//C             | nonsynonymous | 1 | 0 |
| MDN1     | chr6 | 90398499/G//T             | synonymous    | 1 | 0 |
| RTN4IP1  | chr6 | 107067184/T//C            | synonymous    | 1 | 0 |
| ADGRG6   | chr6 | 142688724/G//A            | nonsynonymous | 1 | 0 |
| ADGB     | chr6 | 147067127/C//T            | nonsynonymous | 1 | 0 |
| AGMO     | chr7 | 15405821/C//T             | synonymous    | 1 | 0 |
| ABCB5    | chr7 | 20738104/G//T             | synonymous    | 1 | 0 |
| GPNMB    | chr7 | 23293803/C//T             | nonsynonymous | 1 | 0 |
| NME8     | chr7 | 37907316/G//A             | nonsynonymous | 1 | 0 |
| INHBA    | chr7 | 41739831/G//A             | nonsynonymous | 1 | 0 |
| ZMIZ2    | chr7 | 44804069/A//T             | nonsynonymous | 1 | 0 |
| PPIA     | chr7 | 44836318/T//C             | synonymous    | 1 | 0 |
| ABHD11   | chr7 | 73151688/T//C             | nonsynonymous | 1 | 0 |
| PCLO     | chr7 | 82579199/T//C             | nonsynonymous | 1 | 0 |
| COL1A2   | chr7 | 94055176/T//G             | synonymous    | 1 | 0 |
| MCM7     | chr7 | 99694962/G//C             | nonsynonymous | 1 | 0 |
| ACHE     | chr7 | 100491410/C//A            | nonsynonymous | 1 | 0 |
| BCAP29   | chr7 | 107258995/G//C            | synonymous    | 1 | 0 |
| LAMB4    | chr7 | 107689976/T//A            | nonsynonymous | 1 | 0 |
| ANKRD7   | chr7 | 117874934/T//A            | synonymous    | 1 | 0 |
| KCND2    | chr7 | 119915254/G//T            | nonsynonymous | 1 | 0 |
| KCNH2    | chr7 | 150649608/G//A            | nonsynonymous | 1 | 0 |
| LZTS1    | chr8 | 20112394/G//A             | nonsynonymous | 1 | 0 |
| NRG1     | chr8 | 32621347/G//T             | synonymous    | 1 | 0 |
| ANK1     | chr8 | 41575636/G//A             | synonymous    | 1 | 0 |
| RP1      | chr8 | 55537987/A//G             | synonymous    | 1 | 0 |
| CSPP1    | chr8 | 68105701/T//C             | synonymous    | 1 | 0 |
| PREX2    | chr8 | 68965402/G//C             | nonsynonymous | 1 | 0 |
| CALB1    | chr8 | 91072901/C//G             | nonsynonymous | 1 | 0 |
| VPS13B   | chr8 | 100147903/G//A            | nonsynonymous | 1 | 0 |
| KLHL38   | chr8 | 124663910/C//G            | synonymous    | 1 | 0 |
| RNF139   | chr8 | 125498278/C//G            | nonsynonymous | 1 | 0 |
| TG       | chr8 | 133980140/G//T            | nonsynonymous | 1 | 0 |
| ADGRB1   | chr8 | 143545648/C//T            | nonsynonymous | 1 | 0 |
| GLI4     | chr8 | 144351647/C//T            | synonymous    | 1 | 0 |
| TOP1MT   | chr8 | 144399908/G//A            | nonsynonymous | 1 | 0 |
| MROH6    | chr8 | 144651916/C//T            | nonsynonymous | 1 | 0 |
| ACER2    | chr9 | 19423888/C//T             | nonsynonymous | 1 | 0 |

|           |       |                            |               |   |   |
|-----------|-------|----------------------------|---------------|---|---|
| NUDT2     | chr9  | 34343282/G//A              | synonymous    | 1 | 0 |
| TRPM3     | chr9  | 73478010/C//G              | synonymous    | 1 | 0 |
| GDA       | chr9  | 74856086/C//A              | nonsynonymous | 1 | 0 |
| ABCA1     | chr9  | 107549250/G//C             | nonsynonymous | 1 | 0 |
| OLFM1     | chr9  | 138011714/A//G             | nonsynonymous | 1 | 0 |
| PNPLA7    | chr9  | 140356418/C//T             | nonsynonymous | 1 | 0 |
| CUBN      | chr10 | 16979675/C//T              | nonsynonymous | 1 | 0 |
| ARHGAP21  | chr10 | 24874952/C//T              | synonymous    | 1 | 0 |
| GAD2      | chr10 | 26506787/C//T              | synonymous    | 1 | 0 |
| TET1      | chr10 | 70406266/G//A              | synonymous    | 1 | 0 |
| SGPL1     | chr10 | 72633183/G//A              | nonsynonymous | 1 | 0 |
| GLUD1     | chr10 | 88822577/C//A              | nonsynonymous | 1 | 0 |
| MGEA5     | chr10 | 103553759/T//C             | synonymous    | 1 | 0 |
| SFXN4     | chr10 | 120907319/C//A             | synonymous    | 1 | 0 |
| PTPRE     | chr10 | 129864349/A//G             | nonsynonymous | 1 | 0 |
| STK32C    | chr10 | 134041533/G//A             | nonsynonymous | 1 | 0 |
| OR52H1    | chr11 | 5566493/AGGCACACCAGCTGT/// | nonsynonymous | 1 | 0 |
| OR6A2     | chr11 | 6816354/C//A               | nonsynonymous | 1 | 0 |
| MRGPRX1   | chr11 | 18955962/C//T              | nonsynonymous | 1 | 0 |
| OR9G4     | chr11 | 56511209/A//G              | nonsynonymous | 1 | 0 |
| OR1S2     | chr11 | 57971225/C//T              | synonymous    | 1 | 0 |
| NUMA1     | chr11 | 71726928/G//A              | nonsynonymous | 1 | 0 |
| NOX4      | chr11 | 89073252/T//G              | nonsynonymous | 1 | 0 |
| TRIM49C   | chr11 | 89774527/A//T              | nonsynonymous | 1 | 0 |
| DYNC2H1   | chr11 | 103062891/C//T             | nonsynonymous | 1 | 0 |
| GRIK4     | chr11 | 120530973/C//T             | synonymous    | 1 | 0 |
| ARHGAP32  | chr11 | 128932218/G//T             | nonsynonymous | 1 | 0 |
| B3GAT1    | chr11 | 134253812/G//A             | nonsynonymous | 1 | 0 |
| TARBP2    | chr12 | 53899960/C//A              | synonymous    | 1 | 0 |
| OR6C6     | chr12 | 55689001/T//C              | nonsynonymous | 1 | 0 |
| PPFIA2    | chr12 | 81733050/G//T              | nonsynonymous | 1 | 0 |
| CCER1     | chr12 | 91348462/C//T              | nonsynonymous | 1 | 0 |
| TMEM119   | chr12 | 108985818/G//A             | synonymous    | 1 | 0 |
| TRAFD1    | chr12 | 112585936/G//C             | nonsynonymous | 1 | 0 |
| MED13L    | chr12 | 116421060/C//A             | nonsynonymous | 1 | 0 |
| DNAH10    | chr12 | 124408866/G//A             | nonsynonymous | 1 | 0 |
| POSTN     | chr13 | 38158129/G//T              | nonsynonymous | 1 | 0 |
| GPC5      | chr13 | 93518681/G//A              | nonsynonymous | 1 | 0 |
| TMTC4     | chr13 | 101287132/A//T             | nonsynonymous | 1 | 0 |
| ADCY4     | chr14 | 24787685/G//T              | synonymous    | 1 | 0 |
| TRIM9     | chr14 | 51467448/C//T              | nonsynonymous | 1 | 0 |
| TRIM9     | chr14 | 51467547/C//A              | nonsynonymous | 1 | 0 |
| HIF1A     | chr14 | 62207766/T//G              | synonymous    | 1 | 0 |
| SLC8A3    | chr14 | 70515754/C//A              | nonsynonymous | 1 | 0 |
| SERPINA10 | chr14 | 94750292/G//A              | synonymous    | 1 | 0 |
| SETD3     | chr14 | 99927594/C//T              | nonsynonymous | 1 | 0 |
| AMN       | chr14 | 103390301/C//T             | synonymous    | 1 | 0 |
|           | chr14 | 104151344/C//T             | synonymous    | 1 | 0 |
| ATP10A    | chr15 | 25966967/G//A              | synonymous    | 1 | 0 |
| MAPKBP1   | chr15 | 42067505/G//A              | nonsynonymous | 1 | 0 |
| SPTBN5    | chr15 | 42169084/G//A              | synonymous    | 1 | 0 |
| LARP6     | chr15 | 71124800/G//A              | nonsynonymous | 1 | 0 |
| THSD4     | chr15 | 72069673/G//A              | nonsynonymous | 1 | 0 |
| MYO9A     | chr15 | 72190523/T//C              | nonsynonymous | 1 | 0 |
| ISLR2     | chr15 | 74427076/G//C              | nonsynonymous | 1 | 0 |
| HMG20A    | chr15 | 77750782/G//A              | synonymous    | 1 | 0 |
| EFL1      | chr15 | 82422801/G//A              | synonymous    | 1 | 0 |
| ADAMTSL3  | chr15 | 84611680/C//T              | nonsynonymous | 1 | 0 |
| ZNF710    | chr15 | 90610813/C//T              | synonymous    | 1 | 0 |
| HBM       | chr16 | 216040/A//G                | nonsynonymous | 1 | 0 |
| CEMP1     | chr16 | 2580972/G//T               | nonsynonymous | 1 | 0 |
| SLX4      | chr16 | 3658764/T//G               | nonsynonymous | 1 | 0 |
| PPL       | chr16 | 4943378/A//T               | synonymous    | 1 | 0 |
| EMP2      | chr16 | 10631936/G//A              | synonymous    | 1 | 0 |
| EEF2K     | chr16 | 22295375/A//C              | synonymous    | 1 | 0 |
| ERN2      | chr16 | 23724559/A//T              | synonymous    | 1 | 0 |
| TBC1D10B  | chr16 | 30371102/G//A              | synonymous    | 1 | 0 |
| SRCAP     | chr16 | 30727660/A//T              | nonsynonymous | 1 | 0 |
| SRCAP     | chr16 | 30731580/G//A              | nonsynonymous | 1 | 0 |
| ZNF668    | chr16 | 31075268/G//A              | synonymous    | 1 | 0 |

|          |       |                        |               |   |   |
|----------|-------|------------------------|---------------|---|---|
| ZNF423   | chr16 | 49670198/A//T          | synonymous    | 1 | 0 |
| CETP     | chr16 | 57007295/C//T          | nonsynonymous | 1 | 0 |
| PARD6A   | chr16 | 67696275/G//C          | nonsynonymous | 1 | 0 |
| VAC14    | chr16 | 70820167/C//T          | nonsynonymous | 1 | 0 |
| FOXL1    | chr16 | 86612266/C//T          | synonymous    | 1 | 0 |
| CDH15    | chr16 | 89256813/C//T          | nonsynonymous | 1 | 0 |
| USP6     | chr17 | 5072170/C//T           | nonsynonymous | 1 | 0 |
| KDM6B    | chr17 | 7750200/C//A           | nonsynonymous | 1 | 0 |
| ALOX12B  | chr17 | 7976477/G//A           | nonsynonymous | 1 | 0 |
| MYH3     | chr17 | 10538794/G//C          | synonymous    | 1 | 0 |
| NBR1     | chr17 | 41338330/G//A          | nonsynonymous | 1 | 0 |
| MAPT     | chr17 | 44068843/G//A          | synonymous    | 1 | 0 |
| TBX21    | chr17 | 45822603/C//T          | synonymous    | 1 | 0 |
| TEX14    | chr17 | 56663371/C//A          | nonsynonymous | 1 | 0 |
| INTS2    | chr17 | 60002444/C//T          | nonsynonymous | 1 | 0 |
| ARSG     | chr17 | 66391299/G//A          | nonsynonymous | 1 | 0 |
|          | chr17 | 72667707/G//A          | synonymous    | 1 | 0 |
| NUP85    | chr17 | 73214287/TCTC//T       | nonsynonymous | 1 | 0 |
| CD7      | chr17 | 80274657/C//G          | nonsynonymous | 1 | 0 |
| LPIN2    | chr18 | 2921573/C//T           | synonymous    | 1 | 0 |
| EPB41L3  | chr18 | 5406959/T//A           | nonsynonymous | 1 | 0 |
| LAMA1    | chr18 | 7046328/C//T           | nonsynonymous | 1 | 0 |
| GREB1L   | chr18 | 19032092/A//G          | nonsynonymous | 1 | 0 |
| MEP1B    | chr18 | 29790683/C//A          | synonymous    | 1 | 0 |
| ZNF24    | chr18 | 32920350/C//T          | nonsynonymous | 1 | 0 |
| MISP     | chr19 | 758033/G//A            | nonsynonymous | 1 | 0 |
| EFNA2    | chr19 | 1299902/C//T           | synonymous    | 1 | 0 |
| ATP8B3   | chr19 | 1784913/T//C           | nonsynonymous | 1 | 0 |
| PLIN4    | chr19 | 4510585/T//C           | synonymous    | 1 | 0 |
| RGL3     | chr19 | 11517233/G//A          | synonymous    | 1 | 0 |
| ZNF878   | chr19 | 12155697/A//G          | synonymous    | 1 | 0 |
| CEBPA    | chr19 | 33792754/GGGCGGCGGC//G | nonsynonymous | 1 | 0 |
|          | chr19 | 37487699/G//T          | synonymous    | 1 | 0 |
| ARHGAP35 | chr19 | 47440570/G//A          | nonsynonymous | 1 | 0 |
| CARD8    | chr19 | 48744220/G//A          | nonsynonymous | 1 | 0 |
| PLEKHA4  | chr19 | 49363634/C//T          | nonsynonymous | 1 | 0 |
| VRK3     | chr19 | 50498537/G//A          | synonymous    | 1 | 0 |
| MYH14    | chr19 | 50766645/A//C          | synonymous    | 1 | 0 |
| ZNF845   | chr19 | 53854443/C//T          | nonsynonymous | 1 | 0 |
| A1BG     | chr19 | 58861803/G//A          | synonymous    | 1 | 0 |
| MZF1     | chr19 | 59073457/G//A          | synonymous    | 1 | 0 |
| SIGLEC1  | chr20 | 3678673/C//T           | nonsynonymous | 1 | 0 |
| NAA20    | chr20 | 20013266/C//T          | synonymous    | 1 | 0 |
| FOXA2    | chr20 | 22563310/C//T          | synonymous    | 1 | 0 |
| ZNF335   | chr20 | 44580961/G//A          | nonsynonymous | 1 | 0 |
| EEF1A2   | chr20 | 62126340/G//A          | nonsynonymous | 1 | 0 |
| UCKL1    | chr20 | 62577847/T//C          | nonsynonymous | 1 | 0 |
| TPTE     | chr21 | 10907042/T//G          | nonsynonymous | 1 | 0 |
| PCBP3    | chr21 | 47361674/C//T          | synonymous    | 1 | 0 |
| CLTCL1   | chr22 | 19188972/G//A          | synonymous    | 1 | 0 |
| MORC2    | chr22 | 31330793/G//A          | nonsynonymous | 1 | 0 |
| INPP5J   | chr22 | 31522413/C//A          | synonymous    | 1 | 0 |
| BPIFC    | chr22 | 32853349/G//A          | nonsynonymous | 1 | 0 |
| MYH9     | chr22 | 36681980/C//T          | nonsynonymous | 1 | 0 |
| ENTHD1   | chr22 | 40161360/C//A          | nonsynonymous | 1 | 0 |
| FAM109B  | chr22 | 42474090/T//TGAGTC     | synonymous    | 1 | 0 |
| FBLN1    | chr22 | 45937188/C//T          | synonymous    | 1 | 0 |
| P2RY8    | chrX  | 1584491/G//A           | nonsynonymous | 1 | 0 |
| CLCN4    | chrX  | 10176264/C//T          | synonymous    | 1 | 0 |
| BRWD3    | chrX  | 79965017/A//C          | nonsynonymous | 1 | 0 |
| PCDH19   | chrX  | 99551400/G//A          | nonsynonymous | 1 | 0 |
| GPRASP1  | chrX  | 101912273/C//T         | synonymous    | 1 | 0 |
| SLITRK4  | chrX  | 142718916/C//A         | synonymous    | 1 | 0 |
| ZSWIM5   | chr1  | 45484674/C//A          | nonsynonymous | 1 | 0 |
| DEPDC1   | chr1  | 68948165/A//G          | synonymous    | 1 | 0 |
| MAN1A2   | chr1  | 117957438/C//T         | synonymous    | 1 | 0 |
| FLG2     | chr1  | 152328187/C//G         | nonsynonymous | 1 | 0 |
| RAB1A    | chr2  | 65357067/C//T          | synonymous    | 1 | 0 |
| NEB      | chr2  | 152432785/G//A         | synonymous    | 1 | 0 |
| TTN      | chr2  | 179659227/C//T         | nonsynonymous | 1 | 0 |

|           |       |                     |               |   |   |
|-----------|-------|---------------------|---------------|---|---|
| FBLN2     | chr3  | 13671395/G//A       | nonsynonymous | 1 | 0 |
| PTX3      | chr3  | 157160492/G//A      | synonymous    | 1 | 0 |
| PIK3CA    | chr3  | 178916936/G//A      | nonsynonymous | 1 | 0 |
| CFAP97    | chr4  | 186112021/A//T      | synonymous    | 1 | 0 |
| OSMR      | chr5  | 38925333/T//C       | nonsynonymous | 1 | 0 |
| APC       | chr5  | 112175245/TC//T     | nonsynonymous | 1 | 0 |
| PCDHA11   | chr5  | 140248682/G//A      | synonymous    | 1 | 0 |
| ATP10B    | chr5  | 160047493/G//C      | nonsynonymous | 1 | 0 |
| EXOC2     | chr6  | 598940/C//A         | nonsynonymous | 1 | 0 |
| BEND3     | chr6  | 107391775/G//A      | nonsynonymous | 1 | 0 |
| MUC17     | chr7  | 100681278/A//C      | nonsynonymous | 1 | 0 |
| DOCK4     | chr7  | 111484893/T//C      | nonsynonymous | 1 | 0 |
| MGAM      | chr7  | 141765153/G//A      | synonymous    | 1 | 0 |
| HOOK3     | chr8  | 42823319/A//T       | nonsynonymous | 1 | 0 |
| C8orf34   | chr8  | 69445403/AATTTCT//A | synonymous    | 1 | 0 |
| LOC286238 | chr9  | 91262346/G//T       | synonymous    | 1 | 0 |
| ERCC6     | chr10 | 50669503/G//A       | nonsynonymous | 1 | 0 |
| ACTA2     | chr10 | 90697848/C//T       | synonymous    | 1 | 0 |
| AP5B1     | chr11 | 65545684/G//T       | nonsynonymous | 1 | 0 |
| BCL9L     | chr11 | 118779015/C//CT     | nonsynonymous | 1 | 0 |
| PLCZ1     | chr12 | 18858172/C//A       | nonsynonymous | 1 | 0 |
| WSCD2     | chr12 | 108620832/G//A      | synonymous    | 1 | 0 |
| THSD1     | chr13 | 52952647/C//T       | synonymous    | 1 | 0 |
| RYR3      | chr15 | 33955932/G//T       | nonsynonymous | 1 | 0 |
| DUOX2     | chr15 | 45403675/C//T       | nonsynonymous | 1 | 0 |
| CACNA1G   | chr17 | 48650041/C//T       | synonymous    | 1 | 0 |
| TEX14     | chr17 | 56693619/C//T       | synonymous    | 1 | 0 |
| SLC25A41  | chr19 | 6426476/G//A        | nonsynonymous | 1 | 0 |
| ADGRE5    | chr19 | 14492302/C//G       | synonymous    | 1 | 0 |
| CLPTM1    | chr19 | 45489832/A//G       | synonymous    | 1 | 0 |
| DACT3     | chr19 | 47152167/G//A       | nonsynonymous | 1 | 0 |
| PCSK2     | chr20 | 17462427/C//T       | synonymous    | 1 | 0 |
| ASPHD2    | chr22 | 26830109/G//A       | synonymous    | 1 | 0 |
| ACO2      | chr22 | 41895722/T//C       | synonymous    | 1 | 0 |
| MAPK8IP2  | chr22 | 51042652/C//G       | nonsynonymous | 1 | 0 |
| MAOA      | chrX  | 43595532/G//A       | synonymous    | 1 | 0 |
| MAGEA6    | chrX  | 151869877/G//T      | synonymous    | 1 | 0 |
| ARHGEF10L | chr1  | 18023593/G//A       | synonymous    | 0 | 1 |
| IPO13     | chr1  | 44422877/T//G       | nonsynonymous | 0 | 1 |
| SGIP1     | chr1  | 67199451/C//G       | nonsynonymous | 0 | 1 |
| PKP1      | chr1  | 201282605/T//C      | synonymous    | 0 | 1 |
| SDCCAG8   | chr1  | 243579026/C//G      | nonsynonymous | 0 | 1 |
| BIRC6     | chr2  | 32718730/G//A       | nonsynonymous | 0 | 1 |
| EFEMP1    | chr2  | 56097856/C//A       | nonsynonymous | 0 | 1 |
| AFF3      | chr2  | 100217921/C//T      | synonymous    | 0 | 1 |
| ZNF804A   | chr2  | 185802473/A//C      | nonsynonymous | 0 | 1 |
| PARD3B    | chr2  | 206166358/A//C      | nonsynonymous | 0 | 1 |
| DCBLD2    | chr3  | 98519481/G//C       | nonsynonymous | 0 | 1 |
| DCBLD2    | chr3  | 98519491/T//C       | nonsynonymous | 0 | 1 |
| PDZD2     | chr5  | 32058185/G//A       | nonsynonymous | 0 | 1 |
| NUP155    | chr5  | 37305262/T//TC      | nonsynonymous | 0 | 1 |
|           | chr5  | 141237011/G//A      | synonymous    | 0 | 1 |
| MAGI2     | chr7  | 77885726/A//C       | synonymous    | 0 | 1 |
| CCDC71L   | chr7  | 106301212/C//A      | nonsynonymous | 0 | 1 |
| SAPCD2    | chr9  | 139959012/C//T      | synonymous    | 0 | 1 |
| CDC123    | chr10 | 12280490/T//C       | synonymous    | 0 | 1 |
| LALBA     | chr12 | 48962994/A//C       | nonsynonymous | 0 | 1 |
| NUP37     | chr12 | 102505932/C//A      | nonsynonymous | 0 | 1 |
| COX6A1    | chr12 | 120875976/C//T      | nonsynonymous | 0 | 1 |
| HPD       | chr12 | 122286974/C//T      | nonsynonymous | 0 | 1 |
| GGACT     | chr13 | 101184755/G//A      | nonsynonymous | 0 | 1 |
| CLMN      | chr14 | 95688083/C//T       | nonsynonymous | 0 | 1 |
| ATP2C2    | chr16 | 84456270/C//CG      | nonsynonymous | 0 | 1 |
| FOXF1     | chr16 | 86544988/G//T       | synonymous    | 0 | 1 |
| BRIP1     | chr17 | 59885954/C//G       | synonymous    | 0 | 1 |
| ZNF714    | chr19 | 21300194/C//T       | nonsynonymous | 0 | 1 |
| ZNF765    | chr19 | 53911861/A//T       | synonymous    | 0 | 1 |
| UCKL1     | chr20 | 62571789/A//G       | nonsynonymous | 0 | 1 |
| ZNF182    | chrX  | 47836178/T//C       | synonymous    | 0 | 1 |
| ZMYM3     | chrX  | 70462939/G//A       | synonymous    | 0 | 1 |

|           |       |                          |               |   |   |
|-----------|-------|--------------------------|---------------|---|---|
| CFAP74    | chr1  | 1890563/C//A             | nonsynonymous | 0 | 1 |
| GPSM2     | chr1  | 109440141/G//A           | synonymous    | 0 | 1 |
| AHCYL1    | chr1  | 110560623/G//A           | nonsynonymous | 0 | 1 |
| MCM6      | chr2  | 136626367/C//A           | synonymous    | 0 | 1 |
| EPHA3     | chr3  | 89457240/A//G            | nonsynonymous | 0 | 1 |
| FREM3     | chr4  | 144620845/G//A           | synonymous    | 0 | 1 |
| TLL1      | chr4  | 166963171/T//G           | synonymous    | 0 | 1 |
| C7orf43   | chr7  | 99754476/C//T            | nonsynonymous | 0 | 1 |
| MUC12     | chr7  | 100635850/C//A           | nonsynonymous | 0 | 1 |
| ASZ1      | chr7  | 117067500/C//T           | synonymous    | 0 | 1 |
| JPH1      | chr8  | 75227735/C//T            | nonsynonymous | 0 | 1 |
| MYC       | chr8  | 128750487/G//A           | synonymous    | 0 | 1 |
| RLN1      | chr9  | 5339789/TCAGGACTGCGGCTGC | synonymous    | 0 | 1 |
| NR4A3     | chr9  | 102590882/G//A           | synonymous    | 0 | 1 |
| NFKB2     | chr10 | 104156535/C//T           | synonymous    | 0 | 1 |
| CFAP46    | chr10 | 134705879/C//T           | nonsynonymous | 0 | 1 |
| OR4C16    | chr11 | 55339962/G//A            | nonsynonymous | 0 | 1 |
| LAYN      | chr11 | 111420336/C//T           | synonymous    | 0 | 1 |
| C14orf28  | chr14 | 45369645/A//T            | nonsynonymous | 0 | 1 |
| IFT43     | chr14 | 76488697/C//T            | nonsynonymous | 0 | 1 |
| AHNAK2    | chr14 | 105413407/C//T           | nonsynonymous | 0 | 1 |
| PLCB2     | chr15 | 40591424/G//A            | synonymous    | 0 | 1 |
| TMEM62    | chr15 | 43427838/G//C            | nonsynonymous | 0 | 1 |
| VPS53     | chr17 | 531460/T//C              | synonymous    | 0 | 1 |
| ELOA2     | chr18 | 44560391/G//A            | synonymous    | 0 | 1 |
| ZNF737    | chr19 | 20728011/C//A            | nonsynonymous | 0 | 1 |
| ZNF737    | chr19 | 20728013/T//C            | synonymous    | 0 | 1 |
| ZNF208    | chr19 | 22154511/C//T            | nonsynonymous | 0 | 1 |
| CEACAM16  | chr19 | 45206952/T//C            | nonsynonymous | 0 | 1 |
| GMEB2     | chr20 | 62236139/G//A            | synonymous    | 0 | 1 |
| ZFP92     | chrX  | 152686999/G//T           | synonymous    | 0 | 1 |
| CPSF3L    | chr1  | 1249684/A//G             | nonsynonymous | 0 | 1 |
| SEMA4A    | chr1  | 156127900/G//A           | nonsynonymous | 0 | 1 |
| ZNF678    | chr1  | 227843007/A//T           | nonsynonymous | 0 | 1 |
| HADHB     | chr2  | 26492866/G//A            | nonsynonymous | 0 | 1 |
| PASK      | chr2  | 242066002/G//A           | synonymous    | 0 | 1 |
| PDCD10    | chr3  | 167402146/G//C           | nonsynonymous | 0 | 1 |
| SMCO1     | chr3  | 196234787/C//T           | nonsynonymous | 0 | 1 |
| PCDHGA5   | chr5  | 140745777/G//A           | nonsynonymous | 0 | 1 |
| HIST1H2AG | chr6  | 27101057/C//G            | nonsynonymous | 0 | 1 |
| ZBTB9     | chr6  | 33423989/T//C            | nonsynonymous | 0 | 1 |
| CRIP3     | chr6  | 43273827/G//A            | synonymous    | 0 | 1 |
| PPP1R9A   | chr7  | 94540745/G//A            | synonymous    | 0 | 1 |
| TECPR1    | chr7  | 97860542/A//G            | synonymous    | 0 | 1 |
| MUC17     | chr7  | 100676295/C//T           | nonsynonymous | 0 | 1 |
| EPPK1     | chr8  | 144940620/C//T           | nonsynonymous | 0 | 1 |
| ADARB2    | chr10 | 1405393/C//T             | nonsynonymous | 0 | 1 |
| JMJD1C    | chr10 | 64973827/C//T            | synonymous    | 0 | 1 |
| HELLS     | chr10 | 96336485/C//T            | nonsynonymous | 0 | 1 |
| CFAP58    | chr10 | 106152121/A//T           | nonsynonymous | 0 | 1 |
| FZD4      | chr11 | 86662230/CCT//C          | nonsynonymous | 0 | 1 |
| MIDN      | chr19 | 1257449/C//T             | synonymous    | 0 | 1 |
| PPAN      | chr19 | 10217177/T//C            | nonsynonymous | 0 | 1 |
| RFX1      | chr19 | 14080862/G//A            | synonymous    | 0 | 1 |
| CEP250    | chr20 | 34087961/G//A            | synonymous    | 0 | 1 |
| KRTAP19-1 | chr21 | 31852432/C//A            | nonsynonymous | 0 | 1 |
| IFT27     | chr22 | 37163414/C//T            | synonymous    | 0 | 1 |
| GBP1      | chr1  | 89525071/G//A            | synonymous    | 0 | 1 |
| AGL       | chr1  | 100346636/G//A           | nonsynonymous | 0 | 1 |
| SLC16A4   | chr1  | 110918178/A//G           | synonymous    | 0 | 1 |
| GON4L     | chr1  | 155735502/T//C           | synonymous    | 0 | 1 |
| NFASC     | chr1  | 204943900/G//A           | nonsynonymous | 0 | 1 |
| TTN       | chr2  | 179469438/A//G           | synonymous    | 0 | 1 |
| RAPH1     | chr2  | 204305016/G//A           | nonsynonymous | 0 | 1 |
|           | chr3  | 138426143/A//G           | synonymous    | 0 | 1 |
| PRR23B    | chr3  | 138739416/G//A           | nonsynonymous | 0 | 1 |
| HPF1      | chr4  | 170658831/C//T           | nonsynonymous | 0 | 1 |
| PRR16     | chr5  | 120021946/C//G           | nonsynonymous | 0 | 1 |
| HK3       | chr5  | 176308099/C//T           | nonsynonymous | 0 | 1 |
| LRFN2     | chr6  | 40399758/G//A            | synonymous    | 0 | 1 |

|               |       |                 |               |   |   |
|---------------|-------|-----------------|---------------|---|---|
| PEX6          | chr6  | 42942645/G//A   | synonymous    | 0 | 1 |
| NKX3-1        | chr8  | 23538803/G//A   | synonymous    | 0 | 1 |
| ZMAT4         | chr8  | 40532405/G//A   | nonsynonymous | 0 | 1 |
| LYNX1         | chr8  | 143845995/C//T  | synonymous    | 0 | 1 |
| SNAPC4        | chr9  | 139282287/C//T  | nonsynonymous | 0 | 1 |
| CACNA1B       | chr9  | 141015185/G//A  | nonsynonymous | 0 | 1 |
| PFKFB3        | chr10 | 6265954/C//T    | nonsynonymous | 0 | 1 |
| AGAP5         | chr10 | 75457445/C//T   | synonymous    | 0 | 1 |
| SNCG          | chr10 | 88718492/A//G   | nonsynonymous | 0 | 1 |
| PNLIPRP1      | chr10 | 118355777/G//A  | nonsynonymous | 0 | 1 |
| TMEM258       | chr11 | 61560074/C//T   | synonymous    | 0 | 1 |
| USP28         | chr11 | 113683112/A//G  | nonsynonymous | 0 | 1 |
| MCAM          | chr11 | 119183010/C//T  | synonymous    | 0 | 1 |
| LRRK2         | chr12 | 40715848/C//T   | nonsynonymous | 0 | 1 |
| UHRF1BP1L     | chr12 | 100441959/G//A  | nonsynonymous | 0 | 1 |
| MYH7          | chr14 | 23896796/G//A   | nonsynonymous | 0 | 1 |
| PCK2          | chr14 | 24566162/C//T   | nonsynonymous | 0 | 1 |
| FLRT2         | chr14 | 86088784/A//C   | nonsynonymous | 0 | 1 |
| RYR3          | chr15 | 33876607/C//T   | nonsynonymous | 0 | 1 |
| JMJD7-PLA2G4B | chr15 | 42139597/C//T   | synonymous    | 0 | 1 |
| SRCAP         | chr16 | 30751037/C//T   | nonsynonymous | 0 | 1 |
| PKD1L2        | chr16 | 81201640/G//A   | nonsynonymous | 0 | 1 |
| ENOSF1        | chr18 | 691257/G//A     | nonsynonymous | 0 | 1 |
| POTEC         | chr18 | 14542648/C//A   | nonsynonymous | 0 | 1 |
| SETBP1        | chr18 | 42532776/G//T   | nonsynonymous | 0 | 1 |
| WDR7          | chr18 | 54385199/G//A   | nonsynonymous | 0 | 1 |
| ATCAY         | chr19 | 3907818/G//A    | nonsynonymous | 0 | 1 |
| EEF2          | chr19 | 3983205/G//A    | synonymous    | 0 | 1 |
| DOCK6         | chr19 | 11338085/G//A   | synonymous    | 0 | 1 |
| FAM90A27P     | chr19 | 53787365/C//T   | synonymous    | 0 | 1 |
| DSCAM         | chr21 | 41465775/G//A   | synonymous    | 0 | 1 |
| AJAP1         | chr1  | 4832521/G//A    | nonsynonymous | 0 | 1 |
| FMO2          | chr1  | 171154949/A//G  | nonsynonymous | 0 | 1 |
| ABL2          | chr1  | 179078030/A//G  | nonsynonymous | 0 | 1 |
| THSD7B        | chr2  | 138375963/G//A  | synonymous    | 0 | 1 |
| SLC4A10       | chr2  | 162661051/A//G  | nonsynonymous | 0 | 1 |
| CCR1          | chr3  | 46245808/G//A   | synonymous    | 0 | 1 |
| AMIGO3        | chr3  | 4975551/C//T    | nonsynonymous | 0 | 1 |
| ALDH1L1       | chr3  | 125877280/G//A  | synonymous    | 0 | 1 |
| DNAJC13       | chr3  | 132235626/C//T  | nonsynonymous | 0 | 1 |
|               | chr5  | 58571249/A//G   | synonymous    | 0 | 1 |
| SAP25         | chr7  | 100170337/C//T  | synonymous    | 0 | 1 |
| GLIS3         | chr9  | 4118370/T//C    | nonsynonymous | 0 | 1 |
| FREM1         | chr9  | 14784563/G//A   | nonsynonymous | 0 | 1 |
| EFEMP2        | chr11 | 65635424/C//T   | nonsynonymous | 0 | 1 |
| MON2          | chr12 | 62877952/T//C   | synonymous    | 0 | 1 |
| RAP1B         | chr12 | 69050127/T//A   | nonsynonymous | 0 | 1 |
| ADCK1         | chr14 | 78285410/A//G   | nonsynonymous | 0 | 1 |
| FBN1          | chr15 | 48936846/G//A   | nonsynonymous | 0 | 1 |
| CHRNA4        | chr15 | 78917532/C//T   | synonymous    | 0 | 1 |
| ZNF710        | chr15 | 90610910/G//A   | nonsynonymous | 0 | 1 |
| GALNS         | chr16 | 88907438/C//T   | synonymous    | 0 | 1 |
| MEX3C         | chr18 | 48703397/C//T   | nonsynonymous | 0 | 1 |
| MEGF8         | chr19 | 42860040/C//T   | synonymous    | 0 | 1 |
| ERCC2         | chr19 | 45867073/A//G   | nonsynonymous | 0 | 1 |
| CHD6          | chr20 | 40053922/GCA//G | nonsynonymous | 0 | 1 |
| NFATC2        | chr20 | 50133447/C//T   | nonsynonymous | 0 | 1 |
| IL17RA        | chr22 | 17589328/G//A   | nonsynonymous | 0 | 1 |
| SYNGR1        | chr22 | 39770350/C//T   | synonymous    | 0 | 1 |
| CHI3L2        | chr1  | 111783981/G//A  | synonymous    | 0 | 1 |
| SLC30A3       | chr2  | 27480105/C//T   | nonsynonymous | 0 | 1 |
| AGTR1         | chr3  | 148459397/C//T  | nonsynonymous | 0 | 1 |
| PCDHB5        | chr5  | 140515309/C//T  | nonsynonymous | 0 | 1 |
| PRRC2A        | chr6  | 31595623/T//C   | nonsynonymous | 0 | 1 |
| GLI3          | chr7  | 42004666/C//T   | synonymous    | 0 | 1 |
| BAIAP2L1      | chr7  | 97937129/C//G   | nonsynonymous | 0 | 1 |
| DOCK5         | chr8  | 25198452/T//C   | nonsynonymous | 0 | 1 |
| SAPCD2        | chr9  | 139959999/C//T  | nonsynonymous | 0 | 1 |
| CUBN          | chr10 | 16955909/G//A   | synonymous    | 0 | 1 |
| SFTPA1        | chr10 | 81371729/C//G   | nonsynonymous | 0 | 1 |

|          |       |                 |               |   |   |
|----------|-------|-----------------|---------------|---|---|
| TRHDE    | chr12 | 72666890/C//T   | nonsynonymous | 0 | 1 |
| TMEM255B | chr13 | 114507917/C//T  | synonymous    | 0 | 1 |
| SALL2    | chr14 | 22004995/C//T   | nonsynonymous | 0 | 1 |
| AHNAK2   | chr14 | 105418119/G//C  | nonsynonymous | 0 | 1 |
| AHNAK2   | chr14 | 105418136/C//T  | nonsynonymous | 0 | 1 |
| ITGAM    | chr16 | 31340553/G//T   | nonsynonymous | 0 | 1 |
| SMAD4    | chr18 | 48593520/A//T   | nonsynonymous | 0 | 1 |
| BIRC7    | chr20 | 61870941/G//A   | nonsynonymous | 0 | 1 |
| TRIOBP   | chr22 | 38155256/G//A   | synonymous    | 0 | 1 |
| TLL10    | chr1  | 1115453/A//G    | nonsynonymous | 0 | 1 |
| KDM3B    | chr5  | 137767213/T//C  | nonsynonymous | 0 | 1 |
| ZBED5    | chr11 | 10874389/A//G   | synonymous    | 0 | 1 |
| ENPP7    | chr17 | 77704901/C//T   | synonymous    | 0 | 1 |
| C1orf127 | chr1  | 11007984/T//C   | synonymous    | 0 | 1 |
| LCE2A    | chr1  | 152671571/G//T  | nonsynonymous | 0 | 1 |
| BCL11A   | chr2  | 60780416/G//T   | synonymous    | 0 | 1 |
| PEX13    | chr2  | 61275603/T//C   | synonymous    | 0 | 1 |
| MAP4K4   | chr2  | 102450883/T//C  | nonsynonymous | 0 | 1 |
| LNP1     | chr3  | 100170628/A//G  | synonymous    | 0 | 1 |
| LNP1     | chr3  | 100170634/T//C  | synonymous    | 0 | 1 |
| PCDH18   | chr4  | 138450913/G//A  | nonsynonymous | 0 | 1 |
| FBXW7    | chr4  | 153245429/C//T  | nonsynonymous | 0 | 1 |
| ELOVL7   | chr5  | 60050634/G//A   | synonymous    | 0 | 1 |
| PCDHB1   | chr5  | 140432415/G//A  | nonsynonymous | 0 | 1 |
| SPDL1    | chr5  | 169028581/A//G  | nonsynonymous | 0 | 1 |
| NFKBIE   | chr6  | 44233209/C//T   | nonsynonymous | 0 | 1 |
| COL21A1  | chr6  | 56006630/G//A   | nonsynonymous | 0 | 1 |
| ZDHHC14  | chr6  | 157963680/C//T  | synonymous    | 0 | 1 |
| POU6F2   | chr7  | 39472801/C//T   | synonymous    | 0 | 1 |
| ABCA13   | chr7  | 48391989/C//T   | synonymous    | 0 | 1 |
| APBA1    | chr9  | 72131426/C//T   | nonsynonymous | 0 | 1 |
| PTEN     | chr10 | 89717739/T//TA  | nonsynonymous | 0 | 1 |
| PHC1     | chr12 | 9086467/C//T    | nonsynonymous | 0 | 1 |
| ITPR2    | chr12 | 26733093/A//G   | synonymous    | 0 | 1 |
| RTN1     | chr14 | 60063453/G//A   | synonymous    | 0 | 1 |
| CLMN     | chr14 | 95660927/A//G   | synonymous    | 0 | 1 |
| DNAH2    | chr17 | 7679343/C//T    | nonsynonymous | 0 | 1 |
| PSG2     | chr19 | 43579605/G//T   | nonsynonymous | 0 | 1 |
| CPT1C    | chr19 | 50208269/C//T   | synonymous    | 0 | 1 |
| ARSA     | chr22 | 51064645/T//C   | nonsynonymous | 0 | 1 |
| TSPYL2   | chrX  | 53111715/C//T   | nonsynonymous | 0 | 1 |
| ZBTB38   | chr3  | 141162413/A//G  | nonsynonymous | 0 | 1 |
| PCDHGB4  | chr5  | 140769366/C//T  | nonsynonymous | 0 | 1 |
| NOTCH4   | chr6  | 32185874/G//T   | nonsynonymous | 0 | 1 |
| TBX20    | chr7  | 35242128/G//A   | nonsynonymous | 0 | 1 |
| TBC1D31  | chr8  | 124164138/G//T  | nonsynonymous | 0 | 1 |
| PTK2     | chr8  | 141696754/C//T  | nonsynonymous | 0 | 1 |
| FUBP3    | chr9  | 133511413/C//T  | nonsynonymous | 0 | 1 |
| MRGPRF   | chr11 | 68772827/G//A   | synonymous    | 0 | 1 |
| ARF3     | chr12 | 49333497/T//C   | nonsynonymous | 0 | 1 |
| ZNF26    | chr12 | 133563452/C//T  | nonsynonymous | 0 | 1 |
|          | chr14 | 91360732/C//T   | synonymous    | 0 | 1 |
| ANPEP    | chr15 | 90349291/T//C   | nonsynonymous | 0 | 1 |
| KRT33A   | chr17 | 39503345/G//A   | nonsynonymous | 0 | 1 |
| ZNF208   | chr19 | 22155346/T//C   | synonymous    | 0 | 1 |
| AP2A1    | chr19 | 50305338/T//G   | nonsynonymous | 0 | 1 |
| COL20A1  | chr20 | 61952375/A//G   | nonsynonymous | 0 | 1 |
| AGL      | chr1  | 100379186/G//T  | nonsynonymous | 1 | 0 |
| CEPT1    | chr1  | 111703876/C//T  | nonsynonymous | 1 | 0 |
| CELF3    | chr1  | 151679703/G//T  | nonsynonymous | 1 | 0 |
| KPRP     | chr1  | 152733220/C//A  | synonymous    | 1 | 0 |
| ADAM15   | chr1  | 155026879/A//G  | nonsynonymous | 1 | 0 |
| LMX1A    | chr1  | 165175245/C//A  | nonsynonymous | 1 | 0 |
| CR1      | chr1  | 207796399/A//G  | synonymous    | 1 | 0 |
| LYPLAL1  | chr1  | 219384961/A//T  | nonsynonymous | 1 | 0 |
| OR14I1   | chr1  | 248845401/G//T  | nonsynonymous | 1 | 0 |
| C2orf70  | chr2  | 26798938/G//A   | synonymous    | 1 | 0 |
| EIF5B    | chr2  | 99993088/C//T   | nonsynonymous | 1 | 0 |
| CPS1     | chr2  | 211476870/G//T  | nonsynonymous | 1 | 0 |
| SLC23A3  | chr2  | 220034589/AC//A | nonsynonymous | 1 | 0 |

|          |       |                   |               |   |   |
|----------|-------|-------------------|---------------|---|---|
| COL4A4   | chr2  | 227942718/C//A    | nonsynonymous | 1 | 0 |
| COL4A4   | chr2  | 227942727/C//T    | nonsynonymous | 1 | 0 |
| KLHL30   | chr2  | 239049746/G//T    | synonymous    | 1 | 0 |
| GRM7     | chr3  | 7620401/T//C      | nonsynonymous | 1 | 0 |
| CACNA2D2 | chr3  | 50414974/T//C     | nonsynonymous | 1 | 0 |
| USF3     | chr3  | 113389050/A//G    | nonsynonymous | 1 | 0 |
| DTX3L    | chr3  | 122288740/TC//T   | nonsynonymous | 1 | 0 |
| SLC7A14  | chr3  | 170198241/G//T    | synonymous    | 1 | 0 |
| SLC34A2  | chr4  | 25674867/A//G     | nonsynonymous | 1 | 0 |
| HELQ     | chr4  | 84350691/C//A     | nonsynonymous | 1 | 0 |
| CDKN2AIP | chr4  | 184367519/G//A    | nonsynonymous | 1 | 0 |
| MYO10    | chr5  | 16668494/T//A     | nonsynonymous | 1 | 0 |
| CDH18    | chr5  | 19473767/T//C     | synonymous    | 1 | 0 |
| MCTP1    | chr5  | 94230365/A//G     | synonymous    | 1 | 0 |
| PJA2     | chr5  | 108704383/C//A    | nonsynonymous | 1 | 0 |
| PCDHGA1  | chr5  | 140712160/G//C    | nonsynonymous | 1 | 0 |
| PCDHGA2  | chr5  | 140720256/C//G    | nonsynonymous | 1 | 0 |
| PCDHGA3  | chr5  | 140723858/C//T    | synonymous    | 1 | 0 |
| FAT2     | chr5  | 150945851/A//G    | nonsynonymous | 1 | 0 |
| GMDS     | chr6  | 1961106/G//A      | nonsynonymous | 1 | 0 |
| DPCR1    | chr6  | 30919157/C//G     | nonsynonymous | 1 | 0 |
| HLA-DPB1 | chr6  | 33053609/G//A     | nonsynonymous | 1 | 0 |
| FAM83B   | chr6  | 54804557/G//C     | nonsynonymous | 1 | 0 |
| GPR63    | chr6  | 97246864/G//T     | synonymous    | 1 | 0 |
| ASCC3    | chr6  | 101214507/T//A    | synonymous    | 1 | 0 |
| IL22RA2  | chr6  | 137476112/C//T    | nonsynonymous | 1 | 0 |
| FNDC1    | chr6  | 159654470/G//T    | nonsynonymous | 1 | 0 |
| GRM3     | chr7  | 86493741/T//C     | synonymous    | 1 | 0 |
| SLC25A13 | chr7  | 95761188/G//C     | synonymous    | 1 | 0 |
|          | chr7  | 99672896/C//A     | synonymous    | 1 | 0 |
| DOCK4    | chr7  | 111398834/T//C    | nonsynonymous | 1 | 0 |
| TRPV5    | chr7  | 142612711/T//C    | nonsynonymous | 1 | 0 |
| DLGAP2   | chr8  | 1497624/C//A      | nonsynonymous | 1 | 0 |
| CSMD1    | chr8  | 3076954/C//A      | nonsynonymous | 1 | 0 |
| PRKDC    | chr8  | 48846522/T//A     | synonymous    | 1 | 0 |
| CPSF1    | chr8  | 145634480/G//C    | nonsynonymous | 1 | 0 |
| LMX1B    | chr9  | 129377736/A//T    | nonsynonymous | 1 | 0 |
| NLRP6    | chr11 | 284313/G//C       | nonsynonymous | 1 | 0 |
| MYOD1    | chr11 | 17741493/C//G     | nonsynonymous | 1 | 0 |
| PDHX     | chr11 | 34991723/G//A     | nonsynonymous | 1 | 0 |
| OR5L2    | chr11 | 55594856/G//A     | synonymous    | 1 | 0 |
| PATL1    | chr11 | 59426726/T//C     | nonsynonymous | 1 | 0 |
| PGA5     | chr11 | 61017239/C//A     | nonsynonymous | 1 | 0 |
| TUT1     | chr11 | 62342891/C//T     | nonsynonymous | 1 | 0 |
| KAT5     | chr11 | 65482108/G//A     | nonsynonymous | 1 | 0 |
| MUS81    | chr11 | 65631139/T//A     | nonsynonymous | 1 | 0 |
| SF3B2    | chr11 | 65836262/G//C     | synonymous    | 1 | 0 |
| PC       | chr11 | 66636358/G//A     | synonymous    | 1 | 0 |
| PPP1CA   | chr11 | 67168357/CG//C    | nonsynonymous | 1 | 0 |
| DDX6     | chr11 | 118656787/TTGC//T | nonsynonymous | 1 | 0 |
| PKP2     | chr12 | 33003830/A//G     | synonymous    | 1 | 0 |
| NAV3     | chr12 | 78415564/G//T     | nonsynonymous | 1 | 0 |
| C12orf50 | chr12 | 88379816/T//C     | nonsynonymous | 1 | 0 |
| GAS2L3   | chr12 | 101017586/G//T    | nonsynonymous | 1 | 0 |
| PAN3     | chr13 | 28771473/A//T     | nonsynonymous | 1 | 0 |
| COG3     | chr13 | 46108878/G//T     | synonymous    | 1 | 0 |
| DNAJC3   | chr13 | 96438192/G//T     | nonsynonymous | 1 | 0 |
| NALCN    | chr13 | 101997627/A//C    | nonsynonymous | 1 | 0 |
| SLC12A1  | chr15 | 48521473/C//T     | nonsynonymous | 1 | 0 |
| UBE2Q2   | chr15 | 76152321/C//A     | nonsynonymous | 1 | 0 |
| TARSL2   | chr15 | 102224408/C//A    | nonsynonymous | 1 | 0 |
| PHKB     | chr16 | 47495269/G//T     | nonsynonymous | 1 | 0 |
| CLEC18B  | chr16 | 74455173/C//G     | synonymous    | 1 | 0 |
| KIAA0513 | chr16 | 85120727/A//G     | nonsynonymous | 1 | 0 |
| ZNF469   | chr16 | 88505640/C//G     | nonsynonymous | 1 | 0 |
| ZMYND15  | chr17 | 4644237/G//A      | nonsynonymous | 1 | 0 |
| MYH8     | chr17 | 10317509/A//T     | nonsynonymous | 1 | 0 |
| MYH2     | chr17 | 10427977/T//G     | nonsynonymous | 1 | 0 |
| MYH3     | chr17 | 10535011/G//C     | nonsynonymous | 1 | 0 |
| CDRT15   | chr17 | 14140080/C//G     | nonsynonymous | 1 | 0 |



|           |       |                 |               |   |   |
|-----------|-------|-----------------|---------------|---|---|
| SLC5A10   | chr17 | 18923150/A//G   | nonsynonymous | 1 | 0 |
| KIF18B    | chr17 | 43010313/C//T   | synonymous    | 1 | 0 |
| LPO       | chr17 | 56342245/C//T   | nonsynonymous | 1 | 0 |
| UNC13D    | chr17 | 73836181/G//A   | nonsynonymous | 1 | 0 |
| ZACN      | chr17 | 74075406/T//G   | nonsynonymous | 1 | 0 |
| ZACN      | chr17 | 74075424/T//G   | nonsynonymous | 1 | 0 |
| SPHK1     | chr17 | 74383640/G//A   | synonymous    | 1 | 0 |
| DNAH17    | chr17 | 76571111/T//C   | nonsynonymous | 1 | 0 |
| RPTOR     | chr17 | 78867632/G//T   | nonsynonymous | 1 | 0 |
| ANKRD27   | chr19 | 33137525/G//A   | synonymous    | 1 | 0 |
| PLEKHG2   | chr19 | 39914291/C//T   | nonsynonymous | 1 | 0 |
| FBXO46    | chr19 | 46215814/G//C   | nonsynonymous | 1 | 0 |
| KLK2      | chr19 | 51378077/C//A   | nonsynonymous | 1 | 0 |
| KIR2DL1   | chr19 | 55281308/G//T   | synonymous    | 1 | 0 |
| ACSS1     | chr20 | 24994676/G//A   | nonsynonymous | 1 | 0 |
| PHACTR3   | chr20 | 58348392/C//A   | synonymous    | 1 | 0 |
| BIRC7     | chr20 | 61867694/C//A   | synonymous    | 1 | 0 |
| ADAMTS5   | chr21 | 28305319/C//T   | synonymous    | 1 | 0 |
| U2AF1L5   | chr21 | 44524456/G//A   | nonsynonymous | 1 | 0 |
| C22orf29  | chr22 | 19839350/G//T   | synonymous    | 1 | 0 |
| SGSM1     | chr22 | 25308632/C//T   | synonymous    | 1 | 0 |
| KIAA1671  | chr22 | 25437223/C//T   | nonsynonymous | 1 | 0 |
| SEC14L2   | chr22 | 30803506/T//C   | nonsynonymous | 1 | 0 |
| SHOX      | chrX  | 595558/G//T     | synonymous    | 1 | 0 |
| RBM10     | chrX  | 47044971/G//T   | nonsynonymous | 1 | 0 |
| PHF8      | chrX  | 53964525/G//A   | synonymous    | 1 | 0 |
| F9        | chrX  | 138619263/G//A  | synonymous    | 1 | 0 |
| PRDM16    | chr1  | 3328690/C//T    | synonymous    | 0 | 1 |
| UBE4B     | chr1  | 10195238/G//GAA | nonsynonymous | 0 | 1 |
| ELOVL1    | chr1  | 43830094/G//A   | synonymous    | 0 | 1 |
| KLF17     | chr1  | 44595254/C//T   | nonsynonymous | 0 | 1 |
| BARHL2    | chr1  | 91182225/G//A   | synonymous    | 0 | 1 |
| TRIM33    | chr1  | 114944006/C//G  | synonymous    | 0 | 1 |
| PLEKHA6   | chr1  | 204226980/G//C  | nonsynonymous | 0 | 1 |
| GKN1      | chr2  | 69201706/T//A   | synonymous    | 0 | 1 |
| DNAH6     | chr2  | 84774502/C//T   | synonymous    | 0 | 1 |
| ELMOD3    | chr2  | 85617353/G//A   | nonsynonymous | 0 | 1 |
| SNRNP200  | chr2  | 96956422/C//T   | synonymous    | 0 | 1 |
| MYO7B     | chr2  | 128384823/C//G  | nonsynonymous | 0 | 1 |
| UGGT1     | chr2  | 128938499/C//T  | synonymous    | 0 | 1 |
| SCN9A     | chr2  | 167134663/C//G  | nonsynonymous | 0 | 1 |
| ITGA4     | chr2  | 182322985/C//T  | nonsynonymous | 0 | 1 |
| ANO7      | chr2  | 242135264/C//T  | synonymous    | 0 | 1 |
| ARPC4     | chr3  | 9847973/C//T    | synonymous    | 0 | 1 |
| DYNC1LI1  | chr3  | 32582581/G//A   | nonsynonymous | 0 | 1 |
| PDE12     | chr3  | 57542128/C//T   | nonsynonymous | 0 | 1 |
| CBLB      | chr3  | 105423021/G//T  | synonymous    | 0 | 1 |
| USP13     | chr3  | 179458118/A//G  | synonymous    | 0 | 1 |
| JAKMIP1   | chr4  | 6107415/G//A    | nonsynonymous | 0 | 1 |
| SGCB      | chr4  | 52894246/C//G   | nonsynonymous | 0 | 1 |
| TMPRSS11D | chr4  | 68719895/G//T   | nonsynonymous | 0 | 1 |
| STBD1     | chr4  | 77231103/G//T   | nonsynonymous | 0 | 1 |
| SLC9B2    | chr4  | 103949940/A//G  | synonymous    | 0 | 1 |
| SEC24D    | chr4  | 119665298/G//A  | nonsynonymous | 0 | 1 |
| NPY1R     | chr4  | 164247692/T//C  | synonymous    | 0 | 1 |
| NPY1R     | chr4  | 164247697/T//G  | nonsynonymous | 0 | 1 |
| TMEM192   | chr4  | 166021955/G//C  | nonsynonymous | 0 | 1 |
| CDK7      | chr5  | 68555645/G//C   | nonsynonymous | 0 | 1 |
| TAF9      | chr5  | 68661256/A//C   | synonymous    | 0 | 1 |
| VCAN      | chr5  | 82832940/C//T   | nonsynonymous | 0 | 1 |
| PCDHB11   | chr5  | 140581797/T//C  | synonymous    | 0 | 1 |
| DUSP1     | chr5  | 172195881/C//T  | nonsynonymous | 0 | 1 |
| KIAA1191  | chr5  | 175777715/A//G  | synonymous    | 0 | 1 |
| IRF4      | chr6  | 395840/C//T     | synonymous    | 0 | 1 |
|           | chr6  | 5144453/C//T    | synonymous    | 0 | 1 |
| MED20     | chr6  | 41877176/A//C   | nonsynonymous | 0 | 1 |
| TTBK1     | chr6  | 43230894/C//T   | nonsynonymous | 0 | 1 |
| PKHD1     | chr6  | 51920455/C//T   | nonsynonymous | 0 | 1 |
| HCRTR2    | chr6  | 55128625/A//C   | synonymous    | 0 | 1 |
| EYS       | chr6  | 64431459/A//T   | nonsynonymous | 0 | 1 |

|              |       |                 |               |   |   |
|--------------|-------|-----------------|---------------|---|---|
| LAMA2        | chr6  | 129775418/G//A  | nonsynonymous | 0 | 1 |
| ADCY1        | chr7  | 45717527/C//T   | synonymous    | 0 | 1 |
| MUC17        | chr7  | 100684125/A//G  | nonsynonymous | 0 | 1 |
| EPHB6        | chr7  | 142568072/C//T  | nonsynonymous | 0 | 1 |
| NEFM         | chr8  | 24771311/G//C   | nonsynonymous | 0 | 1 |
| PLAT         | chr8  | 42033531/G//A   | nonsynonymous | 0 | 1 |
| SOX17        | chr8  | 55370939/G//T   | nonsynonymous | 0 | 1 |
| VPS13B       | chr8  | 100833581/A//T  | synonymous    | 0 | 1 |
| RIMS2        | chr8  | 104897758/G//C  | nonsynonymous | 0 | 1 |
| COL27A1      | chr9  | 117044776/G//A  | nonsynonymous | 0 | 1 |
| SHOC2        | chr10 | 112767291/C//G  | nonsynonymous | 0 | 1 |
| TCERG1L      | chr10 | 133058540/G//A  | nonsynonymous | 0 | 1 |
| KNDC1        | chr10 | 135009284/C//T  | nonsynonymous | 0 | 1 |
| OR52J3       | chr11 | 5068646/C//A    | synonymous    | 0 | 1 |
| CSTF3        | chr11 | 33106637/C//T   | nonsynonymous | 0 | 1 |
| DDB1         | chr11 | 61069791/C//G   | synonymous    | 0 | 1 |
| ESRRA        | chr11 | 64074913/G//A   | nonsynonymous | 0 | 1 |
| CD163L1      | chr12 | 7519901/C//T    | nonsynonymous | 0 | 1 |
| PRH1-TAS2R14 | chr12 | 11091072/C//A   | synonymous    | 0 | 1 |
| HECTD4       | chr12 | 112600304/G//A  | nonsynonymous | 0 | 1 |
| ADGRD1       | chr12 | 131490558/T//C  | nonsynonymous | 0 | 1 |
| TEX26        | chr13 | 31540449/A//G   | nonsynonymous | 0 | 1 |
| PCDH9        | chr13 | 66878829/T//C   | synonymous    | 0 | 1 |
| PCDH9        | chr13 | 67801069/C//A   | nonsynonymous | 0 | 1 |
| SLC10A2      | chr13 | 103705040/A//T  | nonsynonymous | 0 | 1 |
| BTBD7        | chr14 | 93712396/A//C   | nonsynonymous | 0 | 1 |
| OR4N4        | chr15 | 22383353/T//A   | nonsynonymous | 0 | 1 |
| TGM5         | chr15 | 43552352/C//T   | nonsynonymous | 0 | 1 |
| VWA9         | chr15 | 65903475/T//G   | nonsynonymous | 0 | 1 |
| UBE2Q2       | chr15 | 76165911/T//G   | nonsynonymous | 0 | 1 |
| KIAA0556     | chr16 | 27732876/T//G   | synonymous    | 0 | 1 |
| TRPV1        | chr17 | 3475439/C//A    | nonsynonymous | 0 | 1 |
| TP53         | chr17 | 7577556/C//T    | nonsynonymous | 0 | 1 |
| RANGRF       | chr17 | 8192147/T//C    | nonsynonymous | 0 | 1 |
| MIEN1        | chr17 | 37886737/C//T   | synonymous    | 0 | 1 |
| HEATR6       | chr17 | 58121048/C//T   | nonsynonymous | 0 | 1 |
| HELZ         | chr17 | 65212007/A//C   | synonymous    | 0 | 1 |
| DNAH17       | chr17 | 76450734/G//A   | synonymous    | 0 | 1 |
| PLPP2        | chr19 | 281377/G//A     | synonymous    | 0 | 1 |
| RNF126       | chr19 | 649678/C//G     | nonsynonymous | 0 | 1 |
| HOOK2        | chr19 | 12874192/C//G   | nonsynonymous | 0 | 1 |
| ADGRL1       | chr19 | 14263204/C//T   | nonsynonymous | 0 | 1 |
| FAM129C      | chr19 | 17650170/G//C   | synonymous    | 0 | 1 |
| CCNE1        | chr19 | 30312932/T//A   | synonymous    | 0 | 1 |
| ZNF569       | chr19 | 37904944/T//G   | synonymous    | 0 | 1 |
| CEACAM19     | chr19 | 45175243/A//G   | nonsynonymous | 0 | 1 |
| RSPH6A       | chr19 | 46299073/C//G   | synonymous    | 0 | 1 |
| MYBPC2       | chr19 | 50939377/C//T   | nonsynonymous | 0 | 1 |
| RDH13        | chr19 | 55558828/G//C   | nonsynonymous | 0 | 1 |
| ZNF671       | chr19 | 58231972/G//A   | synonymous    | 0 | 1 |
| FASTKD5      | chr20 | 3127774/G//C    | nonsynonymous | 0 | 1 |
| ADRA1D       | chr20 | 4202749/C//T    | synonymous    | 0 | 1 |
| TRPC4AP      | chr20 | 33592341/C//T   | nonsynonymous | 0 | 1 |
| PTPRT        | chr20 | 41306736/T//G   | nonsynonymous | 0 | 1 |
| WFDC5        | chr20 | 43738592/G//A   | synonymous    | 0 | 1 |
| SLC2A10      | chr20 | 45354651/G//A   | nonsynonymous | 0 | 1 |
| NFATC2       | chr20 | 50140054/G//A   | synonymous    | 0 | 1 |
| TSHZ2        | chr20 | 51870291/C//T   | synonymous    | 0 | 1 |
| LOC102724428 | chr21 | 44837507/G//A   | nonsynonymous | 0 | 1 |
| GTSE1        | chr22 | 46709786/G//A   | nonsynonymous | 0 | 1 |
| USP9X        | chrX  | 41031097/T//C   | nonsynonymous | 0 | 1 |
| MAGED2       | chrX  | 54837359/C//T   | nonsynonymous | 0 | 1 |
| ATP11C       | chrX  | 138871574/T//TC | nonsynonymous | 0 | 1 |
| L1CAM        | chrX  | 153129882/T//C  | nonsynonymous | 0 | 1 |
| KLHDC7A      | chr1  | 18809442/G//A   | nonsynonymous | 0 | 1 |
| CSF1         | chr1  | 110466468/C//T  | nonsynonymous | 0 | 1 |
| SETDB1       | chr1  | 150933325/G//A  | synonymous    | 0 | 1 |
| DCST2        | chr1  | 154999106/C//T  | synonymous    | 0 | 1 |
| KLHL12       | chr1  | 202880263/T//C  | synonymous    | 0 | 1 |
| FBXO28       | chr1  | 224302099/G//A  | nonsynonymous | 0 | 1 |

|          |       |                |               |   |   |
|----------|-------|----------------|---------------|---|---|
| ADI1     | chr2  | 3502803/C//T   | synonymous    | 0 | 1 |
| THADA    | chr2  | 43819540/G//T  | synonymous    | 0 | 1 |
| ETAA1    | chr2  | 67624760/G//A  | synonymous    | 0 | 1 |
|          | chr2  | 163279775/G//A | synonymous    | 0 | 1 |
| FIGN     | chr2  | 164467524/G//A | nonsynonymous | 0 | 1 |
| CCDC150  | chr2  | 197559888/G//A | synonymous    | 0 | 1 |
| GRIP2    | chr3  | 14536452/C//T  | nonsynonymous | 0 | 1 |
| CCR4     | chr3  | 32995178/C//T  | synonymous    | 0 | 1 |
| SCN11A   | chr3  | 38888976/C//T  | nonsynonymous | 0 | 1 |
| NICN1    | chr3  | 49463806/C//T  | nonsynonymous | 0 | 1 |
| ZBTB11   | chr3  | 101378824/T//G | nonsynonymous | 0 | 1 |
| ATR      | chr3  | 142281185/G//T | nonsynonymous | 0 | 1 |
| AADACL2  | chr3  | 151474834/C//T | nonsynonymous | 0 | 1 |
| KIT      | chr4  | 55592200/T//C  | synonymous    | 0 | 1 |
| ADAMTS3  | chr4  | 73175190/C//A  | nonsynonymous | 0 | 1 |
| PPEF2    | chr4  | 76794329/C//T  | nonsynonymous | 0 | 1 |
| FBXL7    | chr5  | 15937113/C//T  | nonsynonymous | 0 | 1 |
| SPEF2    | chr5  | 35704734/A//G  | nonsynonymous | 0 | 1 |
| APC      | chr5  | 112164586/C//T | nonsynonymous | 0 | 1 |
| PCDHA9   | chr5  | 140229947/C//T | nonsynonymous | 0 | 1 |
| PCDHA13  | chr5  | 140264052/G//A | synonymous    | 0 | 1 |
| PCDHB8   | chr5  | 140558899/G//T | synonymous    | 0 | 1 |
| PCDHGA8  | chr5  | 140774124/G//A | nonsynonymous | 0 | 1 |
| PCDHGB5  | chr5  | 140779299/G//A | synonymous    | 0 | 1 |
| GRM6     | chr5  | 178410141/C//T | nonsynonymous | 0 | 1 |
| TBC1D9B  | chr5  | 179318427/G//A | synonymous    | 0 | 1 |
| WRNIP1   | chr6  | 2783720/G//A   | nonsynonymous | 0 | 1 |
| SIM1     | chr6  | 100838544/C//T | nonsynonymous | 0 | 1 |
| HECA     | chr6  | 139487600/G//A | nonsynonymous | 0 | 1 |
| UTRN     | chr6  | 144852241/A//G | nonsynonymous | 0 | 1 |
| POM121   | chr7  | 72416150/G//C  | synonymous    | 0 | 1 |
| BUD31    | chr7  | 99008704/T//G  | synonymous    | 0 | 1 |
| SH2B2    | chr7  | 101943925/G//A | nonsynonymous | 0 | 1 |
| SSPO     | chr7  | 149521649/C//T | synonymous    | 0 | 1 |
| RP1      | chr8  | 55538827/C//A  | synonymous    | 0 | 1 |
| ADGRB1   | chr8  | 143557999/C//T | nonsynonymous | 0 | 1 |
| RECQL4   | chr8  | 145738405/C//T | synonymous    | 0 | 1 |
| C9orf72  | chr9  | 27567114/G//A  | nonsynonymous | 0 | 1 |
| TMC1     | chr9  | 75387463/C//T  | synonymous    | 0 | 1 |
| COL15A1  | chr9  | 101797707/C//A | synonymous    | 0 | 1 |
| NSMF     | chr9  | 140348257/C//T | nonsynonymous | 0 | 1 |
| LARP4B   | chr10 | 875655/T//C    | nonsynonymous | 0 | 1 |
| ARHGAP21 | chr10 | 24874763/C//T  | synonymous    | 0 | 1 |
| RAB6A    | chr11 | 73471723/C//G  | synonymous    | 0 | 1 |
| TENM4    | chr11 | 78614377/C//T  | nonsynonymous | 0 | 1 |
| FAT3     | chr11 | 92086867/C//T  | nonsynonymous | 0 | 1 |
| CD163    | chr12 | 7653830/C//T   | nonsynonymous | 0 | 1 |
| TAS2R19  | chr12 | 11174253/G//C  | synonymous    | 0 | 1 |
| TM7SF3   | chr12 | 27149722/G//T  | nonsynonymous | 0 | 1 |
| CEP290   | chr12 | 88508240/C//A  | nonsynonymous | 0 | 1 |
| NALCN    | chr13 | 101742266/C//T | synonymous    | 0 | 1 |
| NALCN    | chr13 | 101763480/G//A | nonsynonymous | 0 | 1 |
| ADCY4    | chr14 | 24795549/C//G  | nonsynonymous | 0 | 1 |
| MDGA2    | chr14 | 47770692/G//A  | synonymous    | 0 | 1 |
| HSPA2    | chr14 | 65008263/C//T  | synonymous    | 0 | 1 |
| SPTB     | chr14 | 65239526/C//T  | synonymous    | 0 | 1 |
| KCNK10   | chr14 | 88707049/A//G  | nonsynonymous | 0 | 1 |
| SERPINA4 | chr14 | 95030071/G//A  | synonymous    | 0 | 1 |
| NPAP1    | chr15 | 24921625/G//A  | nonsynonymous | 0 | 1 |
| EMC4     | chr15 | 34519894/C//T  | nonsynonymous | 0 | 1 |
| DET1     | chr15 | 89074729/G//A  | nonsynonymous | 0 | 1 |
| CHSY1    | chr15 | 101718073/T//C | synonymous    | 0 | 1 |
| ST3GAL2  | chr16 | 70422430/C//T  | nonsynonymous | 0 | 1 |
| HYDIN    | chr16 | 70952256/G//A  | nonsynonymous | 0 | 1 |
| ZNF469   | chr16 | 88501038/G//A  | nonsynonymous | 0 | 1 |
| VTN      | chr17 | 26694784/C//T  | nonsynonymous | 0 | 1 |
| SCRN2    | chr17 | 45915942/G//A  | nonsynonymous | 0 | 1 |
| TTLL6    | chr17 | 46882326/G//A  | nonsynonymous | 0 | 1 |
| TMEM94   | chr17 | 73495353/C//T  | nonsynonymous | 0 | 1 |
| APBA3    | chr19 | 3752566/G//A   | synonymous    | 0 | 1 |

|          |       |                          |               |   |   |
|----------|-------|--------------------------|---------------|---|---|
| ARHGEF18 | chr19 | 7523547/G//C             | nonsynonymous | 0 | 1 |
| ZNF559   | chr19 | 9449894/C//G             | nonsynonymous | 0 | 1 |
| MAST3    | chr19 | 18260384/C//T            | nonsynonymous | 0 | 1 |
| ZNF430   | chr19 | 21240355/C//T            | nonsynonymous | 0 | 1 |
| ZNF729   | chr19 | 22497472/C//A            | nonsynonymous | 0 | 1 |
| ZNF536   | chr19 | 30934537/G//C            | nonsynonymous | 0 | 1 |
|          | chr19 | 37487807/C//A            | synonymous    | 0 | 1 |
| ERICH4   | chr19 | 41950106/C//T            | nonsynonymous | 0 | 1 |
| SLC6A16  | chr19 | 49812370/G//A            | nonsynonymous | 0 | 1 |
| LRRC4B   | chr19 | 51021572/G//A            | synonymous    | 0 | 1 |
| TNNI3    | chr19 | 55667601/C//G            | nonsynonymous | 0 | 1 |
| CHGB     | chr20 | 5903187/C//T             | nonsynonymous | 0 | 1 |
| CPNE1    | chr20 | 34214650/C//T            | nonsynonymous | 0 | 1 |
| LAMA5    | chr20 | 60912702/G//A            | nonsynonymous | 0 | 1 |
| SOX18    | chr20 | 62679445/G//A            | synonymous    | 0 | 1 |
| PSMG1    | chr21 | 40550578/CAT//C          | synonymous    | 0 | 1 |
| MX1      | chr21 | 42818018/G//A            | nonsynonymous | 0 | 1 |
| PCBP3    | chr21 | 47361645/G//A            | synonymous    | 0 | 1 |
| TTC28    | chr22 | 28702592/G//A            | nonsynonymous | 0 | 1 |
| ASCC2    | chr22 | 30184977/C//T            | synonymous    | 0 | 1 |
| LARGE1   | chr22 | 33673142/C//T            | synonymous    | 0 | 1 |
| PNPLA5   | chr22 | 44276620/G//T            | synonymous    | 0 | 1 |
| SPANXD   | chrX  | 140785688/T//G           | nonsynonymous | 0 | 1 |
| TARDBP   | chr1  | 11082266/A//G            | nonsynonymous | 1 | 0 |
| SNIP1    | chr1  | 38019815/T//C            | nonsynonymous | 1 | 0 |
| KIAA0754 | chr1  | 39876785/G//A            | nonsynonymous | 1 | 0 |
| CD53     | chr1  | 111434097/A//T           | synonymous    | 1 | 0 |
| SPRR2E   | chr1  | 153066078/G//A           | synonymous    | 1 | 0 |
| FCRL3    | chr1  | 157668419/C//T           | nonsynonymous | 1 | 0 |
| USH2A    | chr1  | 216173745/T//A           | nonsynonymous | 1 | 0 |
| PSEN2    | chr1  | 227079037/C//A           | synonymous    | 1 | 0 |
| THADA    | chr2  | 43798965/T//A            | nonsynonymous | 1 | 0 |
| NAT8B    | chr2  | 73928403/C//T            | synonymous    | 1 | 0 |
| LRP1B    | chr2  | 141458092/C//A           | nonsynonymous | 1 | 0 |
| LRP2     | chr2  | 170068492/G//A           | nonsynonymous | 1 | 0 |
| NFE2L2   | chr2  | 178098969/G//T           | nonsynonymous | 1 | 0 |
| TTN      | chr2  | 179464408/T//G           | nonsynonymous | 1 | 0 |
| TTN      | chr2  | 179585928/T//A           | nonsynonymous | 1 | 0 |
|          | chr2  | 219188033/G//A           | synonymous    | 1 | 0 |
| TBC1D5   | chr3  | 17333470/A//T            | nonsynonymous | 1 | 0 |
| FAM208A  | chr3  | 56657753/T//C            | synonymous    | 1 | 0 |
| COL6A5   | chr3  | 130116760/G//T           | nonsynonymous | 1 | 0 |
| MBNL1    | chr3  | 152163154/T//C           | synonymous    | 1 | 0 |
| RAP2B    | chr3  | 152881045/GCGCGCCGCCGCCG | synonymous    | 1 | 0 |
| TP63     | chr3  | 189582020/G//A           | nonsynonymous | 1 | 0 |
| HTT      | chr4  | 3158865/A//G             | nonsynonymous | 1 | 0 |
| KDR      | chr4  | 55964358/G//A            | nonsynonymous | 1 | 0 |
| CTNND2   | chr5  | 11411745/T//C            | synonymous    | 1 | 0 |
| LNPEP    | chr5  | 96364105/G//A            | nonsynonymous | 1 | 0 |
| UBTD2    | chr5  | 171661207/C//A           | nonsynonymous | 1 | 0 |
| DSP      | chr6  | 7584497/A//G             | synonymous    | 1 | 0 |
| HIST1H3J | chr6  | 27858366/G//A            | nonsynonymous | 1 | 0 |
| PRPH2    | chr6  | 42666108/A//G            | synonymous    | 1 | 0 |
| CEP162   | chr6  | 84913736/T//A            | nonsynonymous | 1 | 0 |
| RSPO3    | chr6  | 127476479/G//T           | nonsynonymous | 1 | 0 |
| SLC2A12  | chr6  | 134350441/C//T           | nonsynonymous | 1 | 0 |
| UPK3B    | chr7  | 76143298/G//T            | nonsynonymous | 1 | 0 |
| NCAPG2   | chr7  | 158486067/C//T           | synonymous    | 1 | 0 |
| CSMD1    | chr8  | 3047488/G//C             | nonsynonymous | 1 | 0 |
| KHDRBS3  | chr8  | 136594216/G//C           | nonsynonymous | 1 | 0 |
| ELAVL2   | chr9  | 23761997/T//C            | synonymous    | 1 | 0 |
| DOLK     | chr9  | 131709597/G//C           | synonymous    | 1 | 0 |
| SORCS1   | chr10 | 108459131/G//A           | synonymous    | 1 | 0 |
| TNNI2    | chr11 | 1862698/C//T             | nonsynonymous | 1 | 0 |
| CHRNA10  | chr11 | 3690513/C//A             | nonsynonymous | 1 | 0 |
| OR52D1   | chr11 | 5510070/A//G             | nonsynonymous | 1 | 0 |
| NADSYN1  | chr11 | 71189473/C//T            | synonymous    | 1 | 0 |
| KRT4     | chr12 | 53207386/C//T            | nonsynonymous | 1 | 0 |
| SLC16A7  | chr12 | 60098658/G//C            | nonsynonymous | 1 | 0 |
| BEST3    | chr12 | 70049528/T//C            | nonsynonymous | 1 | 0 |

|           |       |                        |               |   |   |
|-----------|-------|------------------------|---------------|---|---|
| PPP1R12A  | chr12 | 80199379/T//C          | nonsynonymous | 1 | 0 |
| UTP20     | chr12 | 101674936/A//C         | nonsynonymous | 1 | 0 |
| ZNF84     | chr12 | 133633903/G//C         | nonsynonymous | 1 | 0 |
| UFM1      | chr13 | 38924148/C//G          | synonymous    | 1 | 0 |
| OR4K17    | chr14 | 20586282/G//A          | synonymous    | 1 | 0 |
| TRIP11    | chr14 | 92470402/T//A          | nonsynonymous | 1 | 0 |
| ATP6V0D1  | chr16 | 67472364/GCA//G        | synonymous    | 1 | 0 |
| NFATC3    | chr16 | 68225364/C//T          | nonsynonymous | 1 | 0 |
| MYH4      | chr17 | 10368822/G//A          | nonsynonymous | 1 | 0 |
| MYO19     | chr17 | 34867247/G//A          | synonymous    | 1 | 0 |
| GJD3      | chr17 | 38519387/G//A          | synonymous    | 1 | 0 |
| KRTAP4-8  | chr17 | 39254142/A//G          | synonymous    | 1 | 0 |
| MPP2      | chr17 | 41981858/TCTCCTGGAG//T | nonsynonymous | 1 | 0 |
| MTCL1     | chr18 | 8783701/C//T           | synonymous    | 1 | 0 |
| APBA3     | chr19 | 3751324/A//G           | nonsynonymous | 1 | 0 |
| VMAC      | chr19 | 5909108/G//A           | synonymous    | 1 | 0 |
| MLLT1     | chr19 | 6227019/G//A           | nonsynonymous | 1 | 0 |
| FAM187B   | chr19 | 35715900/T//A          | nonsynonymous | 1 | 0 |
| HIPK4     | chr19 | 40886982/G//A          | nonsynonymous | 1 | 0 |
| C19orf54  | chr19 | 41248607/A//G          | nonsynonymous | 1 | 0 |
| FBXO46    | chr19 | 46216077/C//T          | nonsynonymous | 1 | 0 |
| ARHGAP35  | chr19 | 47440632/A//T          | nonsynonymous | 1 | 0 |
| LILRA5    | chr19 | 54818795/C//T          | nonsynonymous | 1 | 0 |
| ATRN      | chr20 | 3557645/G//A           | nonsynonymous | 1 | 0 |
| SNX21     | chr20 | 44469994/C//T          | synonymous    | 1 | 0 |
| DIDO1     | chr20 | 61538658/C//A          | synonymous    | 1 | 0 |
| RUNX1     | chr21 | 36259134/C//T          | synonymous    | 1 | 0 |
| BRWD1     | chr21 | 40559045/G//A          | synonymous    | 1 | 0 |
| THAP7     | chr22 | 21356176/C//T          | nonsynonymous | 1 | 0 |
| TLR8      | chrX  | 12937291/A//T          | synonymous    | 1 | 0 |
| ACTRT2    | chr1  | 2939042/C//T           | synonymous    | 1 | 0 |
| MAN1C1    | chr1  | 26104704/G//A          | nonsynonymous | 1 | 0 |
| PTPRU     | chr1  | 29587363/C//T          | synonymous    | 1 | 0 |
| CSMD2     | chr1  | 34052741/G//A          | nonsynonymous | 1 | 0 |
| HPDL      | chr1  | 45793826/T//TTC        | nonsynonymous | 1 | 0 |
| MROH7     | chr1  | 55144480/C//T          | nonsynonymous | 1 | 0 |
| CD5L      | chr1  | 157804407/G//A         | nonsynonymous | 1 | 0 |
| SPTA1     | chr1  | 158612287/G//A         | nonsynonymous | 1 | 0 |
| OR2T4     | chr1  | 248525275/G//T         | nonsynonymous | 1 | 0 |
| GREB1     | chr2  | 11774474/C//T          | nonsynonymous | 1 | 0 |
| SPAST     | chr2  | 32289188/G//A          | synonymous    | 1 | 0 |
| BIRC6     | chr2  | 32626290/A//ATG        | nonsynonymous | 1 | 0 |
| KCNK12    | chr2  | 47748369/C//T          | nonsynonymous | 1 | 0 |
| GLI2      | chr2  | 121747048/C//CG        | nonsynonymous | 1 | 0 |
| KYNU      | chr2  | 143798027/C//T         | nonsynonymous | 1 | 0 |
| KCNE4     | chr2  | 223917884/G//A         | synonymous    | 1 | 0 |
| COLQ      | chr3  | 15520497/C//T          | nonsynonymous | 1 | 0 |
| PBRM1     | chr3  | 52637555/G//A          | nonsynonymous | 1 | 0 |
| ROBO2     | chr3  | 77147279/C//T          | nonsynonymous | 1 | 0 |
| OR5H6     | chr3  | 97983658/C//A          | nonsynonymous | 1 | 0 |
| COL8A1    | chr3  | 99509727/C//A          | synonymous    | 1 | 0 |
| MED12L    | chr3  | 151078286/C//T         | synonymous    | 1 | 0 |
| TMPRSS11A | chr4  | 68784770/A//T          | synonymous    | 1 | 0 |
| MAPK10    | chr4  | 86938374/C//T          | synonymous    | 1 | 0 |
| NFKB1     | chr4  | 103527722/G//A         | nonsynonymous | 1 | 0 |
| FAM134B   | chr5  | 16474917/T//C          | nonsynonymous | 1 | 0 |
| ARSB      | chr5  | 78181573/C//T          | nonsynonymous | 1 | 0 |
| MEGF10    | chr5  | 126732462/C//T         | synonymous    | 1 | 0 |
|           | chr5  | 131534058/C//T         | synonymous    | 1 | 0 |
| PCDHGA6   | chr5  | 140755848/C//T         | nonsynonymous | 1 | 0 |
| GABRA1    | chr5  | 161277795/T//C         | synonymous    | 1 | 0 |
| PLA2G7    | chr6  | 46684223/G//A          | nonsynonymous | 1 | 0 |
| TBX18     | chr6  | 85446668/G//C          | nonsynonymous | 1 | 0 |
| GRM1      | chr6  | 146720509/C//T         | synonymous    | 1 | 0 |
| MIOS      | chr7  | 7612552/G//T           | nonsynonymous | 1 | 0 |
| FERD3L    | chr7  | 19184766/C//T          | nonsynonymous | 1 | 0 |
| GLI3      | chr7  | 42004329/C//T          | nonsynonymous | 1 | 0 |
| COBL      | chr7  | 51111322/C//T          | synonymous    | 1 | 0 |
|           | chr8  | 31498184/C//T          | synonymous    | 1 | 0 |
| RUNX1T1   | chr8  | 93004052/G//C          | nonsynonymous | 1 | 0 |

|           |       |                |               |   |   |
|-----------|-------|----------------|---------------|---|---|
| COL27A1   | chr9  | 116930013/G//A | nonsynonymous | 1 | 0 |
| POLR3A    | chr10 | 79784800/C//T  | nonsynonymous | 1 | 0 |
| GALNT18   | chr11 | 11394142/G//A  | nonsynonymous | 1 | 0 |
| KIAA1549L | chr11 | 33604953/C//T  | nonsynonymous | 1 | 0 |
| MYRF      | chr11 | 61541579/C//T  | nonsynonymous | 1 | 0 |
| TRIM77    | chr11 | 89443484/G//A  | synonymous    | 1 | 0 |
| TTC36     | chr11 | 118398228/C//T | nonsynonymous | 1 | 0 |
| P3H3      | chr12 | 6948564/G//A   | nonsynonymous | 1 | 0 |
| GRIN2B    | chr12 | 13906587/C//A  | nonsynonymous | 1 | 0 |
| LDHB      | chr12 | 21796917/T//A  | nonsynonymous | 1 | 0 |
| PKP2      | chr12 | 33021996/C//G  | synonymous    | 1 | 0 |
| HNRNPA1   | chr12 | 54676359/C//A  | synonymous    | 1 | 0 |
| OR6C65    | chr12 | 55795024/A//T  | nonsynonymous | 1 | 0 |
| TBC1D15   | chr12 | 72274354/G//C  | nonsynonymous | 1 | 0 |
| C12orf42  | chr12 | 103696309/G//T | synonymous    | 1 | 0 |
| CKAP2     | chr13 | 53036547/C//G  | nonsynonymous | 1 | 0 |
| CCDC168   | chr13 | 103388680/G//A | synonymous    | 1 | 0 |
| FBN1      | chr15 | 48937088/C//G  | synonymous    | 1 | 0 |
| GALK2     | chr15 | 49509471/C//T  | nonsynonymous | 1 | 0 |
| GRIN2A    | chr16 | 9943750/G//A   | synonymous    | 1 | 0 |
| NETO2     | chr16 | 47162361/T//A  | nonsynonymous | 1 | 0 |
| LRRC36    | chr16 | 67418886/C//A  | nonsynonymous | 1 | 0 |
| HYDIN     | chr16 | 71065612/G//A  | nonsynonymous | 1 | 0 |
| JPH3      | chr16 | 87677973/C//A  | synonymous    | 1 | 0 |
| ACACA     | chr17 | 35557125/T//C  | nonsynonymous | 1 | 0 |
| BPTF      | chr17 | 65907995/T//G  | nonsynonymous | 1 | 0 |
| CANT1     | chr17 | 76989693/C//T  | nonsynonymous | 1 | 0 |
| CTDP1     | chr18 | 77475022/C//T  | nonsynonymous | 1 | 0 |
| RFX2      | chr19 | 6002749/C//A   | nonsynonymous | 1 | 0 |
| PNPLA6    | chr19 | 7625640/G//A   | nonsynonymous | 1 | 0 |
| HAPLN4    | chr19 | 19369607/G//A  | nonsynonymous | 1 | 0 |
| ATP4A     | chr19 | 36054173/G//T  | synonymous    | 1 | 0 |
| FOSB      | chr19 | 45974139/G//A  | nonsynonymous | 1 | 0 |
| FBXO46    | chr19 | 46216673/C//T  | synonymous    | 1 | 0 |
| ZSCAN1    | chr19 | 58565250/G//A  | nonsynonymous | 1 | 0 |
| APMAP     | chr20 | 24944599/G//A  | synonymous    | 1 | 0 |
|           | chr20 | 60074490/G//T  | synonymous    | 1 | 0 |
| CRYBA4    | chr22 | 27019251/C//T  | synonymous    | 1 | 0 |
| ARSF      | chrX  | 3030585/C//T   | synonymous    | 1 | 0 |
| CA5B      | chrX  | 15792527/T//A  | synonymous    | 1 | 0 |
| NTNG1     | chr1  | 107937956/A//C | synonymous    | 0 | 1 |
| RGSL1     | chr1  | 182491205/T//C | nonsynonymous | 0 | 1 |
| TMCC2     | chr1  | 205241043/G//A | nonsynonymous | 0 | 1 |
| OBSCN     | chr1  | 228494222/C//T | nonsynonymous | 0 | 1 |
| SCAP      | chr3  | 47470070/A//G  | nonsynonymous | 0 | 1 |
| KIAA1524  | chr3  | 108304006/T//A | synonymous    | 0 | 1 |
| LG12      | chr4  | 25019735/C//G  | nonsynonymous | 0 | 1 |
| MAP1B     | chr5  | 71492853/G//T  | nonsynonymous | 0 | 1 |
| APC       | chr5  | 112164578/T//A | nonsynonymous | 0 | 1 |
| LARS      | chr5  | 145509709/T//C | nonsynonymous | 0 | 1 |
| MAPK14    | chr6  | 36063811/G//A  | nonsynonymous | 0 | 1 |
| IKZF1     | chr7  | 50367289/G//A  | synonymous    | 0 | 1 |
| PCLO      | chr7  | 82581167/C//G  | synonymous    | 0 | 1 |
| MUC12     | chr7  | 100635178/A//T | nonsynonymous | 0 | 1 |
| PLXNA4    | chr7  | 132192823/C//T | synonymous    | 0 | 1 |
| CDH17     | chr8  | 95174368/C//T  | synonymous    | 0 | 1 |
| C5        | chr9  | 123776206/G//A | synonymous    | 0 | 1 |
| COL5A1    | chr9  | 137642661/C//T | nonsynonymous | 0 | 1 |
| ARMC3     | chr10 | 23326330/C//T  | synonymous    | 0 | 1 |
| LCOR      | chr10 | 98742016/C//T  | nonsynonymous | 0 | 1 |
| CNNM1     | chr10 | 101089444/C//T | synonymous    | 0 | 1 |
| OR5M9     | chr11 | 56230253/G//T  | nonsynonymous | 0 | 1 |
| TMX2      | chr11 | 57480265/T//C  | nonsynonymous | 0 | 1 |
| ZFP91     | chr11 | 58346873/C//T  | nonsynonymous | 0 | 1 |
| TYR       | chr11 | 88924452/C//T  | nonsynonymous | 0 | 1 |
| EXPH5     | chr11 | 108385606/A//G | synonymous    | 0 | 1 |
| GNB3      | chr12 | 6953097/C//T   | synonymous    | 0 | 1 |
| DBX2      | chr12 | 45444578/G//A  | nonsynonymous | 0 | 1 |
| FAM186B   | chr12 | 49992607/C//T  | synonymous    | 0 | 1 |
| KRT6B     | chr12 | 52845400/C//T  | nonsynonymous | 0 | 1 |

|          |       |                  |               |   |   |
|----------|-------|------------------|---------------|---|---|
| EIF4B    | chr12 | 53421646/G//A    | nonsynonymous | 0 | 1 |
| MAP3K12  | chr12 | 53876679/G//T    | synonymous    | 0 | 1 |
| LRP1     | chr12 | 57553669/C//T    | synonymous    | 0 | 1 |
| CNOT2    | chr12 | 70732324/G//A    | synonymous    | 0 | 1 |
| DEPDC4   | chr12 | 100656060/G//C   | nonsynonymous | 0 | 1 |
| P2RX7    | chr12 | 121613220/T//C   | nonsynonymous | 0 | 1 |
| KDM2B    | chr12 | 121987380/G//A   | synonymous    | 0 | 1 |
| WDR66    | chr12 | 122413496/G//A   | nonsynonymous | 0 | 1 |
| TMEM132B | chr12 | 126068449/C//A   | nonsynonymous | 0 | 1 |
| WASF3    | chr13 | 27255395/G//A    | synonymous    | 0 | 1 |
| UNC13C   | chr15 | 54914521/T//A    | synonymous    | 0 | 1 |
| CD19     | chr16 | 28943799/A//G    | nonsynonymous | 0 | 1 |
| MYLK3    | chr16 | 46781887/C//T    | synonymous    | 0 | 1 |
| PLEKHG4  | chr16 | 67316439/C//G    | nonsynonymous | 0 | 1 |
| CDK5R1   | chr17 | 30814997/G//C    | nonsynonymous | 0 | 1 |
| MYBPC2   | chr19 | 50939082/T//G    | synonymous    | 0 | 1 |
| SIGLEC5  | chr19 | 52130495/G//A    | nonsynonymous | 0 | 1 |
| RBPJL    | chr20 | 43945122/C//T    | synonymous    | 0 | 1 |
| LAMA5    | chr20 | 60888834/G//A    | synonymous    | 0 | 1 |
| DDX17    | chr22 | 38881951/AAGG//A | nonsynonymous | 0 | 1 |
| MXRA5    | chrX  | 3241585/A//T     | nonsynonymous | 0 | 1 |
| P2RY4    | chrX  | 69479282/G//A    | nonsynonymous | 0 | 1 |
| POU3F4   | chrX  | 82763633/G//A    | nonsynonymous | 0 | 1 |
| PUM1     | chr1  | 31406102/C//G    | nonsynonymous | 0 | 1 |
| FOXE3    | chr1  | 47883043/A//G    | synonymous    | 0 | 1 |
| ANGPTL1  | chr1  | 178820238/T//C   | synonymous    | 0 | 1 |
| VN1R5    | chr1  | 247419716/G//T   | nonsynonymous | 0 | 1 |
| OR2T1    | chr1  | 248569354/T//G   | nonsynonymous | 0 | 1 |
| HDLBP    | chr2  | 242179108/G//C   | nonsynonymous | 0 | 1 |
| PIK3CA   | chr3  | 178938934/G//A   | nonsynonymous | 0 | 1 |
| RNF168   | chr3  | 196199258/T//C   | nonsynonymous | 0 | 1 |
| MAPK10   | chr4  | 86989041/C//A    | nonsynonymous | 0 | 1 |
| PDLIM4   | chr5  | 131607507/C//T   | nonsynonymous | 0 | 1 |
| ADRB2    | chr5  | 148207046/G//A   | nonsynonymous | 0 | 1 |
| COL1A2   | chr7  | 94024390/C//A    | nonsynonymous | 0 | 1 |
| CNTNAP2  | chr7  | 147926846/G//A   | nonsynonymous | 0 | 1 |
| MRPL15   | chr8  | 55047798/T//A    | synonymous    | 0 | 1 |
| SMARCA2  | chr9  | 2191355/A//C     | nonsynonymous | 0 | 1 |
| CER1     | chr9  | 14722224/G//T    | synonymous    | 0 | 1 |
| HSD17B3  | chr9  | 99064310/C//T    | nonsynonymous | 0 | 1 |
| MYOF     | chr10 | 95089444/G//A    | synonymous    | 0 | 1 |
| LGR5     | chr12 | 71918204/T//C    | synonymous    | 0 | 1 |
| CEP83    | chr12 | 94772672/C//T    | synonymous    | 0 | 1 |
| RPLP0    | chr12 | 120638651/A//G   | synonymous    | 0 | 1 |
| OAZ2     | chr15 | 64981025/G//A    | nonsynonymous | 0 | 1 |
| MLYCD    | chr16 | 83933211/G//A    | synonymous    | 0 | 1 |
| FASN     | chr17 | 80045615/G//A    | nonsynonymous | 0 | 1 |
| EPG5     | chr18 | 43534537/T//C    | synonymous    | 0 | 1 |
| MUC16    | chr19 | 9070918/A//G     | nonsynonymous | 0 | 1 |
| DOCK6    | chr19 | 11312753/G//T    | nonsynonymous | 0 | 1 |
| CILP2    | chr19 | 19651121/C//T    | nonsynonymous | 0 | 1 |
| TMEM74B  | chr20 | 1161796/G//A     | nonsynonymous | 0 | 1 |
| DGCR14   | chr22 | 19121981/G//A    | nonsynonymous | 0 | 1 |
| MN1      | chr22 | 28194681/G//A    | synonymous    | 0 | 1 |
| FAM46D   | chrX  | 79698430/T//C    | nonsynonymous | 0 | 1 |
| H6PD     | chr1  | 9324740/A//G     | nonsynonymous | 0 | 1 |
| EPHA8    | chr1  | 22903038/G//A    | nonsynonymous | 0 | 1 |
| SLC5A9   | chr1  | 48713132/G//A    | nonsynonymous | 0 | 1 |
| TSSC1    | chr2  | 3358345/C//T     | synonymous    | 0 | 1 |
| SLC25A12 | chr2  | 172650226/G//A   | nonsynonymous | 0 | 1 |
| XIRP1    | chr3  | 39228823/G//T    | nonsynonymous | 0 | 1 |
| MED12L   | chr3  | 151067877/C//T   | nonsynonymous | 0 | 1 |
| SH3TC1   | chr4  | 8238150/C//CT    | nonsynonymous | 0 | 1 |
| ADAMTS16 | chr5  | 5186274/C//T     | synonymous    | 0 | 1 |
| OR2J2    | chr6  | 29141439/G//A    | synonymous    | 0 | 1 |
| MEP1A    | chr6  | 46802394/C//T    | synonymous    | 0 | 1 |
| ADGRF2   | chr6  | 47650350/C//A    | synonymous    | 0 | 1 |
| SFRP4    | chr7  | 37947249/C//A    | synonymous    | 0 | 1 |
| ABCA13   | chr7  | 48411803/C//A    | nonsynonymous | 0 | 1 |
| RINT1    | chr7  | 105187352/T//C   | synonymous    | 0 | 1 |

|           |       |                    |               |   |   |
|-----------|-------|--------------------|---------------|---|---|
| CNGB3     | chr8  | 87683247/G//A      | nonsynonymous | 0 | 1 |
| CASP1     | chr11 | 104905166/G//T     | nonsynonymous | 0 | 1 |
| FLI1      | chr11 | 128680482/C//T     | nonsynonymous | 0 | 1 |
| B3GAT1    | chr11 | 134253667/C//T     | nonsynonymous | 0 | 1 |
| ERC1      | chr12 | 1292584/A//G       | synonymous    | 0 | 1 |
| ACSS3     | chr12 | 81568722/A//G      | synonymous    | 0 | 1 |
| TSC22D1   | chr13 | 45148196/G//C      | nonsynonymous | 0 | 1 |
| BEGAIN    | chr14 | 101005343/C//T     | nonsynonymous | 0 | 1 |
| CRAMP1    | chr16 | 1676080/C//T       | synonymous    | 0 | 1 |
| C16orf45  | chr16 | 15609187/G//A      | synonymous    | 0 | 1 |
| SLC39A6   | chr18 | 33706857/C//T      | synonymous    | 0 | 1 |
| ZNF91     | chr19 | 23544317/C//T      | synonymous    | 0 | 1 |
| GDF5      | chr20 | 34022455/G//A      | nonsynonymous | 0 | 1 |
| KCNQ2     | chr20 | 62071011/G//A      | synonymous    | 0 | 1 |
|           | chr21 | 15954671/C//A      | synonymous    | 0 | 1 |
| KRTAP10-6 | chr21 | 46011496/C//A      | synonymous    | 0 | 1 |
| SSX5      | chrX  | 48053616/C//T      | nonsynonymous | 0 | 1 |
| SMC1A     | chrX  | 53439105/G//A      | nonsynonymous | 0 | 1 |
| CASP9     | chr1  | 15850675/C//A      | synonymous    | 0 | 1 |
| PGM1      | chr1  | 64095214/G//T      | nonsynonymous | 0 | 1 |
| LCE1C     | chr1  | 152777698/T//A     | nonsynonymous | 0 | 1 |
| MYOG      | chr1  | 203054632/C//T     | nonsynonymous | 0 | 1 |
| RYR2      | chr1  | 237796976/C//G     | synonymous    | 0 | 1 |
| OR2T10    | chr1  | 248756761/G//C     | nonsynonymous | 0 | 1 |
| NFE2L2    | chr2  | 178095511/ATC//A   | nonsynonymous | 0 | 1 |
| FBLN2     | chr3  | 13668033/A//T      | synonymous    | 0 | 1 |
| XRN1      | chr3  | 142030262/T//C     | synonymous    | 0 | 1 |
| SI        | chr3  | 164727160/G//C     | nonsynonymous | 0 | 1 |
| NAALADL2  | chr3  | 174974208/C//A     | synonymous    | 0 | 1 |
| TBC1D14   | chr4  | 6925307/T//C       | nonsynonymous | 0 | 1 |
| SLC34A2   | chr4  | 25667723/TTTTG//T  | synonymous    | 0 | 1 |
| SLC34A2   | chr4  | 25667735/GTTTGT//G | synonymous    | 0 | 1 |
| TRIM60    | chr4  | 165961979/C//A     | nonsynonymous | 0 | 1 |
| DST       | chr6  | 56504969/TC//T     | nonsynonymous | 0 | 1 |
| ABCB5     | chr7  | 20782631/CG//C     | nonsynonymous | 0 | 1 |
| HGF       | chr7  | 81336653/C//A      | nonsynonymous | 0 | 1 |
| PCLO      | chr7  | 82390101/C//G      | nonsynonymous | 0 | 1 |
| TRRAP     | chr7  | 98506345/C//G      | synonymous    | 0 | 1 |
| EPPK1     | chr8  | 144943280/C//T     | nonsynonymous | 0 | 1 |
| ZNF34     | chr8  | 145999825/G//C     | nonsynonymous | 0 | 1 |
| WHRN      | chr9  | 117266726/G//A     | nonsynonymous | 0 | 1 |
| C10orf107 | chr10 | 63519814/C//T      | synonymous    | 0 | 1 |
| FAM204A   | chr10 | 120095716/C//T     | nonsynonymous | 0 | 1 |
| GLRX3     | chr10 | 131959192/T//A     | nonsynonymous | 0 | 1 |
| IGF2      | chr11 | 2154144/T//C       | synonymous    | 0 | 1 |
| OR52K2    | chr11 | 4470702/T//C       | nonsynonymous | 0 | 1 |
| TNKS1BP1  | chr11 | 57080756/T//C      | nonsynonymous | 0 | 1 |
| PATL1     | chr11 | 59417078/G//C      | nonsynonymous | 0 | 1 |
| FCHSD2    | chr11 | 72553678/C//T      | nonsynonymous | 0 | 1 |
| CHRD12    | chr11 | 74429831/G//A      | synonymous    | 0 | 1 |
| FAR2      | chr12 | 29462148/TG//T     | nonsynonymous | 0 | 1 |
| KCNH3     | chr12 | 49943951/C//A      | nonsynonymous | 0 | 1 |
| PPFIA2    | chr12 | 81746949/G//T      | nonsynonymous | 0 | 1 |
| NR1H4     | chr12 | 100926290/G//C     | nonsynonymous | 0 | 1 |
| UCHL3     | chr13 | 76179930/T//G      | nonsynonymous | 0 | 1 |
| LCTL      | chr15 | 66853575/C//G      | nonsynonymous | 0 | 1 |
| MYLPF     | chr16 | 30387236/G//T      | synonymous    | 0 | 1 |
| HS3ST3A1  | chr17 | 13503886/G//A      | synonymous    | 0 | 1 |
| EVI2B     | chr17 | 29631196/C//G      | synonymous    | 0 | 1 |
| AFG3L2    | chr18 | 12340252/G//C      | nonsynonymous | 0 | 1 |
| FCGBP     | chr19 | 40373955/G//A      | synonymous    | 0 | 1 |
| CRLS1     | chr20 | 5986868/G//C       | synonymous    | 0 | 1 |
| TAF7L     | chrX  | 100533046/C//A     | nonsynonymous | 0 | 1 |
| TEX13C    | chrX  | 124454433/C//G     | synonymous    | 0 | 1 |
| DCAF12L1  | chrX  | 125686100/C//T     | synonymous    | 0 | 1 |
| UBE2J2    | chr1  | 1192642/T//G       | nonsynonymous | 0 | 1 |
| SGIP1     | chr1  | 67147979/A//C      | synonymous    | 0 | 1 |
| OBSCN     | chr1  | 228495136/C//T     | nonsynonymous | 0 | 1 |
| GGCX      | chr2  | 85781396/C//T      | synonymous    | 0 | 1 |
| TTC30A    | chr2  | 178482604/C//T     | nonsynonymous | 0 | 1 |



|           |       |                          |               |   |   |
|-----------|-------|--------------------------|---------------|---|---|
| GNAT1     | chr3  | 50231182/G//A            | synonymous    | 0 | 1 |
| SEMA3G    | chr3  | 52475330/C//T            | nonsynonymous | 0 | 1 |
| EPHA3     | chr3  | 89259166/C//T            | nonsynonymous | 0 | 1 |
| ADAD1     | chr4  | 123301400/C//T           | synonymous    | 0 | 1 |
| PCDHB2    | chr5  | 140475170/G//A           | nonsynonymous | 0 | 1 |
| IER3      | chr6  | 30711911/G//A            | synonymous    | 0 | 1 |
| TMEM63B   | chr6  | 44121819/C//T            | nonsynonymous | 0 | 1 |
| FAM135A   | chr6  | 71235897/G//A            | nonsynonymous | 0 | 1 |
| MICAL1    | chr6  | 109773533/C//T           | nonsynonymous | 0 | 1 |
| HIP1      | chr7  | 75221753/G//A            | synonymous    | 0 | 1 |
| NYAP1     | chr7  | 100086957/C//T           | nonsynonymous | 0 | 1 |
| EXTL3     | chr8  | 28574802/C//T            | nonsynonymous | 0 | 1 |
| SPATA31C2 | chr9  | 90745357/C//T            | synonymous    | 0 | 1 |
| CNTRL     | chr9  | 123880693/C//T           | nonsynonymous | 0 | 1 |
| HRASLS5   | chr11 | 63233779/G//A            | nonsynonymous | 0 | 1 |
| FAT3      | chr11 | 92600302/C//T            | synonymous    | 0 | 1 |
| MAN2C1    | chr15 | 75654008/G//A            | synonymous    | 0 | 1 |
| PKD1      | chr16 | 2142522/T//C             | nonsynonymous | 0 | 1 |
| SMAD4     | chr18 | 48591894/T//A            | nonsynonymous | 0 | 1 |
|           | chr19 | 15754855/G//A            | synonymous    | 0 | 1 |
| HAPLN4    | chr19 | 19371745/C//T            | nonsynonymous | 0 | 1 |
| ZNF98     | chr19 | 22575496/A//T            | nonsynonymous | 0 | 1 |
| FLRT3     | chr20 | 14307034/T//A            | synonymous    | 0 | 1 |
| TRPM2     | chr21 | 45789077/G//A            | nonsynonymous | 0 | 1 |
| SULT4A1   | chr22 | 44225047/C//A            | nonsynonymous | 0 | 1 |
| FAM47B    | chrX  | 34962445/G//C            | nonsynonymous | 0 | 1 |
| CYLC1     | chrX  | 83128550/G//A            | synonymous    | 0 | 1 |
| DCAF12L2  | chrX  | 125298766/T//A           | nonsynonymous | 0 | 1 |
| GPR50     | chrX  | 150348846/C//T           | nonsynonymous | 0 | 1 |
| TKTL1     | chrX  | 153539368/G//A           | nonsynonymous | 0 | 1 |
| DOCK7     | chr1  | 63113932/AG//A           | nonsynonymous | 0 | 1 |
| CCT3      | chr1  | 156307997/G//A           | synonymous    | 0 | 1 |
| SEMA4F    | chr2  | 74907086/G//A            | nonsynonymous | 0 | 1 |
| ZMIZ1     | chr10 | 81051993/CGCGGCAGCCGCTGC | nonsynonymous | 0 | 1 |
| CSPG4     | chr15 | 75981709/A//G            | nonsynonymous | 0 | 1 |
| ERBB2     | chr17 | 37881345/T//C            | nonsynonymous | 0 | 1 |
| ACP7      | chr19 | 39589686/G//A            | nonsynonymous | 0 | 1 |
| SBK2      | chr19 | 56047541/C//T            | nonsynonymous | 0 | 1 |
| TFAP2C    | chr20 | 55206670/C//T            | nonsynonymous | 0 | 1 |
| GTPBP1    | chr22 | 39125525/A//G            | nonsynonymous | 0 | 1 |
| GPR50     | chrX  | 150345216/C//G           | nonsynonymous | 0 | 1 |
| PCDHA3    | chr5  | 140183048/C//A           | nonsynonymous | 0 | 1 |
| TNFSF11   | chr13 | 43148506/G//A            | nonsynonymous | 0 | 1 |
| MSI2      | chr17 | 55693409/A//G            | nonsynonymous | 0 | 1 |
| SLC16A3   | chr17 | 80195184/T//C            | nonsynonymous | 0 | 1 |
| CHERP     | chr19 | 16640563/AGCT//A         | nonsynonymous | 0 | 1 |
| ZNF676    | chr19 | 22363008/C//G            | nonsynonymous | 0 | 1 |
| SAMM50    | chr22 | 44368781/G//A            | nonsynonymous | 0 | 1 |
| PIP4K2A   | chr10 | 23003239/T//C            | nonsynonymous | 1 | 0 |
| GCN1      | chr12 | 120599831/A//G           | nonsynonymous | 1 | 0 |
| SERINC4   | chr15 | 44087251/T//C            | nonsynonymous | 1 | 0 |
| INSL3     | chr19 | 17932375/A//G            | synonymous    | 1 | 0 |
| ST6GAL2   | chr2  | 107460201/T//C           | nonsynonymous | 1 | 0 |
| TRAF2     | chr9  | 139793362/G//C           | nonsynonymous | 1 | 0 |
| ADIPOR2   | chr12 | 1863603/A//G             | nonsynonymous | 1 | 0 |
| ATP10A    | chr15 | 25959150/C//T            | nonsynonymous | 1 | 0 |
| NAE1      | chr16 | 66852506/A//G            | synonymous    | 1 | 0 |
| ZNRF1     | chr16 | 75033852/T//C            | nonsynonymous | 1 | 0 |
| ABCA9     | chr17 | 67022530/C//T            | nonsynonymous | 1 | 0 |
| MMEL1     | chr1  | 2542728/A//G             | nonsynonymous | 1 | 0 |
|           | chr1  | 247150542/T//A           | synonymous    | 1 | 0 |
|           | chr1  | 247150551/G//A           | synonymous    | 1 | 0 |
| PXDN      | chr2  | 1639248/C//G             | nonsynonymous | 1 | 0 |
| C5orf42   | chr5  | 37165766/T//C            | nonsynonymous | 1 | 0 |
| KCNK5     | chr6  | 39162513/T//C            | nonsynonymous | 1 | 0 |
| SSC4D     | chr7  | 76022934/T//C            | nonsynonymous | 1 | 0 |
| PODXL     | chr7  | 131241050/C//T           | synonymous    | 1 | 0 |
| MBOAT4    | chr8  | 29990036/A//G            | nonsynonymous | 1 | 0 |
| DMRT1     | chr9  | 841741/T//C              | synonymous    | 1 | 0 |
| ECD       | chr10 | 74914059/A//G            | synonymous    | 1 | 0 |

|          |       |                 |               |   |   |
|----------|-------|-----------------|---------------|---|---|
| LARP4    | chr12 | 50867931/C//CG  | nonsynonymous | 1 | 0 |
| C14orf2  | chr14 | 104379017/G//A  | nonsynonymous | 1 | 0 |
| IGDCC4   | chr15 | 65702650/T//C   | synonymous    | 1 | 0 |
| EFNB3    | chr17 | 7613025/T//C    | synonymous    | 1 | 0 |
| ZNF626   | chr19 | 20807769/A//C   | nonsynonymous | 1 | 0 |
| ZNF676   | chr19 | 22363615/T//C   | nonsynonymous | 1 | 0 |
| ZNF676   | chr19 | 22363631/G//A   | synonymous    | 1 | 0 |
| ZNF676   | chr19 | 22363634/C//A   | nonsynonymous | 1 | 0 |
| MYH14    | chr19 | 50770179/G//A   | nonsynonymous | 1 | 0 |
| DTD1     | chr20 | 18724797/A//G   | synonymous    | 1 | 0 |
| JADE3    | chrX  | 46884272/A//G   | nonsynonymous | 1 | 0 |
| ZCCHC12  | chrX  | 117959635/A//G  | nonsynonymous | 1 | 0 |
| AGRN     | chr1  | 979794/C//T     | synonymous    | 1 | 0 |
| DPYD     | chr1  | 97839203/T//A   | synonymous    | 1 | 0 |
| FLG      | chr1  | 152280074/G//A  | nonsynonymous | 1 | 0 |
| CHRN2    | chr1  | 154543930/C//T  | nonsynonymous | 1 | 0 |
| KCNJ10   | chr1  | 160012074/G//T  | synonymous    | 1 | 0 |
| OR2L3    | chr1  | 248224727/T//G  | synonymous    | 1 | 0 |
| LRP2     | chr2  | 170063416/G//A  | nonsynonymous | 1 | 0 |
| IRS1     | chr2  | 227662489/G//A  | synonymous    | 1 | 0 |
| TRAK1    | chr3  | 42264846/G//A   | nonsynonymous | 1 | 0 |
| UBA3     | chr3  | 69104537/A//G   | synonymous    | 1 | 0 |
| HSD17B13 | chr4  | 88226425/C//T   | nonsynonymous | 1 | 0 |
| LNPEP    | chr5  | 96358084/T//C   | synonymous    | 1 | 0 |
|          | chr5  | 112043461/C//T  | synonymous    | 1 | 0 |
| PCDHA2   | chr5  | 140176778/C//A  | nonsynonymous | 1 | 0 |
| PCDHGB3  | chr5  | 140751848/G//A  | synonymous    | 1 | 0 |
| PRSS35   | chr6  | 84234147/C//T   | synonymous    | 1 | 0 |
| GOPC     | chr6  | 117890852/C//T  | synonymous    | 1 | 0 |
| CPA1     | chr7  | 130023270/C//T  | synonymous    | 1 | 0 |
| CUL1     | chr7  | 148484180/G//A  | nonsynonymous | 1 | 0 |
| GIMAP6   | chr7  | 150324902/C//T  | nonsynonymous | 1 | 0 |
| CSMD1    | chr8  | 3047474/G//A    | synonymous    | 1 | 0 |
| SLC39A14 | chr8  | 22269720/G//A   | nonsynonymous | 1 | 0 |
| CYHR1    | chr8  | 145690232/A//T  | nonsynonymous | 1 | 0 |
| TAF1L    | chr9  | 32632961/G//A   | nonsynonymous | 1 | 0 |
| OR1L6    | chr9  | 125512606/C//T  | synonymous    | 1 | 0 |
| KIF5B    | chr10 | 32317393/G//T   | nonsynonymous | 1 | 0 |
| SORCS1   | chr10 | 108431069/C//T  | synonymous    | 1 | 0 |
| RNF169   | chr11 | 74546991/C//A   | nonsynonymous | 1 | 0 |
| FOXM1    | chr12 | 2967884/T//G    | nonsynonymous | 1 | 0 |
| PZP      | chr12 | 9307325/C//T    | nonsynonymous | 1 | 0 |
| PUS7L    | chr12 | 44124241/CAA//C | nonsynonymous | 1 | 0 |
| POLR3B   | chr12 | 106804719/G//A  | nonsynonymous | 1 | 0 |
| TCTN2    | chr12 | 124184288/G//A  | nonsynonymous | 1 | 0 |
| TMEM132B | chr12 | 126138932/G//C  | nonsynonymous | 1 | 0 |
| SUGT1    | chr13 | 53241033/G//A   | synonymous    | 1 | 0 |
| SLITRK1  | chr13 | 84454176/G//A   | synonymous    | 1 | 0 |
| SLITRK1  | chr13 | 84454768/G//C   | nonsynonymous | 1 | 0 |
| CCDC168  | chr13 | 103401346/C//T  | synonymous    | 1 | 0 |
| LRP10    | chr14 | 23346254/C//T   | nonsynonymous | 1 | 0 |
| GZMB     | chr14 | 25101548/G//A   | synonymous    | 1 | 0 |
| GZMB     | chr14 | 25101589/G//C   | nonsynonymous | 1 | 0 |
| APBA2    | chr15 | 29409362/A//G   | synonymous    | 1 | 0 |
| TSC2     | chr16 | 2108832/T//C    | synonymous    | 1 | 0 |
| TMC7     | chr16 | 19049234/A//G   | synonymous    | 1 | 0 |
| GTF3C1   | chr16 | 27514295/T//A   | nonsynonymous | 1 | 0 |
| CTU2     | chr16 | 88780897/CTG//C | synonymous    | 1 | 0 |
| SMYD4    | chr17 | 1690801/G//A    | synonymous    | 1 | 0 |
| CHD3     | chr17 | 7798351/C//G    | nonsynonymous | 1 | 0 |
| SLC35G3  | chr17 | 33521220/G//A   | nonsynonymous | 1 | 0 |
| SP6      | chr17 | 45925699/G//A   | nonsynonymous | 1 | 0 |
| CDR2L    | chr17 | 72999831/C//T   | nonsynonymous | 1 | 0 |
| LBP      | chr20 | 36982731/C//A   | nonsynonymous | 1 | 0 |
| PTPRT    | chr20 | 41419897/C//T   | nonsynonymous | 1 | 0 |
| JPH2     | chr20 | 42788732/C//T   | nonsynonymous | 1 | 0 |
| OPRL1    | chr20 | 62729459/G//C   | nonsynonymous | 1 | 0 |
| ADAMTS5  | chr21 | 28338183/T//G   | nonsynonymous | 1 | 0 |
| ZCCHC5   | chrX  | 77912749/A//G   | nonsynonymous | 1 | 0 |
| TAF7L    | chrX  | 100547857/G//A  | synonymous    | 1 | 0 |

|           |       |                 |               |   |   |
|-----------|-------|-----------------|---------------|---|---|
| ZIC3      | chrX  | 136649333/G//T  | synonymous    | 1 | 0 |
| SPANXD    | chrX  | 140785625/C//A  | nonsynonymous | 1 | 0 |
| FMR1      | chrX  | 147014079/G//A  | nonsynonymous | 1 | 0 |
| ARHGAP4   | chrX  | 153174570/C//T  | nonsynonymous | 1 | 0 |
| HIVEP3    | chr1  | 42045813/C//T   | synonymous    | 0 | 1 |
| CYP4B1    | chr1  | 47264788/C//T   | nonsynonymous | 0 | 1 |
| MYSM1     | chr1  | 59165695/G//A   | synonymous    | 0 | 1 |
| PTGFR     | chr1  | 79002253/C//A   | nonsynonymous | 0 | 1 |
| MCOLN2    | chr1  | 85405335/G//A   | synonymous    | 0 | 1 |
| GBP7      | chr1  | 89599000/C//G   | nonsynonymous | 0 | 1 |
| COL11A1   | chr1  | 103540170/T//C  | synonymous    | 0 | 1 |
| HRNR      | chr1  | 152191365/C//T  | nonsynonymous | 0 | 1 |
| UBAP2L    | chr1  | 154221739/G//C  | nonsynonymous | 0 | 1 |
| KIAA0040  | chr1  | 175130048/G//T  | synonymous    | 0 | 1 |
| CFHR3     | chr1  | 196743997/T//G  | synonymous    | 0 | 1 |
| CRB1      | chr1  | 197390836/T//C  | synonymous    | 0 | 1 |
| SRGAP2    | chr1  | 206634422/G//A  | nonsynonymous | 0 | 1 |
| TRIM11    | chr1  | 228588676/C//G  | nonsynonymous | 0 | 1 |
| MAP3K21   | chr1  | 233507833/G//A  | synonymous    | 0 | 1 |
| TPO       | chr2  | 1426881/C//A    | synonymous    | 0 | 1 |
| HECW2     | chr2  | 197118754/C//A  | nonsynonymous | 0 | 1 |
| SCG2      | chr2  | 224462870/T//A  | synonymous    | 0 | 1 |
| ARL4C     | chr2  | 235404992/T//A  | nonsynonymous | 0 | 1 |
| AGAP1     | chr2  | 236659131/C//T  | synonymous    | 0 | 1 |
| COL6A3    | chr2  | 238243285/G//A  | synonymous    | 0 | 1 |
| SUSD5     | chr3  | 33194840/G//A   | synonymous    | 0 | 1 |
| COL7A1    | chr3  | 48601795/C//T   | synonymous    | 0 | 1 |
| MITF      | chr3  | 70008562/C//T   | synonymous    | 0 | 1 |
| USF3      | chr3  | 113376663/G//A  | nonsynonymous | 0 | 1 |
| SH3TC1    | chr4  | 8233747/G//A    | nonsynonymous | 0 | 1 |
| KIT       | chr4  | 55561681/C//G   | nonsynonymous | 0 | 1 |
| KIAA1211  | chr4  | 57182264/CAGA/C | nonsynonymous | 0 | 1 |
| GC        | chr4  | 72611869/A//T   | synonymous    | 0 | 1 |
|           | chr5  | 59284438/G//A   | synonymous    | 0 | 1 |
| APC       | chr5  | 112128191/C//T  | nonsynonymous | 0 | 1 |
| REEP5     | chr5  | 112257816/G//C  | synonymous    | 0 | 1 |
| FBN2      | chr5  | 127626533/C//G  | nonsynonymous | 0 | 1 |
| PCDHB4    | chr5  | 140502210/C//T  | synonymous    | 0 | 1 |
| PCDH1     | chr5  | 141243762/C//T  | nonsynonymous | 0 | 1 |
| STC2      | chr5  | 172744904/G//A  | synonymous    | 0 | 1 |
| RMND5B    | chr5  | 177570001/C//T  | synonymous    | 0 | 1 |
| NUP153    | chr6  | 17625046/C//T   | nonsynonymous | 0 | 1 |
| GPSM3     | chr6  | 32159157/T//G   | nonsynonymous | 0 | 1 |
| PTCRA     | chr6  | 42893213/C//T   | synonymous    | 0 | 1 |
| PKHD1     | chr6  | 51524320/T//C   | nonsynonymous | 0 | 1 |
| DDO       | chr6  | 110714549/C//T  | synonymous    | 0 | 1 |
| SLC16A10  | chr6  | 111540010/G//A  | synonymous    | 0 | 1 |
| MYCT1     | chr6  | 153043221/G//C  | nonsynonymous | 0 | 1 |
| FERD3L    | chr7  | 19184863/GT//G  | nonsynonymous | 0 | 1 |
| IKZF1     | chr7  | 50455035/T//G   | synonymous    | 0 | 1 |
| SEMA3C    | chr7  | 80378263/T//C   | nonsynonymous | 0 | 1 |
| STAG3     | chr7  | 99796170/C//T   | synonymous    | 0 | 1 |
| OR9A4     | chr7  | 141619376/G//A  | nonsynonymous | 0 | 1 |
| PRKAG2    | chr7  | 151372634/G//A  | nonsynonymous | 0 | 1 |
| XKR5      | chr8  | 6669809/T//C    | nonsynonymous | 0 | 1 |
| INTS9     | chr8  | 28627517/C//T   | synonymous    | 0 | 1 |
| GPIHBP1   | chr8  | 144295103/G//A  | synonymous    | 0 | 1 |
| PRUNE2    | chr9  | 79321992/T//G   | nonsynonymous | 0 | 1 |
| GABBR2    | chr9  | 101216403/C//T  | nonsynonymous | 0 | 1 |
| OLFM1     | chr9  | 138011488/G//A  | nonsynonymous | 0 | 1 |
| MYO3A     | chr10 | 26491973/C//G   | nonsynonymous | 0 | 1 |
| SLIT1     | chr10 | 98819920/G//A   | synonymous    | 0 | 1 |
| ANKRD2    | chr10 | 99340708/C//T   | nonsynonymous | 0 | 1 |
| NOLC1     | chr10 | 103917211/C//T  | synonymous    | 0 | 1 |
| ACTR1A    | chr10 | 104244007/G//A  | synonymous    | 0 | 1 |
| TCF7L2    | chr10 | 114912200/G//A  | nonsynonymous | 0 | 1 |
| VAX1      | chr10 | 118896030/G//A  | nonsynonymous | 0 | 1 |
| RAB11FIP2 | chr10 | 119768573/G//A  | nonsynonymous | 0 | 1 |
| DOCK1     | chr10 | 128830019/T//C  | nonsynonymous | 0 | 1 |
| MUC6      | chr11 | 1016713/T//C    | nonsynonymous | 0 | 1 |

|           |       |                          |               |   |   |
|-----------|-------|--------------------------|---------------|---|---|
| MUC5B     | chr11 | 1272623/T//C             | nonsynonymous | 0 | 1 |
| MS4A3     | chr11 | 59834472/G//C            | nonsynonymous | 0 | 1 |
| BBS1      | chr11 | 66287225/C//T            | synonymous    | 0 | 1 |
| MRE11     | chr11 | 94192684/T//C            | nonsynonymous | 0 | 1 |
| PDGFD     | chr11 | 103797727/C//T           | synonymous    | 0 | 1 |
| DSCAML1   | chr11 | 117651528/G//A           | synonymous    | 0 | 1 |
| AAAS      | chr12 | 53703472/G//A            | synonymous    | 0 | 1 |
| CCDC92    | chr12 | 124428910/T//A           | synonymous    | 0 | 1 |
| SLC46A3   | chr13 | 29284912/G//A            | nonsynonymous | 0 | 1 |
| ELF1      | chr13 | 41507644/C//T            | nonsynonymous | 0 | 1 |
| SLITRK6   | chr13 | 86369306/G//A            | synonymous    | 0 | 1 |
| C14orf178 | chr14 | 78235922/G//A            | synonymous    | 0 | 1 |
| TMEM121   | chr14 | 105995632/C//T           | nonsynonymous | 0 | 1 |
| GABRB3    | chr15 | 26793096/C//T            | synonymous    | 0 | 1 |
| SPATA5L1  | chr15 | 45694622/T//C            | synonymous    | 0 | 1 |
| KIF7      | chr15 | 90176203/G//A            | synonymous    | 0 | 1 |
| ABCA3     | chr16 | 2369616/C//T             | nonsynonymous | 0 | 1 |
| ABCA3     | chr16 | 2374411/C//T             | synonymous    | 0 | 1 |
| PPL       | chr16 | 4935100/T//G             | nonsynonymous | 0 | 1 |
| FTO       | chr16 | 54145851/G//A            | synonymous    | 0 | 1 |
| FUK       | chr16 | 70499064/C//G            | nonsynonymous | 0 | 1 |
| ZFH3      | chr16 | 72830219/A//G            | nonsynonymous | 0 | 1 |
| SYCE1L    | chr16 | 77233354/G//A            | synonymous    | 0 | 1 |
| TP53      | chr17 | 7579311/C//A             | nonsynonymous | 0 | 1 |
| KDM6B     | chr17 | 7749185/T//TCC           | nonsynonymous | 0 | 1 |
| MPRIIP    | chr17 | 17041372/C//T            | synonymous    | 0 | 1 |
| CORO6     | chr17 | 27946176/C//T            | nonsynonymous | 0 | 1 |
| IFI35     | chr17 | 41165164/G//A            | nonsynonymous | 0 | 1 |
|           | chr17 | 42987481/C//T            | synonymous    | 0 | 1 |
| CDC27     | chr17 | 45234685/G//A            | nonsynonymous | 0 | 1 |
| KPNB1     | chr17 | 45754410/G//T            | nonsynonymous | 0 | 1 |
| RPS6KB1   | chr17 | 57970599/C//A            | nonsynonymous | 0 | 1 |
| SMAD4     | chr18 | 48591921/T//G            | nonsynonymous | 0 | 1 |
| C2CD4C    | chr19 | 407709/G//C              | nonsynonymous | 0 | 1 |
| ELANE     | chr19 | 855598/A//T              | nonsynonymous | 0 | 1 |
| ZNF98     | chr19 | 22586201/G//T            | nonsynonymous | 0 | 1 |
| LRP3      | chr19 | 33696821/A//G            | nonsynonymous | 0 | 1 |
| SPIB      | chr19 | 50925794/G//A            | nonsynonymous | 0 | 1 |
| ZNF814    | chr19 | 58384769/C//G            | synonymous    | 0 | 1 |
| CHGB      | chr20 | 5903078/C//T             | synonymous    | 0 | 1 |
| NAA20     | chr20 | 19998003/G//T            | synonymous    | 0 | 1 |
| EIF6      | chr20 | 33867388/G//A            | nonsynonymous | 0 | 1 |
| MC3R      | chr20 | 54824062/G//C            | nonsynonymous | 0 | 1 |
| MRPL39    | chr21 | 26976123/T//A            | synonymous    | 0 | 1 |
| SON       | chr21 | 34922321/C//T            | nonsynonymous | 0 | 1 |
| FTCD      | chr21 | 47571516/G//C            | nonsynonymous | 0 | 1 |
| PRODH     | chr22 | 18912607/G//A            | synonymous    | 0 | 1 |
| GAS2L1    | chr22 | 29707795/A//G            | nonsynonymous | 0 | 1 |
| ASCC2     | chr22 | 30184940/C//T            | synonymous    | 0 | 1 |
| CSDC2     | chr22 | 41968063/A//G            | nonsynonymous | 0 | 1 |
| KLHL4     | chrX  | 86868879/G//T            | nonsynonymous | 0 | 1 |
| DCAF12L1  | chrX  | 125685849/C//T           | nonsynonymous | 0 | 1 |
| HS6ST2    | chrX  | 131762287/G//C           | synonymous    | 0 | 1 |
| DFFB      | chr1  | 3773968/C//T             | synonymous    | 0 | 1 |
| AIM1L     | chr1  | 26648652/T//C            | synonymous    | 0 | 1 |
| AIM1L     | chr1  | 26672434/T//C            | nonsynonymous | 0 | 1 |
| IPP       | chr1  | 46206798/A//C            | nonsynonymous | 0 | 1 |
| LEPR      | chr1  | 66101983/G//A            | nonsynonymous | 0 | 1 |
| OTUD7B    | chr1  | 149943040/A//G           | synonymous    | 0 | 1 |
| RORC      | chr1  | 151787583/G//C           | nonsynonymous | 0 | 1 |
| MSTO1     | chr1  | 155581968/T//C           | synonymous    | 0 | 1 |
| MSTO1     | chr1  | 155582074/C//T           | synonymous    | 0 | 1 |
| OR6K3     | chr1  | 158687886/G//C           | nonsynonymous | 0 | 1 |
| SLAMF7    | chr1  | 160722899/G//A           | nonsynonymous | 0 | 1 |
|           | chr1  | 168161569/G//A           | synonymous    | 0 | 1 |
| CACNA1E   | chr1  | 181767545/A//G           | nonsynonymous | 0 | 1 |
| FH        | chr1  | 241682991/G//C           | nonsynonymous | 0 | 1 |
| RAD51AP2  | chr2  | 17699418/ACGAGTCTGTGGAGT | nonsynonymous | 0 | 1 |
| FNDC4     | chr2  | 27717530/T//C            | nonsynonymous | 0 | 1 |
| GLI2      | chr2  | 121746043/C//T           | synonymous    | 0 | 1 |

|            |       |                |               |   |   |
|------------|-------|----------------|---------------|---|---|
| TOP2B      | chr3  | 25648812/T//G  | nonsynonymous | 0 | 1 |
| SNRK       | chr3  | 43390077/C//T  | synonymous    | 0 | 1 |
| TGM4       | chr3  | 44952766/C//A  | nonsynonymous | 0 | 1 |
| SLC9C1     | chr3  | 111962844/A//G | nonsynonymous | 0 | 1 |
| PLA1A      | chr3  | 119348280/A//G | nonsynonymous | 0 | 1 |
| DGKG       | chr3  | 186006613/G//C | nonsynonymous | 0 | 1 |
| DDX60L     | chr4  | 169383142/G//C | nonsynonymous | 0 | 1 |
| DNAH5      | chr5  | 13792118/G//T  | synonymous    | 0 | 1 |
| IPO11      | chr5  | 61785974/C//T  | nonsynonymous | 0 | 1 |
| ERBIN      | chr5  | 65374334/C//A  | synonymous    | 0 | 1 |
| DMXL1      | chr5  | 118485294/A//T | nonsynonymous | 0 | 1 |
| SNX2       | chr5  | 122130970/T//G | nonsynonymous | 0 | 1 |
| ADAMTS19   | chr5  | 129019821/G//A | synonymous    | 0 | 1 |
| KDM3B      | chr5  | 137753171/G//A | nonsynonymous | 0 | 1 |
| CSF1R      | chr5  | 149459893/G//A | nonsynonymous | 0 | 1 |
| GEMIN5     | chr5  | 154317583/G//A | synonymous    | 0 | 1 |
| WWC1       | chr5  | 167841359/C//A | synonymous    | 0 | 1 |
| BTNL3      | chr5  | 180424438/T//C | nonsynonymous | 0 | 1 |
| CNPY3-GNMT | chr6  | 42897355/C//G  | nonsynonymous | 0 | 1 |
| ADGRF5     | chr6  | 46821794/A//T  | nonsynonymous | 0 | 1 |
| CD2AP      | chr6  | 47471039/T//A  | nonsynonymous | 0 | 1 |
| ADGRB3     | chr6  | 70071139/A//G  | nonsynonymous | 0 | 1 |
| CARD11     | chr7  | 2953083/C//T   | nonsynonymous | 0 | 1 |
| ZNF679     | chr7  | 63727011/A//C  | nonsynonymous | 0 | 1 |
| PTPRZ1     | chr7  | 121650586/C//A | nonsynonymous | 0 | 1 |
| AKR1B10    | chr7  | 134223693/G//T | nonsynonymous | 0 | 1 |
| PREX2      | chr8  | 69058521/G//T  | nonsynonymous | 0 | 1 |
| NCALD      | chr8  | 102705045/A//C | nonsynonymous | 0 | 1 |
| JRK        | chr8  | 143740372/T//G | synonymous    | 0 | 1 |
| HACD4      | chr9  | 21026716/A//G  | nonsynonymous | 0 | 1 |
| CTNNA3     | chr10 | 68940172/G//A  | nonsynonymous | 0 | 1 |
| RRM1       | chr11 | 4141165/T//C   | synonymous    | 0 | 1 |
| HSD17B12   | chr11 | 43775675/A//C  | synonymous    | 0 | 1 |
| KCNK4      | chr11 | 64065584/G//A  | nonsynonymous | 0 | 1 |
| FAT3       | chr11 | 92534407/T//C  | nonsynonymous | 0 | 1 |
| DDX10      | chr11 | 108547863/G//A | nonsynonymous | 0 | 1 |
| OR6X1      | chr11 | 123624395/T//C | nonsynonymous | 0 | 1 |
| GPD1       | chr12 | 50501525/C//T  | nonsynonymous | 0 | 1 |
| TRHDE      | chr12 | 72863615/C//G  | nonsynonymous | 0 | 1 |
| TMEM132B   | chr12 | 125811211/C//T | synonymous    | 0 | 1 |
| SACS       | chr13 | 23914023/T//A  | nonsynonymous | 0 | 1 |
| MRPL52     | chr14 | 23299422/G//A  | nonsynonymous | 0 | 1 |
| MOK        | chr14 | 102695928/G//C | nonsynonymous | 0 | 1 |
| KBTBD13    | chr15 | 65369489/G//A  | synonymous    | 0 | 1 |
| ALPK3      | chr15 | 85403072/A//G  | nonsynonymous | 0 | 1 |
| TNRC6A     | chr16 | 24802997/A//G  | nonsynonymous | 0 | 1 |
| PRSS8      | chr16 | 31143475/G//T  | nonsynonymous | 0 | 1 |
| WDR59      | chr16 | 74985432/G//A  | nonsynonymous | 0 | 1 |
| TTLL6      | chr17 | 46882309/G//A  | nonsynonymous | 0 | 1 |
| ASXL3      | chr18 | 31324205/A//G  | nonsynonymous | 0 | 1 |
| MC4R       | chr18 | 58038661/C//A  | nonsynonymous | 0 | 1 |
| ATP5D      | chr19 | 1244502/C//G   | synonymous    | 0 | 1 |
| CACTIN     | chr19 | 3612034/T//C   | nonsynonymous | 0 | 1 |
| ZNF266     | chr19 | 9529218/A//G   | synonymous    | 0 | 1 |
| ZNF560     | chr19 | 9578136/A//G   | nonsynonymous | 0 | 1 |
| RYR1       | chr19 | 38946168/C//T  | nonsynonymous | 0 | 1 |
| HNRNPL     | chr19 | 39334645/T//C  | synonymous    | 0 | 1 |
| CEACAM1    | chr19 | 43023292/C//T  | nonsynonymous | 0 | 1 |
| LILRB2     | chr19 | 54783839/T//C  | synonymous    | 0 | 1 |
| ZNF543     | chr19 | 57840365/G//A  | nonsynonymous | 0 | 1 |
| ZNF335     | chr20 | 44589259/T//C  | nonsynonymous | 0 | 1 |
| BCAS1      | chr20 | 52570096/C//T  | nonsynonymous | 0 | 1 |
| APP        | chr21 | 27372459/C//T  | nonsynonymous | 0 | 1 |
| WRB-SH3BGR | chr21 | 40762768/A//G  | nonsynonymous | 0 | 1 |
| DSCAM      | chr21 | 41459142/T//C  | nonsynonymous | 0 | 1 |
| PI4KA      | chr22 | 21159452/G//C  | nonsynonymous | 0 | 1 |
| TCF20      | chr22 | 42610563/G//A  | nonsynonymous | 0 | 1 |
| PRR5       | chr22 | 45130952/G//A  | nonsynonymous | 0 | 1 |
| PLXNB2     | chr22 | 50727463/T//C  | nonsynonymous | 0 | 1 |
| PLXNB2     | chr22 | 50727469/T//C  | nonsynonymous | 0 | 1 |

|          |       |                    |               |   |   |
|----------|-------|--------------------|---------------|---|---|
| GCNA     | chrX  | 70832706/T//C      | synonymous    | 0 | 1 |
| CHD5     | chr1  | 6203938/C//A       | nonsynonymous | 0 | 1 |
| HIVEP3   | chr1  | 41976299/C//T      | synonymous    | 0 | 1 |
| HIVEP3   | chr1  | 42048697/G//A      | nonsynonymous | 0 | 1 |
| DOCK7    | chr1  | 62940924/C//T      | nonsynonymous | 0 | 1 |
| GON4L    | chr1  | 155823384/G//A     | nonsynonymous | 0 | 1 |
| OR10Z1   | chr1  | 158576251/C//T     | nonsynonymous | 0 | 1 |
| FMO1     | chr1  | 171251173/G//A     | nonsynonymous | 0 | 1 |
| LBX2-AS1 | chr2  | 74729977/T//C      | synonymous    | 0 | 1 |
| ACMSD    | chr2  | 135621089/C//T     | nonsynonymous | 0 | 1 |
| TTN      | chr2  | 179455089/C//A     | nonsynonymous | 0 | 1 |
| ECT2     | chr3  | 172534570/T//C     | synonymous    | 0 | 1 |
| TBCK     | chr4  | 107037433/A//G     | nonsynonymous | 0 | 1 |
| TBCK     | chr4  | 107157555/G//A     | synonymous    | 0 | 1 |
| DCHS2    | chr4  | 155191083/T//C     | synonymous    | 0 | 1 |
| SDHA     | chr5  | 236582/G//A        | nonsynonymous | 0 | 1 |
| DMGDH    | chr5  | 78328642/C//T      | nonsynonymous | 0 | 1 |
| TRIM38   | chr6  | 25983369/GTTTGT//G | synonymous    | 0 | 1 |
| BACH2    | chr6  | 90661231/G//A      | synonymous    | 0 | 1 |
| PCLO     | chr7  | 82475921/T//C      | nonsynonymous | 0 | 1 |
| OPN1SW   | chr7  | 128414653/G//A     | nonsynonymous | 0 | 1 |
| KIF27    | chr9  | 86518279/C//T      | nonsynonymous | 0 | 1 |
| FBXW5    | chr9  | 139835562/G//A     | synonymous    | 0 | 1 |
| PLXDC2   | chr10 | 20335806/A//T      | synonymous    | 0 | 1 |
| ZNF37A   | chr10 | 38407653/G//T      | nonsynonymous | 0 | 1 |
| PCDH15   | chr10 | 55973710/C//A      | nonsynonymous | 0 | 1 |
| HECTD2   | chr10 | 93238009/C//T      | nonsynonymous | 0 | 1 |
| MKI67    | chr10 | 129906964/G//A     | nonsynonymous | 0 | 1 |
| BIRC2    | chr11 | 102248928/A//G     | synonymous    | 0 | 1 |
| CRTAM    | chr11 | 122735343/G//A     | nonsynonymous | 0 | 1 |
| OR6C4    | chr12 | 55945557/G//A      | nonsynonymous | 0 | 1 |
| CEMIP    | chr15 | 81221441/G//T      | synonymous    | 0 | 1 |
| ITGAD    | chr16 | 31434461/A//G      | nonsynonymous | 0 | 1 |
| NOD2     | chr16 | 50745219/C//T      | nonsynonymous | 0 | 1 |
| PLLP     | chr16 | 57295959/C//T      | synonymous    | 0 | 1 |
| ZZEF1    | chr17 | 3919723/A//G       | nonsynonymous | 0 | 1 |
| VTN      | chr17 | 26694933/C//T      | nonsynonymous | 0 | 1 |
|          | chr17 | 30536468/A//C      | synonymous    | 0 | 1 |
| CSH1     | chr17 | 61972886/C//T      | nonsynonymous | 0 | 1 |
| CYGB     | chr17 | 74524594/G//T      | synonymous    | 0 | 1 |
| DLGAP1   | chr18 | 3499087/A//G       | synonymous    | 0 | 1 |
| PHLPP1   | chr18 | 60630622/T//G      | nonsynonymous | 0 | 1 |
| ZNF414   | chr19 | 8576744/G//A       | nonsynonymous | 0 | 1 |
| RGL3     | chr19 | 11505038/G//A      | synonymous    | 0 | 1 |
| ZNF676   | chr19 | 22364007/C//T      | nonsynonymous | 0 | 1 |
| ZNF404   | chr19 | 44377857/A//G      | nonsynonymous | 0 | 1 |
| LILRB4   | chr19 | 55174509/G//T      | synonymous    | 0 | 1 |
| PPP1R12C | chr19 | 55603035/G//A      | synonymous    | 0 | 1 |
| KDM6A    | chrX  | 44942840/G//A      | synonymous    | 0 | 1 |
| ERAS     | chrX  | 48688034/A//T      | synonymous    | 0 | 1 |
| TIMM17B  | chrX  | 48751030/G//A      | synonymous    | 0 | 1 |
| CSMD2    | chr1  | 34158614/A//G      | nonsynonymous | 0 | 1 |
| FHL3     | chr1  | 38463188/C//T      | nonsynonymous | 0 | 1 |
| DNM3     | chr1  | 172007462/C//G     | nonsynonymous | 0 | 1 |
| MRPS22   | chr3  | 139069035/C//T     | synonymous    | 0 | 1 |
| ADAMTS2  | chr5  | 178562922/G//A     | synonymous    | 0 | 1 |
| POM121L2 | chr6  | 27278501/C//T      | synonymous    | 0 | 1 |
| HLA-DQA1 | chr6  | 32610495/A//G      | nonsynonymous | 0 | 1 |
| CALCR    | chr7  | 93116297/T//G      | synonymous    | 0 | 1 |
| CPED1    | chr7  | 120655759/G//A     | nonsynonymous | 0 | 1 |
| POT1     | chr7  | 124464095/G//C     | nonsynonymous | 0 | 1 |
| NPBWR1   | chr8  | 53852834/A//G      | nonsynonymous | 0 | 1 |
| OR5B2    | chr11 | 58189875/A//G      | nonsynonymous | 0 | 1 |
| STX5     | chr11 | 62592546/G//T      | nonsynonymous | 0 | 1 |
| PCNX3    | chr11 | 65404148/C//T      | synonymous    | 0 | 1 |
| PPME1    | chr11 | 73957239/T//C      | nonsynonymous | 0 | 1 |
| SCAF11   | chr12 | 46342214/A//G      | synonymous    | 0 | 1 |
| GGACT    | chr13 | 101184483/C//T     | synonymous    | 0 | 1 |
| FBN1     | chr15 | 48807622/T//C      | nonsynonymous | 0 | 1 |
| UNKL     | chr16 | 1451571/T//C       | nonsynonymous | 0 | 1 |

|          |       |                      |               |   |   |
|----------|-------|----------------------|---------------|---|---|
| TMC7     | chr16 | 19051704/T//C        | nonsynonymous | 0 | 1 |
| POTEC    | chr18 | 14537949/A//G        | nonsynonymous | 0 | 1 |
| SRRM5    | chr19 | 44118129/G//A        | nonsynonymous | 0 | 1 |
| FTL      | chr19 | 49470013/C//T        | synonymous    | 0 | 1 |
| ZNF135   | chr19 | 58579349/C//T        | synonymous    | 0 | 1 |
| PADI2    | chr1  | 17409099/C//T        | nonsynonymous | 0 | 1 |
| PAX7     | chr1  | 19027245/C//T        | synonymous    | 0 | 1 |
| FCRL4    | chr1  | 157559050/C//T       | nonsynonymous | 0 | 1 |
| F13B     | chr1  | 197031010/C//T       | nonsynonymous | 0 | 1 |
| TMEM183A | chr1  | 202984027/C//G       | nonsynonymous | 0 | 1 |
| NFASC    | chr1  | 204966527/C//T       | synonymous    | 0 | 1 |
| OR2L3    | chr1  | 248224569/G//T       | nonsynonymous | 0 | 1 |
| OR2L3    | chr1  | 248224595/C//T       | synonymous    | 0 | 1 |
| ZNF513   | chr2  | 27601830/A//T        | synonymous    | 0 | 1 |
| SEMA4C   | chr2  | 97527309/A//G        | synonymous    | 0 | 1 |
| TTN      | chr2  | 179606148/G//C       | nonsynonymous | 0 | 1 |
| IL17RD   | chr3  | 57199319/G//A        | synonymous    | 0 | 1 |
| PHLDB2   | chr3  | 111659406/C//A       | nonsynonymous | 0 | 1 |
| PIK3CB   | chr3  | 138374293/C//T       | nonsynonymous | 0 | 1 |
| IQGAP2   | chr5  | 75757409/G//T        | nonsynonymous | 0 | 1 |
| EFNA5    | chr5  | 106763129/G//A       | synonymous    | 0 | 1 |
| HSD17B4  | chr5  | 118813117/A//G       | nonsynonymous | 0 | 1 |
| PEX6     | chr6  | 42946321/T//C        | nonsynonymous | 0 | 1 |
| GCLC     | chr6  | 53409465/C//CG       | synonymous    | 0 | 1 |
| GCLC     | chr6  | 53409465/C//CTCCTCCG | synonymous    | 0 | 1 |
| HTR1B    | chr6  | 78172545/G//A        | synonymous    | 0 | 1 |
| CSMD1    | chr8  | 3057290/G//A         | nonsynonymous | 0 | 1 |
| CIZ1     | chr9  | 130942710/C//T       | nonsynonymous | 0 | 1 |
| PELI3    | chr11 | 66239923/C//T        | synonymous    | 0 | 1 |
| RAB38    | chr11 | 87882860/A//G        | nonsynonymous | 0 | 1 |
| MTUS2    | chr13 | 29933457/G//A        | synonymous    | 0 | 1 |
| CMA1     | chr14 | 24974805/G//A        | nonsynonymous | 0 | 1 |
| THBS1    | chr15 | 39876364/G//A        | synonymous    | 0 | 1 |
| SLX4     | chr16 | 3639710/A//T         | nonsynonymous | 0 | 1 |
| NRN1L    | chr16 | 67919762/C//T        | synonymous    | 0 | 1 |
| ZNF469   | chr16 | 88496341/C//T        | synonymous    | 0 | 1 |
| OR1A1    | chr17 | 3119050/G//A         | nonsynonymous | 0 | 1 |
| MC5R     | chr18 | 13826508/C//T        | synonymous    | 0 | 1 |
| BCAM     | chr19 | 45322885/C//T        | synonymous    | 0 | 1 |
| ZNF880   | chr19 | 52887265/A//G        | synonymous    | 0 | 1 |
| NLRP8    | chr19 | 56466873/A//G        | synonymous    | 0 | 1 |
| DDRKG1   | chr20 | 3171273/CTG//C       | synonymous    | 0 | 1 |
| MFAP2    | chr1  | 17303651/G//T        | nonsynonymous | 0 | 1 |
| SYTL1    | chr1  | 27676154/G//A        | synonymous    | 0 | 1 |
| PATJ     | chr1  | 62299378/C//T        | nonsynonymous | 0 | 1 |
| THSD7B   | chr2  | 137814196/C//T       | nonsynonymous | 0 | 1 |
| EVX2     | chr2  | 176945373/G//A       | nonsynonymous | 0 | 1 |
| TTN      | chr2  | 179603090/G//T       | synonymous    | 0 | 1 |
| PAK2     | chr3  | 196509683/A//G       | nonsynonymous | 0 | 1 |
| COL10A1  | chr6  | 116446581/G//A       | synonymous    | 0 | 1 |
| GLI3     | chr7  | 42005498/C//T        | nonsynonymous | 0 | 1 |
| SLC7A2   | chr8  | 17422715/G//A        | synonymous    | 0 | 1 |
| MROH5    | chr8  | 142480822/G//A       | nonsynonymous | 0 | 1 |
| SCRIB    | chr8  | 144885992/C//T       | nonsynonymous | 0 | 1 |
| SLC39A4  | chr8  | 145641986/C//T       | nonsynonymous | 0 | 1 |
| MPDZ     | chr9  | 13168554/A//G        | nonsynonymous | 0 | 1 |
| DNAJA1   | chr9  | 33026899/A//G        | nonsynonymous | 0 | 1 |
| SLC25A51 | chr9  | 37888320/T//G        | synonymous    | 0 | 1 |
| GSN      | chr9  | 124091200/T//G       | synonymous    | 0 | 1 |
| CERS5    | chr12 | 50537804/G//A        | synonymous    | 0 | 1 |
| LARP4    | chr12 | 50834237/T//C        | nonsynonymous | 0 | 1 |
| BAZ2A    | chr12 | 56996496/C//T        | nonsynonymous | 0 | 1 |
| C15orf32 | chr15 | 93015692/C//A        | nonsynonymous | 0 | 1 |
| ABAT     | chr16 | 8875199/T//C         | nonsynonymous | 0 | 1 |
| ITGAD    | chr16 | 31426282/C//T        | synonymous    | 0 | 1 |
| PKD1L2   | chr16 | 81198302/C//T        | nonsynonymous | 0 | 1 |
| NFKBID   | chr19 | 36379425/G//A        | synonymous    | 0 | 1 |
| RNF225   | chr19 | 58908419/C//T        | synonymous    | 0 | 1 |
| GABRA3   | chrX  | 151336737/C//T       | nonsynonymous | 0 | 1 |
| AHDC1    | chr1  | 27875122/C//A        | nonsynonymous | 0 | 1 |

|          |       |                            |               |   |   |
|----------|-------|----------------------------|---------------|---|---|
| LYST     | chr1  | 235840823/T//C             | nonsynonymous | 0 | 1 |
| TTN      | chr2  | 179479268/C//T             | nonsynonymous | 0 | 1 |
| ATG9A    | chr2  | 220089279/C//T             | nonsynonymous | 0 | 1 |
| ESPNL    | chr2  | 239039325/G//C             | nonsynonymous | 0 | 1 |
| GRIP2    | chr3  | 14566940/T//C              | synonymous    | 0 | 1 |
| KALRN    | chr3  | 124193514/T//A             | nonsynonymous | 0 | 1 |
| AFF1     | chr4  | 88052234/G//C              | nonsynonymous | 0 | 1 |
| FAM134B  | chr5  | 16475010/T//C              | nonsynonymous | 0 | 1 |
| BASP1    | chr5  | 17275900/C//T              | nonsynonymous | 0 | 1 |
| LIFR     | chr5  | 38530608/C//T              | nonsynonymous | 0 | 1 |
| UBE3D    | chr6  | 83763916/ATTCT//A          | nonsynonymous | 0 | 1 |
| TMEM106B | chr7  | 12263950/G//C              | nonsynonymous | 0 | 1 |
| ZNF679   | chr7  | 63726759/A//G              | nonsynonymous | 0 | 1 |
| PVRIG    | chr7  | 99818921/G//A              | synonymous    | 0 | 1 |
| GRM8     | chr7  | 126173489/G//A             | synonymous    | 0 | 1 |
| C7orf49  | chr7  | 134851405/T//TTCC          | nonsynonymous | 0 | 1 |
| ZNF746   | chr7  | 149171807/C//T             | nonsynonymous | 0 | 1 |
| DCAF4L2  | chr8  | 88885717/C//T              | synonymous    | 0 | 1 |
| ZHX1     | chr8  | 124265919/C//T             | synonymous    | 0 | 1 |
| SEC24C   | chr10 | 75520133/C//G              | nonsynonymous | 0 | 1 |
| TIAL1    | chr10 | 121342039/C//T             | nonsynonymous | 0 | 1 |
| ANKRD42  | chr11 | 82947521/C//T              | nonsynonymous | 0 | 1 |
| ALG10B   | chr12 | 38714040/T//G              | synonymous    | 0 | 1 |
| MYO16    | chr13 | 109535426/G//T             | nonsynonymous | 0 | 1 |
| DHRS4    | chr14 | 24438039/G//A              | nonsynonymous | 0 | 1 |
| RPS29    | chr14 | 50053002/C//T              | nonsynonymous | 0 | 1 |
| NOXRED1  | chr14 | 77860955/T//C              | synonymous    | 0 | 1 |
| HERC2    | chr15 | 28459114/T//C              | nonsynonymous | 0 | 1 |
| HERC2    | chr15 | 28483904/C//CAA            | nonsynonymous | 0 | 1 |
| MYH10    | chr17 | 8413169/C//A               | nonsynonymous | 0 | 1 |
| MYH13    | chr17 | 10258282/A//C              | nonsynonymous | 0 | 1 |
| ABCA9    | chr17 | 66981227/G//A              | synonymous    | 0 | 1 |
| ALKBH7   | chr19 | 6372996/G//T               | nonsynonymous | 0 | 1 |
| JADE3    | chrX  | 46887268/G//GATTGATTGTTTGT | nonsynonymous | 0 | 1 |
| DIAPH2   | chrX  | 96369753/G//A              | nonsynonymous | 0 | 1 |
| PLEKHG5  | chr1  | 6533322/C//T               | nonsynonymous | 0 | 1 |
| SPOCD1   | chr1  | 32256897/G//A              | synonymous    | 0 | 1 |
| MSH4     | chr1  | 76363656/T//C              | nonsynonymous | 0 | 1 |
| ADGRL4   | chr1  | 79402092/G//C              | synonymous    | 0 | 1 |
| DENND4B  | chr1  | 153916529/C//T             | synonymous    | 0 | 1 |
| OR6K2    | chr1  | 158670091/C//T             | nonsynonymous | 0 | 1 |
| CD244    | chr1  | 160832428/G//A             | nonsynonymous | 0 | 1 |
| SLC19A2  | chr1  | 169437963/T//C             | nonsynonymous | 0 | 1 |
| NAV1     | chr1  | 201752850/A//G             | nonsynonymous | 0 | 1 |
| OR2C3    | chr1  | 247694809/C//T             | synonymous    | 0 | 1 |
| USP34    | chr2  | 61528083/C//A              | synonymous    | 0 | 1 |
| LRRTM4   | chr2  | 77745564/C//A              | nonsynonymous | 0 | 1 |
| WIPF1    | chr2  | 175436483/C//T             | synonymous    | 0 | 1 |
| TTN      | chr2  | 179486606/C//G             | nonsynonymous | 0 | 1 |
| ADAM23   | chr2  | 207395676/C//T             | synonymous    | 0 | 1 |
| ERBB4    | chr2  | 212812147/T//A             | synonymous    | 0 | 1 |
| ABCA12   | chr2  | 215823114/C//T             | nonsynonymous | 0 | 1 |
| IRS1     | chr2  | 227661675/G//A             | nonsynonymous | 0 | 1 |
| CHL1     | chr3  | 440023/G//A                | nonsynonymous | 0 | 1 |
| TCAIM    | chr3  | 44438259/G//A              | nonsynonymous | 0 | 1 |
| TRIM42   | chr3  | 140401368/G//T             | nonsynonymous | 0 | 1 |
| ZIC1     | chr3  | 147131293/C//T             | synonymous    | 0 | 1 |
| KIT      | chr4  | 55593430/C//T              | synonymous    | 0 | 1 |
| TENM3    | chr4  | 183710311/C//T             | synonymous    | 0 | 1 |
| SSBP2    | chr5  | 80736382/G//A              | nonsynonymous | 0 | 1 |
| SLC25A2  | chr5  | 140683054/T//A             | nonsynonymous | 0 | 1 |
| N4BP3    | chr5  | 177547328/C//T             | synonymous    | 0 | 1 |
| IP6K3    | chr6  | 33703227/G//A              | synonymous    | 0 | 1 |
| ZNF318   | chr6  | 43322670/C//T              | nonsynonymous | 0 | 1 |
| CYP39A1  | chr6  | 46593234/C//T              | nonsynonymous | 0 | 1 |
| DEFB112  | chr6  | 50011452/G//A              | nonsynonymous | 0 | 1 |
| SYNE1    | chr6  | 152605182/C//T             | synonymous    | 0 | 1 |
| NOX3     | chr6  | 155750136/G//A             | nonsynonymous | 0 | 1 |
| ASB4     | chr7  | 95157246/C//T              | synonymous    | 0 | 1 |
| NCAPG2   | chr7  | 158439151/C//T             | nonsynonymous | 0 | 1 |



|            |       |                   |               |   |   |
|------------|-------|-------------------|---------------|---|---|
| BLK        | chr8  | 11400849/C//T     | nonsynonymous | 0 | 1 |
| PREX2      | chr8  | 69129868/C//T     | nonsynonymous | 0 | 1 |
| TAF1L      | chr9  | 32634324/G//A     | synonymous    | 0 | 1 |
| FAM13C     | chr10 | 61022280/T//C     | nonsynonymous | 0 | 1 |
| EGR2       | chr10 | 64573638/C//T     | nonsynonymous | 0 | 1 |
| MUC5B      | chr11 | 1274132/G//A      | nonsynonymous | 0 | 1 |
| OR4S2      | chr11 | 55419115/G//A     | nonsynonymous | 0 | 1 |
| TCIRG1     | chr11 | 67812576/G//A     | synonymous    | 0 | 1 |
| ABCD2      | chr12 | 39947887/G//A     | nonsynonymous | 0 | 1 |
| NEMP1      | chr12 | 57463069/G//T     | nonsynonymous | 0 | 1 |
| TMEM132C   | chr12 | 128899885/G//A    | nonsynonymous | 0 | 1 |
| HERC1      | chr15 | 63990951/C//T     | nonsynonymous | 0 | 1 |
| SIAH1      | chr16 | 48395513/T//C     | nonsynonymous | 0 | 1 |
| CKLF-CMTM1 | chr16 | 66612775/G//A     | synonymous    | 0 | 1 |
| SP2        | chr17 | 45973596/G//T     | synonymous    | 0 | 1 |
| DNAH17     | chr17 | 76472727/T//C     | nonsynonymous | 0 | 1 |
| SYT4       | chr18 | 40857219/C//T     | nonsynonymous | 0 | 1 |
| PDE4A      | chr19 | 10559813/G//A     | nonsynonymous | 0 | 1 |
| ZSWIM4     | chr19 | 13941909/G//A     | synonymous    | 0 | 1 |
| LILRA1     | chr19 | 55106722/C//T     | synonymous    | 0 | 1 |
| NCAM2      | chr21 | 22782747/A//T     | nonsynonymous | 0 | 1 |
| TIAM1      | chr21 | 32624335/C//T     | synonymous    | 0 | 1 |
| MID1       | chrX  | 10535293/C//T     | nonsynonymous | 0 | 1 |
| HS6ST2     | chrX  | 132092561/G//A    | nonsynonymous | 0 | 1 |
| MAGEC2     | chrX  | 141290955/G//C    | synonymous    | 0 | 1 |
| AFF2       | chrX  | 148039947/C//A    | nonsynonymous | 0 | 1 |
| MAGEA8     | chrX  | 149013066/G//T    | nonsynonymous | 0 | 1 |
| CNGA2      | chrX  | 150912504/A//G    | nonsynonymous | 0 | 1 |
| ZNF185     | chrX  | 152097142/G//A    | nonsynonymous | 0 | 1 |
| INPP5B     | chr1  | 38348496/G//T     | nonsynonymous | 0 | 1 |
| LYSMD1     | chr1  | 151134475/G//T    | nonsynonymous | 0 | 1 |
| GLI2       | chr2  | 121746594/T//C    | nonsynonymous | 0 | 1 |
| TTN        | chr2  | 179430120/C//A    | nonsynonymous | 0 | 1 |
| ZNF717     | chr3  | 75786042/G//A     | nonsynonymous | 0 | 1 |
| ZNF717     | chr3  | 75786059/C//T     | synonymous    | 0 | 1 |
| ZNF717     | chr3  | 75786071/C//A     | nonsynonymous | 0 | 1 |
| PI4K2B     | chr4  | 25256710/C//A     | synonymous    | 0 | 1 |
| TBC1D19    | chr4  | 26675480/T//C     | synonymous    | 0 | 1 |
| ANK2       | chr4  | 114278787/G//A    | nonsynonymous | 0 | 1 |
| PPP2CA     | chr5  | 133536123/C//T    | nonsynonymous | 0 | 1 |
| PCDHB13    | chr5  | 140595360/C//T    | synonymous    | 0 | 1 |
| ITK        | chr5  | 156679654/G//A    | nonsynonymous | 0 | 1 |
| FAF2       | chr5  | 175934053/ATAT//A | synonymous    | 0 | 1 |
| COL11A2    | chr6  | 33136485/G//T     | nonsynonymous | 0 | 1 |
| TRMT11     | chr6  | 126307689/C//T    | synonymous    | 0 | 1 |
| MAD1L1     | chr7  | 2041758/T//C      | nonsynonymous | 0 | 1 |
| ACTL6B     | chr7  | 100253425/C//G    | nonsynonymous | 0 | 1 |
| EPHB6      | chr7  | 142561875/G//T    | nonsynonymous | 0 | 1 |
| TRPV6      | chr7  | 142569542/C//T    | nonsynonymous | 0 | 1 |
| POTEA      | chr8  | 43152158/C//A     | synonymous    | 0 | 1 |
| KLHL38     | chr8  | 124664843/C//T    | nonsynonymous | 0 | 1 |
| TAF5       | chr10 | 105145255/C//T    | synonymous    | 0 | 1 |
| MYOD1      | chr11 | 17742502/C//T     | synonymous    | 0 | 1 |
| TMEM151A   | chr11 | 66062950/C//T     | synonymous    | 0 | 1 |
| BBS1       | chr11 | 66283410/A//G     | synonymous    | 0 | 1 |
| TECTA      | chr11 | 120989027/G//A    | nonsynonymous | 0 | 1 |
| DPY19L2    | chr12 | 63974603/A//G     | nonsynonymous | 0 | 1 |
| PPP1CC     | chr12 | 111157895/T//C    | synonymous    | 0 | 1 |
| PARP4      | chr13 | 25033444/G//A     | nonsynonymous | 0 | 1 |
| SAMD4A     | chr14 | 55241822/CT//C    | nonsynonymous | 0 | 1 |
| RGMA       | chr15 | 93588783/T//C     | synonymous    | 0 | 1 |
| BCL7C      | chr16 | 30903974/C//T     | synonymous    | 0 | 1 |
| CCDC40     | chr17 | 78071113/C//A     | nonsynonymous | 0 | 1 |
| MUC16      | chr19 | 9033248/G//T      | nonsynonymous | 0 | 1 |
| KLK7       | chr19 | 51487126/A//G     | synonymous    | 0 | 1 |
| ZFP28      | chr19 | 57061890/G//A     | nonsynonymous | 0 | 1 |
| KIF16B     | chr20 | 16492165/C//A     | nonsynonymous | 0 | 1 |
| TPTE       | chr21 | 10908896/C//A     | nonsynonymous | 0 | 1 |
| RPS6KA6    | chrX  | 83357077/G//A     | nonsynonymous | 0 | 1 |
| ARMCX4     | chrX  | 100743633/C//A    | synonymous    | 0 | 1 |

|            |       |                |               |   |   |
|------------|-------|----------------|---------------|---|---|
| CELA3B     | chr1  | 22313034/G//C  | nonsynonymous | 0 | 1 |
| KDM4A      | chr1  | 44133562/G//A  | synonymous    | 0 | 1 |
| CC2D1B     | chr1  | 52820607/A//G  | synonymous    | 0 | 1 |
| UCK2       | chr1  | 165865424/C//T | synonymous    | 0 | 1 |
| MAP4K4     | chr2  | 102450875/A//G | nonsynonymous | 0 | 1 |
| RHBDD1     | chr2  | 227729455/C//A | nonsynonymous | 0 | 1 |
| ZIC1       | chr3  | 147128358/C//T | synonymous    | 0 | 1 |
| PTPN13     | chr4  | 87655539/A//G  | nonsynonymous | 0 | 1 |
| MANBA      | chr4  | 103585980/G//T | synonymous    | 0 | 1 |
| RXFP1      | chr4  | 159569665/G//A | nonsynonymous | 0 | 1 |
| PRDM9      | chr5  | 23524440/C//A  | synonymous    | 0 | 1 |
| MUC22      | chr6  | 30995078/G//A  | nonsynonymous | 0 | 1 |
| MUC22      | chr6  | 30995080/G//C  | nonsynonymous | 0 | 1 |
| NOTCH4     | chr6  | 32169865/G//A  | nonsynonymous | 0 | 1 |
| EYS        | chr6  | 65622601/C//A  | nonsynonymous | 0 | 1 |
| WASF1      | chr6  | 110434573/C//T | nonsynonymous | 0 | 1 |
| CCR6       | chr6  | 167550167/C//T | nonsynonymous | 0 | 1 |
| BAZ1B      | chr7  | 72891640/A//C  | synonymous    | 0 | 1 |
| CSMD3      | chr8  | 113332217/A//C | synonymous    | 0 | 1 |
| NDOR1      | chr9  | 140109288/A//G | nonsynonymous | 0 | 1 |
| OR52L1     | chr11 | 6007523/T//A   | nonsynonymous | 0 | 1 |
| OR5AN1     | chr11 | 59132672/A//G  | synonymous    | 0 | 1 |
| GDPD5      | chr11 | 75146518/G//C  | synonymous    | 0 | 1 |
| IQSEC3     | chr12 | 247927/C//T    | synonymous    | 0 | 1 |
| MBD6       | chr12 | 57919636/G//A  | nonsynonymous | 0 | 1 |
| NAA25      | chr12 | 112513538/C//T | synonymous    | 0 | 1 |
| SERTM1     | chr13 | 37269146/C//A  | synonymous    | 0 | 1 |
| MYH6       | chr14 | 23853924/G//A  | synonymous    | 0 | 1 |
| TGM7       | chr15 | 43579514/C//T  | nonsynonymous | 0 | 1 |
| IGFALS     | chr16 | 1840942/G//T   | nonsynonymous | 0 | 1 |
| ACSM1      | chr16 | 20651826/C//T  | nonsynonymous | 0 | 1 |
| EEF2K      | chr16 | 22291519/G//C  | nonsynonymous | 0 | 1 |
| FANCA      | chr16 | 89883001/T//C  | nonsynonymous | 0 | 1 |
| GRB7       | chr17 | 37900456/C//G  | nonsynonymous | 0 | 1 |
| DNAH17     | chr17 | 76533466/A//G  | nonsynonymous | 0 | 1 |
| RPTOR      | chr17 | 78858924/C//T  | synonymous    | 0 | 1 |
| ELAC1      | chr18 | 48513179/G//A  | synonymous    | 0 | 1 |
| ZNF358     | chr19 | 7585709/T//C   | synonymous    | 0 | 1 |
| IL12RB1    | chr19 | 18179307/C//G  | nonsynonymous | 0 | 1 |
| SAMSN1     | chr21 | 15858259/T//A  | nonsynonymous | 0 | 1 |
| DEPDC5     | chr22 | 32302495/A//G  | synonymous    | 0 | 1 |
| EFCAB6     | chr22 | 43933328/C//T  | nonsynonymous | 0 | 1 |
| FAM9B      | chrX  | 9001022/C//T   | synonymous    | 0 | 1 |
| PABPC5     | chrX  | 90690776/G//T  | nonsynonymous | 0 | 1 |
| PRAMEF1    | chr1  | 12854530/C//G  | nonsynonymous | 0 | 1 |
| MTHFD2     | chr2  | 74441262/A//G  | nonsynonymous | 0 | 1 |
| POTEE      | chr2  | 131976292/T//C | nonsynonymous | 0 | 1 |
| NMI        | chr2  | 152132156/A//G | nonsynonymous | 0 | 1 |
| PMS1       | chr2  | 190719819/A//G | synonymous    | 0 | 1 |
| WDR17      | chr4  | 177046439/C//A | synonymous    | 0 | 1 |
| SEMA6A     | chr5  | 115782419/G//A | synonymous    | 0 | 1 |
| PCDHA10    | chr5  | 140236219/C//T | nonsynonymous | 0 | 1 |
| SH3RF2     | chr5  | 145439782/G//A | nonsynonymous | 0 | 1 |
| NFKBIE     | chr6  | 44233189/G//A  | synonymous    | 0 | 1 |
| PAQR8      | chr6  | 52268020/C//T  | synonymous    | 0 | 1 |
| FAM184A    | chr6  | 119300649/G//T | nonsynonymous | 0 | 1 |
| PRKAR1B    | chr7  | 720200/A//G    | nonsynonymous | 0 | 1 |
| PTPRZ1     | chr7  | 121679583/C//A | nonsynonymous | 0 | 1 |
| SLC25A37   | chr8  | 23429097/C//A  | nonsynonymous | 0 | 1 |
| SLC18A2    | chr10 | 119013956/G//T | nonsynonymous | 0 | 1 |
| OR5P3      | chr11 | 7846745/A//G   | nonsynonymous | 0 | 1 |
| ADCY6      | chr12 | 49164680/C//T  | nonsynonymous | 0 | 1 |
| COQ5       | chr12 | 120960166/A//G | nonsynonymous | 0 | 1 |
| BIVM-ERCC5 | chr13 | 103527666/C//T | nonsynonymous | 0 | 1 |
| PPP2R3C    | chr14 | 35585829/C//T  | nonsynonymous | 0 | 1 |
| CORO6      | chr17 | 27944639/T//C  | nonsynonymous | 0 | 1 |
| ZNF135     | chr19 | 58570679/G//A  | nonsynonymous | 0 | 1 |
| BAGE3      | chr21 | 11058248/G//A  | synonymous    | 0 | 1 |
| SEC14L2    | chr22 | 30803125/T//C  | synonymous    | 0 | 1 |
| CCNB3      | chrX  | 50094622/G//A  | nonsynonymous | 0 | 1 |

|           |       |                 |               |   |   |
|-----------|-------|-----------------|---------------|---|---|
| ALG13     | chrX  | 110971470/C//T  | nonsynonymous | 0 | 1 |
| ZNF185    | chrX  | 152090804/A//G  | synonymous    | 0 | 1 |
| DPYD      | chr1  | 97544644/C//T   | nonsynonymous | 0 | 1 |
| RGS4      | chr1  | 163039301/G//A  | synonymous    | 0 | 1 |
| MYOC      | chr1  | 171621174/C//T  | nonsynonymous | 0 | 1 |
| WNT10A    | chr2  | 219747043/G//A  | nonsynonymous | 0 | 1 |
| ILKAP     | chr2  | 239093880/T//C  | synonymous    | 0 | 1 |
| OSBPL10   | chr3  | 31921235/A//C   | synonymous    | 0 | 1 |
| ZNF197    | chr3  | 44688028/G//A   | synonymous    | 0 | 1 |
| CC2D2A    | chr4  | 15599051/C//T   | nonsynonymous | 0 | 1 |
| ANK2      | chr4  | 114279295/C//T  | nonsynonymous | 0 | 1 |
| ANKRD31   | chr5  | 74400466/C//T   | nonsynonymous | 0 | 1 |
| APC       | chr5  | 112176020/GA//G | nonsynonymous | 0 | 1 |
| PCDHA6    | chr5  | 140207609/C//T  | synonymous    | 0 | 1 |
| PRRC2A    | chr6  | 31601740/C//T   | nonsynonymous | 0 | 1 |
| ADGRB3    | chr6  | 70071251/C//G   | nonsynonymous | 0 | 1 |
| GRIK2     | chr6  | 102516279/C//T  | nonsynonymous | 0 | 1 |
| LAMA2     | chr6  | 129704345/G//T  | nonsynonymous | 0 | 1 |
| SYNE1     | chr6  | 152603121/G//C  | synonymous    | 0 | 1 |
| SYNE1     | chr6  | 152861133/G//A  | nonsynonymous | 0 | 1 |
| LAMB1     | chr7  | 107600203/G//A  | synonymous    | 0 | 1 |
| SOX17     | chr8  | 55370863/G//A   | synonymous    | 0 | 1 |
| MOB3B     | chr9  | 27455594/C//T   | synonymous    | 0 | 1 |
| PCSK5     | chr9  | 78547404/G//GA  | synonymous    | 0 | 1 |
| KCNT1     | chr9  | 138660705/G//A  | nonsynonymous | 0 | 1 |
| RBMXL2    | chr11 | 7110849/G//A    | synonymous    | 0 | 1 |
| AGBL2     | chr11 | 47698916/C//T   | nonsynonymous | 0 | 1 |
| CWC15     | chr11 | 94699549/C//T   | nonsynonymous | 0 | 1 |
| OR10S1    | chr11 | 123847954/C//T  | nonsynonymous | 0 | 1 |
| ACTR10    | chr14 | 58690341/G//A   | synonymous    | 0 | 1 |
| SIX6      | chr14 | 60976625/C//T   | nonsynonymous | 0 | 1 |
| FAM227B   | chr15 | 49620866/C//T   | nonsynonymous | 0 | 1 |
| CNTNAP4   | chr16 | 76311635/G//A   | synonymous    | 0 | 1 |
| CSH1      | chr17 | 61973942/T//A   | synonymous    | 0 | 1 |
| WDR7      | chr18 | 54444034/C//T   | nonsynonymous | 0 | 1 |
| ZNF20     | chr19 | 12244616/C//T   | nonsynonymous | 0 | 1 |
| CYP4F12   | chr19 | 15807894/G//T   | nonsynonymous | 0 | 1 |
| SYNJ1     | chr21 | 34018017/C//T   | synonymous    | 0 | 1 |
| TSPEAR    | chr21 | 45919566/G//T   | synonymous    | 0 | 1 |
| OTUD5     | chrX  | 48814388/T//G   | nonsynonymous | 0 | 1 |
| RPS6KA6   | chrX  | 83403107/C//T   | nonsynonymous | 0 | 1 |
| MAP7D3    | chrX  | 135323365/T//C  | synonymous    | 0 | 1 |
| VPS13D    | chr1  | 12353595/A//G   | nonsynonymous | 0 | 1 |
| RBM44     | chr2  | 238726845/C//T  | nonsynonymous | 0 | 1 |
| DAG1      | chr3  | 49569331/A//G   | nonsynonymous | 0 | 1 |
| CC2D2A    | chr4  | 15538699/A//G   | synonymous    | 0 | 1 |
| RSPH3     | chr6  | 159403579/T//C  | nonsynonymous | 0 | 1 |
| EPHB6     | chr7  | 142568064/G//A  | nonsynonymous | 0 | 1 |
| MBOAT4    | chr8  | 29996089/C//T   | synonymous    | 0 | 1 |
| GHITM     | chr10 | 85909880/A//G   | nonsynonymous | 0 | 1 |
| TCIRG1    | chr11 | 67817215/G//A   | nonsynonymous | 0 | 1 |
| AVIL      | chr12 | 58203626/C//T   | nonsynonymous | 0 | 1 |
| MGA       | chr15 | 42000392/C//T   | nonsynonymous | 0 | 1 |
| ANKDD1A   | chr15 | 65242165/C//T   | synonymous    | 0 | 1 |
| ITGAE     | chr17 | 3620035/C//T    | nonsynonymous | 0 | 1 |
| LRRRC37A3 | chr17 | 62893331/C//T   | synonymous    | 0 | 1 |
| ZNF91     | chr19 | 23543263/C//T   | nonsynonymous | 0 | 1 |
| ZNF528    | chr19 | 52919325/G//A   | nonsynonymous | 0 | 1 |
| TMEM255A  | chrX  | 119419077/G//T  | synonymous    | 0 | 1 |
| LRRRC38   | chr1  | 13802561/T//C   | nonsynonymous | 0 | 1 |
| MUTYH     | chr1  | 45799093/T//C   | nonsynonymous | 0 | 1 |
| MYSM1     | chr1  | 59147985/T//G   | nonsynonymous | 0 | 1 |
| GBP5      | chr1  | 89729430/T//A   | nonsynonymous | 0 | 1 |
| RNPC3     | chr1  | 104094349/G//C  | nonsynonymous | 0 | 1 |
| NBPF8     | chr1  | 144621658/T//G  | nonsynonymous | 0 | 1 |
| LCE2C     | chr1  | 152648569/T//A  | synonymous    | 0 | 1 |
| SCAMP3    | chr1  | 155228743/G//A  | nonsynonymous | 0 | 1 |
| OR6N1     | chr1  | 158736147/G//A  | nonsynonymous | 0 | 1 |
| POGK      | chr1  | 166819586/G//T  | nonsynonymous | 0 | 1 |
| KCNT2     | chr1  | 196250113/T//C  | synonymous    | 0 | 1 |

|          |       |                            |               |   |   |
|----------|-------|----------------------------|---------------|---|---|
| C1orf116 | chr1  | 207196244/G//A             | nonsynonymous | 0 | 1 |
| TMEM131  | chr2  | 98413855/C//T              | nonsynonymous | 0 | 1 |
| IL1RL1   | chr2  | 102968245/G//T             | nonsynonymous | 0 | 1 |
| EVX2     | chr2  | 176948176/G//T             | nonsynonymous | 0 | 1 |
| CARF     | chr2  | 203836232/T//C             | nonsynonymous | 0 | 1 |
| MAP2     | chr2  | 210561765/G//A             | synonymous    | 0 | 1 |
| SP140    | chr2  | 231120238/C//T             | nonsynonymous | 0 | 1 |
| EOMES    | chr3  | 27763427/G//C              | nonsynonymous | 0 | 1 |
| FAM19A1  | chr3  | 68466564/G//A              | nonsynonymous | 0 | 1 |
| HAUS3    | chr4  | 2241787/C//G               | nonsynonymous | 0 | 1 |
| FREM3    | chr4  | 144617847/G//A             | nonsynonymous | 0 | 1 |
| GLRA3    | chr4  | 175565216/C//T             | nonsynonymous | 0 | 1 |
| FAT1     | chr4  | 187540068/TTTCTCGATCAAG//T | nonsynonymous | 0 | 1 |
| FRG2     | chr4  | 190948352/T//A             | nonsynonymous | 0 | 1 |
| RXFP3    | chr5  | 33937865/G//T              | synonymous    | 0 | 1 |
| SCAMP1   | chr5  | 77656534/T//C              | synonymous    | 0 | 1 |
| HSD17B4  | chr5  | 118829509/C//G             | synonymous    | 0 | 1 |
| RAD50    | chr5  | 131915051/T//G             | nonsynonymous | 0 | 1 |
| PCDHGA6  | chr5  | 140754276/G//A             | nonsynonymous | 0 | 1 |
| MGAT1    | chr5  | 180218699/G//A             | nonsynonymous | 0 | 1 |
| SYCP2L   | chr6  | 10959016/G//C              | nonsynonymous | 0 | 1 |
| SCGN     | chr6  | 25701495/G//A              | nonsynonymous | 0 | 1 |
| ZKSCAN8  | chr6  | 28121893/C//A              | synonymous    | 0 | 1 |
| CDC5L    | chr6  | 44394293/C//G              | nonsynonymous | 0 | 1 |
| ENPP5    | chr6  | 46135255/A//G              | synonymous    | 0 | 1 |
| RSPH4A   | chr6  | 116943973/GCGTC//G         | nonsynonymous | 0 | 1 |
| CARD11   | chr7  | 2962266/A//T               | nonsynonymous | 0 | 1 |
| TYW1     | chr7  | 66482898/G//A              | nonsynonymous | 0 | 1 |
| AUTS2    | chr7  | 69064955/G//A              | synonymous    | 0 | 1 |
| MUC17    | chr7  | 100680299/G//C             | nonsynonymous | 0 | 1 |
| MUC17    | chr7  | 100680313/A//G             | nonsynonymous | 0 | 1 |
| TRIM56   | chr7  | 100732173/A//C             | nonsynonymous | 0 | 1 |
| HBP1     | chr7  | 106829753/G//C             | nonsynonymous | 0 | 1 |
| KCNH2    | chr7  | 150648736/C//T             | nonsynonymous | 0 | 1 |
| HEY1     | chr8  | 80677647/C//A              | nonsynonymous | 0 | 1 |
| RALYL    | chr8  | 85441637/T//C              | synonymous    | 0 | 1 |
| RGS22    | chr8  | 100977666/T//G             | synonymous    | 0 | 1 |
| PKHD1L1  | chr8  | 110456029/T//C             | synonymous    | 0 | 1 |
| FRMPD1   | chr9  | 37746153/C//T              | nonsynonymous | 0 | 1 |
| AKR1C4   | chr10 | 5254670/C//A               | nonsynonymous | 0 | 1 |
| MORN4    | chr10 | 99379362/G//A              | nonsynonymous | 0 | 1 |
| GPR26    | chr10 | 125426542/G//A             | nonsynonymous | 0 | 1 |
| PKP3     | chr11 | 400618/G//A                | synonymous    | 0 | 1 |
| GALNT18  | chr11 | 11400819/G//T              | synonymous    | 0 | 1 |
| LUZP2    | chr11 | 24750780/G//A              | nonsynonymous | 0 | 1 |
| FLRT1    | chr11 | 63885482/C//T              | synonymous    | 0 | 1 |
| RAD9A    | chr11 | 67164800/C//T              | synonymous    | 0 | 1 |
| DDI1     | chr11 | 103907619/C//T             | synonymous    | 0 | 1 |
| FAR2     | chr12 | 29469913/C//G              | nonsynonymous | 0 | 1 |
| LRRK2    | chr12 | 40702925/A//G              | nonsynonymous | 0 | 1 |
| FAM186A  | chr12 | 50749751/A//G              | synonymous    | 0 | 1 |
| OR9K2    | chr12 | 55524558/T//C              | nonsynonymous | 0 | 1 |
| TPH2     | chr12 | 72425445/A//C              | nonsynonymous | 0 | 1 |
| OTOGL    | chr12 | 80615924/C//A              | nonsynonymous | 0 | 1 |
| PLXNC1   | chr12 | 94603431/G//C              | nonsynonymous | 0 | 1 |
| SLC5A8   | chr12 | 101598313/G//A             | nonsynonymous | 0 | 1 |
| GOLGA3   | chr12 | 133349592/A//T             | synonymous    | 0 | 1 |
| PCDH8    | chr13 | 53421105/G//A              | synonymous    | 0 | 1 |
| PCDH17   | chr13 | 58208780/C//G              | nonsynonymous | 0 | 1 |
| ITGBL1   | chr13 | 102227855/G//A             | nonsynonymous | 0 | 1 |
| IRF2BPL  | chr14 | 77492342/C//T              | synonymous    | 0 | 1 |
| WDR24    | chr16 | 737323/G//A                | synonymous    | 0 | 1 |
|          | chr16 | 28884515/C//T              | synonymous    | 0 | 1 |
| CDH11    | chr16 | 65022055/C//A              | synonymous    | 0 | 1 |
| SLC22A31 | chr16 | 89265448/G//T              | synonymous    | 0 | 1 |
| MYH13    | chr17 | 10222374/G//T              | synonymous    | 0 | 1 |
| RHBDL3   | chr17 | 30648020/G//A              | synonymous    | 0 | 1 |
| ITGA3    | chr17 | 48154017/G//A              | nonsynonymous | 0 | 1 |
| ABCA10   | chr17 | 67189713/T//G              | nonsynonymous | 0 | 1 |
| ALPK2    | chr18 | 56204912/C//G              | nonsynonymous | 0 | 1 |

|          |       |                           |               |   |   |
|----------|-------|---------------------------|---------------|---|---|
| TPGS1    | chr19 | 518944/C//T               | nonsynonymous | 0 | 1 |
| ATP8B3   | chr19 | 1808340/A//G              | synonymous    | 0 | 1 |
| ZNF726   | chr19 | 24115679/A//G             | nonsynonymous | 0 | 1 |
| NLRP2    | chr19 | 55494947/A//C             | nonsynonymous | 0 | 1 |
| ZNF337   | chr20 | 25656991/C//G             | nonsynonymous | 0 | 1 |
| BPIFA3   | chr20 | 31805365/T//C             | nonsynonymous | 0 | 1 |
| RALGAPB  | chr20 | 37202853/A//G             | synonymous    | 0 | 1 |
| ADNP     | chr20 | 49508232/T//C             | nonsynonymous | 0 | 1 |
| NCAM2    | chr21 | 22664433/C//T             | nonsynonymous | 0 | 1 |
| MXRA5    | chrX  | 3238549/G//T              | nonsynonymous | 0 | 1 |
| CFAP47   | chrX  | 36103526/A//G             | nonsynonymous | 0 | 1 |
| NUP62CL  | chrX  | 106397472/C//G            | nonsynonymous | 0 | 1 |
| MAGEC2   | chrX  | 141291657/G//C            | synonymous    | 0 | 1 |
| ZFY      | chrY  | 2844843/T//G              | nonsynonymous | 0 | 1 |
| CAMTA1   | chr1  | 7724661/C//T              | nonsynonymous | 0 | 1 |
| LRP8     | chr1  | 53728212/C//T             | synonymous    | 0 | 1 |
| SDCCAG8  | chr1  | 243468033/T//G            | nonsynonymous | 0 | 1 |
| LRP2     | chr2  | 170048434/G//A            | synonymous    | 0 | 1 |
| SPEG     | chr2  | 220313045/C//T            | nonsynonymous | 0 | 1 |
| MST1     | chr3  | 49723782/T//C             | nonsynonymous | 0 | 1 |
| GFM2     | chr5  | 74026131/G//A             | synonymous    | 0 | 1 |
| PCDHA9   | chr5  | 140229362/C//T            | nonsynonymous | 0 | 1 |
| NSD1     | chr5  | 176662828/G//A            | nonsynonymous | 0 | 1 |
| TRIM38   | chr6  | 25966908/G//A             | nonsynonymous | 0 | 1 |
| PHF1     | chr6  | 33383777/C//T             | synonymous    | 0 | 1 |
| AMZ1     | chr7  | 2742379/A//C              | nonsynonymous | 0 | 1 |
| FAM188B  | chr7  | 30890150/G//A             | nonsynonymous | 0 | 1 |
| EBF2     | chr8  | 25899604/C//T             | synonymous    | 0 | 1 |
| ELP3     | chr8  | 27964289/A//G             | synonymous    | 0 | 1 |
| HTRA4    | chr8  | 38831710/A//G             | synonymous    | 0 | 1 |
| TSPYL5   | chr8  | 98289905/G//A             | synonymous    | 0 | 1 |
| GPR107   | chr9  | 132816332/G//T            | nonsynonymous | 0 | 1 |
| AP3M1    | chr10 | 75896414/G//A             | nonsynonymous | 0 | 1 |
| ST5      | chr11 | 8732781/G//T              | synonymous    | 0 | 1 |
| AKAP3    | chr12 | 4736440/C//A              | nonsynonymous | 0 | 1 |
| CNTN1    | chr12 | 41408023/G//T             | synonymous    | 0 | 1 |
| UBC      | chr12 | 125396902/T//C            | synonymous    | 0 | 1 |
| SOS2     | chr14 | 50655424/A//G             | synonymous    | 0 | 1 |
| VPS39    | chr15 | 42456660/T//C             | nonsynonymous | 0 | 1 |
| ABCC12   | chr16 | 48119514/C//T             | nonsynonymous | 0 | 1 |
| KISS1R   | chr19 | 917587/G//A               | nonsynonymous | 0 | 1 |
| ZNF90    | chr19 | 20216132/G//A             | synonymous    | 0 | 1 |
| ADAM33   | chr20 | 3651662/G//A              | nonsynonymous | 0 | 1 |
| MBTPS2   | chrX  | 21887662/T//C             | nonsynonymous | 0 | 1 |
| DCAF8L1  | chrX  | 27997984/G//T             | nonsynonymous | 0 | 1 |
| NYX      | chrX  | 41333489/G//T             | synonymous    | 0 | 1 |
| VAMP7    | chrX  | 155127842/G//A            | nonsynonymous | 0 | 1 |
| ATP13A2  | chr1  | 17316482/GCAGCCTGGTCAGGA  | nonsynonymous | 0 | 1 |
| SLC9C2   | chr1  | 173472456/T//C            | nonsynonymous | 0 | 1 |
| ZNF648   | chr1  | 182025734/G//A            | nonsynonymous | 0 | 1 |
| PTPRC    | chr1  | 198713209/T//A            | synonymous    | 0 | 1 |
| SIX3     | chr2  | 45170034/CGGCGGCCAA//C    | nonsynonymous | 0 | 1 |
| PPP4R3B  | chr2  | 55826111/C//T             | nonsynonymous | 0 | 1 |
| IGFBP5   | chr2  | 217543705/G//T            | synonymous    | 0 | 1 |
| IGFBP5   | chr2  | 217543709/A//C            | nonsynonymous | 0 | 1 |
| IGFBP5   | chr2  | 217543710/TGCGGGTGTGTTTGC | nonsynonymous | 0 | 1 |
| CUL3     | chr2  | 225346704/G//T            | nonsynonymous | 0 | 1 |
| SCAP     | chr3  | 47463998/CATGATGG//C      | nonsynonymous | 0 | 1 |
| NMNAT3   | chr3  | 139279975/C//G            | synonymous    | 0 | 1 |
| CLSTN2   | chr3  | 140167547/G//T            | nonsynonymous | 0 | 1 |
| MED12L   | chr3  | 151105838/C//G            | nonsynonymous | 0 | 1 |
| NUP54    | chr4  | 77039339/G//A             | synonymous    | 0 | 1 |
| TRIML1   | chr4  | 189068012/A//G            | nonsynonymous | 0 | 1 |
| PCDHGC5  | chr5  | 140871078/C//T            | synonymous    | 0 | 1 |
| HIST1H4F | chr6  | 26240894/A//G             | nonsynonymous | 0 | 1 |
| C6orf89  | chr6  | 36887349/TC//T            | synonymous    | 0 | 1 |
| PKHD1    | chr6  | 51524322/G//T             | nonsynonymous | 0 | 1 |
| PKHD1    | chr6  | 51735420/T//C             | synonymous    | 0 | 1 |
| AKAP9    | chr7  | 91630223/T//C             | nonsynonymous | 0 | 1 |
| SVOPL    | chr7  | 138333845/A//G            | nonsynonymous | 0 | 1 |

|           |       |                            |               |   |   |
|-----------|-------|----------------------------|---------------|---|---|
| RIPK2     | chr8  | 90775204/A//G              | synonymous    | 0 | 1 |
| RNF19A    | chr8  | 101270867/A//C             | nonsynonymous | 0 | 1 |
| MCMBP     | chr10 | 121598061/T//C             | nonsynonymous | 0 | 1 |
| OR4C11    | chr11 | 55371106/G//T              | nonsynonymous | 0 | 1 |
| OSBP      | chr11 | 59368019/T//C              | nonsynonymous | 0 | 1 |
| KMT5B     | chr11 | 67925927/G//C              | nonsynonymous | 0 | 1 |
| ZFC3H1    | chr12 | 72008437/TGTTTCTGGATCCA//T | nonsynonymous | 0 | 1 |
| RALGAPA1  | chr14 | 36194328/T//C              | nonsynonymous | 0 | 1 |
| ZBTB1     | chr14 | 64989053/TTCTGCACA//T      | nonsynonymous | 0 | 1 |
| NFAT5     | chr16 | 69726598/T//A              | nonsynonymous | 0 | 1 |
| USP32     | chr17 | 58290970/G//T              | synonymous    | 0 | 1 |
| DCC       | chr18 | 50741946/C//T              | synonymous    | 0 | 1 |
| PALM      | chr19 | 734172/G//C                | nonsynonymous | 0 | 1 |
| CPAMD8    | chr19 | 17017834/C//T              | nonsynonymous | 0 | 1 |
| WDR87     | chr19 | 38375926/C//T              | synonymous    | 0 | 1 |
| ZNF845    | chr19 | 53855029/A//C              | nonsynonymous | 0 | 1 |
| LILRB2    | chr19 | 54781761/C//T              | nonsynonymous | 0 | 1 |
| GDAP1L1   | chr20 | 42907841/G//A              | synonymous    | 0 | 1 |
| ADNP      | chr20 | 49510859/G//A              | nonsynonymous | 0 | 1 |
| PAGE1     | chrX  | 49459312/T//A              | nonsynonymous | 0 | 1 |
| GPR173    | chrX  | 53106920/A//T              | nonsynonymous | 0 | 1 |
| NEXN      | chr1  | 78407879/G//A              | nonsynonymous | 0 | 1 |
| COL11A1   | chr1  | 103540216/G//C             | nonsynonymous | 0 | 1 |
| SCN1A     | chr2  | 166848842/C//T             | nonsynonymous | 0 | 1 |
| PIKFYVE   | chr2  | 209179106/G//A             | synonymous    | 0 | 1 |
| MRPL47    | chr3  | 179306730/C//A             | nonsynonymous | 0 | 1 |
| KDR       | chr4  | 55973990/C//G              | synonymous    | 0 | 1 |
| SLC4A4    | chr4  | 72432748/G//A              | nonsynonymous | 0 | 1 |
| DNAH5     | chr5  | 13776589/A//G              | nonsynonymous | 0 | 1 |
| IQGAP2    | chr5  | 75991435/A//G              | nonsynonymous | 0 | 1 |
| CDHR2     | chr5  | 176011529/G//A             | synonymous    | 0 | 1 |
| KRBA1     | chr7  | 149427259/G//A             | synonymous    | 0 | 1 |
| SSPO      | chr7  | 149519637/G//A             | nonsynonymous | 0 | 1 |
| ADCY8     | chr8  | 132002775/G//T             | nonsynonymous | 0 | 1 |
| CNTNAP3   | chr9  | 39103763/A//G              | synonymous    | 0 | 1 |
| CIZ1      | chr9  | 130938724/G//C             | nonsynonymous | 0 | 1 |
| ITIH5     | chr10 | 7708826/C//T               | synonymous    | 0 | 1 |
| TET1      | chr10 | 70333434/T//A              | nonsynonymous | 0 | 1 |
| MMS19     | chr10 | 99230532/C//T              | synonymous    | 0 | 1 |
| MYBPC3    | chr11 | 47359100/CTCT//C           | nonsynonymous | 0 | 1 |
| TRIM49    | chr11 | 89531678/T//G              | nonsynonymous | 0 | 1 |
| CD163L1   | chr12 | 7528296/G//T               | synonymous    | 0 | 1 |
| CD163L1   | chr12 | 7585175/A//G               | synonymous    | 0 | 1 |
| ATP8A2    | chr13 | 26402282/T//C              | synonymous    | 0 | 1 |
| NEMF      | chr14 | 50319513/C//G              | synonymous    | 0 | 1 |
|           | chr15 | 75628513/G//A              | synonymous    | 0 | 1 |
| FSD2      | chr15 | 83434735/C//A              | synonymous    | 0 | 1 |
| PRSS36    | chr16 | 31157273/G//A              | nonsynonymous | 0 | 1 |
| SMARCE1   | chr17 | 38802079/C//T              | synonymous    | 0 | 1 |
| ANKRD29   | chr18 | 21218907/C//T              | nonsynonymous | 0 | 1 |
| STXBP2    | chr19 | 7708104/G//A               | synonymous    | 0 | 1 |
| AXL       | chr19 | 41749607/C//A              | nonsynonymous | 0 | 1 |
| FCAR      | chr19 | 55399556/C//T              | nonsynonymous | 0 | 1 |
| FAM209A   | chr20 | 55100941/T//G              | nonsynonymous | 0 | 1 |
| ZNF831    | chr20 | 57768939/C//A              | synonymous    | 0 | 1 |
| BRWD1     | chr21 | 40570928/G//C              | nonsynonymous | 0 | 1 |
| KRTAP10-7 | chr21 | 46020644/C//T              | synonymous    | 0 | 1 |
| CSF2RA    | chrX  | 1409241/A//G               | nonsynonymous | 0 | 1 |
| POF1B     | chrX  | 84534346/A//G              | synonymous    | 0 | 1 |
| HCFC1     | chrX  | 153220119/C//T             | nonsynonymous | 0 | 1 |
| PINK1     | chr1  | 20975612/C//T              | nonsynonymous | 0 | 1 |
| YTHDF2    | chr1  | 29069595/T//C              | synonymous    | 0 | 1 |
| SIKE1     | chr1  | 115321902/A//G             | nonsynonymous | 0 | 1 |
| QSOX1     | chr1  | 180135680/G//A             | nonsynonymous | 0 | 1 |
| RFX8      | chr2  | 102038191/G//A             | nonsynonymous | 0 | 1 |
| CYP20A1   | chr2  | 204161617/T//C             | nonsynonymous | 0 | 1 |
| MAP4      | chr3  | 47969797/T//C              | synonymous    | 0 | 1 |
| KLHDC8B   | chr3  | 49213177/T//C              | synonymous    | 0 | 1 |
| MON1A     | chr3  | 49946481/T//C              | nonsynonymous | 0 | 1 |
| TECLRL    | chr4  | 65180469/C//T              | nonsynonymous | 0 | 1 |

|           |       |                |               |   |   |
|-----------|-------|----------------|---------------|---|---|
| LRIT3     | chr4  | 110791180/T//C | synonymous    | 0 | 1 |
| FAT4      | chr4  | 126372061/G//A | nonsynonymous | 0 | 1 |
| MYO10     | chr5  | 16689934/T//C  | nonsynonymous | 0 | 1 |
| HIST1H1D  | chr6  | 26235059/T//C  | nonsynonymous | 0 | 1 |
| UBR2      | chr6  | 42627423/C//T  | nonsynonymous | 0 | 1 |
| AIM1      | chr6  | 106978139/A//G | nonsynonymous | 0 | 1 |
| CYP2W1    | chr7  | 1026860/G//A   | nonsynonymous | 0 | 1 |
| CCDC90B   | chr11 | 82972912/G//A  | synonymous    | 0 | 1 |
| KRT8      | chr12 | 53295822/T//C  | nonsynonymous | 0 | 1 |
| RPGRIP1   | chr14 | 21762911/G//A  | nonsynonymous | 0 | 1 |
| IPO4      | chr14 | 24652224/G//A  | synonymous    | 0 | 1 |
| SUSD6     | chr14 | 70175467/G//A  | nonsynonymous | 0 | 1 |
| E4F1      | chr16 | 2283567/T//C   | synonymous    | 0 | 1 |
| GALNS     | chr16 | 88907406/C//T  | nonsynonymous | 0 | 1 |
| SGSM3     | chr22 | 40800403/T//C  | nonsynonymous | 0 | 1 |
| ACOT9     | chrX  | 23723644/G//C  | nonsynonymous | 0 | 1 |
| ATP6AP2   | chrX  | 40464884/A//G  | synonymous    | 0 | 1 |
| HDAC6     | chrX  | 48675752/T//C  | nonsynonymous | 0 | 1 |
| PRAMEF4   | chr1  | 12941680/C//A  | synonymous    | 0 | 1 |
| KCNA3     | chr1  | 111216901/G//A | synonymous    | 0 | 1 |
| RFWD2     | chr1  | 176176257/G//C | synonymous    | 0 | 1 |
| TET3      | chr2  | 74273509/G//A  | synonymous    | 0 | 1 |
| DNAH12    | chr3  | 57456171/G//A  | nonsynonymous | 0 | 1 |
| BMP2K     | chr4  | 79747233/T//G  | nonsynonymous | 0 | 1 |
| PCDHGC3   | chr5  | 140856394/G//A | synonymous    | 0 | 1 |
| SOX7      | chr8  | 10584155/G//A  | nonsynonymous | 0 | 1 |
| MMP26     | chr11 | 5012654/T//A   | nonsynonymous | 0 | 1 |
| FANCF     | chr11 | 22646511/A//C  | synonymous    | 0 | 1 |
| ANO3      | chr11 | 26484601/C//T  | nonsynonymous | 0 | 1 |
| KIAA1549L | chr11 | 33667510/G//A  | synonymous    | 0 | 1 |
| TCN1      | chr11 | 59631454/T//G  | nonsynonymous | 0 | 1 |
| RIN1      | chr11 | 66102322/G//A  | synonymous    | 0 | 1 |
| C12orf60  | chr12 | 14976048/T//G  | nonsynonymous | 0 | 1 |
| DENND5B   | chr12 | 31555559/A//G  | nonsynonymous | 0 | 1 |
| USP44     | chr12 | 95927389/C//T  | nonsynonymous | 0 | 1 |
| HECTD1    | chr14 | 31642787/A//G  | nonsynonymous | 0 | 1 |
| TPM1      | chr15 | 63354429/G//A  | nonsynonymous | 0 | 1 |
| MAP2K4    | chr17 | 12028670/G//T  | nonsynonymous | 0 | 1 |
| SPIRE1    | chr18 | 12449800/A//G  | nonsynonymous | 0 | 1 |
| PLIN5     | chr19 | 4531683/G//A   | nonsynonymous | 0 | 1 |
| TSHZ2     | chr20 | 51871248/G//T  | nonsynonymous | 0 | 1 |
|           | chr1  | 6420694/T//C   | synonymous    | 0 | 1 |
| OXCT2     | chr1  | 40235983/G//A  | synonymous    | 0 | 1 |
| BCL9      | chr1  | 147091709/C//T | nonsynonymous | 0 | 1 |
| TNN       | chr1  | 175087903/G//T | nonsynonymous | 0 | 1 |
| GREM2     | chr1  | 240656333/T//G | nonsynonymous | 0 | 1 |
| HEATR5B   | chr2  | 37217794/T//G  | synonymous    | 0 | 1 |
| ANKRD53   | chr2  | 71209151/G//A  | nonsynonymous | 0 | 1 |
| TTC21B    | chr2  | 166737286/A//G | synonymous    | 0 | 1 |
| SLC25A12  | chr2  | 172644390/G//A | synonymous    | 0 | 1 |
| FSIP2     | chr2  | 186657168/C//G | nonsynonymous | 0 | 1 |
| HECW2     | chr2  | 197189872/A//T | nonsynonymous | 0 | 1 |
| CCDC66    | chr3  | 56649169/T//C  | nonsynonymous | 0 | 1 |
| KALRN     | chr3  | 123983480/C//T | synonymous    | 0 | 1 |
| LIPH      | chr3  | 185252683/A//G | nonsynonymous | 0 | 1 |
| NWD2      | chr4  | 37447890/C//T  | nonsynonymous | 0 | 1 |
| ATP8A1    | chr4  | 42424855/G//C  | nonsynonymous | 0 | 1 |
| ANK2      | chr4  | 114275660/T//G | synonymous    | 0 | 1 |
| CDH9      | chr5  | 26881625/C//T  | nonsynonymous | 0 | 1 |
| C5orf42   | chr5  | 37221521/T//C  | nonsynonymous | 0 | 1 |
| SEC24A    | chr5  | 134039496/G//A | nonsynonymous | 0 | 1 |
| OR12D3    | chr6  | 29342986/C//T  | nonsynonymous | 0 | 1 |
| MICA      | chr6  | 31380222/G//A  | nonsynonymous | 0 | 1 |
| BAG6      | chr6  | 31608723/A//G  | synonymous    | 0 | 1 |
| PEX6      | chr6  | 42932552/G//A  | nonsynonymous | 0 | 1 |
| MAP3K5    | chr6  | 137113134/G//T | nonsynonymous | 0 | 1 |
| FNDC1     | chr6  | 159618542/A//T | nonsynonymous | 0 | 1 |
|           | chr7  | 87811379/C//T  | synonymous    | 0 | 1 |
| RAD54B    | chr8  | 95404018/A//G  | nonsynonymous | 0 | 1 |
| POLR3A    | chr10 | 79784862/T//C  | synonymous    | 0 | 1 |

|           |       |                            |               |   |   |
|-----------|-------|----------------------------|---------------|---|---|
| KCNQ1     | chr11 | 2608914/T//C               | nonsynonymous | 0 | 1 |
| OR4C6     | chr11 | 55432790/A//G              | nonsynonymous | 0 | 1 |
| AHNAK     | chr11 | 62301239/G//A              | nonsynonymous | 0 | 1 |
| LRFN4     | chr11 | 66627629/G//A              | nonsynonymous | 0 | 1 |
| PLEKHB1   | chr11 | 73372584/G//A              | nonsynonymous | 0 | 1 |
| FAT3      | chr11 | 92531514/A//C              | nonsynonymous | 0 | 1 |
| KDEL1C    | chr13 | 103449241/A//G             | nonsynonymous | 0 | 1 |
| BIVM      | chr13 | 103468910/G//A             | synonymous    | 0 | 1 |
| GTF3C1    | chr16 | 27483098/C//T              | nonsynonymous | 0 | 1 |
| PLCG2     | chr16 | 81969845/G//A              | nonsynonymous | 0 | 1 |
| RALBP1    | chr18 | 9530855/A//G               | synonymous    | 0 | 1 |
| SMAD2     | chr18 | 45368290/T//TCCAGCAAGGAGTA | nonsynonymous | 0 | 1 |
| SALL3     | chr18 | 76755414/C//T              | synonymous    | 0 | 1 |
| GPI       | chr19 | 34890117/C//A              | synonymous    | 0 | 1 |
| GYS1      | chr19 | 49472836/C//T              | synonymous    | 0 | 1 |
| PRR12     | chr19 | 50101077/C//T              | nonsynonymous | 0 | 1 |
| BMP7      | chr20 | 55777673/C//T              | synonymous    | 0 | 1 |
| KLHDC7B   | chr22 | 50986764/G//A              | nonsynonymous | 0 | 1 |
| USP9X     | chrX  | 41055518/T//C              | nonsynonymous | 0 | 1 |
| TSPYL2    | chrX  | 53115119/C//T              | synonymous    | 0 | 1 |
| NRK       | chrX  | 105190363/A//G             | synonymous    | 0 | 1 |
| SLC45A1   | chr1  | 8384561/C//G               | nonsynonymous | 0 | 1 |
| SGIP1     | chr1  | 67147733/A//C              | nonsynonymous | 0 | 1 |
| GIPC2     | chr1  | 78560669/A//T              | nonsynonymous | 0 | 1 |
| RPAP2     | chr1  | 92772775/T//C              | nonsynonymous | 0 | 1 |
| TMED5     | chr1  | 93620441/G//A              | nonsynonymous | 0 | 1 |
| FMO3      | chr1  | 171083429/C//A             | synonymous    | 0 | 1 |
| PRRC2C    | chr1  | 171492400/G//C             | nonsynonymous | 0 | 1 |
| EIF2D     | chr1  | 206765094/A//G             | synonymous    | 0 | 1 |
| LAMB3     | chr1  | 209797343/C//T             | nonsynonymous | 0 | 1 |
| TRAF3IP3  | chr1  | 209933527/C//A             | nonsynonymous | 0 | 1 |
| NLRP3     | chr1  | 247592921/C//T             | nonsynonymous | 0 | 1 |
| ADD2      | chr2  | 70931598/C//T              | synonymous    | 0 | 1 |
| DCTN1     | chr2  | 74597826/C//A              | nonsynonymous | 0 | 1 |
| LRP2      | chr2  | 170113721/A//C             | nonsynonymous | 0 | 1 |
| TTN       | chr2  | 179504779/T//G             | nonsynonymous | 0 | 1 |
| HDAC11    | chr3  | 13538327/G//A              | nonsynonymous | 0 | 1 |
| GLYCTK    | chr3  | 52326467/C//A              | nonsynonymous | 0 | 1 |
| SIDT1     | chr3  | 113286500/C//T             | nonsynonymous | 0 | 1 |
| KLHL24    | chr3  | 183390154/T//C             | nonsynonymous | 0 | 1 |
| TNK2      | chr3  | 195611741/C//T             | nonsynonymous | 0 | 1 |
| NUDT9     | chr4  | 88362994/C//T              | nonsynonymous | 0 | 1 |
| ANK2      | chr4  | 114277457/A//C             | nonsynonymous | 0 | 1 |
|           | chr4  | 123533996/A//G             | synonymous    | 0 | 1 |
| FAT4      | chr4  | 126411985/A//T             | nonsynonymous | 0 | 1 |
| RBM46     | chr4  | 155717975/C//T             | nonsynonymous | 0 | 1 |
| KLKB1     | chr4  | 187175881/G//A             | nonsynonymous | 0 | 1 |
| ADCY2     | chr5  | 7709500/G//A               | synonymous    | 0 | 1 |
| SEMA5A    | chr5  | 9119162/G//A               | nonsynonymous | 0 | 1 |
| ROPN1L    | chr5  | 10465069/G//T              | synonymous    | 0 | 1 |
| FAM196B   | chr5  | 169309995/G//T             | nonsynonymous | 0 | 1 |
| PKHD1     | chr6  | 51720847/A//C              | synonymous    | 0 | 1 |
| DAGLB     | chr7  | 6485689/C//A               | nonsynonymous | 0 | 1 |
| ZNF716    | chr7  | 57529721/C//T              | synonymous    | 0 | 1 |
| GNAI1     | chr7  | 79840327/G//C              | nonsynonymous | 0 | 1 |
| SEMA3A    | chr7  | 83636759/C//A              | nonsynonymous | 0 | 1 |
| SRI       | chr7  | 87838715/G//T              | synonymous    | 0 | 1 |
| CFAP69    | chr7  | 89915712/A//G              | nonsynonymous | 0 | 1 |
| TBXAS1    | chr7  | 139655357/C//A             | nonsynonymous | 0 | 1 |
| CSMD1     | chr8  | 3165330/A//G               | synonymous    | 0 | 1 |
| TRIM35    | chr8  | 27168600/C//T              | synonymous    | 0 | 1 |
| POU5F1B   | chr8  | 128428581/G//C             | nonsynonymous | 0 | 1 |
| FAM83H    | chr8  | 144810435/G//A             | nonsynonymous | 0 | 1 |
| SPATA31C2 | chr9  | 90747134/A//T              | nonsynonymous | 0 | 1 |
| ABCA1     | chr9  | 107568585/G//A             | synonymous    | 0 | 1 |
| FAM166A   | chr9  | 140140207/G//T             | nonsynonymous | 0 | 1 |
| CDH23     | chr10 | 73461953/G//A              | nonsynonymous | 0 | 1 |
| PLAU      | chr10 | 75672711/G//A              | nonsynonymous | 0 | 1 |
| SORCS3    | chr10 | 107012532/G//T             | nonsynonymous | 0 | 1 |
| CFAP46    | chr10 | 134686336/G//A             | synonymous    | 0 | 1 |



|           |       |                  |               |   |   |
|-----------|-------|------------------|---------------|---|---|
| DCHS1     | chr11 | 6644235/C//A     | nonsynonymous | 0 | 1 |
| CYB5R2    | chr11 | 7686635/A//T     | synonymous    | 0 | 1 |
| TAF1D     | chr11 | 93472420/C//T    | synonymous    | 0 | 1 |
| TRPC6     | chr11 | 101347219/C//G   | nonsynonymous | 0 | 1 |
| CADM1     | chr11 | 115088647/C//T   | synonymous    | 0 | 1 |
| RB1       | chr13 | 49037902/G//A    | synonymous    | 0 | 1 |
| C14orf93  | chr14 | 23456494/T//C    | nonsynonymous | 0 | 1 |
| JPH4      | chr14 | 24040488/C//T    | synonymous    | 0 | 1 |
| AHNAK2    | chr14 | 105444530/G//A   | synonymous    | 0 | 1 |
| UNC13C    | chr15 | 54305975/G//A    | nonsynonymous | 0 | 1 |
| RASGRF1   | chr15 | 79310104/C//G    | synonymous    | 0 | 1 |
| SCNN1G    | chr16 | 23223381/A//C    | synonymous    | 0 | 1 |
| SNTB2     | chr16 | 69318042/A//G    | nonsynonymous | 0 | 1 |
| LIG3      | chr17 | 33326870/C//T    | nonsynonymous | 0 | 1 |
| ABCA8     | chr17 | 66933201/A//C    | nonsynonymous | 0 | 1 |
| CCDC40    | chr17 | 78055849/A//G    | nonsynonymous | 0 | 1 |
| ENDOV     | chr17 | 78410012/C//T    | synonymous    | 0 | 1 |
| MOB3A     | chr19 | 2078284/C//T     | synonymous    | 0 | 1 |
| PIK3R2    | chr19 | 18273784/G//A    | nonsynonymous | 0 | 1 |
| ZNF676    | chr19 | 22375810/T//C    | synonymous    | 0 | 1 |
| KIR3DL2   | chr19 | 55365201/G//A    | nonsynonymous | 0 | 1 |
| ZNF154    | chr19 | 58213218/G//A    | nonsynonymous | 0 | 1 |
| C20orf194 | chr20 | 3233304/C//T     | nonsynonymous | 0 | 1 |
| NCOA6     | chr20 | 33337488/T//C    | nonsynonymous | 0 | 1 |
| CD40      | chr20 | 44747009/C//T    | synonymous    | 0 | 1 |
| PHACTR3   | chr20 | 58420269/A//T    | nonsynonymous | 0 | 1 |
| GRIK1     | chr21 | 30961177/A//T    | synonymous    | 0 | 1 |
| BPIFC     | chr22 | 32831766/G//A    | synonymous    | 0 | 1 |
| CDKL5     | chrX  | 18622187/C//T    | synonymous    | 0 | 1 |
| MTRNR2L10 | chrX  | 55208416/T//C    | synonymous    | 0 | 1 |
| FAM46D    | chrX  | 79698851/T//C    | synonymous    | 0 | 1 |
| MAGEC1    | chrX  | 140993372/A//T   | nonsynonymous | 0 | 1 |
| SV2A      | chr1  | 149881036/G//A   | nonsynonymous | 0 | 1 |
| REG3A     | chr2  | 79385557/C//A    | synonymous    | 0 | 1 |
| EIF5B     | chr2  | 99985055/G//A    | nonsynonymous | 0 | 1 |
| GLI2      | chr2  | 121746637/C//T   | synonymous    | 0 | 1 |
| FRG2C     | chr3  | 75715033/T//C    | synonymous    | 0 | 1 |
| APC       | chr5  | 112175411/G//GA  | nonsynonymous | 0 | 1 |
| KDM3B     | chr5  | 137734080/C//T   | synonymous    | 0 | 1 |
| BCAP29    | chr7  | 107259020/A//G   | synonymous    | 0 | 1 |
| CADPS2    | chr7  | 122091459/AAG//A | nonsynonymous | 0 | 1 |
| SLC1A1    | chr9  | 4573916/A//G     | synonymous    | 0 | 1 |
| PHF2      | chr9  | 96411381/T//C    | synonymous    | 0 | 1 |
| DIP2C     | chr10 | 465011/C//T      | nonsynonymous | 0 | 1 |
| PHYH      | chr10 | 13336420/T//C    | synonymous    | 0 | 1 |
| WDFY4     | chr10 | 50165327/G//A    | nonsynonymous | 0 | 1 |
| CACNA1C   | chr12 | 2675648/T//C     | synonymous    | 0 | 1 |
| HELB      | chr12 | 66718891/T//A    | synonymous    | 0 | 1 |
| SCFD1     | chr14 | 31191086/A//G    | synonymous    | 0 | 1 |
| ARID4A    | chr14 | 58832006/A//G    | nonsynonymous | 0 | 1 |
| VAT1L     | chr16 | 77822654/G//A    | synonymous    | 0 | 1 |
| MKMK2     | chr19 | 2041042/C//T     | synonymous    | 0 | 1 |
| DSCAM     | chr21 | 41427743/C//T    | synonymous    | 0 | 1 |
| SPSB1     | chr1  | 9427658/C//T     | synonymous    | 0 | 1 |
| AIM1L     | chr1  | 26670912/T//C    | nonsynonymous | 0 | 1 |
| SPOCD1    | chr1  | 32263851/G//C    | nonsynonymous | 0 | 1 |
| KIAA1522  | chr1  | 33236153/G//A    | nonsynonymous | 0 | 1 |
| STIL      | chr1  | 47755171/T//C    | nonsynonymous | 0 | 1 |
| LRRC7     | chr1  | 70486808/T//A    | nonsynonymous | 0 | 1 |
| FCRL6     | chr1  | 159778143/G//C   | nonsynonymous | 0 | 1 |
| WNT9A     | chr1  | 228109596/T//TG  | nonsynonymous | 0 | 1 |
| SCTR      | chr2  | 120236445/C//T   | synonymous    | 0 | 1 |
| LRP2      | chr2  | 170083030/T//C   | nonsynonymous | 0 | 1 |
| LRP2      | chr2  | 170163901/C//T   | nonsynonymous | 0 | 1 |
|           | chr2  | 223065774/G//A   | synonymous    | 0 | 1 |
| SETD5     | chr3  | 9475559/T//C     | synonymous    | 0 | 1 |
| FAM131A   | chr3  | 184059910/C//G   | nonsynonymous | 0 | 1 |
| LRBA      | chr4  | 151186893/T//C   | nonsynonymous | 0 | 1 |
| ZFR       | chr5  | 32388697/C//G    | nonsynonymous | 0 | 1 |
| CHD1      | chr5  | 98217047/G//A    | nonsynonymous | 0 | 1 |

|           |       |                   |               |   |   |
|-----------|-------|-------------------|---------------|---|---|
| ABLIM3    | chr5  | 148632379/T//C    | synonymous    | 0 | 1 |
| FABP6     | chr5  | 159656566/T//C    | nonsynonymous | 0 | 1 |
| N4BP3     | chr5  | 177548154/A//G    | nonsynonymous | 0 | 1 |
| GCNT2     | chr6  | 10529827/G//C     | nonsynonymous | 0 | 1 |
| VPS52     | chr6  | 33235094/G//C     | nonsynonymous | 0 | 1 |
| EPHA7     | chr6  | 93967896/T//C     | synonymous    | 0 | 1 |
| HACE1     | chr6  | 105243536/A//G    | nonsynonymous | 0 | 1 |
| COL22A1   | chr8  | 139845307/AT//A   | nonsynonymous | 0 | 1 |
| TMEM26    | chr10 | 63212742/T//C     | nonsynonymous | 0 | 1 |
| ZNF215    | chr11 | 6953397/G//C      | synonymous    | 0 | 1 |
| SCGB1D4   | chr11 | 62063818/T//C     | synonymous    | 0 | 1 |
| CCDC88B   | chr11 | 64111734/G//A     | nonsynonymous | 0 | 1 |
| ANO4      | chr12 | 101365177/C//T    | nonsynonymous | 0 | 1 |
| ITPK1     | chr14 | 93542947/A//G     | nonsynonymous | 0 | 1 |
| NUDT14    | chr14 | 105639561/A//G    | nonsynonymous | 0 | 1 |
| GABRG3    | chr15 | 27777755/C//G     | nonsynonymous | 0 | 1 |
| ALDH1A2   | chr15 | 58284974/C//G     | nonsynonymous | 0 | 1 |
| PTPN9     | chr15 | 75809668/C//CA    | nonsynonymous | 0 | 1 |
| EFL1      | chr15 | 82444165/G//C     | nonsynonymous | 0 | 1 |
| ADAMTS17  | chr15 | 100537659/C//T    | synonymous    | 0 | 1 |
| CCP110    | chr16 | 19559307/A//G     | synonymous    | 0 | 1 |
| ASPHD1    | chr16 | 29912996/C//A     | nonsynonymous | 0 | 1 |
| OSGIN1    | chr16 | 83994372/G//A     | synonymous    | 0 | 1 |
| SGSM2     | chr17 | 2264987/C//T      | nonsynonymous | 0 | 1 |
| PIRT      | chr17 | 10729022/G//C     | synonymous    | 0 | 1 |
| GAA       | chr17 | 78085814/A//T     | nonsynonymous | 0 | 1 |
| YES1      | chr18 | 745824/T//C       | nonsynonymous | 0 | 1 |
|           | chr18 | 3874693/G//A      | synonymous    | 0 | 1 |
| SETBP1    | chr18 | 42618502/C//T     | synonymous    | 0 | 1 |
| PTPRS     | chr19 | 5244233/C//T      | nonsynonymous | 0 | 1 |
| C19orf44  | chr19 | 16623834/T//C     | nonsynonymous | 0 | 1 |
| ZNF536    | chr19 | 31040162/A//G     | synonymous    | 0 | 1 |
| GSK3A     | chr19 | 42738778/A//G     | nonsynonymous | 0 | 1 |
| TRAPPC6A  | chr19 | 45666421/C//T     | synonymous    | 0 | 1 |
| ZNF667    | chr19 | 56953038/A//G     | synonymous    | 0 | 1 |
| TRIB3     | chr20 | 368679/C//T       | nonsynonymous | 0 | 1 |
| RALGAPA2  | chr20 | 20596774/A//G     | nonsynonymous | 0 | 1 |
|           | chr21 | 44323657/A//G     | synonymous    | 0 | 1 |
| PATZ1     | chr22 | 31740379/A//G     | nonsynonymous | 0 | 1 |
| SLC5A1    | chr22 | 32498215/G//A     | synonymous    | 0 | 1 |
| DMD       | chrX  | 32613949/A//G     | synonymous    | 0 | 1 |
| CFAP47    | chrX  | 36366284/G//C     | nonsynonymous | 0 | 1 |
| L1TD1     | chr1  | 62672694/A//T     | nonsynonymous | 0 | 1 |
| MFSD14A   | chr1  | 100533672/T//G    | nonsynonymous | 0 | 1 |
| SPAG17    | chr1  | 118596713/T//C    | nonsynonymous | 0 | 1 |
| KPRP      | chr1  | 152733512/C//T    | nonsynonymous | 0 | 1 |
| SPTA1     | chr1  | 158606546/T//C    | nonsynonymous | 0 | 1 |
| FSIP2     | chr2  | 186654153/G//C    | nonsynonymous | 0 | 1 |
| MRAS      | chr3  | 138121034/C//CAGA | nonsynonymous | 0 | 1 |
| ATR       | chr3  | 142185265/C//T    | nonsynonymous | 0 | 1 |
| RGS12     | chr4  | 3318133/A//C      | nonsynonymous | 0 | 1 |
| BEND4     | chr4  | 42119508/G//T     | synonymous    | 0 | 1 |
| TMPRSS11E | chr4  | 69343269/G//T     | nonsynonymous | 0 | 1 |
| WDFY3     | chr4  | 85696294/A//G     | synonymous    | 0 | 1 |
| NR3C2     | chr4  | 149356613/T//C    | nonsynonymous | 0 | 1 |
| DNAH5     | chr5  | 13792177/A//G     | nonsynonymous | 0 | 1 |
| MSH3      | chr5  | 80074660/G//T     | synonymous    | 0 | 1 |
| APC       | chr5  | 112163618/A//G    | synonymous    | 0 | 1 |
| TRPC7     | chr5  | 135567066/T//C    | nonsynonymous | 0 | 1 |
| PCDHA12   | chr5  | 140255189/C//T    | synonymous    | 0 | 1 |
| CD74      | chr5  | 149786486/C//T    | synonymous    | 0 | 1 |
|           | chr6  | 10557388/A//T     | synonymous    | 0 | 1 |
| PEX6      | chr6  | 42946000/AT//A    | synonymous    | 0 | 1 |
| B3GAT2    | chr6  | 71665652/T//G     | nonsynonymous | 0 | 1 |
| IBTK      | chr6  | 82925956/T//C     | nonsynonymous | 0 | 1 |
| GJA10     | chr6  | 90605007/T//C     | nonsynonymous | 0 | 1 |
| MUC17     | chr7  | 100676559/C//T    | nonsynonymous | 0 | 1 |
| MUC17     | chr7  | 100676569/C//T    | synonymous    | 0 | 1 |
| SHH       | chr7  | 155596171/A//G    | nonsynonymous | 0 | 1 |
| ANGPT2    | chr8  | 6420375/G//A      | synonymous    | 0 | 1 |

|           |       |                 |               |   |   |
|-----------|-------|-----------------|---------------|---|---|
| CSMD3     | chr8  | 113303878/T//G  | nonsynonymous | 0 | 1 |
| SMARCA2   | chr9  | 2191332/G//T    | nonsynonymous | 0 | 1 |
| PCSK5     | chr9  | 78973573/C//A   | nonsynonymous | 0 | 1 |
| VPS13A    | chr9  | 79932549/C//T   | nonsynonymous | 0 | 1 |
| JMJD1C    | chr10 | 64977092/C//A   | nonsynonymous | 0 | 1 |
| WNT8B     | chr10 | 102240768/A//G  | synonymous    | 0 | 1 |
| VAX1      | chr10 | 118896088/G//A  | synonymous    | 0 | 1 |
| DMBT1     | chr10 | 124344787/A//T  | nonsynonymous | 0 | 1 |
| MUC6      | chr11 | 1029360/G//T    | nonsynonymous | 0 | 1 |
| MUC15     | chr11 | 26581396/C//T   | synonymous    | 0 | 1 |
| FBXO3     | chr11 | 33777497/A//G   | synonymous    | 0 | 1 |
| OR5AS1    | chr11 | 55798636/G//T   | nonsynonymous | 0 | 1 |
| RIN1      | chr11 | 66103805/C//T   | synonymous    | 0 | 1 |
| RSF1      | chr11 | 77409696/G//C   | nonsynonymous | 0 | 1 |
| IGSF9B    | chr11 | 133790800/G//A  | synonymous    | 0 | 1 |
| PRMT8     | chr12 | 3659109/T//C    | nonsynonymous | 0 | 1 |
| BICD1     | chr12 | 32480722/G//A   | nonsynonymous | 0 | 1 |
| ADCY6     | chr12 | 49176786/G//A   | synonymous    | 0 | 1 |
| FIGNL2    | chr12 | 52216076/C//G   | nonsynonymous | 0 | 1 |
| GLI1      | chr12 | 57864645/G//C   | nonsynonymous | 0 | 1 |
| PPM1H     | chr12 | 63061003/G//A   | nonsynonymous | 0 | 1 |
| CPM       | chr12 | 69260751/G//A   | nonsynonymous | 0 | 1 |
| ACSS3     | chr12 | 81503383/G//A   | nonsynonymous | 0 | 1 |
| CEP83     | chr12 | 94706755/T//G   | nonsynonymous | 0 | 1 |
| TRMT5     | chr14 | 61445948/C//T   | nonsynonymous | 0 | 1 |
| MLH3      | chr14 | 75513492/T//C   | nonsynonymous | 0 | 1 |
| ISM2      | chr14 | 77948673/A//G   | nonsynonymous | 0 | 1 |
| UNC45A    | chr15 | 91489959/A//G   | nonsynonymous | 0 | 1 |
| CHST5     | chr16 | 75563186/C//T   | nonsynonymous | 0 | 1 |
| KRT27     | chr17 | 38936050/C//T   | nonsynonymous | 0 | 1 |
| CDC27     | chr17 | 45229240/T//C   | synonymous    | 0 | 1 |
| ZNF878    | chr19 | 12155742/A//G   | synonymous    | 0 | 1 |
| ZNF98     | chr19 | 22574480/C//T   | synonymous    | 0 | 1 |
| FAM83E    | chr19 | 49113191/T//C   | nonsynonymous | 0 | 1 |
| C20orf144 | chr20 | 32250263/C//T   | nonsynonymous | 0 | 1 |
| FTCD      | chr21 | 47571833/G//A   | synonymous    | 0 | 1 |
| EIF2S3    | chrX  | 24078283/A//T   | synonymous    | 0 | 1 |
| IGBP1     | chrX  | 69385835/T//G   | synonymous    | 0 | 1 |
| MAGEC2    | chrX  | 141291549/C//A  | synonymous    | 0 | 1 |
| CETN2     | chrX  | 151996389/T//C  | nonsynonymous | 0 | 1 |
| EIF4G3    | chr1  | 21151697/A//G   | synonymous    | 1 | 0 |
| NCF2      | chr1  | 183525366/C//T  | nonsynonymous | 1 | 0 |
| OBSCN     | chr1  | 228558877/C//T  | nonsynonymous | 1 | 0 |
| TBCE      | chr1  | 235590465/G//T  | nonsynonymous | 1 | 0 |
| MSH6      | chr2  | 48032088/G//A   | nonsynonymous | 1 | 0 |
| ABCA12    | chr2  | 215868978/C//T  | nonsynonymous | 1 | 0 |
| PRR21     | chr2  | 240981417/G//A  | nonsynonymous | 1 | 0 |
| TBL1XR1   | chr3  | 176744171/G//A  | nonsynonymous | 1 | 0 |
| SLC26A1   | chr4  | 985137/G//A     | nonsynonymous | 1 | 0 |
| CMYA5     | chr5  | 79026966/C//T   | nonsynonymous | 1 | 0 |
| PCDHA4    | chr5  | 140188217/C//T  | nonsynonymous | 1 | 0 |
| PCDHA5    | chr5  | 140203211/G//A  | synonymous    | 1 | 0 |
| PCDHGB4   | chr5  | 140769248/C//T  | synonymous    | 1 | 0 |
| GLTSCR1L  | chr6  | 42821414/G//A   | nonsynonymous | 1 | 0 |
| CEP162    | chr6  | 84865156/G//A   | nonsynonymous | 1 | 0 |
| ARID1B    | chr6  | 157511296/A//G  | nonsynonymous | 1 | 0 |
| SYNJ2     | chr6  | 158402913/G//A  | synonymous    | 1 | 0 |
| INHBA     | chr7  | 41729399/C//T   | nonsynonymous | 1 | 0 |
| NUPR2     | chr7  | 56184055/G//A   | synonymous    | 1 | 0 |
| ADAM22    | chr7  | 87762230/G//C   | synonymous    | 1 | 0 |
| SLC13A4   | chr7  | 135412196/C//T  | nonsynonymous | 1 | 0 |
| ZNF395    | chr8  | 28210108/A//G   | nonsynonymous | 1 | 0 |
| NBN       | chr8  | 90967786/G//C   | synonymous    | 1 | 0 |
| RNF139    | chr8  | 125498606/G//A  | nonsynonymous | 1 | 0 |
| EPPK1     | chr8  | 144946427/A//G  | nonsynonymous | 1 | 0 |
| ERP44     | chr9  | 102861120/C//CA | nonsynonymous | 1 | 0 |
| PTPN3     | chr9  | 112145834/G//C  | synonymous    | 1 | 0 |
| ARL3      | chr10 | 104436591/T//C  | synonymous    | 1 | 0 |
| NLRP10    | chr11 | 7981533/C//T    | synonymous    | 1 | 0 |
| ZBTB44    | chr11 | 130131055/T//G  | synonymous    | 1 | 0 |

|               |       |                 |               |   |   |
|---------------|-------|-----------------|---------------|---|---|
| CD163         | chr12 | 7637769/G//A    | nonsynonymous | 1 | 0 |
| AQP6          | chr12 | 50367139/C//T   | synonymous    | 1 | 0 |
| GRK1          | chr13 | 114435967/G//A  | synonymous    | 1 | 0 |
| ESRRB         | chr14 | 76964674/T//A   | nonsynonymous | 1 | 0 |
| FES           | chr15 | 91434222/C//T   | nonsynonymous | 1 | 0 |
| IFT140        | chr16 | 1652566/G//A    | synonymous    | 1 | 0 |
| USP7          | chr16 | 8988907/A//C    | nonsynonymous | 1 | 0 |
| TMC5          | chr16 | 19483450/C//T   | nonsynonymous | 1 | 0 |
| VAT1L         | chr16 | 77850877/C//G   | nonsynonymous | 1 | 0 |
| TP53          | chr17 | 7577097/C//A    | nonsynonymous | 1 | 0 |
| WIPF2         | chr17 | 38416927/C//T   | synonymous    | 1 | 0 |
| BAHCC1        | chr17 | 79425853/C//T   | synonymous    | 1 | 0 |
| PRTN3         | chr19 | 846342/ACTTT//A | nonsynonymous | 1 | 0 |
| MUC16         | chr19 | 9002493/T//C    | synonymous    | 1 | 0 |
| MUC16         | chr19 | 9064376/C//T    | synonymous    | 1 | 0 |
| ZNF559-ZNF177 | chr19 | 9490741/A//G    | nonsynonymous | 1 | 0 |
| BEST2         | chr19 | 12865463/C//T   | synonymous    | 1 | 0 |
| CD22          | chr19 | 35823532/C//T   | synonymous    | 1 | 0 |
| RASGRP4       | chr19 | 38905649/C//A   | nonsynonymous | 1 | 0 |
| EML2-AS1      | chr19 | 46145261/G//A   | synonymous    | 1 | 0 |
| SPHK2         | chr19 | 49132587/G//C   | nonsynonymous | 1 | 0 |
| PHACTR3       | chr20 | 58330412/C//T   | synonymous    | 1 | 0 |
| CACNG2        | chr22 | 36960675/C//T   | nonsynonymous | 1 | 0 |
| FGD1          | chrX  | 54495224/T//A   | nonsynonymous | 1 | 0 |
| PGK1          | chrX  | 77380388/T//C   | synonymous    | 1 | 0 |
| TENM1         | chrX  | 123787547/G//A  | nonsynonymous | 1 | 0 |
| MAGEC3        | chrX  | 140983157/G//T  | nonsynonymous | 1 | 0 |
| CNGA2         | chrX  | 150911942/G//C  | nonsynonymous | 1 | 0 |
| CLCN6         | chr1  | 11894611/C//T   | nonsynonymous | 0 | 1 |
| ST6GALNAC5    | chr1  | 77510290/C//A   | synonymous    | 0 | 1 |
| MCOLN2        | chr1  | 85405351/C//T   | nonsynonymous | 0 | 1 |
| COL11A1       | chr1  | 103483396/G//A  | nonsynonymous | 0 | 1 |
| PROK1         | chr1  | 110996598/G//A  | nonsynonymous | 0 | 1 |
| CCDC185       | chr1  | 223566940/C//T  | synonymous    | 0 | 1 |
| OBSCN         | chr1  | 228465546/G//C  | nonsynonymous | 0 | 1 |
| CNGA3         | chr2  | 99013440/C//T   | nonsynonymous | 0 | 1 |
| UBXN4         | chr2  | 136540312/G//A  | synonymous    | 0 | 1 |
| INPP5D        | chr2  | 233986934/G//A  | nonsynonymous | 0 | 1 |
| HSPBAP1       | chr3  | 122487662/A//G  | synonymous    | 0 | 1 |
| YEATS2        | chr3  | 183436371/A//G  | synonymous    | 0 | 1 |
| IRX1          | chr5  | 3601238/T//C    | synonymous    | 0 | 1 |
| DNAH5         | chr5  | 13777433/G//T   | nonsynonymous | 0 | 1 |
| CLPSL1        | chr6  | 35754859/G//A   | nonsynonymous | 0 | 1 |
| TDRD6         | chr6  | 46656075/C//T   | synonymous    | 0 | 1 |
| BCKDHB        | chr6  | 80881069/G//T   | nonsynonymous | 0 | 1 |
| OSTM1         | chr6  | 108370594/C//T  | nonsynonymous | 0 | 1 |
| LAMA4         | chr6  | 112476836/A//G  | synonymous    | 0 | 1 |
| LAMA2         | chr6  | 129794482/C//T  | nonsynonymous | 0 | 1 |
| MYCT1         | chr6  | 153019200/A//C  | nonsynonymous | 0 | 1 |
| GRB10         | chr7  | 50660647/G//A   | synonymous    | 0 | 1 |
| TBL2          | chr7  | 72992843/A//G   | nonsynonymous | 0 | 1 |
| NUP205        | chr7  | 135282890/C//T  | nonsynonymous | 0 | 1 |
| ABCA2         | chr9  | 139903855/C//T  | nonsynonymous | 0 | 1 |
| MAP3K8        | chr10 | 30747086/C//T   | nonsynonymous | 0 | 1 |
| SLC35G1       | chr10 | 95660897/G//A   | nonsynonymous | 0 | 1 |
| MFRP          | chr11 | 119215585/G//A  | synonymous    | 0 | 1 |
| CCDC184       | chr12 | 48578223/C//T   | synonymous    | 0 | 1 |
| MBD6          | chr12 | 57922052/C//T   | synonymous    | 0 | 1 |
| VPS29         | chr12 | 110930973/C//T  | nonsynonymous | 0 | 1 |
| FZD10         | chr12 | 130648864/C//T  | synonymous    | 0 | 1 |
| SACS          | chr13 | 23911813/T//A   | nonsynonymous | 0 | 1 |
| PDS5B         | chr13 | 33349272/A//G   | synonymous    | 0 | 1 |
| PCDH9         | chr13 | 67802580/T//C   | synonymous    | 0 | 1 |
| NPAS3         | chr14 | 34266717/G//A   | synonymous    | 0 | 1 |
| DDHD1         | chr14 | 53619018/C//T   | nonsynonymous | 0 | 1 |
| HIF1A         | chr14 | 62212491/A//G   | nonsynonymous | 0 | 1 |
| RYR3          | chr15 | 34137131/G//A   | synonymous    | 0 | 1 |
| POLG          | chr15 | 89862280/C//T   | nonsynonymous | 0 | 1 |
| BLM           | chr15 | 91326140/A//G   | nonsynonymous | 0 | 1 |
| ZNF500        | chr16 | 4815622/C//T    | nonsynonymous | 0 | 1 |

|          |       |                     |               |   |   |
|----------|-------|---------------------|---------------|---|---|
| DNAJA2   | chr16 | 47005385/C//T       | nonsynonymous | 0 | 1 |
| PIEZO1   | chr16 | 88793442/C//A       | synonymous    | 0 | 1 |
| KRT25    | chr17 | 38906816/C//T       | nonsynonymous | 0 | 1 |
| ARHGAP27 | chr17 | 43473166/G//A       | synonymous    | 0 | 1 |
| GATA6    | chr18 | 19752098/C//T       | synonymous    | 0 | 1 |
| PLIN5    | chr19 | 4523889/C//T        | nonsynonymous | 0 | 1 |
| ZNRF4    | chr19 | 5455644/T//C        | nonsynonymous | 0 | 1 |
| ZNF667   | chr19 | 56952783/A//G       | synonymous    | 0 | 1 |
| ZNF835   | chr19 | 57175897/A//T       | nonsynonymous | 0 | 1 |
| AURKC    | chr19 | 57746684/C//A       | nonsynonymous | 0 | 1 |
| ZMYND8   | chr20 | 45874842/C//T       | nonsynonymous | 0 | 1 |
| TPTE     | chr21 | 10906990/C//T       | nonsynonymous | 0 | 1 |
| MPPED1   | chr22 | 43831052/C//T       | nonsynonymous | 0 | 1 |
| ADGRG2   | chrX  | 19024222/A//G       | synonymous    | 0 | 1 |
| PRAMEF11 | chr1  | 12885005/C//T       | nonsynonymous | 0 | 1 |
| ADAR     | chr1  | 154558767/A//C      | nonsynonymous | 0 | 1 |
| YY1AP1   | chr1  | 155657923/G//A      | synonymous    | 0 | 1 |
| LMNA     | chr1  | 156084829/T//C      | synonymous    | 0 | 1 |
| DNM3     | chr1  | 172062020/G//T      | synonymous    | 0 | 1 |
| ST6GAL2  | chr2  | 107450547/T//G      | nonsynonymous | 0 | 1 |
| CELSR3   | chr3  | 48699529/T//C       | nonsynonymous | 0 | 1 |
| VGLL3    | chr3  | 86996104/A//C       | synonymous    | 0 | 1 |
|          | chr3  | 184971669/A//G      | synonymous    | 0 | 1 |
| GRXCR1   | chr4  | 42964937/G//A       | nonsynonymous | 0 | 1 |
| BASP1    | chr5  | 17275433/C//T       | synonymous    | 0 | 1 |
| PARP8    | chr5  | 50055515/G//A       | nonsynonymous | 0 | 1 |
| TMEM232  | chr5  | 109961044/T//C      | nonsynonymous | 0 | 1 |
| MUC22    | chr6  | 30994181/T//A       | nonsynonymous | 0 | 1 |
| TAP2     | chr6  | 32802958/C//T       | synonymous    | 0 | 1 |
| ICK      | chr6  | 52878460/C//T       | synonymous    | 0 | 1 |
| SEC63    | chr6  | 108204310/T//G      | nonsynonymous | 0 | 1 |
| HDAC9    | chr7  | 18684313/G//A       | nonsynonymous | 0 | 1 |
| HGF      | chr7  | 81399273/T//C       | synonymous    | 0 | 1 |
| SLC24A2  | chr9  | 19786519/C//A       | nonsynonymous | 0 | 1 |
| AFAP1L2  | chr10 | 116083010/C//T      | nonsynonymous | 0 | 1 |
| DSCAML1  | chr11 | 117303079/C//T      | nonsynonymous | 0 | 1 |
| GRASP    | chr12 | 52408482/G//T       | synonymous    | 0 | 1 |
| TBK1     | chr12 | 64860826/G//A       | synonymous    | 0 | 1 |
| STYX     | chr14 | 53226442/T//G       | nonsynonymous | 0 | 1 |
| TLE6     | chr19 | 2987752/G//A        | nonsynonymous | 0 | 1 |
| ZNF98    | chr19 | 22574648/T//C       | synonymous    | 0 | 1 |
| ZNF645   | chrX  | 22292056/A//C       | synonymous    | 0 | 1 |
| CCDC120  | chrX  | 48925238/G//A       | nonsynonymous | 0 | 1 |
| CXorf57  | chrX  | 105876162/G//T      | nonsynonymous | 0 | 1 |
| H6PD     | chr1  | 9323631/A//G        | nonsynonymous | 0 | 1 |
| TAS1R2   | chr1  | 19180787/A//G       | nonsynonymous | 0 | 1 |
| KIF17    | chr1  | 21014345/A//G       | nonsynonymous | 0 | 1 |
| USP48    | chr1  | 22074644/A//G       | nonsynonymous | 0 | 1 |
| ATF6     | chr1  | 161789538/T//C      | nonsynonymous | 0 | 1 |
| ZEB2     | chr2  | 145147559/G//A      | nonsynonymous | 0 | 1 |
| GALNT13  | chr2  | 155158098/C//CCCAGG | nonsynonymous | 0 | 1 |
| SCN1A    | chr2  | 166929960/C//T      | nonsynonymous | 0 | 1 |
| COPS8    | chr2  | 238006426/A//G      | synonymous    | 0 | 1 |
| RAF1     | chr3  | 12645688/G//A       | nonsynonymous | 0 | 1 |
| GALNT15  | chr3  | 16254202/G//C       | nonsynonymous | 0 | 1 |
| CCDC66   | chr3  | 56655658/C//G       | synonymous    | 0 | 1 |
| PLXNA1   | chr3  | 126707515/G//A      | nonsynonymous | 0 | 1 |
| MELTF    | chr3  | 196744076/G//A      | synonymous    | 0 | 1 |
| KIAA1211 | chr4  | 57180504/C//T       | nonsynonymous | 0 | 1 |
| NKAPL    | chr6  | 28227744/A//G       | nonsynonymous | 0 | 1 |
| FAM26E   | chr6  | 116833227/C//A      | nonsynonymous | 0 | 1 |
| AGBL3    | chr7  | 134719261/C//A      | nonsynonymous | 0 | 1 |
| MGAM     | chr7  | 141736007/T//C      | synonymous    | 0 | 1 |
| FAM167A  | chr8  | 11302004/C//T       | synonymous    | 0 | 1 |
| ADAM2    | chr8  | 39694694/C//A       | nonsynonymous | 0 | 1 |
| RBM12B   | chr8  | 94746810/T//C       | nonsynonymous | 0 | 1 |
| GNE      | chr9  | 36249369/T//C       | synonymous    | 0 | 1 |
| ZNF618   | chr9  | 116769651/A//G      | nonsynonymous | 0 | 1 |
| DHTKD1   | chr10 | 12148351/T//C       | nonsynonymous | 0 | 1 |
| EXT2     | chr11 | 44255775/G//A       | synonymous    | 0 | 1 |

|            |       |                |               |   |   |
|------------|-------|----------------|---------------|---|---|
| SYVN1      | chr11 | 64899815/C//T  | nonsynonymous | 0 | 1 |
| PRDM10     | chr11 | 129784891/C//T | nonsynonymous | 0 | 1 |
| NCAPD3     | chr11 | 134023249/C//T | nonsynonymous | 0 | 1 |
| KLHL42     | chr12 | 27951087/A//G  | synonymous    | 0 | 1 |
| NAV3       | chr12 | 78511807/C//T  | synonymous    | 0 | 1 |
| MYF5       | chr12 | 81110767/C//T  | synonymous    | 0 | 1 |
| MMP17      | chr12 | 132334601/G//A | nonsynonymous | 0 | 1 |
| EP400      | chr12 | 132514302/G//A | nonsynonymous | 0 | 1 |
| SLC10A2    | chr13 | 103718363/C//T | nonsynonymous | 0 | 1 |
| SMOC1      | chr14 | 70478273/G//A  | nonsynonymous | 0 | 1 |
| DYNC1H1    | chr14 | 102504831/T//C | nonsynonymous | 0 | 1 |
| ZNF423     | chr16 | 49671973/C//T  | nonsynonymous | 0 | 1 |
| SALL1      | chr16 | 51174084/A//G  | synonymous    | 0 | 1 |
| ADAMTS18   | chr16 | 77369685/G//C  | synonymous    | 0 | 1 |
| KIAA0513   | chr16 | 85112552/A//G  | nonsynonymous | 0 | 1 |
| CD300LG    | chr17 | 41931398/C//A  | synonymous    | 0 | 1 |
| CDC27      | chr17 | 45234709/A//G  | synonymous    | 0 | 1 |
| SERPIN2    | chr18 | 61570438/C//A  | nonsynonymous | 0 | 1 |
| CDH19      | chr18 | 64178923/C//G  | nonsynonymous | 0 | 1 |
| ZNF709     | chr19 | 12575005/C//T  | nonsynonymous | 0 | 1 |
| ZNF709     | chr19 | 12575020/A//G  | synonymous    | 0 | 1 |
| LILRA1     | chr19 | 55107378/C//T  | synonymous    | 0 | 1 |
| NECAB3     | chr20 | 32260202/A//G  | nonsynonymous | 0 | 1 |
| EYA2       | chr20 | 45718026/C//A  | synonymous    | 0 | 1 |
| KRTAP10-11 | chr21 | 46066659/G//A  | nonsynonymous | 0 | 1 |
| TTLL12     | chr22 | 43575656/C//T  | nonsynonymous | 0 | 1 |
| LONRF3     | chrX  | 118109075/T//C | nonsynonymous | 0 | 1 |
| SPANXN1    | chrX  | 144329162/C//T | nonsynonymous | 0 | 1 |
| HOOK1      | chr1  | 60338669/C//A  | synonymous    | 0 | 1 |
| ASB17      | chr1  | 76384632/G//A  | synonymous    | 0 | 1 |
| RPAP2      | chr1  | 92799008/G//A  | nonsynonymous | 0 | 1 |
| IFI16      | chr1  | 158988272/A//G | nonsynonymous | 0 | 1 |
| OBSCN      | chr1  | 228444454/C//T | nonsynonymous | 0 | 1 |
| CCT7       | chr2  | 73470142/G//A  | nonsynonymous | 0 | 1 |
| SLC4A7     | chr3  | 27439173/A//G  | nonsynonymous | 0 | 1 |
| SLC4A7     | chr3  | 27439198/G//A  | nonsynonymous | 0 | 1 |
| MUC4       | chr3  | 195512287/G//A | nonsynonymous | 0 | 1 |
| GAK        | chr4  | 875835/C//T    | synonymous    | 0 | 1 |
| PRDM5      | chr4  | 121828693/A//G | nonsynonymous | 0 | 1 |
| SDHA       | chr5  | 226082/G//C    | nonsynonymous | 0 | 1 |
| ICE1       | chr5  | 5460898/C//G   | nonsynonymous | 0 | 1 |
| WDR36      | chr5  | 110446009/A//T | synonymous    | 0 | 1 |
| PKD2L2     | chr5  | 137228217/T//C | nonsynonymous | 0 | 1 |
| SLC22A7    | chr6  | 43267462/A//G  | nonsynonymous | 0 | 1 |
| SLC22A7    | chr6  | 43271939/C//A  | nonsynonymous | 0 | 1 |
| SAMD3      | chr6  | 130535536/G//A | nonsynonymous | 0 | 1 |
| LPA        | chr6  | 160961159/A//G | nonsynonymous | 0 | 1 |
| ZC3HAV1    | chr7  | 138768750/C//T | nonsynonymous | 0 | 1 |
| LOXL2      | chr8  | 23155621/C//T  | nonsynonymous | 0 | 1 |
| WISP1      | chr8  | 134239766/A//G | nonsynonymous | 0 | 1 |
| MBL2       | chr10 | 54531407/T//G  | synonymous    | 0 | 1 |
| ADAMTS14   | chr10 | 72492020/C//T  | synonymous    | 0 | 1 |
| HPS1       | chr10 | 100185390/G//C | nonsynonymous | 0 | 1 |
| OAF        | chr11 | 120099816/C//T | synonymous    | 0 | 1 |
| ITPR2      | chr12 | 26580958/A//G  | nonsynonymous | 0 | 1 |
| ANO6       | chr12 | 45742085/C//A  | nonsynonymous | 0 | 1 |
| PRPH       | chr12 | 49691261/C//T  | nonsynonymous | 0 | 1 |
| CLIP1      | chr12 | 122773095/A//C | synonymous    | 0 | 1 |
| CENPJ      | chr13 | 25487125/C//T  | synonymous    | 0 | 1 |
| KBTBD7     | chr13 | 41766649/C//T  | nonsynonymous | 0 | 1 |
| ADCY4      | chr14 | 24798353/G//A  | nonsynonymous | 0 | 1 |
| TTC7B      | chr14 | 91044455/G//A  | nonsynonymous | 0 | 1 |
| NHLRC4     | chr16 | 618123/G//A    | nonsynonymous | 0 | 1 |
| ADCY7      | chr16 | 50338418/G//A  | nonsynonymous | 0 | 1 |
| WRAP53     | chr17 | 7604781/G//T   | nonsynonymous | 0 | 1 |
| ARHGAP44   | chr17 | 12799726/G//T  | synonymous    | 0 | 1 |
| MUC16      | chr19 | 9002576/T//C   | nonsynonymous | 0 | 1 |
| MUC16      | chr19 | 9002587/C//T   | nonsynonymous | 0 | 1 |
| MUC16      | chr19 | 9002597/C//T   | nonsynonymous | 0 | 1 |
| CLASRP     | chr19 | 45570617/C//T  | nonsynonymous | 0 | 1 |

|          |       |                 |               |   |   |
|----------|-------|-----------------|---------------|---|---|
| LILRA4   | chr19 | 54849846/C//T   | nonsynonymous | 0 | 1 |
| KIR3DL1  | chr19 | 55330036/G//A   | nonsynonymous | 0 | 1 |
| MCM8     | chr20 | 5953761/C//T    | synonymous    | 0 | 1 |
| LRR3     | chr21 | 45877153/T//C   | nonsynonymous | 0 | 1 |
| NCF4     | chr22 | 37267747/C//A   | nonsynonymous | 0 | 1 |
| CELSR1   | chr22 | 46931025/A//G   | synonymous    | 0 | 1 |
| PJA1     | chrX  | 68381401/C//T   | nonsynonymous | 0 | 1 |
| DRP2     | chrX  | 100496661/C//G  | synonymous    | 0 | 1 |
| LMNA     | chr1  | 156107521/T//A  | nonsynonymous | 0 | 1 |
| F5       | chr1  | 169510376/G//C  | nonsynonymous | 0 | 1 |
| F5       | chr1  | 169510379/C//T  | nonsynonymous | 0 | 1 |
| RC3H1    | chr1  | 173931175/A//G  | synonymous    | 0 | 1 |
| GPR45    | chr2  | 105858707/A//G  | nonsynonymous | 0 | 1 |
| MYO7B    | chr2  | 128393453/C//T  | nonsynonymous | 0 | 1 |
| MARCH4   | chr2  | 217234857/G//A  | nonsynonymous | 0 | 1 |
| PRKCI    | chr3  | 169977774/T//C  | nonsynonymous | 0 | 1 |
| TPRG1    | chr3  | 188956657/C//A  | synonymous    | 0 | 1 |
| LRR3-14B | chr5  | 195416/C//G     | nonsynonymous | 0 | 1 |
| WDR70    | chr5  | 37438084/G//T   | nonsynonymous | 0 | 1 |
| APC      | chr5  | 112175709/AT//A | nonsynonymous | 0 | 1 |
| RAD50    | chr5  | 131939715/A//G  | nonsynonymous | 0 | 1 |
| KHDC1    | chr6  | 73951235/G//A   | synonymous    | 0 | 1 |
| TAF6     | chr7  | 99709804/A//G   | nonsynonymous | 0 | 1 |
| KCNMA1   | chr10 | 78669784/C//T   | synonymous    | 0 | 1 |
| PHLDB1   | chr11 | 118498087/GT//G | nonsynonymous | 0 | 1 |
| BAZ1A    | chr14 | 35264914/T//C   | nonsynonymous | 0 | 1 |
| AVEN     | chr15 | 34163232/CTA//C | nonsynonymous | 0 | 1 |
| ABCC6    | chr16 | 16315537/AG//A  | nonsynonymous | 0 | 1 |
| PSMD11   | chr17 | 30771580/GTC//G | nonsynonymous | 0 | 1 |
| CCL5     | chr17 | 34207330/T//C   | synonymous    | 0 | 1 |
| PDE4C    | chr19 | 18331984/A//G   | nonsynonymous | 0 | 1 |
| WDR87    | chr19 | 38376445/T//C   | synonymous    | 0 | 1 |
| POTED    | chr21 | 14982621/G//C   | nonsynonymous | 0 | 1 |
| DYRK1A   | chr21 | 38884639/C//T   | synonymous    | 0 | 1 |
| COMT     | chr22 | 19956272/C//G   | synonymous    | 0 | 1 |
| STAG2    | chrX  | 123179101/C//T  | nonsynonymous | 0 | 1 |
| CHD5     | chr1  | 6212507/C//T    | nonsynonymous | 1 | 0 |
| H6PD     | chr1  | 9324725/C//A    | nonsynonymous | 1 | 0 |
| MFAP2    | chr1  | 17301829/C//T   | nonsynonymous | 1 | 0 |
| PTAFR    | chr1  | 28476568/G//A   | nonsynonymous | 1 | 0 |
| MANEAL   | chr1  | 38265374/G//A   | synonymous    | 1 | 0 |
| SCP2     | chr1  | 53504615/C//T   | synonymous    | 1 | 0 |
| LEPR     | chr1  | 66036390/G//A   | nonsynonymous | 1 | 0 |
| OTUD7B   | chr1  | 149916153/C//T  | nonsynonymous | 1 | 0 |
| FLG2     | chr1  | 152327673/T//A  | synonymous    | 1 | 0 |
| SHE      | chr1  | 154461721/C//T  | nonsynonymous | 1 | 0 |
| RC3H1    | chr1  | 173930299/C//T  | nonsynonymous | 1 | 0 |
| AGBL5    | chr2  | 27278796/C//T   | synonymous    | 1 | 0 |
| STRN     | chr2  | 37111134/G//A   | nonsynonymous | 1 | 0 |
| TTN      | chr2  | 179476813/A//C  | synonymous    | 1 | 0 |
| COL5A2   | chr2  | 189898826/G//A  | synonymous    | 1 | 0 |
| OBSL1    | chr2  | 220423977/C//T  | nonsynonymous | 1 | 0 |
| TMPPE    | chr3  | 33134833/G//A   | synonymous    | 1 | 0 |
| CELSR3   | chr3  | 48697673/G//A   | nonsynonymous | 1 | 0 |
| STAB1    | chr3  | 52557672/C//T   | nonsynonymous | 1 | 0 |
| ERC2     | chr3  | 55922488/G//A   | synonymous    | 1 | 0 |
| ATR      | chr3  | 142177876/C//T  | nonsynonymous | 1 | 0 |
| EVC2     | chr4  | 5576419/C//G    | nonsynonymous | 1 | 0 |
| TBC1D14  | chr4  | 6925581/C//T    | synonymous    | 1 | 0 |
| C4orf22  | chr4  | 81884889/G//T   | synonymous    | 1 | 0 |
| UNC5C    | chr4  | 96199454/C//A   | nonsynonymous | 1 | 0 |
| USP53    | chr4  | 120189443/C//T  | nonsynonymous | 1 | 0 |
| KLHL2    | chr4  | 166129016/G//A  | synonymous    | 1 | 0 |
| DNAH5    | chr5  | 13735348/G//A   | nonsynonymous | 1 | 0 |
| TRIO     | chr5  | 14369586/C//T   | nonsynonymous | 1 | 0 |
| CD180    | chr5  | 66481798/T//C   | synonymous    | 1 | 0 |
| RASA1    | chr5  | 86685331/G//A   | nonsynonymous | 1 | 0 |
| JADE2    | chr5  | 133873748/G//A  | nonsynonymous | 1 | 0 |
| PCDHGA9  | chr5  | 140783737/G//A  | synonymous    | 1 | 0 |
| GABRA1   | chr5  | 161302638/A//T  | nonsynonymous | 1 | 0 |

|          |       |                   |               |   |   |
|----------|-------|-------------------|---------------|---|---|
| PSMB9    | chr6  | 32823941/C//T     | synonymous    | 1 | 0 |
| GRIK2    | chr6  | 101847196/C//T    | nonsynonymous | 1 | 0 |
| ABCB5    | chr7  | 20689758/G//A     | synonymous    | 1 | 0 |
| CCDC129  | chr7  | 31594123/G//T     | synonymous    | 1 | 0 |
| GLI3     | chr7  | 42005049/C//T     | nonsynonymous | 1 | 0 |
| NACAD    | chr7  | 45124497/C//T     | nonsynonymous | 1 | 0 |
| BAZ1B    | chr7  | 72858318/T//G     | nonsynonymous | 1 | 0 |
| PRSS3P2  | chr7  | 142479915/T//C    | synonymous    | 1 | 0 |
| ZNF862   | chr7  | 149559068/G//A    | nonsynonymous | 1 | 0 |
| ZNF705G  | chr8  | 7215769/T//C      | nonsynonymous | 1 | 0 |
| NCOA2    | chr8  | 71025784/A//G     | synonymous    | 1 | 0 |
| KLHL38   | chr8  | 124664458/C//T    | nonsynonymous | 1 | 0 |
| ANKRD18A | chr9  | 38596183/G//C     | nonsynonymous | 1 | 0 |
| C9orf135 | chr9  | 72471585/G//A     | nonsynonymous | 1 | 0 |
| GOLGA2   | chr9  | 131021523/C//T    | nonsynonymous | 1 | 0 |
| FUBP3    | chr9  | 133499103/G//T    | synonymous    | 1 | 0 |
| PITRM1   | chr10 | 3181098/T//G      | nonsynonymous | 1 | 0 |
| WDFY4    | chr10 | 49986708/C//A     | nonsynonymous | 1 | 0 |
| C10orf53 | chr10 | 50902599/T//C     | nonsynonymous | 1 | 0 |
| SGPL1    | chr10 | 72633346/A//C     | nonsynonymous | 1 | 0 |
| COX15    | chr10 | 101487284/A//G    | synonymous    | 1 | 0 |
| C10orf76 | chr10 | 103607202/C//A    | synonymous    | 1 | 0 |
| AFAP1L2  | chr10 | 116060437/C//T    | nonsynonymous | 1 | 0 |
| FAM204A  | chr10 | 120095930/T//C    | synonymous    | 1 | 0 |
| DOCK1    | chr10 | 129249705/T//C    | synonymous    | 1 | 0 |
| CNGA4    | chr11 | 6261451/C//T      | nonsynonymous | 1 | 0 |
| C11orf49 | chr11 | 47179457/A//G     | synonymous    | 1 | 0 |
|          | chr11 | 85623734/T//C     | synonymous    | 1 | 0 |
| FAT3     | chr11 | 92086555/C//T     | nonsynonymous | 1 | 0 |
| FOXRED1  | chr11 | 126143248/C//T    | synonymous    | 1 | 0 |
| B4GALNT3 | chr12 | 645417/AG//A      | nonsynonymous | 1 | 0 |
| KIF21A   | chr12 | 39763833/G//GC    | synonymous    | 1 | 0 |
| METTL25  | chr12 | 82793062/TAAAG//T | nonsynonymous | 1 | 0 |
| ACTR6    | chr12 | 100613796/G//A    | synonymous    | 1 | 0 |
| FNDC3A   | chr13 | 49741419/A//G     | synonymous    | 1 | 0 |
| PCDH8    | chr13 | 53418998/G//A     | synonymous    | 1 | 0 |
| NALCN    | chr13 | 101714451/C//T    | nonsynonymous | 1 | 0 |
| CCDC168  | chr13 | 103397221/A//G    | synonymous    | 1 | 0 |
| TNFSF13B | chr13 | 108959287/C//T    | synonymous    | 1 | 0 |
| FAM161B  | chr14 | 74411118/T//G     | nonsynonymous | 1 | 0 |
| CHGA     | chr14 | 93397608/G//T     | nonsynonymous | 1 | 0 |
| AQR      | chr15 | 35202498/C//T     | nonsynonymous | 1 | 0 |
| SPTBN5   | chr15 | 42174905/C//T     | nonsynonymous | 1 | 0 |
| ATP8B4   | chr15 | 50264849/G//A     | synonymous    | 1 | 0 |
| DNAH3    | chr16 | 20976493/G//A     | nonsynonymous | 1 | 0 |
| SETD1A   | chr16 | 30972657/C//T     | nonsynonymous | 1 | 0 |
| CES1     | chr16 | 55857480/C//T     | nonsynonymous | 1 | 0 |
| CRISPLD2 | chr16 | 84872243/C//T     | nonsynonymous | 1 | 0 |
| NLGN2    | chr17 | 7320721/G//A      | nonsynonymous | 1 | 0 |
| DHRS13   | chr17 | 27228235/A//T     | nonsynonymous | 1 | 0 |
| NF1      | chr17 | 29560133/C//A     | synonymous    | 1 | 0 |
| SLFN14   | chr17 | 33884942/C//T     | nonsynonymous | 1 | 0 |
| ACACA    | chr17 | 35581967/G//A     | synonymous    | 1 | 0 |
| SRCIN1   | chr17 | 36717944/G//A     | synonymous    | 1 | 0 |
| ERBB2    | chr17 | 37883719/C//T     | nonsynonymous | 1 | 0 |
| COG1     | chr17 | 71189223/A//G     | synonymous    | 1 | 0 |
| CCDC102B | chr18 | 66678211/G//C     | nonsynonymous | 1 | 0 |
| SBNO2    | chr19 | 1113634/T//A      | nonsynonymous | 1 | 0 |
| COL5A3   | chr19 | 10090042/G//T     | nonsynonymous | 1 | 0 |
| DNMT1    | chr19 | 10277298/G//A     | synonymous    | 1 | 0 |
| ITPKC    | chr19 | 41239150/C//T     | nonsynonymous | 1 | 0 |
| ZNF283   | chr19 | 44351423/C//T     | nonsynonymous | 1 | 0 |
| MYH14    | chr19 | 50810310/C//T     | nonsynonymous | 1 | 0 |
| KIR3DL2  | chr19 | 55363644/G//A     | nonsynonymous | 1 | 0 |
| SBK2     | chr19 | 56041354/G//A     | nonsynonymous | 1 | 0 |
| NLRP4    | chr19 | 56369450/G//A     | nonsynonymous | 1 | 0 |
| ZNF329   | chr19 | 58640467/A//G     | nonsynonymous | 1 | 0 |
| ZNF274   | chr19 | 58723898/C//T     | nonsynonymous | 1 | 0 |
| HELZ2    | chr20 | 62194317/G//A     | nonsynonymous | 1 | 0 |
| GART     | chr21 | 34878379/G//A     | nonsynonymous | 1 | 0 |



|          |       |                          |               |   |   |
|----------|-------|--------------------------|---------------|---|---|
| TMPRSS2  | chr21 | 42852430/C//T            | nonsynonymous | 1 | 0 |
| COL6A2   | chr21 | 47532733/G//A            | nonsynonymous | 1 | 0 |
| KDELR3   | chr22 | 38864230/G//A            | synonymous    | 1 | 0 |
| RBMXL3   | chrX  | 114424164/G//A           | nonsynonymous | 1 | 0 |
| DKC1     | chrX  | 153993212/C//T           | nonsynonymous | 1 | 0 |
| GLMN     | chr1  | 92713437/T//C            | nonsynonymous | 1 | 0 |
| DPYD     | chr1  | 98060621/T//C            | nonsynonymous | 1 | 0 |
| KIT      | chr4  | 55593610/T//A            | nonsynonymous | 1 | 0 |
| ORAI2    | chr7  | 102087372/T//C           | nonsynonymous | 1 | 0 |
| DCAF4L2  | chr8  | 88885315/C//T            | synonymous    | 1 | 0 |
| BARX1    | chr9  | 96714528/A//C            | nonsynonymous | 1 | 0 |
| BTAF1    | chr10 | 93773457/T//C            | nonsynonymous | 1 | 0 |
| JAKMIP3  | chr10 | 133931086/G//T           | synonymous    | 1 | 0 |
| SMCO3    | chr12 | 14959140/G//A            | nonsynonymous | 1 | 0 |
| SLC8B1   | chr12 | 113754385/A//G           | synonymous    | 1 | 0 |
| GCN1     | chr12 | 120611959/T//G           | nonsynonymous | 1 | 0 |
| COG6     | chr13 | 40229871/A//G            | nonsynonymous | 1 | 0 |
| HYDIN    | chr16 | 70942291/A//G            | synonymous    | 1 | 0 |
| SNORA21  | chr17 | 37009236/T//C            | synonymous    | 1 | 0 |
| ZNF236   | chr18 | 74593374/C//G            | synonymous    | 1 | 0 |
| ZNF547   | chr19 | 57888697/CAGCACATCTTACCA | nonsynonymous | 1 | 0 |
| RIBC1    | chrX  | 53456919/A//G            | nonsynonymous | 1 | 0 |
| ZBTB17   | chr1  | 16271244/T//C            | nonsynonymous | 0 | 1 |
| C1orf112 | chr1  | 169796282/T//TA          | nonsynonymous | 0 | 1 |
| LAX1     | chr1  | 203743233/T//C           | synonymous    | 0 | 1 |
| ZNF678   | chr1  | 227842973/G//T           | nonsynonymous | 0 | 1 |
| APOB     | chr2  | 21263811/TG//T           | nonsynonymous | 0 | 1 |
| ZAP70    | chr2  | 98351805/A//T            | nonsynonymous | 0 | 1 |
| EVX2     | chr2  | 176948135/C//T           | nonsynonymous | 0 | 1 |
| HDAC4    | chr2  | 240033295/C//T           | synonymous    | 0 | 1 |
| NCAPG    | chr4  | 17826628/T//C            | nonsynonymous | 0 | 1 |
| AFF1     | chr4  | 88036350/C//T            | nonsynonymous | 0 | 1 |
| TENM3    | chr4  | 183696228/C//T           | synonymous    | 0 | 1 |
| ADAMTS2  | chr5  | 178634713/G//A           | nonsynonymous | 0 | 1 |
| PUS7     | chr7  | 105103066/A//G           | nonsynonymous | 0 | 1 |
| LZTS1    | chr8  | 20110449/C//T            | synonymous    | 0 | 1 |
| ZFHX4    | chr8  | 77690462/G//T            | nonsynonymous | 0 | 1 |
| DDX50    | chr10 | 70706170/A//G            | synonymous    | 0 | 1 |
| MCU      | chr10 | 74620223/T//C            | nonsynonymous | 0 | 1 |
| BAG3     | chr10 | 121429451/G//A           | nonsynonymous | 0 | 1 |
| OSBPL5   | chr11 | 3111908/G//A             | nonsynonymous | 0 | 1 |
| MYOD1    | chr11 | 17741923/C//T            | synonymous    | 0 | 1 |
| NBEA     | chr13 | 35632917/C//T            | nonsynonymous | 0 | 1 |
| FANCM    | chr14 | 45667892/T//C            | nonsynonymous | 0 | 1 |
| RBM25    | chr14 | 73569928/A//G            | nonsynonymous | 0 | 1 |
| KNL1     | chr15 | 40907540/A//G            | nonsynonymous | 0 | 1 |
| STARD9   | chr15 | 42983333/G//A            | nonsynonymous | 0 | 1 |
| DUOX1    | chr15 | 45454025/A//G            | nonsynonymous | 0 | 1 |
| VPS13C   | chr15 | 62305266/G//A            | nonsynonymous | 0 | 1 |
| ADAMTSL3 | chr15 | 84581991/C//T            | synonymous    | 0 | 1 |
| PDE8A    | chr15 | 85669608/A//G            | synonymous    | 0 | 1 |
| CACNG3   | chr16 | 24372949/G//A            | nonsynonymous | 0 | 1 |
| ZNF768   | chr16 | 30536217/G//A            | nonsynonymous | 0 | 1 |
| HSD3B7   | chr16 | 30998269/G//A            | nonsynonymous | 0 | 1 |
| ZNF532   | chr18 | 56586480/A//G            | nonsynonymous | 0 | 1 |
| UBXN6    | chr19 | 4454018/T//C             | synonymous    | 0 | 1 |
| PRX      | chr19 | 40900428/G//A            | synonymous    | 0 | 1 |
| ZNF880   | chr19 | 52888071/G//T            | nonsynonymous | 0 | 1 |
| PIM3     | chr22 | 50356733/T//C            | synonymous    | 0 | 1 |
| ATRX     | chrX  | 76938655/T//C            | nonsynonymous | 0 | 1 |
| COL4A5   | chrX  | 107936120/C//G           | synonymous    | 0 | 1 |
| ERICH6   | chr3  | 150419932/T//C           | nonsynonymous | 0 | 1 |
| UGT2B28  | chr4  | 70146901/A//G            | nonsynonymous | 0 | 1 |
| HHIP     | chr4  | 145580881/G//A           | nonsynonymous | 0 | 1 |
| AFF4     | chr5  | 132270046/A//G           | synonymous    | 0 | 1 |
| CLVS2    | chr6  | 123319002/T//C           | nonsynonymous | 0 | 1 |
| FAM120B  | chr6  | 170657386/G//A           | nonsynonymous | 0 | 1 |
| OR4C16   | chr11 | 55339875/C//T            | nonsynonymous | 0 | 1 |
| ALKBH8   | chr11 | 107424662/A//G           | nonsynonymous | 0 | 1 |
| GALNS    | chr16 | 88904164/A//G            | synonymous    | 0 | 1 |

|          |       |                |               |   |   |
|----------|-------|----------------|---------------|---|---|
| SALL3    | chr18 | 76754108/C//T  | nonsynonymous | 0 | 1 |
| ONECUT3  | chr19 | 1775286/A//G   | nonsynonymous | 0 | 1 |
| CD209    | chr19 | 7808070/G//A   | nonsynonymous | 0 | 1 |
| ST7L     | chr1  | 113153521/T//C | synonymous    | 0 | 1 |
| TCHH     | chr1  | 152081651/T//C | nonsynonymous | 0 | 1 |
| HSPA6    | chr1  | 161494828/G//A | nonsynonymous | 0 | 1 |
| CTSE     | chr1  | 206325291/A//G | synonymous    | 0 | 1 |
| WDR43    | chr2  | 29136953/A//G  | nonsynonymous | 0 | 1 |
| PLSCR2   | chr3  | 146167020/G//A | synonymous    | 0 | 1 |
| CXCL8    | chr4  | 74607731/T//C  | nonsynonymous | 0 | 1 |
| RADIL    | chr7  | 4845300/T//C   | synonymous    | 0 | 1 |
| CCDC146  | chr7  | 76908116/A//G  | synonymous    | 0 | 1 |
| MUC17    | chr7  | 100681292/C//A | nonsynonymous | 0 | 1 |
| UBAP1    | chr9  | 34241774/A//G  | nonsynonymous | 0 | 1 |
| DDB2     | chr11 | 47238437/T//C  | nonsynonymous | 0 | 1 |
| MAP6     | chr11 | 75379229/C//T  | synonymous    | 0 | 1 |
| MAP6     | chr11 | 75379269/G//A  | nonsynonymous | 0 | 1 |
| KDM5A    | chr12 | 443534/C//CG   | nonsynonymous | 0 | 1 |
| GJA3     | chr13 | 20716597/C//T  | synonymous    | 0 | 1 |
| MDGA2    | chr14 | 47351327/G//A  | nonsynonymous | 0 | 1 |
| ADCY9    | chr16 | 40168771/A//G  | synonymous    | 0 | 1 |
| CNP      | chr17 | 40120522/T//C  | nonsynonymous | 0 | 1 |
| TBX21    | chr17 | 45822704/G//C  | nonsynonymous | 0 | 1 |
| FADS6    | chr17 | 72889527/A//G  | nonsynonymous | 0 | 1 |
| CACNA1A  | chr19 | 13397325/A//G  | nonsynonymous | 0 | 1 |
| CBLC     | chr19 | 45293281/A//G  | nonsynonymous | 0 | 1 |
| EMID1    | chr22 | 29622523/A//G  | nonsynonymous | 0 | 1 |
| NPPA     | chr1  | 11907422/C//T  | synonymous    | 1 | 0 |
| PLEKHM2  | chr1  | 16058989/G//A  | nonsynonymous | 1 | 0 |
| TMEM39B  | chr1  | 32560430/C//G  | nonsynonymous | 1 | 0 |
| MPL      | chr1  | 43818424/G//A  | nonsynonymous | 1 | 0 |
| GBP5     | chr1  | 89730585/C//A  | nonsynonymous | 1 | 0 |
| AMY2B    | chr1  | 104117020/A//G | synonymous    | 1 | 0 |
| DENND2C  | chr1  | 115130018/C//T | synonymous    | 1 | 0 |
| PTGFRN   | chr1  | 117503952/C//T | nonsynonymous | 1 | 0 |
| SETDB1   | chr1  | 150923423/C//T | synonymous    | 1 | 0 |
| TDRKH    | chr1  | 151747253/C//T | synonymous    | 1 | 0 |
| HRNR     | chr1  | 152193217/G//A | synonymous    | 1 | 0 |
| CREB3L4  | chr1  | 153945514/C//T | nonsynonymous | 1 | 0 |
| ASH1L    | chr1  | 155449291/C//T | nonsynonymous | 1 | 0 |
| CD48     | chr1  | 160654960/G//A | synonymous    | 1 | 0 |
| ILDR2    | chr1  | 166890167/C//T | nonsynonymous | 1 | 0 |
| QSOX1    | chr1  | 180165695/C//T | synonymous    | 1 | 0 |
| CFHR1    | chr1  | 196794617/T//G | nonsynonymous | 1 | 0 |
| SYT2     | chr1  | 202571661/C//T | nonsynonymous | 1 | 0 |
| SLC30A3  | chr2  | 27479356/G//A  | nonsynonymous | 1 | 0 |
| HEATR5B  | chr2  | 37259911/G//A  | synonymous    | 1 | 0 |
| ABCG8    | chr2  | 44100976/G//A  | nonsynonymous | 1 | 0 |
| KCNK12   | chr2  | 47748156/C//T  | nonsynonymous | 1 | 0 |
| DYSF     | chr2  | 71780148/T//A  | nonsynonymous | 1 | 0 |
| FAM178B  | chr2  | 97559765/C//T  | synonymous    | 1 | 0 |
| INPP4A   | chr2  | 99163134/C//G  | nonsynonymous | 1 | 0 |
| MYO7B    | chr2  | 128381808/C//T | synonymous    | 1 | 0 |
| EVX2     | chr2  | 176948362/C//T | nonsynonymous | 1 | 0 |
| FSIP2    | chr2  | 186660301/A//T | nonsynonymous | 1 | 0 |
| MFSD6    | chr2  | 191301934/C//A | nonsynonymous | 1 | 0 |
| CDK15    | chr2  | 202698592/C//T | nonsynonymous | 1 | 0 |
| PTPRN    | chr2  | 220174060/C//T | synonymous    | 1 | 0 |
| ITPR1    | chr3  | 4699845/G//A   | nonsynonymous | 1 | 0 |
| BAP1     | chr3  | 52443744/A//G  | nonsynonymous | 1 | 0 |
| ABI3BP   | chr3  | 100527026/T//C | nonsynonymous | 1 | 0 |
| POLQ     | chr3  | 121179010/G//A | nonsynonymous | 1 | 0 |
| MYLK     | chr3  | 123366171/G//A | nonsynonymous | 1 | 0 |
| PLXNA1   | chr3  | 126722211/C//T | synonymous    | 1 | 0 |
| ARHGEF26 | chr3  | 153847382/A//C | nonsynonymous | 1 | 0 |
| MCCC1    | chr3  | 182740248/G//A | nonsynonymous | 1 | 0 |
| ECE2     | chr3  | 184009919/C//T | nonsynonymous | 1 | 0 |
| POLN     | chr4  | 2200402/G//A   | nonsynonymous | 1 | 0 |
| KIAA0232 | chr4  | 6865691/C//T   | synonymous    | 1 | 0 |
| CCDC149  | chr4  | 24838995/C//A  | nonsynonymous | 1 | 0 |

|           |       |                    |               |   |   |
|-----------|-------|--------------------|---------------|---|---|
| PLEKHG4B  | chr5  | 162961/T//C        | nonsynonymous | 1 | 0 |
| IRX4      | chr5  | 1878646/C//T       | nonsynonymous | 1 | 0 |
| FBXL7     | chr5  | 15937053/T//A      | nonsynonymous | 1 | 0 |
| ERBIN     | chr5  | 65288598/C//T      | nonsynonymous | 1 | 0 |
| PCDHA13   | chr5  | 140263557/C//T     | synonymous    | 1 | 0 |
| PCDHB16   | chr5  | 140562537/G//A     | nonsynonymous | 1 | 0 |
| PCDHGB4   | chr5  | 140768431/C//T     | nonsynonymous | 1 | 0 |
| PCDHGB7   | chr5  | 140797794/T//C     | nonsynonymous | 1 | 0 |
| RELL2     | chr5  | 141019113/C//T     | nonsynonymous | 1 | 0 |
| RBM27     | chr5  | 145648798/G//A     | nonsynonymous | 1 | 0 |
| HTR4      | chr5  | 147889584/C//A     | nonsynonymous | 1 | 0 |
| TNIP1     | chr5  | 150411928/C//T     | nonsynonymous | 1 | 0 |
| DOCK2     | chr5  | 169506060/G//C     | nonsynonymous | 1 | 0 |
| MBOAT1    | chr6  | 20113247/G//T      | synonymous    | 1 | 0 |
| HDGFL1    | chr6  | 22570420/G//A      | nonsynonymous | 1 | 0 |
| PRRC2A    | chr6  | 31599035/G//A      | nonsynonymous | 1 | 0 |
| TNXB      | chr6  | 32024600/T//C      | nonsynonymous | 1 | 0 |
| BRPF3     | chr6  | 36182160/A//T      | nonsynonymous | 1 | 0 |
| BMP5      | chr6  | 55620361/A//T      | nonsynonymous | 1 | 0 |
| SESN1     | chr6  | 109315684/ACTCT//A | nonsynonymous | 1 | 0 |
| COL10A1   | chr6  | 116441549/T//A     | nonsynonymous | 1 | 0 |
| TAGAP     | chr6  | 159456894/C//A     | nonsynonymous | 1 | 0 |
| TMEM184A  | chr7  | 1588220/C//T       | nonsynonymous | 1 | 0 |
|           | chr7  | 34917702/G//A      | synonymous    | 1 | 0 |
| GLI3      | chr7  | 42005604/G//A      | nonsynonymous | 1 | 0 |
| STYXL1    | chr7  | 75659845/G//C      | synonymous    | 1 | 0 |
| PEG10     | chr7  | 94293470/C//T      | nonsynonymous | 1 | 0 |
| TFR2      | chr7  | 100218589/C//T     | nonsynonymous | 1 | 0 |
| NOBOX     | chr7  | 144098359/C//A     | nonsynonymous | 1 | 0 |
| GIMAP1    | chr7  | 150417247/G//A     | nonsynonymous | 1 | 0 |
| SLC39A14  | chr8  | 22273438/G//A      | nonsynonymous | 1 | 0 |
| TNFRSF10A | chr8  | 23049319/A//C      | nonsynonymous | 1 | 0 |
| SCARA3    | chr8  | 27516790/A//T      | nonsynonymous | 1 | 0 |
| DDHD2     | chr8  | 38110500/G//A      | nonsynonymous | 1 | 0 |
| ZFHX4     | chr8  | 77617081/C//T      | nonsynonymous | 1 | 0 |
| TSPYL5    | chr8  | 98289299/G//C      | nonsynonymous | 1 | 0 |
| DCSTAMP   | chr8  | 105361214/T//G     | nonsynonymous | 1 | 0 |
| ADGRB1    | chr8  | 143602278/C//T     | nonsynonymous | 1 | 0 |
| CPSF1     | chr8  | 145625083/G//A     | synonymous    | 1 | 0 |
| KIFC2     | chr8  | 145694882/G//A     | nonsynonymous | 1 | 0 |
| IFNA5     | chr9  | 21305261/A//C      | synonymous    | 1 | 0 |
| IDNK      | chr9  | 86243103/G//A      | nonsynonymous | 1 | 0 |
| SMC2      | chr9  | 106889690/C//G     | nonsynonymous | 1 | 0 |
| OR13C3    | chr9  | 107298301/C//T     | nonsynonymous | 1 | 0 |
| AIF1L     | chr9  | 133995718/C//T     | synonymous    | 1 | 0 |
| INPP5E    | chr9  | 139329284/C//T     | nonsynonymous | 1 | 0 |
| SEC16A    | chr9  | 139366460/C//T     | nonsynonymous | 1 | 0 |
| NOTCH1    | chr9  | 139401282/G//A     | nonsynonymous | 1 | 0 |
| ABCA2     | chr9  | 139915179/G//A     | nonsynonymous | 1 | 0 |
| WDR37     | chr10 | 1175265/C//T       | nonsynonymous | 1 | 0 |
| ITIH5     | chr10 | 7679200/G//A       | nonsynonymous | 1 | 0 |
| CUBN      | chr10 | 16882537/G//A      | synonymous    | 1 | 0 |
| WDFY4     | chr10 | 49997923/A//T      | nonsynonymous | 1 | 0 |
| ITPRIP    | chr10 | 106074472/G//A     | synonymous    | 1 | 0 |
|           | chr10 | 126715245/C//T     | synonymous    | 1 | 0 |
| OR52E2    | chr11 | 5080489/G//T       | nonsynonymous | 1 | 0 |
| LYVE1     | chr11 | 10585749/C//A      | nonsynonymous | 1 | 0 |
| OR4A47    | chr11 | 48511134/C//G      | nonsynonymous | 1 | 0 |
| OR8J3     | chr11 | 55904785/G//A      | nonsynonymous | 1 | 0 |
| OR8K1     | chr11 | 56114169/A//G      | nonsynonymous | 1 | 0 |
| OR1S2     | chr11 | 57970709/T//C      | synonymous    | 1 | 0 |
| SLC22A12  | chr11 | 64359388/G//A      | nonsynonymous | 1 | 0 |
| CDC42BPG  | chr11 | 64603955/C//A      | nonsynonymous | 1 | 0 |
| TMEM151A  | chr11 | 66062570/G//T      | nonsynonymous | 1 | 0 |
| CTTN      | chr11 | 70263206/C//T      | nonsynonymous | 1 | 0 |
| ARHGEF17  | chr11 | 73063876/G//A      | nonsynonymous | 1 | 0 |
| MAP6      | chr11 | 75298665/A//T      | nonsynonymous | 1 | 0 |
| FOLH1B    | chr11 | 89405072/G//T      | nonsynonymous | 1 | 0 |
| NCAM1     | chr11 | 113105857/C//T     | nonsynonymous | 1 | 0 |
| BACE1     | chr11 | 117163828/T//C     | nonsynonymous | 1 | 0 |

|          |       |                           |               |   |   |
|----------|-------|---------------------------|---------------|---|---|
| BACE1    | chr11 | 117163830/ATAATACCAC//A   | nonsynonymous | 1 | 0 |
| RPS25    | chr11 | 118888166/G//A            | synonymous    | 1 | 0 |
| BLID     | chr11 | 121986642/A//G            | synonymous    | 1 | 0 |
| OR8D4    | chr11 | 123777849/G//A            | synonymous    | 1 | 0 |
| IGSF9B   | chr11 | 133789874/C//T            | nonsynonymous | 1 | 0 |
| IQSEC3   | chr12 | 247859/G//A               | nonsynonymous | 1 | 0 |
| CACNA2D4 | chr12 | 1992094/C//T              | nonsynonymous | 1 | 0 |
| A2M      | chr12 | 9225467/C//T              | nonsynonymous | 1 | 0 |
| EPS8     | chr12 | 15793674/A//G             | nonsynonymous | 1 | 0 |
| SLCO1B3  | chr12 | 20968669/A//G             | synonymous    | 1 | 0 |
| OVCH1    | chr12 | 29596303/T//A             | nonsynonymous | 1 | 0 |
| LRRK2    | chr12 | 40693045/G//A             | nonsynonymous | 1 | 0 |
| SCAF11   | chr12 | 46342225/A//G             | synonymous    | 1 | 0 |
| SLC4A8   | chr12 | 51852393/A//C             | nonsynonymous | 1 | 0 |
| ZNF385A  | chr12 | 54765375/G//T             | synonymous    | 1 | 0 |
| GPR182   | chr12 | 57389371/C//T             | synonymous    | 1 | 0 |
| TBK1     | chr12 | 64882283/G//A             | nonsynonymous | 1 | 0 |
| FZD10    | chr12 | 130648358/G//A            | nonsynonymous | 1 | 0 |
| PDS5B    | chr13 | 33261315/T//A             | nonsynonymous | 1 | 0 |
| FREM2    | chr13 | 39261908/G//A             | nonsynonymous | 1 | 0 |
| VWA8     | chr13 | 42249395/GACTTCTATATA//G  | nonsynonymous | 1 | 0 |
| RASA3    | chr13 | 114751165/T//C            | nonsynonymous | 1 | 0 |
| RNASE11  | chr14 | 21058393/A//T             | synonymous    | 1 | 0 |
| PPP1R13B | chr14 | 104208420/G//C            | nonsynonymous | 1 | 0 |
| GCHFR    | chr15 | 41056294/C//T             | synonymous    | 1 | 0 |
| MYO9A    | chr15 | 72192034/C//T             | nonsynonymous | 1 | 0 |
| ODF3L1   | chr15 | 76018502/CTCCAACCTGCGT//C | nonsynonymous | 1 | 0 |
| LRRK1    | chr15 | 101601402/A//T            | nonsynonymous | 1 | 0 |
| GRIN2A   | chr16 | 10274008/G//A             | synonymous    | 1 | 0 |
| KCTD13   | chr16 | 29918255/C//T             | nonsynonymous | 1 | 0 |
| NOD2     | chr16 | 50756560/G//A             | synonymous    | 1 | 0 |
| CMTM2    | chr16 | 66622002/C//T             | nonsynonymous | 1 | 0 |
| TP53     | chr17 | 7577106/G//A              | nonsynonymous | 1 | 0 |
| SPDYE4   | chr17 | 8660666/G//A              | nonsynonymous | 1 | 0 |
| NLK      | chr17 | 26518108/G//A             | nonsynonymous | 1 | 0 |
| KRT33B   | chr17 | 39521752/G//A             | synonymous    | 1 | 0 |
| TANC2    | chr17 | 61498656/G//A             | synonymous    | 1 | 0 |
| CDH20    | chr18 | 59221875/C//T             | nonsynonymous | 1 | 0 |
| NETO1    | chr18 | 70526207/A//C             | nonsynonymous | 1 | 0 |
| SMARCA4  | chr19 | 11107217/C//T             | synonymous    | 1 | 0 |
| MAST1    | chr19 | 12958617/AGCCTTCGGGCACAG  | nonsynonymous | 1 | 0 |
| CEBPA    | chr19 | 33792445/G//A             | synonymous    | 1 | 0 |
| FFAR2    | chr19 | 35941124/G//A             | nonsynonymous | 1 | 0 |
| PLEKHG2  | chr19 | 39915013/G//T             | nonsynonymous | 1 | 0 |
| CYP2B6   | chr19 | 41512843/C//G             | nonsynonymous | 1 | 0 |
| CYP2B6   | chr19 | 41512851/G//A             | nonsynonymous | 1 | 0 |
| ZNF574   | chr19 | 42584308/A//G             | nonsynonymous | 1 | 0 |
| BCAT2    | chr19 | 49300484/T//G             | nonsynonymous | 1 | 0 |
| GFY      | chr19 | 49930708/A//G             | nonsynonymous | 1 | 0 |
| NLRP12   | chr19 | 54314260/G//A             | nonsynonymous | 1 | 0 |
| SLC4A11  | chr20 | 3211790/C//T              | synonymous    | 1 | 0 |
| SRC      | chr20 | 36012673/C//T             | synonymous    | 1 | 0 |
| KIAA1755 | chr20 | 36854140/T//A             | nonsynonymous | 1 | 0 |
| SLC32A1  | chr20 | 37356840/G//A             | nonsynonymous | 1 | 0 |
| KCNG1    | chr20 | 49620963/G//A             | synonymous    | 1 | 0 |
|          | chr20 | 57415777/G//T             | synonymous    | 1 | 0 |
| TPTE     | chr21 | 10942951/T//G             | nonsynonymous | 1 | 0 |
| DSCAM    | chr21 | 41710035/G//A             | synonymous    | 1 | 0 |
| COL18A1  | chr21 | 46930131/G//A             | nonsynonymous | 1 | 0 |
| COL6A1   | chr21 | 47412686/C//T             | nonsynonymous | 1 | 0 |
| MOSPD2   | chrX  | 14934432/A//G             | nonsynonymous | 1 | 0 |
| HDAC6    | chrX  | 48682366/G//C             | nonsynonymous | 1 | 0 |
| DGKK     | chrX  | 50123071/G//A             | nonsynonymous | 1 | 0 |
| TRO      | chrX  | 54955077/C//T             | synonymous    | 1 | 0 |
| CPXCR1   | chrX  | 88008985/C//T             | synonymous    | 1 | 0 |
|          | chrX  | 119738707/A//T            | synonymous    | 1 | 0 |
| BGN      | chrX  | 152772062/G//C            | nonsynonymous | 1 | 0 |
| TMCO2    | chr1  | 40713707/GTC//G           | nonsynonymous | 1 | 0 |
| HECTD3   | chr1  | 45476788/G//A             | nonsynonymous | 1 | 0 |
| OTUD7B   | chr1  | 149936239/G//A            | nonsynonymous | 1 | 0 |

|          |       |                  |               |   |   |
|----------|-------|------------------|---------------|---|---|
| HAPLN2   | chr1  | 156593663/G//C   | synonymous    | 1 | 0 |
| ASTN1    | chr1  | 176915236/A//T   | nonsynonymous | 1 | 0 |
| SPATA17  | chr1  | 217804736/C//T   | nonsynonymous | 1 | 0 |
| CHML     | chr1  | 241798781/A//C   | nonsynonymous | 1 | 0 |
| LRP1B    | chr2  | 140992451/G//A   | synonymous    | 1 | 0 |
| C3orf35  | chr3  | 37458982/A//AT   | nonsynonymous | 1 | 0 |
| KIAA1109 | chr4  | 123140626/T//C   | synonymous    | 1 | 0 |
| WWC2     | chr4  | 184186916/A//G   | synonymous    | 1 | 0 |
| SNCAIP   | chr5  | 121787043/G//A   | nonsynonymous | 1 | 0 |
| PCDHGA3  | chr5  | 140725053/G//A   | nonsynonymous | 1 | 0 |
| ZNF727   | chr7  | 63529900/A//G    | nonsynonymous | 1 | 0 |
| POMZP3   | chr7  | 76241077/T//C    | synonymous    | 1 | 0 |
| MUC17    | chr7  | 100676309/A//T   | nonsynonymous | 1 | 0 |
| KMT2C    | chr7  | 151855981/G//T   | nonsynonymous | 1 | 0 |
| SMU1     | chr9  | 33056166/G//C    | nonsynonymous | 1 | 0 |
| CNTRL    | chr9  | 123931981/T//G   | nonsynonymous | 1 | 0 |
| STRBP    | chr9  | 125920339/A//T   | nonsynonymous | 1 | 0 |
|          | chr9  | 138393568/C//T   | synonymous    | 1 | 0 |
| ACTR1A   | chr10 | 104241820/A//G   | nonsynonymous | 1 | 0 |
| TRIM64C  | chr11 | 49080646/G//A    | nonsynonymous | 1 | 0 |
| NELL2    | chr12 | 44913920/GAC//G  | nonsynonymous | 1 | 0 |
| HELB     | chr12 | 66698565/C//G    | nonsynonymous | 1 | 0 |
| MYCBP2   | chr13 | 77755956/C//T    | synonymous    | 1 | 0 |
| HS3ST2   | chr16 | 22826085/G//A    | nonsynonymous | 1 | 0 |
| MEIOC    | chr17 | 42745600/A//G    | nonsynonymous | 1 | 0 |
| TMPRSS9  | chr19 | 2396559/C//T     | synonymous    | 1 | 0 |
| FEM1A    | chr19 | 4793002/A//G     | nonsynonymous | 1 | 0 |
| ARFGEF2  | chr20 | 47605115/A//G    | nonsynonymous | 1 | 0 |
| XPNPEP3  | chr22 | 41253221/C//T    | synonymous    | 1 | 0 |
| B3GALT6  | chr1  | 1168669/C//T     | synonymous    | 0 | 1 |
| DISP3    | chr1  | 11561071/T//A    | nonsynonymous | 0 | 1 |
| ZRANB2   | chr1  | 71546772/G//A    | synonymous    | 0 | 1 |
| COL24A1  | chr1  | 86554881/G//C    | synonymous    | 0 | 1 |
| DNAH7    | chr2  | 196774754/A//G   | synonymous    | 0 | 1 |
| SRGAP3   | chr3  | 9068665/A//G     | synonymous    | 0 | 1 |
| POLQ     | chr3  | 121263724/C//T   | nonsynonymous | 0 | 1 |
| C3orf70  | chr3  | 184800761/G//A   | synonymous    | 0 | 1 |
| PRDM9    | chr5  | 23526431/T//C    | nonsynonymous | 0 | 1 |
| CDH9     | chr5  | 26885845/C//T    | nonsynonymous | 0 | 1 |
| F2RL2    | chr5  | 75913625/T//C    | nonsynonymous | 0 | 1 |
| SLC35D3  | chr6  | 137245656/A//G   | nonsynonymous | 0 | 1 |
| ABHD11   | chr7  | 73152048/A//G    | synonymous    | 0 | 1 |
| MUC17    | chr7  | 100681244/A//G   | nonsynonymous | 0 | 1 |
| CSMD1    | chr8  | 3009026/C//T     | nonsynonymous | 0 | 1 |
| DOCK5    | chr8  | 25177166/C//T    | nonsynonymous | 0 | 1 |
| ZBTB26   | chr9  | 125682099/T//C   | nonsynonymous | 0 | 1 |
| CUL2     | chr10 | 35360234/T//C    | synonymous    | 0 | 1 |
| HK1      | chr10 | 71142545/C//T    | nonsynonymous | 0 | 1 |
| MARCH5   | chr10 | 94070962/A//G    | nonsynonymous | 0 | 1 |
| CDK2AP2  | chr11 | 67275709/C//A    | synonymous    | 0 | 1 |
| PRH1     | chr12 | 11034872/G//A    | nonsynonymous | 0 | 1 |
| FAM186A  | chr12 | 50744528/G//A    | synonymous    | 0 | 1 |
| ENOX1    | chr13 | 43987121/G//T    | synonymous    | 0 | 1 |
| ZSCAN29  | chr15 | 43661940/C//T    | nonsynonymous | 0 | 1 |
| FMNL1    | chr17 | 43315934/T//C    | nonsynonymous | 0 | 1 |
| ZNF57    | chr19 | 2917793/T//C     | nonsynonymous | 0 | 1 |
| ZNF57    | chr19 | 2917807/A//C     | nonsynonymous | 0 | 1 |
| PLIN4    | chr19 | 4511213/C//G     | nonsynonymous | 0 | 1 |
| PPP6R1   | chr19 | 55743204/C//T    | nonsynonymous | 0 | 1 |
| SYNGR1   | chr22 | 39772130/C//A    | nonsynonymous | 0 | 1 |
| ZNF674   | chrX  | 46359599/C//T    | synonymous    | 0 | 1 |
| PARS2    | chr1  | 55223403/G//A    | synonymous    | 1 | 0 |
| SLC26A9  | chr1  | 205890772/G//A   | synonymous    | 1 | 0 |
| GALNT14  | chr2  | 31155034/C//T    | nonsynonymous | 1 | 0 |
| USP34    | chr2  | 61575022/ATGG//A | nonsynonymous | 1 | 0 |
| FEV      | chr2  | 219846695/C//T   | synonymous    | 1 | 0 |
| PPP4R2   | chr3  | 73046176/A//G    | synonymous    | 1 | 0 |
| CLOCK    | chr4  | 56315622/T//C    | nonsynonymous | 1 | 0 |
| POLR2B   | chr4  | 57891137/A//T    | nonsynonymous | 1 | 0 |
| RAPGEF6  | chr5  | 130782227/C//T   | nonsynonymous | 1 | 0 |

|           |       |                          |               |   |   |
|-----------|-------|--------------------------|---------------|---|---|
| TAAR9     | chr6  | 132860062/G//A           | nonsynonymous | 1 | 0 |
| TBX20     | chr7  | 35288458/CAG//C          | synonymous    | 1 | 0 |
| DCLRE1C   | chr10 | 14950898/T//C            | nonsynonymous | 1 | 0 |
| PRKG1     | chr10 | 54041962/CTT//C          | nonsynonymous | 1 | 0 |
| OR4A5     | chr11 | 51411527/T//C            | nonsynonymous | 1 | 0 |
| GIF       | chr11 | 59599212/C//T            | synonymous    | 1 | 0 |
|           | chr11 | 65338051/A//G            | synonymous    | 1 | 0 |
| AMIGO2    | chr12 | 47471582/T//A            | nonsynonymous | 1 | 0 |
| NFE2      | chr12 | 54686443/T//C            | synonymous    | 1 | 0 |
| TMEM132B  | chr12 | 126135412/G//A           | synonymous    | 1 | 0 |
| NBEA      | chr13 | 36180639/A//T            | nonsynonymous | 1 | 0 |
| ACIN1     | chr14 | 23548806/T//C            | nonsynonymous | 1 | 0 |
| HECTD1    | chr14 | 31576161/G//C            | nonsynonymous | 1 | 0 |
| NRDE2     | chr14 | 90754649/T//C            | nonsynonymous | 1 | 0 |
| TRPM1     | chr15 | 31334283/A//G            | nonsynonymous | 1 | 0 |
| NEO1      | chr15 | 73581512/T//C            | synonymous    | 1 | 0 |
| IREB2     | chr15 | 78730661/GA//G           | synonymous    | 1 | 0 |
| SH3GL1    | chr19 | 4363391/T//C             | nonsynonymous | 1 | 0 |
| DOCK6     | chr19 | 11311047/G//A            | nonsynonymous | 1 | 0 |
| CPAMD8    | chr19 | 17085971/C//T            | nonsynonymous | 1 | 0 |
| FAM47A    | chrX  | 34148721/C//T            | nonsynonymous | 1 | 0 |
| RPGR      | chrX  | 38186752/A//G            | synonymous    | 1 | 0 |
| SPANXN3   | chrX  | 142596954/T//A           | nonsynonymous | 1 | 0 |
| SEMA4F    | chr2  | 74902121/C//T            | nonsynonymous | 0 | 1 |
| ZNF804A   | chr2  | 185802754/C//A           | nonsynonymous | 0 | 1 |
| CLGN      | chr4  | 141313486/G//A           | nonsynonymous | 0 | 1 |
| DTNBP1    | chr6  | 15533633/A//G            | synonymous    | 0 | 1 |
| WASF1     | chr6  | 110423026/C//T           | synonymous    | 0 | 1 |
| PCLO      | chr7  | 82764260/T//C            | nonsynonymous | 0 | 1 |
| ZNF425    | chr7  | 148802240/A//G           | synonymous    | 0 | 1 |
| TJP2      | chr9  | 71851980/C//T            | nonsynonymous | 0 | 1 |
| SPATA31E1 | chr9  | 90499929/C//T            | nonsynonymous | 0 | 1 |
| FAM186A   | chr12 | 50754631/T//C            | nonsynonymous | 0 | 1 |
| RPLP0     | chr12 | 120634677/TGGCAGCAGCCACA | nonsynonymous | 0 | 1 |
| SPNS2     | chr17 | 4439624/G//A             | nonsynonymous | 0 | 1 |
| GIPC3     | chr19 | 3586966/G//A             | nonsynonymous | 0 | 1 |
| PRODH2    | chr19 | 36293934/C//T            | nonsynonymous | 0 | 1 |
|           | chrX  | 131803182/A//C           | synonymous    | 0 | 1 |
| GPR153    | chr1  | 6310542/G//A             | synonymous    | 0 | 1 |
| CR1       | chr1  | 207758050/T//C           | nonsynonymous | 0 | 1 |
| TRMT10C   | chr3  | 101284533/A//G           | nonsynonymous | 0 | 1 |
| RAPGEF1   | chr9  | 134459746/C//T           | synonymous    | 0 | 1 |
| OR5T1     | chr11 | 56043679/G//A            | nonsynonymous | 0 | 1 |
| HCRTR1    | chr1  | 32092517/G//A            | nonsynonymous | 0 | 1 |
| AKIRIN1   | chr1  | 39469797/T//C            | synonymous    | 0 | 1 |
| FPGT      | chr1  | 74670339/A//G            | nonsynonymous | 0 | 1 |
| PPM1J     | chr1  | 113255378/G//A           | synonymous    | 0 | 1 |
| RGS13     | chr1  | 192617084/G//T           | nonsynonymous | 0 | 1 |
| SRP9      | chr1  | 225977131/G//A           | synonymous    | 0 | 1 |
| RYR2      | chr1  | 237670088/A//T           | nonsynonymous | 0 | 1 |
| RYR2      | chr1  | 237947543/C//A           | synonymous    | 0 | 1 |
| ASAP2     | chr2  | 9531238/A//T             | nonsynonymous | 0 | 1 |
| TCF23     | chr2  | 27372158/C//A            | nonsynonymous | 0 | 1 |
| FAM179A   | chr2  | 29222324/G//A            | synonymous    | 0 | 1 |
| BUB1      | chr2  | 111415202/C//G           | nonsynonymous | 0 | 1 |
| DDX18     | chr2  | 118579558/G//T           | nonsynonymous | 0 | 1 |
| CWC22     | chr2  | 180818987/C//T           | nonsynonymous | 0 | 1 |
| COL5A2    | chr2  | 189917491/C//A           | nonsynonymous | 0 | 1 |
| HDLBP     | chr2  | 242203873/A//G           | nonsynonymous | 0 | 1 |
| UBE2E1    | chr3  | 23848790/C//T            | synonymous    | 0 | 1 |
| DCLK3     | chr3  | 36778802/G//A            | nonsynonymous | 0 | 1 |
| LRIG1     | chr3  | 66448555/T//C            | nonsynonymous | 0 | 1 |
| MORC1     | chr3  | 108746613/T//C           | synonymous    | 0 | 1 |
| TMEM39A   | chr3  | 119155808/G//A           | synonymous    | 0 | 1 |
| SLC41A3   | chr3  | 125786785/C//T           | synonymous    | 0 | 1 |
| HPS3      | chr3  | 148863228/A//C           | nonsynonymous | 0 | 1 |
| LETM1     | chr4  | 1824714/C//T             | nonsynonymous | 0 | 1 |
| DRD5      | chr4  | 9783698/C//T             | synonymous    | 0 | 1 |
| DRD5      | chr4  | 9784550/G//A             | synonymous    | 0 | 1 |
| LIAS      | chr4  | 39462474/A//G            | nonsynonymous | 0 | 1 |

|           |       |                          |               |   |   |
|-----------|-------|--------------------------|---------------|---|---|
| TMPRSS11A | chr4  | 68788489/C//A            | nonsynonymous | 0 | 1 |
| MMRN1     | chr4  | 90816521/C//G            | synonymous    | 0 | 1 |
| CCDC110   | chr4  | 186381255/G//A           | synonymous    | 0 | 1 |
| ZFP42     | chr4  | 188923974/C//T           | synonymous    | 0 | 1 |
| ADCY2     | chr5  | 7698487/A//C             | nonsynonymous | 0 | 1 |
| DNAH5     | chr5  | 13810221/G//A            | nonsynonymous | 0 | 1 |
| FAM159B   | chr5  | 63986531/C//T            | synonymous    | 0 | 1 |
| APC       | chr5  | 112174682/C//T           | nonsynonymous | 0 | 1 |
| PCDHA6    | chr5  | 140209347/C//T           | synonymous    | 0 | 1 |
| PCDHA8    | chr5  | 140221985/G//A           | nonsynonymous | 0 | 1 |
| PCDHAC1   | chr5  | 140307126/G//A           | nonsynonymous | 0 | 1 |
| POU4F3    | chr5  | 145719850/G//A           | nonsynonymous | 0 | 1 |
| FAM135A   | chr6  | 71212502/A//C            | synonymous    | 0 | 1 |
| POPDC3    | chr6  | 105609486/C//T           | nonsynonymous | 0 | 1 |
| LAMA2     | chr6  | 129823898/A//G           | nonsynonymous | 0 | 1 |
| VNN2      | chr6  | 133065614/C//T           | nonsynonymous | 0 | 1 |
| THSD7A    | chr7  | 11468741/C//T            | nonsynonymous | 0 | 1 |
| AMPH      | chr7  | 38501011/T//C            | nonsynonymous | 0 | 1 |
| HIP1      | chr7  | 75168714/T//C            | nonsynonymous | 0 | 1 |
| COPS6     | chr7  | 99689400/GCT//G          | nonsynonymous | 0 | 1 |
| NRG1      | chr8  | 32453527/A//C            | synonymous    | 0 | 1 |
| ENPP2     | chr8  | 120581552/A//G           | nonsynonymous | 0 | 1 |
| MPDZ      | chr9  | 13123176/G//T            | synonymous    | 0 | 1 |
| USP6NL    | chr10 | 11551593/C//A            | nonsynonymous | 0 | 1 |
| ITGA8     | chr10 | 15714661/G//A            | nonsynonymous | 0 | 1 |
| SPAG6     | chr10 | 22676862/G//T            | nonsynonymous | 0 | 1 |
|           | chr10 | 34601309/G//C            | synonymous    | 0 | 1 |
| OR13A1    | chr10 | 45799046/G//A            | synonymous    | 0 | 1 |
| C10orf71  | chr10 | 50530702/C//T            | nonsynonymous | 0 | 1 |
| TNKS2     | chr10 | 93608295/C//A            | synonymous    | 0 | 1 |
| DNMBP     | chr10 | 101716047/G//A           | nonsynonymous | 0 | 1 |
| TACC2     | chr10 | 123843946/C//T           | nonsynonymous | 0 | 1 |
| DOCK1     | chr10 | 128780201/A//G           | nonsynonymous | 0 | 1 |
| CYP2E1    | chr10 | 135352362/A//T           | nonsynonymous | 0 | 1 |
| TRIM49B   | chr11 | 49059206/C//A            | nonsynonymous | 0 | 1 |
| OR5D13    | chr11 | 55541284/G//A            | nonsynonymous | 0 | 1 |
| TAF6L     | chr11 | 62554636/G//C            | nonsynonymous | 0 | 1 |
| CPT1A     | chr11 | 68564405/G//A            | synonymous    | 0 | 1 |
| HIKESHI   | chr11 | 86056645/C//T            | nonsynonymous | 0 | 1 |
| ALKBH8    | chr11 | 107396214/C//T           | nonsynonymous | 0 | 1 |
| ARHGAP20  | chr11 | 110501514/C//T           | nonsynonymous | 0 | 1 |
| USP28     | chr11 | 113705016/A//G           | synonymous    | 0 | 1 |
| OR6X1     | chr11 | 123624624/GGTTGCTATGA//G | nonsynonymous | 0 | 1 |
| PLEKHG6   | chr12 | 6436475/G//A             | nonsynonymous | 0 | 1 |
| CD163     | chr12 | 7639546/G//A             | nonsynonymous | 0 | 1 |
| BCAT1     | chr12 | 24989497/A//G            | nonsynonymous | 0 | 1 |
| KMT2D     | chr12 | 49424555/C//T            | synonymous    | 0 | 1 |
|           | chr12 | 92818457/A//G            | synonymous    | 0 | 1 |
| GNPTAB    | chr12 | 102159906/G//A           | synonymous    | 0 | 1 |
| OAS3      | chr12 | 113386732/C//T           | nonsynonymous | 0 | 1 |
| TMEM132C  | chr12 | 129190089/C//T           | nonsynonymous | 0 | 1 |
| XPO4      | chr13 | 21357798/C//T            | synonymous    | 0 | 1 |
| SAP18     | chr13 | 21721057/C//T            | nonsynonymous | 0 | 1 |
| AMER2     | chr13 | 25745730/C//T            | nonsynonymous | 0 | 1 |
| FREM2     | chr13 | 39432107/C//T            | synonymous    | 0 | 1 |
|           | chr13 | 96086049/G//A            | synonymous    | 0 | 1 |
| NALCN     | chr13 | 101720386/C//A           | nonsynonymous | 0 | 1 |
| TOX4      | chr14 | 21957375/A//G            | nonsynonymous | 0 | 1 |
| ITPK1     | chr14 | 93408244/C//T            | nonsynonymous | 0 | 1 |
| ALDH1A2   | chr15 | 58306379/T//C            | nonsynonymous | 0 | 1 |
| CDH8      | chr16 | 61935181/G//A            | nonsynonymous | 0 | 1 |
| ALOX12B   | chr17 | 7983246/C//T             | synonymous    | 0 | 1 |
| UBE2Z     | chr17 | 46993462/C//G            | nonsynonymous | 0 | 1 |
| TSPOAP1   | chr17 | 56386507/T//C            | nonsynonymous | 0 | 1 |
| TMEM94    | chr17 | 73494579/G//A            | synonymous    | 0 | 1 |
| B4GALT6   | chr18 | 29238056/G//A            | synonymous    | 0 | 1 |
| ATP8B3    | chr19 | 1799980/G//A             | synonymous    | 0 | 1 |
| FEM1A     | chr19 | 4791935/C//T             | synonymous    | 0 | 1 |
|           | chr19 | 5687800/G//A             | synonymous    | 0 | 1 |
| DOCK6     | chr19 | 11332565/A//G            | nonsynonymous | 0 | 1 |

|            |       |                 |               |   |   |
|------------|-------|-----------------|---------------|---|---|
| WIZ        | chr19 | 15538265/G//A   | synonymous    | 0 | 1 |
| LG14       | chr19 | 35617783/C//T   | nonsynonymous | 0 | 1 |
| NANOS2     | chr19 | 46417485/G//C   | synonymous    | 0 | 1 |
| RPL18      | chr19 | 49118695/G//A   | synonymous    | 0 | 1 |
| PPFIA3     | chr19 | 49637354/C//T   | synonymous    | 0 | 1 |
| NLRP12     | chr19 | 54313563/C//T   | synonymous    | 0 | 1 |
| ZNF584     | chr19 | 58928939/C//T   | nonsynonymous | 0 | 1 |
| CDC25B     | chr20 | 3784059/G//A    | synonymous    | 0 | 1 |
| COL18A1    | chr21 | 46895448/C//T   | nonsynonymous | 0 | 1 |
| SHOX       | chrX  | 591574/C//T     | synonymous    | 0 | 1 |
| PDHA1      | chrX  | 19377042/C//T   | nonsynonymous | 0 | 1 |
| DMD        | chrX  | 32841411/C//A   | nonsynonymous | 0 | 1 |
| SHROOM4    | chrX  | 50378129/G//A   | nonsynonymous | 0 | 1 |
| IQSEC2     | chrX  | 53271080/G//T   | synonymous    | 0 | 1 |
| DGAT2L6    | chrX  | 69424201/A//T   | nonsynonymous | 0 | 1 |
| BCORL1     | chrX  | 129159242/G//A  | synonymous    | 0 | 1 |
| ATP11C     | chrX  | 138882251/A//C  | nonsynonymous | 0 | 1 |
|            | chr1  | 157103884/C//G  | synonymous    | 0 | 1 |
| DPP4       | chr2  | 162877202/G//C  | synonymous    | 0 | 1 |
| COL3A1     | chr2  | 189854168/G//T  | nonsynonymous | 0 | 1 |
| GDNF       | chr5  | 37834848/C//T   | synonymous    | 0 | 1 |
| GIN1       | chr5  | 102440306/A//AC | nonsynonymous | 0 | 1 |
| ZNF311     | chr6  | 28963755/T//C   | nonsynonymous | 0 | 1 |
| ECHDC1     | chr6  | 127652004/C//T  | nonsynonymous | 0 | 1 |
| PURB       | chr7  | 44924879/G//A   | synonymous    | 0 | 1 |
| C8orf89    | chr8  | 74171655/A//G   | synonymous    | 0 | 1 |
| ST6GALNAC6 | chr9  | 130649011/T//C  | nonsynonymous | 0 | 1 |
| CCDC42     | chr17 | 8647039/G//A    | nonsynonymous | 0 | 1 |
| CDC27      | chr17 | 45199943/C//T   | synonymous    | 0 | 1 |
| ENOSF1     | chr18 | 678713/T//C     | nonsynonymous | 0 | 1 |
| HAUS1      | chr18 | 43705706/A//T   | synonymous    | 0 | 1 |
| SREBF2     | chr22 | 42229302/C//G   | nonsynonymous | 0 | 1 |
| GCNA       | chrX  | 70823702/A//G   | nonsynonymous | 0 | 1 |
| TDRD5      | chr1  | 179562603/G//C  | nonsynonymous | 0 | 1 |
| HMCN1      | chr1  | 186158894/C//T  | nonsynonymous | 0 | 1 |
| CHRNA      | chr2  | 233405129/A//G  | nonsynonymous | 0 | 1 |
| RARB       | chr3  | 25502811/C//T   | synonymous    | 0 | 1 |
| LAMB2      | chr3  | 49161966/C//T   | synonymous    | 0 | 1 |
| PCOLCE2    | chr3  | 142606512/G//T  | nonsynonymous | 0 | 1 |
| EPHA5      | chr4  | 66189863/A//T   | nonsynonymous | 0 | 1 |
| KIAA0922   | chr4  | 154541914/G//A  | nonsynonymous | 0 | 1 |
| FBXL21     | chr5  | 135272438/A//G  | nonsynonymous | 0 | 1 |
| GRIA1      | chr5  | 153190725/G//T  | nonsynonymous | 0 | 1 |
| EBF1       | chr5  | 158250213/G//A  | nonsynonymous | 0 | 1 |
| MDFIC      | chr7  | 114563005/G//A  | synonymous    | 0 | 1 |
| PLEC       | chr8  | 144995433/G//A  | synonymous    | 0 | 1 |
| DNAJA1     | chr9  | 33026819/G//T   | nonsynonymous | 0 | 1 |
| CHD4       | chr12 | 6711318/C//T    | synonymous    | 0 | 1 |
| GSX1       | chr13 | 28367040/C//T   | synonymous    | 0 | 1 |
| CPB2       | chr13 | 46679079/C//T   | synonymous    | 0 | 1 |
| OXA1L      | chr14 | 23239471/T//C   | nonsynonymous | 0 | 1 |
| PSMB11     | chr14 | 23511665/T//C   | synonymous    | 0 | 1 |
| KRT17      | chr17 | 39775799/C//T   | synonymous    | 0 | 1 |
| KIF19      | chr17 | 72348091/A//G   | nonsynonymous | 0 | 1 |
| SIGLEC12   | chr19 | 52000187/C//T   | nonsynonymous | 0 | 1 |
|            | chrX  | 69672457/A//G   | synonymous    | 0 | 1 |
| NLGN4Y     | chrY  | 16942322/C//T   | synonymous    | 0 | 1 |
| VWA5B1     | chr1  | 20668960/C//A   | synonymous    | 1 | 0 |
| HTR1D      | chr1  | 23519991/G//T   | nonsynonymous | 1 | 0 |
| PUM1       | chr1  | 31465372/C//A   | nonsynonymous | 1 | 0 |
| SV2A       | chr1  | 149881131/C//G  | synonymous    | 1 | 0 |
| OR10Z1     | chr1  | 158577159/G//T  | nonsynonymous | 1 | 0 |
| OR6K2      | chr1  | 158669897/T//G  | synonymous    | 1 | 0 |
| CD247      | chr1  | 167403267/A//T  | nonsynonymous | 1 | 0 |
| CEP350     | chr1  | 180063298/A//T  | nonsynonymous | 1 | 0 |
| KCNT2      | chr1  | 196397376/C//A  | nonsynonymous | 1 | 0 |
| SNAP47     | chr1  | 227923135/C//T  | nonsynonymous | 1 | 0 |
| OR2T34     | chr1  | 248737978/C//G  | nonsynonymous | 1 | 0 |
| APOB       | chr2  | 21235191/C//A   | nonsynonymous | 1 | 0 |
| USP34      | chr2  | 61605554/T//A   | nonsynonymous | 1 | 0 |



|         |       |                          |               |   |   |
|---------|-------|--------------------------|---------------|---|---|
| EPC2    | chr2  | 149541191/C//G           | nonsynonymous | 1 | 0 |
| INO80D  | chr2  | 206921160/C//A           | nonsynonymous | 1 | 0 |
| TADA2B  | chr4  | 7056494/G//T             | nonsynonymous | 1 | 0 |
| BMP3    | chr4  | 81952578/A//T            | nonsynonymous | 1 | 0 |
| ANK2    | chr4  | 114238917/G//T           | synonymous    | 1 | 0 |
| NEIL3   | chr4  | 178281779/G//T           | nonsynonymous | 1 | 0 |
| MYO10   | chr5  | 16758261/T//TAG          | nonsynonymous | 1 | 0 |
| CDH12   | chr5  | 22078575/C//A            | nonsynonymous | 1 | 0 |
| CDH10   | chr5  | 24593449/G//A            | nonsynonymous | 1 | 0 |
| SPEF2   | chr5  | 35646829/C//G            | nonsynonymous | 1 | 0 |
| EGFLAM  | chr5  | 38435326/C//T            | synonymous    | 1 | 0 |
| HCN1    | chr5  | 45262432/G//A            | nonsynonymous | 1 | 0 |
| RASGRF2 | chr5  | 80256768/T//A            | nonsynonymous | 1 | 0 |
| SEMA6A  | chr5  | 115782441/G//C           | synonymous    | 1 | 0 |
| IL3     | chr5  | 131396687/C//G           | nonsynonymous | 1 | 0 |
| PCDHA4  | chr5  | 140188982/C//A           | nonsynonymous | 1 | 0 |
| PCDHB15 | chr5  | 140625923/C//A           | synonymous    | 1 | 0 |
| TNXB    | chr6  | 32063521/A//G            | synonymous    | 1 | 0 |
| CLPS    | chr6  | 35762910/T//A            | synonymous    | 1 | 0 |
| DNAH8   | chr6  | 38754707/A//G            | synonymous    | 1 | 0 |
| DOPEY1  | chr6  | 83851689/A//G            | nonsynonymous | 1 | 0 |
| LAMA2   | chr6  | 129722460/C//T           | nonsynonymous | 1 | 0 |
| ZNF92   | chr7  | 64864461/A//G            | synonymous    | 1 | 0 |
| LRCH4   | chr7  | 100175450/C//A           | nonsynonymous | 1 | 0 |
| DLGAP2  | chr8  | 1496886/C//T             | synonymous    | 1 | 0 |
| ADAM2   | chr8  | 39624772/T//A            | nonsynonymous | 1 | 0 |
| CHRNA3  | chr8  | 42587179/C//A            | synonymous    | 1 | 0 |
| PXDNL   | chr8  | 52321549/C//A            | nonsynonymous | 1 | 0 |
| CA2     | chr8  | 86388044/G//A            | synonymous    | 1 | 0 |
| ZFPM2   | chr8  | 106813993/T//C           | synonymous    | 1 | 0 |
| ENPP2   | chr8  | 120569930/C//A           | nonsynonymous | 1 | 0 |
| DMRTA1  | chr9  | 22447455/GAGCGCCAGCGCGTC | nonsynonymous | 1 | 0 |
| RASEF   | chr9  | 85615135/G//C            | nonsynonymous | 1 | 0 |
| CACNA1B | chr9  | 141016465/G//A           | synonymous    | 1 | 0 |
| CUBN    | chr10 | 17107643/C//A            | synonymous    | 1 | 0 |
| OGDHL   | chr10 | 50960684/C//A            | nonsynonymous | 1 | 0 |
| CDH23   | chr10 | 73567730/C//A            | nonsynonymous | 1 | 0 |
| NOLC1   | chr10 | 103922036/A//G           | synonymous    | 1 | 0 |
| PCGF6   | chr10 | 105110675/T//C           | nonsynonymous | 1 | 0 |
| CCDC186 | chr10 | 115896990/T//A           | synonymous    | 1 | 0 |
| MUC5B   | chr11 | 1274040/T//C             | nonsynonymous | 1 | 0 |
| PIK3C2A | chr11 | 17190653/T//A            | nonsynonymous | 1 | 0 |
| OR4C6   | chr11 | 55433119/C//T            | synonymous    | 1 | 0 |
| OR5T1   | chr11 | 56043911/C//A            | nonsynonymous | 1 | 0 |
| MS4A4A  | chr11 | 60059727/A//T            | nonsynonymous | 1 | 0 |
| GRM5    | chr11 | 88337961/G//C            | nonsynonymous | 1 | 0 |
| CASP5   | chr11 | 104868212/C//G           | synonymous    | 1 | 0 |
| KDM5A   | chr12 | 427465/G//T              | synonymous    | 1 | 0 |
| PLEKHG6 | chr12 | 6436568/C//A             | nonsynonymous | 1 | 0 |
| NR4A1   | chr12 | 52451312/C//A            | nonsynonymous | 1 | 0 |
| CSAD    | chr12 | 53553991/A//G            | nonsynonymous | 1 | 0 |
| NAV3    | chr12 | 78388609/C//A            | nonsynonymous | 1 | 0 |
| PAH     | chr12 | 103271235/C//A           | synonymous    | 1 | 0 |
| WSCD2   | chr12 | 108620819/C//A           | nonsynonymous | 1 | 0 |
| RPH3A   | chr12 | 113285606/T//A           | synonymous    | 1 | 0 |
| ADGRD1  | chr12 | 131589421/G//T           | nonsynonymous | 1 | 0 |
| TMCO3   | chr13 | 114150008/G//T           | nonsynonymous | 1 | 0 |
| ADCY4   | chr14 | 24792643/T//C            | synonymous    | 1 | 0 |
| PPP2R5E | chr14 | 63856322/C//T            | synonymous    | 1 | 0 |
| RGS6    | chr14 | 73029475/G//T            | synonymous    | 1 | 0 |
| OR4N4   | chr15 | 22382855/G//T            | nonsynonymous | 1 | 0 |
| UACA    | chr15 | 70960066/G//T            | nonsynonymous | 1 | 0 |
| NTRK3   | chr15 | 88476318/C//A            | nonsynonymous | 1 | 0 |
| SSTR5   | chr16 | 1129976/G//T             | synonymous    | 1 | 0 |
| CACNA1H | chr16 | 1252200/G//A             | nonsynonymous | 1 | 0 |
| MEFV    | chr16 | 3304364/G//T             | nonsynonymous | 1 | 0 |
| HS3ST2  | chr16 | 22926931/C//A            | synonymous    | 1 | 0 |
| LCMT1   | chr16 | 25186278/T//A            | nonsynonymous | 1 | 0 |
|         | chr16 | 56374872/C//A            | synonymous    | 1 | 0 |
| AP1G1   | chr16 | 71780585/T//C            | nonsynonymous | 1 | 0 |

|           |       |                           |               |   |   |
|-----------|-------|---------------------------|---------------|---|---|
| TAX1BP3   | chr17 | 3571889/TCGCTGCTTAACAAAGC | synonymous    | 1 | 0 |
| FBXO39    | chr17 | 6684205/C//A              | nonsynonymous | 1 | 0 |
| ACAP1     | chr17 | 7252458/C//A              | nonsynonymous | 1 | 0 |
| ALOX15B   | chr17 | 7950049/G//C              | nonsynonymous | 1 | 0 |
| CCDC144NL | chr17 | 20799219/C//A             | nonsynonymous | 1 | 0 |
| LRRC37B   | chr17 | 30348571/C//G             | nonsynonymous | 1 | 0 |
| ZPBP2     | chr17 | 38027862/T//C             | synonymous    | 1 | 0 |
| TUBG2     | chr17 | 40815492/A//C             | nonsynonymous | 1 | 0 |
| NBR1      | chr17 | 41338394/C//T             | nonsynonymous | 1 | 0 |
| CDC42EP4  | chr17 | 71282614/G//A             | nonsynonymous | 1 | 0 |
| USP36     | chr17 | 76799755/T//C             | nonsynonymous | 1 | 0 |
| CARD14    | chr17 | 78162192/A//C             | nonsynonymous | 1 | 0 |
| STK11     | chr19 | 1220382/C//T              | nonsynonymous | 1 | 0 |
| THOP1     | chr19 | 2808262/G//T              | synonymous    | 1 | 0 |
| MUC16     | chr19 | 9066044/C//A              | synonymous    | 1 | 0 |
| FBXW9     | chr19 | 12800847/T//A             | nonsynonymous | 1 | 0 |
| MAST1     | chr19 | 12976211/G//C             | nonsynonymous | 1 | 0 |
| NCAN      | chr19 | 19329754/G//A             | nonsynonymous | 1 | 0 |
| ZNF208    | chr19 | 22156995/C//A             | nonsynonymous | 1 | 0 |
| CCNE1     | chr19 | 30308172/C//T             | synonymous    | 1 | 0 |
| PPP2R1A   | chr19 | 52714593/C//T             | synonymous    | 1 | 0 |
| NLRP2     | chr19 | 55494243/C//A             | nonsynonymous | 1 | 0 |
| SLC4A11   | chr20 | 3210383/T//C              | nonsynonymous | 1 | 0 |
| KIF16B    | chr20 | 16407878/C//A             | nonsynonymous | 1 | 0 |
| PHACTR3   | chr20 | 58330413/G//A             | nonsynonymous | 1 | 0 |
| C21orf33  | chr21 | 45564833/G//T             | synonymous    | 1 | 0 |
| CCT8L2    | chr22 | 17071686/C//T             | synonymous    | 1 | 0 |
| FRMPD4    | chrX  | 12736441/C//G             | nonsynonymous | 1 | 0 |
| CDK16     | chrX  | 47088182/C//T             | synonymous    | 1 | 0 |
| HUWE1     | chrX  | 53585952/C//A             | nonsynonymous | 1 | 0 |
| TCEAL2    | chrX  | 101381932/G//A            | nonsynonymous | 1 | 0 |
| PCDH11Y   | chrY  | 4968513/C//A              | nonsynonymous | 1 | 0 |
| TDRD5     | chr1  | 179620112/T//C            | synonymous    | 0 | 1 |
| RGL1      | chr1  | 183854066/C//T            | synonymous    | 0 | 1 |
| GGPS1     | chr1  | 235506134/T//C            | synonymous    | 0 | 1 |
| DUSP7     | chr3  | 52090309/G//C             | nonsynonymous | 0 | 1 |
| COL6A5    | chr3  | 130110186/C//A            | nonsynonymous | 0 | 1 |
| ACTL6B    | chr7  | 100244598/A//G            | nonsynonymous | 0 | 1 |
| SERPINE1  | chr7  | 100775226/C//G            | synonymous    | 0 | 1 |
| MASTL     | chr10 | 27454346/A//G             | nonsynonymous | 0 | 1 |
| MS4A10    | chr11 | 60563040/A//G             | nonsynonymous | 0 | 1 |
| KMT2D     | chr12 | 49425823/AGCT//A          | nonsynonymous | 0 | 1 |
| NFIC      | chr19 | 3425108/A//G              | synonymous    | 0 | 1 |
| C3        | chr19 | 6720645/A//G              | synonymous    | 0 | 1 |
| SUGP1     | chr19 | 19387334/A//G             | synonymous    | 0 | 1 |
| ZNF681    | chr19 | 23926692/C//T             | nonsynonymous | 0 | 1 |
| FBXO17    | chr19 | 39440692/C//G             | nonsynonymous | 0 | 1 |
| RBM10     | chrX  | 47030582/G//T             | nonsynonymous | 0 | 1 |
| SUV39H1   | chrX  | 48558976/C//T             | synonymous    | 0 | 1 |
| C1orf64   | chr1  | 16332708/C//T             | nonsynonymous | 0 | 1 |
| TESK2     | chr1  | 45923247/C//T             | nonsynonymous | 0 | 1 |
| IVL       | chr1  | 152882617/G//A            | nonsynonymous | 0 | 1 |
| CREB3L4   | chr1  | 153945249/TGAG//T         | nonsynonymous | 0 | 1 |
| CRB1      | chr1  | 197396959/T//A            | nonsynonymous | 0 | 1 |
| PROX1     | chr1  | 214170220/C//T            | synonymous    | 0 | 1 |
| TP53BP2   | chr1  | 223988399/C//T            | synonymous    | 0 | 1 |
| BCL11A    | chr2  | 60687882/G//A             | nonsynonymous | 0 | 1 |
| USP34     | chr2  | 61415157/AAAAC//A         | synonymous    | 0 | 1 |
| USP34     | chr2  | 61441268/C//T             | nonsynonymous | 0 | 1 |
| CPS1      | chr2  | 211507306/G//C            | nonsynonymous | 0 | 1 |
| CACNA1D   | chr3  | 53757573/C//T             | synonymous    | 0 | 1 |
| MAGI1     | chr3  | 65342524/G//A             | synonymous    | 0 | 1 |
| EPHA6     | chr3  | 97466367/G//C             | nonsynonymous | 0 | 1 |
| RUBCN     | chr3  | 197409421/C//T            | synonymous    | 0 | 1 |
| TRIO      | chr5  | 14477072/C//CGTAA         | synonymous    | 0 | 1 |
| TTC23L    | chr5  | 34864627/T//A             | nonsynonymous | 0 | 1 |
| PCDHB10   | chr5  | 140574175/G//C            | nonsynonymous | 0 | 1 |
| ARAP3     | chr5  | 141052424/G//C            | nonsynonymous | 0 | 1 |
| KIF4B     | chr5  | 154397196/T//G            | synonymous    | 0 | 1 |
| EBF1      | chr5  | 158526374/T//C            | nonsynonymous | 0 | 1 |

|                |       |                   |               |   |   |
|----------------|-------|-------------------|---------------|---|---|
| USP49          | chr6  | 41773423/G//A     | synonymous    | 0 | 1 |
| PTCHD4         | chr6  | 47847063/A//G     | nonsynonymous | 0 | 1 |
| PKHD1          | chr6  | 51612715/G//T     | synonymous    | 0 | 1 |
| SGK1           | chr6  | 134491989/ATCT//A | nonsynonymous | 0 | 1 |
| DNAH11         | chr7  | 21631098/G//C     | nonsynonymous | 0 | 1 |
| SSPO           | chr7  | 149488783/C//T    | nonsynonymous | 0 | 1 |
| CTSB           | chr8  | 11704681/G//C     | synonymous    | 0 | 1 |
| CARNMT1        | chr9  | 77631350/GTT//G   | synonymous    | 0 | 1 |
| PRDX3          | chr10 | 120934022/G//A    | synonymous    | 0 | 1 |
| PAOX           | chr10 | 135195017/T//A    | nonsynonymous | 0 | 1 |
| ABTB2          | chr11 | 34192517/G//A     | nonsynonymous | 0 | 1 |
| MED17          | chr11 | 93540780/A//G     | synonymous    | 0 | 1 |
| DYNC2H1        | chr11 | 103041005/T//C    | nonsynonymous | 0 | 1 |
| VPS11          | chr11 | 118947782/G//C    | nonsynonymous | 0 | 1 |
| ARHGEF12       | chr11 | 120351130/C//T    | nonsynonymous | 0 | 1 |
| A2M            | chr12 | 9258949/A//G      | synonymous    | 0 | 1 |
| KANSL2         | chr12 | 49063018/G//C     | synonymous    | 0 | 1 |
| ITGA7          | chr12 | 56086623/C//A     | synonymous    | 0 | 1 |
| LRP1           | chr12 | 57598290/A//T     | synonymous    | 0 | 1 |
| POLR3B         | chr12 | 106848487/G//A    | nonsynonymous | 0 | 1 |
| AACS           | chr12 | 125570949/A//T    | synonymous    | 0 | 1 |
| ZNF84          | chr12 | 133634654/GAC//G  | nonsynonymous | 0 | 1 |
| DIS3           | chr13 | 73342966/T//G     | nonsynonymous | 0 | 1 |
| SRP54          | chr14 | 35492268/A//G     | nonsynonymous | 0 | 1 |
| RTN1           | chr14 | 60194198/C//A     | nonsynonymous | 0 | 1 |
| GANC           | chr15 | 42630650/TACTC//T | nonsynonymous | 0 | 1 |
| MYO5C          | chr15 | 52571772/C//T     | nonsynonymous | 0 | 1 |
| CORO2B         | chr15 | 69004035/G//T     | nonsynonymous | 0 | 1 |
| EFL1           | chr15 | 82444297/G//A     | nonsynonymous | 0 | 1 |
| XYLT1          | chr16 | 17211800/G//A     | nonsynonymous | 0 | 1 |
| CHD3           | chr17 | 7810967/G//T      | nonsynonymous | 0 | 1 |
| GGNBP2         | chr17 | 34923614/A//G     | nonsynonymous | 0 | 1 |
| PRKCA          | chr17 | 64684448/C//T     | nonsynonymous | 0 | 1 |
| C19orf45       | chr19 | 7566044/C//A      | nonsynonymous | 0 | 1 |
|                | chr19 | 18375326/G//T     | synonymous    | 0 | 1 |
| ZNF486         | chr19 | 20307806/C//A     | nonsynonymous | 0 | 1 |
| ZNF527         | chr19 | 37880479/G//A     | nonsynonymous | 0 | 1 |
| DHX34          | chr19 | 47856561/G//T     | nonsynonymous | 0 | 1 |
| ZNF541         | chr19 | 48052653/T//A     | nonsynonymous | 0 | 1 |
| PRAME          | chr22 | 22893313/G//A     | nonsynonymous | 0 | 1 |
| ZXDA           | chrX  | 57936978/C//G     | synonymous    | 0 | 1 |
| KLHL13         | chrX  | 117043440/T//G    | nonsynonymous | 0 | 1 |
| PRDM16         | chr1  | 3301849/A//G      | nonsynonymous | 0 | 1 |
| KLF17          | chr1  | 44595163/T//C     | nonsynonymous | 0 | 1 |
| ELAVL4         | chr1  | 50666631/C//T     | synonymous    | 0 | 1 |
| NOS1AP         | chr1  | 162124255/C//T    | nonsynonymous | 0 | 1 |
| DPT            | chr1  | 168670333/C//T    | nonsynonymous | 0 | 1 |
| PRRC2C         | chr1  | 171491368/G//A    | nonsynonymous | 0 | 1 |
| DENND1B        | chr1  | 197510108/T//C    | nonsynonymous | 0 | 1 |
| PXDN           | chr2  | 1668851/C//T      | synonymous    | 0 | 1 |
| GYPC           | chr2  | 127447870/A//T    | nonsynonymous | 0 | 1 |
| FMNL2          | chr2  | 153483202/C//A    | nonsynonymous | 0 | 1 |
| KIT            | chr4  | 55603420/A//G     | nonsynonymous | 0 | 1 |
| SLCO4C1        | chr5  | 101606411/C//T    | nonsynonymous | 0 | 1 |
| TBC1D9B        | chr5  | 179306701/G//A    | nonsynonymous | 0 | 1 |
| MUC21          | chr6  | 30955382/C//T     | nonsynonymous | 0 | 1 |
| EYS            | chr6  | 64498113/G//A     | synonymous    | 0 | 1 |
| LAMA2          | chr6  | 129573315/A//G    | synonymous    | 0 | 1 |
| BCLAF1         | chr6  | 136599103/C//T    | nonsynonymous | 0 | 1 |
| FERD3L         | chr7  | 19184820/G//A     | nonsynonymous | 0 | 1 |
|                | chr7  | 94903240/G//T     | synonymous    | 0 | 1 |
| KDM7A          | chr7  | 139829417/C//T    | synonymous    | 0 | 1 |
| MSR1           | chr8  | 16001066/C//T     | nonsynonymous | 0 | 1 |
| UBXN8          | chr8  | 30614303/A//G     | nonsynonymous | 0 | 1 |
| GRHPR          | chr9  | 37436696/C//T     | nonsynonymous | 0 | 1 |
| CNTNAP3        | chr9  | 39132943/C//T     | nonsynonymous | 0 | 1 |
| MSANTD3-TMEFF1 | chr9  | 103310072/T//C    | nonsynonymous | 0 | 1 |
| PPA1           | chr10 | 71977608/G//A     | nonsynonymous | 0 | 1 |
| DOCK1          | chr10 | 129216764/G//A    | nonsynonymous | 0 | 1 |
| DNHD1          | chr11 | 6568201/G//A      | nonsynonymous | 0 | 1 |

|          |       |                           |               |   |   |
|----------|-------|---------------------------|---------------|---|---|
| SLC35C1  | chr11 | 45832477/G//A             | nonsynonymous | 0 | 1 |
| PPME1    | chr11 | 73958143/A//G             | synonymous    | 0 | 1 |
| JAML     | chr11 | 118081198/G//A            | synonymous    | 0 | 1 |
| KCNA5    | chr12 | 5153956/G//A              | nonsynonymous | 0 | 1 |
| C12orf57 | chr12 | 7053665/T//C              | nonsynonymous | 0 | 1 |
| AICDA    | chr12 | 8757413/C//T              | nonsynonymous | 0 | 1 |
| SLCO1B3  | chr12 | 21054390/C//T             | synonymous    | 0 | 1 |
| KIF21A   | chr12 | 39730984/T//C             | nonsynonymous | 0 | 1 |
| SLC41A2  | chr12 | 105255083/G//A            | nonsynonymous | 0 | 1 |
| DNAH10   | chr12 | 124403440/G//A            | nonsynonymous | 0 | 1 |
| GLT1D1   | chr12 | 129360490/G//A            | nonsynonymous | 0 | 1 |
| RIMBP2   | chr12 | 130935810/G//A            | nonsynonymous | 0 | 1 |
| PCDH9    | chr13 | 67801737/G//T             | nonsynonymous | 0 | 1 |
| CRIP2    | chr14 | 105944815/C//A            | nonsynonymous | 0 | 1 |
| SRCAP    | chr16 | 30750376/G//A             | synonymous    | 0 | 1 |
| ZNF319   | chr16 | 58030510/C//T             | nonsynonymous | 0 | 1 |
| ATP2A3   | chr17 | 3831618/C//A              | nonsynonymous | 0 | 1 |
| STAT5B   | chr17 | 40362215/A//G             | nonsynonymous | 0 | 1 |
| MEIOC    | chr17 | 42734017/T//C             | synonymous    | 0 | 1 |
| ZNF136   | chr19 | 12298752/A//G             | nonsynonymous | 0 | 1 |
| ZNF563   | chr19 | 12430623/A//G             | synonymous    | 0 | 1 |
| SPTBN4   | chr19 | 41009902/C//T             | nonsynonymous | 0 | 1 |
| CCDC114  | chr19 | 48805993/G//A             | nonsynonymous | 0 | 1 |
| TARM1    | chr19 | 54578369/G//A             | synonymous    | 0 | 1 |
| MYLK2    | chr20 | 30419606/G//A             | nonsynonymous | 0 | 1 |
| FAAH     | chr1  | 46871046/C//T             | synonymous    | 0 | 1 |
| CELSR2   | chr1  | 109813852/T//C            | nonsynonymous | 0 | 1 |
| MEX3A    | chr1  | 156046686/AGAG//A         | nonsynonymous | 0 | 1 |
| CACNA1E  | chr1  | 181546947/G//C            | synonymous    | 0 | 1 |
| ZNF648   | chr1  | 182026134/G//C            | nonsynonymous | 0 | 1 |
| MAP3K21  | chr1  | 233463917/A//G            | nonsynonymous | 0 | 1 |
| MAP3K21  | chr1  | 233490692/T//A            | nonsynonymous | 0 | 1 |
| FMN2     | chr1  | 240256023/TGCA//T         | nonsynonymous | 0 | 1 |
| HNRNPU   | chr1  | 245018760/C//G            | nonsynonymous | 0 | 1 |
| SLC30A6  | chr2  | 32396422/C//G             | nonsynonymous | 0 | 1 |
| CTNNA2   | chr2  | 80085164/C//T             | synonymous    | 0 | 1 |
| TTN      | chr2  | 179407204/C//G            | nonsynonymous | 0 | 1 |
| PLCL1    | chr2  | 198950551/G//A            | synonymous    | 0 | 1 |
| NKTR     | chr3  | 42679465/A//T             | nonsynonymous | 0 | 1 |
| GYG1     | chr3  | 148714146/C//T            | synonymous    | 0 | 1 |
| SLITRK3  | chr3  | 164908099/T//C            | nonsynonymous | 0 | 1 |
| GRID2    | chr4  | 94006379/G//A             | nonsynonymous | 0 | 1 |
| DDIT4L   | chr4  | 101111166/A//C            | synonymous    | 0 | 1 |
| VCAN     | chr5  | 82836034/A//T             | nonsynonymous | 0 | 1 |
| APC      | chr5  | 112175198/C//T            | nonsynonymous | 0 | 1 |
| ADGRB3   | chr6  | 69685195/G//C             | nonsynonymous | 0 | 1 |
| PHIP     | chr6  | 79664962/G//A             | nonsynonymous | 0 | 1 |
| REV3L    | chr6  | 111656707/T//TG           | nonsynonymous | 0 | 1 |
| ABCA13   | chr7  | 48319472/T//A             | nonsynonymous | 0 | 1 |
| NOS3     | chr7  | 150705989/TCCTCAGCCCTCACC | synonymous    | 0 | 1 |
| CPSF1    | chr8  | 145626084/G//A            | nonsynonymous | 0 | 1 |
| FAM122A  | chr9  | 71395653/C//G             | nonsynonymous | 0 | 1 |
| ASB13    | chr10 | 5693202/G//A              | nonsynonymous | 0 | 1 |
| NCOA4    | chr10 | 51580937/C//G             | nonsynonymous | 0 | 1 |
| OR52K1   | chr11 | 4510924/G//A              | nonsynonymous | 0 | 1 |
| EXPH5    | chr11 | 108385394/A//G            | synonymous    | 0 | 1 |
| TECTA    | chr11 | 120976656/C//T            | nonsynonymous | 0 | 1 |
| TAS2R46  | chr12 | 11214879/C//A             | synonymous    | 0 | 1 |
| GPR19    | chr12 | 12814146/T//C             | nonsynonymous | 0 | 1 |
| LRRK2    | chr12 | 40672050/C//T             | nonsynonymous | 0 | 1 |
| DIP2B    | chr12 | 51089093/T//C             | nonsynonymous | 0 | 1 |
| ULK1     | chr12 | 132393283/C//T            | synonymous    | 0 | 1 |
| POLE2    | chr14 | 50133051/T//C             | synonymous    | 0 | 1 |
| FAH      | chr15 | 80467429/G//C             | synonymous    | 0 | 1 |
| ACSM2B   | chr16 | 20554464/A//G             | nonsynonymous | 0 | 1 |
| ARHGAP27 | chr17 | 43472704/C//T             | synonymous    | 0 | 1 |
| UTP18    | chr17 | 49338127/T//C             | nonsynonymous | 0 | 1 |
| SCN4A    | chr17 | 62050003/T//C             | nonsynonymous | 0 | 1 |
| NEDD4L   | chr18 | 55996241/A//G             | nonsynonymous | 0 | 1 |
| MADCAM1  | chr19 | 498079/G//C               | nonsynonymous | 0 | 1 |

|          |       |                       |               |   |   |
|----------|-------|-----------------------|---------------|---|---|
| PTPRS    | chr19 | 5222958/GGAGAAGGAC//G | nonsynonymous | 0 | 1 |
| ZNF331   | chr19 | 54080960/G//A         | synonymous    | 0 | 1 |
| SNTA1    | chr20 | 32005712/C//T         | nonsynonymous | 0 | 1 |
| JPH2     | chr20 | 42744819/G//A         | nonsynonymous | 0 | 1 |
| CDH4     | chr20 | 60511941/C//T         | synonymous    | 0 | 1 |
| PI4KA    | chr22 | 21158696/C//G         | synonymous    | 0 | 1 |
| PRAME    | chr22 | 22893212/G//T         | synonymous    | 0 | 1 |
| LARGE1   | chr22 | 34046553/G//A         | nonsynonymous | 0 | 1 |
| UXT      | chrX  | 47518241/T//G         | nonsynonymous | 0 | 1 |
| STARD8   | chrX  | 67937719/TGAGGATGG//T | nonsynonymous | 0 | 1 |
| MED12    | chrX  | 70354569/C//G         | synonymous    | 0 | 1 |
| ARMCX2   | chrX  | 100911414/A//G        | synonymous    | 0 | 1 |
| COL4A5   | chrX  | 107865997/A//G        | synonymous    | 0 | 1 |
| EFCAB7   | chr1  | 64022832/G//C         | nonsynonymous | 1 | 0 |
| CLCA1    | chr1  | 86952406/C//T         | synonymous    | 1 | 0 |
| SPAG17   | chr1  | 118550809/C//T        | nonsynonymous | 1 | 0 |
| HRNR     | chr1  | 152192648/C//T        | nonsynonymous | 1 | 0 |
| GATAD2B  | chr1  | 153784275/C//T        | nonsynonymous | 1 | 0 |
| WNT9A    | chr1  | 228109374/G//A        | nonsynonymous | 1 | 0 |
| MAP3K21  | chr1  | 233498021/C//T        | nonsynonymous | 1 | 0 |
| RYR2     | chr1  | 237890502/C//T        | synonymous    | 1 | 0 |
| EPAS1    | chr2  | 46609650/G//A         | nonsynonymous | 1 | 0 |
| EIF2AK3  | chr2  | 88888278/C//T         | nonsynonymous | 1 | 0 |
| ZAP70    | chr2  | 98340650/G//A         | nonsynonymous | 1 | 0 |
| EIF5B    | chr2  | 100009444/G//A        | synonymous    | 1 | 0 |
| FAP      | chr2  | 163074615/A//G        | nonsynonymous | 1 | 0 |
| SNED1    | chr2  | 242007271/G//A        | nonsynonymous | 1 | 0 |
| TRANK1   | chr3  | 36873092/C//T         | nonsynonymous | 1 | 0 |
| CCNL1    | chr3  | 156867901/T//C        | nonsynonymous | 1 | 0 |
| KDR      | chr4  | 55953916/C//G         | nonsynonymous | 1 | 0 |
| TACR3    | chr4  | 104511030/C//T        | nonsynonymous | 1 | 0 |
| FAT1     | chr4  | 187557801/G//A        | nonsynonymous | 1 | 0 |
| DNAH5    | chr5  | 13829794/C//T         | nonsynonymous | 1 | 0 |
| ADGRV1   | chr5  | 89981640/G//A         | synonymous    | 1 | 0 |
| APC      | chr5  | 112175907/C//G        | nonsynonymous | 1 | 0 |
| PCDHA1   | chr5  | 140167762/C//T        | synonymous    | 1 | 0 |
| PCDHA12  | chr5  | 140256686/G//A        | synonymous    | 1 | 0 |
| PCDHB15  | chr5  | 140625359/C//T        | synonymous    | 1 | 0 |
| HIST1H3E | chr6  | 26225656/G//T         | nonsynonymous | 1 | 0 |
| MDC1     | chr6  | 30675208/G//T         | nonsynonymous | 1 | 0 |
| EYS      | chr6  | 65300806/A//G         | nonsynonymous | 1 | 0 |
| LATS1    | chr6  | 150004255/C//T        | nonsynonymous | 1 | 0 |
| LOXL2    | chr8  | 23190988/C//T         | nonsynonymous | 1 | 0 |
| OPRK1    | chr8  | 54142294/C//T         | nonsynonymous | 1 | 0 |
| NBN      | chr8  | 90958412/T//A         | nonsynonymous | 1 | 0 |
| RIMS2    | chr8  | 104934016/T//C        | synonymous    | 1 | 0 |
| FAM135B  | chr8  | 139153536/C//T        | nonsynonymous | 1 | 0 |
| PUF60    | chr8  | 144898899/C//T        | nonsynonymous | 1 | 0 |
| MPDZ     | chr9  | 13121870/G//A         | nonsynonymous | 1 | 0 |
| OR13J1   | chr9  | 35870034/C//T         | nonsynonymous | 1 | 0 |
| PRRX2    | chr9  | 132484619/T//A        | synonymous    | 1 | 0 |
| DIP2C    | chr10 | 436702/C//T           | synonymous    | 1 | 0 |
| MLLT10   | chr10 | 21884287/A//G         | nonsynonymous | 1 | 0 |
| CDH23    | chr10 | 73571109/C//T         | nonsynonymous | 1 | 0 |
| HBD      | chr11 | 5255663/T//C          | nonsynonymous | 1 | 0 |
| CABP2    | chr11 | 67287283/G//A         | synonymous    | 1 | 0 |
| IGHMBP2  | chr11 | 68673583/G//A         | nonsynonymous | 1 | 0 |
| HEPHL1   | chr11 | 93796831/C//T         | synonymous    | 1 | 0 |
| CEP57    | chr11 | 95546688/T//C         | synonymous    | 1 | 0 |
| EPS8     | chr12 | 15819385/G//A         | synonymous    | 1 | 0 |
| KRAS     | chr12 | 25378562/C//G         | nonsynonymous | 1 | 0 |
| TRHDE    | chr12 | 73046109/C//A         | nonsynonymous | 1 | 0 |
| C12orf74 | chr12 | 93100450/G//C         | nonsynonymous | 1 | 0 |
| POLR3B   | chr12 | 106889916/G//T        | nonsynonymous | 1 | 0 |
| MTUS2    | chr13 | 29855976/C//T         | nonsynonymous | 1 | 0 |
| NBEA     | chr13 | 35745571/C//T         | nonsynonymous | 1 | 0 |
| KLF5     | chr13 | 73636639/C//G         | nonsynonymous | 1 | 0 |
| TCL1A    | chr14 | 96178712/G//A         | nonsynonymous | 1 | 0 |
| PPP1R13B | chr14 | 104204182/G//A        | synonymous    | 1 | 0 |
| NSMCE3   | chr15 | 29561026/G//A         | nonsynonymous | 1 | 0 |

|             |       |                       |               |   |   |
|-------------|-------|-----------------------|---------------|---|---|
| TGM7        | chr15 | 43571406/C//T         | nonsynonymous | 1 | 0 |
| FBN1        | chr15 | 48787439/C//A         | nonsynonymous | 1 | 0 |
| KIF23       | chr15 | 69708349/C//T         | nonsynonymous | 1 | 0 |
| BNC1        | chr15 | 83931848/G//A         | nonsynonymous | 1 | 0 |
| TRAF7       | chr16 | 2226323/G//A          | nonsynonymous | 1 | 0 |
| PRSS8       | chr16 | 31144207/C//T         | nonsynonymous | 1 | 0 |
| HPR         | chr16 | 72110819/G//A         | nonsynonymous | 1 | 0 |
| GSE1        | chr16 | 85696586/G//A         | nonsynonymous | 1 | 0 |
| PABPN1L     | chr16 | 88930646/G//A         | nonsynonymous | 1 | 0 |
| MYH4        | chr17 | 10358985/C//T         | nonsynonymous | 1 | 0 |
| SHISA6      | chr17 | 11461388/A//G         | nonsynonymous | 1 | 0 |
| COX10       | chr17 | 14110308/A//AGCCCCTGT | nonsynonymous | 1 | 0 |
| FBXW10      | chr17 | 18647651/T//C         | nonsynonymous | 1 | 0 |
| FAM83G      | chr17 | 18874593/C//T         | synonymous    | 1 | 0 |
| EPOP        | chr17 | 36829808/C//T         | nonsynonymous | 1 | 0 |
| CACNA1G     | chr17 | 48650035/C//T         | synonymous    | 1 | 0 |
| PRR11       | chr17 | 57262793/A//T         | synonymous    | 1 | 0 |
| VMP1        | chr17 | 57851137/A//G         | nonsynonymous | 1 | 0 |
| CSH2        | chr17 | 61949599/C//T         | nonsynonymous | 1 | 0 |
| SCN4A       | chr17 | 62024482/G//T         | nonsynonymous | 1 | 0 |
| SLC39A11    | chr17 | 70845904/G//A         | nonsynonymous | 1 | 0 |
| SEC14L1     | chr17 | 75189555/A//T         | nonsynonymous | 1 | 0 |
| LOXHD1      | chr18 | 44057524/C//T         | nonsynonymous | 1 | 0 |
| DOT1L       | chr19 | 2199932/A//G          | nonsynonymous | 1 | 0 |
| THOP1       | chr19 | 2810693/G//A          | synonymous    | 1 | 0 |
| HSD11B1L    | chr19 | 5688297/C//T          | synonymous    | 1 | 0 |
| RFX2        | chr19 | 6044281/G//A          | nonsynonymous | 1 | 0 |
| PPAN-P2RY11 | chr19 | 10225241/C//T         | nonsynonymous | 1 | 0 |
| ZNF536      | chr19 | 31039467/C//T         | nonsynonymous | 1 | 0 |
| TSHZ3       | chr19 | 31770391/G//A         | nonsynonymous | 1 | 0 |
| ATP1A3      | chr19 | 42482320/G//A         | nonsynonymous | 1 | 0 |
| ZNF415      | chr19 | 53611776/G//A         | nonsynonymous | 1 | 0 |
| ZNF530      | chr19 | 58117659/C//T         | nonsynonymous | 1 | 0 |
| GNAS        | chr20 | 57429236/G//A         | nonsynonymous | 1 | 0 |
| GNAS        | chr20 | 57484420/C//T         | nonsynonymous | 1 | 0 |
| TPTE        | chr21 | 10914363/C//T         | synonymous    | 1 | 0 |
| HSF2BP      | chr21 | 45076539/C//T         | nonsynonymous | 1 | 0 |
| NLGN4X      | chrX  | 5821879/G//A          | synonymous    | 1 | 0 |
| TLR8        | chrX  | 12940255/T//C         | synonymous    | 1 | 0 |
| POLA1       | chrX  | 24735881/C//T         | synonymous    | 1 | 0 |
| GK          | chrX  | 30737580/G//A         | nonsynonymous | 1 | 0 |
| MAOB        | chrX  | 43637944/G//A         | synonymous    | 1 | 0 |
| USP11       | chrX  | 47104443/G//A         | synonymous    | 1 | 0 |
| SYN1        | chrX  | 47434143/C//T         | nonsynonymous | 1 | 0 |
| SATL1       | chrX  | 84362915/G//A         | nonsynonymous | 1 | 0 |
| RBMXL3      | chrX  | 114426744/G//A        | nonsynonymous | 1 | 0 |
| THOC2       | chrX  | 122830662/G//A        | nonsynonymous | 1 | 0 |
| MTM1        | chrX  | 149818250/A//G        | nonsynonymous | 1 | 0 |
| MTCP1       | chrX  | 154294192/C//T        | nonsynonymous | 1 | 0 |
| TARDBP      | chr1  | 11078910/T//A         | nonsynonymous | 1 | 0 |
| PRAMEF1     | chr1  | 12855898/C//T         | nonsynonymous | 1 | 0 |
| RNPEP       | chr1  | 201951920/C//T        | synonymous    | 1 | 0 |
| PGBD5       | chr1  | 230486805/C//T        | nonsynonymous | 1 | 0 |
| MAP3K21     | chr1  | 233497916/C//T        | nonsynonymous | 1 | 0 |
| NCKAP5      | chr2  | 133618083/A//T        | synonymous    | 1 | 0 |
| HOXD8       | chr2  | 176995085/T//C        | synonymous    | 1 | 0 |
| ERBB4       | chr2  | 212578372/A//G        | synonymous    | 1 | 0 |
| ERBB4       | chr2  | 212615399/C//T        | nonsynonymous | 1 | 0 |
| KIT         | chr4  | 55593603/TGGAAGG//T   | nonsynonymous | 1 | 0 |
| KIT         | chr4  | 55594258/T//C         | nonsynonymous | 1 | 0 |
|             | chr5  | 126387609/G//A        | synonymous    | 1 | 0 |
| TENM2       | chr5  | 167689675/G//A        | nonsynonymous | 1 | 0 |
| PCLO        | chr7  | 82580650/G//A         | nonsynonymous | 1 | 0 |
| ATP6V0A4    | chr7  | 138394426/G//A        | nonsynonymous | 1 | 0 |
| HR          | chr8  | 21980020/C//A         | nonsynonymous | 1 | 0 |
| FANCC       | chr9  | 97879628/A//G         | synonymous    | 1 | 0 |
| RGS3        | chr9  | 116346364/G//A        | nonsynonymous | 1 | 0 |
| MUC6        | chr11 | 1016756/G//A          | synonymous    | 1 | 0 |
| OR8I2       | chr11 | 55861245/A//G         | synonymous    | 1 | 0 |
| APOBEC1     | chr12 | 7805221/G//C          | synonymous    | 1 | 0 |

|          |       |                     |               |   |   |
|----------|-------|---------------------|---------------|---|---|
| YBX3     | chr12 | 10862670/C//T       | nonsynonymous | 1 | 0 |
| RHEBL1   | chr12 | 49460397/C//G       | synonymous    | 1 | 0 |
| FAIM2    | chr12 | 50264381/G//A       | nonsynonymous | 1 | 0 |
| CCDC92   | chr12 | 124421990/C//T      | nonsynonymous | 1 | 0 |
| DAAM1    | chr14 | 59806785/T//C       | synonymous    | 1 | 0 |
| ZC2HC1C  | chr14 | 75537903/G//T       | nonsynonymous | 1 | 0 |
| TOX3     | chr16 | 52473242/G//T       | synonymous    | 1 | 0 |
| SLFN11   | chr17 | 33690685/G//A       | nonsynonymous | 1 | 0 |
| PDK2     | chr17 | 48186661/G//A       | nonsynonymous | 1 | 0 |
| QRICH2   | chr17 | 74276944/C//A       | nonsynonymous | 1 | 0 |
| FSCN2    | chr17 | 79495674/C//T       | synonymous    | 1 | 0 |
| FASN     | chr17 | 80043515/A//G       | nonsynonymous | 1 | 0 |
| SPTBN4   | chr19 | 41066078/A//C       | nonsynonymous | 1 | 0 |
| LENG8    | chr19 | 54967868/G//C       | nonsynonymous | 1 | 0 |
| URB1     | chr21 | 33709798/C//T       | synonymous    | 1 | 0 |
| CECR2    | chr22 | 18022054/C//T       | nonsynonymous | 1 | 0 |
| NPTXR    | chr22 | 39222613/G//A       | synonymous    | 1 | 0 |
| SNU13    | chr22 | 42070861/A//G       | synonymous    | 1 | 0 |
| PAGE1    | chrX  | 49455858/C//T       | nonsynonymous | 1 | 0 |
| AMER1    | chrX  | 63410313/G//T       | nonsynonymous | 1 | 0 |
| MAP7D1   | chr1  | 36642310/GAGA//G    | nonsynonymous | 0 | 1 |
| STXBP3   | chr1  | 109289364/C//T      | nonsynonymous | 0 | 1 |
| DENND4B  | chr1  | 153914805/T//C      | nonsynonymous | 0 | 1 |
| KCNK2    | chr1  | 215368364/G//T      | nonsynonymous | 0 | 1 |
| PXDN     | chr2  | 1652633/G//A        | synonymous    | 0 | 1 |
| ALMS1    | chr2  | 73678590/G//T       | nonsynonymous | 0 | 1 |
| VWA3B    | chr2  | 98809455/A//T       | nonsynonymous | 0 | 1 |
| MARCH7   | chr2  | 160585594/AGTGC//A  | nonsynonymous | 0 | 1 |
| KCNH7    | chr2  | 163360995/C//T      | synonymous    | 0 | 1 |
| SCN3A    | chr2  | 166011159/C//T      | nonsynonymous | 0 | 1 |
| XIRP2    | chr2  | 168115731/G//A      | synonymous    | 0 | 1 |
| TTN      | chr2  | 179430818/G//A      | nonsynonymous | 0 | 1 |
| EPHA3    | chr3  | 89391072/GTCCGCT//G | nonsynonymous | 0 | 1 |
| SNX4     | chr3  | 125208266/C//T      | synonymous    | 0 | 1 |
| PRR23A   | chr3  | 138724770/G//A      | nonsynonymous | 0 | 1 |
| DGKG     | chr3  | 185986591/G//A      | nonsynonymous | 0 | 1 |
| DKK2     | chr4  | 107847019/G//A      | nonsynonymous | 0 | 1 |
| ANK2     | chr4  | 114279112/G//A      | nonsynonymous | 0 | 1 |
| PCDH18   | chr4  | 138452494/G//T      | nonsynonymous | 0 | 1 |
| SLC6A3   | chr5  | 1406366/G//A        | synonymous    | 0 | 1 |
| DNAH5    | chr5  | 13810172/G//A       | synonymous    | 0 | 1 |
| CDH12    | chr5  | 22078802/A//G       | synonymous    | 0 | 1 |
| CDH6     | chr5  | 31267728/C//T       | nonsynonymous | 0 | 1 |
| RASA1    | chr5  | 86674288/C//T       | nonsynonymous | 0 | 1 |
| SLC23A1  | chr5  | 138714339/C//T      | nonsynonymous | 0 | 1 |
| SPRY4    | chr5  | 141694154/G//A      | nonsynonymous | 0 | 1 |
| CSNK1A1  | chr5  | 148929690/C//T      | nonsynonymous | 0 | 1 |
| ARSI     | chr5  | 149677099/C//T      | nonsynonymous | 0 | 1 |
| SLC36A3  | chr5  | 15066876/G//A       | synonymous    | 0 | 1 |
| HFE      | chr6  | 26091613/T//C       | nonsynonymous | 0 | 1 |
| MUC22    | chr6  | 31002760/C//T       | synonymous    | 0 | 1 |
| TNXB     | chr6  | 32021419/C//T       | nonsynonymous | 0 | 1 |
| HDAC2    | chr6  | 114277295/G//A      | nonsynonymous | 0 | 1 |
| HEY2     | chr6  | 126080810/C//T      | synonymous    | 0 | 1 |
| ESR1     | chr6  | 152265629/C//T      | nonsynonymous | 0 | 1 |
| SYNE1    | chr6  | 152454621/T//C      | synonymous    | 0 | 1 |
| ARID1B   | chr6  | 157528133/G//T      | nonsynonymous | 0 | 1 |
| INTS1    | chr7  | 1510498/G//A        | synonymous    | 0 | 1 |
| INTS1    | chr7  | 1511235/C//T        | nonsynonymous | 0 | 1 |
| NXPH1    | chr7  | 8790753/G//A        | nonsynonymous | 0 | 1 |
| C7orf71  | chr7  | 26686141/C//T       | synonymous    | 0 | 1 |
| CAMK2B   | chr7  | 44259764/C//T       | nonsynonymous | 0 | 1 |
| IGFBP1   | chr7  | 45928224/G//A       | synonymous    | 0 | 1 |
| ABCA13   | chr7  | 48311785/G//A       | nonsynonymous | 0 | 1 |
| DGKI     | chr7  | 137080408/C//T      | nonsynonymous | 0 | 1 |
| ATP6V0A4 | chr7  | 138482810/A//G      | synonymous    | 0 | 1 |
| DLGAP2   | chr8  | 1496964/C//T        | synonymous    | 0 | 1 |
| CSMD1    | chr8  | 2813210/C//T        | nonsynonymous | 0 | 1 |
| RIMS2    | chr8  | 105261803/C//T      | synonymous    | 0 | 1 |
| LRP12    | chr8  | 105509515/C//T      | nonsynonymous | 0 | 1 |

|                |       |                          |               |   |   |
|----------------|-------|--------------------------|---------------|---|---|
|                | chr8  | 144671575/T//C           | synonymous    | 0 | 1 |
| TYRP1          | chr9  | 12694273/C//T            | nonsynonymous | 0 | 1 |
| TAF1L          | chr9  | 32630463/G//A            | synonymous    | 0 | 1 |
| APBA1          | chr9  | 72131174/G//A            | nonsynonymous | 0 | 1 |
| MSANTD3-TMEFF1 | chr9  | 103323731/T//C           | synonymous    | 0 | 1 |
| SVEP1          | chr9  | 113198774/C//T           | synonymous    | 0 | 1 |
| CUL2           | chr10 | 35320420/T//A            | nonsynonymous | 0 | 1 |
| NRAP           | chr10 | 115410252/G//A           | nonsynonymous | 0 | 1 |
| OR51A4         | chr11 | 4967809/G//T             | nonsynonymous | 0 | 1 |
| TUB            | chr11 | 8122144/G//A             | nonsynonymous | 0 | 1 |
| MYOD1          | chr11 | 17741920/C//T            | synonymous    | 0 | 1 |
|                | chr11 | 17801104/C//T            | synonymous    | 0 | 1 |
| EXT2           | chr11 | 44219449/T//C            | nonsynonymous | 0 | 1 |
| CREB3L1        | chr11 | 46339016/C//T            | synonymous    | 0 | 1 |
| SLC39A13       | chr11 | 47435028/C//T            | synonymous    | 0 | 1 |
| OR8H2          | chr11 | 55872750/G//A            | nonsynonymous | 0 | 1 |
| INCENP         | chr11 | 61897635/G//A            | synonymous    | 0 | 1 |
| LRP5           | chr11 | 68193589/A//G            | nonsynonymous | 0 | 1 |
| NXPE2          | chr11 | 114577600/C//T           | nonsynonymous | 0 | 1 |
| USP5           | chr12 | 6969584/C//T             | nonsynonymous | 0 | 1 |
| DDIT3          | chr12 | 57910578/A//G            | synonymous    | 0 | 1 |
| CAND1          | chr12 | 67700353/C//T            | nonsynonymous | 0 | 1 |
| BEST3          | chr12 | 70048984/G//A            | synonymous    | 0 | 1 |
| MIPEP          | chr13 | 24411824/A//T            | synonymous    | 0 | 1 |
| MIPEP          | chr13 | 24411825/AG//A           | nonsynonymous | 0 | 1 |
| COG6           | chr13 | 40253690/C//A            | nonsynonymous | 0 | 1 |
| CNMD           | chr13 | 53313270/C//T            | nonsynonymous | 0 | 1 |
| FAM155A        | chr13 | 108518419/C//T           | nonsynonymous | 0 | 1 |
| C14orf169      | chr14 | 73959080/T//C            | nonsynonymous | 0 | 1 |
| APBA2          | chr15 | 29346112/G//A            | nonsynonymous | 0 | 1 |
| RPS27L         | chr15 | 63446193/A//G            | synonymous    | 0 | 1 |
| KBTBD13        | chr15 | 65370123/G//A            | nonsynonymous | 0 | 1 |
| PRSS41         | chr16 | 2848596/G//A             | synonymous    | 0 | 1 |
| GRIN2A         | chr16 | 9943712/G//A             | nonsynonymous | 0 | 1 |
| MKL2           | chr16 | 14342896/G//A            | synonymous    | 0 | 1 |
| PRKCB          | chr16 | 24135187/C//T            | nonsynonymous | 0 | 1 |
| ZNF688         | chr16 | 30581294/G//T            | nonsynonymous | 0 | 1 |
| RNF40          | chr16 | 30773833/CAG//C          | synonymous    | 0 | 1 |
| ADGRG3         | chr16 | 57713101/G//A            | nonsynonymous | 0 | 1 |
| UTP4           | chr16 | 69177217/G//A            | nonsynonymous | 0 | 1 |
| ZNF778         | chr16 | 89288555/A//G            | synonymous    | 0 | 1 |
| ZNF232         | chr17 | 5009805/A//G             | nonsynonymous | 0 | 1 |
| RNF222         | chr17 | 8296744/A//G             | synonymous    | 0 | 1 |
| RAI1           | chr17 | 17699461/C//T            | nonsynonymous | 0 | 1 |
| TBX2           | chr17 | 59485586/C//T            | nonsynonymous | 0 | 1 |
| LRR37A3        | chr17 | 62893346/C//A            | synonymous    | 0 | 1 |
| NARF           | chr17 | 80417947/A//G            | nonsynonymous | 0 | 1 |
| FN3K           | chr17 | 80699254/C//T            | synonymous    | 0 | 1 |
| MEP1B          | chr18 | 29775442/A//AGCTTGGG     | nonsynonymous | 0 | 1 |
| GTF2F1         | chr19 | 6381587/C//T             | synonymous    | 0 | 1 |
| ZNF560         | chr19 | 9577878/G//A             | nonsynonymous | 0 | 1 |
| MAST1          | chr19 | 12979553/G//A            | nonsynonymous | 0 | 1 |
| LG14           | chr19 | 35622424/C//T            | nonsynonymous | 0 | 1 |
| TRAPPC6A       | chr19 | 45667170/TCACAGACGGGCAGG | nonsynonymous | 0 | 1 |
| HRC            | chr19 | 49657913/C//T            | synonymous    | 0 | 1 |
| TARM1          | chr19 | 54577356/G//A            | synonymous    | 0 | 1 |
| ZNF549         | chr19 | 58049854/C//T            | synonymous    | 0 | 1 |
| ANKEF1         | chr20 | 10025071/G//A            | synonymous    | 0 | 1 |
| DLGAP4         | chr20 | 35060415/C//T            | nonsynonymous | 0 | 1 |
| SEM2           | chr20 | 43851947/T//G            | nonsynonymous | 0 | 1 |
| FAM65C         | chr20 | 49226184/C//T            | nonsynonymous | 0 | 1 |
| CTCFL          | chr20 | 56099365/GAGTTGAAACA//G  | synonymous    | 0 | 1 |
| COL20A1        | chr20 | 61943878/C//T            | nonsynonymous | 0 | 1 |
| PRPF6          | chr20 | 62664380/A//C            | synonymous    | 0 | 1 |
| DSCAM          | chr21 | 41710046/C//T            | nonsynonymous | 0 | 1 |
| PPIL2          | chr22 | 22039136/A//G            | synonymous    | 0 | 1 |
| SEC14L6        | chr22 | 30928795/G//A            | nonsynonymous | 0 | 1 |
| RFPL3          | chr22 | 32754103/A//C            | nonsynonymous | 0 | 1 |
| EP300          | chr22 | 41545858/C//T            | nonsynonymous | 0 | 1 |
|                | chr22 | 45958897/G//A            | synonymous    | 0 | 1 |



|        |      |                |               |   |   |
|--------|------|----------------|---------------|---|---|
| NRK    | chrX | 105153818/C//T | nonsynonymous | 0 | 1 |
| OPN1LW | chrX | 153421829/A//G | nonsynonymous | 0 | 1 |

---
